# Supplementary material
Source: publisher figshare collection journal article supplement (https://karger.figshare.com/articles/dataset/_/5104408)
Supplement: Supplementary file 1 [file 1]

ctg1□□□WAG-51D17  
ctg1□□□WAG-51I22  
ctg1□□□WAG-65I20  
ctg1□□□WAG-106G8  
ctg1□□□WAG-123P23  
ctg1□ctg3025□ctg3025□WAG-15K7  
ctg1□ctg3025□ctg3025□WAG-54N4  
ctg1□ctg3025□ctg3025□WAG-125A16  
ctg1□ctg394□□WAG-5G18  
ctg1□ctg394□ctg2549□WAG-40M4  
ctg1□ctg394□ctg2549□WAG-71C15  
ctg1□ctg394□ctg2549□WAG-114L9  
ctg1□ctg394□ctg386□WAG-23F7  
ctg1□ctg394□ctg386□WAG-70K11  
ctg1□ctg394□ctg386□WAG-79G12  
ctg1□ctg394□ctg386□WAG-92P22  
ctg1□ctg394□ctg386□WAG-95I12  
ctg1□ctg394□ctg386□WAG-115A2  
ctg1□ctg394□ctg386□WAG-130J10  
ctg1□ctg4450□□WAG-21J21  
ctg1□ctg4450□□WAG-50J8  
ctg1□ctg4450□□WAG-63L7  
ctg1□ctg4450□□WAG-76C2  
ctg1□ctg6391□□WAG-69L17  
ctg1□ctg6391□□WAG-86I16  
ctg1□ctg6395□□WAG-13C1  
ctg1□ctg6395□□WAG-63J15  
ctg1□ctg7□□WAG-54I24  
ctg1□ctg7□□WAG-74I21  
ctg1□ctg7□ctg5□WAG-6O6  
ctg1□ctg7□ctg5□WAG-32C2  
ctg1□ctg7□ctg5□WAG-42H24  
ctg1□ctg7□ctg5□WAG-51O21  
ctg1□ctg7□ctg5□WAG-57P7  
ctg1□ctg7□ctg5□WAG-58F12  
ctg1□ctg7□ctg5□WAG-59O20  
ctg1□ctg7□ctg5□WAG-78G9  
ctg1□ctg7□ctg5□WAG-80H24  
ctg1□ctg7□ctg5□WAG-84H17  
ctg1□ctg7□ctg5□WAG-86D15  
ctg1□ctg7□ctg5□WAG-88B19  
ctg1□ctg7□ctg5□WAG-109L13  
ctg1□ctg7□ctg5□WAG-129J13  
ctg1□ctg7□ctg5□WAG-130B18  
ctg10□ctg1058□□WAG-36N4  
ctg10□ctg1058□ctg900□WAG-6O3  
ctg10□ctg1058□ctg900□WAG-10L5  
ctg10□ctg1058□ctg900□WAG-19C4  
ctg10□ctg1058□ctg900□WAG-31E2  
ctg10□ctg1058□ctg900□WAG-38O14  
ctg10□ctg1058□ctg900□WAG-73A11  
ctg10□ctg1058□ctg900□WAG-76G8  
ctg10□ctg1058□ctg900□WAG-79B21  
ctg10□ctg1058□ctg900□WAG-83H24  
ctg10□ctg1058□ctg900□WAG-89E1  
ctg10□ctg1058□ctg900□WAG-103G13

ctg10□ctg4484□ctg4623□WAG-40N17  
ctg10□ctg4484□ctg4623□WAG-89H5  
ctg100□□□WAG-111A15  
ctg100□ctg2311□ctg2212□WAG-81P1  
ctg100□ctg2311□ctg2212□WAG-107O9  
ctg100□ctg2311□ctg2212□WAG-111B15  
ctg100□ctg2311□ctg2212□WAG-111F18  
ctg1000□ctg2363□ctg2263□WAG-16A18  
ctg1000□ctg2363□ctg2263□WAG-100N7  
ctg1000□ctg2363□ctg2263□WAG-109H1  
ctg1000□ctg3783□□WAG-82G22  
ctg1000□ctg3783□ctg5015□WAG-43F23  
ctg1000□ctg3783□ctg5015□WAG-44M14  
ctg1001□ctg2844□□WAG-92K21  
ctg1001□ctg2844□ctg2833□WAG-45M1  
ctg1001□ctg2844□ctg2833□WAG-48I18  
ctg1001□ctg2844□ctg2833□WAG-83I5  
ctg1001□ctg2844□ctg2833□WAG-87K10  
ctg1001□ctg5422□ctg6439□WAG-27J6  
ctg1001□ctg5422□ctg6439□WAG-128N22  
ctg1002□□□WAG-102G21  
ctg1002□ctg2364□ctg2264□WAG-9B21  
ctg1002□ctg2364□ctg2264□WAG-54F13  
ctg1002□ctg2364□ctg2264□WAG-72M8  
ctg1002□ctg2602□□WAG-91G18  
ctg1002□ctg2602□□WAG-94F6  
ctg1002□ctg2602□ctg2565□WAG-42H21  
ctg1002□ctg2602□ctg2565□WAG-47J17  
ctg1002□ctg2602□ctg2565□WAG-68E2  
ctg1002□ctg2602□ctg2565□WAG-89O3  
ctg1002□ctg2602□ctg2565□WAG-119F7  
ctg1003□ctg2365□□WAG-56O22  
ctg1003□ctg2365□□WAG-102P21  
ctg1003□ctg2365□ctg3067□WAG-16D1  
ctg1003□ctg2365□ctg3067□WAG-44B16  
ctg1003□ctg2365□ctg3067□WAG-47C2  
ctg1003□ctg2365□ctg3067□WAG-81G16  
ctg1003□ctg2365□ctg3067□WAG-108G5  
ctg1003□ctg2365□ctg3067□WAG-119H17  
ctg1004□ctg2366□□WAG-47L12  
ctg1004□ctg2366□□WAG-67N6  
ctg1004□ctg2366□□WAG-88D8  
ctg1004□ctg2366□□WAG-105L8  
ctg1004□ctg2366□□WAG-115G20  
ctg1004□ctg2366□ctg3988□WAG-15N12  
ctg1004□ctg2366□ctg3988□WAG-117N9  
ctg1005□ctg2038□□WAG-93B21  
ctg1005□ctg2038□ctg3305□WAG-68I17  
ctg1005□ctg2038□ctg3305□WAG-78I12  
ctg1005□ctg2038□ctg3305□WAG-88F2  
ctg1005□ctg2038□ctg3305□WAG-111L14  
ctg1006□ctg2061□ctg1921□WAG-56C8  
ctg1006□ctg2061□ctg1921□WAG-101A1  
ctg1006□ctg2061□ctg1921□WAG-111L24  
ctg1006□ctg2061□ctg1921□WAG-129K24  
ctg1006□ctg5051□ctg5578□WAG-24M1

ctg1006□ctg5051□ctg5578□WAG-128B10  
ctg1007□□□WAG-124K10  
ctg1007□ctg2819□□WAG-46B21  
ctg1007□ctg2819□ctg3709□WAG-22A14  
ctg1007□ctg2819□ctg3709□WAG-53J13  
ctg1007□ctg2819□ctg3709□WAG-124A13  
ctg1007□ctg2819□ctg3709□WAG-125L10  
ctg1007□ctg3599□□WAG-70F22  
ctg1007□ctg3599□□WAG-74O1  
ctg1007□ctg3599□ctg4687□WAG-44E21  
ctg1007□ctg3599□ctg4687□WAG-123G13  
ctg1008□ctg2388□□WAG-12F13  
ctg1008□ctg2388□□WAG-71J22  
ctg1008□ctg2388□□WAG-103G1  
ctg1008□ctg2388□□WAG-122M11  
ctg1008□ctg2388□ctg3883□WAG-31G20  
ctg1008□ctg2388□ctg3883□WAG-81I16  
ctg1008□ctg2388□ctg3883□WAG-104I2  
ctg1008□ctg2388□ctg3883□WAG-108P22  
ctg1009□□□WAG-23F24  
ctg1009□ctg2976□ctg3712□WAG-15P1  
ctg1009□ctg2976□ctg3712□WAG-67G16  
ctg1009□ctg2976□ctg3712□WAG-77M15  
ctg1009□ctg2976□ctg3712□WAG-92J5  
ctg1009□ctg2976□ctg3712□WAG-117H9  
ctg1009□ctg2976□ctg4886□WAG-100D2  
ctg1009□ctg2976□ctg4886□WAG-129D16  
ctg101□ctg339□□WAG-36I3  
ctg101□ctg339□ctg326□WAG-21I20  
ctg101□ctg339□ctg326□WAG-34N10  
ctg101□ctg339□ctg326□WAG-50P13  
ctg101□ctg339□ctg326□WAG-67L24  
ctg101□ctg339□ctg326□WAG-68H18  
ctg101□ctg339□ctg326□WAG-91P4  
ctg101□ctg339□ctg326□WAG-127J11  
ctg1010□□□WAG-99F16  
ctg1010□ctg2479□□WAG-96K7  
ctg1010□ctg2479□ctg2400□WAG-24L6  
ctg1010□ctg2479□ctg2400□WAG-87E8  
ctg1010□ctg2479□ctg2400□WAG-103E20  
ctg1010□ctg2479□ctg2400□WAG-129N21  
ctg1011□□□WAG-48D11  
ctg1011□□□WAG-87J6  
ctg1011□ctg3276□□WAG-17J23  
ctg1011□ctg3276□□WAG-41M16  
ctg1011□ctg3276□□WAG-101E9  
ctg1011□ctg3276□□WAG-104A2  
ctg1011□ctg3276□□WAG-113C6  
ctg1011□ctg3276□ctg4342□WAG-79N16  
ctg1011□ctg3276□ctg4342□WAG-102J4  
ctg1012□□□WAG-113K10  
ctg1012□ctg2391□□WAG-83O12  
ctg1012□ctg2391□ctg2464□WAG-41O6  
ctg1012□ctg2391□ctg2464□WAG-49K6  
ctg1012□ctg2391□ctg2464□WAG-75N11  
ctg1013□□□WAG-95E8

ctg1013□ctg2470□□WAG-115E16  
ctg1013□ctg2470□ctg2394□WAG-91B11  
ctg1013□ctg2470□ctg2394□WAG-98P5  
ctg1013□ctg2470□ctg2394□WAG-113G17  
ctg1014□ctg2054□□WAG-45G4  
ctg1014□ctg2054□□WAG-65P16  
ctg1014□ctg2054□ctg3457□WAG-3C23  
ctg1014□ctg2054□ctg3457□WAG-81B19  
ctg1014□ctg2054□ctg3457□WAG-108K4  
ctg1015□□□WAG-I8  
ctg1015□□□WAG-I14  
ctg1015□□□WAG-50P3  
ctg1015□□□WAG-92G4  
ctg1015□ctg2876□ctg2868□WAG-19A7  
ctg1015□ctg2876□ctg2868□WAG-60N9  
ctg1015□ctg2876□ctg2868□WAG-130N23  
ctg1015□ctg4636□□WAG-14N9  
ctg1015□ctg4636□□WAG-33G2  
ctg1015□ctg4636□□WAG-100H3  
ctg1016□□□WAG-71M12  
ctg1016□ctg2394□□WAG-13F18  
ctg1016□ctg2394□ctg2295□WAG-44E23  
ctg1016□ctg2394□ctg2295□WAG-51P14  
ctg1016□ctg2394□ctg2295□WAG-58F14  
ctg1016□ctg2394□ctg2295□WAG-113B1  
ctg1016□ctg2394□ctg2295□WAG-130K17  
ctg1016□ctg5764□□WAG-73L15  
ctg1016□ctg5764□□WAG-109M9  
ctg1017□□□WAG-44I10  
ctg1017□□□WAG-78N18  
ctg1017□□□WAG-93B11  
ctg1017□□□WAG-96E24  
ctg1017□ctg3356□ctg3433□WAG-23H10  
ctg1017□ctg3356□ctg3433□WAG-79G8  
ctg1017□ctg5343□ctg6266□WAG-61H14  
ctg1017□ctg5343□ctg6266□WAG-79N20  
ctg1018□□□WAG-9O21  
ctg1018□ctg2395□□WAG-12B10  
ctg1018□ctg2395□ctg2983□WAG-5K13  
ctg1018□ctg2395□ctg2983□WAG-56A17  
ctg1018□ctg2395□ctg2983□WAG-68F16  
ctg1018□ctg2395□ctg2983□WAG-101M13  
ctg1018□ctg2395□ctg2983□WAG-112B10  
ctg1019□□□WAG-4E17  
ctg1019□□□WAG-64C1  
ctg1019□□□WAG-78N14  
ctg1019□□□WAG-127E6  
ctg1019□ctg3464□ctg3585□WAG-21I18  
ctg1019□ctg3464□ctg3585□WAG-61F12  
ctg1019□ctg3464□ctg3585□WAG-111A1  
ctg1019□ctg4439□□WAG-25F6  
ctg1019□ctg4439□□WAG-33N15  
ctg1019□ctg4439□□WAG-57A12  
ctg1019□ctg5016□ctg5495□WAG-13A15  
ctg1019□ctg5016□ctg5495□WAG-114H23  
ctg102□ctg341□□WAG-14N6

ctg102□ctg341□□WAG-59B9  
ctg102□ctg341□□WAG-66N20  
ctg102□ctg341□□WAG-118B5  
ctg102□ctg341□ctg669□WAG-19L18  
ctg102□ctg341□ctg669□WAG-19M19  
ctg102□ctg341□ctg669□WAG-65K24  
ctg102□ctg341□ctg669□WAG-69I22  
ctg102□ctg341□ctg669□WAG-79F20  
ctg102□ctg341□ctg669□WAG-96E12  
ctg102□ctg341□ctg669□WAG-110C1  
ctg102□ctg341□ctg669□WAG-124E5  
ctg1020□ctg2057□□WAG-111G6  
ctg1020□ctg2057□ctg1917□WAG-40N3  
ctg1020□ctg2057□ctg1917□WAG-53J3  
ctg1020□ctg2057□ctg1917□WAG-68B16  
ctg1020□ctg2057□ctg1917□WAG-106F9  
ctg1021□ctg2227□□WAG-10J22  
ctg1021□ctg2227□□WAG-25A2  
ctg1021□ctg2227□ctg2111□WAG-42C8  
ctg1021□ctg2227□ctg2111□WAG-52D2  
ctg1021□ctg2227□ctg2111□WAG-101O19  
ctg1021□ctg2227□ctg2111□WAG-113A20  
ctg1022□□□WAG-5E22  
ctg1022□ctg2406□ctg2304□WAG-20H17  
ctg1022□ctg2406□ctg2304□WAG-21M20  
ctg1022□ctg2406□ctg2304□WAG-32H16  
ctg1023□□□WAG-31P8  
ctg1023□ctg2408□ctg2307□WAG-9P4  
ctg1023□ctg2408□ctg2307□WAG-22G22  
ctg1023□ctg2408□ctg2307□WAG-77F2  
ctg1023□ctg2408□ctg2307□WAG-121N17  
ctg1024□□□WAG-37K2  
ctg1024□ctg2121□ctg2660□WAG-44F9  
ctg1024□ctg2121□ctg2660□WAG-64O18  
ctg1024□ctg2121□ctg2660□WAG-74N12  
ctg1024□ctg2121□ctg2660□WAG-76G23  
ctg1024□ctg2121□ctg2660□WAG-96D9  
ctg1025□ctg2489□ctg2856□WAG-50B23  
ctg1025□ctg2489□ctg2856□WAG-73A3  
ctg1025□ctg2489□ctg2856□WAG-95D3  
ctg1025□ctg2489□ctg2856□WAG-104C16  
ctg1025□ctg2489□ctg2856□WAG-129I21  
ctg1026□ctg2071□ctg2513□WAG-35P9  
ctg1026□ctg2071□ctg2513□WAG-56K13  
ctg1026□ctg2071□ctg2513□WAG-128G5  
ctg1026□ctg2071□ctg6297□WAG-107N9  
ctg1026□ctg2071□ctg6297□WAG-122L23  
ctg1027□□□WAG-14O21  
ctg1027□□□WAG-106B20  
ctg1027□ctg2453□ctg2697□WAG-31J15  
ctg1027□ctg2453□ctg2697□WAG-73J6  
ctg1027□ctg2453□ctg2697□WAG-95L1  
ctg1027□ctg2453□ctg2697□WAG-108E11  
ctg1027□ctg2453□ctg2697□WAG-117J13  
ctg1027□ctg2453□ctg4017□WAG-45I24  
ctg1027□ctg2453□ctg4017□WAG-82P7

ctg1027□ctg2453□ctg4017□WAG-100J1  
ctg1027□ctg3718□ctg3936□WAG-17O15  
ctg1027□ctg3718□ctg3936□WAG-64I9  
ctg1027□ctg3718□ctg3936□WAG-97F5  
ctg1027□ctg4645□□WAG-1K24  
ctg1027□ctg4645□□WAG-27K17  
ctg1027□ctg4645□□WAG-59H1  
ctg1028□□□WAG-9E8  
ctg1028□ctg2699□ctg3000□WAG-9N11  
ctg1028□ctg2699□ctg3000□WAG-101C7  
ctg1028□ctg2699□ctg3000□WAG-118K2  
ctg1028□ctg2699□ctg3000□WAG-119G2  
ctg1029□□□WAG-26G5  
ctg1029□□□WAG-44F20  
ctg1029□□□WAG-79J23  
ctg1029□□□WAG-107N16  
ctg1029□ctg2499□□WAG-71E14  
ctg1029□ctg2499□□WAG-82L15  
ctg1029□ctg2499□□WAG-94E10  
ctg1029□ctg2499□ctg3005□WAG-44A22  
ctg1029□ctg2499□ctg3005□WAG-88A14  
ctg1029□ctg2746□ctg3503□WAG-16C24  
ctg1029□ctg2746□ctg3503□WAG-46L13  
ctg1029□ctg2746□ctg3503□WAG-65N17  
ctg1029□ctg2746□ctg3503□WAG-96K22  
ctg1029□ctg2746□ctg3503□WAG-130E11  
ctg103□ctg485□□WAG-68F23  
ctg103□ctg485□ctg393□WAG-16N19  
ctg103□ctg485□ctg393□WAG-21E12  
ctg103□ctg485□ctg393□WAG-22E4  
ctg103□ctg485□ctg393□WAG-48G24  
ctg103□ctg485□ctg393□WAG-49M2  
ctg103□ctg485□ctg393□WAG-86B4  
ctg103□ctg485□ctg393□WAG-107K20  
ctg103□ctg485□ctg393□WAG-129K23  
ctg1030□ctg2078□ctg1933□WAG-29K5  
ctg1030□ctg2078□ctg1933□WAG-49C12  
ctg1030□ctg2078□ctg1933□WAG-85P15  
ctg1030□ctg2078□ctg1933□WAG-92L24  
ctg1031□□□WAG-16N2  
ctg1031□ctg2291□ctg2194□WAG-51D18  
ctg1031□ctg2291□ctg2194□WAG-60D22  
ctg1031□ctg2291□ctg2194□WAG-61I6  
ctg1031□ctg2291□ctg2194□WAG-85E6  
ctg1031□ctg2291□ctg2194□WAG-94M4  
ctg1031□ctg5077□ctg5629□WAG-7O22  
ctg1031□ctg5077□ctg5629□WAG-47M23  
ctg1032□□□WAG-18O17  
ctg1032□□□WAG-29P11  
ctg1032□□□WAG-45O12  
ctg1032□□□WAG-87K22  
ctg1032□□□WAG-94H11  
ctg1032□ctg2505□ctg2949□WAG-13D23  
ctg1032□ctg2505□ctg2949□WAG-117M18  
ctg1032□ctg2505□ctg2949□WAG-120E11  
ctg1032□ctg2505□ctg6390□WAG-68A10

ctg1032□ctg2505□ctg6390□WAG-87O8  
ctg1032□ctg3133□ctg3141□WAG-75E6  
ctg1032□ctg3133□ctg3141□WAG-81P13  
ctg1032□ctg3133□ctg3141□WAG-112M8  
ctg1033□ctg2507□□WAG-83N10  
ctg1033□ctg2507□ctg2430□WAG-38D20  
ctg1033□ctg2507□ctg2430□WAG-66I20  
ctg1033□ctg2507□ctg2430□WAG-130M23  
ctg1034□□□WAG-29A8  
ctg1034□ctg2508□□WAG-64O19  
ctg1034□ctg2508□ctg2431□WAG-27L21  
ctg1034□ctg2508□ctg2431□WAG-56G9  
ctg1034□ctg2508□ctg2431□WAG-118L9  
ctg1035□ctg2081□ctg1941□WAG-9F22  
ctg1035□ctg2081□ctg1941□WAG-55F7  
ctg1035□ctg2081□ctg1941□WAG-56G21  
ctg1035□ctg2081□ctg1941□WAG-60P19  
ctg1036□□□WAG-41M23  
ctg1036□□□WAG-89P20  
ctg1036□□□WAG-124K17  
ctg1036□ctg2938□ctg2912□WAG-29O19  
ctg1036□ctg2938□ctg2912□WAG-50G15  
ctg1036□ctg2938□ctg2912□WAG-86H11  
ctg1036□ctg5260□ctg6066□WAG-68B11  
ctg1036□ctg5260□ctg6066□WAG-122C5  
ctg1037□ctg2085□ctg2294□WAG-5A15  
ctg1037□ctg2085□ctg2294□WAG-8A20  
ctg1037□ctg2085□ctg2294□WAG-57J13  
ctg1037□ctg2085□ctg2294□WAG-71B21  
ctg1037□ctg2085□ctg2294□WAG-107J20  
ctg1037□ctg2085□ctg5916□WAG-68K16  
ctg1037□ctg2085□ctg5916□WAG-70J6  
ctg1037□ctg2085□ctg6363□WAG-17H2  
ctg1037□ctg2085□ctg6363□WAG-118L6  
ctg1038□ctg2231□□WAG-4J17  
ctg1038□ctg2231□□WAG-26K21  
ctg1038□ctg2231□□WAG-112H23  
ctg1038□ctg2231□ctg3042□WAG-76I21  
ctg1038□ctg2231□ctg3042□WAG-81K7  
ctg1038□ctg2231□ctg3042□WAG-93B16  
ctg1038□ctg5115□ctg5731□WAG-50O24  
ctg1038□ctg5115□ctg5731□WAG-106B8  
ctg1039□□□WAG-54M11  
ctg1039□□□WAG-110K17  
ctg1039□ctg2088□ctg1947□WAG-12E17  
ctg1039□ctg2088□ctg1947□WAG-63H1  
ctg1039□ctg2088□ctg1947□WAG-79A21  
ctg1039□ctg2088□ctg1947□WAG-81K9  
ctg1039□ctg2088□ctg1947□WAG-87J21  
ctg104□□□WAG-2D12  
ctg104□□□WAG-11A22  
ctg104□□□WAG-54O19  
ctg104□ctg397□□WAG-85J24  
ctg104□ctg397□ctg308□WAG-43C10  
ctg104□ctg397□ctg308□WAG-45D15  
ctg104□ctg397□ctg308□WAG-72P1

ctg104□ctg397□ctg308□WAG-90H8  
ctg104□ctg397□ctg308□WAG-117O1  
ctg104□ctg397□ctg308□WAG-121M20  
ctg1040□ctg2093□□WAG-2F9  
ctg1040□ctg2093□ctg2568□WAG-7M12  
ctg1040□ctg2093□ctg2568□WAG-38G22  
ctg1040□ctg2093□ctg2568□WAG-45G11  
ctg1041□□□WAG-84O23  
ctg1041□ctg2094□ctg1953□WAG-64I17  
ctg1041□ctg2094□ctg1953□WAG-72B21  
ctg1041□ctg2094□ctg1953□WAG-85P2  
ctg1042□□□WAG-16L21  
ctg1042□ctg2341□□WAG-98E12  
ctg1042□ctg2341□ctg2244□WAG-3E12  
ctg1042□ctg2341□ctg2244□WAG-48C20  
ctg1042□ctg2341□ctg2244□WAG-71K22  
ctg1042□ctg2341□ctg2244□WAG-78F11  
ctg1042□ctg2341□ctg2244□WAG-82D12  
ctg1043□ctg2096□ctg1957□WAG-28K9  
ctg1043□ctg2096□ctg1957□WAG-74D18  
ctg1043□ctg2096□ctg1957□WAG-86E10  
ctg1043□ctg2096□ctg1957□WAG-119D6  
ctg1044□□□WAG-126J9  
ctg1044□ctg2691□□WAG-6M3  
ctg1044□ctg2691□□WAG-103B18  
ctg1044□ctg2691□ctg3416□WAG-13K21  
ctg1044□ctg2691□ctg3416□WAG-34L2  
ctg1044□ctg2691□ctg3416□WAG-113K9  
ctg1044□ctg2691□ctg3416□WAG-118P19  
ctg1044□ctg2691□ctg6565□WAG-57G4  
ctg1044□ctg2691□ctg6565□WAG-90K10  
ctg1045□ctg2098□ctg2098□WAG-24D5  
ctg1045□ctg2098□ctg2098□WAG-37E22  
ctg1045□ctg2098□ctg2098□WAG-55P2  
ctg1045□ctg2098□ctg2098□WAG-57N13  
ctg1046□ctg3053□ctg3976□WAG-15F16  
ctg1046□ctg3053□ctg3976□WAG-18I22  
ctg1046□ctg3053□ctg3976□WAG-26N21  
ctg1046□ctg3053□ctg3976□WAG-41E8  
ctg1046□ctg4549□□WAG-71F7  
ctg1046□ctg4549□ctg6919□WAG-100K5  
ctg1046□ctg4549□ctg6919□WAG-120D8  
ctg1047□□□WAG-114K20  
ctg1047□ctg2728□ctg3052□WAG-43C2  
ctg1047□ctg2728□ctg3052□WAG-43O15  
ctg1047□ctg2728□ctg3052□WAG-60F5  
ctg1047□ctg2728□ctg3052□WAG-73G23  
ctg1048□ctg2456□□WAG-20O23  
ctg1048□ctg2456□□WAG-81G1  
ctg1048□ctg2456□ctg3617□WAG-47G18  
ctg1048□ctg2456□ctg3617□WAG-57P18  
ctg1048□ctg2456□ctg3617□WAG-101B10  
ctg1048□ctg2456□ctg6006□WAG-10L9  
ctg1048□ctg2456□ctg6006□WAG-101A20  
ctg1048□ctg4688□ctg4862□WAG-57G6  
ctg1048□ctg4688□ctg4862□WAG-84D17



ctg1049□ctg2107□ctg1970□WAG-37P15  
ctg1049□ctg2107□ctg1970□WAG-49F7  
ctg1049□ctg2107□ctg1970□WAG-50D12  
ctg1049□ctg2107□ctg1970□WAG-128N15  
ctg105□□□WAG-10J13  
ctg105□□□WAG-38N24  
ctg105□□□WAG-64P16  
ctg105□ctg346□□WAG-22C21  
ctg105□ctg346□ctg255□WAG-11H21  
ctg105□ctg346□ctg255□WAG-34M11  
ctg105□ctg346□ctg255□WAG-49J17  
ctg105□ctg346□ctg255□WAG-92I3  
ctg105□ctg346□ctg255□WAG-115E3  
ctg105□ctg346□ctg255□WAG-115O22  
ctg105□ctg346□ctg255□WAG-128C6  
ctg1050□□□WAG-23I8  
ctg1050□□□WAG-107L19  
ctg1050□ctg2463□□WAG-26E17  
ctg1050□ctg2463□ctg3607□WAG-22A6  
ctg1050□ctg2463□ctg3607□WAG-65H6  
ctg1050□ctg2463□ctg3607□WAG-99H12  
ctg1050□ctg2463□ctg3607□WAG-103L4  
ctg1051□□□WAG-32F15  
ctg1051□□□WAG-38O15  
ctg1051□ctg2868□□WAG-57P24  
ctg1051□ctg2868□ctg2860□WAG-97A1  
ctg1051□ctg2868□ctg2860□WAG-116E6  
ctg1051□ctg2868□ctg2860□WAG-118A16  
ctg1051□ctg2918□ctg3990□WAG-91L22  
ctg1051□ctg2918□ctg3990□WAG-92J20  
ctg1051□ctg2918□ctg3990□WAG-110H23  
ctg1051□ctg2918□ctg4701□WAG-66H19  
ctg1051□ctg2918□ctg4701□WAG-112G1  
ctg1052□ctg2110□ctg1975□WAG-36B2  
ctg1052□ctg2110□ctg1975□WAG-42F18  
ctg1052□ctg2110□ctg1975□WAG-112N7  
ctg1053□□□WAG-9O20  
ctg1053□□□WAG-61D24  
ctg1053□ctg2468□□WAG-73O7  
ctg1053□ctg2468□ctg2390□WAG-22I22  
ctg1053□ctg2468□ctg2390□WAG-50E12  
ctg1053□ctg2468□ctg2390□WAG-65L3  
ctg1054□□□WAG-1N6  
ctg1054□□□WAG-1N7  
ctg1054□ctg2113□ctg1977□WAG-3C15  
ctg1054□ctg2113□ctg1977□WAG-18O4  
ctg1054□ctg2113□ctg1977□WAG-63E21  
ctg1054□ctg2113□ctg1977□WAG-114B23  
ctg1055□□□WAG-127B22  
ctg1055□ctg2473□□WAG-102N13  
ctg1055□ctg2473□ctg3086□WAG-14N1  
ctg1055□ctg2473□ctg3086□WAG-28C15  
ctg1055□ctg2473□ctg3086□WAG-121D20  
ctg1055□ctg2473□ctg4925□WAG-82F5  
ctg1055□ctg2473□ctg4925□WAG-90F19  
ctg1056□□□WAG-99D14

ctg1056□ctg2118□ctg1987□WAG-20L8  
ctg1056□ctg2118□ctg1987□WAG-40D2  
ctg1056□ctg2118□ctg1987□WAG-61A2  
ctg1056□ctg2118□ctg1987□WAG-66J19  
ctg1057□ctg2715□ctg3606□WAG-30I2  
ctg1057□ctg2715□ctg3606□WAG-54I3  
ctg1057□ctg2715□ctg3606□WAG-103I17  
ctg1057□ctg2715□ctg3606□WAG-124C10  
ctg1057□ctg6503□□WAG-8A19  
ctg1057□ctg6503□□WAG-14C15  
ctg1058□ctg2123□□WAG-10A10  
ctg1058□ctg2123□□WAG-43E12  
ctg1058□ctg2123□ctg2459□WAG-68C18  
ctg1058□ctg2123□ctg2459□WAG-73H11  
ctg1058□ctg2123□ctg2459□WAG-117F3  
ctg1059□ctg2125□□WAG-35N2  
ctg1059□ctg2125□ctg2604□WAG-34O7  
ctg1059□ctg2125□ctg2604□WAG-43A11  
ctg1059□ctg2125□ctg2604□WAG-92H4  
ctg1059□ctg2125□ctg6872□WAG-84A21  
ctg1059□ctg2125□ctg6872□WAG-98I20  
ctg106□□□WAG-105P9  
ctg106□ctg352□□WAG-8D21  
ctg106□ctg352□ctg337□WAG-21A6  
ctg106□ctg352□ctg337□WAG-24A19  
ctg106□ctg352□ctg337□WAG-29O22  
ctg106□ctg352□ctg337□WAG-38N14  
ctg106□ctg352□ctg337□WAG-45M4  
ctg106□ctg352□ctg337□WAG-51I24  
ctg106□ctg352□ctg337□WAG-52D3  
ctg106□ctg352□ctg337□WAG-55B14  
ctg106□ctg352□ctg337□WAG-71C24  
ctg106□ctg352□ctg337□WAG-74M22  
ctg106□ctg352□ctg337□WAG-107B4  
ctg106□ctg352□ctg337□WAG-111B23  
ctg1060□□□WAG-84O12  
ctg1060□ctg2482□ctg3225□WAG-53D1  
ctg1060□ctg2482□ctg3225□WAG-87H5  
ctg1060□ctg2482□ctg3225□WAG-100E21  
ctg1060□ctg2482□ctg5042□WAG-39N5  
ctg1060□ctg2482□ctg5042□WAG-44I11  
ctg1060□ctg5533□ctg6665□WAG-21J15  
ctg1060□ctg5533□ctg6665□WAG-119F2  
ctg1061□ctg2130□□WAG-26O22  
ctg1061□ctg2130□□WAG-49E7  
ctg1061□ctg2130□□WAG-108F23  
ctg1061□ctg2130□ctg2528□WAG-26H5  
ctg1061□ctg2130□ctg2528□WAG-107I11  
ctg1061□ctg2130□ctg2528□WAG-114D18  
ctg1061□ctg2130□ctg4480□WAG-41J3  
ctg1061□ctg2130□ctg4480□WAG-77E24  
ctg1062□ctg2133□□WAG-64N24  
ctg1062□ctg2133□ctg2709□WAG-38B11  
ctg1062□ctg2133□ctg2709□WAG-48P21  
ctg1062□ctg2133□ctg2709□WAG-92H16  
ctg1063□ctg2488□ctg3230□WAG-17G5

ctg1063□ctg2488□ctg3230□WAG-110C20  
ctg1063□ctg2488□ctg3230□WAG-129K20  
ctg1063□ctg2488□ctg4987□WAG-1B4  
ctg1063□ctg2488□ctg4987□WAG-56J17  
ctg1064□□□WAG-6J15  
ctg1064□ctg3013□□WAG-1M21  
ctg1064□ctg3013□□WAG-12F19  
ctg1064□ctg3013□□WAG-106B23  
ctg1064□ctg3013□ctg5125□WAG-1L22  
ctg1064□ctg3013□ctg5125□WAG-7I4  
ctg1065□ctg2571□□WAG-45H17  
ctg1065□ctg2571□□WAG-80L14  
ctg1065□ctg2571□□WAG-104N21  
ctg1065□ctg2571□ctg4218□WAG-60N6  
ctg1065□ctg2571□ctg4218□WAG-67F11  
ctg1066□ctg2138□ctg2012□WAG-15B17  
ctg1066□ctg2138□ctg2012□WAG-81L6  
ctg1066□ctg2138□ctg2012□WAG-118B18  
ctg1067□ctg2139□□WAG-113K6  
ctg1067□ctg2139□ctg2013□WAG-25J10  
ctg1067□ctg2139□ctg2013□WAG-36I11  
ctg1067□ctg2139□ctg2013□WAG-61A21  
ctg1068□ctg2503□□WAG-44O12  
ctg1068□ctg2503□□WAG-76N22  
ctg1068□ctg2503□ctg3125□WAG-33H2  
ctg1068□ctg2503□ctg3125□WAG-65H17  
ctg1068□ctg2503□ctg3125□WAG-68F12  
ctg1068□ctg6110□□WAG-13H4  
ctg1068□ctg6110□□WAG-91G5  
ctg1069□□□WAG-13K4  
ctg1069□□□WAG-118H19  
ctg1069□ctg2357□□WAG-13F10  
ctg1069□ctg2357□□WAG-48G9  
ctg1069□ctg2357□□WAG-68G17  
ctg1069□ctg2357□ctg4019□WAG-72A20  
ctg1069□ctg2357□ctg4019□WAG-116D4  
ctg1069□ctg2357□ctg4019□WAG-125C6  
ctg107□□□WAG-36C3  
ctg107□ctg353□□WAG-8E2  
ctg107□ctg353□ctg259□WAG-2D13  
ctg107□ctg353□ctg259□WAG-19F17  
ctg107□ctg353□ctg259□WAG-33J20  
ctg107□ctg353□ctg259□WAG-44O18  
ctg107□ctg353□ctg259□WAG-66P4  
ctg107□ctg353□ctg259□WAG-88P17  
ctg107□ctg353□ctg259□WAG-94J2  
ctg107□ctg353□ctg259□WAG-122L10  
ctg1070□□□WAG-116D11  
ctg1070□ctg2681□ctg2649□WAG-77N14  
ctg1070□ctg2681□ctg2649□WAG-101H5  
ctg1070□ctg2681□ctg2649□WAG-103F11  
ctg1070□ctg4115□□WAG-25M5  
ctg1070□ctg4115□ctg6292□WAG-6C10  
ctg1070□ctg4115□ctg6292□WAG-39N2  
ctg1071□ctg2146□ctg6143□WAG-34A20  
ctg1071□ctg2146□ctg6143□WAG-35M4

ctg1071□ctg2146□ctg6234□WAG-34A8  
ctg1071□ctg2146□ctg6234□WAG-90P19  
ctg1071□ctg2146□ctg6238□WAG-15E15  
ctg1071□ctg2146□ctg6238□WAG-19P20  
ctg1072□ctg2147□ctg2023□WAG-41H1  
ctg1072□ctg2147□ctg2023□WAG-71P11  
ctg1072□ctg2147□ctg2023□WAG-72O9  
ctg1072□ctg2147□ctg2023□WAG-120G17  
ctg1073□□□WAG-5C8  
ctg1073□□□WAG-122M6  
ctg1073□□□WAG-126M2  
ctg1073□ctg3413□ctg3516□WAG-42A12  
ctg1073□ctg3413□ctg3516□WAG-66G12  
ctg1073□ctg6491□□WAG-16I14  
ctg1073□ctg6491□□WAG-56F14  
ctg1074□□□WAG-62A19  
ctg1074□ctg2163□□WAG-25B10  
ctg1074□ctg2163□□WAG-76L9  
ctg1074□ctg2163□□WAG-126K21  
ctg1074□ctg2163□ctg4266□WAG-21F10  
ctg1074□ctg2163□ctg4266□WAG-79K24  
ctg1074□ctg2163□ctg4266□WAG-110I4  
ctg1075□□□WAG-25K20  
ctg1075□□□WAG-67D14  
ctg1075□ctg3040□ctg3036□WAG-46B12  
ctg1075□ctg3040□ctg3036□WAG-62G21  
ctg1075□ctg3040□ctg3036□WAG-74B12  
ctg1075□ctg5797□□WAG-99D15  
ctg1075□ctg5797□□WAG-103N7  
ctg1076□□□WAG-110N15  
ctg1076□ctg2880□□WAG-93H3  
ctg1076□ctg2880□ctg3919□WAG-113E18  
ctg1076□ctg2880□ctg3919□WAG-121N18  
ctg1076□ctg3045□□WAG-49I7  
ctg1076□ctg3045□ctg3984□WAG-82K12  
ctg1076□ctg3045□ctg3984□WAG-86P15  
ctg1077□□□WAG-17L16  
ctg1077□ctg3056□ctg3053□WAG-77D21  
ctg1077□ctg3056□ctg3053□WAG-124N8  
ctg1077□ctg3056□ctg3053□WAG-129O14  
ctg1077□ctg3857□ctg4129□WAG-45B11  
ctg1077□ctg3857□ctg4129□WAG-128L12  
ctg1077□ctg3857□ctg5883□WAG-29D24  
ctg1077□ctg3857□ctg5883□WAG-122L19  
ctg1077□ctg4719□ctg4905□WAG-47N20  
ctg1077□ctg4719□ctg4905□WAG-59H12  
ctg1078□ctg2960□□WAG-126B24  
ctg1078□ctg2960□ctg3029□WAG-37H1  
ctg1078□ctg2960□ctg3029□WAG-50I12  
ctg1078□ctg2960□ctg3029□WAG-105D11  
ctg1078□ctg2960□ctg3029□WAG-125H12  
ctg1078□ctg2960□ctg5464□WAG-46L18  
ctg1078□ctg2960□ctg5464□WAG-119G19  
ctg1078□ctg2960□ctg6136□WAG-59O21  
ctg1078□ctg2960□ctg6136□WAG-85G16  
ctg1079□□□WAG-64L16

ctg1079□□□WAG-109J2  
ctg1079□ctg3149□ctg3166□WAG-55M10  
ctg1079□ctg3149□ctg3166□WAG-82J20  
ctg1079□ctg3149□ctg3166□WAG-119P11  
ctg1079□ctg5063□ctg5595□WAG-16A4  
ctg1079□ctg5063□ctg5595□WAG-50M10  
ctg108□□□WAG-40F23  
ctg108□ctg574□ctg1410□WAG-9H19  
ctg108□ctg574□ctg1410□WAG-25M21  
ctg108□ctg574□ctg1410□WAG-64P12  
ctg108□ctg574□ctg1410□WAG-95I16  
ctg108□ctg574□ctg1410□WAG-107M11  
ctg108□ctg574□ctg598□WAG-14I10  
ctg108□ctg574□ctg598□WAG-27H19  
ctg108□ctg574□ctg598□WAG-34O9  
ctg108□ctg574□ctg598□WAG-61K21  
ctg108□ctg574□ctg598□WAG-99N18  
ctg108□ctg6466□□WAG-74D22  
ctg108□ctg6466□□WAG-84G17  
ctg1080□□□WAG-113I11  
ctg1080□ctg2581□ctg3066□WAG-47M3  
ctg1080□ctg2581□ctg3066□WAG-74I13  
ctg1080□ctg2581□ctg3066□WAG-89K19  
ctg1080□ctg2581□ctg3066□WAG-110H15  
ctg1080□ctg2581□ctg3066□WAG-118N14  
ctg1080□ctg2581□ctg3066□WAG-120G10  
ctg1080□ctg2581□ctg4167□WAG-32D20  
ctg1080□ctg2581□ctg4167□WAG-38F5  
ctg1080□ctg2581□ctg4167□WAG-124F12  
ctg1081□ctg2550□□WAG-1A23  
ctg1081□ctg2550□ctg4334□WAG-26P12  
ctg1081□ctg2550□ctg4334□WAG-103F8  
ctg1081□ctg2550□ctg4334□WAG-108H16  
ctg1081□ctg2550□ctg5988□WAG-58H13  
ctg1081□ctg2550□ctg5988□WAG-125A1  
ctg1082□ctg2187□□WAG-83E19  
ctg1082□ctg2187□ctg2669□WAG-2O20  
ctg1082□ctg2187□ctg2669□WAG-62K3  
ctg1082□ctg2187□ctg2669□WAG-86K12  
ctg1082□ctg2187□ctg2669□WAG-123C24  
ctg1083□ctg2191□ctg3590□WAG-3N13  
ctg1083□ctg2191□ctg3590□WAG-16P5  
ctg1083□ctg2191□ctg3590□WAG-91C24  
ctg1083□ctg2191□ctg3590□WAG-102G16  
ctg1083□ctg2191□ctg3590□WAG-111O4  
ctg1084□□□WAG-27D16  
ctg1084□ctg2620□ctg2740□WAG-10C15  
ctg1084□ctg2620□ctg2740□WAG-76C7  
ctg1084□ctg2620□ctg2740□WAG-89J22  
ctg1084□ctg2620□ctg3688□WAG-95I3  
ctg1084□ctg2620□ctg3688□WAG-115L13  
ctg1084□ctg2620□ctg3688□WAG-128P12  
ctg1085□□□WAG-65O16  
ctg1085□ctg2493□ctg2478□WAG-10O7  
ctg1085□ctg2493□ctg2478□WAG-35M3  
ctg1085□ctg2493□ctg2478□WAG-112P20

ctg1085□ctg2493□ctg2478□WAG-113J2  
ctg1086□□□WAG-3O22  
ctg1086□□□WAG-27D18  
ctg1086□□□WAG-50L19  
ctg1086□□□WAG-73N2  
ctg1086□ctg2630□ctg3316□WAG-57N15  
ctg1086□ctg2630□ctg3316□WAG-61B9  
ctg1086□ctg2630□ctg3316□WAG-69D13  
ctg1086□ctg2630□ctg3316□WAG-79P19  
ctg1086□ctg2630□ctg3316□WAG-81H22  
ctg1086□ctg4310□□□WAG-99P17  
ctg1086□ctg4310□ctg6313□WAG-16J24  
ctg1086□ctg4310□ctg6313□WAG-86D14  
ctg1087□□□WAG-99B23  
ctg1087□ctg2966□□□WAG-52L19  
ctg1087□ctg2966□□□WAG-85A7  
ctg1087□ctg2966□ctg3854□WAG-83N4  
ctg1087□ctg2966□ctg3854□WAG-84M9  
ctg1087□ctg2966□ctg3854□WAG-113M9  
ctg1087□ctg2966□ctg3952□WAG-23L19  
ctg1087□ctg2966□ctg3952□WAG-35H24  
ctg1087□ctg2966□ctg3952□WAG-36I24  
ctg1087□ctg2966□ctg3952□WAG-77J19  
ctg1087□ctg3430□ctg3538□WAG-62E4  
ctg1087□ctg3430□ctg3538□WAG-73H22  
ctg1087□ctg3430□ctg3538□WAG-118G8  
ctg1087□ctg4372□□□WAG-44B2  
ctg1087□ctg4372□ctg6325□WAG-65J15  
ctg1087□ctg4372□ctg6325□WAG-76E15  
ctg1088□ctg2644□ctg2605□WAG-11I13  
ctg1088□ctg2644□ctg2605□WAG-50G11  
ctg1088□ctg2644□ctg2605□WAG-54P11  
ctg1088□ctg2644□ctg2605□WAG-114N4  
ctg1088□ctg5313□ctg6189□WAG-113J20  
ctg1088□ctg5313□ctg6189□WAG-116F9  
ctg1089□ctg3099□□□WAG-82K15  
ctg1089□ctg3099□ctg3098□WAG-11L3  
ctg1089□ctg3099□ctg3098□WAG-25I9  
ctg1089□ctg3099□ctg3098□WAG-78C22  
ctg1089□ctg3099□ctg3098□WAG-99E13  
ctg1089□ctg3099□ctg3098□WAG-120F23  
ctg1089□ctg4160□□□WAG-123H5  
ctg1089□ctg4160□ctg4399□WAG-82C24  
ctg1089□ctg4160□ctg4399□WAG-93D20  
ctg109□□□WAG-2J11  
ctg109□ctg356□ctg371□WAG-25J20  
ctg109□ctg356□ctg371□WAG-28D20  
ctg109□ctg356□ctg371□WAG-42M11  
ctg109□ctg356□ctg371□WAG-66J8  
ctg109□ctg356□ctg371□WAG-79M13  
ctg109□ctg356□ctg371□WAG-100F2  
ctg109□ctg356□ctg371□WAG-114P9  
ctg109□ctg356□ctg371□WAG-130C15  
ctg1090□ctg2569□ctg3280□WAG-47K1  
ctg1090□ctg2569□ctg3280□WAG-48A11  
ctg1090□ctg2569□ctg3280□WAG-76G6

ctg1090□ctg2569□ctg6226□WAG-10O2  
ctg1090□ctg2569□ctg6226□WAG-74M6  
ctg1090□ctg4184□□WAG-99K7  
ctg1090□ctg4184□ctg6567□WAG-43A24  
ctg1090□ctg4184□ctg6567□WAG-55D7  
ctg1090□ctg5459□ctg6521□WAG-15P9  
ctg1090□ctg5459□ctg6521□WAG-100N5  
ctg1091□□□WAG-33A13  
ctg1091□ctg2798□ctg2793□WAG-25C8  
ctg1091□ctg2798□ctg2793□WAG-52I21  
ctg1091□ctg2798□ctg2793□WAG-61G9  
ctg1091□ctg2798□ctg2793□WAG-108F20  
ctg1091□ctg2798□ctg2793□WAG-110L4  
ctg1091□ctg2798□ctg2793□WAG-123P21  
ctg1091□ctg2798□ctg2793□WAG-126E21  
ctg1092□□□WAG-10F9  
ctg1092□□□WAG-63O1  
ctg1092□□□WAG-102O18  
ctg1092□□□WAG-117H10  
ctg1092□□□WAG-126I7  
ctg1092□ctg3109□□WAG-70K15  
ctg1092□ctg3109□□WAG-71C9  
ctg1092□ctg3109□ctg4080□WAG-7P5  
ctg1092□ctg3109□ctg4080□WAG-38E18  
ctg1092□ctg3109□ctg4080□WAG-59I7  
ctg1092□ctg3109□ctg4080□WAG-65K4  
ctg1092□ctg3109□ctg4080□WAG-91K23  
ctg1092□ctg5835□□WAG-58A17  
ctg1092□ctg5835□□WAG-84L15  
ctg1093□ctg2204□ctg2491□WAG-43E6  
ctg1093□ctg2204□ctg2491□WAG-44J3  
ctg1093□ctg2204□ctg2491□WAG-58M3  
ctg1093□ctg2204□ctg2491□WAG-59G20  
ctg1094□□□WAG-8B16  
ctg1094□ctg2578□□WAG-79L17  
ctg1094□ctg2578□□WAG-82I24  
ctg1094□ctg2578□ctg5755□WAG-69P17  
ctg1094□ctg2578□ctg5755□WAG-74O3  
ctg1094□ctg2578□ctg6790□WAG-68E3  
ctg1094□ctg2578□ctg6790□WAG-105D8  
ctg1094□ctg3135□□WAG-75H21  
ctg1094□ctg3135□□WAG-126F11  
ctg1094□ctg3135□ctg4104□WAG-25N16  
ctg1094□ctg3135□ctg4104□WAG-84C12  
ctg1094□ctg3135□ctg4104□WAG-84E9  
ctg1094□ctg3135□ctg4104□WAG-91D22  
ctg1095□□□WAG-2G3  
ctg1095□ctg3814□□WAG-50L10  
ctg1095□ctg3814□□WAG-112C17  
ctg1095□ctg3814□ctg5396□WAG-61O9  
ctg1095□ctg3814□ctg5396□WAG-87P1  
ctg1095□ctg5859□□WAG-72M24  
ctg1095□ctg5859□□WAG-116G5  
ctg1096□ctg2651□□WAG-111I24  
ctg1096□ctg2651□ctg2618□WAG-40C10  
ctg1096□ctg2651□ctg2618□WAG-70D20

ctg1096□ctg2651□ctg2618□WAG-85I21  
ctg1097□□□WAG-81P3  
ctg1097□ctg2653□□WAG-9C5  
ctg1097□ctg2653□□WAG-9J4  
ctg1097□ctg2653□ctg3135□WAG-78O4  
ctg1097□ctg2653□ctg3135□WAG-88N12  
ctg1097□ctg2653□ctg3135□WAG-97N5  
ctg1098□□□WAG-50A7  
ctg1098□ctg2654□ctg3423□WAG-10K4  
ctg1098□ctg2654□ctg3423□WAG-49E8  
ctg1098□ctg2654□ctg3423□WAG-77D24  
ctg1098□ctg2654□ctg3423□WAG-128O9  
ctg1098□ctg4152□□WAG-20J3  
ctg1098□ctg4152□□WAG-89K14  
ctg1098□ctg4152□□WAG-124K6  
ctg1098□ctg4152□ctg5903□WAG-73B5  
ctg1098□ctg4152□ctg5903□WAG-89F14  
ctg1099□ctg2211□ctg2089□WAG-40E13  
ctg1099□ctg2211□ctg2089□WAG-41L10  
ctg1099□ctg2211□ctg2089□WAG-48K4  
ctg1099□ctg2211□ctg2089□WAG-84G7  
ctg11□□□WAG-130H7  
ctg11□ctg49□ctg47□WAG-8F15  
ctg11□ctg49□ctg47□WAG-29H13  
ctg11□ctg49□ctg47□WAG-50F9  
ctg11□ctg49□ctg47□WAG-69D24  
ctg11□ctg49□ctg47□WAG-89A13  
ctg11□ctg49□ctg47□WAG-89E11  
ctg11□ctg49□ctg47□WAG-93H10  
ctg11□ctg49□ctg47□WAG-103H23  
ctg11□ctg49□ctg47□WAG-113A5  
ctg11□ctg49□ctg47□WAG-119E16  
ctg11□ctg49□ctg47□WAG-128P17  
ctg110□□□WAG-64M4  
ctg110□ctg2634□ctg3325□WAG-47M10  
ctg110□ctg2634□ctg3325□WAG-79C7  
ctg110□ctg2634□ctg3325□WAG-102D11  
ctg110□ctg2634□ctg3325□WAG-116I9  
ctg110□ctg592□□WAG-16E6  
ctg110□ctg592□□WAG-38I10  
ctg110□ctg592□ctg775□WAG-16C10  
ctg110□ctg592□ctg775□WAG-28P15  
ctg110□ctg592□ctg775□WAG-45J5  
ctg110□ctg592□ctg775□WAG-55D20  
ctg110□ctg592□ctg775□WAG-122A10  
ctg110□ctg592□ctg775□WAG-124P17  
ctg110□ctg762□□WAG-46I16  
ctg110□ctg762□□WAG-60C14  
ctg110□ctg762□ctg2408□WAG-37P7  
ctg110□ctg762□ctg2408□WAG-42E6  
ctg110□ctg762□ctg2408□WAG-46I8  
ctg110□ctg762□ctg2408□WAG-60H6  
ctg110□ctg762□ctg5562□WAG-35F5  
ctg110□ctg762□ctg5562□WAG-114M22  
ctg110□ctg762□ctg855□WAG-54L10  
ctg110□ctg762□ctg855□WAG-61M7



ctg110□ctg762□ctg855□WAG-67A9  
ctg110□ctg762□ctg855□WAG-67M7  
ctg110□ctg762□ctg855□WAG-102J23  
ctg110□ctg762□ctg855□WAG-113M10  
ctg1100□□□WAG-34I23  
ctg1100□ctg2637□□WAG-26E21  
ctg1100□ctg2637□□WAG-125D3  
ctg1100□ctg2637□ctg5479□WAG-114B18  
ctg1100□ctg2637□ctg5479□WAG-128N4  
ctg1100□ctg2637□ctg5797□WAG-50N22  
ctg1100□ctg2637□ctg5797□WAG-78M8  
ctg1101□ctg3120□ctg3119□WAG-54O10  
ctg1101□ctg3120□ctg3119□WAG-66D12  
ctg1101□ctg3120□ctg3119□WAG-100K13  
ctg1101□ctg6266□□WAG-9O8  
ctg1101□ctg6266□□WAG-73C22  
ctg1102□□□WAG-67H13  
ctg1102□ctg2582□ctg2544□WAG-17I11  
ctg1102□ctg2582□ctg2544□WAG-57D15  
ctg1102□ctg2582□ctg2544□WAG-89K24  
ctg1103□ctg2584□□WAG-9K10  
ctg1103□ctg2584□□WAG-106H14  
ctg1103□ctg2584□ctg3367□WAG-2L12  
ctg1103□ctg2584□ctg3367□WAG-4G22  
ctg1103□ctg2584□ctg3367□WAG-5E15  
ctg1104□ctg2450□□WAG-122J16  
ctg1104□ctg2450□ctg3055□WAG-8M4  
ctg1104□ctg2450□ctg3055□WAG-46O9  
ctg1104□ctg2450□ctg3055□WAG-73F13  
ctg1104□ctg2450□ctg4366□WAG-68J5  
ctg1104□ctg2450□ctg4366□WAG-127I10  
ctg1105□ctg2215□□WAG-52E18  
ctg1105□ctg2215□ctg2620□WAG-76E21  
ctg1105□ctg2215□ctg2620□WAG-122D17  
ctg1105□ctg2215□ctg2620□WAG-122M20  
ctg1106□ctg2587□ctg3240□WAG-33B7  
ctg1106□ctg2587□ctg3240□WAG-34F6  
ctg1106□ctg2587□ctg3240□WAG-52A5  
ctg1106□ctg2587□ctg3240□WAG-78K18  
ctg1106□ctg2587□ctg3240□WAG-84I13  
ctg1107□ctg2216□□WAG-33F1  
ctg1107□ctg2216□□WAG-89E21  
ctg1107□ctg2216□□WAG-125D13  
ctg1107□ctg2216□ctg2814□WAG-36M12  
ctg1107□ctg2216□ctg2814□WAG-95I23  
ctg1107□ctg2216□ctg2814□WAG-105B14  
ctg1108□□□WAG-25D21  
ctg1108□□□WAG-79M24  
ctg1108□ctg2875□□WAG-56K22  
ctg1108□ctg2875□□WAG-65A5  
ctg1108□ctg2875□□WAG-101N21  
ctg1108□ctg2875□ctg6449□WAG-87O17  
ctg1108□ctg2875□ctg6449□WAG-112C14  
ctg1108□ctg2875□ctg6856□WAG-67G17  
ctg1108□ctg2875□ctg6856□WAG-128O21  
ctg1108□ctg2875□ctg6900□WAG-12A10

ctg1108□ctg2875□ctg6900□WAG-103F15  
ctg1108□ctg2875□ctg6948□WAG-4O16  
ctg1108□ctg2875□ctg6948□WAG-109F22  
ctg1109□ctg3136□ctg4262□WAG-7G11  
ctg1109□ctg3136□ctg4262□WAG-89A12  
ctg1109□ctg3136□ctg4689□WAG-30I24  
ctg1109□ctg3136□ctg4689□WAG-92J3  
ctg1109□ctg3299□□WAG-15D22  
ctg1109□ctg3299□ctg4477□WAG-1L20  
ctg1109□ctg3299□ctg4477□WAG-46O17  
ctg111□□□WAG-13M3  
ctg111□□□WAG-18F16  
ctg111□□□WAG-69K12  
ctg111□□□WAG-70A22  
ctg111□ctg498□□WAG-18B5  
ctg111□ctg498□ctg1127□WAG-2K6  
ctg111□ctg498□ctg1127□WAG-14K8  
ctg111□ctg498□ctg1127□WAG-17A22  
ctg111□ctg498□ctg1127□WAG-50M3  
ctg111□ctg498□ctg1127□WAG-74C5  
ctg111□ctg498□ctg1127□WAG-123H21  
ctg111□ctg498□ctg528□WAG-7C16  
ctg111□ctg498□ctg528□WAG-20G12  
ctg111□ctg498□ctg528□WAG-60J21  
ctg111□ctg498□ctg528□WAG-118D12  
ctg111□ctg498□ctg528□WAG-119N3  
ctg111□ctg498□ctg528□WAG-128J19  
ctg111□ctg604□□WAG-32D7  
ctg111□ctg604□□WAG-82J9  
ctg111□ctg604□ctg2287□WAG-44A23  
ctg111□ctg604□ctg2287□WAG-45N18  
ctg111□ctg604□ctg2287□WAG-100M17  
ctg111□ctg604□ctg2287□WAG-106G21  
ctg111□ctg604□ctg2869□WAG-32F20  
ctg111□ctg604□ctg2869□WAG-88P15  
ctg111□ctg604□ctg2869□WAG-118B17  
ctg111□ctg604□ctg801□WAG-26E12  
ctg111□ctg604□ctg801□WAG-43E17  
ctg111□ctg604□ctg801□WAG-44P16  
ctg111□ctg604□ctg801□WAG-49C4  
ctg111□ctg604□ctg801□WAG-66C21  
ctg111□ctg604□ctg801□WAG-90H22  
ctg1110□□□WAG-4L12  
ctg1110□□□WAG-86I5  
ctg1110□ctg3229□□WAG-2K1  
ctg1110□ctg3229□ctg3340□WAG-11A14  
ctg1110□ctg3229□ctg3340□WAG-23P14  
ctg1110□ctg3229□ctg3340□WAG-82M23  
ctg1110□ctg3229□ctg3340□WAG-88C22  
ctg1110□ctg4416□□WAG-71C14  
ctg1110□ctg4416□□WAG-88J4  
ctg1110□ctg4416□ctg6698□WAG-32O21  
ctg1110□ctg4416□ctg6698□WAG-76H9  
ctg1111□□□WAG-2K23  
ctg1111□□□WAG-30L13  
ctg1111□ctg2682□ctg2650□WAG-47I11

ctg1111□ctg2682□ctg2650□WAG-55B11  
ctg1111□ctg2682□ctg2650□WAG-86E9  
ctg1111□ctg2682□ctg6696□WAG-79N22  
ctg1111□ctg2682□ctg6696□WAG-81L9  
ctg1112□□□WAG-8N12  
ctg1112□□□WAG-40J2  
ctg1112□ctg2545□□WAG-110O7  
ctg1112□ctg2545□ctg3172□WAG-40N19  
ctg1112□ctg2545□ctg3172□WAG-91I8  
ctg1112□ctg2545□ctg3172□WAG-105C2  
ctg1112□ctg2545□ctg3172□WAG-109I5  
ctg1113□ctg2695□ctg2680□WAG-24I14  
ctg1113□ctg2695□ctg2680□WAG-79M18  
ctg1113□ctg2695□ctg2680□WAG-99O19  
ctg1113□ctg2695□ctg2680□WAG-112E6  
ctg1114□□□WAG-56N17  
ctg1114□ctg2235□ctg2136□WAG-59O4  
ctg1114□ctg2235□ctg2136□WAG-120P24  
ctg1114□ctg2235□ctg2136□WAG-124L20  
ctg1115□□□WAG-124I23  
ctg1115□ctg2697□□WAG-7O11  
ctg1115□ctg2697□□WAG-94I23  
ctg1115□ctg2697□□WAG-115C2  
ctg1115□ctg2697□ctg2890□WAG-47I20  
ctg1115□ctg2697□ctg2890□WAG-105M2  
ctg1115□ctg2697□ctg2890□WAG-112I13  
ctg1116□ctg2240□ctg2144□WAG-33P14  
ctg1116□ctg2240□ctg2144□WAG-90D24  
ctg1116□ctg2240□ctg2144□WAG-93N4  
ctg1117□□□WAG-25K9  
ctg1117□□□WAG-45A4  
ctg1117□ctg3605□□WAG-4L16  
ctg1117□ctg3605□ctg3784□WAG-15L16  
ctg1117□ctg3605□ctg3784□WAG-84B6  
ctg1117□ctg3605□ctg3784□WAG-105D21  
ctg1117□ctg5229□ctg5995□WAG-123F6  
ctg1117□ctg5229□ctg5995□WAG-124E8  
ctg1117□ctg5508□ctg6618□WAG-100D1  
ctg1117□ctg5508□ctg6618□WAG-111A18  
ctg1117□ctg6009□□WAG-24M16  
ctg1117□ctg6009□□WAG-75A20  
ctg1117□ctg6265□□WAG-12G16  
ctg1117□ctg6265□□WAG-122M24  
ctg1118□□□WAG-40D22  
ctg1118□□□WAG-71M24  
ctg1118□□□WAG-115M19  
ctg1118□ctg2645□□WAG-101J13  
ctg1118□ctg2645□ctg3462□WAG-34M15  
ctg1118□ctg2645□ctg3462□WAG-44D7  
ctg1118□ctg2645□ctg3462□WAG-80D3  
ctg1118□ctg4351□□WAG-85E4  
ctg1118□ctg4351□ctg6501□WAG-31N5  
ctg1118□ctg4351□ctg6501□WAG-48I3  
ctg1118□ctg4766□ctg4978□WAG-4N10  
ctg1118□ctg4766□ctg4978□WAG-48L9  
ctg1118□ctg6519□□WAG-3J20

ctg1118□ctg6519□□WAG-51K19  
ctg1119□□□WAG-21E5  
ctg1119□ctg2706□ctg2689□WAG-85G3  
ctg1119□ctg2706□ctg2689□WAG-89J2  
ctg1119□ctg2706□ctg2689□WAG-128L8  
ctg112□□□WAG-45A16  
ctg112□□□WAG-76D21  
ctg112□□□WAG-95L2  
ctg112□□□WAG-116L19  
ctg112□ctg499□□WAG-117J16  
ctg112□ctg499□ctg2460□WAG-13D9  
ctg112□ctg499□ctg2460□WAG-108J19  
ctg112□ctg499□ctg2460□WAG-119B17  
ctg112□ctg499□ctg5390□WAG-74J24  
ctg112□ctg499□ctg5390□WAG-95L3  
ctg112□ctg499□ctg550□WAG-23D17  
ctg112□ctg499□ctg550□WAG-27I11  
ctg112□ctg499□ctg550□WAG-37B24  
ctg112□ctg499□ctg550□WAG-48F15  
ctg112□ctg499□ctg550□WAG-55L15  
ctg112□ctg499□ctg550□WAG-76O3  
ctg112□ctg499□ctg550□WAG-96B19  
ctg112□ctg738□□WAG-75O17  
ctg112□ctg738□ctg1003□WAG-23B13  
ctg112□ctg738□ctg1003□WAG-38F3  
ctg112□ctg738□ctg1003□WAG-44N1  
ctg112□ctg738□ctg1003□WAG-61E16  
ctg112□ctg738□ctg1003□WAG-77C6  
ctg112□ctg738□ctg1003□WAG-77J8  
ctg112□ctg738□ctg1003□WAG-108N5  
ctg112□ctg738□ctg2124□WAG-29C16  
ctg112□ctg738□ctg2124□WAG-31L20  
ctg112□ctg738□ctg2124□WAG-59M4  
ctg112□ctg738□ctg2124□WAG-60F19  
ctg112□ctg738□ctg2124□WAG-75O9  
ctg112□ctg738□ctg2124□WAG-76P14  
ctg112□ctg738□ctg2124□WAG-99F2  
ctg1120□□□WAG-114M17  
ctg1120□ctg3076□ctg3076□WAG-11E13  
ctg1120□ctg3076□ctg3076□WAG-22E16  
ctg1120□ctg3076□ctg3076□WAG-26L8  
ctg1120□ctg3076□ctg3076□WAG-69K23  
ctg1120□ctg3076□ctg3076□WAG-103P12  
ctg1120□ctg3173□□WAG-48A15  
ctg1120□ctg3173□ctg4356□WAG-19L2  
ctg1120□ctg3173□ctg4356□WAG-72N21  
ctg1120□ctg3173□ctg4356□WAG-79C3  
ctg1121□ctg2898□□WAG-55L5  
ctg1121□ctg2898□ctg3108□WAG-15N23  
ctg1121□ctg2898□ctg3108□WAG-71A20  
ctg1121□ctg2898□ctg3108□WAG-112H12  
ctg1121□ctg2898□ctg5122□WAG-30J4  
ctg1121□ctg2898□ctg5122□WAG-30J6  
ctg1122□□□WAG-42M5  
ctg1122□□□WAG-75E15  
ctg1122□ctg3116□□WAG-78D1

ctg1122□ctg3116□ctg3391□WAG-17L2  
ctg1122□ctg3116□ctg3391□WAG-65G13  
ctg1122□ctg3116□ctg3391□WAG-119G10  
ctg1122□ctg6442□□WAG-24J13  
ctg1122□ctg6442□□WAG-45M2  
ctg1123□ctg2252□□WAG-64H9  
ctg1123□ctg2252□ctg2795□WAG-3L2  
ctg1123□ctg2252□ctg2795□WAG-5K9  
ctg1123□ctg2252□ctg2795□WAG-63A13  
ctg1123□ctg2252□ctg2795□WAG-116E18  
ctg1123□ctg2252□ctg5278□WAG-34N6  
ctg1123□ctg2252□ctg5278□WAG-107H17  
ctg1123□ctg5446□ctg6487□WAG-64N15  
ctg1123□ctg5446□ctg6487□WAG-109P19  
ctg1124□ctg2253□ctg2157□WAG-10P10  
ctg1124□ctg2253□ctg2157□WAG-62D19  
ctg1124□ctg2253□ctg2157□WAG-86A5  
ctg1124□ctg2253□ctg2157□WAG-129K10  
ctg1125□□□WAG-19E22  
ctg1125□□□WAG-77M8  
ctg1125□ctg3287□□WAG-84E10  
ctg1125□ctg3287□ctg4445□WAG-98D23  
ctg1125□ctg3287□ctg4445□WAG-107L6  
ctg1125□ctg3287□ctg5274□WAG-69D2  
ctg1125□ctg3287□ctg5274□WAG-117J21  
ctg1126□ctg2257□□WAG-77F17  
ctg1126□ctg2257□ctg2801□WAG-42E21  
ctg1126□ctg2257□ctg2801□WAG-72D9  
ctg1126□ctg2257□ctg2801□WAG-77C16  
ctg1127□□□WAG-37H16  
ctg1127□ctg2725□□WAG-79G2  
ctg1127□ctg2725□ctg3624□WAG-20I18  
ctg1127□ctg2725□ctg3624□WAG-76F10  
ctg1127□ctg2725□ctg3624□WAG-101D4  
ctg1127□ctg3423□ctg3527□WAG-49E15  
ctg1127□ctg3423□ctg3527□WAG-70G19  
ctg1127□ctg3423□ctg3527□WAG-99D6  
ctg1128□□□WAG-76B5  
ctg1128□□□WAG-101B21  
ctg1128□ctg2964□□WAG-40I16  
ctg1128□ctg2964□ctg3129□WAG-26G16  
ctg1128□ctg2964□ctg3129□WAG-88I6  
ctg1128□ctg2964□ctg3129□WAG-126F10  
ctg1128□ctg5684□□WAG-31E21  
ctg1128□ctg5684□□WAG-109E2  
ctg1129□□□WAG-8N2  
ctg1129□ctg2659□□WAG-56I5  
ctg1129□ctg2659□ctg4306□WAG-6M24  
ctg1129□ctg2659□ctg4306□WAG-32C16  
ctg1129□ctg2659□ctg4306□WAG-50D19  
ctg1129□ctg2659□ctg5312□WAG-29P14  
ctg1129□ctg2659□ctg5312□WAG-82K7  
ctg113□ctg419□□WAG-27D22  
ctg113□ctg419□ctg2713□WAG-66B20  
ctg113□ctg419□ctg2713□WAG-68N11  
ctg113□ctg419□ctg2713□WAG-86J3

ctg113□ctg419□ctg330□WAG-16L10  
ctg113□ctg419□ctg330□WAG-17K6  
ctg113□ctg419□ctg330□WAG-56G11  
ctg113□ctg419□ctg330□WAG-56G16  
ctg113□ctg419□ctg330□WAG-67E9  
ctg113□ctg419□ctg330□WAG-80G3  
ctg113□ctg419□ctg330□WAG-120E7  
ctg1130□□□WAG-35A11  
ctg1130□ctg2469□ctg2391□WAG-15F3  
ctg1130□ctg2469□ctg2391□WAG-19F13  
ctg1130□ctg2469□ctg2391□WAG-98J5  
ctg1130□ctg2469□ctg2391□WAG-129I15  
ctg1131□ctg2265□ctg2167□WAG-10A11  
ctg1131□ctg2265□ctg2167□WAG-14K17  
ctg1131□ctg2265□ctg2167□WAG-48J22  
ctg1131□ctg2265□ctg2167□WAG-62L23  
ctg1131□ctg2265□ctg6654□WAG-24D20  
ctg1131□ctg2265□ctg6654□WAG-41B15  
ctg1132□ctg2266□ctg2168□WAG-21L17  
ctg1132□ctg2266□ctg2168□WAG-25L13  
ctg1132□ctg2266□ctg2168□WAG-59J3  
ctg1133□□□WAG-102H18  
ctg1133□ctg2267□ctg2917□WAG-22C4  
ctg1133□ctg2267□ctg2917□WAG-49G16  
ctg1133□ctg2267□ctg2917□WAG-51N22  
ctg1133□ctg2267□ctg2917□WAG-96B1  
ctg1134□ctg2664□□WAG-11P1  
ctg1134□ctg2664□ctg3365□WAG-24N13  
ctg1134□ctg2664□ctg3365□WAG-102H5  
ctg1134□ctg2664□ctg3365□WAG-104E1  
ctg1134□ctg2664□ctg6801□WAG-33B1  
ctg1134□ctg2664□ctg6801□WAG-55I18  
ctg1134□ctg5426□ctg6445□WAG-53N13  
ctg1134□ctg5426□ctg6445□WAG-121M16  
ctg1135□ctg2353□□WAG-13J16  
ctg1135□ctg2353□□WAG-35C21  
ctg1135□ctg2353□□WAG-75M8  
ctg1135□ctg2353□ctg2927□WAG-52H8  
ctg1135□ctg2353□ctg2927□WAG-80D15  
ctg1135□ctg2353□ctg2927□WAG-81I11  
ctg1136□□□WAG-63L5  
ctg1136□ctg2832□□WAG-52A19  
ctg1136□ctg2832□□WAG-52D10  
ctg1136□ctg2832□□WAG-83B4  
ctg1136□ctg2832□ctg3656□WAG-1M18  
ctg1136□ctg2832□ctg3656□WAG-23L8  
ctg1136□ctg2832□ctg3656□WAG-78H7  
ctg1136□ctg2832□ctg3656□WAG-120D14  
ctg1136□ctg2832□ctg3656□WAG-126L16  
ctg1136□ctg2832□ctg3950□WAG-71A22  
ctg1136□ctg2832□ctg3950□WAG-82I6  
ctg1136□ctg2832□ctg3950□WAG-115O15  
ctg1136□ctg2832□ctg3950□WAG-128J8  
ctg1137□□□WAG-86F6  
ctg1137□ctg3130□ctg3134□WAG-41E20  
ctg1137□ctg3130□ctg3134□WAG-56K8

ctg1137□ctg3130□ctg3134□WAG-71J14  
ctg1137□ctg3130□ctg3134□WAG-129G13  
ctg1138□ctg3193□□WAG-124M24  
ctg1138□ctg3193□ctg4216□WAG-37K9  
ctg1138□ctg3193□ctg4216□WAG-93H11  
ctg1138□ctg3890□ctg4163□WAG-14B18  
ctg1138□ctg3890□ctg4163□WAG-58O12  
ctg1138□ctg3890□ctg4163□WAG-107P5  
ctg1139□□□WAG-28H8  
ctg1139□□□WAG-28L5  
ctg1139□□□WAG-123A23  
ctg1139□ctg3782□□WAG-99J15  
ctg1139□ctg3782□ctg4874□WAG-57A14  
ctg1139□ctg3782□ctg4874□WAG-79K15  
ctg1139□ctg4562□ctg4706□WAG-69K3  
ctg1139□ctg4562□ctg4706□WAG-102F21  
ctg114□□□WAG-3P11  
ctg114□ctg5752□ctg6902□WAG-3L10  
ctg114□ctg5752□ctg6902□WAG-8J23  
ctg114□ctg631□□WAG-2A21  
ctg114□ctg631□ctg656□WAG-27J22  
ctg114□ctg631□ctg656□WAG-49P16  
ctg114□ctg631□ctg656□WAG-51K10  
ctg114□ctg631□ctg656□WAG-53D19  
ctg114□ctg631□ctg656□WAG-67I1  
ctg114□ctg631□ctg656□WAG-109I16  
ctg114□ctg631□ctg656□WAG-117A7  
ctg114□ctg631□ctg656□WAG-119J17  
ctg114□ctg631□ctg656□WAG-119N20  
ctg114□ctg631□ctg656□WAG-127P8  
ctg114□ctg631□ctg656□WAG-130B9  
ctg1140□□□WAG-75F6  
ctg1140□ctg2672□ctg2646□WAG-13L19  
ctg1140□ctg2672□ctg2646□WAG-23K17  
ctg1140□ctg2672□ctg2646□WAG-66I11  
ctg1140□ctg2672□ctg2646□WAG-94K4  
ctg1140□ctg3192□□WAG-1D12  
ctg1140□ctg3192□ctg4215□WAG-108N4  
ctg1140□ctg3192□ctg4215□WAG-127B24  
ctg1140□ctg3192□ctg4659□WAG-23M4  
ctg1140□ctg3192□ctg4659□WAG-79P5  
ctg1141□ctg2740□□WAG-19B16  
ctg1141□ctg2740□□WAG-74B6  
ctg1141□ctg2740□□WAG-95K15  
ctg1141□ctg2740□□WAG-111G5  
ctg1141□ctg2740□□WAG-129C19  
ctg1141□ctg2740□ctg6796□WAG-73L13  
ctg1141□ctg2740□ctg6796□WAG-83P17  
ctg1142□ctg2272□□WAG-18G21  
ctg1142□ctg2272□ctg2815□WAG-83L16  
ctg1142□ctg2272□ctg2815□WAG-124G5  
ctg1142□ctg2272□ctg2815□WAG-127A13  
ctg1142□ctg2272□ctg2815□WAG-129D19  
ctg1143□□□WAG-100A19  
ctg1143□ctg2273□ctg2174□WAG-35I3  
ctg1143□ctg2273□ctg2174□WAG-75D12

ctg1143□ctg2273□ctg2174□WAG-90E13  
ctg1143□ctg2273□ctg2174□WAG-122F10  
ctg1144□ctg2274□□WAG-35E11  
ctg1144□ctg2274□ctg2939□WAG-19N13  
ctg1144□ctg2274□ctg2939□WAG-73A2  
ctg1144□ctg2274□ctg2939□WAG-80G14  
ctg1145□□□WAG-66A13  
ctg1145□ctg2675□□WAG-94M2  
ctg1145□ctg2675□ctg4464□WAG-50P10  
ctg1145□ctg2675□ctg4464□WAG-113O22  
ctg1145□ctg2675□ctg6315□WAG-83K18  
ctg1145□ctg2675□ctg6315□WAG-97P1  
ctg1146□ctg2621□□WAG-22M2  
ctg1146□ctg2621□□WAG-39F18  
ctg1146□ctg2621□ctg3300□WAG-66H10  
ctg1146□ctg2621□ctg3300□WAG-77L19  
ctg1146□ctg2621□ctg3300□WAG-88G20  
ctg1147□□□WAG-14I16  
ctg1147□ctg2432□□WAG-4I19  
ctg1147□ctg2432□□WAG-70O3  
ctg1147□ctg2432□ctg3751□WAG-103P13  
ctg1147□ctg2432□ctg3751□WAG-121J21  
ctg1147□ctg2432□ctg3751□WAG-130J3  
ctg1148□□□WAG-114A10  
ctg1148□ctg2278□□WAG-40H22  
ctg1148□ctg2278□ctg2823□WAG-14M14  
ctg1148□ctg2278□ctg2823□WAG-15E7  
ctg1148□ctg2278□ctg2823□WAG-58H12  
ctg1148□ctg2278□ctg2823□WAG-112M6  
ctg1148□ctg2278□ctg2886□WAG-20E15  
ctg1148□ctg2278□ctg2886□WAG-68G18  
ctg1148□ctg2278□ctg2886□WAG-92A20  
ctg1148□ctg2278□ctg4205□WAG-55L14  
ctg1148□ctg2278□ctg4205□WAG-109P5  
ctg1149□ctg2280□□WAG-12D16  
ctg1149□ctg2280□ctg2948□WAG-20M14  
ctg1149□ctg2280□ctg2948□WAG-113C5  
ctg1149□ctg2280□ctg2948□WAG-124D17  
ctg115□ctg3547□□WAG-14B10  
ctg115□ctg3547□□WAG-57P22  
ctg115□ctg3547□□WAG-85O2  
ctg115□ctg3547□ctg5323□WAG-43L14  
ctg115□ctg3547□ctg5323□WAG-128D18  
ctg115□ctg589□ctg1908□WAG-9C21  
ctg115□ctg589□ctg1908□WAG-76O12  
ctg115□ctg589□ctg1908□WAG-86H20  
ctg115□ctg589□ctg1908□WAG-97L6  
ctg115□ctg589□ctg483□WAG-2P14  
ctg115□ctg589□ctg483□WAG-7A15  
ctg115□ctg589□ctg483□WAG-11I14  
ctg115□ctg589□ctg483□WAG-48M12  
ctg115□ctg589□ctg483□WAG-103E10  
ctg115□ctg589□ctg483□WAG-120J3  
ctg1150□□□WAG-3I23  
ctg1150□□□WAG-70E12  
ctg1150□□□WAG-87E18



ctg1150□ctg3506□□WAG-16E10  
ctg1150□ctg3506□ctg4784□WAG-1H21  
ctg1150□ctg3506□ctg4784□WAG-2L6  
ctg1150□ctg3861□□WAG-56G15  
ctg1150□ctg3861□ctg5164□WAG-50H15  
ctg1150□ctg3861□ctg5164□WAG-71E4  
ctg1151□□□WAG-97J14  
ctg1151□ctg3235□□WAG-25J1  
ctg1151□ctg3235□□WAG-41J19  
ctg1151□ctg3235□□WAG-120F2  
ctg1151□ctg3235□ctg4259□WAG-41J18  
ctg1151□ctg3235□ctg4259□WAG-115J17  
ctg1152□ctg2284□ctg2189□WAG-25D1  
ctg1152□ctg2284□ctg2189□WAG-38J22  
ctg1152□ctg2284□ctg2189□WAG-54G17  
ctg1152□ctg2284□ctg2189□WAG-92K3  
ctg1153□ctg2296□ctg2195□WAG-19F19  
ctg1153□ctg2296□ctg2195□WAG-35F10  
ctg1153□ctg2296□ctg2195□WAG-67B20  
ctg1153□ctg2296□ctg2195□WAG-76D15  
ctg1153□ctg2296□ctg2195□WAG-129F20  
ctg1154□□□WAG-53E23  
ctg1154□□□WAG-63L6  
ctg1154□□□WAG-75N15  
ctg1154□□□WAG-85O23  
ctg1154□ctg3886□ctg4158□WAG-108L16  
ctg1154□ctg3886□ctg4158□WAG-109D16  
ctg1155□□□WAG-49B2  
ctg1155□□□WAG-91N20  
ctg1155□ctg2551□ctg2477□WAG-68J9  
ctg1155□ctg2551□ctg2477□WAG-87F12  
ctg1155□ctg2551□ctg2477□WAG-95J10  
ctg1156□ctg2302□□WAG-5P22  
ctg1156□ctg2302□ctg2971□WAG-6I1  
ctg1156□ctg2302□ctg2971□WAG-95E4  
ctg1156□ctg2302□ctg2971□WAG-113C2  
ctg1157□ctg2303□ctg2204□WAG-64G10  
ctg1157□ctg2303□ctg2204□WAG-80A7  
ctg1157□ctg2303□ctg2204□WAG-101O21  
ctg1158□ctg2306□ctg2975□WAG-40P14  
ctg1158□ctg2306□ctg2975□WAG-48N6  
ctg1158□ctg2306□ctg2975□WAG-59K19  
ctg1158□ctg2306□ctg2975□WAG-67K22  
ctg1159□ctg2307□ctg2206□WAG-10E18  
ctg1159□ctg2307□ctg2206□WAG-38N13  
ctg1159□ctg2307□ctg2206□WAG-121C1  
ctg116□ctg425□□WAG-47L24  
ctg116□ctg425□ctg450□WAG-37J17  
ctg116□ctg425□ctg450□WAG-42A14  
ctg116□ctg425□ctg450□WAG-66E4  
ctg116□ctg425□ctg450□WAG-80B2  
ctg116□ctg425□ctg450□WAG-101I17  
ctg116□ctg425□ctg450□WAG-103H15  
ctg116□ctg425□ctg450□WAG-126J22  
ctg1160□□□WAG-56A16  
ctg1160□□□WAG-125N7

ctg1160□ctg2773□ctg2752□WAG-11C17  
ctg1160□ctg2773□ctg2752□WAG-40E2  
ctg1160□ctg2773□ctg2752□WAG-119C21  
ctg1161□ctg2694□□WAG-10H7  
ctg1161□ctg2694□□WAG-62C11  
ctg1161□ctg2694□ctg3589□WAG-8A4  
ctg1161□ctg2694□ctg3589□WAG-43L2  
ctg1161□ctg2694□ctg3589□WAG-55C16  
ctg1162□□□WAG-85I8  
ctg1162□ctg2698□□WAG-26J15  
ctg1162□ctg2698□ctg3591□WAG-57F20  
ctg1162□ctg2698□ctg3591□WAG-59B11  
ctg1162□ctg2698□ctg3591□WAG-121N7  
ctg1163□□□WAG-91H8  
ctg1163□ctg2776□ctg2759□WAG-67M6  
ctg1163□ctg2776□ctg2759□WAG-80L19  
ctg1163□ctg2776□ctg2759□WAG-103M24  
ctg1164□□□WAG-119C19  
ctg1164□ctg2312□□WAG-53C24  
ctg1164□ctg2312□□WAG-128C12  
ctg1164□ctg2312□□WAG-128L18  
ctg1164□ctg2312□ctg4827□WAG-43I2  
ctg1164□ctg2312□ctg4827□WAG-106D21  
ctg1165□ctg2315□ctg2220□WAG-89P23  
ctg1165□ctg2315□ctg2220□WAG-93B23  
ctg1165□ctg2315□ctg2220□WAG-99P6  
ctg1165□ctg2315□ctg2220□WAG-113O16  
ctg1166□□□WAG-37I10  
ctg1166□□□WAG-41B14  
ctg1166□ctg3800□□WAG-41B11  
ctg1166□ctg3800□□WAG-120K21  
ctg1166□ctg3800□ctg5046□WAG-117O14  
ctg1166□ctg3800□ctg5046□WAG-119K19  
ctg1166□ctg3936□□WAG-63C5  
ctg1166□ctg3936□ctg5340□WAG-7F17  
ctg1166□ctg3936□ctg5340□WAG-94K24  
ctg1166□ctg5731□□WAG-49D16  
ctg1166□ctg5731□□WAG-65I19  
ctg1167□□□WAG-3O12  
ctg1167□□□WAG-4H3  
ctg1167□ctg2705□ctg3396□WAG-35A9  
ctg1167□ctg2705□ctg3396□WAG-83K9  
ctg1167□ctg2705□ctg3396□WAG-110A4  
ctg1167□ctg2705□ctg3396□WAG-123F15  
ctg1167□ctg4913□ctg5250□WAG-65K7  
ctg1167□ctg4913□ctg5250□WAG-78M10  
ctg1168□ctg2563□ctg2503□WAG-65I1  
ctg1168□ctg2563□ctg2503□WAG-81B4  
ctg1168□ctg2563□ctg2503□WAG-100J13  
ctg1168□ctg2563□ctg2503□WAG-111P4  
ctg1168□ctg2563□ctg2503□WAG-119A21  
ctg1169□□□WAG-12I11  
ctg1169□ctg2789□ctg2779□WAG-65C15  
ctg1169□ctg2789□ctg2779□WAG-66F3  
ctg1169□ctg2789□ctg2779□WAG-76K10  
ctg1169□ctg2789□ctg2779□WAG-77F11

ctg117□□□WAG-130O2  
ctg117□ctg363□□WAG-78D15  
ctg117□ctg363□ctg3917□WAG-49D21  
ctg117□ctg363□ctg3917□WAG-58B8  
ctg117□ctg363□ctg3917□WAG-80D12  
ctg117□ctg363□ctg452□WAG-10K9  
ctg117□ctg363□ctg452□WAG-16I18  
ctg117□ctg363□ctg452□WAG-26D21  
ctg117□ctg363□ctg452□WAG-45N3  
ctg117□ctg363□ctg452□WAG-68J24  
ctg117□ctg363□ctg452□WAG-70E20  
ctg117□ctg363□ctg452□WAG-81N13  
ctg117□ctg363□ctg452□WAG-94P6  
ctg117□ctg363□ctg452□WAG-112E21  
ctg117□ctg363□ctg5157□WAG-75C22  
ctg117□ctg363□ctg5157□WAG-107K5  
ctg117□ctg3916□□WAG-31G15  
ctg117□ctg3916□ctg5285□WAG-89J19  
ctg117□ctg3916□ctg5285□WAG-93G8  
ctg1170□□□WAG-55N23  
ctg1170□□□WAG-96D14  
ctg1170□□□WAG-126O1  
ctg1170□ctg3269□□WAG-17A18  
ctg1170□ctg3269□□WAG-51O15  
ctg1170□ctg3269□ctg3682□WAG-15M1  
ctg1170□ctg3269□ctg3682□WAG-43C5  
ctg1170□ctg3269□ctg3682□WAG-91M16  
ctg1170□ctg3302□ctg3362□WAG-55B16  
ctg1170□ctg3302□ctg3362□WAG-76A20  
ctg1170□ctg3302□ctg3362□WAG-96H23  
ctg1170□ctg3302□ctg3362□WAG-113F23  
ctg1170□ctg3302□ctg6923□WAG-81O6  
ctg1170□ctg3302□ctg6923□WAG-104N3  
ctg1171□ctg2710□□WAG-56L3  
ctg1171□ctg2710□□WAG-112L20  
ctg1171□ctg2710□ctg3435□WAG-77B18  
ctg1171□ctg2710□ctg3435□WAG-111N13  
ctg1171□ctg2710□ctg3435□WAG-121G23  
ctg1172□ctg2320□ctg3001□WAG-14H21  
ctg1172□ctg2320□ctg3001□WAG-72J17  
ctg1172□ctg2320□ctg3001□WAG-81J20  
ctg1172□ctg2320□ctg3001□WAG-90O15  
ctg1172□ctg2320□ctg3001□WAG-101F16  
ctg1173□□□WAG-27P1  
ctg1173□ctg2321□ctg3002□WAG-20L1  
ctg1173□ctg2321□ctg3002□WAG-71A21  
ctg1173□ctg2321□ctg3002□WAG-81P12  
ctg1173□ctg2321□ctg3002□WAG-87G8  
ctg1173□ctg6477□□WAG-34J5  
ctg1173□ctg6477□□WAG-58J11  
ctg1174□□□WAG-52J5  
ctg1174□□□WAG-97O20  
ctg1174□ctg2714□□WAG-71E24  
ctg1174□ctg2714□ctg3090□WAG-72K22  
ctg1174□ctg2714□ctg3090□WAG-109B10  
ctg1174□ctg2714□ctg3090□WAG-116I15

ctg1174□ctg4169□ctg5984□WAG-17H16  
ctg1174□ctg4169□ctg5984□WAG-112O8  
ctg1174□ctg4169□ctg6031□WAG-47H3  
ctg1174□ctg4169□ctg6031□WAG-120H1  
ctg1175□ctg2322□ctg2225□WAG-58D1  
ctg1175□ctg2322□ctg2225□WAG-63O5  
ctg1175□ctg2322□ctg2225□WAG-69P22  
ctg1175□ctg2322□ctg2225□WAG-103F12  
ctg1176□ctg2324□ctg2228□WAG-20C4  
ctg1176□ctg2324□ctg2228□WAG-24B17  
ctg1176□ctg2324□ctg2228□WAG-112H19  
ctg1176□ctg2324□ctg2228□WAG-116I10  
ctg1177□ctg2325□ctg2229□WAG-8J5  
ctg1177□ctg2325□ctg2229□WAG-24F7  
ctg1177□ctg2325□ctg2229□WAG-68J19  
ctg1177□ctg2325□ctg2229□WAG-90K1  
ctg1178□ctg2769□□WAG-40K4  
ctg1178□ctg2769□ctg2786□WAG-46N20  
ctg1178□ctg2769□ctg2786□WAG-72N4  
ctg1178□ctg2769□ctg2786□WAG-123L3  
ctg1179□ctg2397□□WAG-50P7  
ctg1179□ctg2397□□WAG-99C1  
ctg1179□ctg2397□ctg4676□WAG-39L13  
ctg1179□ctg2397□ctg4676□WAG-93E3  
ctg1179□ctg2397□ctg4812□WAG-49P10  
ctg1179□ctg2397□ctg4812□WAG-123K20  
ctg1179□ctg2397□ctg5095□WAG-71M10  
ctg1179□ctg2397□ctg5095□WAG-76C13  
ctg118□ctg364□ctg355□WAG-41M2  
ctg118□ctg364□ctg355□WAG-41M7  
ctg118□ctg364□ctg355□WAG-62G9  
ctg118□ctg364□ctg355□WAG-63M2  
ctg118□ctg364□ctg355□WAG-65D10  
ctg118□ctg364□ctg355□WAG-93J19  
ctg118□ctg364□ctg355□WAG-103B16  
ctg118□ctg364□ctg355□WAG-109C13  
ctg118□ctg364□ctg355□WAG-114C23  
ctg1180□□□WAG-77E14  
ctg1180□□□WAG-85C6  
ctg1180□ctg2801□□WAG-105A6  
ctg1180□ctg2801□□WAG-107O24  
ctg1180□ctg2801□ctg3270□WAG-94D11  
ctg1180□ctg2801□ctg3270□WAG-113D13  
ctg1180□ctg2801□ctg3270□WAG-125O4  
ctg1180□ctg3798□□WAG-39N13  
ctg1180□ctg3798□ctg5027□WAG-55D17  
ctg1180□ctg3798□ctg5027□WAG-125I22  
ctg1181□ctg2333□□WAG-17O2  
ctg1181□ctg2333□ctg3022□WAG-76E19  
ctg1181□ctg2333□ctg3022□WAG-120N5  
ctg1181□ctg2333□ctg3022□WAG-128G13  
ctg1182□□□WAG-115F22  
ctg1182□□□WAG-126P2  
ctg1182□ctg2734□□WAG-12G4  
ctg1182□ctg2734□□WAG-72E1  
ctg1182□ctg2734□ctg3482□WAG-69K4

ctg1182□ctg2734□ctg3482□WAG-71A19  
ctg1182□ctg2734□ctg3482□WAG-74O12  
ctg1182□ctg2734□ctg5832□WAG-104B21  
ctg1182□ctg2734□ctg5832□WAG-130E21  
ctg1183□□□WAG-106C7  
ctg1183□ctg2338□ctg2240□WAG-22K7  
ctg1183□ctg2338□ctg2240□WAG-50G4  
ctg1183□ctg2338□ctg2240□WAG-79E15  
ctg1183□ctg2338□ctg2240□WAG-126M17  
ctg1184□□□WAG-42P13  
ctg1184□ctg2339□ctg2242□WAG-15J24  
ctg1184□ctg2339□ctg2242□WAG-72H5  
ctg1184□ctg2339□ctg2242□WAG-92F2  
ctg1184□ctg2339□ctg2242□WAG-113O5  
ctg1185□ctg2814□ctg2811□WAG-14N4  
ctg1185□ctg2814□ctg2811□WAG-28F4  
ctg1185□ctg2814□ctg2811□WAG-44J11  
ctg1185□ctg2814□ctg2811□WAG-92B17  
ctg1186□ctg3221□ctg3246□WAG-69I13  
ctg1186□ctg3221□ctg3246□WAG-69J13  
ctg1186□ctg3221□ctg3246□WAG-108E13  
ctg1186□ctg5010□ctg5487□WAG-26P21  
ctg1186□ctg5010□ctg5487□WAG-127O7  
ctg1187□□□WAG-14M22  
ctg1187□□□WAG-44M18  
ctg1187□□□WAG-98J7  
ctg1187□ctg2741□ctg4598□WAG-55C11  
ctg1187□ctg2741□ctg4598□WAG-98B15  
ctg1187□ctg2741□ctg5815□WAG-43B21  
ctg1187□ctg2741□ctg5815□WAG-113C1  
ctg1187□ctg4707□□WAG-16E23  
ctg1187□ctg4707□□WAG-92H24  
ctg1187□ctg4707□□WAG-105N13  
ctg1188□ctg2816□□WAG-95N12  
ctg1188□ctg2816□ctg3681□WAG-21A18  
ctg1188□ctg2816□ctg3681□WAG-89G12  
ctg1188□ctg2816□ctg3681□WAG-96M7  
ctg1188□ctg2816□ctg3681□WAG-100K11  
ctg1189□ctg2343□□WAG-75M15  
ctg1189□ctg2343□□WAG-109M14  
ctg1189□ctg2343□□WAG-111E20  
ctg1189□ctg2343□ctg3565□WAG-80F6  
ctg1189□ctg2343□ctg3565□WAG-98G17  
ctg1189□ctg2343□ctg3565□WAG-109E21  
ctg119□□□WAG-1C15  
ctg119□□□WAG-106C4  
ctg119□ctg3802□□WAG-119D16  
ctg119□ctg3802□ctg5359□WAG-21J11  
ctg119□ctg3802□ctg5359□WAG-47D4  
ctg119□ctg620□□WAG-28L1  
ctg119□ctg620□ctg816□WAG-24J16  
ctg119□ctg620□ctg816□WAG-24P18  
ctg119□ctg620□ctg816□WAG-33K1  
ctg119□ctg620□ctg816□WAG-55O14  
ctg119□ctg620□ctg816□WAG-57K23  
ctg119□ctg620□ctg816□WAG-58P24

ctg119□ctg620□ctg816□WAG-72N23  
ctg119□ctg620□ctg816□WAG-101B13  
ctg119□ctg620□ctg816□WAG-106P6  
ctg119□ctg620□ctg816□WAG-114P19  
ctg1190□□□WAG-77G2  
ctg1190□ctg2818□ctg2813□WAG-43O1  
ctg1190□ctg2818□ctg2813□WAG-80E1  
ctg1191□□□WAG-67E19  
ctg1191□ctg3310□□WAG-38M21  
ctg1191□ctg3310□ctg3372□WAG-38O7  
ctg1191□ctg3310□ctg3372□WAG-65J17  
ctg1191□ctg3310□ctg3372□WAG-125B5  
ctg1192□ctg2345□ctg2428□WAG-29E8  
ctg1192□ctg2345□ctg2428□WAG-31B14  
ctg1192□ctg2345□ctg2428□WAG-61J24  
ctg1192□ctg2345□ctg2428□WAG-71K7  
ctg1192□ctg2345□ctg2428□WAG-78P14  
ctg1193□ctg2347□□WAG-32I12  
ctg1193□ctg2347□ctg3996□WAG-40H6  
ctg1193□ctg2347□ctg3996□WAG-65B15  
ctg1193□ctg2347□ctg3996□WAG-96F10  
ctg1193□ctg2347□ctg3996□WAG-99N2  
ctg1194□□□WAG-12M10  
ctg1194□ctg2752□ctg2733□WAG-13O17  
ctg1194□ctg2752□ctg2733□WAG-32C13  
ctg1194□ctg2752□ctg2733□WAG-73N16  
ctg1194□ctg2752□ctg2733□WAG-90I20  
ctg1195□□□WAG-14G9  
ctg1195□□□WAG-33G16  
ctg1195□□□WAG-35K2  
ctg1195□ctg2753□□WAG-8L24  
ctg1195□ctg2753□□WAG-86J24  
ctg1195□ctg2753□□WAG-95E6  
ctg1195□ctg2753□ctg3378□WAG-8G3  
ctg1195□ctg2753□ctg3378□WAG-104B17  
ctg1195□ctg2753□ctg3378□WAG-109I20  
ctg1195□ctg3388□ctg3479□WAG-16J19  
ctg1195□ctg3388□ctg3479□WAG-83D1  
ctg1196□ctg2837□□WAG-35E10  
ctg1196□ctg2837□□WAG-69I1  
ctg1196□ctg2837□□WAG-86M5  
ctg1196□ctg2837□□WAG-105A22  
ctg1196□ctg2837□ctg4794□WAG-58M18  
ctg1196□ctg2837□ctg4794□WAG-111N8  
ctg1197□□□WAG-66G16  
ctg1197□□□WAG-92M13  
ctg1197□□□WAG-114O13  
ctg1197□ctg2992□□WAG-69C5  
ctg1197□ctg2992□ctg2974□WAG-60L22  
ctg1197□ctg2992□ctg2974□WAG-77J15  
ctg1197□ctg2992□ctg2974□WAG-125N8  
ctg1197□ctg3321□ctg3384□WAG-24J21  
ctg1197□ctg3321□ctg3384□WAG-76C16  
ctg1197□ctg3321□ctg3384□WAG-119P23  
ctg1197□ctg5921□□WAG-13A18  
ctg1197□ctg5921□□WAG-52E2

ctg1197□ctg6323□□WAG-14B9  
ctg1197□ctg6323□□WAG-25P16  
ctg1198□ctg2359□ctg2940□WAG-40C8  
ctg1198□ctg2359□ctg2940□WAG-50F6  
ctg1198□ctg2359□ctg2940□WAG-90H24  
ctg1198□ctg2359□ctg2940□WAG-91C6  
ctg1198□ctg2359□ctg2940□WAG-125M24  
ctg1199□ctg3326□□WAG-35M9  
ctg1199□ctg3326□□WAG-36J3  
ctg1199□ctg3326□□WAG-39M3  
ctg1199□ctg3326□□WAG-99M15  
ctg1199□ctg3326□□WAG-127F5  
ctg1199□ctg3326□ctg5905□WAG-3H11  
ctg1199□ctg3326□ctg5905□WAG-87L8  
ctg1199□ctg3326□ctg6137□WAG-12D15  
ctg1199□ctg3326□ctg6137□WAG-58D9  
ctg12□□□WAG-2N8  
ctg12□□□WAG-53A4  
ctg12□ctg74□□WAG-63A5  
ctg12□ctg74□ctg121□WAG-13D3  
ctg12□ctg74□ctg121□WAG-15N20  
ctg12□ctg74□ctg121□WAG-16P16  
ctg12□ctg74□ctg121□WAG-19C9  
ctg12□ctg74□ctg121□WAG-24I6  
ctg12□ctg74□ctg121□WAG-26K23  
ctg12□ctg74□ctg121□WAG-39F13  
ctg12□ctg74□ctg121□WAG-46B18  
ctg12□ctg74□ctg121□WAG-59K8  
ctg12□ctg74□ctg121□WAG-62P18  
ctg12□ctg74□ctg121□WAG-70C8  
ctg12□ctg74□ctg121□WAG-72D23  
ctg12□ctg74□ctg121□WAG-82A13  
ctg12□ctg74□ctg121□WAG-88G7  
ctg12□ctg74□ctg121□WAG-99I18  
ctg12□ctg74□ctg121□WAG-105K1  
ctg12□ctg74□ctg121□WAG-108P6  
ctg12□ctg74□ctg121□WAG-110F23  
ctg12□ctg74□ctg121□WAG-115N13  
ctg12□ctg74□ctg121□WAG-118H22  
ctg12□ctg74□ctg121□WAG-129M12  
ctg12□ctg74□ctg121□WAG-130P10  
ctg120□□□WAG-19P21  
ctg120□□□WAG-32M4  
ctg120□□□WAG-89G14  
ctg120□□□WAG-91J8  
ctg120□ctg408□□WAG-49L4  
ctg120□ctg408□ctg1580□WAG-32B24  
ctg120□ctg408□ctg1580□WAG-90O10  
ctg120□ctg408□ctg1580□WAG-94K13  
ctg120□ctg408□ctg1580□WAG-114A6  
ctg120□ctg408□ctg2170□WAG-57M12  
ctg120□ctg408□ctg2170□WAG-96I17  
ctg120□ctg408□ctg2170□WAG-102D23  
ctg120□ctg408□ctg2170□WAG-108H7  
ctg120□ctg408□ctg2170□WAG-116C11  
ctg120□ctg408□ctg534□WAG-43D16

ctg120□ctg408□ctg534□WAG-43N2  
ctg120□ctg408□ctg534□WAG-52K7  
ctg120□ctg408□ctg534□WAG-61O4  
ctg120□ctg408□ctg534□WAG-67P14  
ctg120□ctg408□ctg534□WAG-78J15  
ctg120□ctg408□ctg534□WAG-91P11  
ctg1200□□□WAG-61M1  
ctg1200□ctg2841□ctg2826□WAG-31A16  
ctg1200□ctg2841□ctg2826□WAG-116D14  
ctg1200□ctg2841□ctg2826□WAG-130O14  
ctg1201□ctg3328□ctg3393□WAG-47C20  
ctg1201□ctg3328□ctg3393□WAG-71I3  
ctg1201□ctg4062□ctg4336□WAG-49M21  
ctg1201□ctg4062□ctg4336□WAG-57I18  
ctg1201□ctg4062□ctg4336□WAG-116B22  
ctg1202□□□WAG-19I19  
ctg1202□ctg3252□□WAG-123D18  
ctg1202□ctg3252□ctg3529□WAG-46G9  
ctg1202□ctg3252□ctg3529□WAG-74K22  
ctg1202□ctg3252□ctg3529□WAG-95N20  
ctg1203□□□WAG-15M11  
ctg1203□□□WAG-75L13  
ctg1203□ctg2368□□WAG-15M14  
ctg1203□ctg2368□□WAG-33C24  
ctg1203□ctg2368□□WAG-100O3  
ctg1203□ctg2368□□WAG-125G15  
ctg1203□ctg2368□ctg5008□WAG-69G15  
ctg1203□ctg2368□ctg5008□WAG-83D22  
ctg1204□□□WAG-9K14  
ctg1204□□□WAG-22J9  
ctg1204□□□WAG-32A19  
ctg1204□ctg2770□□WAG-18H3  
ctg1204□ctg2770□ctg3548□WAG-60G18  
ctg1204□ctg2770□ctg3548□WAG-72D15  
ctg1204□ctg2770□ctg3548□WAG-79F12  
ctg1205□ctg2370□ctg2267□WAG-46L12  
ctg1205□ctg2370□ctg2267□WAG-109P24  
ctg1205□ctg2370□ctg2267□WAG-113H8  
ctg1206□□□WAG-61H19  
ctg1206□ctg2375□ctg2271□WAG-6A22  
ctg1206□ctg2375□ctg2271□WAG-23D6  
ctg1206□ctg2375□ctg2271□WAG-75A9  
ctg1206□ctg2375□ctg2271□WAG-79F13  
ctg1207□ctg2376□ctg2272□WAG-68P6  
ctg1207□ctg2376□ctg2272□WAG-90L12  
ctg1208□□□WAG-17C2  
ctg1208□ctg2400□□WAG-24I3  
ctg1208□ctg2400□□WAG-99O4  
ctg1208□ctg2400□□WAG-110I3  
ctg1208□ctg2400□ctg2844□WAG-75J23  
ctg1208□ctg2400□ctg2844□WAG-107G20  
ctg1208□ctg2400□ctg2844□WAG-124N5  
ctg1209□□□WAG-46J21  
ctg1209□ctg2772□□WAG-111L7  
ctg1209□ctg2772□ctg4499□WAG-66L6  
ctg1209□ctg2772□ctg4499□WAG-86I22



ctg1209□ctg2772□ctg4499□WAG-87E21  
ctg1209□ctg2772□ctg6373□WAG-105F12  
ctg1209□ctg2772□ctg6373□WAG-114F8  
ctg121□ctg1475□□WAG-6N22  
ctg121□ctg1475□□WAG-97H5  
ctg121□ctg1475□ctg1331□WAG-12P22  
ctg121□ctg1475□ctg1331□WAG-21D18  
ctg121□ctg1475□ctg1331□WAG-24F17  
ctg121□ctg1475□ctg1331□WAG-41B18  
ctg121□ctg1475□ctg1331□WAG-42O8  
ctg121□ctg1475□ctg1331□WAG-43J14  
ctg121□ctg367□□WAG-25J11  
ctg121□ctg367□□WAG-57E8  
ctg121□ctg367□ctg274□WAG-7G18  
ctg121□ctg367□ctg274□WAG-39P11  
ctg121□ctg367□ctg274□WAG-42I19  
ctg121□ctg367□ctg274□WAG-49E18  
ctg121□ctg367□ctg274□WAG-50H13  
ctg121□ctg367□ctg274□WAG-55P9  
ctg121□ctg367□ctg274□WAG-65G18  
ctg121□ctg367□ctg274□WAG-65J8  
ctg121□ctg367□ctg274□WAG-68H17  
ctg121□ctg367□ctg274□WAG-71A9  
ctg121□ctg367□ctg274□WAG-82E8  
ctg121□ctg367□ctg274□WAG-83P2  
ctg121□ctg367□ctg274□WAG-126H11  
ctg121□ctg6176□□WAG-68F13  
ctg121□ctg6176□□WAG-117M24  
ctg1210□□□WAG-97L18  
ctg1210□ctg2858□□WAG-75J5  
ctg1210□ctg2858□□WAG-126H12  
ctg1210□ctg2858□ctg3697□WAG-26O14  
ctg1210□ctg2858□ctg3697□WAG-34H14  
ctg1210□ctg2858□ctg3697□WAG-89C17  
ctg1211□ctg2687□□WAG-125O5  
ctg1211□ctg2687□ctg2664□WAG-38G20  
ctg1211□ctg2687□ctg2664□WAG-40P15  
ctg1211□ctg2687□ctg2664□WAG-41I9  
ctg1211□ctg2687□ctg2664□WAG-96K2  
ctg1212□□□WAG-106E13  
ctg1212□ctg2383□ctg2281□WAG-25P11  
ctg1212□ctg2383□ctg2281□WAG-57E17  
ctg1212□ctg2383□ctg2281□WAG-128I16  
ctg1212□ctg4635□□WAG-17O3  
ctg1212□ctg4635□□WAG-22I19  
ctg1212□ctg4635□□WAG-30H24  
ctg1213□□□WAG-5A23  
ctg1213□ctg2384□ctg2963□WAG-121P6  
ctg1213□ctg2384□ctg2963□WAG-124F23  
ctg1213□ctg2384□ctg2963□WAG-125F12  
ctg1214□□□WAG-53N16  
ctg1214□□□WAG-71J15  
ctg1214□□□WAG-116D10  
ctg1214□ctg2613□ctg2579□WAG-96I22  
ctg1214□ctg2613□ctg2579□WAG-112O22  
ctg1214□ctg2613□ctg2579□WAG-121C4

ctg1214□ctg2613□ctg2579□WAG-126M23  
ctg1214□ctg3355□ctg3431□WAG-8M6  
ctg1214□ctg3355□ctg3431□WAG-39D9  
ctg1214□ctg4295□ctg4486□WAG-113O23  
ctg1214□ctg4295□ctg4486□WAG-126C3  
ctg1215□□□WAG-35G6  
ctg1215□ctg2781□□WAG-84F6  
ctg1215□ctg2781□□WAG-97A4  
ctg1215□ctg2781□ctg3757□WAG-36I15  
ctg1215□ctg2781□ctg3757□WAG-83J6  
ctg1215□ctg2781□ctg3757□WAG-114J4  
ctg1216□□□WAG-50P4  
ctg1216□ctg3353□□WAG-56H22  
ctg1216□ctg3353□ctg4338□WAG-24M5  
ctg1216□ctg3353□ctg4338□WAG-49O24  
ctg1216□ctg3353□ctg4338□WAG-66P10  
ctg1216□ctg3353□ctg4338□WAG-116P4  
ctg1216□ctg6145□□WAG-23A4  
ctg1216□ctg6145□□WAG-42I2  
ctg1217□□□WAG-6O20  
ctg1217□□□WAG-15I24  
ctg1217□□□WAG-55J13  
ctg1217□□□WAG-60O4  
ctg1217□ctg3358□□WAG-65M16  
ctg1217□ctg3358□□WAG-79H8  
ctg1217□ctg3358□□WAG-118C2  
ctg1217□ctg3358□ctg4719□WAG-58M17  
ctg1217□ctg3358□ctg4719□WAG-127A14  
ctg1217□ctg4053□□WAG-14I18  
ctg1217□ctg4053□□WAG-49P8  
ctg1217□ctg4053□ctg6056□WAG-73E20  
ctg1217□ctg4053□ctg6056□WAG-95P18  
ctg1218□□□WAG-44G16  
ctg1218□ctg2790□ctg3253□WAG-26F17  
ctg1218□ctg2790□ctg3253□WAG-43C4  
ctg1218□ctg2790□ctg3253□WAG-58G11  
ctg1218□ctg2790□ctg3253□WAG-76E16  
ctg1219□□□WAG-49F22  
ctg1219□ctg2886□□WAG-94K6  
ctg1219□ctg2886□ctg3313□WAG-31D7  
ctg1219□ctg2886□ctg3313□WAG-40G16  
ctg1219□ctg2886□ctg3313□WAG-128D5  
ctg122□ctg674□□WAG-61C17  
ctg122□ctg674□□WAG-106F4  
ctg122□ctg674□ctg1078□WAG-17A23  
ctg122□ctg674□ctg1078□WAG-17E13  
ctg122□ctg674□ctg1078□WAG-34E13  
ctg122□ctg674□ctg1078□WAG-41N7  
ctg122□ctg674□ctg1078□WAG-42B21  
ctg122□ctg674□ctg1078□WAG-50I24  
ctg122□ctg674□ctg1078□WAG-65A20  
ctg122□ctg674□ctg1078□WAG-87B15  
ctg122□ctg674□ctg1078□WAG-105B15  
ctg122□ctg674□ctg1078□WAG-119H8  
ctg1220□□□WAG-4B8  
ctg1220□□□WAG-58H1

ctg1220□ctg3524□□WAG-74F23  
ctg1220□ctg3524□ctg3887□WAG-120N14  
ctg1220□ctg3524□ctg3887□WAG-125N24  
ctg1220□ctg3524□ctg3887□WAG-127A20  
ctg1221□ctg2731□□WAG-39G5  
ctg1221□ctg2731□ctg3308□WAG-43J3  
ctg1221□ctg2731□ctg3308□WAG-66C2  
ctg1221□ctg2731□ctg3308□WAG-101D18  
ctg1221□ctg2731□ctg3308□WAG-129G19  
ctg1222□□□WAG-102K21  
ctg1222□ctg2830□□WAG-118J1  
ctg1222□ctg2830□ctg2822□WAG-36C2  
ctg1222□ctg2830□ctg2822□WAG-68P16  
ctg1222□ctg2830□ctg2822□WAG-91O14  
ctg1222□ctg2854□ctg2840□WAG-10P6  
ctg1222□ctg2854□ctg2840□WAG-23D20  
ctg1222□ctg2854□ctg2840□WAG-67A1  
ctg1222□ctg4332□□WAG-43G15  
ctg1222□ctg4332□ctg6415□WAG-49M19  
ctg1222□ctg4332□ctg6415□WAG-68P8  
ctg1223□□□WAG-13O24  
ctg1223□ctg3374□□WAG-28P12  
ctg1223□ctg3374□□WAG-97G1  
ctg1223□ctg3374□ctg4437□WAG-29B8  
ctg1223□ctg3374□ctg4437□WAG-65E4  
ctg1224□ctg2409□ctg3131□WAG-79D7  
ctg1224□ctg2409□ctg3131□WAG-103B19  
ctg1224□ctg2409□ctg3131□WAG-104P6  
ctg1224□ctg2409□ctg3131□WAG-119L14  
ctg1225□□□WAG-3I15  
ctg1225□□□WAG-43K1  
ctg1225□ctg2909□□WAG-97H6  
ctg1225□ctg2909□ctg3743□WAG-8C18  
ctg1225□ctg2909□ctg3743□WAG-105F13  
ctg1226□ctg2911□□WAG-80I3  
ctg1226□ctg2911□ctg3945□WAG-4E21  
ctg1226□ctg2911□ctg3945□WAG-111F3  
ctg1226□ctg2911□ctg3945□WAG-117K7  
ctg1226□ctg2911□ctg5040□WAG-42A10  
ctg1226□ctg2911□ctg5040□WAG-79B16  
ctg1227□ctg2415□□WAG-96I14  
ctg1227□ctg2415□ctg3009□WAG-67I18  
ctg1227□ctg2415□ctg3009□WAG-71F15  
ctg1227□ctg2415□ctg3009□WAG-80H17  
ctg1228□ctg2422□ctg2331□WAG-57M3  
ctg1228□ctg2422□ctg2331□WAG-113E17  
ctg1228□ctg2422□ctg2331□WAG-114P4  
ctg1229□ctg2812□ctg2805□WAG-2J20  
ctg1229□ctg2812□ctg2805□WAG-57I9  
ctg1229□ctg2812□ctg2805□WAG-106B5  
ctg1229□ctg2812□ctg2805□WAG-116N1  
ctg123□□□WAG-12J20  
ctg123□□□WAG-63L8  
ctg123□□□WAG-67C7  
ctg123□□□WAG-113D15  
ctg123□ctg2014□□WAG-100I6

ctg123□ctg2014□□WAG-111L13  
ctg123□ctg2014□ctg4042□WAG-71K5  
ctg123□ctg2014□ctg4042□WAG-100D16  
ctg123□ctg2014□ctg4042□WAG-101G22  
ctg123□ctg2014□ctg4380□WAG-20M7  
ctg123□ctg2014□ctg4380□WAG-70H15  
ctg123□ctg2014□ctg4380□WAG-91J7  
ctg123□ctg2542□□WAG-84O13  
ctg123□ctg2542□ctg2468□WAG-65E21  
ctg123□ctg2542□ctg2468□WAG-74I3  
ctg123□ctg2542□ctg2468□WAG-97K21  
ctg123□ctg2542□ctg2468□WAG-123H11  
ctg123□ctg2542□ctg2468□WAG-127K10  
ctg123□ctg3206□ctg3231□WAG-64P19  
ctg123□ctg3206□ctg3231□WAG-72C13  
ctg123□ctg3206□ctg3231□WAG-112L24  
ctg123□ctg6293□□WAG-95E12  
ctg123□ctg6293□□WAG-103L14  
ctg1230□□□WAG-120N15  
ctg1230□ctg2424□□WAG-17K1  
ctg1230□ctg2424□□WAG-79F10  
ctg1230□ctg2424□ctg4118□WAG-26C1  
ctg1230□ctg2424□ctg4118□WAG-99C24  
ctg1230□ctg2424□ctg4118□WAG-101F10  
ctg1231□ctg2425□ctg3144□WAG-43G23  
ctg1231□ctg2425□ctg3144□WAG-71M18  
ctg1231□ctg2425□ctg3144□WAG-71N19  
ctg1231□ctg2425□ctg3144□WAG-71N20  
ctg1232□□□WAG-36I21  
ctg1232□ctg2921□□WAG-76K7  
ctg1232□ctg2921□ctg2977□WAG-50H5  
ctg1232□ctg2921□ctg2977□WAG-57G3  
ctg1232□ctg2921□ctg2977□WAG-66O19  
ctg1232□ctg4917□ctg5257□WAG-10M5  
ctg1232□ctg4917□ctg5257□WAG-35D19  
ctg1232□ctg5067□ctg5602□WAG-15L18  
ctg1232□ctg5067□ctg5602□WAG-30D11  
ctg1232□ctg5642□ctg6813□WAG-1K21  
ctg1232□ctg5642□ctg6813□WAG-86N18  
ctg1233□ctg2428□ctg2334□WAG-27D1  
ctg1233□ctg2428□ctg2334□WAG-68N2  
ctg1233□ctg2428□ctg2334□WAG-121B22  
ctg1234□□□WAG-128B3  
ctg1234□ctg2817□ctg3631□WAG-59I18  
ctg1234□ctg2817□ctg3631□WAG-63D10  
ctg1234□ctg2817□ctg3631□WAG-69H13  
ctg1234□ctg2817□ctg3631□WAG-84K15  
ctg1234□ctg3320□ctg3379□WAG-34E20  
ctg1234□ctg3320□ctg3379□WAG-45H5  
ctg1234□ctg3320□ctg3379□WAG-92K10  
ctg1235□ctg2632□ctg2594□WAG-23M17  
ctg1235□ctg2632□ctg2594□WAG-36L5  
ctg1235□ctg2632□ctg2594□WAG-56D2  
ctg1235□ctg2632□ctg2594□WAG-58M23  
ctg1235□ctg2632□ctg2594□WAG-81L8  
ctg1236□□□WAG-31L9

ctg1236□□□WAG-87L6  
ctg1236□□□WAG-88J3  
ctg1236□□□WAG-129E21  
ctg1236□ctg3852□ctg4123□WAG-33B18  
ctg1236□ctg3852□ctg4123□WAG-51I15  
ctg1236□ctg3852□ctg4123□WAG-117M13  
ctg1237□□□WAG-54I22  
ctg1237□□□WAG-94P3  
ctg1237□ctg2437□ctg2349□WAG-98C10  
ctg1237□ctg2437□ctg2349□WAG-100E11  
ctg1237□ctg2437□ctg2349□WAG-123M16  
ctg1237□ctg4186□□WAG-120E2  
ctg1237□ctg4186□ctg6542□WAG-8L11  
ctg1237□ctg4186□ctg6542□WAG-94N14  
ctg1237□ctg4648□ctg4803□WAG-55A9  
ctg1237□ctg4648□ctg4803□WAG-62L8  
ctg1238□ctg2667□□WAG-85H11  
ctg1238□ctg2667□ctg2918□WAG-7K8  
ctg1238□ctg2667□ctg2918□WAG-85G2  
ctg1238□ctg2667□ctg2918□WAG-109H2  
ctg1239□□□WAG-107F7  
ctg1239□ctg2749□□WAG-103F5  
ctg1239□ctg2749□□WAG-125J23  
ctg1239□ctg2749□ctg3517□WAG-25O2  
ctg1239□ctg2749□ctg3517□WAG-63G22  
ctg124□□□WAG-110O9  
ctg124□ctg5622□ctg6789□WAG-37M22  
ctg124□ctg5622□ctg6789□WAG-105G7  
ctg124□ctg659□□WAG-41F5  
ctg124□ctg659□□WAG-130N19  
ctg124□ctg659□ctg773□WAG-13F13  
ctg124□ctg659□ctg773□WAG-30E13  
ctg124□ctg659□ctg773□WAG-55M3  
ctg124□ctg659□ctg773□WAG-95A24  
ctg124□ctg659□ctg773□WAG-114F16  
ctg124□ctg659□ctg773□WAG-121C12  
ctg124□ctg659□ctg773□WAG-125B20  
ctg124□ctg659□ctg773□WAG-125H14  
ctg124□ctg659□ctg773□WAG-126P3  
ctg1240□ctg2438□□WAG-47L17  
ctg1240□ctg2438□ctg3159□WAG-21P13  
ctg1240□ctg2438□ctg3159□WAG-64E23  
ctg1240□ctg2438□ctg3159□WAG-111H2  
ctg1241□□□WAG-57B14  
ctg1241□ctg2948□ctg2922□WAG-16B20  
ctg1241□ctg2948□ctg2922□WAG-51M16  
ctg1241□ctg2948□ctg2922□WAG-108A18  
ctg1241□ctg2948□ctg2922□WAG-119I23  
ctg1241□ctg2948□ctg5289□WAG-58A24  
ctg1241□ctg2948□ctg5289□WAG-79L7  
ctg1242□ctg2441□□WAG-51C21  
ctg1242□ctg2441□ctg3165□WAG-82K20  
ctg1242□ctg2441□ctg3165□WAG-110L16  
ctg1242□ctg2441□ctg3165□WAG-120J4  
ctg1243□ctg2442□□WAG-20A11  
ctg1243□ctg2442□□WAG-34A23

ctg1243□ctg2442□ctg4310□WAG-20G16  
ctg1243□ctg2442□ctg4310□WAG-81J18  
ctg1243□ctg2442□ctg4310□WAG-91E11  
ctg1243□ctg2442□ctg5901□WAG-54M9  
ctg1243□ctg2442□ctg5901□WAG-91C8  
ctg1244□ctg2648□□WAG-64J8  
ctg1244□ctg2648□□WAG-73E24  
ctg1244□ctg2648□□WAG-106G3  
ctg1244□ctg2648□ctg3184□WAG-7A19  
ctg1244□ctg2648□ctg3184□WAG-8D15  
ctg1244□ctg2648□ctg3184□WAG-44A11  
ctg1244□ctg2648□ctg3184□WAG-48H15  
ctg1244□ctg2648□ctg3184□WAG-94M24  
ctg1244□ctg2648□ctg5693□WAG-18N4  
ctg1244□ctg2648□ctg5693□WAG-59H24  
ctg1245□□□WAG-46H12  
ctg1245□□□WAG-109P22  
ctg1245□ctg2846□ctg2835□WAG-17B1  
ctg1245□ctg2846□ctg2835□WAG-80N18  
ctg1245□ctg2846□ctg2835□WAG-103L23  
ctg1246□□□WAG-26I22  
ctg1246□ctg2852□□WAG-68N13  
ctg1246□ctg2852□□WAG-82B12  
ctg1246□ctg2852□ctg3880□WAG-33F2  
ctg1246□ctg2852□ctg3880□WAG-91M8  
ctg1246□ctg2852□ctg3880□WAG-120G14  
ctg1247□ctg3434□ctg3549□WAG-70G10  
ctg1247□ctg3434□ctg3549□WAG-86K11  
ctg1247□ctg3434□ctg3549□WAG-88L10  
ctg1247□ctg5294□ctg6133□WAG-64N14  
ctg1247□ctg5294□ctg6133□WAG-106F23  
ctg1248□□□WAG-113F9  
ctg1248□ctg2484□□WAG-45H3  
ctg1248□ctg2484□ctg3228□WAG-40L3  
ctg1248□ctg2484□ctg3228□WAG-96E11  
ctg1248□ctg2484□ctg3228□WAG-111N6  
ctg1248□ctg2484□ctg3228□WAG-122K15  
ctg1249□ctg2457□ctg2372□WAG-17A4  
ctg1249□ctg2457□ctg2372□WAG-19O1  
ctg1249□ctg2457□ctg2372□WAG-26D13  
ctg1249□ctg2457□ctg2372□WAG-71O5  
ctg125□ctg384□□WAG-43L1  
ctg125□ctg384□ctg291□WAG-26A2  
ctg125□ctg384□ctg291□WAG-66P22  
ctg125□ctg384□ctg291□WAG-90E11  
ctg125□ctg384□ctg291□WAG-102B18  
ctg125□ctg384□ctg291□WAG-105P12  
ctg125□ctg384□ctg291□WAG-119A6  
ctg125□ctg384□ctg291□WAG-127M13  
ctg1250□□□WAG-35B24  
ctg1250□□□WAG-55E23  
ctg1250□□□WAG-73O3  
ctg1250□□□WAG-81K3  
ctg1250□ctg4888□ctg5211□WAG-115I17  
ctg1250□ctg4888□ctg5211□WAG-115J15  
ctg1251□□□WAG-9D12

ctg1251□ctg3463□□WAG-25D9  
ctg1251□ctg3463□□WAG-122H12  
ctg1251□ctg3463□□WAG-130D1  
ctg1251□ctg3463□ctg6576□WAG-6A17  
ctg1251□ctg3463□ctg6576□WAG-43M14  
ctg1251□ctg3463□ctg6793□WAG-84H12  
ctg1251□ctg3463□ctg6793□WAG-93F7  
ctg1252□ctg2460□□WAG-A14  
ctg1252□ctg2460□□WAG-84L20  
ctg1252□ctg2460□ctg4032□WAG-43C14  
ctg1252□ctg2460□ctg4032□WAG-60L19  
ctg1253□□□WAG-114B4  
ctg1253□ctg3762□ctg3994□WAG-5O1  
ctg1253□ctg3762□ctg3994□WAG-79I5  
ctg1253□ctg3762□ctg3994□WAG-87O6  
ctg1253□ctg3762□ctg3994□WAG-98F23  
ctg1253□ctg3762□ctg3994□WAG-114B21  
ctg1254□ctg2978□□WAG-5P4  
ctg1254□ctg2978□□WAG-44J17  
ctg1254□ctg2978□□WAG-51A2  
ctg1254□ctg2978□□WAG-87F20  
ctg1254□ctg2978□□WAG-95M15  
ctg1254□ctg2978□□WAG-112B18  
ctg1254□ctg2978□ctg4881□WAG-47O9  
ctg1254□ctg2978□ctg4881□WAG-65A14  
ctg1254□ctg2978□ctg5893□WAG-78C24  
ctg1254□ctg2978□ctg5893□WAG-108H24  
ctg1255□□□WAG-89H8  
ctg1255□ctg2685□□WAG-114K22  
ctg1255□ctg2685□ctg4525□WAG-42O23  
ctg1255□ctg2685□ctg4525□WAG-70G21  
ctg1255□ctg2685□ctg4745□WAG-76B11  
ctg1255□ctg2685□ctg4745□WAG-105O6  
ctg1255□ctg3835□□WAG-64G13  
ctg1255□ctg3835□□WAG-94F17  
ctg1255□ctg3835□ctg5448□WAG-21H7  
ctg1255□ctg3835□ctg5448□WAG-82F24  
ctg1256□ctg2471□□WAG-47J3  
ctg1256□ctg2471□□WAG-71D3  
ctg1256□ctg2471□ctg4164□WAG-42J6  
ctg1256□ctg2471□ctg4164□WAG-79G14  
ctg1256□ctg2471□ctg4164□WAG-99E14  
ctg1257□□□WAG-20D17  
ctg1257□□□WAG-53P3  
ctg1257□ctg2472□□WAG-83G9  
ctg1257□ctg2472□ctg3805□WAG-19B15  
ctg1257□ctg2472□ctg3805□WAG-23F19  
ctg1257□ctg2472□ctg3805□WAG-91L20  
ctg1257□ctg2472□ctg3805□WAG-106A19  
ctg1258□□□WAG-7D5  
ctg1258□□□WAG-53C11  
ctg1258□ctg2879□□WAG-68N12  
ctg1258□ctg2879□ctg3763□WAG-33A23  
ctg1258□ctg2879□ctg3763□WAG-43J16  
ctg1258□ctg2879□ctg3763□WAG-55D13  
ctg1259□ctg2476□□WAG-35J19

ctg1259□ctg2476□ctg2633□WAG-37F18  
ctg1259□ctg2476□ctg2633□WAG-51B24  
ctg1259□ctg2476□ctg2633□WAG-102F7  
ctg1259□ctg2476□ctg2633□WAG-127B1  
ctg126□ctg509□ctg714□WAG-19O16  
ctg126□ctg509□ctg714□WAG-33E15  
ctg126□ctg509□ctg714□WAG-46M14  
ctg126□ctg509□ctg714□WAG-68L15  
ctg126□ctg509□ctg714□WAG-72O13  
ctg126□ctg509□ctg714□WAG-77E10  
ctg126□ctg509□ctg714□WAG-78C4  
ctg126□ctg509□ctg714□WAG-102N1  
ctg126□ctg509□ctg714□WAG-104D23  
ctg126□ctg509□ctg714□WAG-118A19  
ctg126□ctg509□ctg714□WAG-129N15  
ctg1260□ctg2993□□WAG-17M10  
ctg1260□ctg2993□□WAG-71D8  
ctg1260□ctg2993□□WAG-123D23  
ctg1260□ctg2993□ctg5079□WAG-20F20  
ctg1260□ctg2993□ctg5079□WAG-21P14  
ctg1261□□□WAG-64L8  
ctg1261□□□WAG-107O14  
ctg1261□ctg2899□ctg2883□WAG-119P16  
ctg1261□ctg2899□ctg2883□WAG-120N8  
ctg1262□ctg2485□ctg2410□WAG-4K1  
ctg1262□ctg2485□ctg2410□WAG-89H14  
ctg1262□ctg2485□ctg2410□WAG-97C21  
ctg1263□□□WAG-1B13  
ctg1263□□□WAG-62M17  
ctg1263□ctg4005□□WAG-110N17  
ctg1263□ctg4005□ctg5337□WAG-101H12  
ctg1263□ctg4005□ctg5337□WAG-117E2  
ctg1263□ctg6235□□WAG-54I18  
ctg1263□ctg6235□□WAG-92O7  
ctg1264□□□WAG-13G3  
ctg1264□ctg2491□□WAG-52P11  
ctg1264□ctg2491□□WAG-70M19  
ctg1264□ctg2491□ctg3110□WAG-25G8  
ctg1264□ctg2491□ctg3110□WAG-41O22  
ctg1264□ctg2491□ctg3110□WAG-100N13  
ctg1265□ctg2643□□WAG-6J12  
ctg1265□ctg2643□□WAG-84N9  
ctg1265□ctg2643□ctg5467□WAG-6B1  
ctg1265□ctg2643□ctg5467□WAG-38C22  
ctg1265□ctg2643□ctg6261□WAG-63O13  
ctg1265□ctg2643□ctg6261□WAG-89B5  
ctg1265□ctg4055□ctg4313□WAG-75G19  
ctg1265□ctg4055□ctg4313□WAG-128A21  
ctg1265□ctg5149□ctg5810□WAG-52H5  
ctg1265□ctg5149□ctg5810□WAG-79G10  
ctg1266□□□WAG-59N16  
ctg1266□ctg2492□□WAG-37J2  
ctg1266□ctg2492□ctg3137□WAG-19H13  
ctg1266□ctg2492□ctg3137□WAG-52C11  
ctg1266□ctg2492□ctg3137□WAG-110N21  
ctg1266□ctg5122□ctg5742□WAG-125E8



ctg1266□ctg5122□ctg5742□WAG-129G3  
ctg1267□□□WAG-3F7  
ctg1267□□□WAG-5G24  
ctg1267□□□WAG-27D10  
ctg1267□□□WAG-36N10  
ctg1267□ctg2502□□WAG-48D22  
ctg1267□ctg2502□□WAG-109H20  
ctg1267□ctg2502□ctg3120□WAG-3N18  
ctg1267□ctg2502□ctg3120□WAG-14N20  
ctg1267□ctg2502□ctg3120□WAG-116D19  
ctg1268□□□WAG-53N9  
ctg1268□ctg2495□ctg2420□WAG-29B5  
ctg1268□ctg2495□ctg2420□WAG-62K5  
ctg1268□ctg2495□ctg2420□WAG-76L2  
ctg1268□ctg2495□ctg2420□WAG-112F10  
ctg1269□ctg2496□ctg2423□WAG-15N9  
ctg1269□ctg2496□ctg2423□WAG-27L1  
ctg1269□ctg2496□ctg2423□WAG-78M23  
ctg1269□ctg2496□ctg2423□WAG-114M4  
ctg1269□ctg2496□ctg2423□WAG-120P17  
ctg127□□□WAG-A1  
ctg127□□□WAG-27C24  
ctg127□□□WAG-96A8  
ctg127□ctg682□□WAG-128F6  
ctg127□ctg682□ctg6043□WAG-18N11  
ctg127□ctg682□ctg6043□WAG-58G4  
ctg127□ctg682□ctg6951□WAG-51A18  
ctg127□ctg682□ctg6951□WAG-58F4  
ctg127□ctg682□ctg917□WAG-19N4  
ctg127□ctg682□ctg917□WAG-21O4  
ctg127□ctg682□ctg917□WAG-53C1  
ctg127□ctg682□ctg917□WAG-67B7  
ctg127□ctg682□ctg917□WAG-79L4  
ctg127□ctg682□ctg917□WAG-82L1  
ctg127□ctg682□ctg917□WAG-111L19  
ctg127□ctg682□ctg917□WAG-117J22  
ctg127□ctg682□ctg917□WAG-130A21  
ctg1270□□□WAG-14O15  
ctg1270□□□WAG-21I7  
ctg1270□□□WAG-116A1  
ctg1270□ctg3415□ctg3519□WAG-53O12  
ctg1270□ctg3415□ctg3519□WAG-113P14  
ctg1270□ctg3415□ctg3519□WAG-123G4  
ctg1271□□□WAG-20C17  
ctg1271□□□WAG-115K12  
ctg1271□□□WAG-119B8  
ctg1271□□□WAG-120L15  
ctg1271□ctg3443□ctg3555□WAG-16B17  
ctg1271□ctg3443□ctg3555□WAG-90O19  
ctg1271□ctg3443□ctg3555□WAG-101J5  
ctg1272□ctg3018□ctg3015□WAG-63P14  
ctg1272□ctg3018□ctg3015□WAG-68F14  
ctg1272□ctg3018□ctg3015□WAG-80N17  
ctg1272□ctg3018□ctg3015□WAG-110H18  
ctg1272□ctg4814□ctg5074□WAG-40A23  
ctg1272□ctg4814□ctg5074□WAG-57F7

ctg1273□□□WAG-2F16  
ctg1273□□□WAG-23I1  
ctg1273□ctg3399□ctg3498□WAG-10H20  
ctg1273□ctg3399□ctg3498□WAG-69A12  
ctg1273□ctg3399□ctg3498□WAG-98L23  
ctg1273□ctg5170□ctg5866□WAG-40P10  
ctg1273□ctg5170□ctg5866□WAG-41I11  
ctg1273□ctg5735□□WAG-55G19  
ctg1273□ctg5735□□WAG-63L12  
ctg1274□□□WAG-66P8  
ctg1274□□□WAG-99I24  
ctg1274□□□WAG-107K6  
ctg1274□ctg3022□□WAG-11F22  
ctg1274□ctg3022□ctg3943□WAG-77K7  
ctg1274□ctg3022□ctg3943□WAG-108K15  
ctg1274□ctg3022□ctg3943□WAG-127A22  
ctg1274□ctg3022□ctg3943□WAG-130G3  
ctg1275□□□WAG-27J16  
ctg1275□□□WAG-100E5  
ctg1275□ctg2930□□WAG-46K24  
ctg1275□ctg2930□□WAG-53L18  
ctg1275□ctg2930□ctg3817□WAG-10I14  
ctg1275□ctg2930□ctg3817□WAG-18F22  
ctg1275□ctg2930□ctg3817□WAG-51L8  
ctg1276□□□WAG-103K8  
ctg1276□ctg2510□ctg2438□WAG-41N8  
ctg1276□ctg2510□ctg2438□WAG-59L9  
ctg1276□ctg2510□ctg2438□WAG-110J5  
ctg1276□ctg2510□ctg2438□WAG-112G9  
ctg1277□□□WAG-27I16  
ctg1277□ctg3951□ctg5408□WAG-58C16  
ctg1277□ctg3951□ctg5408□WAG-116P11  
ctg1277□ctg3951□ctg5752□WAG-7P23  
ctg1277□ctg3951□ctg5752□WAG-76K11  
ctg1277□ctg5306□ctg6156□WAG-29I3  
ctg1277□ctg5306□ctg6156□WAG-98A24  
ctg1278□□□WAG-15D2  
ctg1278□□□WAG-73C12  
ctg1278□ctg2512□□WAG-25I21  
ctg1278□ctg2512□ctg3266□WAG-55B24  
ctg1278□ctg2512□ctg3266□WAG-61A19  
ctg1278□ctg2512□ctg3266□WAG-120L1  
ctg1279□□□WAG-16A13  
ctg1279□ctg2515□ctg3774□WAG-66A7  
ctg1279□ctg2515□ctg3774□WAG-90F18  
ctg1279□ctg2515□ctg3774□WAG-99F21  
ctg1279□ctg2515□ctg3774□WAG-111B1  
ctg1279□ctg2515□ctg6140□WAG-3P17  
ctg1279□ctg2515□ctg6140□WAG-46A12  
ctg128□□□WAG-20B4  
ctg128□□□WAG-61H4  
ctg128□ctg508□□WAG-56D8  
ctg128□ctg508□□WAG-93J17  
ctg128□ctg508□ctg547□WAG-40G11  
ctg128□ctg508□ctg547□WAG-58K5  
ctg128□ctg508□ctg547□WAG-113H10

ctg128□ctg508□ctg547□WAG-122I19  
ctg128□ctg508□ctg547□WAG-127G18  
ctg128□ctg5770□□WAG-54O24  
ctg128□ctg5770□□WAG-85B7  
ctg1280□ctg3030□□WAG-45O10  
ctg1280□ctg3030□□WAG-66E6  
ctg1280□ctg3030□ctg3319□WAG-59J18  
ctg1280□ctg3030□ctg3319□WAG-77H11  
ctg1280□ctg3030□ctg3319□WAG-119L10  
ctg1281□ctg2946□ctg2921□WAG-12I19  
ctg1281□ctg2946□ctg2921□WAG-18N6  
ctg1281□ctg2946□ctg2921□WAG-20J19  
ctg1281□ctg2946□ctg2921□WAG-44D19  
ctg1282□□□WAG-56B4  
ctg1282□ctg2520□ctg2448□WAG-30M17  
ctg1282□ctg2520□ctg2448□WAG-47D23  
ctg1282□ctg2520□ctg2448□WAG-111A24  
ctg1283□ctg2522□ctg2451□WAG-9A2  
ctg1283□ctg2522□ctg2451□WAG-52I20  
ctg1283□ctg2522□ctg2451□WAG-108D4  
ctg1283□ctg2522□ctg2451□WAG-122P14  
ctg1284□ctg3036□ctg3546□WAG-37D24  
ctg1284□ctg3036□ctg3546□WAG-72N2  
ctg1284□ctg3036□ctg3546□WAG-128L3  
ctg1284□ctg3036□ctg6884□WAG-20M21  
ctg1284□ctg3036□ctg6884□WAG-45O15  
ctg1285□ctg3522□□WAG-1G21  
ctg1285□ctg3522□ctg3661□WAG-66H11  
ctg1285□ctg3522□ctg3661□WAG-88A7  
ctg1285□ctg3522□ctg3661□WAG-90H20  
ctg1285□ctg5006□ctg5471□WAG-21F13  
ctg1285□ctg5006□ctg5471□WAG-84B16  
ctg1286□□□WAG-85K16  
ctg1286□ctg2956□□WAG-92M10  
ctg1286□ctg2956□ctg2936□WAG-37F23  
ctg1286□ctg2956□ctg2936□WAG-75I19  
ctg1286□ctg2956□ctg2936□WAG-113O21  
ctg1287□ctg2531□ctg2457□WAG-25M11  
ctg1287□ctg2531□ctg2457□WAG-41J2  
ctg1287□ctg2531□ctg2457□WAG-71D18  
ctg1288□ctg2533□□WAG-52K5  
ctg1288□ctg2533□□WAG-66O4  
ctg1288□ctg2533□ctg4398□WAG-79C20  
ctg1288□ctg2533□ctg4398□WAG-130L9  
ctg1289□ctg2967□ctg2946□WAG-47E21  
ctg1289□ctg2967□ctg2946□WAG-69O9  
ctg1289□ctg2967□ctg2946□WAG-102A8  
ctg1289□ctg6213□□WAG-4F5  
ctg1289□ctg6213□□WAG-123A19  
ctg129□□□WAG-90F13  
ctg129□□□WAG-106D11  
ctg129□ctg6514□□WAG-60G10  
ctg129□ctg6514□□WAG-80J7  
ctg129□ctg918□□WAG-15H6  
ctg129□ctg918□□WAG-103N20  
ctg129□ctg918□□WAG-107F15

ctg129□ctg918□□WAG-113K21  
ctg129□ctg918□ctg1067□WAG-15I9  
ctg129□ctg918□ctg1067□WAG-20K10  
ctg129□ctg918□ctg1067□WAG-43P12  
ctg129□ctg918□ctg1067□WAG-56K6  
ctg129□ctg918□ctg1067□WAG-83J23  
ctg129□ctg918□ctg1067□WAG-105P22  
ctg129□ctg918□ctg1720□WAG-15H14  
ctg129□ctg918□ctg1720□WAG-45D9  
ctg129□ctg918□ctg1720□WAG-46F14  
ctg129□ctg918□ctg1720□WAG-51N8  
ctg129□ctg918□ctg1720□WAG-78D9  
ctg129□ctg918□ctg1720□WAG-100O2  
ctg129□ctg918□ctg1720□WAG-117K17  
ctg129□ctg918□ctg1720□WAG-121G20  
ctg129□ctg962□ctg814□WAG-41C2  
ctg129□ctg962□ctg814□WAG-61E15  
ctg129□ctg962□ctg814□WAG-74I10  
ctg129□ctg962□ctg814□WAG-104I12  
ctg129□ctg962□ctg814□WAG-127H18  
ctg1290□ctg2641□ctg2600□WAG-17G16  
ctg1290□ctg2641□ctg2600□WAG-24C2  
ctg1290□ctg2641□ctg2600□WAG-93D8  
ctg1290□ctg2641□ctg2600□WAG-130O20  
ctg1291□ctg2537□□WAG-62E2  
ctg1291□ctg2537□ctg3168□WAG-56N12  
ctg1291□ctg2537□ctg3168□WAG-63B20  
ctg1291□ctg2537□ctg3168□WAG-94H12  
ctg1292□□□WAG-98L2  
ctg1292□ctg3672□ctg3863□WAG-26D14  
ctg1292□ctg3672□ctg3863□WAG-44O3  
ctg1292□ctg3672□ctg3863□WAG-117C19  
ctg1292□ctg4316□ctg4510□WAG-17K5  
ctg1292□ctg4316□ctg4510□WAG-116P24  
ctg1292□ctg4316□ctg6465□WAG-16J16  
ctg1292□ctg4316□ctg6465□WAG-89K11  
ctg1293□□□WAG-130H12  
ctg1293□ctg3163□ctg3183□WAG-30N15  
ctg1293□ctg3163□ctg3183□WAG-62F2  
ctg1293□ctg3163□ctg3183□WAG-92K24  
ctg1293□ctg3615□ctg3797□WAG-25I15  
ctg1293□ctg3615□ctg3797□WAG-34C16  
ctg1293□ctg3615□ctg3797□WAG-112L2  
ctg1293□ctg5685□□WAG-31P6  
ctg1293□ctg5685□□WAG-106O12  
ctg1294□□□WAG-58L12  
ctg1294□ctg2546□ctg2474□WAG-51D2  
ctg1294□ctg2546□ctg2474□WAG-51M5  
ctg1294□ctg2546□ctg2474□WAG-78J11  
ctg1295□□□WAG-24D13  
ctg1295□ctg3067□ctg3070□WAG-57B24  
ctg1295□ctg3067□ctg3070□WAG-103M13  
ctg1295□ctg3067□ctg3070□WAG-128B19  
ctg1296□ctg2678□□WAG-17K12  
ctg1296□ctg2678□ctg3072□WAG-31N16  
ctg1296□ctg2678□ctg3072□WAG-70A18

ctg1296□ctg2678□ctg3072□WAG-90P10  
ctg1297□□□WAG-P5  
ctg1297□□□WAG-35L7  
ctg1297□□□WAG-45J15  
ctg1297□ctg3833□ctg4095□WAG-71N13  
ctg1297□ctg3833□ctg4095□WAG-105N3  
ctg1297□ctg3833□ctg4095□WAG-126N8  
ctg1297□ctg5194□ctg5907□WAG-12M7  
ctg1297□ctg5194□ctg5907□WAG-81H14  
ctg1298□□□WAG-16O5  
ctg1298□□□WAG-94C5  
ctg1298□ctg2983□□WAG-46B5  
ctg1298□ctg2983□□WAG-55E21  
ctg1298□ctg2983□ctg5334□WAG-98P2  
ctg1298□ctg2983□ctg5334□WAG-109N16  
ctg1299□□□WAG-60E8  
ctg1299□ctg2984□□WAG-28P6  
ctg1299□ctg2984□ctg3296□WAG-12D10  
ctg1299□ctg2984□ctg3296□WAG-13A16  
ctg1299□ctg2984□ctg3296□WAG-74M5  
ctg1299□ctg2984□ctg3296□WAG-101M15  
ctg13□□□WAG-25G20  
ctg13□□□WAG-44A4  
ctg13□ctg54□□WAG-33A11  
ctg13□ctg54□ctg5499□WAG-95D18  
ctg13□ctg54□ctg5499□WAG-100F16  
ctg13□ctg54□ctg64□WAG-22L16  
ctg13□ctg54□ctg64□WAG-23L12  
ctg13□ctg54□ctg64□WAG-33D19  
ctg13□ctg54□ctg64□WAG-34M23  
ctg13□ctg54□ctg64□WAG-41F22  
ctg13□ctg54□ctg64□WAG-48I24  
ctg13□ctg54□ctg64□WAG-75H7  
ctg13□ctg54□ctg64□WAG-80G15  
ctg13□ctg54□ctg64□WAG-87K21  
ctg13□ctg54□ctg64□WAG-90G12  
ctg13□ctg54□ctg64□WAG-99M4  
ctg13□ctg54□ctg64□WAG-113E14  
ctg13□ctg54□ctg64□WAG-117G2  
ctg13□ctg54□ctg64□WAG-121A23  
ctg130□ctg5047□ctg5565□WAG-114H2  
ctg130□ctg5047□ctg5565□WAG-118F22  
ctg130□ctg556□□WAG-93D22  
ctg130□ctg556□ctg771□WAG-8B4  
ctg130□ctg556□ctg771□WAG-18J24  
ctg130□ctg556□ctg771□WAG-21L15  
ctg130□ctg556□ctg771□WAG-40B4  
ctg130□ctg556□ctg771□WAG-45F20  
ctg130□ctg556□ctg771□WAG-68C15  
ctg130□ctg556□ctg771□WAG-83A15  
ctg130□ctg556□ctg771□WAG-88F7  
ctg130□ctg556□ctg771□WAG-95P6  
ctg130□ctg556□ctg771□WAG-104J4  
ctg130□ctg556□ctg771□WAG-111I13  
ctg130□ctg556□ctg771□WAG-125J6  
ctg130□ctg556□ctg771□WAG-125O7

ctg130□ctg556□ctg771□WAG-127G6  
ctg1300□□□WAG-33A18  
ctg1300□□□WAG-50L14  
ctg1300□ctg3073□□WAG-29D11  
ctg1300□ctg3073□ctg3895□WAG-75N10  
ctg1300□ctg3073□ctg3895□WAG-89M7  
ctg1300□ctg3073□ctg3895□WAG-102N9  
ctg1300□ctg3073□ctg5271□WAG-38P1  
ctg1300□ctg3073□ctg5271□WAG-122F9  
ctg1300□ctg6167□□WAG-42N6  
ctg1300□ctg6167□□WAG-75F22  
ctg1301□ctg2554□ctg2487□WAG-3B3  
ctg1301□ctg2554□ctg2487□WAG-64G5  
ctg1301□ctg2554□ctg2487□WAG-72D10  
ctg1302□□□WAG-2M3  
ctg1302□□□WAG-30F12  
ctg1302□□□WAG-124G3  
ctg1302□ctg3572□□WAG-58H11  
ctg1302□ctg3572□□WAG-100L17  
ctg1302□ctg3572□ctg6515□WAG-23H14  
ctg1302□ctg3572□ctg6515□WAG-115A13  
ctg1302□ctg5345□ctg6273□WAG-70P8  
ctg1302□ctg5345□ctg6273□WAG-106N17  
ctg1303□ctg2557□□WAG-90A23  
ctg1303□ctg2557□ctg3330□WAG-24G10  
ctg1303□ctg2557□ctg3330□WAG-50M9  
ctg1303□ctg2557□ctg3330□WAG-119K23  
ctg1304□□□WAG-4N14  
ctg1304□□□WAG-67D18  
ctg1304□ctg3488□ctg3605□WAG-44M4  
ctg1304□ctg3488□ctg3605□WAG-57J20  
ctg1304□ctg4928□ctg5281□WAG-9E2  
ctg1304□ctg4928□ctg5281□WAG-103J2  
ctg1305□ctg2560□ctg2496□WAG-12M14  
ctg1305□ctg2560□ctg2496□WAG-28L22  
ctg1305□ctg2560□ctg2496□WAG-74F18  
ctg1305□ctg2560□ctg2496□WAG-83M2  
ctg1306□□□WAG-82C16  
ctg1306□□□WAG-121H18  
ctg1306□ctg3474□□WAG-94E1  
ctg1306□ctg3474□□WAG-121F24  
ctg1306□ctg3474□ctg4563□WAG-42F4  
ctg1306□ctg3474□ctg4563□WAG-55F12  
ctg1306□ctg4861□ctg5147□WAG-49O16  
ctg1306□ctg4861□ctg5147□WAG-97F9  
ctg1307□□□WAG-54K15  
ctg1307□ctg3700□□WAG-78A9  
ctg1307□ctg3700□ctg6047□WAG-9H20  
ctg1307□ctg3700□ctg6047□WAG-71M17  
ctg1307□ctg3700□ctg6847□WAG-31G7  
ctg1307□ctg3700□ctg6847□WAG-121H2  
ctg1308□□□WAG-41L20  
ctg1308□ctg2999□□WAG-85P9  
ctg1308□ctg2999□ctg4090□WAG-28H24  
ctg1308□ctg2999□ctg4090□WAG-113L1  
ctg1309□□□WAG-21C18

ctg1309□ctg3953□□WAG-112P17  
ctg1309□ctg3953□ctg4225□WAG-11B22  
ctg1309□ctg3953□ctg4225□WAG-16G21  
ctg1309□ctg3953□ctg4225□WAG-113C11  
ctg1309□ctg5417□ctg6434□WAG-15F10  
ctg1309□ctg5417□ctg6434□WAG-105P4  
ctg1309□ctg6359□□WAG-25N13  
ctg1309□ctg6359□□WAG-39B10  
ctg131□□□WAG-36O11  
ctg131□ctg414□□WAG-3G22  
ctg131□ctg414□□WAG-7I13  
ctg131□ctg414□□WAG-73C17  
ctg131□ctg414□ctg417□WAG-8D14  
ctg131□ctg414□ctg417□WAG-35F18  
ctg131□ctg414□ctg417□WAG-79J19  
ctg131□ctg414□ctg417□WAG-96L10  
ctg131□ctg414□ctg417□WAG-101O18  
ctg131□ctg414□ctg417□WAG-106N13  
ctg131□ctg414□ctg417□WAG-109B5  
ctg131□ctg414□ctg417□WAG-127M6  
ctg131□ctg467□□WAG-54K6  
ctg131□ctg467□ctg643□WAG-23O1  
ctg131□ctg467□ctg643□WAG-40A15  
ctg131□ctg467□ctg643□WAG-55K9  
ctg131□ctg467□ctg643□WAG-60B18  
ctg131□ctg467□ctg643□WAG-62F22  
ctg131□ctg467□ctg643□WAG-92B3  
ctg131□ctg467□ctg643□WAG-93B17  
ctg131□ctg467□ctg643□WAG-103M21  
ctg131□ctg467□ctg643□WAG-109F6  
ctg131□ctg467□ctg643□WAG-116M19  
ctg131□ctg467□ctg643□WAG-117A11  
ctg131□ctg467□ctg643□WAG-117M7  
ctg131□ctg467□ctg643□WAG-125B7  
ctg131□ctg6330□□WAG-100A24  
ctg131□ctg6330□□WAG-130E24  
ctg1310□ctg2565□□WAG-5A17  
ctg1310□ctg2565□ctg3203□WAG-45F14  
ctg1310□ctg2565□ctg3203□WAG-49K3  
ctg1310□ctg2565□ctg3203□WAG-106P20  
ctg1311□ctg2567□ctg2514□WAG-74J14  
ctg1311□ctg2567□ctg2514□WAG-82J16  
ctg1311□ctg2567□ctg2514□WAG-116M21  
ctg1312□□□WAG-98J12  
ctg1312□ctg2568□□WAG-77K6  
ctg1312□ctg2568□□WAG-113G24  
ctg1312□ctg2568□ctg2521□WAG-5A10  
ctg1312□ctg2568□ctg2521□WAG-16M13  
ctg1312□ctg2568□ctg2521□WAG-26P15  
ctg1312□ctg2568□ctg2521□WAG-39P2  
ctg1312□ctg6029□□WAG-94B21  
ctg1312□ctg6029□□WAG-107D3  
ctg1313□□□WAG-H17  
ctg1313□□□WAG-67E14  
ctg1313□ctg3102□□WAG-58E11  
ctg1313□ctg3102□ctg3103□WAG-23K4

ctg1313□ctg3102□ctg3103□WAG-73H12  
ctg1313□ctg3102□ctg3103□WAG-74K2  
ctg1314□ctg3010□ctg4108□WAG-63A7  
ctg1314□ctg3010□ctg4108□WAG-119K5  
ctg1314□ctg3010□ctg5352□WAG-32P4  
ctg1314□ctg3010□ctg5352□WAG-73L10  
ctg1315□□□WAG-115O8  
ctg1315□ctg3300□□WAG-35I9  
ctg1315□ctg3300□□WAG-113N17  
ctg1315□ctg3300□ctg4867□WAG-41N4  
ctg1315□ctg3300□ctg4867□WAG-126K7  
ctg1315□ctg3300□ctg6795□WAG-55N1  
ctg1315□ctg3300□ctg6795□WAG-91C15  
ctg1316□□□WAG-101J14  
ctg1316□ctg3106□□WAG-47D3  
ctg1316□ctg3106□ctg3942□WAG-8D16  
ctg1316□ctg3106□ctg3942□WAG-99A22  
ctg1316□ctg3106□ctg3942□WAG-121H4  
ctg1317□ctg2574□ctg2527□WAG-67B12  
ctg1317□ctg2574□ctg2527□WAG-80J5  
ctg1317□ctg2574□ctg2527□WAG-81E17  
ctg1318□□□WAG-111G18  
ctg1318□□□WAG-127H16  
ctg1318□ctg3490□ctg3616□WAG-1C18  
ctg1318□ctg3490□ctg3616□WAG-57H19  
ctg1318□ctg3490□ctg3616□WAG-58N3  
ctg1319□□□WAG-104F19  
ctg1319□□□WAG-118L1  
ctg1319□ctg3614□ctg4705□WAG-18F23  
ctg1319□ctg3614□ctg4705□WAG-102O1  
ctg1319□ctg3614□ctg5148□WAG-30B14  
ctg1319□ctg3614□ctg5148□WAG-48A3  
ctg132□□□WAG-65O14  
ctg132□□□WAG-70E19  
ctg132□ctg1160□□WAG-102M22  
ctg132□ctg1160□ctg998□WAG-9L7  
ctg132□ctg1160□ctg998□WAG-58G19  
ctg132□ctg1160□ctg998□WAG-74D5  
ctg132□ctg1160□ctg998□WAG-119P20  
ctg132□ctg1160□ctg998□WAG-123H20  
ctg132□ctg1260□□WAG-60J20  
ctg132□ctg1260□ctg1106□WAG-48K17  
ctg132□ctg1260□ctg1106□WAG-60B16  
ctg132□ctg1260□ctg1106□WAG-81L12  
ctg132□ctg1260□ctg1106□WAG-106G20  
ctg132□ctg2378□ctg2593□WAG-60M15  
ctg132□ctg2378□ctg2593□WAG-78G18  
ctg132□ctg2378□ctg2593□WAG-87I7  
ctg132□ctg2378□ctg2593□WAG-103K5  
ctg132□ctg2378□ctg2593□WAG-111G14  
ctg132□ctg2378□ctg2593□WAG-116P17  
ctg132□ctg401□ctg376□WAG-8E18  
ctg132□ctg401□ctg376□WAG-11N12  
ctg132□ctg401□ctg376□WAG-37E7  
ctg132□ctg401□ctg376□WAG-40K19  
ctg132□ctg401□ctg376□WAG-54H24



ctg132□ctg401□ctg376□WAG-62A8  
ctg132□ctg401□ctg376□WAG-70G8  
ctg132□ctg401□ctg376□WAG-73M1  
ctg132□ctg401□ctg376□WAG-80E6  
ctg132□ctg401□ctg376□WAG-82N21  
ctg132□ctg401□ctg376□WAG-97P7  
ctg132□ctg401□ctg376□WAG-103O11  
ctg132□ctg401□ctg376□WAG-108H8  
ctg132□ctg401□ctg376□WAG-121C5  
ctg1320□ctg2583□ctg2545□WAG-15L20  
ctg1320□ctg2583□ctg2545□WAG-39J23  
ctg1320□ctg2583□ctg2545□WAG-42D11  
ctg1320□ctg2583□ctg2545□WAG-44K13  
ctg1321□□□WAG-48C21  
ctg1321□□□WAG-48E1  
ctg1321□ctg3499□ctg3627□WAG-18O9  
ctg1321□ctg3499□ctg3627□WAG-38D11  
ctg1321□ctg3499□ctg3627□WAG-40N2  
ctg1322□□□WAG-2C16  
ctg1322□□□WAG-37I4  
ctg1322□□□WAG-114O21  
ctg1322□ctg3624□ctg3809□WAG-21B13  
ctg1322□ctg3624□ctg3809□WAG-105H14  
ctg1322□ctg5722□ctg6875□WAG-65C5  
ctg1322□ctg5722□ctg6875□WAG-86P18  
ctg1323□□□WAG-9L23  
ctg1323□□□WAG-14D15  
ctg1323□□□WAG-51D4  
ctg1323□□□WAG-98G13  
ctg1323□□□WAG-116K8  
ctg1323□ctg3125□ctg3126□WAG-53J10  
ctg1323□ctg3125□ctg3126□WAG-112H18  
ctg1323□ctg3125□ctg3126□WAG-113C24  
ctg1324□□□WAG-41E6  
ctg1324□□□WAG-91F10  
ctg1324□□□WAG-116A2  
ctg1324□ctg2588□□WAG-37K12  
ctg1324□ctg2588□ctg2550□WAG-32C8  
ctg1324□ctg2588□ctg2550□WAG-74D12  
ctg1324□ctg2588□ctg2550□WAG-77C3  
ctg1324□ctg2588□ctg2550□WAG-115H2  
ctg1325□ctg3023□ctg3021□WAG-24I19  
ctg1325□ctg3023□ctg3021□WAG-86M11  
ctg1325□ctg3023□ctg3021□WAG-129N1  
ctg1325□ctg5043□ctg5558□WAG-46O14  
ctg1325□ctg5043□ctg5558□WAG-78A18  
ctg1325□ctg6132□□WAG-69B15  
ctg1325□ctg6132□□WAG-89F13  
ctg1326□ctg2589□ctg2551□WAG-66J18  
ctg1326□ctg2589□ctg2551□WAG-106M8  
ctg1326□ctg2589□ctg2551□WAG-126H19  
ctg1326□ctg2589□ctg2551□WAG-129A22  
ctg1326□ctg2589□ctg3655□WAG-52A17  
ctg1326□ctg2589□ctg3655□WAG-112B23  
ctg1326□ctg2589□ctg3655□WAG-129K2  
ctg1326□ctg5646□□WAG-21P17

ctg1326□ctg5646□□WAG-66C4  
ctg1327□ctg2592□ctg2555□WAG-74H24  
ctg1327□ctg2592□ctg2555□WAG-102O12  
ctg1327□ctg2592□ctg2555□WAG-111B3  
ctg1328□ctg2594□ctg2557□WAG-43B23  
ctg1328□ctg2594□ctg2557□WAG-85K7  
ctg1328□ctg2594□ctg2557□WAG-126M12  
ctg1329□□□WAG-107O20  
ctg1329□ctg2595□□WAG-78F21  
ctg1329□ctg2595□□WAG-107A18  
ctg1329□ctg2595□ctg3380□WAG-21D1  
ctg1329□ctg2595□ctg3380□WAG-37B3  
ctg1329□ctg2595□ctg3380□WAG-92F14  
ctg133□ctg2287□ctg2191□WAG-83F4  
ctg133□ctg2287□ctg2191□WAG-85A5  
ctg133□ctg2287□ctg2191□WAG-104I20  
ctg133□ctg487□ctg707□WAG-40G1  
ctg133□ctg487□ctg707□WAG-70B9  
ctg133□ctg487□ctg707□WAG-74N8  
ctg133□ctg487□ctg707□WAG-86D19  
ctg133□ctg487□ctg707□WAG-96D3  
ctg133□ctg487□ctg707□WAG-99E12  
ctg133□ctg487□ctg707□WAG-115H1  
ctg133□ctg487□ctg707□WAG-123G5  
ctg1330□□□WAG-13N22  
ctg1330□ctg4284□□WAG-66A23  
ctg1330□ctg4284□□WAG-69L19  
ctg1330□ctg4284□□WAG-82G14  
ctg1330□ctg4284□□WAG-125B6  
ctg1330□ctg5362□ctg6303□WAG-3B15  
ctg1330□ctg5362□ctg6303□WAG-108B10  
ctg1331□□□WAG-3G9  
ctg1331□□□WAG-61D3  
ctg1331□ctg3738□□WAG-52G14  
ctg1331□ctg3738□ctg4903□WAG-50J9  
ctg1331□ctg3738□ctg4903□WAG-89A14  
ctg1332□□□WAG-34F5  
ctg1332□ctg2693□ctg2676□WAG-2P11  
ctg1332□ctg2693□ctg2676□WAG-62K10  
ctg1332□ctg2693□ctg2676□WAG-101O6  
ctg1332□ctg2693□ctg2676□WAG-115C1  
ctg1332□ctg6360□□WAG-14A23  
ctg1332□ctg6360□□WAG-35F6  
ctg1333□□□WAG-46L1  
ctg1333□□□WAG-74B7  
ctg1333□□□WAG-123P7  
ctg1333□ctg3646□ctg4744□WAG-77J9  
ctg1333□ctg3646□ctg4744□WAG-81K2  
ctg1333□ctg3646□ctg6858□WAG-56N24  
ctg1333□ctg3646□ctg6858□WAG-104D24  
ctg1334□ctg2605□ctg2571□WAG-24O20  
ctg1334□ctg2605□ctg2571□WAG-56C16  
ctg1334□ctg2605□ctg2571□WAG-80F10  
ctg1335□ctg3054□ctg4007□WAG-56N1  
ctg1335□ctg3054□ctg4007□WAG-116G9  
ctg1335□ctg3054□ctg5548□WAG-10B3

ctg1335□ctg3054□ctg5548□WAG-89F12  
ctg1335□ctg5227□ctg5987□WAG-83A10  
ctg1335□ctg5227□ctg5987□WAG-130M21  
ctg1336□□□WAG-16O22  
ctg1336□□□WAG-26N17  
ctg1336□ctg3145□ctg3160□WAG-49K13  
ctg1336□ctg3145□ctg3160□WAG-81I8  
ctg1336□ctg3145□ctg3160□WAG-94L14  
ctg1337□ctg2609□□WAG-92F20  
ctg1337□ctg2609□ctg3410□WAG-18H24  
ctg1337□ctg2609□ctg3410□WAG-73A7  
ctg1337□ctg2609□ctg3410□WAG-93B3  
ctg1338□□□WAG-44D8  
ctg1338□ctg2612□□WAG-65B5  
ctg1338□ctg2612□ctg2972□WAG-52P10  
ctg1338□ctg2612□ctg2972□WAG-112P24  
ctg1338□ctg2612□ctg2972□WAG-120H5  
ctg1339□ctg2617□□WAG-52B16  
ctg1339□ctg2617□ctg3164□WAG-33B21  
ctg1339□ctg2617□ctg3164□WAG-38O21  
ctg1339□ctg2617□ctg3164□WAG-72O23  
ctg134□□□WAG-83J22  
ctg134□ctg3874□□WAG-8J15  
ctg134□ctg3874□□WAG-109P17  
ctg134□ctg3874□ctg5041□WAG-41F11  
ctg134□ctg3874□ctg5041□WAG-110K7  
ctg134□ctg483□□WAG-16B18  
ctg134□ctg483□ctg542□WAG-10E2  
ctg134□ctg483□ctg542□WAG-41P20  
ctg134□ctg483□ctg542□WAG-56N2  
ctg134□ctg483□ctg542□WAG-70M14  
ctg134□ctg483□ctg542□WAG-89J21  
ctg134□ctg483□ctg542□WAG-99F6  
ctg134□ctg483□ctg542□WAG-126O21  
ctg1340□□□WAG-2F17  
ctg1340□ctg3050□ctg3167□WAG-23J12  
ctg1340□ctg3050□ctg3167□WAG-58C3  
ctg1340□ctg3050□ctg3167□WAG-88K1  
ctg1340□ctg3050□ctg5156□WAG-91F14  
ctg1340□ctg3050□ctg5156□WAG-99G1  
ctg1340□ctg3050□ctg6279□WAG-52G18  
ctg1340□ctg3050□ctg6279□WAG-101G7  
ctg1340□ctg4668□ctg4828□WAG-16P11  
ctg1340□ctg4668□ctg4828□WAG-28A14  
ctg1341□□□WAG-124A6  
ctg1341□ctg4322□□WAG-15M10  
ctg1341□ctg4322□□WAG-22P19  
ctg1341□ctg4322□□WAG-78J9  
ctg1341□ctg4322□□WAG-123A24  
ctg1341□ctg5363□ctg6304□WAG-107N22  
ctg1341□ctg5363□ctg6304□WAG-113H13  
ctg1342□ctg2615□□WAG-72F19  
ctg1342□ctg2615□ctg3419□WAG-41J6  
ctg1342□ctg2615□ctg3419□WAG-88P6  
ctg1342□ctg2615□ctg3419□WAG-103F13  
ctg1343□□□WAG-128O13

ctg1343□ctg3071□□WAG-116N11  
ctg1343□ctg3071□ctg4184□WAG-26B2  
ctg1343□ctg3071□ctg4184□WAG-89C9  
ctg1343□ctg3071□ctg4184□WAG-101H11  
ctg1343□ctg4306□□WAG-122C24  
ctg1343□ctg4306□ctg6786□WAG-37C6  
ctg1343□ctg4306□ctg6786□WAG-111L10  
ctg1344□ctg3075□□WAG-O15  
ctg1344□ctg3075□□WAG-36L21  
ctg1344□ctg3075□□WAG-73O22  
ctg1344□ctg3075□ctg5138□WAG-18J16  
ctg1344□ctg3075□ctg5138□WAG-47N12  
ctg1345□ctg2625□□WAG-92I16  
ctg1345□ctg2625□□WAG-105H5  
ctg1345□ctg2625□ctg5649□WAG-5B11  
ctg1345□ctg2625□ctg5649□WAG-38H17  
ctg1345□ctg2625□ctg6011□WAG-26F9  
ctg1345□ctg2625□ctg6011□WAG-93N2  
ctg1346□ctg2626□□WAG-9N7  
ctg1346□ctg2626□□WAG-77D22  
ctg1346□ctg2626□□WAG-123L6  
ctg1346□ctg2626□ctg5928□WAG-I6  
ctg1346□ctg2626□ctg5928□WAG-47M6  
ctg1347□□□WAG-59K18  
ctg1347□ctg3077□ctg3078□WAG-46N9  
ctg1347□ctg3077□ctg3078□WAG-52H2  
ctg1347□ctg3077□ctg3078□WAG-61P6  
ctg1347□ctg3077□ctg3078□WAG-71J1  
ctg1348□□□WAG-32C22  
ctg1348□ctg3080□□WAG-11C24  
ctg1348□ctg3080□□WAG-93B19  
ctg1348□ctg3080□ctg4045□WAG-49H3  
ctg1348□ctg3080□ctg4045□WAG-56D10  
ctg1348□ctg3080□ctg4045□WAG-80D24  
ctg1348□ctg3485□□WAG-51G12  
ctg1348□ctg3485□□WAG-72H4  
ctg1348□ctg3485□ctg4721□WAG-29F15  
ctg1348□ctg3485□ctg4721□WAG-48P1  
ctg1349□ctg2629□ctg2590□WAG-6D23  
ctg1349□ctg2629□ctg2590□WAG-50K9  
ctg1349□ctg2629□ctg2590□WAG-89I12  
ctg1349□ctg2629□ctg2590□WAG-110N2  
ctg1349□ctg2629□ctg2590□WAG-116D18  
ctg135□ctg573□□WAG-16F24  
ctg135□ctg573□□WAG-79H3  
ctg135□ctg573□ctg658□WAG-5K11  
ctg135□ctg573□ctg658□WAG-26H21  
ctg135□ctg573□ctg658□WAG-37L12  
ctg135□ctg573□ctg658□WAG-57C2  
ctg135□ctg573□ctg658□WAG-58E14  
ctg135□ctg573□ctg658□WAG-64I20  
ctg135□ctg573□ctg658□WAG-76K13  
ctg135□ctg573□ctg658□WAG-79I21  
ctg135□ctg573□ctg658□WAG-82D17  
ctg135□ctg573□ctg658□WAG-104H14  
ctg135□ctg573□ctg658□WAG-113C16

ctg1350□□□WAG-89O5  
ctg1350□ctg2631□ctg3321□WAG-37K20  
ctg1350□ctg2631□ctg3321□WAG-42J5  
ctg1350□ctg2631□ctg3321□WAG-54H11  
ctg1350□ctg2631□ctg3321□WAG-70O22  
ctg1350□ctg2631□ctg3321□WAG-122B2  
ctg1350□ctg2631□ctg4457□WAG-5B19  
ctg1350□ctg2631□ctg4457□WAG-59F20  
ctg1351□□□WAG-81F17  
ctg1351□□□WAG-90E21  
ctg1351□ctg3164□□WAG-59N1  
ctg1351□ctg3164□ctg4182□WAG-5P15  
ctg1351□ctg3164□ctg4182□WAG-43O22  
ctg1351□ctg3164□ctg4182□WAG-78A16  
ctg1352□ctg2636□ctg2596□WAG-14E2  
ctg1352□ctg2636□ctg2596□WAG-55F14  
ctg1352□ctg2636□ctg2596□WAG-81O17  
ctg1353□□□WAG-60F21  
ctg1353□ctg3460□□WAG-83O7  
ctg1353□ctg3460□ctg3581□WAG-20F19  
ctg1353□ctg3460□ctg3581□WAG-70O21  
ctg1353□ctg3460□ctg3581□WAG-114J2  
ctg1354□ctg3051□ctg3047□WAG-94I6  
ctg1354□ctg3051□ctg3047□WAG-107I4  
ctg1354□ctg3051□ctg3047□WAG-111E1  
ctg1354□ctg3344□□WAG-36C14  
ctg1354□ctg3344□□WAG-96G19  
ctg1354□ctg3344□ctg5574□WAG-11E24  
ctg1354□ctg3344□ctg5574□WAG-92L19  
ctg1354□ctg3344□ctg6441□WAG-82E21  
ctg1354□ctg3344□ctg6441□WAG-123N14  
ctg1355□ctg3171□□WAG-48B15  
ctg1355□ctg3171□□WAG-125H7  
ctg1355□ctg3171□ctg4354□WAG-11L6  
ctg1355□ctg3171□ctg4354□WAG-102E3  
ctg1355□ctg3171□ctg4354□WAG-125A14  
ctg1356□ctg2638□□WAG-48C7  
ctg1356□ctg2638□□WAG-59H6  
ctg1356□ctg2638□□WAG-103C8  
ctg1356□ctg2638□ctg4431□WAG-88K15  
ctg1356□ctg2638□ctg4431□WAG-112A6  
ctg1357□□□WAG-114H4  
ctg1357□ctg2640□ctg2599□WAG-67M5  
ctg1357□ctg2640□ctg2599□WAG-94D19  
ctg1357□ctg2640□ctg2599□WAG-126M21  
ctg1358□□□WAG-29G22  
ctg1358□ctg3174□□WAG-39K3  
ctg1358□ctg3174□□WAG-60P6  
ctg1358□ctg3174□□WAG-77M23  
ctg1358□ctg3174□ctg5273□WAG-118E21  
ctg1358□ctg3174□ctg5273□WAG-128F8  
ctg1359□ctg2642□ctg2602□WAG-10J18  
ctg1359□ctg2642□ctg2602□WAG-19G6  
ctg1359□ctg2642□ctg2602□WAG-48K11  
ctg1359□ctg2642□ctg2602□WAG-69H7  
ctg136□□□WAG-6G18

ctg136□□□WAG-64J15  
ctg136□□□WAG-95D1  
ctg136□□□WAG-112D12  
ctg136□ctg2596□ctg3383□WAG-9P2  
ctg136□ctg2596□ctg3383□WAG-19L17  
ctg136□ctg2596□ctg3383□WAG-93M7  
ctg136□ctg2596□ctg3383□WAG-125A22  
ctg136□ctg3794□ctg4054□WAG-75I2  
ctg136□ctg3794□ctg4054□WAG-100B24  
ctg1360□□□WAG-54J12  
ctg1360□ctg4217□□WAG-106H18  
ctg1360□ctg4217□ctg6081□WAG-55C23  
ctg1360□ctg4217□ctg6081□WAG-61L15  
ctg1360□ctg6020□□WAG-69O12  
ctg1360□ctg6020□□WAG-121K8  
ctg1360□ctg6218□□WAG-21P11  
ctg1360□ctg6218□□WAG-25F19  
ctg1361□ctg3052□□WAG-62N5  
ctg1361□ctg3052□ctg3048□WAG-6B4  
ctg1361□ctg3052□ctg3048□WAG-61C19  
ctg1361□ctg3052□ctg3048□WAG-75A11  
ctg1361□ctg3052□ctg3048□WAG-130N13  
ctg1362□□□WAG-3F11  
ctg1362□□□WAG-46C5  
ctg1362□□□WAG-59D11  
ctg1362□□□WAG-100M16  
ctg1362□□□WAG-117J8  
ctg1362□□□WAG-118N19  
ctg1362□ctg3805□ctg4064□WAG-44C8  
ctg1362□ctg3805□ctg4064□WAG-100F19  
ctg1362□ctg3805□ctg4064□WAG-123L23  
ctg1362□ctg5124□ctg5747□WAG-92F21  
ctg1362□ctg5124□ctg5747□WAG-98C23  
ctg1363□ctg3068□□WAG-40D21  
ctg1363□ctg3068□□WAG-109H8  
ctg1363□ctg3068□ctg4024□WAG-10J24  
ctg1363□ctg3068□ctg4024□WAG-90H21  
ctg1363□ctg3068□ctg4024□WAG-104I6  
ctg1363□ctg6120□□WAG-55E19  
ctg1363□ctg6120□□WAG-127L6  
ctg1364□ctg2650□ctg2611□WAG-73N15  
ctg1364□ctg2650□ctg2611□WAG-78O18  
ctg1364□ctg2650□ctg2611□WAG-82B11  
ctg1365□ctg3181□ctg3200□WAG-42N4  
ctg1365□ctg3181□ctg3200□WAG-119G17  
ctg1365□ctg3714□ctg3928□WAG-88D21  
ctg1365□ctg3714□ctg3928□WAG-128L22  
ctg1366□□□WAG-34D11  
ctg1366□□□WAG-45C20  
ctg1366□ctg3715□□WAG-55D9  
ctg1366□ctg3715□ctg4855□WAG-29N18  
ctg1366□ctg3715□ctg4855□WAG-103J12  
ctg1366□ctg4314□ctg4507□WAG-4O1  
ctg1366□ctg4314□ctg4507□WAG-43O5  
ctg1367□□□WAG-18D7  
ctg1367□ctg4533□ctg4662□WAG-70E22

ctg1367□ctg4533□ctg4662□WAG-129L18  
ctg1367□ctg6510□□WAG-29H5  
ctg1367□ctg6510□□WAG-108G23  
ctg1368□ctg2655□ctg2623□WAG-45B1  
ctg1368□ctg2655□ctg2623□WAG-74P22  
ctg1368□ctg2655□ctg2623□WAG-97M12  
ctg1368□ctg2655□ctg2623□WAG-116L6  
ctg1368□ctg3325□ctg3390□WAG-54D17  
ctg1368□ctg3325□ctg3390□WAG-91E13  
ctg1368□ctg3325□ctg3390□WAG-126O18  
ctg1369□ctg3198□□WAG-14A6  
ctg1369□ctg3198□ctg3226□WAG-17M24  
ctg1369□ctg3198□ctg3226□WAG-31J9  
ctg1369□ctg3198□ctg3226□WAG-73P6  
ctg137□□□WAG-12P14  
ctg137□ctg610□ctg641□WAG-11D21  
ctg137□ctg610□ctg641□WAG-13C19  
ctg137□ctg610□ctg641□WAG-19C11  
ctg137□ctg610□ctg641□WAG-56L10  
ctg137□ctg610□ctg641□WAG-60C3  
ctg137□ctg610□ctg641□WAG-63M8  
ctg137□ctg610□ctg641□WAG-77I20  
ctg137□ctg610□ctg641□WAG-78G3  
ctg1370□ctg2657□ctg2627□WAG-55P24  
ctg1370□ctg2657□ctg2627□WAG-72J6  
ctg1370□ctg2657□ctg2627□WAG-90M18  
ctg1370□ctg2657□ctg2627□WAG-92A12  
ctg1371□ctg2658□□WAG-21E16  
ctg1371□ctg2658□ctg3501□WAG-11H2  
ctg1371□ctg2658□ctg3501□WAG-50F18  
ctg1371□ctg2658□ctg3501□WAG-55C12  
ctg1372□□□WAG-80K17  
ctg1372□ctg3127□□WAG-19D13  
ctg1372□ctg3127□ctg4250□WAG-19D20  
ctg1372□ctg3127□ctg4250□WAG-74M13  
ctg1372□ctg3127□ctg5717□WAG-90L17  
ctg1372□ctg3127□ctg5717□WAG-114D8  
ctg1373□ctg2660□ctg2628□WAG-90J23  
ctg1373□ctg2660□ctg2628□WAG-105C16  
ctg1373□ctg2660□ctg2628□WAG-108A15  
ctg1374□□□WAG-16O3  
ctg1374□ctg3204□ctg4099□WAG-13H11  
ctg1374□ctg3204□ctg4099□WAG-86M10  
ctg1374□ctg3204□ctg4099□WAG-112P5  
ctg1374□ctg3204□ctg4099□WAG-120L2  
ctg1375□ctg3215□ctg3244□WAG-10J10  
ctg1375□ctg3215□ctg3244□WAG-11A18  
ctg1375□ctg5086□ctg5662□WAG-50H18  
ctg1375□ctg5086□ctg5662□WAG-56A15  
ctg1376□ctg3810□□WAG-14P19  
ctg1376□ctg3810□ctg5057□WAG-61N6  
ctg1376□ctg3810□ctg5057□WAG-96C10  
ctg1376□ctg4431□ctg4589□WAG-111E11  
ctg1376□ctg4431□ctg4589□WAG-120A17  
ctg1377□□□WAG-90N8  
ctg1377□ctg2669□□WAG-117K6

ctg1377□ctg2669□ctg2640□WAG-46M8  
ctg1377□ctg2669□ctg2640□WAG-97A5  
ctg1377□ctg2669□ctg2640□WAG-119D17  
ctg1378□ctg2670□ctg2642□WAG-11P5  
ctg1378□ctg2670□ctg2642□WAG-41P15  
ctg1378□ctg2670□ctg2642□WAG-130P14  
ctg1379□□□WAG-54N24  
ctg1379□ctg2959□□WAG-32G17  
ctg1379□ctg2959□ctg3271□WAG-25O1  
ctg1379□ctg2959□ctg3271□WAG-118J22  
ctg1379□ctg2959□ctg3271□WAG-122L22  
ctg138□□□WAG-64N12  
ctg138□ctg1984□□WAG-56O19  
ctg138□ctg1984□ctg2494□WAG-23B12  
ctg138□ctg1984□ctg2494□WAG-62K8  
ctg138□ctg1984□ctg2494□WAG-67N13  
ctg138□ctg489□□WAG-17L10  
ctg138□ctg489□□WAG-29B12  
ctg138□ctg489□□WAG-103L16  
ctg138□ctg489□ctg403□WAG-12I7  
ctg138□ctg489□ctg403□WAG-29H24  
ctg138□ctg489□ctg403□WAG-49G12  
ctg138□ctg489□ctg403□WAG-62K13  
ctg138□ctg489□ctg403□WAG-91A24  
ctg138□ctg489□ctg403□WAG-95L20  
ctg138□ctg489□ctg403□WAG-122E12  
ctg1380□□□WAG-45A15  
ctg1380□ctg3230□ctg3262□WAG-12F9  
ctg1380□ctg3230□ctg3262□WAG-72A5  
ctg1380□ctg3230□ctg3262□WAG-98L3  
ctg1381□ctg3240□ctg3279□WAG-37H4  
ctg1381□ctg3240□ctg3279□WAG-50B10  
ctg1381□ctg3240□ctg3279□WAG-95N2  
ctg1381□ctg4340□ctg4526□WAG-50K4  
ctg1381□ctg4340□ctg4526□WAG-53H18  
ctg1381□ctg5004□ctg5465□WAG-45P22  
ctg1381□ctg5004□ctg5465□WAG-91E4  
ctg1382□ctg2684□ctg2656□WAG-83J5  
ctg1382□ctg2684□ctg2656□WAG-84M12  
ctg1382□ctg2684□ctg2656□WAG-130J20  
ctg1383□□□WAG-8L3  
ctg1383□□□WAG-46P19  
ctg1383□□□WAG-99E8  
ctg1383□ctg3458□□WAG-16B4  
ctg1383□ctg3458□□WAG-130J21  
ctg1383□ctg3458□ctg4644□WAG-85M24  
ctg1383□ctg3458□ctg4644□WAG-113M13  
ctg1384□ctg3759□□WAG-16K3  
ctg1384□ctg3759□□WAG-24N18  
ctg1384□ctg3759□□WAG-34J23  
ctg1384□ctg3759□□WAG-73M22  
ctg1384□ctg3759□□WAG-117O4  
ctg1384□ctg3893□ctg4171□WAG-8C5  
ctg1384□ctg3893□ctg4171□WAG-12D14  
ctg1384□ctg3893□ctg4171□WAG-39O14  
ctg1385□□□WAG-15D16



ctg1385□ctg3074□□WAG-105N19  
ctg1385□ctg3074□ctg3916□WAG-43L8  
ctg1385□ctg3074□ctg3916□WAG-61C5  
ctg1385□ctg3074□ctg3916□WAG-90H7  
ctg1386□□□WAG-10P1  
ctg1386□□□WAG-12J10  
ctg1386□□□WAG-125F23  
ctg1386□ctg3921□□WAG-67L19  
ctg1386□ctg3921□ctg4197□WAG-9A14  
ctg1386□ctg3921□ctg4197□WAG-107F16  
ctg1386□ctg3921□ctg4197□WAG-117K12  
ctg1387□□□WAG-24A10  
ctg1387□□□WAG-64K8  
ctg1387□□□WAG-78M21  
ctg1387□□□WAG-86B16  
ctg1387□□□WAG-117B8  
ctg1387□ctg4633□□WAG-46A19  
ctg1387□ctg4633□□WAG-105H3  
ctg1387□ctg4633□□WAG-121E21  
ctg1388□□□WAG-70B4  
ctg1388□ctg4268□□WAG-90E24  
ctg1388□ctg4268□ctg6202□WAG-105N4  
ctg1388□ctg4268□ctg6202□WAG-112A11  
ctg1388□ctg4647□ctg4800□WAG-16E15  
ctg1388□ctg4647□ctg4800□WAG-109G5  
ctg1389□□□WAG-108E16  
ctg1389□ctg3683□□WAG-33D20  
ctg1389□ctg3683□□WAG-116H3  
ctg1389□ctg3683□ctg5080□WAG-17K3  
ctg1389□ctg3683□ctg5080□WAG-113I7  
ctg139□□□WAG-71M15  
ctg139□□□WAG-90O23  
ctg139□ctg507□□WAG-21K18  
ctg139□ctg507□□WAG-36E14  
ctg139□ctg507□ctg541□WAG-18A11  
ctg139□ctg507□ctg541□WAG-26D12  
ctg139□ctg507□ctg541□WAG-29C10  
ctg139□ctg507□ctg541□WAG-29G5  
ctg139□ctg507□ctg541□WAG-30J13  
ctg139□ctg507□ctg541□WAG-50C21  
ctg139□ctg507□ctg541□WAG-67E24  
ctg139□ctg507□ctg541□WAG-75K19  
ctg139□ctg507□ctg541□WAG-83B1  
ctg139□ctg507□ctg541□WAG-98L5  
ctg139□ctg507□ctg541□WAG-105L13  
ctg139□ctg507□ctg541□WAG-124D19  
ctg1390□ctg2861□ctg2849□WAG-54N2  
ctg1390□ctg2861□ctg2849□WAG-58I4  
ctg1390□ctg2861□ctg2849□WAG-87M5  
ctg1390□ctg4962□ctg5370□WAG-20B11  
ctg1390□ctg4962□ctg5370□WAG-22H12  
ctg1391□ctg3169□□WAG-21B3  
ctg1391□ctg3169□ctg3191□WAG-24J11  
ctg1391□ctg3169□ctg3191□WAG-93N1  
ctg1391□ctg3169□ctg3191□WAG-106F24  
ctg1392□□□WAG-123J4

ctg1392□ctg3172□□WAG-25H8  
ctg1392□ctg3172□□WAG-51C24  
ctg1392□ctg3172□□WAG-127D15  
ctg1392□ctg3172□ctg3192□WAG-8I8  
ctg1392□ctg3172□ctg3192□WAG-88P16  
ctg1392□ctg3172□ctg3192□WAG-103J1  
ctg1392□ctg3172□ctg3192□WAG-124K8  
ctg1393□□□WAG-28D9  
ctg1393□ctg2702□ctg3568□WAG-4C5  
ctg1393□ctg2702□ctg3568□WAG-4I2  
ctg1393□ctg2702□ctg3568□WAG-14B19  
ctg1393□ctg2702□ctg3568□WAG-24L10  
ctg1393□ctg2702□ctg3568□WAG-65B23  
ctg1394□□□WAG-N17  
ctg1394□□□WAG-37M4  
ctg1394□□□WAG-78E15  
ctg1394□ctg2703□□WAG-60H17  
ctg1394□ctg2703□□WAG-82B8  
ctg1394□ctg2703□ctg3432□WAG-38H18  
ctg1394□ctg2703□ctg3432□WAG-44O11  
ctg1394□ctg4676□□WAG-45L16  
ctg1394□ctg4676□□WAG-50A13  
ctg1394□ctg4676□□WAG-66D11  
ctg1395□ctg2708□□WAG-89E6  
ctg1395□ctg2708□ctg2694□WAG-47B23  
ctg1395□ctg2708□ctg2694□WAG-51O1  
ctg1395□ctg2708□ctg2694□WAG-69L14  
ctg1395□ctg2708□ctg2694□WAG-97H13  
ctg1396□□□WAG-29H12  
ctg1396□ctg2709□ctg2695□WAG-6F22  
ctg1396□ctg2709□ctg2695□WAG-34P15  
ctg1396□ctg2709□ctg2695□WAG-40I22  
ctg1396□ctg2709□ctg2695□WAG-96B20  
ctg1397□ctg3272□□WAG-68L23  
ctg1397□ctg3272□ctg4436□WAG-75H6  
ctg1397□ctg3272□ctg4436□WAG-122C7  
ctg1397□ctg5745□□WAG-18A14  
ctg1397□ctg5745□□WAG-59M3  
ctg1398□□□WAG-P13  
ctg1398□□□WAG-45O19  
ctg1398□□□WAG-119A23  
ctg1398□ctg3433□ctg3545□WAG-45N16  
ctg1398□ctg3433□ctg3545□WAG-109C4  
ctg1398□ctg3433□ctg3545□WAG-111B16  
ctg1399□ctg3187□□WAG-15G10  
ctg1399□ctg3187□□WAG-69N13  
ctg1399□ctg3187□ctg4361□WAG-34E3  
ctg1399□ctg3187□ctg4361□WAG-96B9  
ctg14□□□WAG-43I1  
ctg14□□□WAG-48F21  
ctg14□□□WAG-55G7  
ctg14□□□WAG-66N8  
ctg14□ctg2259□□WAG-2A13  
ctg14□ctg2259□□WAG-12E2  
ctg14□ctg2259□□WAG-58B23  
ctg14□ctg2259□ctg2937□WAG-43H20

ctg14□ctg2259□ctg2937□WAG-47H15  
ctg14□ctg2259□ctg2937□WAG-80M22  
ctg14□ctg2259□ctg3114□WAG-23C15  
ctg14□ctg2259□ctg3114□WAG-71L8  
ctg14□ctg2259□ctg3114□WAG-103L10  
ctg14□ctg2259□ctg5407□WAG-56N20  
ctg14□ctg2259□ctg5407□WAG-59M6  
ctg14□ctg3958□ctg4234□WAG-71G18  
ctg14□ctg3958□ctg4234□WAG-72J10  
ctg14□ctg4047□□WAG-87J10  
ctg14□ctg4047□ctg6024□WAG-4C13  
ctg14□ctg4047□ctg6024□WAG-62A2  
ctg14□ctg64□ctg124□WAG-11B15  
ctg14□ctg64□ctg124□WAG-19D7  
ctg14□ctg64□ctg124□WAG-37N14  
ctg14□ctg64□ctg124□WAG-47L21  
ctg14□ctg64□ctg124□WAG-64H21  
ctg14□ctg64□ctg124□WAG-68J13  
ctg14□ctg64□ctg124□WAG-87C12  
ctg14□ctg64□ctg124□WAG-112I11  
ctg14□ctg64□ctg124□WAG-118O14  
ctg14□ctg64□ctg124□WAG-119O24  
ctg14□ctg64□ctg124□WAG-126J19  
ctg14□ctg64□ctg124□WAG-129N5  
ctg14□ctg64□ctg4780□WAG-2H1  
ctg14□ctg64□ctg4780□WAG-26D2  
ctg140□ctg597□ctg650□WAG-13L12  
ctg140□ctg597□ctg650□WAG-28L2  
ctg140□ctg597□ctg650□WAG-28P7  
ctg140□ctg597□ctg650□WAG-36A15  
ctg140□ctg597□ctg650□WAG-36K14  
ctg140□ctg597□ctg650□WAG-48F1  
ctg140□ctg597□ctg650□WAG-62D8  
ctg140□ctg597□ctg650□WAG-63N17  
ctg140□ctg597□ctg650□WAG-69M2  
ctg140□ctg597□ctg650□WAG-71J2  
ctg140□ctg597□ctg650□WAG-75F23  
ctg140□ctg597□ctg650□WAG-81I24  
ctg140□ctg597□ctg650□WAG-83M17  
ctg140□ctg597□ctg650□WAG-86K14  
ctg140□ctg597□ctg650□WAG-111P18  
ctg140□ctg597□ctg650□WAG-113F6  
ctg1400□□□WAG-28B6  
ctg1400□ctg3274□□WAG-97F16  
ctg1400□ctg3274□ctg4148□WAG-80K22  
ctg1400□ctg3274□ctg4148□WAG-90A4  
ctg1400□ctg3274□ctg4148□WAG-92N18  
ctg1400□ctg5144□ctg5794□WAG-17C6  
ctg1400□ctg5144□ctg5794□WAG-83K5  
ctg1401□ctg2712□ctg2696□WAG-17K2  
ctg1401□ctg2712□ctg2696□WAG-60A19  
ctg1401□ctg2712□ctg2696□WAG-82B15  
ctg1402□□□WAG-92E24  
ctg1402□ctg2716□□WAG-60J23  
ctg1402□ctg2716□ctg3611□WAG-37N6  
ctg1402□ctg2716□ctg3611□WAG-42L15

ctg1402□ctg2716□ctg3611□WAG-59J9  
ctg1403□ctg2797□□WAG-33C5  
ctg1403□ctg2797□ctg2792□WAG-22P16  
ctg1403□ctg2797□ctg2792□WAG-68L17  
ctg1403□ctg2797□ctg2792□WAG-113F24  
ctg1403□ctg2797□ctg2792□WAG-119M9  
ctg1404□ctg2717□□WAG-18P12  
ctg1404□ctg2717□□WAG-21H23  
ctg1404□ctg2717□□WAG-40I20  
ctg1404□ctg2717□□WAG-87M11  
ctg1404□ctg2717□ctg4741□WAG-86F13  
ctg1404□ctg2717□ctg4741□WAG-103C10  
ctg1405□□□WAG-51G2  
ctg1405□ctg3286□□WAG-34B13  
ctg1405□ctg3286□□WAG-48M19  
ctg1405□ctg3286□□WAG-58C2  
ctg1405□ctg3286□ctg5729□WAG-56E3  
ctg1405□ctg3286□ctg5729□WAG-56M23  
ctg1406□□□WAG-9L10  
ctg1406□□□WAG-58N1  
ctg1406□□□WAG-91I20  
ctg1406□ctg3819□ctg4074□WAG-26H3  
ctg1406□ctg3819□ctg4074□WAG-44K4  
ctg1406□ctg3819□ctg4074□WAG-124B7  
ctg1406□ctg3819□ctg4074□WAG-130L8  
ctg1407□□□WAG-12J24  
ctg1407□ctg3196□ctg3219□WAG-95L19  
ctg1407□ctg3196□ctg3219□WAG-118M17  
ctg1407□ctg3196□ctg3219□WAG-119P5  
ctg1408□ctg2718□□WAG-124F17  
ctg1408□ctg2718□ctg3460□WAG-1B1  
ctg1408□ctg2718□ctg3460□WAG-73H7  
ctg1408□ctg2718□ctg3460□WAG-86E7  
ctg1409□□□WAG-2E4  
ctg1409□□□WAG-10N17  
ctg1409□□□WAG-21C5  
ctg1409□□□WAG-22B24  
ctg1409□□□WAG-61F23  
ctg1409□□□WAG-121H23  
ctg1409□ctg2720□□WAG-42L20  
ctg1409□ctg2720□ctg3468□WAG-75G10  
ctg1409□ctg2720□ctg3468□WAG-89O4  
ctg1409□ctg2720□ctg3468□WAG-109M20  
ctg1409□ctg4307□□WAG-19F22  
ctg1409□ctg4307□□WAG-73P14  
ctg1409□ctg4307□□WAG-75J24  
ctg1409□ctg4307□□WAG-103E9  
ctg141□ctg478□□WAG-2L19  
ctg141□ctg478□□WAG-10P13  
ctg141□ctg478□□WAG-29I6  
ctg141□ctg478□□WAG-32I21  
ctg141□ctg478□□WAG-91O23  
ctg141□ctg478□ctg1487□WAG-2D5  
ctg141□ctg478□ctg1487□WAG-12P5  
ctg141□ctg478□ctg1487□WAG-31C16  
ctg141□ctg478□ctg1487□WAG-45F12

ctg141□ctg478□ctg1487□WAG-47B10  
ctg141□ctg478□ctg1487□WAG-48K1  
ctg141□ctg478□ctg1487□WAG-49M6  
ctg141□ctg478□ctg1487□WAG-50J1  
ctg141□ctg478□ctg1487□WAG-90G18  
ctg141□ctg478□ctg1487□WAG-105I21  
ctg141□ctg478□ctg1487□WAG-119H3  
ctg141□ctg478□ctg831□WAG-18G22  
ctg141□ctg478□ctg831□WAG-26B17  
ctg141□ctg478□ctg831□WAG-47L1  
ctg141□ctg478□ctg831□WAG-48D7  
ctg141□ctg478□ctg831□WAG-55G6  
ctg141□ctg478□ctg831□WAG-61P23  
ctg141□ctg478□ctg831□WAG-72D5  
ctg141□ctg478□ctg831□WAG-75B13  
ctg141□ctg478□ctg831□WAG-86A9  
ctg141□ctg478□ctg831□WAG-96G20  
ctg141□ctg478□ctg831□WAG-98K8  
ctg141□ctg478□ctg831□WAG-99I17  
ctg141□ctg478□ctg831□WAG-124O3  
ctg141□ctg478□ctg831□WAG-127D17  
ctg141□ctg5787□□WAG-121D8  
ctg141□ctg5787□□WAG-125N14  
ctg1410□□□WAG-14P3  
ctg1410□ctg3294□ctg3344□WAG-48C24  
ctg1410□ctg3294□ctg3344□WAG-70O7  
ctg1410□ctg3294□ctg3344□WAG-105O2  
ctg1411□ctg2724□□WAG-18I20  
ctg1411□ctg2724□ctg3471□WAG-117C11  
ctg1411□ctg2724□ctg3471□WAG-119G5  
ctg1412□ctg2726□□WAG-34I24  
ctg1412□ctg2726□ctg2710□WAG-58E7  
ctg1412□ctg2726□ctg2710□WAG-90F10  
ctg1412□ctg2726□ctg2710□WAG-91C19  
ctg1413□ctg2729□ctg2711□WAG-44P4  
ctg1413□ctg2729□ctg2711□WAG-69N17  
ctg1414□□□WAG-86C12  
ctg1414□ctg3205□ctg3229□WAG-38P5  
ctg1414□ctg3205□ctg3229□WAG-71B20  
ctg1414□ctg3205□ctg3229□WAG-130M16  
ctg1415□□□WAG-47A10  
ctg1415□□□WAG-108H1  
ctg1415□ctg2732□□WAG-115M18  
ctg1415□ctg2732□ctg3634□WAG-21K16  
ctg1415□ctg2732□ctg3634□WAG-22J3  
ctg1415□ctg2732□ctg3634□WAG-70H17  
ctg1416□□□WAG-82N3  
ctg1416□□□WAG-99P5  
ctg1416□ctg3918□□WAG-65N1  
ctg1416□ctg3918□ctg5308□WAG-45K23  
ctg1416□ctg3918□ctg5308□WAG-119G11  
ctg1417□□□WAG-2O5  
ctg1417□□□WAG-73O6  
ctg1417□ctg3210□□WAG-71N3  
ctg1417□ctg3210□ctg3237□WAG-24H24  
ctg1417□ctg3210□ctg3237□WAG-48F22

ctg1417□ctg3210□ctg3237□WAG-59P19  
ctg1417□ctg3210□ctg3237□WAG-113O13  
ctg1418□ctg3011□□WAG-128C22  
ctg1418□ctg3011□ctg4109□WAG-112J14  
ctg1418□ctg3011□ctg4109□WAG-112K14  
ctg1418□ctg5044□ctg5559□WAG-17I23  
ctg1418□ctg5044□ctg5559□WAG-45P17  
ctg1419□ctg2826□□WAG-56H19  
ctg1419□ctg2826□□WAG-91B5  
ctg1419□ctg2826□ctg3644□WAG-90P3  
ctg1419□ctg2826□ctg3644□WAG-103C1  
ctg1419□ctg2826□ctg3644□WAG-112I4  
ctg142□ctg428□□WAG-111G21  
ctg142□ctg428□□WAG-114D23  
ctg142□ctg428□ctg456□WAG-58J24  
ctg142□ctg428□ctg456□WAG-67F10  
ctg142□ctg428□ctg456□WAG-117A10  
ctg142□ctg428□ctg456□WAG-120N17  
ctg142□ctg428□ctg456□WAG-125H22  
ctg142□ctg5929□□WAG-5B7  
ctg142□ctg5929□□WAG-22I18  
ctg1420□ctg2738□ctg2719□WAG-14I6  
ctg1420□ctg2738□ctg2719□WAG-20A16  
ctg1420□ctg2738□ctg2719□WAG-24G6  
ctg1420□ctg2738□ctg2719□WAG-30E2  
ctg1421□□□WAG-75P15  
ctg1421□□□WAG-120F24  
ctg1421□□□WAG-130I10  
ctg1421□ctg4567□ctg4716□WAG-68E24  
ctg1421□ctg4567□ctg4716□WAG-100B16  
ctg1422□ctg2743□ctg2721□WAG-72L2  
ctg1422□ctg2743□ctg2721□WAG-74B2  
ctg1422□ctg2743□ctg2721□WAG-120C22  
ctg1423□ctg2745□ctg2723□WAG-27P16  
ctg1423□ctg2745□ctg2723□WAG-81F15  
ctg1423□ctg2745□ctg2723□WAG-127J18  
ctg1424□ctg2747□ctg2729□WAG-57A7  
ctg1424□ctg2747□ctg2729□WAG-94F4  
ctg1424□ctg2747□ctg2729□WAG-96D8  
ctg1425□□□WAG-85O7  
ctg1425□ctg3314□ctg3376□WAG-61O6  
ctg1425□ctg3314□ctg3376□WAG-97J10  
ctg1426□ctg2751□ctg2731□WAG-55A18  
ctg1426□ctg2751□ctg2731□WAG-115C17  
ctg1427□□□WAG-64F5  
ctg1427□ctg3232□ctg3263□WAG-36P4  
ctg1427□ctg3232□ctg3263□WAG-64E5  
ctg1427□ctg3232□ctg3263□WAG-103D21  
ctg1428□□□WAG-37I12  
ctg1428□ctg3243□□WAG-73O12  
ctg1428□ctg3243□□WAG-89H24  
ctg1428□ctg3243□ctg3377□WAG-70N1  
ctg1428□ctg3243□ctg3377□WAG-95F21  
ctg1428□ctg3243□ctg3377□WAG-109O5  
ctg1429□□□WAG-12L1  
ctg1429□ctg3237□ctg3274□WAG-25O13

ctg1429□ctg3237□ctg3274□WAG-104I15  
ctg1429□ctg3237□ctg3274□WAG-106G15  
ctg143□ctg3686□□WAG-3P15  
ctg143□ctg3686□□WAG-65H8  
ctg143□ctg3686□□WAG-75A13  
ctg143□ctg3686□ctg4758□WAG-39B17  
ctg143□ctg3686□ctg4758□WAG-66J5  
ctg143□ctg5328□ctg6220□WAG-29D14  
ctg143□ctg5328□ctg6220□WAG-63P21  
ctg143□ctg595□□WAG-35H23  
ctg143□ctg595□ctg5112□WAG-93L7  
ctg143□ctg595□ctg5112□WAG-102H1  
ctg143□ctg595□ctg6284□WAG-41A13  
ctg143□ctg595□ctg6284□WAG-44N17  
ctg143□ctg595□ctg793□WAG-41P8  
ctg143□ctg595□ctg793□WAG-47G19  
ctg143□ctg595□ctg793□WAG-54I17  
ctg143□ctg595□ctg793□WAG-101L22  
ctg143□ctg595□ctg793□WAG-117G8  
ctg1430□□□WAG-37M18  
ctg1430□ctg3041□ctg3037□WAG-59J19  
ctg1430□ctg3041□ctg3037□WAG-93F13  
ctg1430□ctg3041□ctg3037□WAG-102M16  
ctg1430□ctg3041□ctg3037□WAG-122I4  
ctg1431□ctg2754□□WAG-85I10  
ctg1431□ctg2754□ctg3896□WAG-68D12  
ctg1431□ctg2754□ctg3896□WAG-85O14  
ctg1431□ctg2754□ctg3896□WAG-93K14  
ctg1431□ctg2754□ctg3896□WAG-129H20  
ctg1432□ctg3994□□WAG-14I15  
ctg1432□ctg3994□□WAG-82F18  
ctg1432□ctg3994□ctg5225□WAG-43N1  
ctg1432□ctg3994□ctg5225□WAG-44G18  
ctg1432□ctg5299□ctg6142□WAG-10O21  
ctg1432□ctg5299□ctg6142□WAG-43P23  
ctg1433□ctg2757□ctg2739□WAG-7K13  
ctg1433□ctg2757□ctg2739□WAG-26A5  
ctg1433□ctg2757□ctg2739□WAG-29A21  
ctg1433□ctg2757□ctg2739□WAG-59L21  
ctg1434□□□WAG-89K4  
ctg1434□ctg2760□□WAG-62E16  
ctg1434□ctg2760□ctg3535□WAG-35B9  
ctg1434□ctg2760□ctg3535□WAG-67P19  
ctg1435□□□WAG-8H3  
ctg1435□ctg3324□□WAG-79G4  
ctg1435□ctg3324□ctg4391□WAG-18P19  
ctg1435□ctg3324□ctg4391□WAG-127L8  
ctg1436□□□WAG-63C8  
ctg1436□ctg3333□□WAG-84A10  
ctg1436□ctg3333□ctg3947□WAG-17G11  
ctg1436□ctg3333□ctg3947□WAG-87J5  
ctg1436□ctg3333□ctg3947□WAG-106A2  
ctg1436□ctg3333□ctg5728□WAG-56H24  
ctg1436□ctg3333□ctg5728□WAG-116L23  
ctg1437□ctg3031□□WAG-4M21  
ctg1437□ctg3031□ctg3287□WAG-53D24

ctg1437□ctg3031□ctg3287□WAG-84K1  
ctg1437□ctg3031□ctg3287□WAG-92D12  
ctg1438□ctg3336□□WAG-110F11  
ctg1438□ctg3336□ctg4515□WAG-37M9  
ctg1438□ctg3336□ctg4515□WAG-123A14  
ctg1438□ctg6201□□WAG-18I12  
ctg1438□ctg6201□□WAG-44B6  
ctg1439□□□WAG-50N7  
ctg1439□□□WAG-95O4  
ctg1439□ctg2768□ctg2746□WAG-68E22  
ctg1439□ctg2768□ctg2746□WAG-72M6  
ctg1439□ctg2768□ctg2746□WAG-112G18  
ctg144□□□WAG-29K17  
ctg144□□□WAG-32F9  
ctg144□□□WAG-66J11  
ctg144□ctg2436□ctg2347□WAG-52O13  
ctg144□ctg2436□ctg2347□WAG-95N19  
ctg144□ctg2436□ctg2347□WAG-106A20  
ctg144□ctg2436□ctg2347□WAG-118N12  
ctg144□ctg2538□□WAG-86G12  
ctg144□ctg2538□□WAG-96H18  
ctg144□ctg2538□ctg4304□WAG-32E10  
ctg144□ctg2538□ctg4304□WAG-65B22  
ctg144□ctg2538□ctg4304□WAG-80K20  
ctg144□ctg435□□WAG-121A4  
ctg144□ctg435□ctg558□WAG-3D16  
ctg144□ctg435□ctg558□WAG-10K15  
ctg144□ctg435□ctg558□WAG-17L13  
ctg144□ctg435□ctg558□WAG-37O5  
ctg144□ctg435□ctg558□WAG-61L24  
ctg144□ctg435□ctg558□WAG-70K19  
ctg144□ctg435□ctg558□WAG-76C22  
ctg144□ctg435□ctg558□WAG-82B7  
ctg144□ctg435□ctg558□WAG-94N13  
ctg144□ctg435□ctg558□WAG-99N6  
ctg144□ctg435□ctg558□WAG-107M12  
ctg144□ctg435□ctg558□WAG-122H18  
ctg144□ctg435□ctg5863□WAG-46J18  
ctg144□ctg435□ctg5863□WAG-72E22  
ctg1440□□□WAG-23C23  
ctg1440□ctg3884□□WAG-17P1  
ctg1440□ctg3884□ctg4153□WAG-39M17  
ctg1440□ctg3884□ctg4153□WAG-44F16  
ctg1440□ctg3884□ctg4153□WAG-107E18  
ctg1441□□□WAG-39P8  
ctg1441□ctg3888□□WAG-15F19  
ctg1441□ctg3888□ctg4161□WAG-91A15  
ctg1441□ctg3888□ctg4161□WAG-99I4  
ctg1441□ctg3888□ctg4161□WAG-106J6  
ctg1441□ctg5968□□WAG-41M6  
ctg1441□ctg5968□□WAG-98A6  
ctg1442□ctg2771□ctg2749□WAG-45L13  
ctg1442□ctg2771□ctg2749□WAG-63D13  
ctg1442□ctg2771□ctg2749□WAG-105I15  
ctg1443□□□WAG-22O16  
ctg1443□ctg3006□ctg2995□WAG-40H10



ctg1443□ctg3006□ctg2995□WAG-47C15  
ctg1443□ctg3006□ctg2995□WAG-119A14  
ctg1444□□□WAG-15E12  
ctg1444□ctg3343□ctg4402□WAG-49G3  
ctg1444□ctg3343□ctg4402□WAG-55H13  
ctg1444□ctg3343□ctg5779□WAG-82J2  
ctg1444□ctg3343□ctg5779□WAG-124K13  
ctg1444□ctg5807□□WAG-72P12  
ctg1444□ctg5807□□WAG-77K21  
ctg1445□□□WAG-64K18  
ctg1445□ctg3345□ctg4227□WAG-1B17  
ctg1445□ctg3345□ctg4227□WAG-23N5  
ctg1445□ctg3345□ctg4227□WAG-110L3  
ctg1445□ctg3345□ctg5456□WAG-61F5  
ctg1445□ctg3345□ctg5456□WAG-81P18  
ctg1445□ctg3345□ctg6063□WAG-9A16  
ctg1445□ctg3345□ctg6063□WAG-86M14  
ctg1445□ctg4371□□WAG-105O7  
ctg1445□ctg4371□ctg6537□WAG-88J17  
ctg1445□ctg4371□ctg6537□WAG-107P16  
ctg1446□ctg2775□ctg2756□WAG-24F8  
ctg1446□ctg2775□ctg2756□WAG-57E5  
ctg1446□ctg2775□ctg2756□WAG-90A19  
ctg1447□□□WAG-40D17  
ctg1447□□□WAG-60N15  
ctg1447□ctg3350□ctg3414□WAG-33I3  
ctg1447□ctg3350□ctg3414□WAG-47A9  
ctg1447□ctg3350□ctg3414□WAG-60E5  
ctg1448□□□WAG-6B22  
ctg1448□□□WAG-6N21  
ctg1448□□□WAG-72O7  
ctg1448□ctg2779□ctg2763□WAG-13H15  
ctg1448□ctg2779□ctg2763□WAG-23B15  
ctg1448□ctg2779□ctg2763□WAG-32A16  
ctg1448□ctg2779□ctg2763□WAG-43P4  
ctg1449□ctg2783□ctg2768□WAG-58B9  
ctg1449□ctg2783□ctg2768□WAG-62A20  
ctg1449□ctg2783□ctg2768□WAG-78K24  
ctg145□□□WAG-127D8  
ctg145□ctg436□ctg344□WAG-19L10  
ctg145□ctg436□ctg344□WAG-43K21  
ctg145□ctg436□ctg344□WAG-46P21  
ctg145□ctg436□ctg344□WAG-57D18  
ctg145□ctg436□ctg344□WAG-67D8  
ctg145□ctg436□ctg344□WAG-70E21  
ctg145□ctg436□ctg344□WAG-77N22  
ctg145□ctg436□ctg344□WAG-84D6  
ctg145□ctg436□ctg344□WAG-118J5  
ctg1450□□□WAG-32E17  
ctg1450□ctg3907□ctg4188□WAG-39J7  
ctg1450□ctg3907□ctg4188□WAG-110M8  
ctg1450□ctg3907□ctg4188□WAG-113O15  
ctg1451□ctg2788□ctg2777□WAG-28E20  
ctg1451□ctg2788□ctg2777□WAG-49G11  
ctg1451□ctg2788□ctg2777□WAG-61P10  
ctg1452□□□WAG-84K14

ctg1452□ctg3271□□WAG-62I24  
ctg1452□ctg3271□□WAG-97K9  
ctg1452□ctg3271□ctg6105□WAG-44F24  
ctg1452□ctg3271□ctg6105□WAG-77A21  
ctg1453□ctg2923□□WAG-112E10  
ctg1453□ctg2923□ctg3327□WAG-18E1  
ctg1453□ctg2923□ctg3327□WAG-56H6  
ctg1453□ctg2923□ctg3327□WAG-70I7  
ctg1454□□□WAG-24H17  
ctg1454□□□WAG-64N7  
ctg1454□□□WAG-69N1  
ctg1454□ctg3279□□WAG-13A6  
ctg1454□ctg3279□ctg4281□WAG-26N4  
ctg1454□ctg3279□ctg4281□WAG-122I6  
ctg1454□ctg5785□□WAG-37J22  
ctg1454□ctg5785□□WAG-119P3  
ctg1455□□□WAG-22H11  
ctg1455□ctg3282□ctg3333□WAG-63B16  
ctg1455□ctg3282□ctg3333□WAG-69D15  
ctg1455□ctg3282□ctg3333□WAG-129H15  
ctg1456□ctg2794□ctg2782□WAG-44N10  
ctg1456□ctg2794□ctg2782□WAG-115F9  
ctg1456□ctg2794□ctg2782□WAG-126D2  
ctg1457□ctg2796□ctg2785□WAG-46C19  
ctg1457□ctg2796□ctg2785□WAG-100B11  
ctg1457□ctg2796□ctg2785□WAG-114F17  
ctg1458□□□WAG-75E5  
ctg1458□ctg3368□ctg3440□WAG-6A16  
ctg1458□ctg3368□ctg3440□WAG-41A19  
ctg1458□ctg3368□ctg3440□WAG-71G6  
ctg1459□□□WAG-130F24  
ctg1459□ctg3288□ctg4410□WAG-21O2  
ctg1459□ctg3288□ctg4410□WAG-76N21  
ctg1459□ctg3288□ctg5361□WAG-43G20  
ctg1459□ctg3288□ctg5361□WAG-72E15  
ctg146□ctg439□□WAG-57J7  
ctg146□ctg439□□WAG-67L21  
ctg146□ctg439□ctg348□WAG-31B3  
ctg146□ctg439□ctg348□WAG-43L23  
ctg146□ctg439□ctg348□WAG-45I7  
ctg146□ctg439□ctg348□WAG-64O11  
ctg146□ctg439□ctg348□WAG-83D16  
ctg146□ctg439□ctg348□WAG-109C6  
ctg146□ctg439□ctg348□WAG-112N11  
ctg1460□ctg3292□ctg3342□WAG-10K7  
ctg1460□ctg3292□ctg3342□WAG-16A23  
ctg1460□ctg3292□ctg3342□WAG-20B20  
ctg1460□ctg3842□□WAG-102E22  
ctg1460□ctg3842□ctg4948□WAG-73J22  
ctg1460□ctg3842□ctg4948□WAG-130I22  
ctg1461□□□WAG-76L10  
ctg1461□□□WAG-84A22  
ctg1461□ctg4079□□WAG-14M15  
ctg1461□ctg4079□□WAG-69F19  
ctg1461□ctg4079□ctg5668□WAG-89D11  
ctg1461□ctg4079□ctg5668□WAG-127K16

ctg1462□□□WAG-44I3  
ctg1462□ctg3258□ctg3304□WAG-9B7  
ctg1462□ctg3258□ctg3304□WAG-15E20  
ctg1462□ctg3258□ctg3304□WAG-86O18  
ctg1463□ctg2805□ctg3238□WAG-53N22  
ctg1463□ctg2805□ctg3238□WAG-95J22  
ctg1463□ctg2805□ctg3238□WAG-107E24  
ctg1463□ctg2805□ctg3238□WAG-110A2  
ctg1464□ctg2808□ctg2800□WAG-86L4  
ctg1464□ctg2808□ctg2800□WAG-97C13  
ctg1464□ctg2808□ctg2800□WAG-97H15  
ctg1465□ctg2809□□WAG-99J20  
ctg1465□ctg2809□ctg3614□WAG-115D17  
ctg1465□ctg2809□ctg3614□WAG-124D21  
ctg1465□ctg2809□ctg3614□WAG-126D14  
ctg1466□ctg2811□□WAG-4K21  
ctg1466□ctg2811□□WAG-96M16  
ctg1466□ctg2811□□WAG-97B18  
ctg1466□ctg2811□ctg4730□WAG-4I14  
ctg1466□ctg2811□ctg4730□WAG-18G7  
ctg1466□ctg5754□□WAG-57B17  
ctg1466□ctg5754□□WAG-119C22  
ctg1467□□□WAG-14K22  
ctg1467□ctg3393□ctg3487□WAG-104L5  
ctg1467□ctg3393□ctg3487□WAG-122E5  
ctg1467□ctg3393□ctg3487□WAG-126L7  
ctg1468□□□WAG-55K23  
ctg1468□ctg3309□ctg3371□WAG-47M15  
ctg1468□ctg3309□ctg3371□WAG-87L24  
ctg1468□ctg3309□ctg3371□WAG-120M18  
ctg1469□□□WAG-38I4  
ctg1469□ctg2824□□WAG-119F14  
ctg1469□ctg2824□ctg3851□WAG-15N6  
ctg1469□ctg2824□ctg3851□WAG-15N14  
ctg1469□ctg3761□□WAG-112J17  
ctg1469□ctg3761□ctg5228□WAG-30M3  
ctg1469□ctg3761□ctg5228□WAG-87A23  
ctg147□□□WAG-87I21  
ctg147□ctg5025□ctg5519□WAG-25B8  
ctg147□ctg5025□ctg5519□WAG-58G24  
ctg147□ctg668□ctg688□WAG-16C18  
ctg147□ctg668□ctg688□WAG-48F17  
ctg147□ctg668□ctg688□WAG-50N9  
ctg147□ctg668□ctg688□WAG-63I9  
ctg147□ctg668□ctg688□WAG-63M10  
ctg147□ctg668□ctg688□WAG-67L1  
ctg147□ctg668□ctg688□WAG-69H19  
ctg147□ctg668□ctg688□WAG-74G6  
ctg147□ctg668□ctg688□WAG-86I8  
ctg147□ctg668□ctg688□WAG-92A15  
ctg147□ctg668□ctg688□WAG-96M15  
ctg147□ctg668□ctg688□WAG-102N2  
ctg147□ctg668□ctg688□WAG-104K7  
ctg147□ctg668□ctg688□WAG-111K21  
ctg147□ctg668□ctg688□WAG-111L18  
ctg147□ctg668□ctg688□WAG-113H3

ctg147□ctg668□ctg688□WAG-117L12  
ctg1470□□□WAG-129F18  
ctg1470□ctg3313□ctg3375□WAG-22J20  
ctg1470□ctg3313□ctg3375□WAG-88E20  
ctg1470□ctg3313□ctg3375□WAG-109H3  
ctg1470□ctg4847□□WAG-47C19  
ctg1470□ctg4847□□WAG-125D2  
ctg1470□ctg4847□ctg5485□WAG-72D3  
ctg1470□ctg4847□ctg5485□WAG-129E17  
ctg1471□□□WAG-42D3  
ctg1471□□□WAG-115E9  
ctg1471□ctg3981□ctg4248□WAG-24K5  
ctg1471□ctg3981□ctg4248□WAG-25K11  
ctg1471□ctg5472□ctg6541□WAG-96B14  
ctg1471□ctg5472□ctg6541□WAG-102B10  
ctg1472□ctg2827□□WAG-116F3  
ctg1472□ctg2827□ctg3645□WAG-38P18  
ctg1472□ctg2827□ctg3645□WAG-48E21  
ctg1472□ctg2827□ctg3645□WAG-106H9  
ctg1472□ctg2827□ctg3645□WAG-108B14  
ctg1473□ctg2829□ctg2821□WAG-12H13  
ctg1473□ctg2829□ctg2821□WAG-36F12  
ctg1473□ctg2829□ctg2821□WAG-117D2  
ctg1474□ctg2831□□WAG-58N20  
ctg1474□ctg2831□□WAG-74N15  
ctg1474□ctg2831□□WAG-129O3  
ctg1474□ctg2831□ctg5171□WAG-42I15  
ctg1474□ctg2831□ctg5171□WAG-64E1  
ctg1475□□□WAG-28A13  
ctg1475□ctg2838□ctg3667□WAG-63I12  
ctg1475□ctg2838□ctg3667□WAG-90G4  
ctg1475□ctg2838□ctg6270□WAG-72E8  
ctg1475□ctg2838□ctg6270□WAG-74C6  
ctg1476□ctg2840□ctg4323□WAG-29P13  
ctg1476□ctg2840□ctg4323□WAG-81J8  
ctg1476□ctg2840□ctg4999□WAG-78A19  
ctg1476□ctg2840□ctg4999□WAG-86O15  
ctg1477□□□WAG-73B21  
ctg1477□ctg3420□ctg3904□WAG-72A22  
ctg1477□ctg3420□ctg3904□WAG-90F22  
ctg1477□ctg3420□ctg3904□WAG-122M14  
ctg1477□ctg3420□ctg3904□WAG-126P10  
ctg1478□□□WAG-57B23  
ctg1478□ctg3471□□WAG-5O22  
ctg1478□ctg3471□□WAG-80E19  
ctg1478□ctg3471□ctg6308□WAG-94O16  
ctg1478□ctg3471□ctg6308□WAG-107M14  
ctg1479□ctg2845□ctg2834□WAG-58L17  
ctg1479□ctg2845□ctg2834□WAG-72G13  
ctg1479□ctg2845□ctg2834□WAG-97A23  
ctg148□□□WAG-12O16  
ctg148□□□WAG-55E9  
ctg148□□□WAG-65K22  
ctg148□ctg3626□ctg3812□WAG-46B2  
ctg148□ctg3626□ctg3812□WAG-63J4  
ctg148□ctg5833□ctg6911□WAG-2H13

ctg148□ctg5833□ctg6911□WAG-7D20  
ctg148□ctg5833□ctg6911□WAG-105P13  
ctg148□ctg669□ctg543□WAG-13N9  
ctg148□ctg669□ctg543□WAG-14H3  
ctg148□ctg669□ctg543□WAG-17C1  
ctg148□ctg669□ctg543□WAG-42L1  
ctg148□ctg669□ctg543□WAG-59C1  
ctg148□ctg669□ctg543□WAG-71L19  
ctg148□ctg669□ctg543□WAG-82M21  
ctg148□ctg669□ctg543□WAG-97A3  
ctg148□ctg669□ctg543□WAG-125G17  
ctg148□ctg669□ctg543□WAG-127G1  
ctg148□ctg669□ctg543□WAG-129O23  
ctg1480□□□WAG-92I13  
ctg1480□□□WAG-128D14  
ctg1480□ctg3098□ctg3097□WAG-44K8  
ctg1480□ctg3098□ctg3097□WAG-62E12  
ctg1480□ctg3098□ctg3097□WAG-104L7  
ctg1480□ctg4875□ctg5175□WAG-87G2  
ctg1480□ctg4875□ctg5175□WAG-113B19  
ctg1480□ctg5324□ctg6211□WAG-39J22  
ctg1480□ctg5324□ctg6211□WAG-78O12  
ctg1481□ctg2849□□WAG-55M22  
ctg1481□ctg2849□ctg3676□WAG-3D4  
ctg1481□ctg2849□ctg3676□WAG-117N12  
ctg1481□ctg2849□ctg3676□WAG-118K15  
ctg1482□ctg3114□ctg3113□WAG-16C14  
ctg1482□ctg3114□ctg3113□WAG-104H7  
ctg1482□ctg3114□ctg3113□WAG-109F18  
ctg1482□ctg5811□□WAG-67O7  
ctg1482□ctg5811□□WAG-129F13  
ctg1482□ctg5814□□WAG-56O12  
ctg1482□ctg5814□□WAG-63L20  
ctg1483□ctg3724□ctg3941□WAG-72D16  
ctg1483□ctg3724□ctg3941□WAG-95L15  
ctg1483□ctg3724□ctg3941□WAG-98M1  
ctg1483□ctg6389□□WAG-12F1  
ctg1483□ctg6389□□WAG-82G2  
ctg1484□□□WAG-38L19  
ctg1484□□□WAG-84G14  
ctg1484□ctg4880□ctg5187□WAG-83F2  
ctg1484□ctg4880□ctg5187□WAG-130G8  
ctg1484□ctg6349□□WAG-65F17  
ctg1484□ctg6349□□WAG-88L4  
ctg1485□□□WAG-54H20  
ctg1485□ctg3348□□WAG-26L1  
ctg1485□ctg3348□ctg4502□WAG-101I20  
ctg1485□ctg3348□ctg4502□WAG-129D1  
ctg1486□□□WAG-44B18  
ctg1486□□□WAG-60I6  
ctg1486□ctg4150□□WAG-79M16  
ctg1486□ctg4150□ctg6378□WAG-40O7  
ctg1486□ctg4150□ctg6378□WAG-99G14  
ctg1487□□□WAG-2J18  
ctg1487□□□WAG-55M4  
ctg1487□ctg3545□ctg3695□WAG-20B21

ctg1487□ctg3545□ctg3695□WAG-29D19  
ctg1487□ctg3545□ctg3695□WAG-52B8  
ctg1487□ctg3545□ctg3695□WAG-122O1  
ctg1488□ctg2857□ctg3626□WAG-6L14  
ctg1488□ctg2857□ctg3626□WAG-33H16  
ctg1488□ctg2857□ctg3626□WAG-54E10  
ctg1488□ctg2857□ctg3626□WAG-99I11  
ctg1489□□□WAG-70A8  
ctg1489□ctg4312□ctg4505□WAG-67D10  
ctg1489□ctg4312□ctg4505□WAG-98C16  
ctg1489□ctg4596□□WAG-1P21  
ctg1489□ctg4596□□WAG-36P21  
ctg1489□ctg4596□□WAG-55I11  
ctg1489□ctg4596□□WAG-72L3  
ctg1489□ctg4596□□WAG-116L15  
ctg149□ctg442□ctg501□WAG-29E9  
ctg149□ctg442□ctg501□WAG-37J7  
ctg149□ctg442□ctg501□WAG-57G18  
ctg149□ctg442□ctg501□WAG-67C14  
ctg149□ctg442□ctg501□WAG-79P20  
ctg149□ctg442□ctg501□WAG-89G7  
ctg149□ctg442□ctg501□WAG-127H11  
ctg1490□□□WAG-10E12  
ctg1490□□□WAG-28K17  
ctg1490□ctg3435□ctg3550□WAG-3G1  
ctg1490□ctg3435□ctg3550□WAG-3P8  
ctg1490□ctg3435□ctg3550□WAG-7P9  
ctg1490□ctg6399□□WAG-57D20  
ctg1490□ctg6399□□WAG-103I1  
ctg1491□□□WAG-6E18  
ctg1491□ctg4008□ctg5541□WAG-106C24  
ctg1491□ctg4008□ctg5541□WAG-117G10  
ctg1491□ctg4008□ctg5968□WAG-69P11  
ctg1491□ctg4008□ctg5968□WAG-89D22  
ctg1491□ctg6306□□WAG-45E22  
ctg1491□ctg6306□□WAG-64B3  
ctg1492□ctg3034□□WAG-102O2  
ctg1492□ctg3034□ctg4441□WAG-92B6  
ctg1492□ctg3034□ctg4441□WAG-98B1  
ctg1492□ctg3034□ctg4441□WAG-119H21  
ctg1492□ctg3034□ctg6074□WAG-40A11  
ctg1492□ctg3034□ctg6074□WAG-67I15  
ctg1493□ctg2862□□WAG-33A15  
ctg1493□ctg2862□□WAG-40L12  
ctg1493□ctg2862□ctg4810□WAG-81B8  
ctg1493□ctg2862□ctg4810□WAG-99P2  
ctg1494□□□WAG-29E5  
ctg1494□□□WAG-87I9  
ctg1494□□□WAG-111G3  
ctg1494□ctg4031□□WAG-55H6  
ctg1494□ctg4031□ctg5605□WAG-25A8  
ctg1494□ctg4031□ctg5605□WAG-52J6  
ctg1495□ctg3438□□WAG-34D16  
ctg1495□ctg3438□□WAG-70I9  
ctg1495□ctg3438□□WAG-90J17  
ctg1495□ctg3438□ctg6357□WAG-77O13

ctg1495□ctg3438□ctg6357□WAG-125F16  
ctg1496□□□WAG-22C11  
ctg1496□□□WAG-46B14  
ctg1496□□□WAG-90O12  
ctg1496□ctg4155□□WAG-30P11  
ctg1496□ctg4155□ctg5925□WAG-52B6  
ctg1496□ctg4155□ctg5925□WAG-118C22  
ctg1497□□□WAG-36J20  
ctg1497□□□WAG-84C14  
ctg1497□ctg3442□ctg3554□WAG-64L24  
ctg1497□ctg3442□ctg3554□WAG-77H8  
ctg1497□ctg3442□ctg3554□WAG-111J4  
ctg1498□ctg2920□ctg3921□WAG-49F24  
ctg1498□ctg2920□ctg3921□WAG-75M14  
ctg1498□ctg2920□ctg3921□WAG-77D10  
ctg1498□ctg2920□ctg3921□WAG-79K20  
ctg1498□ctg2920□ctg3921□WAG-121N14  
ctg1499□ctg2954□ctg4984□WAG-12J1  
ctg1499□ctg2954□ctg4984□WAG-35C12  
ctg1499□ctg2954□ctg5644□WAG-28F13  
ctg1499□ctg2954□ctg5644□WAG-50N6  
ctg1499□ctg4739□ctg4942□WAG-19E9  
ctg1499□ctg4739□ctg4942□WAG-25E13  
ctg1499□ctg5319□ctg6197□WAG-58C14  
ctg1499□ctg5319□ctg6197□WAG-126A5  
ctg15□□□WAG-25O21  
ctg15□□□WAG-60C16  
ctg15□ctg82□ctg94□WAG-6C17  
ctg15□ctg82□ctg94□WAG-6K16  
ctg15□ctg82□ctg94□WAG-8B21  
ctg15□ctg82□ctg94□WAG-9C3  
ctg15□ctg82□ctg94□WAG-35B18  
ctg15□ctg82□ctg94□WAG-53C19  
ctg15□ctg82□ctg94□WAG-60N2  
ctg15□ctg82□ctg94□WAG-71L14  
ctg15□ctg82□ctg94□WAG-75G8  
ctg15□ctg82□ctg94□WAG-77E1  
ctg15□ctg82□ctg94□WAG-78D22  
ctg15□ctg82□ctg94□WAG-79N3  
ctg15□ctg82□ctg94□WAG-83N6  
ctg15□ctg82□ctg94□WAG-94F7  
ctg15□ctg82□ctg94□WAG-100C21  
ctg15□ctg82□ctg94□WAG-111F7  
ctg15□ctg82□ctg94□WAG-116M20  
ctg15□ctg82□ctg94□WAG-117E17  
ctg15□ctg831□ctg851□WAG-26E3  
ctg15□ctg831□ctg851□WAG-39H9  
ctg15□ctg831□ctg851□WAG-41P5  
ctg15□ctg831□ctg851□WAG-47I9  
ctg15□ctg831□ctg851□WAG-50I13  
ctg15□ctg831□ctg851□WAG-60H2  
ctg15□ctg831□ctg851□WAG-66I4  
ctg15□ctg831□ctg851□WAG-90D1  
ctg15□ctg831□ctg851□WAG-106A17  
ctg15□ctg831□ctg851□WAG-108N8  
ctg15□ctg831□ctg851□WAG-119C5

ctg150□ctg518□□WAG-4A24  
ctg150□ctg518□□WAG-27F5  
ctg150□ctg518□□WAG-46A4  
ctg150□ctg518□□WAG-110L9  
ctg150□ctg518□□WAG-112L21  
ctg150□ctg518□ctg4105□WAG-79E7  
ctg150□ctg518□ctg4105□WAG-101I18  
ctg150□ctg518□ctg4105□WAG-130L4  
ctg150□ctg518□ctg913□WAG-33B23  
ctg150□ctg518□ctg913□WAG-56B23  
ctg150□ctg518□ctg913□WAG-69D4  
ctg150□ctg518□ctg913□WAG-73P12  
ctg150□ctg518□ctg913□WAG-80L18  
ctg150□ctg518□ctg913□WAG-90J2  
ctg150□ctg518□ctg913□WAG-102M18  
ctg150□ctg518□ctg913□WAG-108N24  
ctg150□ctg518□ctg913□WAG-109J8  
ctg150□ctg518□ctg913□WAG-116B20  
ctg150□ctg518□ctg913□WAG-125E6  
ctg1500□□□WAG-50L15  
ctg1500□ctg2866□ctg2857□WAG-105G9  
ctg1500□ctg2866□ctg2857□WAG-112G19  
ctg1500□ctg2866□ctg2857□WAG-124H8  
ctg1500□ctg2866□ctg2857□WAG-126O6  
ctg1501□ctg4037□ctg4300□WAG-8A18  
ctg1501□ctg4037□ctg4300□WAG-61N11  
ctg1501□ctg4181□□WAG-102N17  
ctg1501□ctg4181□ctg6552□WAG-76D18  
ctg1501□ctg4181□ctg6552□WAG-92I4  
ctg1501□ctg4473□□WAG-16F19  
ctg1501□ctg4473□□WAG-35I24  
ctg1501□ctg4473□□WAG-50H24  
ctg1502□ctg3449□□WAG-50I6  
ctg1502□ctg3449□□WAG-115O7  
ctg1502□ctg3449□ctg3560□WAG-1P12  
ctg1502□ctg3449□ctg3560□WAG-61F7  
ctg1502□ctg3449□ctg3560□WAG-128D11  
ctg1503□□□WAG-30M7  
ctg1503□□□WAG-94I14  
ctg1503□ctg2878□□WAG-125L6  
ctg1503□ctg2878□ctg3914□WAG-41B22  
ctg1503□ctg2878□ctg3914□WAG-87G14  
ctg1503□ctg2878□ctg3914□WAG-118A8  
ctg1503□ctg2878□ctg4728□WAG-10H2  
ctg1503□ctg2878□ctg4728□WAG-128D15  
ctg1504□□□WAG-83M9  
ctg1504□ctg3148□□WAG-26J7  
ctg1504□ctg3148□ctg4156□WAG-16K10  
ctg1504□ctg3148□ctg4156□WAG-35E6  
ctg1504□ctg3148□ctg4156□WAG-110J18  
ctg1505□ctg2882□ctg2873□WAG-30B13  
ctg1505□ctg2882□ctg2873□WAG-64O12  
ctg1505□ctg2882□ctg2873□WAG-83J18  
ctg1506□ctg2885□ctg2877□WAG-26O18  
ctg1506□ctg2885□ctg2877□WAG-66J12  
ctg1506□ctg2885□ctg2877□WAG-80O19



ctg1506□ctg2885□ctg2877□WAG-125E19  
ctg1507□□□WAG-80P9  
ctg1507□ctg3360□□WAG-55L8  
ctg1507□ctg3360□ctg4364□WAG-12M19  
ctg1507□ctg3360□ctg4364□WAG-73O23  
ctg1507□ctg3360□ctg4364□WAG-80B12  
ctg1507□ctg3569□□WAG-87P12  
ctg1507□ctg3569□ctg4805□WAG-18G24  
ctg1507□ctg3569□ctg4805□WAG-126K12  
ctg1508□□□WAG-39N17  
ctg1508□□□WAG-105I5  
ctg1508□ctg2891□□WAG-117N6  
ctg1508□ctg2891□ctg3927□WAG-100D4  
ctg1508□ctg2891□ctg3927□WAG-114P20  
ctg1509□ctg2893□□WAG-1K19  
ctg1509□ctg2893□□WAG-1K20  
ctg1509□ctg2893□□WAG-15K14  
ctg1509□ctg2893□□WAG-102A23  
ctg1509□ctg2893□ctg4859□WAG-19E8  
ctg1509□ctg2893□ctg4859□WAG-72I3  
ctg151□ctg519□ctg423□WAG-33H7  
ctg151□ctg519□ctg423□WAG-45O11  
ctg151□ctg519□ctg423□WAG-52J10  
ctg151□ctg519□ctg423□WAG-67D15  
ctg151□ctg519□ctg423□WAG-108F24  
ctg151□ctg519□ctg423□WAG-119G24  
ctg151□ctg519□ctg423□WAG-127A10  
ctg1510□ctg2896□□WAG-8E24  
ctg1510□ctg2896□ctg3635□WAG-15B18  
ctg1510□ctg2896□ctg3635□WAG-129B1  
ctg1511□□□WAG-37I20  
ctg1511□ctg3017□ctg3007□WAG-63P8  
ctg1511□ctg3017□ctg3007□WAG-87I10  
ctg1511□ctg3017□ctg3007□WAG-124J6  
ctg1512□ctg3369□□WAG-99B7  
ctg1512□ctg3369□ctg3442□WAG-15M3  
ctg1512□ctg3369□ctg3442□WAG-29K13  
ctg1512□ctg3369□ctg3442□WAG-71P24  
ctg1513□ctg2900□ctg2885□WAG-31F19  
ctg1513□ctg2900□ctg2885□WAG-43G1  
ctg1513□ctg2900□ctg2885□WAG-107G2  
ctg1514□□□WAG-4I10  
ctg1514□ctg3297□□WAG-107N18  
ctg1514□ctg3297□ctg4341□WAG-57N11  
ctg1514□ctg3297□ctg4341□WAG-120F21  
ctg1515□□□WAG-6H18  
ctg1515□□□WAG-39L9  
ctg1515□□□WAG-123F20  
ctg1515□ctg3298□□WAG-55N16  
ctg1515□ctg3298□ctg3352□WAG-32A9  
ctg1515□ctg3298□ctg3352□WAG-55G21  
ctg1515□ctg3298□ctg3352□WAG-106P24  
ctg1515□ctg3298□ctg4600□WAG-123J20  
ctg1515□ctg3298□ctg4600□WAG-127F8  
ctg1515□ctg3695□□WAG-28L15  
ctg1515□ctg3695□ctg4843□WAG-40P17

ctg1515□ctg3695□ctg4843□WAG-45N19  
ctg1516□ctg2903□ctg4627□WAG-65K21  
ctg1516□ctg2903□ctg4627□WAG-120B14  
ctg1516□ctg2903□ctg4665□WAG-97G17  
ctg1516□ctg2903□ctg4665□WAG-122P2  
ctg1517□□□WAG-14K3  
ctg1517□□□WAG-16L24  
ctg1517□ctg3218□□WAG-48M1  
ctg1517□ctg3218□ctg3453□WAG-41F20  
ctg1517□ctg3218□ctg3453□WAG-50L6  
ctg1517□ctg3218□ctg3453□WAG-52E9  
ctg1518□ctg3379□ctg4580□WAG-17C19  
ctg1518□ctg3379□ctg4580□WAG-65C24  
ctg1518□ctg3379□ctg6734□WAG-96E5  
ctg1518□ctg3379□ctg6734□WAG-98C5  
ctg1519□□□WAG-24H12  
ctg1519□ctg4082□□WAG-16I23  
ctg1519□ctg4082□ctg6129□WAG-26E6  
ctg1519□ctg4082□ctg6129□WAG-67O9  
ctg1519□ctg5580□ctg6721□WAG-113D7  
ctg1519□ctg5580□ctg6721□WAG-130N24  
ctg152□□□WAG-35P11  
ctg152□ctg4755□ctg4960□WAG-7N10  
ctg152□ctg4755□ctg4960□WAG-97M20  
ctg152□ctg868□□WAG-4O11  
ctg152□ctg868□ctg986□WAG-27N2  
ctg152□ctg868□ctg986□WAG-33L6  
ctg152□ctg868□ctg986□WAG-57B1  
ctg152□ctg868□ctg986□WAG-82A15  
ctg152□ctg868□ctg986□WAG-86G14  
ctg152□ctg868□ctg986□WAG-93J24  
ctg152□ctg868□ctg986□WAG-95C10  
ctg152□ctg868□ctg986□WAG-104F10  
ctg152□ctg868□ctg986□WAG-121E22  
ctg152□ctg868□ctg986□WAG-127K17  
ctg1520□ctg3131□ctg3140□WAG-13I6  
ctg1520□ctg3131□ctg3140□WAG-106F10  
ctg1520□ctg3131□ctg3140□WAG-109K24  
ctg1520□ctg3131□ctg3140□WAG-117N21  
ctg1521□□□WAG-3K2  
ctg1521□ctg2906□ctg4869□WAG-32L10  
ctg1521□ctg2906□ctg4869□WAG-110P5  
ctg1521□ctg2906□ctg6188□WAG-8N15  
ctg1521□ctg2906□ctg6188□WAG-96C20  
ctg1522□□□WAG-95P19  
ctg1522□ctg3385□ctg3470□WAG-26O6  
ctg1522□ctg3385□ctg3470□WAG-72D17  
ctg1522□ctg3385□ctg3470□WAG-107C8  
ctg1523□□□WAG-76A22  
ctg1523□□□WAG-104F18  
ctg1523□□□WAG-119M12  
ctg1523□ctg3952□□WAG-77D20  
ctg1523□ctg3952□ctg5418□WAG-15M13  
ctg1523□ctg3952□ctg5418□WAG-25E9  
ctg1524□ctg2916□□WAG-71A10  
ctg1524□ctg2916□ctg3796□WAG-45B14

ctg1524□ctg2916□ctg3796□WAG-60B10  
ctg1524□ctg2916□ctg3796□WAG-111A2  
ctg1525□□□WAG-14H14  
ctg1525□ctg3392□ctg5003□WAG-63I7  
ctg1525□ctg3392□ctg5003□WAG-79G20  
ctg1525□ctg3392□ctg6758□WAG-2K12  
ctg1525□ctg3392□ctg6758□WAG-49P12  
ctg1526□ctg2924□□WAG-16M8  
ctg1526□ctg2924□□WAG-23A19  
ctg1526□ctg2924□ctg3959□WAG-46G20  
ctg1526□ctg2924□ctg3959□WAG-56F7  
ctg1526□ctg2924□ctg3959□WAG-90H10  
ctg1527□□□WAG-8I1  
ctg1527□ctg3513□ctg3643□WAG-96G16  
ctg1527□ctg3513□ctg3643□WAG-114P8  
ctg1527□ctg3513□ctg3643□WAG-117F11  
ctg1527□ctg3513□ctg3643□WAG-128B15  
ctg1528□□□WAG-56G19  
ctg1528□ctg3482□□WAG-57J1  
ctg1528□ctg3482□ctg4702□WAG-15C1  
ctg1528□ctg3482□ctg4702□WAG-108B24  
ctg1529□ctg2926□□WAG-95N18  
ctg1529□ctg2926□ctg3975□WAG-18J17  
ctg1529□ctg2926□ctg3975□WAG-28C23  
ctg1529□ctg2926□ctg3975□WAG-76J19  
ctg153□□□WAG-101M17  
ctg153□□□WAG-113B10  
ctg153□ctg450□ctg360□WAG-2J14  
ctg153□ctg450□ctg360□WAG-22C18  
ctg153□ctg450□ctg360□WAG-48I5  
ctg153□ctg450□ctg360□WAG-77L1  
ctg153□ctg450□ctg360□WAG-105H16  
ctg153□ctg450□ctg360□WAG-123P10  
ctg153□ctg6147□□WAG-41J21  
ctg153□ctg6147□□WAG-110K23  
ctg1530□□□WAG-16M11  
ctg1530□□□WAG-55B20  
ctg1530□□□WAG-83L23  
ctg1530□□□WAG-92L17  
ctg1530□ctg3431□ctg3540□WAG-9O1  
ctg1530□ctg3431□ctg3540□WAG-20P16  
ctg1530□ctg3431□ctg3540□WAG-33D23  
ctg1530□ctg3432□ctg3541□WAG-2C20  
ctg1530□ctg3432□ctg3541□WAG-26I5  
ctg1530□ctg3432□ctg3541□WAG-88F23  
ctg1530□ctg3432□ctg3541□WAG-107L10  
ctg1531□□□WAG-47N17  
ctg1531□□□WAG-57N12  
ctg1531□ctg2931□□WAG-76H6  
ctg1531□ctg2931□□WAG-88B16  
ctg1531□ctg2931□ctg4677□WAG-91O2  
ctg1531□ctg2931□ctg4677□WAG-129B3  
ctg1532□ctg2932□□WAG-97K18  
ctg1532□ctg2932□ctg3981□WAG-16O4  
ctg1532□ctg2932□ctg3981□WAG-24D19  
ctg1532□ctg2932□ctg3981□WAG-119A22

ctg1532□ctg2932□ctg5701□WAG-47D6  
ctg1532□ctg2932□ctg5701□WAG-124I21  
ctg1533□ctg2933□ctg3986□WAG-46G10  
ctg1533□ctg2933□ctg3986□WAG-67H14  
ctg1533□ctg2933□ctg3986□WAG-76J5  
ctg1534□ctg2934□□WAG-14F14  
ctg1534□ctg2934□□WAG-67I9  
ctg1534□ctg2934□ctg3821□WAG-64D11  
ctg1534□ctg2934□ctg3821□WAG-66J6  
ctg1534□ctg2934□ctg3821□WAG-119P22  
ctg1535□ctg2935□ctg2909□WAG-62M10  
ctg1535□ctg2935□ctg2909□WAG-94O3  
ctg1535□ctg2935□ctg2909□WAG-129P20  
ctg1536□ctg2939□□WAG-29H21  
ctg1536□ctg2939□□WAG-52A18  
ctg1536□ctg2939□ctg3136□WAG-23C8  
ctg1536□ctg2939□ctg3136□WAG-37C11  
ctg1536□ctg2939□ctg3136□WAG-111N15  
ctg1537□ctg3275□□WAG-98A13  
ctg1537□ctg3275□ctg4617□WAG-33A21  
ctg1537□ctg3275□ctg4617□WAG-57K13  
ctg1537□ctg3275□ctg6695□WAG-38N4  
ctg1537□ctg3275□ctg6695□WAG-81N2  
ctg1537□ctg6198□□WAG-13G5  
ctg1537□ctg6198□□WAG-45E19  
ctg1538□□□WAG-107A14  
ctg1538□ctg2941□□WAG-20H18  
ctg1538□ctg2941□ctg3991□WAG-28E19  
ctg1538□ctg2941□ctg3991□WAG-29N24  
ctg1538□ctg2941□ctg3991□WAG-43M16  
ctg1539□ctg2943□□WAG-25J3  
ctg1539□ctg2943□□WAG-46M16  
ctg1539□ctg2943□ctg4466□WAG-42K13  
ctg1539□ctg2943□ctg4466□WAG-102G13  
ctg154□□□WAG-6E5  
ctg154□□□WAG-40P5  
ctg154□ctg542□ctg2655□WAG-104A17  
ctg154□ctg542□ctg2655□WAG-121H24  
ctg154□ctg542□ctg594□WAG-29J16  
ctg154□ctg542□ctg594□WAG-56N8  
ctg154□ctg542□ctg594□WAG-85H21  
ctg154□ctg542□ctg594□WAG-95H3  
ctg154□ctg542□ctg594□WAG-104N22  
ctg154□ctg641□ctg522□WAG-25B2  
ctg154□ctg641□ctg522□WAG-27F1  
ctg154□ctg641□ctg522□WAG-80H10  
ctg154□ctg641□ctg522□WAG-110E3  
ctg154□ctg641□ctg522□WAG-112G14  
ctg154□ctg641□ctg522□WAG-127D5  
ctg1540□ctg2944□ctg2919□WAG-54J16  
ctg1540□ctg2944□ctg2919□WAG-65P14  
ctg1540□ctg2944□ctg2919□WAG-67L9  
ctg1541□ctg3406□□WAG-41P21  
ctg1541□ctg3406□ctg3500□WAG-22D8  
ctg1541□ctg3406□ctg3500□WAG-60M10  
ctg1541□ctg3406□ctg3500□WAG-61G3

ctg1541□ctg5803□□WAG-34G23  
ctg1541□ctg5803□□WAG-91C9  
ctg1542□ctg2949□ctg3958□WAG-2L3  
ctg1542□ctg2949□ctg3958□WAG-44L3  
ctg1542□ctg2949□ctg3958□WAG-60L11  
ctg1542□ctg2949□ctg3958□WAG-126E14  
ctg1543□ctg2951□ctg3683□WAG-48D15  
ctg1543□ctg2951□ctg3683□WAG-67C13  
ctg1543□ctg2951□ctg3683□WAG-118I23  
ctg1543□ctg2951□ctg3683□WAG-125O23  
ctg1544□ctg2952□ctg2928□WAG-60G17  
ctg1544□ctg2952□ctg2928□WAG-75K3  
ctg1544□ctg2952□ctg2928□WAG-121K20  
ctg1545□□□WAG-38E11  
ctg1545□□□WAG-109I18  
ctg1545□ctg3523□ctg3663□WAG-12L16  
ctg1545□ctg3523□ctg3663□WAG-14O8  
ctg1545□ctg3523□ctg3663□WAG-52G19  
ctg1546□□□WAG-73J19  
ctg1546□ctg3526□□WAG-47G8  
ctg1546□ctg3526□ctg3828□WAG-59L18  
ctg1546□ctg3526□ctg3828□WAG-66P15  
ctg1546□ctg3526□ctg3828□WAG-83K15  
ctg1547□□□WAG-13F24  
ctg1547□□□WAG-38L21  
ctg1547□□□WAG-48A22  
ctg1547□ctg4002□□WAG-43J21  
ctg1547□ctg4002□ctg5836□WAG-92H11  
ctg1547□ctg4002□ctg5836□WAG-125P14  
ctg1548□ctg3428□□WAG-31L2  
ctg1548□ctg3428□ctg4621□WAG-44I22  
ctg1548□ctg3428□ctg4621□WAG-48C12  
ctg1548□ctg5164□ctg5858□WAG-25H14  
ctg1548□ctg5164□ctg5858□WAG-60O7  
ctg1549□□□WAG-62A7  
ctg1549□□□WAG-116A12  
ctg1549□ctg2961□□WAG-122F4  
ctg1549□ctg2961□ctg4756□WAG-48G12  
ctg1549□ctg2961□ctg4756□WAG-100J5  
ctg1549□ctg2961□ctg6776□WAG-11I7  
ctg1549□ctg2961□ctg6776□WAG-63A8  
ctg1549□ctg4947□ctg5318□WAG-9K6  
ctg1549□ctg4947□ctg5318□WAG-111I10  
ctg155□□□WAG-A3  
ctg155□ctg454□ctg431□WAG-19H4  
ctg155□ctg454□ctg431□WAG-42I12  
ctg155□ctg454□ctg431□WAG-50G21  
ctg155□ctg454□ctg431□WAG-59M9  
ctg155□ctg454□ctg431□WAG-70K4  
ctg155□ctg454□ctg431□WAG-76I6  
ctg155□ctg454□ctg431□WAG-105N22  
ctg155□ctg454□ctg431□WAG-106J21  
ctg1550□ctg3005□ctg2994□WAG-65A12  
ctg1550□ctg3005□ctg2994□WAG-69J22  
ctg1550□ctg3005□ctg2994□WAG-125C10  
ctg1550□ctg5167□ctg5862□WAG-22K2

ctg1550□ctg5167□ctg5862□WAG-47M9  
ctg1551□ctg2969□ctg2952□WAG-23D14  
ctg1551□ctg2969□ctg2952□WAG-42O22  
ctg1551□ctg2969□ctg2952□WAG-112K10  
ctg1552□□□WAG-32B18  
ctg1552□ctg2972□□WAG-58O3  
ctg1552□ctg2972□ctg4039□WAG-11E2  
ctg1552□ctg2972□ctg4039□WAG-76F23  
ctg1552□ctg2972□ctg4039□WAG-84A15  
ctg1553□□□WAG-48D24  
ctg1553□□□WAG-62G10  
ctg1553□□□WAG-73P17  
ctg1553□□□WAG-75B11  
ctg1553□ctg3446□□WAG-79C12  
ctg1553□ctg3446□ctg4403□WAG-47B3  
ctg1553□ctg3446□ctg4403□WAG-91L23  
ctg1554□ctg2973□□WAG-102H8  
ctg1554□ctg2973□ctg4050□WAG-15M12  
ctg1554□ctg2973□ctg4050□WAG-73B24  
ctg1554□ctg2973□ctg4050□WAG-77K15  
ctg1555□ctg3451□ctg3562□WAG-83F3  
ctg1555□ctg3451□ctg3562□WAG-91J18  
ctg1555□ctg3451□ctg3562□WAG-93J3  
ctg1555□ctg3451□ctg3562□WAG-114P14  
ctg1555□ctg4251□ctg4452□WAG-62L19  
ctg1555□ctg4251□ctg4452□WAG-104I7  
ctg1556□□□WAG-9L22  
ctg1556□ctg2980□□WAG-73B1  
ctg1556□ctg2980□ctg4059□WAG-4M22  
ctg1556□ctg2980□ctg4059□WAG-7C4  
ctg1556□ctg2980□ctg4059□WAG-48A19  
ctg1557□ctg2981□ctg2968□WAG-8O12  
ctg1557□ctg2981□ctg2968□WAG-19B7  
ctg1557□ctg2981□ctg2968□WAG-44G13  
ctg1557□ctg2981□ctg2968□WAG-71H14  
ctg1558□ctg2982□ctg3882□WAG-10M3  
ctg1558□ctg2982□ctg3882□WAG-17I22  
ctg1558□ctg2982□ctg3882□WAG-69P10  
ctg1558□ctg2982□ctg3882□WAG-117D5  
ctg1558□ctg3655□□WAG-40B17  
ctg1558□ctg3655□□WAG-87H7  
ctg1558□ctg3655□ctg6233□WAG-67L10  
ctg1558□ctg3655□ctg6233□WAG-95N8  
ctg1559□ctg3104□ctg3106□WAG-1C22  
ctg1559□ctg3104□ctg3106□WAG-18M24  
ctg1559□ctg3104□ctg3106□WAG-52I14  
ctg1559□ctg3104□ctg3106□WAG-112P23  
ctg156□ctg457□□WAG-26F12  
ctg156□ctg457□ctg365□WAG-24L19  
ctg156□ctg457□ctg365□WAG-32J16  
ctg156□ctg457□ctg365□WAG-51J18  
ctg156□ctg457□ctg365□WAG-87K18  
ctg156□ctg457□ctg365□WAG-98N5  
ctg156□ctg457□ctg365□WAG-104C7  
ctg156□ctg457□ctg365□WAG-109H11  
ctg156□ctg457□ctg365□WAG-110F15

ctg1560□ctg2987□□WAG-10K2  
ctg1560□ctg2987□ctg4062□WAG-21I8  
ctg1560□ctg2987□ctg4062□WAG-29M24  
ctg1560□ctg2987□ctg4062□WAG-69P21  
ctg1560□ctg2987□ctg5345□WAG-88J6  
ctg1560□ctg2987□ctg5345□WAG-108M13  
ctg1560□ctg2987□ctg6784□WAG-112O6  
ctg1560□ctg2987□ctg6784□WAG-128N8  
ctg1560□ctg6059□□WAG-33P23  
ctg1560□ctg6059□□WAG-89G1  
ctg1561□ctg2988□□WAG-77N2  
ctg1561□ctg2988□ctg4067□WAG-49P17  
ctg1561□ctg2988□ctg4067□WAG-78M20  
ctg1562□ctg2994□ctg2979□WAG-88J16  
ctg1562□ctg2994□ctg2979□WAG-119E7  
ctg1562□ctg2994□ctg2979□WAG-125F21  
ctg1563□ctg2995□□WAG-102P3  
ctg1563□ctg2995□ctg2981□WAG-50G6  
ctg1563□ctg2995□ctg2981□WAG-81B18  
ctg1563□ctg2995□ctg2981□WAG-115P15  
ctg1564□□□WAG-13K22  
ctg1564□□□WAG-24N21  
ctg1564□ctg2996□□WAG-85C1  
ctg1564□ctg2996□□WAG-110E4  
ctg1564□ctg2996□ctg3907□WAG-55F10  
ctg1564□ctg2996□ctg3907□WAG-61C6  
ctg1564□ctg2996□ctg3907□WAG-73M12  
ctg1565□□□WAG-93H20  
ctg1565□ctg3577□ctg3750□WAG-12K17  
ctg1565□ctg3577□ctg3750□WAG-59J6  
ctg1565□ctg3577□ctg3750□WAG-74F21  
ctg1565□ctg5836□□WAG-77F15  
ctg1565□ctg5836□□WAG-106C20  
ctg1566□ctg2998□ctg2984□WAG-53L7  
ctg1566□ctg2998□ctg2984□WAG-83D12  
ctg1566□ctg2998□ctg2984□WAG-91H12  
ctg1567□□□WAG-68L3  
ctg1567□ctg3578□□WAG-122F18  
ctg1567□ctg3578□ctg3753□WAG-46O22  
ctg1567□ctg3578□ctg3753□WAG-74H18  
ctg1567□ctg3578□ctg3753□WAG-96J15  
ctg1567□ctg4969□ctg5382□WAG-39H11  
ctg1567□ctg4969□ctg5382□WAG-118O9  
ctg1568□ctg3579□ctg4642□WAG-36G20  
ctg1568□ctg3579□ctg4642□WAG-124P9  
ctg1568□ctg3579□ctg4707□WAG-59L4  
ctg1568□ctg3579□ctg4707□WAG-101E22  
ctg1569□□□WAG-48D17  
ctg1569□□□WAG-60I1  
ctg1569□ctg3225□ctg3254□WAG-79L2  
ctg1569□ctg3225□ctg3254□WAG-107G6  
ctg1569□ctg3225□ctg3254□WAG-123E17  
ctg1569□ctg3225□ctg5315□WAG-18N12  
ctg1569□ctg3225□ctg5315□WAG-107J22  
ctg157□ctg809□□WAG-19L20  
ctg157□ctg809□□WAG-69M1

ctg157□ctg809□□WAG-107B19  
ctg157□ctg809□□WAG-129F23  
ctg157□ctg809□ctg1157□WAG-29H15  
ctg157□ctg809□ctg1157□WAG-41I17  
ctg157□ctg809□ctg1157□WAG-72L8  
ctg157□ctg809□ctg1157□WAG-80J19  
ctg157□ctg809□ctg1157□WAG-115A17  
ctg157□ctg809□ctg1157□WAG-118E22  
ctg157□ctg809□ctg1157□WAG-120A24  
ctg157□ctg809□ctg1157□WAG-122J1  
ctg157□ctg809□ctg3046□WAG-17A21  
ctg157□ctg809□ctg3046□WAG-34K7  
ctg157□ctg809□ctg3046□WAG-119O20  
ctg157□ctg809□ctg3046□WAG-129H23  
ctg157□ctg809□ctg5326□WAG-105E20  
ctg157□ctg809□ctg5326□WAG-121F19  
ctg1570□□□WAG-1C13  
ctg1570□□□WAG-44H23  
ctg1570□ctg4207□□WAG-127I11  
ctg1570□ctg4207□ctg6624□WAG-24O4  
ctg1570□ctg4207□ctg6624□WAG-90A16  
ctg1571□ctg3704□□WAG-69K1  
ctg1571□ctg3704□ctg4804□WAG-47K17  
ctg1571□ctg3704□ctg4804□WAG-113J5  
ctg1571□ctg3827□ctg4089□WAG-13E2  
ctg1571□ctg3827□ctg4089□WAG-18F17  
ctg1571□ctg3827□ctg4089□WAG-115K1  
ctg1572□□□WAG-12I23  
ctg1572□□□WAG-56L12  
ctg1572□ctg3944□□WAG-12K10  
ctg1572□ctg3944□ctg4221□WAG-24J5  
ctg1572□ctg3944□ctg4221□WAG-68K9  
ctg1572□ctg3944□ctg4221□WAG-69L3  
ctg1573□□□WAG-74F4  
ctg1573□ctg3589□□WAG-96J19  
ctg1573□ctg3589□□WAG-99A11  
ctg1573□ctg3589□□WAG-103B20  
ctg1573□ctg3589□□WAG-106M12  
ctg1573□ctg3589□ctg4848□WAG-78P9  
ctg1573□ctg3589□ctg4848□WAG-105E11  
ctg1574□□□WAG-37F8  
ctg1574□□□WAG-50E8  
ctg1574□□□WAG-92L3  
ctg1574□ctg3003□ctg2992□WAG-78I7  
ctg1574□ctg3003□ctg2992□WAG-118J14  
ctg1574□ctg3003□ctg2992□WAG-123E18  
ctg1575□ctg3004□□WAG-55M11  
ctg1575□ctg3004□ctg2993□WAG-12P4  
ctg1575□ctg3004□ctg2993□WAG-68G15  
ctg1575□ctg3004□ctg2993□WAG-124A11  
ctg1576□ctg3007□ctg2996□WAG-22F11  
ctg1576□ctg3007□ctg2996□WAG-23I6  
ctg1576□ctg3007□ctg2996□WAG-106J3  
ctg1577□ctg3008□ctg2998□WAG-109N4  
ctg1577□ctg3008□ctg2998□WAG-114K11  
ctg1577□ctg3008□ctg2998□WAG-119M22



ctg1578□□□WAG-80G21  
ctg1578□□□WAG-90D11  
ctg1578□ctg3012□□WAG-69H14  
ctg1578□ctg3012□ctg3929□WAG-103P20  
ctg1578□ctg3012□ctg3929□WAG-112N17  
ctg1578□ctg3012□ctg3929□WAG-118P14  
ctg1579□□□WAG-101O17  
ctg1579□ctg3601□ctg3777□WAG-36H10  
ctg1579□ctg3601□ctg3777□WAG-113H7  
ctg1579□ctg3601□ctg3777□WAG-123M6  
ctg158□□□WAG-89B22  
ctg158□ctg642□ctg1791□WAG-35E17  
ctg158□ctg642□ctg1791□WAG-52I16  
ctg158□ctg642□ctg1791□WAG-76I5  
ctg158□ctg642□ctg1791□WAG-112E23  
ctg158□ctg642□ctg1791□WAG-113M3  
ctg158□ctg642□ctg4863□WAG-48K6  
ctg158□ctg642□ctg4863□WAG-53O21  
ctg158□ctg642□ctg576□WAG-9G14  
ctg158□ctg642□ctg576□WAG-17B19  
ctg158□ctg642□ctg576□WAG-68K7  
ctg158□ctg642□ctg576□WAG-124B9  
ctg1580□□□WAG-28G8  
ctg1580□□□WAG-93E10  
ctg1580□ctg3015□ctg3003□WAG-52O9  
ctg1580□ctg3015□ctg3003□WAG-122I21  
ctg1580□ctg5298□ctg6141□WAG-42O24  
ctg1580□ctg5298□ctg6141□WAG-44H21  
ctg1580□ctg6131□□WAG-83D7  
ctg1580□ctg6131□□WAG-90H6  
ctg1581□ctg3016□ctg3006□WAG-22D17  
ctg1581□ctg3016□ctg3006□WAG-58O8  
ctg1581□ctg5394□ctg6372□WAG-80D19  
ctg1581□ctg5394□ctg6372□WAG-107E6  
ctg1582□□□WAG-4A18  
ctg1582□□□WAG-37H24  
ctg1582□□□WAG-45N12  
ctg1582□□□WAG-59K7  
ctg1582□ctg4100□□WAG-128H3  
ctg1582□ctg4100□ctg6224□WAG-17I2  
ctg1582□ctg4100□ctg6224□WAG-52P18  
ctg1582□ctg4488□□WAG-111C19  
ctg1582□ctg4488□□WAG-113D22  
ctg1582□ctg4488□□WAG-118P10  
ctg1582□ctg4753□ctg4956□WAG-87A19  
ctg1582□ctg4753□ctg4956□WAG-111D20  
ctg1582□ctg5699□□WAG-56B5  
ctg1582□ctg5699□□WAG-103I24  
ctg1583□□□WAG-22B20  
ctg1583□□□WAG-79E12  
ctg1583□□□WAG-106L10  
ctg1583□ctg4237□□WAG-5N14  
ctg1583□ctg4237□□WAG-68H16  
ctg1583□ctg4237□ctg6128□WAG-7A4  
ctg1583□ctg4237□ctg6128□WAG-78A14  
ctg1583□ctg5550□ctg6687□WAG-89G8

ctg1583□ctg5550□ctg6687□WAG-119B4  
ctg1584□ctg3020□ctg3020□WAG-28G13  
ctg1584□ctg3020□ctg3020□WAG-109B24  
ctg1584□ctg3020□ctg3020□WAG-121A13  
ctg1584□ctg3020□ctg3020□WAG-125M17  
ctg1585□□□WAG-116L21  
ctg1585□ctg4412□□WAG-8A2  
ctg1585□ctg4412□□WAG-47B15  
ctg1585□ctg4412□□WAG-66L3  
ctg1585□ctg6172□□WAG-8O13  
ctg1585□ctg6172□□WAG-124I6  
ctg1586□□□WAG-33K4  
ctg1586□ctg3619□ctg4885□WAG-30N4  
ctg1586□ctg3619□ctg4885□WAG-30N6  
ctg1586□ctg3619□ctg5625□WAG-54N7  
ctg1586□ctg3619□ctg5625□WAG-62M1  
ctg1586□ctg3705□□WAG-23N11  
ctg1586□ctg3705□ctg4835□WAG-102G4  
ctg1586□ctg3705□ctg4835□WAG-115F20  
ctg1587□ctg3024□ctg3024□WAG-45A20  
ctg1587□ctg3024□ctg3024□WAG-80M14  
ctg1587□ctg3024□ctg3024□WAG-119I8  
ctg1588□ctg3028□□WAG-6B16  
ctg1588□ctg3028□ctg3955□WAG-43C9  
ctg1588□ctg3028□ctg3955□WAG-91E9  
ctg1588□ctg3028□ctg3955□WAG-106E8  
ctg1589□□□WAG-29P18  
ctg1589□ctg3580□□WAG-54O14  
ctg1589□ctg3580□ctg4647□WAG-70P21  
ctg1589□ctg3580□ctg4647□WAG-84P13  
ctg1589□ctg4540□ctg4681□WAG-72H22  
ctg1589□ctg4540□ctg4681□WAG-79A16  
ctg159□□□WAG-2O4  
ctg159□□□WAG-4I3  
ctg159□□□WAG-11B11  
ctg159□□□WAG-17C16  
ctg159□□□WAG-92I24  
ctg159□□□WAG-96A17  
ctg159□ctg2350□ctg3451□WAG-5O10  
ctg159□ctg2350□ctg3451□WAG-16G1  
ctg159□ctg2350□ctg3451□WAG-49D19  
ctg159□ctg2350□ctg3451□WAG-112M14  
ctg159□ctg2350□ctg3451□WAG-120N20  
ctg159□ctg2350□ctg3451□WAG-126G21  
ctg159□ctg3323□ctg3388□WAG-44N4  
ctg159□ctg3323□ctg3388□WAG-86G21  
ctg159□ctg3323□ctg3388□WAG-110I24  
ctg159□ctg3366□ctg3437□WAG-28H12  
ctg159□ctg3366□ctg3437□WAG-75A7  
ctg159□ctg3366□ctg3437□WAG-85A21  
ctg159□ctg3366□ctg3437□WAG-87N22  
ctg159□ctg3366□ctg3437□WAG-112J6  
ctg159□ctg3674□ctg3865□WAG-18D10  
ctg159□ctg3674□ctg3865□WAG-29J18  
ctg159□ctg3674□ctg3865□WAG-51G1  
ctg159□ctg563□□WAG-115I21

ctg159□ctg563□ctg1059□WAG-29N16  
ctg159□ctg563□ctg1059□WAG-34I9  
ctg159□ctg563□ctg1059□WAG-47B5  
ctg159□ctg563□ctg1059□WAG-57G13  
ctg159□ctg563□ctg1059□WAG-60G24  
ctg159□ctg563□ctg1059□WAG-64G20  
ctg159□ctg563□ctg1059□WAG-71C20  
ctg159□ctg563□ctg1059□WAG-107K24  
ctg159□ctg563□ctg2375□WAG-2C11  
ctg159□ctg563□ctg2375□WAG-20E21  
ctg159□ctg563□ctg2375□WAG-55E5  
ctg159□ctg563□ctg2375□WAG-63M18  
ctg159□ctg563□ctg2375□WAG-83L12  
ctg159□ctg563□ctg2375□WAG-125C8  
ctg1590□□□WAG-62B24  
ctg1590□ctg3519□□WAG-21C1  
ctg1590□ctg3519□ctg4276□WAG-47J20  
ctg1590□ctg3519□ctg4276□WAG-93M10  
ctg1590□ctg3519□ctg4276□WAG-98D14  
ctg1591□ctg3642□ctg3833□WAG-15L6  
ctg1591□ctg3642□ctg3833□WAG-15L14  
ctg1591□ctg5081□ctg5640□WAG-7C9  
ctg1591□ctg5081□ctg5640□WAG-83C11  
ctg1592□ctg3035□ctg3031□WAG-1G23  
ctg1592□ctg3035□ctg3031□WAG-21O7  
ctg1592□ctg3035□ctg3031□WAG-87H8  
ctg1593□□□WAG-113H18  
ctg1593□ctg3521□ctg3659□WAG-25P12  
ctg1593□ctg3521□ctg3659□WAG-88N16  
ctg1593□ctg3521□ctg3659□WAG-109B18  
ctg1594□□□WAG-27J12  
ctg1594□□□WAG-43L7  
ctg1594□□□WAG-88O14  
ctg1594□ctg3042□ctg3038□WAG-41B6  
ctg1594□ctg3042□ctg3038□WAG-69O24  
ctg1594□ctg3042□ctg3038□WAG-83L5  
ctg1594□ctg3042□ctg3038□WAG-91D3  
ctg1594□ctg5455□ctg6508□WAG-32E1  
ctg1594□ctg5455□ctg6508□WAG-82I21  
ctg1595□□□WAG-6E20  
ctg1595□ctg3644□□WAG-16J1  
ctg1595□ctg3644□□WAG-42P24  
ctg1595□ctg3644□□WAG-52F6  
ctg1595□ctg3644□□WAG-67H3  
ctg1595□ctg3644□□WAG-107A11  
ctg1595□ctg3644□□WAG-114D1  
ctg1596□ctg3043□ctg5588□WAG-27M15  
ctg1596□ctg3043□ctg5588□WAG-105H13  
ctg1596□ctg3043□ctg6145□WAG-21G15  
ctg1596□ctg3043□ctg6145□WAG-118I3  
ctg1597□□□WAG-31D15  
ctg1597□□□WAG-43G2  
ctg1597□□□WAG-122K23  
ctg1597□ctg4828□ctg5102□WAG-39F23  
ctg1597□ctg4828□ctg5102□WAG-77N5  
ctg1598□□□WAG-9G20

ctg1598□ctg3047□ctg3803□WAG-69B7  
ctg1598□ctg3047□ctg3803□WAG-97E12  
ctg1598□ctg3047□ctg3803□WAG-104H5  
ctg1598□ctg3047□ctg3803□WAG-118C9  
ctg1599□ctg3048□ctg4154□WAG-10L2  
ctg1599□ctg3048□ctg4154□WAG-42A6  
ctg1599□ctg3048□ctg4154□WAG-59P8  
ctg1599□ctg3048□ctg4154□WAG-106N9  
ctg16□□□WAG-34E24  
ctg16□□□WAG-53J21  
ctg16□ctg2666□□WAG-74J20  
ctg16□ctg2666□ctg2997□WAG-2P7  
ctg16□ctg2666□ctg2997□WAG-8B5  
ctg16□ctg2666□ctg2997□WAG-64N11  
ctg16□ctg58□ctg60□WAG-4C2  
ctg16□ctg58□ctg60□WAG-22P1  
ctg16□ctg58□ctg60□WAG-51A12  
ctg16□ctg58□ctg60□WAG-51B5  
ctg16□ctg58□ctg60□WAG-55P17  
ctg16□ctg58□ctg60□WAG-56L9  
ctg16□ctg58□ctg60□WAG-56P9  
ctg16□ctg58□ctg60□WAG-77A24  
ctg16□ctg58□ctg60□WAG-78E12  
ctg16□ctg58□ctg60□WAG-87L20  
ctg16□ctg58□ctg60□WAG-88P21  
ctg16□ctg58□ctg60□WAG-89B6  
ctg16□ctg58□ctg60□WAG-92M12  
ctg16□ctg58□ctg60□WAG-107N12  
ctg16□ctg58□ctg60□WAG-113A11  
ctg16□ctg58□ctg60□WAG-121J19  
ctg16□ctg58□ctg60□WAG-129O9  
ctg160□ctg550□□WAG-16D15  
ctg160□ctg550□ctg975□WAG-27H15  
ctg160□ctg550□ctg975□WAG-32N13  
ctg160□ctg550□ctg975□WAG-44B24  
ctg160□ctg550□ctg975□WAG-79L5  
ctg160□ctg550□ctg975□WAG-98C14  
ctg160□ctg550□ctg975□WAG-102M19  
ctg160□ctg550□ctg975□WAG-123E15  
ctg160□ctg550□ctg975□WAG-127P9  
ctg1600□ctg3319□ctg4465□WAG-17K16  
ctg1600□ctg3319□ctg4465□WAG-105G4  
ctg1600□ctg3319□ctg4950□WAG-126A19  
ctg1600□ctg3319□ctg4950□WAG-129H16  
ctg1601□ctg3049□ctg5205□WAG-92A9  
ctg1601□ctg3049□ctg5205□WAG-130C17  
ctg1601□ctg3049□ctg5293□WAG-78C18  
ctg1601□ctg3049□ctg5293□WAG-130P16  
ctg1601□ctg3049□ctg5535□WAG-20A6  
ctg1601□ctg3049□ctg5535□WAG-123G23  
ctg1602□ctg3947□□WAG-61O13  
ctg1602□ctg3947□ctg5376□WAG-61N13  
ctg1602□ctg3947□ctg5376□WAG-128A9  
ctg1602□ctg5356□ctg6290□WAG-11P12  
ctg1602□ctg5356□ctg6290□WAG-82I17  
ctg1603□ctg3057□ctg3057□WAG-38J18

ctg1603□ctg3057□ctg3057□WAG-49N6  
ctg1603□ctg3057□ctg3057□WAG-80K6  
ctg1604□□□WAG-97C6  
ctg1604□ctg3710□□WAG-55G9  
ctg1604□ctg3710□ctg3920□WAG-8D8  
ctg1604□ctg3710□ctg3920□WAG-127I18  
ctg1604□ctg3710□ctg3920□WAG-130J9  
ctg1605□□□WAG-109J6  
ctg1605□□□WAG-124L6  
ctg1605□ctg3658□□WAG-53D6  
ctg1605□ctg3658□ctg4708□WAG-86D8  
ctg1605□ctg3658□ctg4708□WAG-112P2  
ctg1606□ctg3659□ctg4674□WAG-47G15  
ctg1606□ctg3659□ctg4674□WAG-98K19  
ctg1606□ctg3659□ctg5435□WAG-117J11  
ctg1606□ctg3659□ctg5435□WAG-118P15  
ctg1607□ctg3059□ctg3083□WAG-83K20  
ctg1607□ctg3059□ctg3083□WAG-94M13  
ctg1607□ctg3059□ctg3083□WAG-105E12  
ctg1607□ctg3059□ctg3083□WAG-121L12  
ctg1608□□□WAG-99I21  
ctg1608□ctg4456□□WAG-14J15  
ctg1608□ctg4456□□WAG-54F8  
ctg1608□ctg4456□□WAG-130M14  
ctg1608□ctg4461□□WAG-92I2  
ctg1608□ctg4461□ctg6466□WAG-86B7  
ctg1608□ctg4461□ctg6466□WAG-116D20  
ctg1608□ctg5549□ctg6686□WAG-18A1  
ctg1608□ctg5549□ctg6686□WAG-90B12  
ctg1609□ctg3060□□WAG-2N2  
ctg1609□ctg3060□ctg4020□WAG-27I8  
ctg1609□ctg3060□ctg4020□WAG-62A10  
ctg1609□ctg3060□ctg4020□WAG-73N21  
ctg161□ctg534□□WAG-14P8  
ctg161□ctg534□ctg587□WAG-19E10  
ctg161□ctg534□ctg587□WAG-27D24  
ctg161□ctg534□ctg587□WAG-56F1  
ctg161□ctg534□ctg587□WAG-73B8  
ctg161□ctg534□ctg587□WAG-87K1  
ctg161□ctg534□ctg587□WAG-106A22  
ctg161□ctg534□ctg587□WAG-120L10  
ctg1610□ctg3062□□WAG-4J16  
ctg1610□ctg3062□□WAG-115F24  
ctg1610□ctg3062□ctg5013□WAG-50H17  
ctg1610□ctg3062□ctg5013□WAG-79D6  
ctg1611□□□WAG-18I21  
ctg1611□□□WAG-98D11  
ctg1611□□□WAG-117O7  
ctg1611□ctg3542□ctg3687□WAG-3N2  
ctg1611□ctg3542□ctg3687□WAG-121F12  
ctg1611□ctg3542□ctg3687□WAG-126B18  
ctg1611□ctg5267□ctg6083□WAG-43O18  
ctg1611□ctg5267□ctg6083□WAG-45M8  
ctg1612□□□WAG-104N13  
ctg1612□ctg3546□ctg3696□WAG-35A14  
ctg1612□ctg3546□ctg3696□WAG-44J6

ctg1612□ctg3546□ctg3696□WAG-76G13  
ctg1613□ctg4159□□WAG-74G16  
ctg1613□ctg4159□ctg5951□WAG-51C23  
ctg1613□ctg4159□ctg5951□WAG-119E6  
ctg1613□ctg5879□□WAG-14G2  
ctg1613□ctg5879□□WAG-117D7  
ctg1614□□□WAG-79B4  
ctg1614□ctg4293□□WAG-72M12  
ctg1614□ctg4293□ctg6263□WAG-47A21  
ctg1614□ctg4293□ctg6263□WAG-85L6  
ctg1614□ctg4324□□WAG-60K15  
ctg1614□ctg4324□□WAG-81C17  
ctg1614□ctg4324□□WAG-81P6  
ctg1614□ctg4324□□WAG-107L22  
ctg1615□□□WAG-1P1  
ctg1615□ctg3064□ctg3065□WAG-29L9  
ctg1615□ctg3064□ctg3065□WAG-57P5  
ctg1615□ctg3064□ctg3065□WAG-64B23  
ctg1616□ctg3284□ctg3336□WAG-6G3  
ctg1616□ctg3284□ctg3336□WAG-32D2  
ctg1616□ctg3284□ctg3336□WAG-33L23  
ctg1616□ctg3584□ctg3755□WAG-38G13  
ctg1616□ctg3584□ctg3755□WAG-65E11  
ctg1616□ctg3584□ctg3755□WAG-104E16  
ctg1617□ctg3069□ctg3071□WAG-82L16  
ctg1617□ctg3069□ctg3071□WAG-114P23  
ctg1617□ctg3069□ctg3071□WAG-119K6  
ctg1618□ctg4227□□WAG-86I2  
ctg1618□ctg4227□ctg6675□WAG-103E23  
ctg1618□ctg4227□ctg6675□WAG-115F5  
ctg1618□ctg4336□ctg4520□WAG-40C4  
ctg1618□ctg4336□ctg4520□WAG-88N1  
ctg1619□ctg3784□ctg4035□WAG-50J17  
ctg1619□ctg3784□ctg4035□WAG-81L1  
ctg1619□ctg3784□ctg4035□WAG-99B19  
ctg1619□ctg3784□ctg6824□WAG-114G10  
ctg1619□ctg3784□ctg6824□WAG-123E4  
ctg162□□□WAG-79E10  
ctg162□ctg2445□□WAG-108B1  
ctg162□ctg2445□ctg2356□WAG-19G19  
ctg162□ctg2445□ctg2356□WAG-20J5  
ctg162□ctg2445□ctg2356□WAG-58E20  
ctg162□ctg2445□ctg3855□WAG-32H10  
ctg162□ctg2445□ctg3855□WAG-47E1  
ctg162□ctg2445□ctg3855□WAG-79F23  
ctg162□ctg2445□ctg3855□WAG-129A9  
ctg162□ctg652□□WAG-3A1  
ctg162□ctg652□□WAG-47K18  
ctg162□ctg652□□WAG-74C24  
ctg162□ctg652□□WAG-124I5  
ctg162□ctg652□ctg699□WAG-11A3  
ctg162□ctg652□ctg699□WAG-12L14  
ctg162□ctg652□ctg699□WAG-34D1  
ctg162□ctg652□ctg699□WAG-42A23  
ctg162□ctg652□ctg699□WAG-43M23  
ctg162□ctg652□ctg699□WAG-62L9

ctg162□ctg652□ctg699□WAG-63E13  
ctg162□ctg652□ctg699□WAG-67F15  
ctg1620□ctg3078□ctg3079□WAG-10C12  
ctg1620□ctg3078□ctg3079□WAG-61B20  
ctg1620□ctg3078□ctg3079□WAG-67J22  
ctg1620□ctg3078□ctg3079□WAG-69K7  
ctg1621□□□WAG-41E10  
ctg1621□□□WAG-41H10  
ctg1621□□□WAG-52O16  
ctg1621□ctg3643□□WAG-42L18  
ctg1621□ctg3643□□WAG-117C3  
ctg1621□ctg3643□□WAG-117I13  
ctg1621□ctg3643□ctg6886□WAG-41N2  
ctg1621□ctg3643□ctg6886□WAG-41O16  
ctg1621□ctg3681□ctg5031□WAG-86C3  
ctg1621□ctg3681□ctg5031□WAG-130E3  
ctg1621□ctg3681□ctg5486□WAG-24L2  
ctg1621□ctg3681□ctg5486□WAG-128A22  
ctg1622□ctg3570□ctg4832□WAG-3M23  
ctg1622□ctg3570□ctg4832□WAG-3N20  
ctg1622□ctg3570□ctg5478□WAG-1D2  
ctg1622□ctg3570□ctg5478□WAG-117B3  
ctg1623□ctg3079□ctg3080□WAG-6B21  
ctg1623□ctg3079□ctg3080□WAG-13N5  
ctg1623□ctg3079□ctg3080□WAG-86P21  
ctg1624□ctg3081□□WAG-89M11  
ctg1624□ctg3081□ctg4052□WAG-105J18  
ctg1624□ctg3081□ctg4052□WAG-124H11  
ctg1625□ctg3082□ctg4055□WAG-42M18  
ctg1625□ctg3082□ctg4055□WAG-44E1  
ctg1625□ctg3082□ctg4055□WAG-84J3  
ctg1626□ctg3086□ctg3082□WAG-126F8  
ctg1626□ctg3086□ctg3082□WAG-126J21  
ctg1626□ctg3086□ctg3082□WAG-129G5  
ctg1627□ctg3089□□WAG-23A7  
ctg1627□ctg3089□ctg4060□WAG-31G21  
ctg1627□ctg3089□ctg4060□WAG-63O19  
ctg1627□ctg3089□ctg4060□WAG-91D2  
ctg1628□ctg3090□□WAG-3A21  
ctg1628□ctg3090□ctg4212□WAG-22N5  
ctg1628□ctg3090□ctg4212□WAG-74O13  
ctg1628□ctg3090□ctg4212□WAG-94F13  
ctg1629□□□WAG-103E13  
ctg1629□ctg3688□□WAG-34K23  
ctg1629□ctg3688□□WAG-56L15  
ctg1629□ctg3688□□WAG-87L16  
ctg1629□ctg3688□ctg3889□WAG-102H20  
ctg1629□ctg3688□ctg3889□WAG-120I12  
ctg1629□ctg3688□ctg3889□WAG-127D19  
ctg163□ctg1596□□WAG-93G11  
ctg163□ctg1596□ctg1444□WAG-21F11  
ctg163□ctg1596□ctg1444□WAG-95G23  
ctg163□ctg1596□ctg1444□WAG-108J6  
ctg163□ctg1596□ctg1444□WAG-118G15  
ctg163□ctg646□ctg668□WAG-39N19  
ctg163□ctg646□ctg668□WAG-56D24

ctg163□ctg646□ctg668□WAG-66A9  
ctg163□ctg646□ctg668□WAG-71H17  
ctg163□ctg646□ctg668□WAG-85F6  
ctg163□ctg646□ctg668□WAG-99H19  
ctg163□ctg646□ctg668□WAG-112G21  
ctg163□ctg646□ctg668□WAG-117P24  
ctg1630□□□WAG-3O2  
ctg1630□ctg3092□□WAG-9I13  
ctg1630□ctg3092□□WAG-39L2  
ctg1630□ctg3092□ctg3940□WAG-58D18  
ctg1630□ctg3092□ctg3940□WAG-60K8  
ctg1630□ctg3092□ctg3940□WAG-71H7  
ctg1630□ctg4283□□WAG-124L2  
ctg1630□ctg4283□ctg6810□WAG-32B2  
ctg1630□ctg4283□ctg6810□WAG-123N13  
ctg1631□□□WAG-39B14  
ctg1631□□□WAG-39K18  
ctg1631□ctg4196□ctg4422□WAG-8G12  
ctg1631□ctg4196□ctg4422□WAG-114A4  
ctg1631□ctg6006□□WAG-57F11  
ctg1631□ctg6006□□WAG-76A14  
ctg1632□□□WAG-34G3  
ctg1632□ctg3093□□WAG-14O19  
ctg1632□ctg3093□□WAG-19C13  
ctg1632□ctg3093□ctg4083□WAG-26L23  
ctg1632□ctg3093□ctg4083□WAG-35G11  
ctg1632□ctg3093□ctg4083□WAG-83J10  
ctg1632□ctg3093□ctg4083□WAG-97O4  
ctg1633□□□WAG-3B24  
ctg1633□□□WAG-20C22  
ctg1633□□□WAG-64L1  
ctg1633□ctg4206□□WAG-19C15  
ctg1633□ctg4206□□WAG-107I23  
ctg1633□ctg4206□ctg6620□WAG-89M10  
ctg1633□ctg4206□ctg6620□WAG-98N21  
ctg1634□□□WAG-92N15  
ctg1634□ctg3829□□WAG-25C23  
ctg1634□ctg3829□ctg5081□WAG-13I9  
ctg1634□ctg3829□ctg5081□WAG-121P11  
ctg1634□ctg4364□□WAG-59O1  
ctg1634□ctg4364□□WAG-70P7  
ctg1634□ctg4364□□WAG-91F3  
ctg1634□ctg4364□□WAG-113P20  
ctg1635□ctg3097□ctg3096□WAG-49C2  
ctg1635□ctg3097□ctg3096□WAG-67C22  
ctg1635□ctg3097□ctg3096□WAG-79J17  
ctg1636□ctg3100□ctg3099□WAG-18K18  
ctg1636□ctg3100□ctg3099□WAG-57I24  
ctg1636□ctg3100□ctg3099□WAG-107M2  
ctg1636□ctg3100□ctg3099□WAG-110N24  
ctg1637□ctg3598□□WAG-86A22  
ctg1637□ctg3598□ctg4684□WAG-43L13  
ctg1637□ctg3598□ctg4684□WAG-60J16  
ctg1637□ctg4233□□WAG-24M2  
ctg1637□ctg4233□ctg6717□WAG-8M7  
ctg1637□ctg4233□ctg6717□WAG-22D16



ctg1638□□□WAG-81I23  
ctg1638□ctg3103□□WAG-25F8  
ctg1638□ctg3103□□WAG-58C18  
ctg1638□ctg3103□□WAG-66B12  
ctg1638□ctg3103□ctg3736□WAG-12A14  
ctg1638□ctg3103□ctg3736□WAG-57E18  
ctg1638□ctg3103□ctg3736□WAG-117H2  
ctg1638□ctg3747□ctg5195□WAG-44H11  
ctg1638□ctg3747□ctg5195□WAG-45I5  
ctg1638□ctg3747□ctg5631□WAG-116A17  
ctg1638□ctg3747□ctg5631□WAG-129I22  
ctg1639□□□WAG-46I2  
ctg1639□ctg3942□□WAG-107J3  
ctg1639□ctg3942□ctg4214□WAG-75O11  
ctg1639□ctg3942□ctg4214□WAG-96H9  
ctg1639□ctg3942□ctg4214□WAG-98N8  
ctg164□ctg3721□ctg4841□WAG-29G15  
ctg164□ctg3721□ctg4841□WAG-49O12  
ctg164□ctg3721□ctg5356□WAG-59A12  
ctg164□ctg3721□ctg5356□WAG-64B19  
ctg164□ctg466□□WAG-28B5  
ctg164□ctg466□□WAG-54P10  
ctg164□ctg466□□WAG-63N4  
ctg164□ctg466□ctg1463□WAG-10O4  
ctg164□ctg466□ctg1463□WAG-11M13  
ctg164□ctg466□ctg1463□WAG-20H2  
ctg164□ctg466□ctg1463□WAG-57H16  
ctg164□ctg466□ctg1463□WAG-61C2  
ctg164□ctg466□ctg1463□WAG-63B12  
ctg164□ctg466□ctg1463□WAG-101K9  
ctg164□ctg466□ctg1463□WAG-115H19  
ctg164□ctg466□ctg1463□WAG-124E19  
ctg164□ctg466□ctg1463□WAG-126B3  
ctg164□ctg466□ctg3121□WAG-72F13  
ctg164□ctg466□ctg3121□WAG-75B20  
ctg164□ctg466□ctg3121□WAG-109J5  
ctg164□ctg466□ctg3826□WAG-25A6  
ctg164□ctg466□ctg3826□WAG-46C8  
ctg164□ctg466□ctg3826□WAG-72I18  
ctg164□ctg466□ctg6253□WAG-20F17  
ctg164□ctg466□ctg6253□WAG-103L17  
ctg1640□ctg3110□ctg3112□WAG-47E22  
ctg1640□ctg3110□ctg3112□WAG-64A2  
ctg1640□ctg3110□ctg3112□WAG-120E6  
ctg1641□ctg3112□□WAG-37I17  
ctg1641□ctg3112□□WAG-119L23  
ctg1641□ctg3112□ctg4091□WAG-103P10  
ctg1641□ctg3112□ctg4091□WAG-125G22  
ctg1642□ctg3113□□WAG-19K19  
ctg1642□ctg3113□ctg4071□WAG-57G12  
ctg1642□ctg3113□ctg4071□WAG-94K3  
ctg1643□ctg3394□□WAG-79B1  
ctg1643□ctg3394□ctg3488□WAG-12O6  
ctg1643□ctg3394□ctg3488□WAG-93F8  
ctg1643□ctg3394□ctg3488□WAG-96M20  
ctg1644□□□WAG-63P19

ctg1644□ctg4240□□WAG-54M1  
ctg1644□ctg4240□ctg6162□WAG-71H12  
ctg1644□ctg4240□ctg6162□WAG-117D10  
ctg1644□ctg4406□□WAG-80H18  
ctg1644□ctg4406□□WAG-108A8  
ctg1644□ctg4406□□WAG-130F8  
ctg1645□ctg3123□□WAG-86G5  
ctg1645□ctg3123□□WAG-88E16  
ctg1645□ctg3123□□WAG-95E17  
ctg1645□ctg3123□ctg5244□WAG-79L8  
ctg1645□ctg3123□ctg5244□WAG-89F20  
ctg1646□ctg3635□ctg4913□WAG-66F23  
ctg1646□ctg3635□ctg4913□WAG-128K10  
ctg1646□ctg3635□ctg5139□WAG-45B13  
ctg1646□ctg3635□ctg5139□WAG-64G18  
ctg1647□ctg3126□ctg3132□WAG-42B20  
ctg1647□ctg3126□ctg3132□WAG-89I21  
ctg1647□ctg3126□ctg3132□WAG-93F3  
ctg1647□ctg3126□ctg3132□WAG-107A21  
ctg1648□□□WAG-64J1  
ctg1648□□□WAG-75J7  
ctg1648□ctg3725□□WAG-90K9  
ctg1648□ctg3725□ctg4877□WAG-70E8  
ctg1648□ctg3725□ctg4877□WAG-101M12  
ctg1649□ctg3128□□WAG-95A12  
ctg1649□ctg3128□ctg4252□WAG-9L9  
ctg1649□ctg3128□ctg4252□WAG-64C22  
ctg165□□□WAG-17J7  
ctg165□□□WAG-129I3  
ctg165□ctg1353□□WAG-123K13  
ctg165□ctg1353□ctg1578□WAG-1J23  
ctg165□ctg1353□ctg1578□WAG-7K23  
ctg165□ctg1353□ctg1578□WAG-37B14  
ctg165□ctg1353□ctg1578□WAG-48M9  
ctg165□ctg1353□ctg1578□WAG-94L15  
ctg165□ctg1353□ctg1578□WAG-114G16  
ctg165□ctg1353□ctg1578□WAG-114I18  
ctg165□ctg1353□ctg1578□WAG-114L5  
ctg165□ctg827□□WAG-26P10  
ctg165□ctg827□ctg1048□WAG-50M12  
ctg165□ctg827□ctg1048□WAG-62O13  
ctg165□ctg827□ctg1048□WAG-68J21  
ctg165□ctg827□ctg1048□WAG-72E2  
ctg165□ctg827□ctg1048□WAG-75M6  
ctg165□ctg827□ctg1048□WAG-79A20  
ctg165□ctg827□ctg1048□WAG-110E10  
ctg165□ctg827□ctg4664□WAG-107G13  
ctg165□ctg827□ctg4664□WAG-123D17  
ctg165□ctg827□ctg5874□WAG-10K10  
ctg165□ctg827□ctg5874□WAG-54H9  
ctg165□ctg827□ctg6316□WAG-13N13  
ctg165□ctg827□ctg6316□WAG-82K23  
ctg1650□ctg3129□□WAG-10J4  
ctg1650□ctg3129□□WAG-63K9  
ctg1650□ctg3129□□WAG-116L18  
ctg1650□ctg3129□ctg4254□WAG-9J22

ctg1650□ctg3129□ctg4254□WAG-40F16  
ctg1650□ctg3129□ctg4254□WAG-127G7  
ctg1651□□□WAG-27C23  
ctg1651□ctg4054□□WAG-24C11  
ctg1651□ctg4054□ctg6059□WAG-19D16  
ctg1651□ctg4054□ctg6059□WAG-50O7  
ctg1651□ctg4558□ctg4696□WAG-67L20  
ctg1651□ctg4558□ctg4696□WAG-128C14  
ctg1651□ctg4589□ctg4753□WAG-54N22  
ctg1651□ctg4589□ctg4753□WAG-78H14  
ctg1651□ctg5486□ctg6575□WAG-44M24  
ctg1651□ctg5486□ctg6575□WAG-61E6  
ctg1652□□□WAG-62N17  
ctg1652□□□WAG-127G16  
ctg1652□ctg3728□ctg3951□WAG-37E19  
ctg1652□ctg3728□ctg3951□WAG-51K9  
ctg1652□ctg3728□ctg3951□WAG-56C23  
ctg1652□ctg3728□ctg3951□WAG-66K21  
ctg1653□□□WAG-5O4  
ctg1653□ctg3154□ctg3170□WAG-38A17  
ctg1653□ctg3154□ctg3170□WAG-42O6  
ctg1653□ctg3154□ctg3170□WAG-55C4  
ctg1654□□□WAG-13O11  
ctg1654□ctg3134□□WAG-104D14  
ctg1654□ctg3134□ctg3142□WAG-11C18  
ctg1654□ctg3134□ctg3142□WAG-76N3  
ctg1654□ctg3134□ctg3142□WAG-87E5  
ctg1655□ctg3641□ctg3831□WAG-5G1  
ctg1655□ctg3641□ctg3831□WAG-49P20  
ctg1655□ctg3641□ctg3831□WAG-52M22  
ctg1655□ctg4731□ctg4924□WAG-36O1  
ctg1655□ctg4731□ctg4924□WAG-82O21  
ctg1656□□□WAG-122K11  
ctg1656□ctg3316□□WAG-54I7  
ctg1656□ctg3316□□WAG-78D17  
ctg1656□ctg3316□□WAG-100E14  
ctg1656□ctg3316□ctg6287□WAG-24I2  
ctg1656□ctg3316□ctg6287□WAG-116O2  
ctg1657□□□WAG-115M10  
ctg1657□ctg3739□ctg3970□WAG-88C12  
ctg1657□ctg3739□ctg3970□WAG-119L11  
ctg1657□ctg3739□ctg3970□WAG-120L9  
ctg1658□□□WAG-62F1  
ctg1658□□□WAG-77I8  
ctg1658□□□WAG-97P18  
ctg1658□ctg4436□□WAG-73P10  
ctg1658□ctg4436□□WAG-85O8  
ctg1658□ctg4436□□WAG-127N8  
ctg1659□□□WAG-58L13  
ctg1659□□□WAG-83H23  
ctg1659□□□WAG-102D16  
ctg1659□ctg3245□□WAG-9F15  
ctg1659□ctg3245□□WAG-115A12  
ctg1659□ctg3245□ctg6497□WAG-22C1  
ctg1659□ctg3245□ctg6497□WAG-49N24  
ctg1659□ctg5146□ctg5800□WAG-63M6

ctg1659□ctg5146□ctg5800□WAG-76G19  
ctg1659□ctg5204□ctg5930□WAG-43K19  
ctg1659□ctg5204□ctg5930□WAG-70L16  
ctg166□□□WAG-36K24  
ctg166□ctg541□□WAG-82K4  
ctg166□ctg541□ctg572□WAG-58K9  
ctg166□ctg541□ctg572□WAG-63I5  
ctg166□ctg541□ctg572□WAG-88E3  
ctg166□ctg541□ctg572□WAG-125N22  
ctg1660□□□WAG-21I21  
ctg1660□□□WAG-99J23  
ctg1660□ctg6107□□WAG-10A5  
ctg1660□ctg6107□□WAG-13M16  
ctg1660□ctg6420□□WAG-29M14  
ctg1660□ctg6420□□WAG-119A20  
ctg1661□ctg4337□ctg4521□WAG-17F1  
ctg1661□ctg4337□ctg4521□WAG-86L3  
ctg1661□ctg4337□ctg4521□WAG-126M19  
ctg1661□ctg4440□□WAG-30I21  
ctg1661□ctg4440□□WAG-81F9  
ctg1661□ctg4440□ctg4595□WAG-56M4  
ctg1661□ctg4440□ctg4595□WAG-86L5  
ctg1661□ctg6104□□WAG-14O13  
ctg1661□ctg6104□□WAG-86H3  
ctg1661□ctg6515□□WAG-65D15  
ctg1661□ctg6515□□WAG-74D21  
ctg1662□□□WAG-22P24  
ctg1662□ctg3653□□WAG-100B21  
ctg1662□ctg3653□ctg4962□WAG-4K6  
ctg1662□ctg3653□ctg4962□WAG-93L19  
ctg1663□ctg3140□ctg3150□WAG-32B17  
ctg1663□ctg3140□ctg3150□WAG-84M1  
ctg1663□ctg3140□ctg3150□WAG-105C11  
ctg1664□ctg3142□□WAG-8F5  
ctg1664□ctg3142□□WAG-36F8  
ctg1664□ctg3142□ctg5092□WAG-50P6  
ctg1664□ctg3142□ctg5092□WAG-112I19  
ctg1664□ctg3142□ctg5778□WAG-13A24  
ctg1664□ctg3142□ctg5778□WAG-16O7  
ctg1664□ctg3142□ctg5778□WAG-126I10  
ctg1665□□□WAG-22F5  
ctg1665□□□WAG-24C24  
ctg1665□□□WAG-73P21  
ctg1665□ctg5351□ctg6282□WAG-48G21  
ctg1665□ctg5351□ctg6282□WAG-55I6  
ctg1665□ctg5837□□WAG-5B8  
ctg1665□ctg5837□□WAG-62P22  
ctg1666□ctg3143□□WAG-58N11  
ctg1666□ctg3143□□WAG-62F10  
ctg1666□ctg3143□□WAG-123B16  
ctg1666□ctg3143□ctg5185□WAG-50D11  
ctg1666□ctg3143□ctg5185□WAG-90I24  
ctg1667□□□WAG-7H22  
ctg1667□□□WAG-89J13  
ctg1667□□□WAG-130L2  
ctg1667□ctg3746□□WAG-18D6

ctg1667□ctg3746□□WAG-66O23  
ctg1667□ctg3746□ctg5179□WAG-7F14  
ctg1667□ctg3746□ctg5179□WAG-7N9  
ctg1667□ctg3746□ctg5677□WAG-33C16  
ctg1667□ctg3746□ctg5677□WAG-98G12  
ctg1668□ctg3146□ctg3161□WAG-29I10  
ctg1668□ctg3146□ctg3161□WAG-73L11  
ctg1668□ctg3146□ctg3161□WAG-123E9  
ctg1669□ctg3147□□WAG-94A13  
ctg1669□ctg3147□□WAG-122N6  
ctg1669□ctg3147□ctg5512□WAG-52J15  
ctg1669□ctg3147□ctg5512□WAG-79P18  
ctg167□ctg468□ctg481□WAG-38O5  
ctg167□ctg468□ctg481□WAG-47C7  
ctg167□ctg468□ctg481□WAG-67F21  
ctg167□ctg468□ctg481□WAG-86N16  
ctg167□ctg468□ctg481□WAG-98O24  
ctg167□ctg468□ctg481□WAG-130E6  
ctg1670□□□WAG-89M14  
ctg1670□□□WAG-94N24  
ctg1670□ctg4257□□WAG-9D20  
ctg1670□ctg4257□ctg4513□WAG-86J10  
ctg1670□ctg4257□ctg4513□WAG-112F5  
ctg1670□ctg4257□ctg4513□WAG-116G14  
ctg1670□ctg4656□□WAG-21K15  
ctg1670□ctg4656□□WAG-41K19  
ctg1670□ctg4656□□WAG-105O14  
ctg1671□ctg3764□□WAG-57C7  
ctg1671□ctg3764□ctg4004□WAG-18A5  
ctg1671□ctg3764□ctg4004□WAG-65M6  
ctg1671□ctg3764□ctg4004□WAG-110K8  
ctg1672□□□WAG-14F16  
ctg1672□□□WAG-64L4  
ctg1672□ctg3767□ctg4011□WAG-59E17  
ctg1672□ctg3767□ctg4011□WAG-94A4  
ctg1673□ctg4069□□WAG-45M13  
ctg1673□ctg4069□□WAG-55F20  
ctg1673□ctg4069□□WAG-129J3  
ctg1673□ctg4069□ctg5297□WAG-20D5  
ctg1673□ctg4069□ctg5297□WAG-62P2  
ctg1674□□□WAG-115P20  
ctg1674□ctg3676□□WAG-77P20  
ctg1674□ctg3676□ctg3869□WAG-55I21  
ctg1674□ctg3676□ctg3869□WAG-77F8  
ctg1674□ctg3676□ctg3869□WAG-82O16  
ctg1674□ctg3676□ctg3869□WAG-98N13  
ctg1675□□□WAG-66P6  
ctg1675□ctg4578□□WAG-1P8  
ctg1675□ctg4578□□WAG-19G21  
ctg1675□ctg4578□□WAG-37H5  
ctg1675□ctg4578□□WAG-51M10  
ctg1676□□□WAG-3G6  
ctg1676□ctg3776□ctg4027□WAG-20P2  
ctg1676□ctg3776□ctg4027□WAG-125O9  
ctg1677□ctg3159□□WAG-127L21  
ctg1677□ctg3159□ctg4314□WAG-20K23

ctg1677□ctg3159□ctg4314□WAG-124L23  
ctg1678□ctg3162□□WAG-33C7  
ctg1678□ctg3162□ctg4324□WAG-59J13  
ctg1678□ctg3162□ctg4324□WAG-64O24  
ctg1678□ctg6252□□WAG-45M17  
ctg1678□ctg6252□□WAG-100P7  
ctg1679□□□WAG-23E3  
ctg1679□ctg4353□□WAG-26E13  
ctg1679□ctg4353□□WAG-29E24  
ctg1679□ctg4353□ctg6468□WAG-22K5  
ctg1679□ctg4353□ctg6468□WAG-83P22  
ctg1679□ctg5743□□WAG-23F3  
ctg1679□ctg5743□□WAG-89P3  
ctg168□ctg469□ctg511□WAG-29I7  
ctg168□ctg469□ctg511□WAG-31A19  
ctg168□ctg469□ctg511□WAG-32L7  
ctg168□ctg469□ctg511□WAG-49F21  
ctg168□ctg469□ctg511□WAG-52D14  
ctg168□ctg469□ctg511□WAG-84K18  
ctg168□ctg469□ctg511□WAG-88C14  
ctg168□ctg469□ctg511□WAG-97F4  
ctg1680□ctg4357□ctg4535□WAG-90E23  
ctg1680□ctg4357□ctg4535□WAG-108D14  
ctg1680□ctg5132□ctg5766□WAG-31D21  
ctg1680□ctg5132□ctg5766□WAG-35G15  
ctg1681□□□WAG-29G2  
ctg1681□ctg3693□□WAG-112I16  
ctg1681□ctg3693□ctg5050□WAG-109I6  
ctg1681□ctg3693□ctg5050□WAG-120P2  
ctg1681□ctg3693□ctg6833□WAG-80G18  
ctg1681□ctg3693□ctg6833□WAG-83E2  
ctg1682□□□WAG-31B22  
ctg1682□□□WAG-34N4  
ctg1682□□□WAG-95C24  
ctg1682□ctg3532□□WAG-8I5  
ctg1682□ctg3532□□WAG-15N10  
ctg1682□ctg3532□□WAG-53G6  
ctg1682□ctg3532□□WAG-68P12  
ctg1682□ctg3532□□WAG-88K4  
ctg1682□ctg3532□□WAG-91M13  
ctg1682□ctg3791□□WAG-125A15  
ctg1682□ctg3791□ctg4047□WAG-37A7  
ctg1682□ctg3791□ctg4047□WAG-60H9  
ctg1682□ctg3791□ctg4047□WAG-74D15  
ctg1683□ctg3167□ctg3190□WAG-27L2  
ctg1683□ctg3167□ctg3190□WAG-80O8  
ctg1683□ctg3167□ctg3190□WAG-115I20  
ctg1684□□□WAG-46L14  
ctg1684□□□WAG-75I15  
ctg1684□ctg3317□□WAG-4P21  
ctg1684□ctg3317□□WAG-97C22  
ctg1684□ctg3317□□WAG-103O19  
ctg1684□ctg3317□ctg6312□WAG-57A16  
ctg1684□ctg3317□ctg6312□WAG-90M17  
ctg1685□□□WAG-54F1  
ctg1685□ctg4926□ctg5277□WAG-19B18

ctg1685□ctg4926□ctg5277□WAG-111A10  
ctg1685□ctg6415□□WAG-12H14  
ctg1685□ctg6415□□WAG-55E3  
ctg1686□□□WAG-39F24  
ctg1686□ctg3703□□WAG-67A20  
ctg1686□ctg3703□ctg4824□WAG-2C5  
ctg1686□ctg3703□ctg4824□WAG-117B20  
ctg1686□ctg5628□ctg6803□WAG-51C14  
ctg1686□ctg5628□ctg6803□WAG-107J18  
ctg1687□ctg3707□□WAG-56P12  
ctg1687□ctg3707□□WAG-101I14  
ctg1687□ctg3707□ctg3918□WAG-19M13  
ctg1687□ctg3707□ctg3918□WAG-22F4  
ctg1687□ctg3707□ctg3918□WAG-44P6  
ctg1688□ctg3177□ctg3195□WAG-16O18  
ctg1688□ctg3177□ctg3195□WAG-46P23  
ctg1688□ctg3177□ctg3195□WAG-52D12  
ctg1689□ctg3183□ctg3205□WAG-72K11  
ctg1689□ctg3183□ctg3205□WAG-83B15  
ctg1689□ctg3183□ctg3205□WAG-103P17  
ctg169□□□WAG-45C24  
ctg169□□□WAG-90A24  
ctg169□□□WAG-124O16  
ctg169□ctg4631□□WAG-51H22  
ctg169□ctg4631□□WAG-62J15  
ctg169□ctg4631□□WAG-119P13  
ctg169□ctg546□□WAG-9C14  
ctg169□ctg546□ctg577□WAG-28J12  
ctg169□ctg546□ctg577□WAG-53O14  
ctg169□ctg546□ctg577□WAG-70B3  
ctg169□ctg546□ctg577□WAG-73D13  
ctg169□ctg546□ctg577□WAG-74K1  
ctg169□ctg546□ctg577□WAG-76I23  
ctg169□ctg546□ctg577□WAG-91P18  
ctg1690□ctg3184□ctg3208□WAG-33O1  
ctg1690□ctg3184□ctg3208□WAG-68C19  
ctg1691□□□WAG-50L11  
ctg1691□□□WAG-67P7  
ctg1691□ctg3709□□WAG-24O7  
ctg1691□ctg3709□□WAG-55N14  
ctg1691□ctg3709□□WAG-58H14  
ctg1691□ctg3709□□WAG-89O12  
ctg1691□ctg3709□□WAG-130D22  
ctg1692□ctg3291□ctg3341□WAG-17F12  
ctg1692□ctg3291□ctg3341□WAG-47N18  
ctg1692□ctg3291□ctg3341□WAG-49F6  
ctg1692□ctg3291□ctg3341□WAG-90I1  
ctg1693□□□WAG-60L3  
ctg1693□□□WAG-102J15  
ctg1693□ctg3190□□WAG-18J8  
ctg1693□ctg3190□□WAG-25P3  
ctg1693□ctg3190□□WAG-73G2  
ctg1693□ctg3190□□WAG-96A7  
ctg1693□ctg3190□ctg6219□WAG-33O7  
ctg1693□ctg3190□ctg6219□WAG-37H22  
ctg1693□ctg5107□ctg5704□WAG-116I13

ctg1693□ctg5107□ctg5704□WAG-129O2  
ctg1693□ctg5323□ctg6208□WAG-33L21  
ctg1693□ctg5323□ctg6208□WAG-90K2  
ctg1694□ctg3191□□WAG-103P23  
ctg1694□ctg3191□□WAG-110O17  
ctg1694□ctg3191□ctg5357□WAG-24J9  
ctg1694□ctg3191□ctg5357□WAG-57N14  
ctg1695□ctg3208□ctg3234□WAG-39F2  
ctg1695□ctg3208□ctg3234□WAG-48I16  
ctg1695□ctg3208□ctg3234□WAG-91H3  
ctg1695□ctg6121□□WAG-53H6  
ctg1695□ctg6121□□WAG-124B17  
ctg1696□ctg3211□ctg3239□WAG-34J10  
ctg1696□ctg3211□ctg3239□WAG-95C22  
ctg1696□ctg3211□ctg3239□WAG-99G23  
ctg1697□ctg3212□ctg3241□WAG-69N14  
ctg1697□ctg3212□ctg3241□WAG-128I11  
ctg1698□□□WAG-9M3  
ctg1698□□□WAG-54K19  
ctg1698□□□WAG-72B24  
ctg1698□ctg3213□ctg3242□WAG-41F6  
ctg1698□ctg3213□ctg3242□WAG-65O20  
ctg1698□ctg3213□ctg3242□WAG-89N6  
ctg1698□ctg6220□□WAG-126I22  
ctg1698□ctg6220□□WAG-129P7  
ctg1699□ctg3217□□WAG-83C10  
ctg1699□ctg3217□□WAG-92B1  
ctg1699□ctg3217□ctg5816□WAG-42P7  
ctg1699□ctg3217□ctg5816□WAG-102L24  
ctg17□ctg86□ctg80□WAG-17N4  
ctg17□ctg86□ctg80□WAG-29O7  
ctg17□ctg86□ctg80□WAG-59F22  
ctg17□ctg86□ctg80□WAG-62O19  
ctg17□ctg86□ctg80□WAG-70M1  
ctg17□ctg86□ctg80□WAG-71A1  
ctg17□ctg86□ctg80□WAG-77E11  
ctg17□ctg86□ctg80□WAG-79J2  
ctg17□ctg86□ctg80□WAG-91G11  
ctg17□ctg86□ctg80□WAG-109P8  
ctg17□ctg86□ctg80□WAG-114O8  
ctg17□ctg86□ctg80□WAG-116H18  
ctg170□□□WAG-4I24  
ctg170□□□WAG-33M9  
ctg170□□□WAG-43B12  
ctg170□ctg4557□ctg4695□WAG-90P1  
ctg170□ctg4557□ctg4695□WAG-129C4  
ctg170□ctg565□□WAG-27K7  
ctg170□ctg565□□WAG-35A17  
ctg170□ctg565□ctg2554□WAG-21H21  
ctg170□ctg565□ctg2554□WAG-23C24  
ctg170□ctg565□ctg2554□WAG-63J18  
ctg170□ctg565□ctg2554□WAG-72H2  
ctg170□ctg565□ctg758□WAG-10I7  
ctg170□ctg565□ctg758□WAG-59H3  
ctg170□ctg565□ctg758□WAG-70L20  
ctg170□ctg565□ctg758□WAG-75J18



ctg170□ctg565□ctg758□WAG-82A1  
ctg170□ctg565□ctg758□WAG-104E14  
ctg170□ctg565□ctg758□WAG-114H1  
ctg1700□ctg3736□ctg3965□WAG-46N11  
ctg1700□ctg3736□ctg3965□WAG-48G18  
ctg1700□ctg4223□ctg4430□WAG-119H15  
ctg1700□ctg4223□ctg4430□WAG-125P8  
ctg1701□ctg3219□ctg4239□WAG-46I4  
ctg1701□ctg3219□ctg4239□WAG-119C18  
ctg1701□ctg3219□ctg4239□WAG-120M10  
ctg1701□ctg3219□ctg4239□WAG-125D19  
ctg1702□ctg3220□□WAG-48J2  
ctg1702□ctg3220□ctg4387□WAG-97H19  
ctg1702□ctg3220□ctg4387□WAG-120I3  
ctg1702□ctg3220□ctg4387□WAG-121C11  
ctg1703□ctg3227□ctg3259□WAG-26I11  
ctg1703□ctg3227□ctg3259□WAG-83A14  
ctg1704□ctg3228□□WAG-19I22  
ctg1704□ctg3228□□WAG-39N1  
ctg1704□ctg3228□ctg3260□WAG-18M17  
ctg1704□ctg3228□ctg3260□WAG-37M8  
ctg1704□ctg3228□ctg3260□WAG-104F24  
ctg1705□ctg3855□□WAG-50M23  
ctg1705□ctg3855□ctg4127□WAG-92B16  
ctg1705□ctg3855□ctg4127□WAG-124P21  
ctg1706□□□WAG-72O2  
ctg1706□ctg4599□□WAG-5D9  
ctg1706□ctg4599□□WAG-62G23  
ctg1706□ctg4599□□WAG-74H20  
ctg1706□ctg4599□□WAG-115G10  
ctg1707□□□WAG-90J5  
ctg1707□ctg3755□□WAG-104L17  
ctg1707□ctg3755□ctg4939□WAG-26I13  
ctg1707□ctg3755□ctg4939□WAG-66A3  
ctg1708□□□WAG-53P6  
ctg1708□□□WAG-90P7  
ctg1708□ctg4605□ctg4765□WAG-71O22  
ctg1708□ctg4605□ctg4765□WAG-123N21  
ctg1708□ctg4831□□WAG-71O21  
ctg1708□ctg4831□□WAG-97D4  
ctg1708□ctg4831□□WAG-114K18  
ctg1709□ctg3670□□WAG-73E1  
ctg1709□ctg3670□ctg6823□WAG-41P13  
ctg1709□ctg3670□ctg6823□WAG-118C1  
ctg1709□ctg3670□ctg6952□WAG-95P3  
ctg1709□ctg3670□ctg6952□WAG-106D15  
ctg171□□□WAG-100A4  
ctg171□ctg567□□WAG-1F3  
ctg171□ctg567□ctg618□WAG-11F10  
ctg171□ctg567□ctg618□WAG-18O24  
ctg171□ctg567□ctg618□WAG-59N22  
ctg171□ctg567□ctg618□WAG-59N  
ctg171□ctg567□ctg618□WAG-108P13  
ctg171□ctg567□ctg618□WAG-122I11  
ctg1710□□□WAG-32N14  
ctg1710□□□WAG-49E24

ctg1710□ctg3757□□WAG-69I23  
ctg1710□ctg3757□ctg5203□WAG-58M19  
ctg1710□ctg3757□ctg5203□WAG-123N5  
ctg1710□ctg4835□□WAG-22J14  
ctg1710□ctg4835□□WAG-27N13  
ctg1710□ctg4835□□WAG-130K19  
ctg1710□ctg5560□ctg6708□WAG-44H4  
ctg1710□ctg5560□ctg6708□WAG-106F21  
ctg1711□□□WAG-19H1  
ctg1711□ctg3236□ctg3272□WAG-39L21  
ctg1711□ctg3236□ctg3272□WAG-96J8  
ctg1711□ctg3236□ctg3272□WAG-107F3  
ctg1712□□□WAG-53J22  
ctg1712□□□WAG-64A21  
ctg1712□□□WAG-71F6  
ctg1712□ctg4737□ctg4937□WAG-35J16  
ctg1712□ctg4737□ctg4937□WAG-53F10  
ctg1712□ctg5615□□WAG-1J12  
ctg1712□ctg5615□□WAG-9L19  
ctg1713□□□WAG-7J1  
ctg1713□□□WAG-17D13  
ctg1713□ctg4620□□WAG-36K7  
ctg1713□ctg4620□□WAG-42H9  
ctg1713□ctg4620□□WAG-105J1  
ctg1714□□□WAG-1K22  
ctg1714□ctg3763□ctg3997□WAG-4E2  
ctg1714□ctg3763□ctg3997□WAG-40P13  
ctg1714□ctg3763□ctg3997□WAG-112F6  
ctg1715□□□WAG-113K3  
ctg1715□ctg3878□□WAG-81I22  
ctg1715□ctg3878□□WAG-123J17  
ctg1715□ctg3878□ctg5196□WAG-9D10  
ctg1715□ctg3878□ctg5196□WAG-34D14  
ctg1716□□□WAG-20B1  
ctg1716□ctg3769□ctg4015□WAG-25C13  
ctg1716□ctg3769□ctg4015□WAG-107M17  
ctg1717□ctg3244□ctg3282□WAG-1N19  
ctg1717□ctg3244□ctg3282□WAG-70M17  
ctg1717□ctg3244□ctg3282□WAG-93L5  
ctg1718□□□WAG-52A7  
ctg1718□□□WAG-54F12  
ctg1718□ctg3481□□WAG-105K4  
ctg1718□ctg3481□□WAG-110M13  
ctg1718□ctg3481□ctg4699□WAG-89G10  
ctg1718□ctg3481□ctg4699□WAG-121M17  
ctg1718□ctg6195□□WAG-9P13  
ctg1718□ctg6195□□WAG-56B20  
ctg1718□ctg6496□□WAG-31G3  
ctg1718□ctg6496□□WAG-108D23  
ctg1719□□□WAG-65E17  
ctg1719□ctg3520□□WAG-34P3  
ctg1719□ctg3520□□WAG-103P8  
ctg1719□ctg3520□ctg5592□WAG-60A10  
ctg1719□ctg3520□ctg5592□WAG-76N13  
ctg172□□□WAG-33E23  
ctg172□ctg570□□WAG-94C17

ctg172□ctg570□ctg4656□WAG-24F12  
ctg172□ctg570□ctg4656□WAG-26G7  
ctg172□ctg570□ctg622□WAG-17L22  
ctg172□ctg570□ctg622□WAG-42E22  
ctg172□ctg570□ctg622□WAG-60J5  
ctg172□ctg570□ctg622□WAG-60P10  
ctg172□ctg570□ctg622□WAG-78O7  
ctg172□ctg570□ctg622□WAG-84D20  
ctg172□ctg570□ctg622□WAG-98H22  
ctg172□ctg570□ctg622□WAG-113E3  
ctg172□ctg570□ctg622□WAG-116O16  
ctg172□ctg570□ctg6764□WAG-25J14  
ctg172□ctg570□ctg6764□WAG-41C5  
ctg1720□ctg3246□ctg3284□WAG-21E11  
ctg1720□ctg3246□ctg3284□WAG-45N20  
ctg1720□ctg3246□ctg3284□WAG-83M1  
ctg1721□ctg3250□ctg3291□WAG-37O9  
ctg1721□ctg3250□ctg3291□WAG-95H22  
ctg1721□ctg3250□ctg3291□WAG-118H14  
ctg1722□ctg3251□□WAG-15O11  
ctg1722□ctg3251□ctg3292□WAG-37M13  
ctg1722□ctg3251□ctg3292□WAG-79C6  
ctg1722□ctg3251□ctg3292□WAG-116A18  
ctg1723□ctg3883□□WAG-68E14  
ctg1723□ctg3883□ctg4152□WAG-12I12  
ctg1723□ctg3883□ctg4152□WAG-33O3  
ctg1723□ctg3883□ctg4152□WAG-45G23  
ctg1723□ctg3883□ctg4152□WAG-91K10  
ctg1724□□□WAG-14O20  
ctg1724□□□WAG-98M24  
ctg1724□ctg3753□□WAG-8G21  
ctg1724□ctg3753□ctg4914□WAG-69A21  
ctg1724□ctg3753□ctg4914□WAG-127F21  
ctg1724□ctg6129□□WAG-7C2  
ctg1724□ctg6129□□WAG-102N15  
ctg1725□ctg3775□□WAG-112A16  
ctg1725□ctg3775□ctg4026□WAG-98I7  
ctg1725□ctg3775□ctg4026□WAG-130H11  
ctg1725□ctg5531□ctg6662□WAG-29L18  
ctg1725□ctg5531□ctg6662□WAG-58P23  
ctg1726□□□WAG-3P2  
ctg1726□□□WAG-126H21  
ctg1726□□□WAG-127F3  
ctg1726□ctg5713□ctg6864□WAG-28B13  
ctg1726□ctg5713□ctg6864□WAG-53H14  
ctg1727□ctg3259□□WAG-9M12  
ctg1727□ctg3259□ctg5405□WAG-66B18  
ctg1727□ctg3259□ctg5405□WAG-102B3  
ctg1727□ctg3259□ctg6032□WAG-1O8  
ctg1727□ctg3259□ctg6032□WAG-44A12  
ctg1728□□□WAG-34B21  
ctg1728□ctg3260□□WAG-5L4  
ctg1728□ctg3260□□WAG-54G11  
ctg1728□ctg3260□□WAG-55F5  
ctg1728□ctg3260□ctg4312□WAG-37F15  
ctg1728□ctg3260□ctg4312□WAG-46C7

ctg1728□ctg3260□ctg4312□WAG-90C15  
ctg1729□ctg3898□□WAG-85C13  
ctg1729□ctg3898□ctg5645□WAG-50M7  
ctg1729□ctg3898□ctg5645□WAG-129C13  
ctg1729□ctg3934□□WAG-68M7  
ctg1729□ctg3934□ctg5330□WAG-18G6  
ctg1729□ctg3934□ctg5330□WAG-117D18  
ctg173□□□WAG-44J10  
ctg173□ctg690□□WAG-11I20  
ctg173□ctg690□□WAG-16I22  
ctg173□ctg690□ctg737□WAG-45E13  
ctg173□ctg690□ctg737□WAG-70F17  
ctg173□ctg690□ctg737□WAG-78M22  
ctg173□ctg690□ctg737□WAG-83O1  
ctg173□ctg690□ctg737□WAG-93H9  
ctg173□ctg690□ctg737□WAG-97I14  
ctg173□ctg690□ctg737□WAG-109N5  
ctg173□ctg690□ctg737□WAG-117N14  
ctg173□ctg690□ctg737□WAG-123E10  
ctg173□ctg690□ctg737□WAG-130L12  
ctg1730□ctg3792□ctg4051□WAG-21C6  
ctg1730□ctg3792□ctg4051□WAG-118D19  
ctg1730□ctg4444□□WAG-78G22  
ctg1730□ctg4444□ctg6799□WAG-7N12  
ctg1730□ctg4444□ctg6799□WAG-69A20  
ctg1731□ctg3779□ctg4031□WAG-60F15  
ctg1731□ctg3779□ctg4031□WAG-72M10  
ctg1731□ctg6179□□WAG-38O13  
ctg1731□ctg6179□□WAG-88I5  
ctg1732□□□WAG-2E19  
ctg1732□ctg3263□□WAG-27O23  
ctg1732□ctg3263□ctg4162□WAG-78K21  
ctg1732□ctg3263□ctg4162□WAG-115H7  
ctg1732□ctg3263□ctg4162□WAG-122J15  
ctg1733□ctg3265□□WAG-1O2  
ctg1733□ctg3265□□WAG-106E12  
ctg1733□ctg3265□ctg6569□WAG-11P11  
ctg1733□ctg3265□ctg6569□WAG-52L6  
ctg1734□□□WAG-114L21  
ctg1734□ctg3571□□WAG-83N20  
ctg1734□ctg3571□ctg4816□WAG-41J10  
ctg1734□ctg3571□ctg4816□WAG-115D7  
ctg1735□□□WAG-O4  
ctg1735□□□WAG-124J1  
ctg1735□ctg4661□ctg4823□WAG-41D23  
ctg1735□ctg4661□ctg4823□WAG-82H18  
ctg1736□ctg3682□□WAG-75N1  
ctg1736□ctg3682□□WAG-88G15  
ctg1736□ctg3682□□WAG-89E15  
ctg1736□ctg3682□ctg5038□WAG-43P5  
ctg1736□ctg3682□ctg5038□WAG-50M17  
ctg1737□ctg3267□□WAG-8C2  
ctg1737□ctg3267□ctg4321□WAG-79L11  
ctg1737□ctg3267□ctg4321□WAG-97H23  
ctg1738□ctg3268□ctg3315□WAG-47N8  
ctg1738□ctg3268□ctg3315□WAG-95J15

ctg1738□ctg3268□ctg3315□WAG-100C22  
ctg1739□ctg4393□□WAG-118H12  
ctg1739□ctg4393□ctg6925□WAG-4C6  
ctg1739□ctg4393□ctg6925□WAG-94M22  
ctg1739□ctg5728□□WAG-67O14  
ctg1739□ctg5728□□WAG-81H1  
ctg1739□ctg6148□□WAG-38P10  
ctg1739□ctg6148□□WAG-118D2  
ctg174□ctg475□□WAG-94O13  
ctg174□ctg475□ctg3800□WAG-64D14  
ctg174□ctg475□ctg3800□WAG-93N23  
ctg174□ctg475□ctg3800□WAG-117F4  
ctg174□ctg475□ctg500□WAG-8O20  
ctg174□ctg475□ctg500□WAG-41J11  
ctg174□ctg475□ctg500□WAG-44C9  
ctg174□ctg475□ctg500□WAG-61J16  
ctg174□ctg475□ctg500□WAG-68A17  
ctg174□ctg475□ctg500□WAG-76K23  
ctg174□ctg475□ctg500□WAG-79N12  
ctg174□ctg475□ctg500□WAG-80A20  
ctg174□ctg475□ctg500□WAG-89P16  
ctg174□ctg475□ctg500□WAG-109N24  
ctg174□ctg475□ctg500□WAG-122G3  
ctg174□ctg475□ctg500□WAG-126K9  
ctg1740□ctg3735□ctg3964□WAG-53A19  
ctg1740□ctg3735□ctg3964□WAG-124A12  
ctg1740□ctg6260□□WAG-29J24  
ctg1740□ctg6260□□WAG-102D6  
ctg1741□□□WAG-10P2  
ctg1741□ctg3807□ctg4066□WAG-89A9  
ctg1741□ctg3807□ctg4066□WAG-100M10  
ctg1742□□□WAG-23I2  
ctg1742□□□WAG-61H6  
ctg1742□□□WAG-80J15  
ctg1742□ctg3849□ctg4116□WAG-89E23  
ctg1742□ctg3849□ctg4116□WAG-109E19  
ctg1742□ctg3849□ctg4116□WAG-109J12  
ctg1742□ctg4333□ctg4516□WAG-10F10  
ctg1742□ctg4333□ctg4516□WAG-122O8  
ctg1742□ctg4720□ctg4906□WAG-46B16  
ctg1742□ctg4720□ctg4906□WAG-114P3  
ctg1742□ctg6486□□WAG-1O21  
ctg1742□ctg6486□□WAG-91O1  
ctg1743□□□WAG-83A1  
ctg1743□□□WAG-92A1  
ctg1743□□□WAG-117F14  
ctg1743□ctg3278□□WAG-98P15  
ctg1743□ctg3278□ctg4348□WAG-42I11  
ctg1743□ctg3278□ctg4348□WAG-43K20  
ctg1744□ctg3280□ctg3331□WAG-47F21  
ctg1744□ctg3280□ctg3331□WAG-79P2  
ctg1744□ctg3280□ctg3331□WAG-94F12  
ctg1745□□□WAG-108M20  
ctg1745□ctg3926□ctg4206□WAG-60J13  
ctg1745□ctg3926□ctg4206□WAG-90D2  
ctg1746□□□WAG-106E22

ctg1746□ctg3440□□WAG-81C21  
ctg1746□ctg3440□ctg3894□WAG-31D20  
ctg1746□ctg3440□ctg3894□WAG-49M17  
ctg1746□ctg3440□ctg3894□WAG-102B11  
ctg1747□□□WAG-85F13  
ctg1747□□□WAG-113E9  
ctg1747□ctg3558□ctg3722□WAG-10C17  
ctg1747□ctg3558□ctg3722□WAG-79D22  
ctg1747□ctg3558□ctg3722□WAG-86O3  
ctg1748□ctg3289□□WAG-19A2  
ctg1748□ctg3289□□WAG-69G17  
ctg1748□ctg3289□ctg6731□WAG-52E19  
ctg1748□ctg3289□ctg6731□WAG-108D24  
ctg1749□□□WAG-91N24  
ctg1749□ctg3290□□WAG-27M11  
ctg1749□ctg3290□□WAG-126N19  
ctg1749□ctg3290□ctg6737□WAG-8G4  
ctg1749□ctg3290□ctg6737□WAG-92C20  
ctg175□□□WAG-3O3  
ctg175□ctg635□□WAG-5H19  
ctg175□ctg635□□WAG-94E22  
ctg175□ctg635□ctg706□WAG-8G11  
ctg175□ctg635□ctg706□WAG-17F2  
ctg175□ctg635□ctg706□WAG-18B17  
ctg175□ctg635□ctg706□WAG-23N7  
ctg175□ctg635□ctg706□WAG-26I4  
ctg175□ctg635□ctg706□WAG-41A6  
ctg175□ctg635□ctg706□WAG-53C21  
ctg175□ctg635□ctg706□WAG-71J5  
ctg175□ctg635□ctg706□WAG-85A1  
ctg175□ctg635□ctg706□WAG-92G21  
ctg175□ctg635□ctg706□WAG-97B5  
ctg175□ctg635□ctg706□WAG-101K20  
ctg175□ctg635□ctg706□WAG-112G13  
ctg175□ctg635□ctg706□WAG-124B18  
ctg175□ctg635□ctg706□WAG-124E9  
ctg175□ctg635□ctg706□WAG-125E4  
ctg1750□□□WAG-32P13  
ctg1750□ctg3616□ctg3798□WAG-5O14  
ctg1750□ctg3616□ctg3798□WAG-104L1  
ctg1750□ctg3616□ctg3798□WAG-126J11  
ctg1751□□□WAG-22E21  
ctg1751□□□WAG-37O1  
ctg1751□ctg3657□□WAG-20H15  
ctg1751□ctg3657□□WAG-28F16  
ctg1751□ctg3657□ctg4462□WAG-104G18  
ctg1751□ctg3657□ctg4462□WAG-116N8  
ctg1752□□□WAG-107J14  
ctg1752□ctg3950□ctg4224□WAG-20M12  
ctg1752□ctg3950□ctg4224□WAG-79A3  
ctg1752□ctg3950□ctg4224□WAG-108O2  
ctg1753□ctg3687□□WAG-79H2  
ctg1753□ctg3687□ctg3888□WAG-19N19  
ctg1753□ctg3687□ctg3888□WAG-46B7  
ctg1753□ctg3687□ctg3888□WAG-123D20  
ctg1754□□□WAG-121A24

ctg1754□ctg3301□ctg3356□WAG-49K20  
ctg1754□ctg3301□ctg3356□WAG-92D8  
ctg1754□ctg3301□ctg3356□WAG-92E13  
ctg1755□□□WAG-96C3  
ctg1755□ctg3304□□WAG-41K15  
ctg1755□ctg3304□ctg4369□WAG-11A15  
ctg1755□ctg3304□ctg4369□WAG-119H16  
ctg1755□ctg3304□ctg4369□WAG-128L7  
ctg1756□ctg3306□□WAG-16P3  
ctg1756□ctg3306□ctg4494□WAG-29H7  
ctg1756□ctg3306□ctg4494□WAG-29I8  
ctg1757□□□WAG-14B12  
ctg1757□ctg3859□□WAG-14C6  
ctg1757□ctg3859□□WAG-107I9  
ctg1757□ctg3859□ctg5151□WAG-21I17  
ctg1757□ctg3859□ctg5151□WAG-77B11  
ctg1757□ctg5934□□WAG-10O18  
ctg1757□ctg5934□□WAG-54C14  
ctg1758□□□WAG-39O5  
ctg1758□ctg3860□□WAG-72G1  
ctg1758□ctg3860□ctg5110□WAG-9N3  
ctg1758□ctg3860□ctg5110□WAG-109P3  
ctg1759□□□WAG-83A18  
ctg1759□□□WAG-122H21  
ctg1759□ctg4830□□WAG-33L1  
ctg1759□ctg4830□□WAG-84J11  
ctg1759□ctg4830□□WAG-123P6  
ctg1759□ctg4848□ctg5126□WAG-94D15  
ctg1759□ctg4848□ctg5126□WAG-130F16  
ctg1759□ctg5353□ctg6286□WAG-30H10  
ctg1759□ctg5353□ctg6286□WAG-101P14  
ctg176□□□WAG-50O13  
ctg176□ctg733□□WAG-12I9  
ctg176□ctg733□□WAG-94D10  
ctg176□ctg733□ctg3801□WAG-83P15  
ctg176□ctg733□ctg3801□WAG-87A2  
ctg176□ctg733□ctg3801□WAG-97G8  
ctg176□ctg733□ctg946□WAG-35K17  
ctg176□ctg733□ctg946□WAG-45A22  
ctg176□ctg733□ctg946□WAG-56L4  
ctg176□ctg733□ctg946□WAG-59H14  
ctg176□ctg733□ctg946□WAG-95D4  
ctg176□ctg733□ctg946□WAG-105H11  
ctg1760□ctg4285□□WAG-56P3  
ctg1760□ctg4285□□WAG-65H22  
ctg1760□ctg4285□□WAG-78J20  
ctg1760□ctg4285□□WAG-83H10  
ctg1760□ctg5431□ctg6458□WAG-58G23  
ctg1760□ctg5431□ctg6458□WAG-96D12  
ctg1761□ctg3312□□WAG-39M16  
ctg1761□ctg3312□ctg4385□WAG-93E20  
ctg1761□ctg3312□ctg4385□WAG-111D2  
ctg1761□ctg3312□ctg4385□WAG-117K11  
ctg1762□ctg3866□ctg5560□WAG-41H23  
ctg1762□ctg3866□ctg5560□WAG-122A23  
ctg1762□ctg3866□ctg5851□WAG-3O8

ctg1762□ctg3866□ctg5851□WAG-85B12  
ctg1763□□□WAG-54J4  
ctg1763□ctg4896□ctg5221□WAG-66O12  
ctg1763□ctg4896□ctg5221□WAG-110H1  
ctg1763□ctg5935□□WAG-29I13  
ctg1763□ctg5935□□WAG-124O8  
ctg1764□□□WAG-82D20  
ctg1764□□□WAG-96E7  
ctg1764□ctg3939□ctg5227□WAG-31F11  
ctg1764□ctg3939□ctg5227□WAG-124G17  
ctg1764□ctg3939□ctg5368□WAG-22A20  
ctg1764□ctg3939□ctg5368□WAG-87L2  
ctg1765□ctg3992□ctg5209□WAG-61A23  
ctg1765□ctg3992□ctg5209□WAG-121O8  
ctg1765□ctg3992□ctg6095□WAG-8D11  
ctg1765□ctg3992□ctg6095□WAG-8I4  
ctg1766□ctg3322□ctg3386□WAG-63D21  
ctg1766□ctg3322□ctg3386□WAG-68F9  
ctg1766□ctg3322□ctg3386□WAG-113H22  
ctg1767□ctg3329□ctg3394□WAG-71E3  
ctg1767□ctg3329□ctg3394□WAG-100L19  
ctg1768□ctg3330□ctg3395□WAG-62B10  
ctg1768□ctg3330□ctg3395□WAG-106J14  
ctg1769□□□WAG-72H19  
ctg1769□ctg3982□ctg4249□WAG-21A14  
ctg1769□ctg3982□ctg4249□WAG-42E18  
ctg1769□ctg6000□□WAG-14H23  
ctg1769□ctg6000□□WAG-81J23  
ctg177□□□WAG-37H7  
ctg177□□□WAG-76A18  
ctg177□□□WAG-118B2  
ctg177□ctg5216□ctg5967□WAG-72B11  
ctg177□ctg5216□ctg5967□WAG-121D7  
ctg177□ctg5884□□WAG-6J23  
ctg177□ctg5884□□WAG-12M22  
ctg177□ctg716□ctg961□WAG-35I10  
ctg177□ctg716□ctg961□WAG-37J3  
ctg177□ctg716□ctg961□WAG-38B6  
ctg177□ctg716□ctg961□WAG-38N15  
ctg177□ctg716□ctg961□WAG-52C8  
ctg177□ctg716□ctg961□WAG-80N6  
ctg177□ctg716□ctg961□WAG-82L21  
ctg177□ctg716□ctg961□WAG-98I13  
ctg177□ctg716□ctg961□WAG-103L24  
ctg1770□□□WAG-G7  
ctg1770□ctg3997□ctg4265□WAG-11D13  
ctg1770□ctg3997□ctg4265□WAG-85B21  
ctg1770□ctg3997□ctg4265□WAG-110N19  
ctg1771□ctg3334□□WAG-48L18  
ctg1771□ctg3334□□WAG-66F20  
ctg1771□ctg3334□ctg4192□WAG-5J20  
ctg1771□ctg3334□ctg4192□WAG-20G3  
ctg1771□ctg3334□ctg4192□WAG-68B24  
ctg1772□□□WAG-120B22  
ctg1772□ctg3838□ctg4106□WAG-23N18  
ctg1772□ctg3838□ctg4106□WAG-29N22



ctg1772□ctg3838□ctg4106□WAG-37F12  
ctg1773□□□WAG-74I1  
ctg1773□□□WAG-96D5  
ctg1773□□□WAG-117C21  
ctg1773□ctg4548□□WAG-118I12  
ctg1773□ctg4548□ctg6917□WAG-123N15  
ctg1773□ctg4548□ctg6917□WAG-125E20  
ctg1774□□□WAG-25N14  
ctg1774□ctg3887□ctg4160□WAG-36A4  
ctg1774□ctg3887□ctg4160□WAG-49F3  
ctg1775□□□WAG-41F10  
ctg1775□□□WAG-107C16  
ctg1775□□□WAG-107L17  
ctg1775□ctg3341□□WAG-91K6  
ctg1775□ctg3341□□WAG-117K15  
ctg1775□ctg3341□ctg5921□WAG-51L9  
ctg1775□ctg3341□ctg5921□WAG-57N20  
ctg1775□ctg3979□ctg4244□WAG-90N20  
ctg1775□ctg3979□ctg4244□WAG-99N23  
ctg1775□ctg4128□ctg5736□WAG-14P21  
ctg1775□ctg4128□ctg5736□WAG-17C20  
ctg1775□ctg4128□ctg6061□WAG-21J5  
ctg1775□ctg4128□ctg6061□WAG-33P6  
ctg1775□ctg5089□ctg5665□WAG-1K15  
ctg1775□ctg5089□ctg5665□WAG-26O20  
ctg1775□ctg6462□□WAG-69A14  
ctg1775□ctg6462□□WAG-99N15  
ctg1776□□□WAG-74M3  
ctg1776□□□WAG-101H16  
ctg1776□ctg4156□□WAG-13M8  
ctg1776□ctg4156□□WAG-45A13  
ctg1776□ctg4156□ctg5929□WAG-40M15  
ctg1776□ctg4156□ctg5929□WAG-46C24  
ctg1777□ctg3342□□WAG-38A7  
ctg1777□ctg3342□□WAG-111F15  
ctg1777□ctg3342□□WAG-115P6  
ctg1777□ctg3342□ctg5950□WAG-90B5  
ctg1777□ctg3342□ctg5950□WAG-125E5  
ctg1777□ctg5206□ctg5937□WAG-28G4  
ctg1777□ctg5206□ctg5937□WAG-100C12  
ctg1778□ctg3346□□WAG-22N16  
ctg1778□ctg3346□ctg4531□WAG-18I18  
ctg1778□ctg3346□ctg4531□WAG-121I13  
ctg1779□□□WAG-55J10  
ctg1779□ctg3891□ctg4166□WAG-30I18  
ctg1779□ctg3891□ctg4166□WAG-40I15  
ctg1779□ctg3891□ctg4166□WAG-104G17  
ctg178□ctg564□□WAG-32M16  
ctg178□ctg564□ctg779□WAG-2G2  
ctg178□ctg564□ctg779□WAG-30I17  
ctg178□ctg564□ctg779□WAG-31N4  
ctg178□ctg564□ctg779□WAG-33N20  
ctg178□ctg564□ctg779□WAG-44N21  
ctg178□ctg564□ctg779□WAG-109A2  
ctg178□ctg564□ctg779□WAG-120D23  
ctg1780□□□WAG-51A24

ctg1780□ctg4038□ctg4301□WAG-33P1  
ctg1780□ctg4038□ctg4301□WAG-62J17  
ctg1780□ctg4038□ctg4301□WAG-128G3  
ctg1781□□□WAG-99P19  
ctg1781□ctg4039□□WAG-49O10  
ctg1781□ctg4039□ctg4305□WAG-4M4  
ctg1781□ctg4039□ctg4305□WAG-56K21  
ctg1781□ctg4039□ctg4305□WAG-87L10  
ctg1782□□□WAG-83P8  
ctg1782□□□WAG-84F5  
ctg1782□□□WAG-127E8  
ctg1782□ctg3903□□WAG-126O3  
ctg1782□ctg3903□ctg4179□WAG-74N2  
ctg1782□ctg3903□ctg4179□WAG-79F11  
ctg1782□ctg3903□ctg4179□WAG-126P21  
ctg1783□ctg3354□ctg3429□WAG-18A17  
ctg1783□ctg3354□ctg3429□WAG-67I16  
ctg1783□ctg3354□ctg3429□WAG-130B20  
ctg1784□ctg3492□□WAG-103O5  
ctg1784□ctg3492□ctg4720□WAG-50J11  
ctg1784□ctg3492□ctg4720□WAG-114O4  
ctg1784□ctg5040□ctg5549□WAG-85E7  
ctg1784□ctg5040□ctg5549□WAG-102C13  
ctg1785□□□WAG-4O14  
ctg1785□□□WAG-32F7  
ctg1785□□□WAG-118J4  
ctg1785□ctg3785□ctg4037□WAG-8E17  
ctg1785□ctg3785□ctg4037□WAG-105A9  
ctg1785□ctg3785□ctg4037□WAG-111I4  
ctg1786□□□WAG-38A4  
ctg1786□ctg4056□ctg4318□WAG-96P2  
ctg1786□ctg4056□ctg4318□WAG-113E8  
ctg1787□ctg3362□□WAG-97F19  
ctg1787□ctg3362□ctg6613□WAG-9L6  
ctg1787□ctg3362□ctg6613□WAG-103C7  
ctg1787□ctg3362□ctg6842□WAG-57K11  
ctg1787□ctg3362□ctg6842□WAG-110I22  
ctg1788□□□WAG-13I18  
ctg1788□□□WAG-38K1  
ctg1788□□□WAG-70C24  
ctg1788□□□WAG-125M16  
ctg1788□ctg3367□ctg3438□WAG-26K5  
ctg1788□ctg3367□ctg3438□WAG-49H4  
ctg1788□ctg3367□ctg3438□WAG-79D15  
ctg1789□ctg3370□ctg3445□WAG-92B23  
ctg1789□ctg3370□ctg3445□WAG-124F22  
ctg179□□□WAG-26F4  
ctg179□□□WAG-55B12  
ctg179□□□WAG-64I18  
ctg179□ctg712□□WAG-40M20  
ctg179□ctg712□ctg1753□WAG-22K17  
ctg179□ctg712□ctg1753□WAG-36P20  
ctg179□ctg712□ctg1753□WAG-40I1  
ctg179□ctg712□ctg1753□WAG-63E12  
ctg179□ctg712□ctg735□WAG-25A1  
ctg179□ctg712□ctg735□WAG-25H5

ctg179□ctg712□ctg735□WAG-49P6  
ctg179□ctg712□ctg735□WAG-66O24  
ctg179□ctg712□ctg735□WAG-67H19  
ctg179□ctg712□ctg735□WAG-78B17  
ctg179□ctg712□ctg735□WAG-111B12  
ctg179□ctg712□ctg735□WAG-124C22  
ctg179□ctg712□ctg735□WAG-127J13  
ctg179□ctg712□ctg735□WAG-129F11  
ctg179□ctg712□ctg735□WAG-129K8  
ctg1790□□□WAG-127F20  
ctg1790□ctg3371□ctg3446□WAG-26H19  
ctg1790□ctg3371□ctg3446□WAG-115I1  
ctg1791□□□WAG-73E9  
ctg1791□ctg3373□□WAG-36L10  
ctg1791□ctg3373□□WAG-115O1  
ctg1791□ctg3373□ctg6091□WAG-16K13  
ctg1791□ctg3373□ctg6091□WAG-32G16  
ctg1792□□□WAG-1M10  
ctg1792□□□WAG-37K17  
ctg1792□□□WAG-45J3  
ctg1792□□□WAG-127P7  
ctg1792□ctg3941□□WAG-13E19  
ctg1792□ctg3941□ctg5739□WAG-37G14  
ctg1792□ctg3941□ctg5739□WAG-38N10  
ctg1793□ctg3376□ctg3452□WAG-24B10  
ctg1793□ctg3376□ctg3452□WAG-74H21  
ctg1793□ctg3376□ctg3452□WAG-105O22  
ctg1794□□□WAG-21L4  
ctg1794□□□WAG-87G12  
ctg1794□□□WAG-119M11  
ctg1794□ctg6192□□WAG-42F8  
ctg1794□ctg6192□□WAG-62I5  
ctg1795□ctg3986□ctg5840□WAG-15D9  
ctg1795□ctg3986□ctg5840□WAG-121J6  
ctg1795□ctg3986□ctg6165□WAG-64I3  
ctg1795□ctg3986□ctg6165□WAG-67K8  
ctg1796□□□WAG-38K11  
ctg1796□□□WAG-78N19  
ctg1796□ctg3381□ctg3458□WAG-53I13  
ctg1796□ctg3381□ctg3458□WAG-101O8  
ctg1796□ctg3381□ctg3458□WAG-123F11  
ctg1797□ctg3383□ctg3466□WAG-107B10  
ctg1797□ctg3383□ctg3466□WAG-112L7  
ctg1797□ctg3383□ctg3466□WAG-129C17  
ctg1798□ctg3384□ctg3469□WAG-40N9  
ctg1798□ctg3384□ctg3469□WAG-95E20  
ctg1798□ctg3384□ctg3469□WAG-114G24  
ctg1799□ctg3386□ctg3473□WAG-54O16  
ctg1799□ctg3386□ctg3473□WAG-85O24  
ctg18□□□WAG-14L3  
ctg18□□□WAG-19D6  
ctg18□ctg2414□ctg2314□WAG-25J16  
ctg18□ctg2414□ctg2314□WAG-56A19  
ctg18□ctg2414□ctg2314□WAG-80A3  
ctg18□ctg510□□WAG-27J13  
ctg18□ctg510□□WAG-79P1

ctg18□ctg510□□WAG-128K1  
ctg18□ctg510□ctg898□WAG-55H15  
ctg18□ctg510□ctg898□WAG-79G23  
ctg18□ctg510□ctg898□WAG-85C7  
ctg18□ctg510□ctg898□WAG-121I12  
ctg18□ctg75□ctg56□WAG-17N5  
ctg18□ctg75□ctg56□WAG-18C2  
ctg18□ctg75□ctg56□WAG-20I7  
ctg18□ctg75□ctg56□WAG-43G13  
ctg18□ctg75□ctg56□WAG-43L24  
ctg18□ctg75□ctg56□WAG-44K22  
ctg18□ctg75□ctg56□WAG-45J7  
ctg18□ctg75□ctg56□WAG-45P24  
ctg18□ctg75□ctg56□WAG-114P15  
ctg180□□□WAG-49P15  
ctg180□□□WAG-88O24  
ctg180□ctg704□□WAG-108D22  
ctg180□ctg704□ctg947□WAG-45J11  
ctg180□ctg704□ctg947□WAG-55C1  
ctg180□ctg704□ctg947□WAG-58L19  
ctg180□ctg704□ctg947□WAG-60L18  
ctg180□ctg704□ctg947□WAG-67J14  
ctg180□ctg704□ctg947□WAG-93F17  
ctg180□ctg704□ctg947□WAG-94H8  
ctg180□ctg704□ctg947□WAG-120B20  
ctg1800□ctg3387□ctg3474□WAG-71D6  
ctg1800□ctg3387□ctg3474□WAG-84O5  
ctg1801□□□WAG-36A8  
ctg1801□□□WAG-43O2  
ctg1801□□□WAG-93M3  
ctg1801□ctg3390□□WAG-61L7  
ctg1801□ctg3390□□WAG-93O24  
ctg1801□ctg3390□ctg6163□WAG-1H5  
ctg1801□ctg3390□ctg6163□WAG-70F16  
ctg1802□□□WAG-61L23  
ctg1802□ctg4455□□WAG-19L13  
ctg1802□ctg4455□□WAG-20P11  
ctg1802□ctg4455□□WAG-116N15  
ctg1802□ctg4643□□WAG-28I17  
ctg1802□ctg4643□□WAG-57P13  
ctg1802□ctg4643□□WAG-59K22  
ctg1803□ctg3773□□WAG-90D23  
ctg1803□ctg3773□ctg5246□WAG-29K2  
ctg1803□ctg3773□ctg5246□WAG-83O5  
ctg1803□ctg3773□ctg6643□WAG-57M20  
ctg1803□ctg3773□ctg6643□WAG-59L13  
ctg1803□ctg3957□ctg4232□WAG-97J7  
ctg1803□ctg3957□ctg4232□WAG-107F13  
ctg1804□□□WAG-27P6  
ctg1804□ctg3461□ctg3582□WAG-23M22  
ctg1804□ctg3461□ctg3582□WAG-117P8  
ctg1804□ctg3461□ctg3582□WAG-120K5  
ctg1804□ctg6398□□WAG-58M15  
ctg1804□ctg6398□□WAG-93H5  
ctg1805□ctg3395□ctg3490□WAG-62E15  
ctg1805□ctg3395□ctg3490□WAG-65M15

ctg1805□ctg3395□ctg3490□WAG-74J22  
ctg1806□ctg3397□ctg3496□WAG-4O21  
ctg1806□ctg3397□ctg3496□WAG-100D8  
ctg1806□ctg3397□ctg3496□WAG-124N4  
ctg1807□□□WAG-29A3  
ctg1807□□□WAG-45J14  
ctg1807□□□WAG-70M10  
ctg1807□ctg4763□ctg4973□WAG-12H24  
ctg1807□ctg4763□ctg4973□WAG-70K8  
ctg1807□ctg6243□□WAG-5B15  
ctg1807□ctg6243□□WAG-64K16  
ctg1808□ctg3417□ctg4488□WAG-22B21  
ctg1808□ctg3417□ctg4488□WAG-100O9  
ctg1808□ctg3417□ctg5476□WAG-8A1  
ctg1808□ctg3417□ctg5476□WAG-85A22  
ctg1809□ctg3935□ctg5335□WAG-41E21  
ctg1809□ctg3935□ctg5335□WAG-107D8  
ctg1809□ctg3935□ctg5743□WAG-104I10  
ctg1809□ctg3935□ctg5743□WAG-121J2  
ctg181□ctg2847□ctg4601□WAG-110B21  
ctg181□ctg2847□ctg4601□WAG-113J3  
ctg181□ctg2847□ctg4900□WAG-76D5  
ctg181□ctg2847□ctg4900□WAG-78F22  
ctg1810□ctg3403□ctg4479□WAG-17B12  
ctg1810□ctg3403□ctg4479□WAG-44C12  
ctg1810□ctg3403□ctg4479□WAG-56I11  
ctg1811□□□WAG-14C23  
ctg1811□ctg5236□ctg6012□WAG-49M15  
ctg1811□ctg5236□ctg6012□WAG-91G23  
ctg1811□ctg6283□□WAG-28G24  
ctg1811□ctg6283□□WAG-110K1  
ctg1811□ctg6518□□WAG-30O14  
ctg1811□ctg6518□□WAG-55I17  
ctg1812□ctg3405□ctg3499□WAG-54G2  
ctg1812□ctg3405□ctg3499□WAG-75H22  
ctg1812□ctg3405□ctg3499□WAG-79I14  
ctg1813□ctg3407□ctg3502□WAG-44G9  
ctg1813□ctg3407□ctg3502□WAG-47J7  
ctg1813□ctg3407□ctg3502□WAG-107J23  
ctg1814□□□WAG-61H11  
ctg1814□ctg4112□□WAG-100K20  
ctg1814□ctg4112□ctg6275□WAG-57D7  
ctg1814□ctg4112□ctg6275□WAG-64H11  
ctg1815□□□WAG-59E10  
ctg1815□ctg4994□ctg5442□WAG-56J9  
ctg1815□ctg4994□ctg5442□WAG-98E20  
ctg1815□ctg5473□ctg6544□WAG-48I14  
ctg1815□ctg5473□ctg6544□WAG-93J18  
ctg1816□ctg3408□ctg3506□WAG-87D13  
ctg1816□ctg3408□ctg3506□WAG-102C3  
ctg1816□ctg3408□ctg3506□WAG-112E22  
ctg1817□ctg3409□ctg3509□WAG-40I8  
ctg1817□ctg3409□ctg3509□WAG-65P1  
ctg1817□ctg3409□ctg3509□WAG-89L17  
ctg1818□□□WAG-44P9  
ctg1818□□□WAG-77L8

ctg1818□ctg4735□ctg4933□WAG-32C21  
ctg1818□ctg4735□ctg4933□WAG-49C1  
ctg1818□ctg5748□□WAG-11F6  
ctg1818□ctg5748□□WAG-45J1  
ctg1819□□□WAG-6A1  
ctg1819□□□WAG-56G1  
ctg1819□□□WAG-123N18  
ctg1819□ctg4842□ctg5115□WAG-24D7  
ctg1819□ctg4842□ctg5115□WAG-97H4  
ctg182□ctg607□□WAG-1A10  
ctg182□ctg607□□WAG-1F24  
ctg182□ctg607□□WAG-2B2  
ctg182□ctg607□□WAG-39J16  
ctg182□ctg607□ctg2522□WAG-49G14  
ctg182□ctg607□ctg2522□WAG-80O6  
ctg182□ctg607□ctg2522□WAG-117B5  
ctg182□ctg607□ctg2522□WAG-128J24  
ctg182□ctg607□ctg640□WAG-30B15  
ctg182□ctg607□ctg640□WAG-46J12  
ctg182□ctg607□ctg640□WAG-46P2  
ctg182□ctg607□ctg640□WAG-62N12  
ctg182□ctg607□ctg640□WAG-68O12  
ctg182□ctg607□ctg640□WAG-88G5  
ctg182□ctg607□ctg640□WAG-108J1  
ctg1820□ctg3414□ctg3518□WAG-13B23  
ctg1820□ctg3414□ctg3518□WAG-53J7  
ctg1821□□□WAG-76I18  
ctg1821□ctg3990□ctg5498□WAG-20M17  
ctg1821□ctg3990□ctg5498□WAG-108B2  
ctg1821□ctg3990□ctg6678□WAG-78J21  
ctg1821□ctg3990□ctg6678□WAG-110H21  
ctg1822□□□WAG-20C16  
ctg1822□□□WAG-34L17  
ctg1822□□□WAG-37O6  
ctg1822□□□WAG-78J2  
ctg1822□ctg5971□□WAG-91E14  
ctg1822□ctg5971□□WAG-100I7  
ctg1823□□□WAG-2L23  
ctg1823□ctg4121□ctg4381□WAG-55H12  
ctg1823□ctg4121□ctg4381□WAG-60F17  
ctg1824□□□WAG-9C24  
ctg1824□ctg4774□□WAG-62J11  
ctg1824□ctg4774□□WAG-79O1  
ctg1824□ctg4774□□WAG-80O17  
ctg1824□ctg4801□□WAG-32O4  
ctg1824□ctg4801□□WAG-55C21  
ctg1824□ctg4801□□WAG-110J7  
ctg1825□ctg3419□ctg3520□WAG-43P8  
ctg1825□ctg3419□ctg3520□WAG-87L5  
ctg1825□ctg3419□ctg3520□WAG-103C22  
ctg1826□□□WAG-68L20  
ctg1826□□□WAG-93M15  
ctg1826□ctg4131□□WAG-10E16  
ctg1826□ctg4131□ctg6293□WAG-60L14  
ctg1826□ctg4131□ctg6293□WAG-130K1  
ctg1827□□□WAG-40C23

ctg1827□ctg4132□□WAG-62O5  
ctg1827□ctg4132□ctg6295□WAG-123N7  
ctg1827□ctg4132□ctg6295□WAG-127N1  
ctg1828□ctg3422□ctg3523□WAG-83I16  
ctg1828□ctg3422□ctg3523□WAG-83J15  
ctg1828□ctg3422□ctg3523□WAG-117C13  
ctg1829□ctg3424□ctg3532□WAG-9A15  
ctg1829□ctg3424□ctg3532□WAG-83C5  
ctg1829□ctg3424□ctg3532□WAG-98O14  
ctg183□□□WAG-47B7  
ctg183□□□WAG-73O20  
ctg183□□□WAG-128A19  
ctg183□ctg593□□WAG-34E5  
ctg183□ctg593□□WAG-81N5  
ctg183□ctg593□□WAG-107L12  
ctg183□ctg593□ctg1087□WAG-1B3  
ctg183□ctg593□ctg1087□WAG-1O16  
ctg183□ctg593□ctg1087□WAG-21H6  
ctg183□ctg593□ctg1087□WAG-89G19  
ctg183□ctg593□ctg1087□WAG-93O18  
ctg183□ctg593□ctg1087□WAG-94M17  
ctg183□ctg593□ctg1087□WAG-99B8  
ctg183□ctg593□ctg1087□WAG-111E13  
ctg183□ctg593□ctg1087□WAG-112D7  
ctg183□ctg593□ctg1935□WAG-2A18  
ctg183□ctg593□ctg1935□WAG-3N23  
ctg183□ctg593□ctg1935□WAG-69O16  
ctg183□ctg593□ctg1935□WAG-80E4  
ctg183□ctg593□ctg1935□WAG-92L20  
ctg183□ctg593□ctg1935□WAG-112J13  
ctg183□ctg593□ctg3351□WAG-17C15  
ctg183□ctg593□ctg3351□WAG-47B17  
ctg183□ctg593□ctg3351□WAG-121K9  
ctg183□ctg593□ctg4895□WAG-91F2  
ctg183□ctg593□ctg4895□WAG-100B10  
ctg1830□ctg3929□□WAG-34D9  
ctg1830□ctg3929□ctg5708□WAG-108L7  
ctg1830□ctg3929□ctg5708□WAG-121C20  
ctg1830□ctg6002□□WAG-33H18  
ctg1830□ctg6002□□WAG-72J15  
ctg1830□ctg6004□□WAG-59E14  
ctg1830□ctg6004□□WAG-68O18  
ctg1831□ctg3711□ctg3923□WAG-45M11  
ctg1831□ctg3711□ctg3923□WAG-46H14  
ctg1831□ctg3711□ctg3923□WAG-100C7  
ctg1831□ctg4414□□WAG-65P23  
ctg1831□ctg4414□ctg6682□WAG-3F4  
ctg1831□ctg4414□ctg6682□WAG-100J21  
ctg1832□ctg3426□□WAG-110H17  
ctg1832□ctg3426□ctg3534□WAG-84J16  
ctg1832□ctg3426□ctg3534□WAG-129G21  
ctg1833□□□WAG-13A14  
ctg1833□ctg6037□□WAG-18O11  
ctg1833□ctg6037□□WAG-53M3  
ctg1833□ctg6321□□WAG-4B20  
ctg1833□ctg6321□□WAG-20C20

ctg1834□□□WAG-100O23  
ctg1834□ctg3429□ctg3537□WAG-63M7  
ctg1834□ctg3429□ctg3537□WAG-95K22  
ctg1834□ctg3429□ctg3537□WAG-113A19  
ctg1835□□□WAG-42I17  
ctg1835□□□WAG-112J10  
ctg1835□ctg5046□ctg5564□WAG-I2  
ctg1835□ctg5046□ctg5564□WAG-M12  
ctg1835□ctg6143□□WAG-45K6  
ctg1835□ctg6143□□WAG-124E16  
ctg1836□ctg3444□ctg3557□WAG-43D19  
ctg1836□ctg3444□ctg3557□WAG-56C3  
ctg1836□ctg3444□ctg3557□WAG-88I9  
ctg1837□ctg3445□ctg3558□WAG-24B16  
ctg1837□ctg3445□ctg3558□WAG-76J15  
ctg1837□ctg3445□ctg3558□WAG-100P17  
ctg1838□□□WAG-124B5  
ctg1838□ctg4034□ctg4293□WAG-70M3  
ctg1838□ctg4034□ctg4293□WAG-87H24  
ctg1839□ctg3447□□WAG-28M5  
ctg1839□ctg3447□ctg4294□WAG-15C10  
ctg1839□ctg3447□ctg4294□WAG-83J16  
ctg184□□□WAG-25P18  
ctg184□ctg490□□WAG-73I24  
ctg184□ctg490□ctg1228□WAG-14E3  
ctg184□ctg490□ctg1228□WAG-53H16  
ctg184□ctg490□ctg1228□WAG-73H1  
ctg184□ctg490□ctg1228□WAG-95I11  
ctg184□ctg490□ctg6264□WAG-45P16  
ctg184□ctg490□ctg6264□WAG-80O20  
ctg184□ctg980□ctg1434□WAG-8G18  
ctg184□ctg980□ctg1434□WAG-20F4  
ctg184□ctg980□ctg1434□WAG-22E3  
ctg184□ctg980□ctg1434□WAG-109J1  
ctg184□ctg980□ctg1434□WAG-119D7  
ctg184□ctg980□ctg2935□WAG-44F7  
ctg184□ctg980□ctg2935□WAG-86B14  
ctg184□ctg980□ctg2935□WAG-109N11  
ctg1840□□□WAG-37H2  
ctg1840□ctg3448□□WAG-24H9  
ctg1840□ctg3448□□WAG-48D6  
ctg1840□ctg3448□ctg6509□WAG-32D4  
ctg1840□ctg3448□ctg6509□WAG-83C17  
ctg1841□ctg3453□ctg3566□WAG-66L16  
ctg1841□ctg3453□ctg3566□WAG-86O8  
ctg1841□ctg3453□ctg3566□WAG-111B18  
ctg1842□ctg3455□ctg3572□WAG-31I4  
ctg1842□ctg3455□ctg3572□WAG-65M19  
ctg1842□ctg3455□ctg3572□WAG-101D5  
ctg1843□□□WAG-39C22  
ctg1843□ctg4044□□WAG-48M18  
ctg1843□ctg4044□ctg5964□WAG-75E12  
ctg1843□ctg4044□ctg5964□WAG-105L22  
ctg1844□□□WAG-10F14  
ctg1844□ctg4046□□WAG-57L21  
ctg1844□ctg4046□ctg5960□WAG-63E4



ctg1844□ctg4046□ctg5960□WAG-89I24  
ctg1845□ctg3456□□WAG-33H23  
ctg1845□ctg3456□ctg4529□WAG-40B21  
ctg1845□ctg3456□ctg4529□WAG-72N10  
ctg1846□ctg3462□ctg3583□WAG-26F24  
ctg1846□ctg3462□ctg3583□WAG-93D7  
ctg1846□ctg3462□ctg3583□WAG-112E4  
ctg1847□□□WAG-21P24  
ctg1847□ctg4179□□WAG-8L1  
ctg1847□ctg4179□□WAG-21J2  
ctg1847□ctg4179□ctg6540□WAG-98F1  
ctg1847□ctg4179□ctg6540□WAG-101F15  
ctg1848□ctg4803□□WAG-54K4  
ctg1848□ctg4803□□WAG-56C2  
ctg1848□ctg4803□□WAG-63B19  
ctg1848□ctg6291□□WAG-25M13  
ctg1848□ctg6291□□WAG-97B13  
ctg1849□ctg3465□□WAG-39J20  
ctg1849□ctg3465□□WAG-83K17  
ctg1849□ctg3465□□WAG-111I15  
ctg1849□ctg3465□□WAG-117N10  
ctg185□□□WAG-49J10  
ctg185□□□WAG-62A23  
ctg185□ctg2942□ctg2914□WAG-6O18  
ctg185□ctg2942□ctg2914□WAG-119B23  
ctg185□ctg2942□ctg2914□WAG-119L21  
ctg185□ctg695□□WAG-78J7  
ctg185□ctg695□ctg1381□WAG-23E14  
ctg185□ctg695□ctg1381□WAG-37N17  
ctg185□ctg695□ctg1381□WAG-44B23  
ctg185□ctg695□ctg1381□WAG-58F5  
ctg185□ctg695□ctg1381□WAG-64D22  
ctg185□ctg695□ctg1388□WAG-A22  
ctg185□ctg695□ctg1388□WAG-22D2  
ctg185□ctg695□ctg1388□WAG-61O12  
ctg185□ctg695□ctg1388□WAG-95J16  
ctg185□ctg695□ctg1388□WAG-103M4  
ctg185□ctg695□ctg1388□WAG-119F9  
ctg185□ctg695□ctg686□WAG-16J18  
ctg185□ctg695□ctg686□WAG-18N19  
ctg185□ctg695□ctg686□WAG-19E5  
ctg185□ctg695□ctg686□WAG-19P6  
ctg185□ctg695□ctg686□WAG-41P11  
ctg185□ctg695□ctg686□WAG-63A3  
ctg185□ctg695□ctg686□WAG-69M21  
ctg185□ctg695□ctg686□WAG-77N3  
ctg185□ctg695□ctg686□WAG-105J22  
ctg185□ctg695□ctg686□WAG-121M7  
ctg1850□□□WAG-96K6  
ctg1850□ctg3466□□WAG-15E6  
ctg1850□ctg3466□□WAG-18I8  
ctg1850□ctg3466□□WAG-90C5  
ctg1850□ctg3466□□WAG-91O19  
ctg1850□ctg3466□□WAG-105B10  
ctg1850□ctg3466□□WAG-122L7  
ctg1851□□□WAG-35P13

ctg1851□ctg4065□□WAG-95A20  
ctg1851□ctg4065□ctg5653□WAG-87N13  
ctg1851□ctg4065□ctg5653□WAG-124P12  
ctg1852□□□WAG-38O18  
ctg1852□□□WAG-66L24  
ctg1852□ctg3552□ctg3711□WAG-21D22  
ctg1852□ctg3552□ctg3711□WAG-33G1  
ctg1852□ctg3552□ctg3711□WAG-45H18  
ctg1853□ctg3467□□WAG-53L4  
ctg1853□ctg3467□ctg4670□WAG-55N10  
ctg1853□ctg3467□ctg4670□WAG-110G10  
ctg1854□ctg3469□□WAG-110J10  
ctg1854□ctg3469□ctg4686□WAG-53K1  
ctg1854□ctg3469□ctg4686□WAG-89M5  
ctg1854□ctg3469□ctg5639□WAG-82I5  
ctg1854□ctg3469□ctg5639□WAG-91H1  
ctg1855□□□WAG-77A14  
ctg1855□ctg4190□□WAG-22F8  
ctg1855□ctg4190□ctg5612□WAG-24I5  
ctg1855□ctg4190□ctg5612□WAG-68M22  
ctg1856□□□WAG-10N18  
ctg1856□□□WAG-65L2  
ctg1856□□□WAG-75P7  
ctg1856□□□WAG-120L14  
ctg1856□ctg4191□□WAG-23K22  
ctg1856□ctg4191□ctg5892□WAG-61P9  
ctg1856□ctg4191□ctg5892□WAG-108M24  
ctg1857□ctg3472□□WAG-84D2  
ctg1857□ctg3472□ctg4533□WAG-60C7  
ctg1857□ctg3472□ctg4533□WAG-113I8  
ctg1858□ctg3475□□WAG-86A11  
ctg1858□ctg3475□ctg4562□WAG-16D6  
ctg1858□ctg3475□ctg4562□WAG-58D14  
ctg1859□ctg4195□□WAG-29C7  
ctg1859□ctg4195□□WAG-59D8  
ctg1859□ctg4195□ctg6051□WAG-65A17  
ctg1859□ctg4195□ctg6051□WAG-117I11  
ctg186□ctg491□□WAG-92C19  
ctg186□ctg491□□WAG-103H4  
ctg186□ctg491□ctg5052□WAG-25M14  
ctg186□ctg491□ctg5052□WAG-117L2  
ctg186□ctg491□ctg523□WAG-8J6  
ctg186□ctg491□ctg523□WAG-23D2  
ctg186□ctg491□ctg523□WAG-25B16  
ctg186□ctg491□ctg523□WAG-32O1  
ctg186□ctg491□ctg523□WAG-42G1  
ctg186□ctg491□ctg523□WAG-80K18  
ctg186□ctg491□ctg523□WAG-104M7  
ctg1860□□□WAG-99I5  
ctg1860□ctg3476□ctg3597□WAG-2C19  
ctg1860□ctg3476□ctg3597□WAG-96G18  
ctg1860□ctg3476□ctg3597□WAG-126K6  
ctg1861□□□WAG-9E15  
ctg1861□ctg4213□□WAG-38B1  
ctg1861□ctg4213□□WAG-44I14  
ctg1861□ctg4213□□WAG-120N2

ctg1861□ctg6348□□WAG-70N24  
ctg1861□ctg6348□□WAG-73G14  
ctg1862□ctg3483□□WAG-84M4  
ctg1862□ctg3483□□WAG-114N16  
ctg1862□ctg3483□ctg4704□WAG-96K4  
ctg1862□ctg3483□ctg4704□WAG-103I22  
ctg1863□□□WAG-120F6  
ctg1863□ctg3484□□WAG-106N1  
ctg1863□ctg3484□ctg4594□WAG-95O7  
ctg1863□ctg3484□ctg4594□WAG-104I5  
ctg1864□ctg3487□□WAG-105N23  
ctg1864□ctg3487□ctg4573□WAG-50F10  
ctg1864□ctg3487□ctg4573□WAG-126B7  
ctg1865□ctg3656□ctg3852□WAG-57C23  
ctg1865□ctg3656□ctg3852□WAG-77M19  
ctg1865□ctg3656□ctg3852□WAG-86M17  
ctg1865□ctg6050□□WAG-80H4  
ctg1865□ctg6050□□WAG-83N7  
ctg1866□ctg3664□□WAG-16E5  
ctg1866□ctg3664□ctg5004□WAG-78D23  
ctg1866□ctg3664□ctg5004□WAG-111B20  
ctg1866□ctg3664□ctg6710□WAG-33J16  
ctg1866□ctg3664□ctg6710□WAG-128G12  
ctg1867□□□WAG-2I22  
ctg1867□□□WAG-42I1  
ctg1867□ctg5686□□WAG-2M10  
ctg1867□ctg5686□□WAG-105P7  
ctg1867□ctg6254□□WAG-45E11  
ctg1867□ctg6254□□WAG-99N9  
ctg1868□ctg4098□□WAG-38C2  
ctg1868□ctg4098□ctg6212□WAG-27B15  
ctg1868□ctg4098□ctg6212□WAG-76F1  
ctg1868□ctg5838□□WAG-16B11  
ctg1868□ctg5838□□WAG-16P13  
ctg1869□□□WAG-27M7  
ctg1869□□□WAG-127C17  
ctg1869□ctg4102□□WAG-67J10  
ctg1869□ctg4102□ctg5134□WAG-15G16  
ctg1869□ctg4102□ctg5134□WAG-84H22  
ctg1869□ctg6292□□WAG-78L7  
ctg1869□ctg6292□□WAG-96H19  
ctg187□ctg511□□WAG-104I19  
ctg187□ctg511□ctg3875□WAG-5E17  
ctg187□ctg511□ctg3875□WAG-61K12  
ctg187□ctg511□ctg3875□WAG-127N7  
ctg187□ctg511□ctg4226□WAG-86J12  
ctg187□ctg511□ctg4226□WAG-121I21  
ctg187□ctg511□ctg4226□WAG-126B13  
ctg187□ctg511□ctg832□WAG-11B17  
ctg187□ctg511□ctg832□WAG-17J24  
ctg187□ctg511□ctg832□WAG-33F21  
ctg187□ctg511□ctg832□WAG-45M9  
ctg187□ctg511□ctg832□WAG-70M6  
ctg187□ctg511□ctg832□WAG-122B13  
ctg1870□ctg3491□ctg4669□WAG-111K8  
ctg1870□ctg3491□ctg4669□WAG-129G1

ctg1870□ctg3491□ctg6381□WAG-9N4  
ctg1870□ctg3491□ctg6381□WAG-96D21  
ctg1871□ctg3496□□WAG-92E22  
ctg1871□ctg3496□□WAG-130M7  
ctg1871□ctg3496□ctg6692□WAG-86I11  
ctg1871□ctg3496□ctg6692□WAG-98L11  
ctg1872□□□WAG-60C17  
ctg1872□ctg4235□□WAG-21D9  
ctg1872□ctg4235□ctg5803□WAG-69J14  
ctg1872□ctg4235□ctg5803□WAG-73C11  
ctg1873□□□WAG-34C5  
ctg1873□ctg3497□□WAG-119C4  
ctg1873□ctg3497□ctg4581□WAG-5B14  
ctg1873□ctg3497□ctg4581□WAG-5G13  
ctg1874□ctg4262□ctg4460□WAG-11J20  
ctg1874□ctg4262□ctg4460□WAG-21B7  
ctg1874□ctg4262□ctg4460□WAG-61K5  
ctg1874□ctg6537□□WAG-2H11  
ctg1874□ctg6537□□WAG-64A12  
ctg1875□□□WAG-32B9  
ctg1875□ctg4105□□WAG-78N1  
ctg1875□ctg4105□ctg5768□WAG-18N21  
ctg1875□ctg4105□ctg5768□WAG-55L13  
ctg1876□ctg3500□□WAG-9K8  
ctg1876□ctg3500□□WAG-81O2  
ctg1876□ctg3500□□WAG-82E13  
ctg1876□ctg3500□□WAG-94K19  
ctg1876□ctg3500□□WAG-101B7  
ctg1877□□□WAG-12P18  
ctg1877□ctg4108□ctg4373□WAG-37E11  
ctg1877□ctg4108□ctg4373□WAG-130D23  
ctg1878□ctg3504□ctg3633□WAG-30A6  
ctg1878□ctg3504□ctg3633□WAG-44I13  
ctg1878□ctg3504□ctg3633□WAG-73K10  
ctg1879□□□WAG-13B19  
ctg1879□□□WAG-81D18  
ctg1879□ctg4992□ctg5438□WAG-53B20  
ctg1879□ctg4992□ctg5438□WAG-108D6  
ctg1879□ctg5592□ctg6752□WAG-46A11  
ctg1879□ctg5592□ctg6752□WAG-61A12  
ctg188□□□WAG-70K22  
ctg188□ctg494□ctg406□WAG-21A5  
ctg188□ctg494□ctg406□WAG-67J17  
ctg188□ctg494□ctg406□WAG-81C7  
ctg188□ctg494□ctg406□WAG-89I16  
ctg188□ctg494□ctg406□WAG-90K6  
ctg188□ctg494□ctg406□WAG-122I16  
ctg188□ctg494□ctg406□WAG-128P7  
ctg1880□□□WAG-50M4  
ctg1880□ctg3845□□WAG-13N8  
ctg1880□ctg3845□ctg5454□WAG-65P22  
ctg1880□ctg3845□ctg5454□WAG-80P13  
ctg1881□□□WAG-58H2  
ctg1881□ctg4120□ctg4379□WAG-71L7  
ctg1881□ctg4120□ctg4379□WAG-71N7  
ctg1882□□□WAG-44N7

ctg1882□ctg4281□□WAG-30A19  
ctg1882□ctg4281□ctg6667□WAG-13B15  
ctg1882□ctg4281□ctg6667□WAG-17F9  
ctg1883□□□WAG-31L18  
ctg1883□□□WAG-54O9  
ctg1883□ctg4870□ctg5163□WAG-7E5  
ctg1883□ctg4870□ctg5163□WAG-53L2  
ctg1884□ctg3514□ctg3648□WAG-13I1  
ctg1884□ctg3514□ctg3648□WAG-81K10  
ctg1884□ctg3514□ctg3648□WAG-89L15  
ctg1885□ctg3515□ctg3650□WAG-67D19  
ctg1885□ctg3515□ctg3650□WAG-71O14  
ctg1885□ctg3515□ctg3650□WAG-100G9  
ctg1886□ctg3516□ctg3652□WAG-57L2  
ctg1886□ctg3516□ctg3652□WAG-61C11  
ctg1886□ctg3516□ctg3652□WAG-104C9  
ctg1887□□□WAG-1A6  
ctg1887□ctg3518□□WAG-89M19  
ctg1887□ctg3518□ctg3654□WAG-21A23  
ctg1887□ctg3518□ctg3654□WAG-25K15  
ctg1887□ctg3518□ctg3654□WAG-32N15  
ctg1888□ctg5008□ctg5481□WAG-96D1  
ctg1888□ctg5008□ctg5481□WAG-114B7  
ctg1888□ctg5746□□WAG-16C19  
ctg1888□ctg5746□□WAG-129J21  
ctg1888□ctg6362□□WAG-24M11  
ctg1888□ctg6362□□WAG-106N2  
ctg1889□□□WAG-41I6  
ctg1889□ctg4187□□WAG-62P23  
ctg1889□ctg4187□ctg5503□WAG-95D17  
ctg1889□ctg4187□ctg5503□WAG-99L7  
ctg189□□□WAG-49G5  
ctg189□ctg496□□WAG-95H14  
ctg189□ctg496□ctg513□WAG-11I22  
ctg189□ctg496□ctg513□WAG-18F14  
ctg189□ctg496□ctg513□WAG-28E9  
ctg189□ctg496□ctg513□WAG-52E16  
ctg189□ctg496□ctg513□WAG-57I6  
ctg189□ctg496□ctg513□WAG-58P15  
ctg189□ctg496□ctg513□WAG-78D3  
ctg189□ctg496□ctg513□WAG-87F8  
ctg189□ctg496□ctg513□WAG-89H3  
ctg189□ctg496□ctg513□WAG-117I4  
ctg1890□□□WAG-78H10  
ctg1890□ctg4135□□WAG-127G20  
ctg1890□ctg4135□ctg5398□WAG-79M14  
ctg1890□ctg4135□ctg5398□WAG-92L4  
ctg1891□ctg3823□ctg4081□WAG-22C16  
ctg1891□ctg3823□ctg4081□WAG-48C15  
ctg1891□ctg3823□ctg4081□WAG-54E1  
ctg1891□ctg4386□ctg4559□WAG-71D15  
ctg1891□ctg4386□ctg4559□WAG-78K19  
ctg1892□ctg3525□ctg3664□WAG-15G5  
ctg1892□ctg3525□ctg3664□WAG-79D12  
ctg1892□ctg3525□ctg3664□WAG-104F22  
ctg1893□□□WAG-30D14

ctg1893□ctg4604□ctg4763□WAG-121N12  
ctg1893□ctg4604□ctg4763□WAG-124M9  
ctg1893□ctg6010□□WAG-16G13  
ctg1893□ctg6010□□WAG-23D1  
ctg1894□□□WAG-51H6  
ctg1894□□□WAG-60I20  
ctg1894□ctg4296□ctg4490□WAG-62P19  
ctg1894□ctg4296□ctg4490□WAG-84D8  
ctg1895□□□WAG-73M10  
ctg1895□ctg4000□ctg4275□WAG-12H23  
ctg1895□ctg4000□ctg4275□WAG-83J13  
ctg1895□ctg4000□ctg4275□WAG-100P12  
ctg1896□□□WAG-95C9  
ctg1896□ctg4136□ctg4392□WAG-121K6  
ctg1896□ctg4136□ctg4392□WAG-121L7  
ctg1897□ctg3528□□WAG-48O9  
ctg1897□ctg3528□□WAG-74N7  
ctg1897□ctg3528□ctg5054□WAG-80B18  
ctg1897□ctg3528□ctg5054□WAG-115J11  
ctg1898□ctg4140□□WAG-38E2  
ctg1898□ctg4140□ctg5841□WAG-105B9  
ctg1898□ctg4140□ctg5841□WAG-121H11  
ctg1898□ctg5393□ctg6370□WAG-85G18  
ctg1898□ctg5393□ctg6370□WAG-108A1  
ctg1899□□□WAG-1J1  
ctg1899□ctg4141□ctg5843□WAG-117F22  
ctg1899□ctg4141□ctg5843□WAG-123O3  
ctg1899□ctg4141□ctg6221□WAG-4A20  
ctg1899□ctg4141□ctg6221□WAG-26D5  
ctg1899□ctg5074□ctg5623□WAG-60J2  
ctg1899□ctg5074□ctg5623□WAG-61K24  
ctg19□ctg79□ctg58□WAG-8D20  
ctg19□ctg79□ctg58□WAG-13L9  
ctg19□ctg79□ctg58□WAG-14G14  
ctg19□ctg79□ctg58□WAG-18D18  
ctg19□ctg79□ctg58□WAG-21D10  
ctg19□ctg79□ctg58□WAG-104H18  
ctg19□ctg79□ctg58□WAG-106I14  
ctg19□ctg79□ctg58□WAG-110J24  
ctg19□ctg79□ctg58□WAG-110N4  
ctg19□ctg79□ctg58□WAG-112E20  
ctg19□ctg79□ctg58□WAG-123J7  
ctg19□ctg79□ctg58□WAG-126I6  
ctg19□ctg79□ctg58□WAG-127I5  
ctg190□ctg497□ctg408□WAG-7P1  
ctg190□ctg497□ctg408□WAG-20G8  
ctg190□ctg497□ctg408□WAG-26H23  
ctg190□ctg497□ctg408□WAG-71H18  
ctg190□ctg497□ctg408□WAG-76L3  
ctg190□ctg497□ctg408□WAG-111P17  
ctg1900□ctg3529□□WAG-119L3  
ctg1900□ctg3529□ctg3670□WAG-9D6  
ctg1900□ctg3529□ctg3670□WAG-26N8  
ctg1900□ctg3529□ctg3670□WAG-96L9  
ctg1901□ctg3531□ctg3673□WAG-57E15  
ctg1901□ctg3531□ctg3673□WAG-61H18

ctg1901□ctg3531□ctg3673□WAG-66P18  
ctg1902□□□WAG-128A23  
ctg1902□ctg4148□□WAG-110M7  
ctg1902□ctg4148□ctg6181□WAG-33O10  
ctg1902□ctg4148□ctg6181□WAG-97I3  
ctg1903□ctg3536□ctg3678□WAG-40H3  
ctg1903□ctg3536□ctg3678□WAG-73K15  
ctg1903□ctg3536□ctg3678□WAG-82A17  
ctg1904□□□WAG-77C13  
ctg1904□ctg5045□ctg5563□WAG-18N24  
ctg1904□ctg5045□ctg5563□WAG-76J11  
ctg1904□ctg6015□□WAG-8P24  
ctg1904□ctg6015□□WAG-55O12  
ctg1905□ctg3538□□WAG-23F6  
ctg1905□ctg3538□ctg4801□WAG-102J16  
ctg1905□ctg3538□ctg4801□WAG-130J19  
ctg1906□ctg3539□□WAG-95C6  
ctg1906□ctg3539□ctg4808□WAG-10G11  
ctg1906□ctg3539□ctg4808□WAG-105H12  
ctg1907□ctg3540□ctg3684□WAG-11I23  
ctg1907□ctg3540□ctg3684□WAG-91L18  
ctg1908□ctg3541□ctg3685□WAG-60P2  
ctg1908□ctg3541□ctg3685□WAG-70G14  
ctg1909□□□WAG-92O16  
ctg1909□ctg4041□ctg4308□WAG-32N6  
ctg1909□ctg4041□ctg4308□WAG-50A21  
ctg1909□ctg4041□ctg4308□WAG-103K22  
ctg191□ctg1063□ctg1186□WAG-67O15  
ctg191□ctg1063□ctg1186□WAG-83L2  
ctg191□ctg1063□ctg1186□WAG-103L2  
ctg191□ctg1063□ctg1186□WAG-125M6  
ctg191□ctg1063□ctg6086□WAG-38I5  
ctg191□ctg1063□ctg6086□WAG-61A8  
ctg191□ctg5134□ctg5771□WAG-87N8  
ctg191□ctg5134□ctg5771□WAG-120E20  
ctg191□ctg729□□WAG-84E23  
ctg191□ctg729□ctg929□WAG-16H7  
ctg191□ctg729□ctg929□WAG-28A23  
ctg191□ctg729□ctg929□WAG-35F14  
ctg191□ctg729□ctg929□WAG-66C6  
ctg191□ctg729□ctg929□WAG-68F8  
ctg191□ctg729□ctg929□WAG-109A11  
ctg191□ctg729□ctg929□WAG-118M24  
ctg191□ctg729□ctg929□WAG-125F2  
ctg1910□□□WAG-64A8  
ctg1910□ctg4164□□WAG-57O15  
ctg1910□ctg4164□ctg6505□WAG-40B12  
ctg1910□ctg4164□ctg6505□WAG-54F3  
ctg1911□ctg3550□ctg3702□WAG-43I21  
ctg1911□ctg3550□ctg3702□WAG-103L22  
ctg1911□ctg3550□ctg3702□WAG-105C6  
ctg1912□ctg3554□□WAG-70A13  
ctg1912□ctg3554□ctg4813□WAG-17H22  
ctg1912□ctg3554□ctg4813□WAG-40C17  
ctg1913□□□WAG-31P13  
ctg1913□ctg3555□ctg3715□WAG-90E20

ctg1913□ctg3555□ctg3715□WAG-112L3  
ctg1914□□□WAG-108K21  
ctg1914□ctg3557□ctg3721□WAG-9G21  
ctg1914□ctg3557□ctg3721□WAG-40O20  
ctg1914□ctg3557□ctg3721□WAG-87O4  
ctg1915□□□WAG-50F13  
ctg1915□ctg3970□□WAG-11J12  
ctg1915□ctg3970□□WAG-108F1  
ctg1915□ctg3970□□WAG-124I13  
ctg1915□ctg3970□ctg5451□WAG-79I6  
ctg1915□ctg3970□ctg5451□WAG-83A2  
ctg1916□□□WAG-96G10  
ctg1916□□□WAG-113C23  
ctg1916□ctg4182□□WAG-41P22  
ctg1916□ctg4182□ctg6554□WAG-72J21  
ctg1916□ctg4182□ctg6554□WAG-86H16  
ctg1916□ctg4301□ctg4496□WAG-20H8  
ctg1916□ctg4301□ctg4496□WAG-87B22  
ctg1916□ctg5706□□WAG-24J1  
ctg1916□ctg5706□□WAG-46E2  
ctg1917□ctg3565□ctg3733□WAG-55A10  
ctg1917□ctg3565□ctg3733□WAG-76G17  
ctg1917□ctg3565□ctg3733□WAG-81F21  
ctg1918□ctg3566□ctg3734□WAG-66I21  
ctg1918□ctg3566□ctg3734□WAG-69K15  
ctg1918□ctg3566□ctg3734□WAG-73M7  
ctg1919□ctg3567□ctg3737□WAG-27F7  
ctg1919□ctg3567□ctg3737□WAG-87M17  
ctg1919□ctg3567□ctg3737□WAG-112J22  
ctg192□□□WAG-12P2  
ctg192□□□WAG-111J5  
ctg192□ctg775□ctg3176□WAG-55L18  
ctg192□ctg775□ctg3176□WAG-128F4  
ctg192□ctg775□ctg820□WAG-2P5  
ctg192□ctg775□ctg820□WAG-8A12  
ctg192□ctg775□ctg820□WAG-58C7  
ctg192□ctg775□ctg820□WAG-64C3  
ctg192□ctg775□ctg820□WAG-114B12  
ctg1920□ctg3568□ctg3739□WAG-26B13  
ctg1920□ctg3568□ctg3739□WAG-77M16  
ctg1920□ctg3568□ctg3739□WAG-101J16  
ctg1921□□□WAG-120A14  
ctg1921□ctg3901□□WAG-115I11  
ctg1921□ctg3901□ctg5618□WAG-107G1  
ctg1921□ctg3901□ctg5618□WAG-128L16  
ctg1922□□□WAG-2P9  
ctg1922□ctg3679□ctg3877□WAG-22M24  
ctg1922□ctg3679□ctg3877□WAG-38F14  
ctg1922□ctg3679□ctg3877□WAG-44A17  
ctg1923□ctg4025□□WAG-109O14  
ctg1923□ctg4025□ctg4532□WAG-49E11  
ctg1923□ctg4025□ctg4532□WAG-78I3  
ctg1923□ctg4025□ctg4532□WAG-119P6  
ctg1924□□□WAG-110I21  
ctg1924□ctg4315□ctg4508□WAG-30N5  
ctg1924□ctg4315□ctg4508□WAG-70H10



ctg1925□□□WAG-86N20  
ctg1925□ctg4361□ctg4542□WAG-46J17  
ctg1925□ctg4361□ctg4542□WAG-64F8  
ctg1925□ctg6499□□WAG-23L11  
ctg1925□ctg6499□□WAG-87F3  
ctg1926□□□WAG-27B11  
ctg1926□□□WAG-58J15  
ctg1926□ctg3574□ctg3747□WAG-23I21  
ctg1926□ctg3574□ctg3747□WAG-36D10  
ctg1926□ctg3574□ctg3747□WAG-102P14  
ctg1927□ctg3575□ctg3748□WAG-19M24  
ctg1927□ctg3575□ctg3748□WAG-60E7  
ctg1927□ctg3575□ctg3748□WAG-95O24  
ctg1928□ctg3576□ctg3749□WAG-62N20  
ctg1928□ctg3576□ctg3749□WAG-77L18  
ctg1928□ctg3576□ctg3749□WAG-114E11  
ctg1929□ctg3581□□WAG-56D23  
ctg1929□ctg3581□ctg4593□WAG-48G10  
ctg1929□ctg3581□ctg4593□WAG-111B7  
ctg193□□□WAG-1L16  
ctg193□□□WAG-20B14  
ctg193□□□WAG-53I14  
ctg193□ctg608□□WAG-16M6  
ctg193□ctg608□□WAG-35O3  
ctg193□ctg608□ctg1682□WAG-4L22  
ctg193□ctg608□ctg1682□WAG-15K12  
ctg193□ctg608□ctg1682□WAG-38K16  
ctg193□ctg608□ctg1682□WAG-87B12  
ctg193□ctg608□ctg2585□WAG-1D15  
ctg193□ctg608□ctg2585□WAG-18O3  
ctg193□ctg608□ctg2585□WAG-126H7  
ctg193□ctg608□ctg3064□WAG-4H14  
ctg193□ctg608□ctg3064□WAG-107N19  
ctg193□ctg608□ctg3064□WAG-118I16  
ctg193□ctg608□ctg6423□WAG-18O15  
ctg193□ctg608□ctg6423□WAG-38N3  
ctg1930□□□WAG-41H20  
ctg1930□□□WAG-61M22  
ctg1930□ctg4363□□WAG-29M16  
ctg1930□ctg4363□□WAG-39E10  
ctg1930□ctg4363□□WAG-109K16  
ctg1930□ctg4363□□WAG-119J20  
ctg1930□ctg4363□□WAG-120K3  
ctg1931□ctg3588□ctg3761□WAG-65P7  
ctg1931□ctg3588□ctg3761□WAG-72E11  
ctg1931□ctg3588□ctg3761□WAG-123K21  
ctg1932□ctg3591□□WAG-30B5  
ctg1932□ctg3591□ctg4860□WAG-68E15  
ctg1932□ctg3591□ctg4860□WAG-125B2  
ctg1933□□□WAG-97J4  
ctg1933□ctg3592□□WAG-94L6  
ctg1933□ctg3592□ctg4861□WAG-62C19  
ctg1933□ctg3592□ctg4861□WAG-124C8  
ctg1934□ctg3593□ctg3766□WAG-109M3  
ctg1934□ctg3593□ctg3766□WAG-118B14  
ctg1935□ctg3594□ctg3768□WAG-86A12

ctg1935□ctg3594□ctg3768□WAG-119H24  
ctg1936□□□WAG-69G16  
ctg1936□ctg4367□□WAG-20D20  
ctg1936□ctg4367□ctg6528□WAG-84N6  
ctg1936□ctg4367□ctg6528□WAG-127P21  
ctg1937□□□WAG-79G22  
ctg1937□ctg4389□ctg4566□WAG-38I21  
ctg1937□ctg4389□ctg4566□WAG-109I3  
ctg1938□□□WAG-125I15  
ctg1938□ctg4218□□WAG-108E4  
ctg1938□ctg4218□ctg5932□WAG-34N15  
ctg1938□ctg4218□ctg5932□WAG-38K9  
ctg1938□ctg5792□□WAG-98L10  
ctg1938□ctg5792□□WAG-113D21  
ctg1939□□□WAG-118O24  
ctg1939□ctg4222□□WAG-11O21  
ctg1939□ctg4222□ctg6110□WAG-45P12  
ctg1939□ctg4222□ctg6110□WAG-104D12  
ctg1939□ctg4760□ctg4968□WAG-84N16  
ctg1939□ctg4760□ctg4968□WAG-123C23  
ctg194□□□WAG-53P17  
ctg194□□□WAG-93D16  
ctg194□ctg6197□□WAG-47M16  
ctg194□ctg6197□□WAG-101K4  
ctg194□ctg787□ctg639□WAG-26C19  
ctg194□ctg787□ctg639□WAG-51I7  
ctg194□ctg787□ctg639□WAG-62M6  
ctg194□ctg787□ctg639□WAG-64I22  
ctg194□ctg787□ctg639□WAG-69E10  
ctg194□ctg787□ctg639□WAG-108H18  
ctg1940□ctg4172□ctg4408□WAG-100L8  
ctg1940□ctg4172□ctg4408□WAG-118L22  
ctg1940□ctg5188□ctg5895□WAG-33E1  
ctg1940□ctg5188□ctg5895□WAG-105E16  
ctg1941□ctg3596□□WAG-8J3  
ctg1941□ctg3596□ctg4661□WAG-47D12  
ctg1941□ctg3596□ctg4661□WAG-130A1  
ctg1942□ctg3600□□WAG-21H15  
ctg1942□ctg3600□ctg4692□WAG-8K16  
ctg1942□ctg3600□ctg4692□WAG-11A2  
ctg1943□□□WAG-60A24  
ctg1943□□□WAG-87F9  
ctg1943□ctg5061□ctg5593□WAG-60J4  
ctg1943□ctg5061□ctg5593□WAG-69N3  
ctg1944□ctg3607□ctg3786□WAG-40D15  
ctg1944□ctg3607□ctg3786□WAG-110B9  
ctg1944□ctg3607□ctg3786□WAG-127M12  
ctg1945□ctg3608□ctg3789□WAG-33C23  
ctg1945□ctg3608□ctg3789□WAG-71L2  
ctg1945□ctg3608□ctg3789□WAG-74I19  
ctg1946□□□WAG-72C4  
ctg1946□ctg4368□□WAG-60C6  
ctg1946□ctg4368□ctg6530□WAG-17E17  
ctg1946□ctg4368□ctg6530□WAG-123L5  
ctg1947□ctg3612□□WAG-30K22  
ctg1947□ctg3612□□WAG-50O23

ctg1947□ctg3612□□WAG-54H6  
ctg1947□ctg3612□□WAG-96D20  
ctg1948□ctg4244□□WAG-63A10  
ctg1948□ctg4244□ctg4443□WAG-51E9  
ctg1948□ctg4244□ctg4443□WAG-128D16  
ctg1949□□□WAG-63F9  
ctg1949□ctg4142□□WAG-100C17  
ctg1949□ctg4142□ctg5702□WAG-111J12  
ctg1949□ctg4142□ctg5702□WAG-123F22  
ctg195□□□WAG-29L24  
ctg195□ctg2514□□WAG-23I9  
ctg195□ctg2514□ctg3139□WAG-36J12  
ctg195□ctg2514□ctg3139□WAG-103O12  
ctg195□ctg2514□ctg3139□WAG-122C8  
ctg195□ctg637□□WAG-35A13  
ctg195□ctg637□ctg520□WAG-17G8  
ctg195□ctg637□ctg520□WAG-28J16  
ctg195□ctg637□ctg520□WAG-86H22  
ctg195□ctg637□ctg520□WAG-88B6  
ctg195□ctg637□ctg520□WAG-99P4  
ctg195□ctg637□ctg520□WAG-106O6  
ctg195□ctg637□ctg520□WAG-114E2  
ctg1950□□□WAG-120A12  
ctg1950□ctg4249□ctg4450□WAG-50C23  
ctg1950□ctg4249□ctg4450□WAG-67D7  
ctg1951□□□WAG-72K24  
ctg1951□□□WAG-93N14  
ctg1951□□□WAG-97K5  
ctg1951□□□WAG-116C9  
ctg1951□ctg6304□□WAG-73I21  
ctg1951□ctg6304□□WAG-80P17  
ctg1952□ctg3617□ctg3799□WAG-9F19  
ctg1952□ctg3617□ctg3799□WAG-74N5  
ctg1952□ctg3617□ctg3799□WAG-101I13  
ctg1953□ctg3618□ctg3802□WAG-69J18  
ctg1953□ctg3618□ctg3802□WAG-127A3  
ctg1953□ctg3618□ctg3802□WAG-130E13  
ctg1954□ctg4415□□WAG-69H10  
ctg1954□ctg4415□□WAG-70N22  
ctg1954□ctg4415□ctg6285□WAG-39B4  
ctg1954□ctg4415□ctg6285□WAG-87C4  
ctg1955□□□WAG-90I16  
ctg1955□□□WAG-113L13  
ctg1955□□□WAG-119M15  
ctg1955□ctg5285□□WAG-39B1  
ctg1955□ctg5285□□WAG-99L8  
ctg1955□ctg5285□□WAG-127I6  
ctg1955□ctg5287□ctg6121□WAG-105M12  
ctg1955□ctg5287□ctg6121□WAG-108M5  
ctg1956□ctg3627□ctg3813□WAG-15A19  
ctg1956□ctg3627□ctg3813□WAG-64B21  
ctg1956□ctg3627□ctg3813□WAG-98N18  
ctg1957□ctg3628□ctg3816□WAG-36O9  
ctg1957□ctg3628□ctg3816□WAG-48C9  
ctg1957□ctg3628□ctg3816□WAG-85M16  
ctg1958□ctg3629□□WAG-30P1

ctg1958□ctg3629□ctg4663□WAG-96F2  
ctg1958□ctg3629□ctg4663□WAG-124N13  
ctg1959□□□WAG-20F12  
ctg1959□□□WAG-116O8  
ctg1959□ctg4279□□WAG-54J5  
ctg1959□ctg4279□ctg6652□WAG-42O19  
ctg1959□ctg4279□ctg6652□WAG-116N17  
ctg1959□ctg4728□ctg4920□WAG-110H11  
ctg1959□ctg4728□ctg4920□WAG-118G10  
ctg196□□□WAG-42A2  
ctg196□ctg505□□WAG-70D24  
ctg196□ctg505□ctg710□WAG-16O20  
ctg196□ctg505□ctg710□WAG-19C10  
ctg196□ctg505□ctg710□WAG-69O13  
ctg196□ctg505□ctg710□WAG-75I23  
ctg196□ctg505□ctg710□WAG-76D7  
ctg196□ctg505□ctg710□WAG-83E17  
ctg196□ctg505□ctg710□WAG-96B16  
ctg196□ctg505□ctg710□WAG-105K24  
ctg196□ctg505□ctg710□WAG-108A20  
ctg196□ctg505□ctg710□WAG-116B3  
ctg196□ctg505□ctg710□WAG-129E16  
ctg196□ctg966□□WAG-3B2  
ctg196□ctg966□□WAG-30M20  
ctg196□ctg966□□WAG-75O24  
ctg196□ctg966□ctg1406□WAG-7O7  
ctg196□ctg966□ctg1406□WAG-8K5  
ctg196□ctg966□ctg1406□WAG-14P22  
ctg196□ctg966□ctg1406□WAG-70L7  
ctg196□ctg966□ctg1406□WAG-85E5  
ctg196□ctg966□ctg1406□WAG-87B14  
ctg196□ctg966□ctg1406□WAG-108L5  
ctg196□ctg966□ctg2374□WAG-3G5  
ctg196□ctg966□ctg2374□WAG-11P3  
ctg196□ctg966□ctg2374□WAG-17A10  
ctg196□ctg966□ctg2374□WAG-40L16  
ctg196□ctg966□ctg2374□WAG-110M19  
ctg1960□□□WAG-18C5  
ctg1960□□□WAG-18F11  
ctg1960□□□WAG-18L1  
ctg1960□□□WAG-107L7  
ctg1960□ctg4280□□WAG-19D12  
ctg1960□ctg4280□ctg6798□WAG-51O9  
ctg1960□ctg4280□ctg6798□WAG-83L13  
ctg1961□ctg3630□ctg3820□WAG-3O5  
ctg1961□ctg3630□ctg3820□WAG-72G11  
ctg1961□ctg3630□ctg3820□WAG-90C19  
ctg1961□ctg5656□ctg6820□WAG-20C15  
ctg1961□ctg5656□ctg6820□WAG-124B11  
ctg1962□ctg3631□ctg3822□WAG-12G21  
ctg1962□ctg3631□ctg3822□WAG-63I16  
ctg1962□ctg3631□ctg3822□WAG-106M19  
ctg1963□ctg3632□ctg3823□WAG-55A21  
ctg1963□ctg3632□ctg3823□WAG-60D24  
ctg1963□ctg3632□ctg3823□WAG-117A22  
ctg1964□ctg3633□ctg3825□WAG-48J6

ctg1964□ctg3633□ctg3825□WAG-53N17  
ctg1964□ctg3633□ctg3825□WAG-61P12  
ctg1964□ctg4995□□WAG-73P24  
ctg1964□ctg4995□ctg5443□WAG-46D5  
ctg1964□ctg4995□ctg5443□WAG-93P8  
ctg1965□ctg3634□ctg3827□WAG-24D9  
ctg1965□ctg3634□ctg3827□WAG-40A20  
ctg1965□ctg3634□ctg3827□WAG-53B2  
ctg1966□ctg3638□□WAG-62H21  
ctg1966□ctg3638□ctg4938□WAG-33I11  
ctg1966□ctg3638□ctg4938□WAG-117O17  
ctg1967□ctg3640□ctg3830□WAG-35A4  
ctg1967□ctg3640□ctg3830□WAG-64J4  
ctg1968□□□WAG-53L16  
ctg1968□ctg4420□□WAG-81O21  
ctg1968□ctg4420□ctg6728□WAG-43E11  
ctg1968□ctg4420□ctg6728□WAG-112I12  
ctg1969□□□WAG-16K12  
ctg1969□□□WAG-21H22  
ctg1969□□□WAG-33M10  
ctg1969□ctg4287□□WAG-37P14  
ctg1969□ctg4287□ctg6232□WAG-68I5  
ctg1969□ctg4287□ctg6232□WAG-100A2  
ctg197□ctg676□□WAG-5C23  
ctg197□ctg676□□WAG-86L20  
ctg197□ctg676□ctg1001□WAG-10O12  
ctg197□ctg676□ctg1001□WAG-15H1  
ctg197□ctg676□ctg1001□WAG-16N20  
ctg197□ctg676□ctg1001□WAG-28C12  
ctg197□ctg676□ctg1001□WAG-40D4  
ctg197□ctg676□ctg1001□WAG-59P24  
ctg197□ctg676□ctg1001□WAG-68E12  
ctg197□ctg676□ctg1001□WAG-70M22  
ctg197□ctg676□ctg1001□WAG-92A21  
ctg197□ctg676□ctg1001□WAG-104J12  
ctg197□ctg676□ctg1001□WAG-119P9  
ctg197□ctg676□ctg1001□WAG-120N3  
ctg1970□□□WAG-127I16  
ctg1970□ctg4297□ctg4492□WAG-56E13  
ctg1970□ctg4297□ctg4492□WAG-74F8  
ctg1971□□□WAG-7M7  
ctg1971□□□WAG-69F6  
ctg1971□ctg4298□ctg4493□WAG-12F17  
ctg1971□ctg4298□ctg4493□WAG-50E24  
ctg1972□□□WAG-36D18  
ctg1972□ctg3648□□WAG-71H22  
ctg1972□ctg3648□ctg4760□WAG-17M1  
ctg1972□ctg3648□ctg4760□WAG-17P7  
ctg1973□ctg3650□ctg3840□WAG-24E22  
ctg1973□ctg3650□ctg3840□WAG-61G2  
ctg1973□ctg3650□ctg3840□WAG-74N23  
ctg1974□ctg3651□ctg3845□WAG-22E2  
ctg1974□ctg3651□ctg3845□WAG-44L19  
ctg1974□ctg3651□ctg3845□WAG-48H22  
ctg1975□□□WAG-O9  
ctg1975□ctg4401□□WAG-71B3

ctg1975□ctg4401□ctg6655□WAG-9O5  
ctg1975□ctg4401□ctg6655□WAG-38M7  
ctg1975□ctg6142□□WAG-39M13  
ctg1975□ctg6142□□WAG-52O7  
ctg1976□ctg4443□□WAG-71A16  
ctg1976□ctg4443□□WAG-95B15  
ctg1976□ctg4443□ctg6797□WAG-38J17  
ctg1976□ctg4443□ctg6797□WAG-83P4  
ctg1977□□□WAG-118E17  
ctg1977□ctg4153□□WAG-88P7  
ctg1977□ctg4153□ctg5833□WAG-54B9  
ctg1977□ctg4153□ctg5833□WAG-128A8  
ctg1978□□□WAG-40B18  
ctg1978□ctg4447□□WAG-95M2  
ctg1978□ctg4447□□WAG-96G7  
ctg1978□ctg4447□□WAG-106C9  
ctg1979□ctg4311□ctg4503□WAG-67L23  
ctg1979□ctg4311□ctg4503□WAG-113G14  
ctg1979□ctg5709□□WAG-10L17  
ctg1979□ctg5709□□WAG-99K3  
ctg198□ctg761□□WAG-6K19  
ctg198□ctg761□ctg997□WAG-32G1  
ctg198□ctg761□ctg997□WAG-45F22  
ctg198□ctg761□ctg997□WAG-51M1  
ctg198□ctg761□ctg997□WAG-54P2  
ctg198□ctg761□ctg997□WAG-86F14  
ctg198□ctg761□ctg997□WAG-104I23  
ctg198□ctg761□ctg997□WAG-114G8  
ctg198□ctg761□ctg997□WAG-119I18  
ctg198□ctg761□ctg997□WAG-124J13  
ctg198□ctg761□ctg997□WAG-129G24  
ctg1980□ctg3712□ctg3925□WAG-7L3  
ctg1980□ctg3712□ctg3925□WAG-15K5  
ctg1980□ctg3712□ctg3925□WAG-71J18  
ctg1980□ctg4536□ctg4671□WAG-28H4  
ctg1980□ctg4536□ctg4671□WAG-105F22  
ctg1981□□□WAG-8A5  
ctg1981□ctg4460□ctg4608□WAG-54C4  
ctg1981□ctg4460□ctg4608□WAG-110I8  
ctg1982□ctg3660□ctg3859□WAG-16A6  
ctg1982□ctg3660□ctg3859□WAG-20F21  
ctg1982□ctg3660□ctg3859□WAG-66M17  
ctg1983□ctg3661□ctg3860□WAG-10P18  
ctg1983□ctg3661□ctg3860□WAG-32O7  
ctg1983□ctg3661□ctg3860□WAG-61F15  
ctg1984□ctg3663□□WAG-95A21  
ctg1984□ctg3663□ctg4998□WAG-78O24  
ctg1984□ctg3663□ctg4998□WAG-90L15  
ctg1985□□□WAG-122C13  
ctg1985□ctg3669□□WAG-14A5  
ctg1985□ctg3669□ctg4404□WAG-80I22  
ctg1985□ctg3669□ctg4404□WAG-123O18  
ctg1985□ctg3669□ctg4404□WAG-128E18  
ctg1985□ctg3669□ctg4404□WAG-129C21  
ctg1986□□□WAG-43B17  
ctg1986□□□WAG-123N2

ctg1986□ctg4469□□WAG-108B20  
ctg1986□ctg4469□ctg6829□WAG-4H8  
ctg1986□ctg4469□ctg6829□WAG-92M6  
ctg1987□□□WAG-68C11  
ctg1987□□□WAG-79B6  
ctg1987□□□WAG-82I20  
ctg1987□ctg4472□□WAG-24B19  
ctg1987□ctg4472□□WAG-77E2  
ctg1987□ctg4472□□WAG-112B22  
ctg1988□□□WAG-52I23  
ctg1988□ctg3673□ctg3864□WAG-70P24  
ctg1988□ctg3673□ctg3864□WAG-78L13  
ctg1988□ctg3673□ctg3864□WAG-125A17  
ctg1989□□□WAG-120J1  
ctg1989□ctg4334□ctg4518□WAG-99I14  
ctg1989□ctg4334□ctg4518□WAG-118K3  
ctg199□ctg1603□ctg1837□WAG-55A19  
ctg199□ctg1603□ctg1837□WAG-65M24  
ctg199□ctg1603□ctg1837□WAG-91N21  
ctg199□ctg1603□ctg1837□WAG-111E10  
ctg199□ctg1603□ctg3495□WAG-23B7  
ctg199□ctg1603□ctg3495□WAG-38G8  
ctg199□ctg1603□ctg3495□WAG-102F3  
ctg199□ctg3510□ctg3638□WAG-84J9  
ctg199□ctg3510□ctg3638□WAG-109F9  
ctg199□ctg3544□ctg3692□WAG-13F21  
ctg199□ctg3544□ctg3692□WAG-19C3  
ctg199□ctg3544□ctg3692□WAG-24N19  
ctg199□ctg3544□ctg3692□WAG-76F21  
ctg199□ctg3771□□WAG-52D9  
ctg199□ctg3771□ctg4971□WAG-77L21  
ctg199□ctg3771□ctg4971□WAG-94N22  
ctg199□ctg723□□WAG-69K20  
ctg199□ctg723□□WAG-128N11  
ctg199□ctg723□ctg4151□WAG-52G2  
ctg199□ctg723□ctg4151□WAG-65B24  
ctg199□ctg723□ctg4151□WAG-87N14  
ctg199□ctg723□ctg4151□WAG-120P16  
ctg199□ctg723□ctg584□WAG-6C6  
ctg199□ctg723□ctg584□WAG-13D13  
ctg199□ctg723□ctg584□WAG-38G10  
ctg199□ctg723□ctg584□WAG-40D23  
ctg199□ctg723□ctg584□WAG-60C8  
ctg199□ctg723□ctg584□WAG-93J22  
ctg199□ctg723□ctg584□WAG-98B22  
ctg199□ctg723□ctg584□WAG-117D23  
ctg199□ctg723□ctg584□WAG-126E23  
ctg199□ctg723□ctg584□WAG-127I15  
ctg199□ctg723□ctg584□WAG-128O8  
ctg1990□□□WAG-104L24  
ctg1990□ctg4338□ctg4523□WAG-64F13  
ctg1990□ctg4338□ctg4523□WAG-81I10  
ctg1991□ctg4248□ctg4449□WAG-22M14  
ctg1991□ctg4248□ctg4449□WAG-72J24  
ctg1991□ctg5823□□WAG-28I4  
ctg1991□ctg5823□□WAG-83L17

ctg1992□ctg4478□□WAG-28C13  
ctg1992□ctg4478□□WAG-87D18  
ctg1992□ctg4478□□WAG-91A10  
ctg1992□ctg4478□□WAG-94O20  
ctg1993□ctg3675□ctg3867□WAG-8G8  
ctg1993□ctg3675□ctg3867□WAG-67C24  
ctg1993□ctg3675□ctg3867□WAG-107B15  
ctg1994□ctg3677□ctg3871□WAG-23J14  
ctg1994□ctg3677□ctg3871□WAG-89B16  
ctg1994□ctg3677□ctg3871□WAG-98B23  
ctg1995□ctg4425□□WAG-22N2  
ctg1995□ctg4425□□WAG-79G18  
ctg1995□ctg4425□ctg6743□WAG-79L15  
ctg1995□ctg4425□ctg6743□WAG-117F1  
ctg1996□□□WAG-62B6  
ctg1996□ctg3684□□WAG-4B14  
ctg1996□ctg3684□□WAG-26E2  
ctg1996□ctg3684□□WAG-89J5  
ctg1996□ctg3684□□WAG-126M5  
ctg1997□ctg3685□□WAG-L1  
ctg1997□ctg3685□□WAG-25C21  
ctg1997□ctg3685□ctg6814□WAG-16A20  
ctg1997□ctg3685□ctg6814□WAG-72L22  
ctg1998□□□WAG-2O7  
ctg1998□ctg4489□□WAG-2L15  
ctg1998□ctg4489□□WAG-50M11  
ctg1998□ctg4489□□WAG-111O11  
ctg1999□□□WAG-48J16  
ctg1999□□□WAG-117G4  
ctg1999□ctg4350□□WAG-1N17  
ctg1999□ctg4350□ctg6489□WAG-62D15  
ctg1999□ctg4350□ctg6489□WAG-63L9  
ctg2□□□WAG-47P9  
ctg2□ctg2285□ctg2190□WAG-38L23  
ctg2□ctg2285□ctg2190□WAG-104C3  
ctg2□ctg2285□ctg2190□WAG-119B18  
ctg20□ctg4317□ctg4511□WAG-17H18  
ctg20□ctg4317□ctg4511□WAG-25K7  
ctg20□ctg97□□WAG-38I2  
ctg20□ctg97□□WAG-61K8  
ctg20□ctg97□ctg129□WAG-9E23  
ctg20□ctg97□ctg129□WAG-11L20  
ctg20□ctg97□ctg129□WAG-19K4  
ctg20□ctg97□ctg129□WAG-47C10  
ctg20□ctg97□ctg129□WAG-52B10  
ctg20□ctg97□ctg129□WAG-70M5  
ctg20□ctg97□ctg129□WAG-93L18  
ctg20□ctg97□ctg129□WAG-98K1  
ctg20□ctg97□ctg129□WAG-102K11  
ctg20□ctg97□ctg129□WAG-103J24  
ctg20□ctg97□ctg129□WAG-106J1  
ctg20□ctg97□ctg129□WAG-109A14  
ctg20□ctg97□ctg129□WAG-121E15  
ctg200□□□WAG-33N24  
ctg200□ctg617□□WAG-13F14  
ctg200□ctg617□ctg667□WAG-23H18



ctg200□ctg617□ctg667□WAG-37C13  
ctg200□ctg617□ctg667□WAG-67N20  
ctg200□ctg617□ctg667□WAG-67P3  
ctg200□ctg617□ctg667□WAG-91N12  
ctg200□ctg617□ctg667□WAG-126D12  
ctg2000□□□WAG-15H22  
ctg2000□ctg4380□ctg4550□WAG-45M10  
ctg2000□ctg4380□ctg4550□WAG-100P3  
ctg2000□ctg4380□ctg4550□WAG-120B15  
ctg2001□□□WAG-81G9  
ctg2001□□□WAG-84D4  
ctg2001□□□WAG-94F2  
ctg2001□□□WAG-108G20  
ctg2001□ctg4088□□WAG-44L12  
ctg2001□ctg4088□ctg6166□WAG-28E15  
ctg2001□ctg4088□ctg6166□WAG-65L23  
ctg2001□ctg5221□ctg5976□WAG-51A11  
ctg2001□ctg5221□ctg5976□WAG-109A7  
ctg2001□ctg5611□□WAG-23J3  
ctg2001□ctg5611□□WAG-51E2  
ctg2002□□□WAG-47E11  
ctg2002□□□WAG-55B10  
ctg2002□□□WAG-93D11  
ctg2002□ctg4495□□WAG-87G16  
ctg2002□ctg4495□□WAG-98L18  
ctg2002□ctg4495□□WAG-115K6  
ctg2003□□□WAG-125H16  
ctg2003□ctg4497□ctg4628□WAG-102P6  
ctg2003□ctg4497□ctg4628□WAG-119J11  
ctg2004□ctg3689□ctg3892□WAG-29J23  
ctg2004□ctg3689□ctg3892□WAG-44J23  
ctg2004□ctg3689□ctg3892□WAG-103P14  
ctg2004□ctg4862□ctg5149□WAG-47J14  
ctg2004□ctg4862□ctg5149□WAG-72B3  
ctg2005□ctg3691□ctg3897□WAG-21J6  
ctg2005□ctg3691□ctg3897□WAG-68N10  
ctg2005□ctg3691□ctg3897□WAG-78A1  
ctg2006□□□WAG-76L14  
ctg2006□ctg3692□ctg3903□WAG-30I16  
ctg2006□ctg3692□ctg3903□WAG-35I21  
ctg2006□ctg3692□ctg3903□WAG-50B9  
ctg2007□ctg3694□□WAG-107E16  
ctg2007□ctg3694□ctg5059□WAG-91M15  
ctg2007□ctg3694□ctg5059□WAG-99H6  
ctg2008□ctg3696□ctg3905□WAG-26E19  
ctg2008□ctg3696□ctg3905□WAG-37K15  
ctg2008□ctg3696□ctg3905□WAG-110J13  
ctg2009□ctg3697□□WAG-88F22  
ctg2009□ctg3697□ctg5078□WAG-32C18  
ctg2009□ctg3697□ctg5078□WAG-58H9  
ctg201□□□WAG-12C8  
ctg201□□□WAG-104D3  
ctg201□ctg1098□□WAG-58C15  
ctg201□ctg1098□ctg1274□WAG-1M2  
ctg201□ctg1098□ctg1274□WAG-6D12  
ctg201□ctg1098□ctg1274□WAG-86G23

ctg201□ctg1098□ctg1274□WAG-90L6  
ctg201□ctg1098□ctg1274□WAG-126H8  
ctg201□ctg4084□ctg5603□WAG-15G6  
ctg201□ctg4084□ctg5603□WAG-23K16  
ctg201□ctg4084□ctg6334□WAG-44K15  
ctg201□ctg4084□ctg6334□WAG-118M3  
ctg201□ctg5680□□WAG-17M11  
ctg201□ctg5680□□WAG-115M13  
ctg201□ctg618□ctg1863□WAG-15J5  
ctg201□ctg618□ctg1863□WAG-17E20  
ctg201□ctg618□ctg1863□WAG-17O19  
ctg201□ctg618□ctg1863□WAG-95K5  
ctg201□ctg618□ctg1863□WAG-106I21  
ctg201□ctg618□ctg865□WAG-13H14  
ctg201□ctg618□ctg865□WAG-40C15  
ctg201□ctg618□ctg865□WAG-46E16  
ctg201□ctg618□ctg865□WAG-54B12  
ctg201□ctg618□ctg865□WAG-60D7  
ctg201□ctg618□ctg865□WAG-63N7  
ctg201□ctg618□ctg865□WAG-69E5  
ctg201□ctg618□ctg865□WAG-73I4  
ctg201□ctg618□ctg865□WAG-118B6  
ctg2010□□□WAG-18B18  
ctg2010□□□WAG-128H1  
ctg2010□ctg3698□□WAG-106O14  
ctg2010□ctg3698□ctg4994□WAG-22L3  
ctg2010□ctg3698□ctg4994□WAG-100M24  
ctg2011□□□WAG-130I2  
ctg2011□ctg4507□ctg4639□WAG-30H4  
ctg2011□ctg4507□ctg4639□WAG-30H6  
ctg2012□□□WAG-115P14  
ctg2012□ctg4305□□WAG-18L6  
ctg2012□ctg4305□ctg6845□WAG-38E17  
ctg2012□ctg4305□ctg6845□WAG-59C10  
ctg2013□ctg3847□□WAG-12C9  
ctg2013□ctg3847□ctg4112□WAG-8K11  
ctg2013□ctg3847□ctg4112□WAG-81I4  
ctg2013□ctg3847□ctg4112□WAG-129I8  
ctg2014□□□WAG-70A16  
ctg2014□ctg3716□□WAG-69F15  
ctg2014□ctg3716□ctg4856□WAG-72C11  
ctg2014□ctg3716□ctg4856□WAG-100D10  
ctg2014□ctg5233□ctg6005□WAG-101G20  
ctg2014□ctg5233□ctg6005□WAG-129P6  
ctg2015□ctg3702□□WAG-60O22  
ctg2015□ctg3702□ctg4809□WAG-91I4  
ctg2015□ctg3702□ctg4809□WAG-126F2  
ctg2016□ctg4109□ctg5432□WAG-15L9  
ctg2016□ctg4109□ctg5432□WAG-64N5  
ctg2016□ctg4109□ctg6874□WAG-63L14  
ctg2016□ctg4109□ctg6874□WAG-88E9  
ctg2017□□□WAG-7H11  
ctg2017□□□WAG-8C1  
ctg2017□ctg4524□□WAG-39E6  
ctg2017□ctg4524□□WAG-70I21  
ctg2017□ctg4524□□WAG-71B6

ctg2017□ctg4524□□WAG-114C13  
ctg2018□□□WAG-125I6  
ctg2018□ctg4525□□WAG-40E8  
ctg2018□ctg4525□□WAG-99P20  
ctg2018□ctg4525□□WAG-111K1  
ctg2019□□□WAG-95I2  
ctg2019□ctg4531□□WAG-38J21  
ctg2019□ctg4531□□WAG-73F14  
ctg2019□ctg4531□□WAG-101J6  
ctg202□ctg512□□WAG-35M21  
ctg202□ctg512□ctg939□WAG-12K15  
ctg202□ctg512□ctg939□WAG-47I3  
ctg202□ctg512□ctg939□WAG-81P10  
ctg202□ctg512□ctg939□WAG-86B13  
ctg202□ctg512□ctg939□WAG-89O16  
ctg202□ctg512□ctg939□WAG-98A23  
ctg202□ctg512□ctg939□WAG-107E4  
ctg2020□□□WAG-27G7  
ctg2020□□□WAG-38D3  
ctg2020□□□WAG-47F17  
ctg2020□ctg4723□□WAG-30K2  
ctg2020□ctg4723□□WAG-114L24  
ctg2020□ctg4723□□WAG-129L11  
ctg2020□ctg5276□ctg6103□WAG-28F19  
ctg2020□ctg5276□ctg6103□WAG-85H23  
ctg2020□ctg5559□ctg6706□WAG-52G21  
ctg2020□ctg5559□ctg6706□WAG-55L20  
ctg2021□ctg4538□□WAG-40D16  
ctg2021□ctg4538□ctg4679□WAG-88F19  
ctg2021□ctg4538□ctg4679□WAG-119F15  
ctg2022□□□WAG-76F15  
ctg2022□□□WAG-117K24  
ctg2022□□□WAG-130A17  
ctg2022□ctg4304□□WAG-107G14  
ctg2022□ctg4304□ctg6831□WAG-1L3  
ctg2022□ctg4304□ctg6831□WAG-84L4  
ctg2022□ctg4543□□WAG-1H1  
ctg2022□ctg4543□□WAG-42M8  
ctg2022□ctg4543□ctg4693□WAG-4B11  
ctg2022□ctg4543□ctg4693□WAG-4C10  
ctg2022□ctg6444□□WAG-40K9  
ctg2022□ctg6444□□WAG-110M6  
ctg2023□□□WAG-117E12  
ctg2023□ctg4347□□WAG-90B23  
ctg2023□ctg4347□ctg6461□WAG-92C7  
ctg2023□ctg4347□ctg6461□WAG-105B11  
ctg2024□□□WAG-70B10  
ctg2024□ctg4561□ctg4703□WAG-99M6  
ctg2024□ctg4561□ctg4703□WAG-107H19  
ctg2025□ctg3727□ctg3948□WAG-73K12  
ctg2025□ctg3727□ctg3948□WAG-76M12  
ctg2025□ctg3727□ctg3948□WAG-86P12  
ctg2026□ctg3729□□WAG-111E19  
ctg2026□ctg3729□ctg4889□WAG-112L19  
ctg2026□ctg3729□ctg4889□WAG-112M19  
ctg2027□□□WAG-17L21

ctg2027□□□WAG-17P6  
ctg2027□□□WAG-51K4  
ctg2027□□□WAG-79E22  
ctg2027□□□WAG-106H2  
ctg2028□□□WAG-43F7  
ctg2028□□□WAG-86B10  
ctg2028□ctg5547□ctg6683□WAG-88L1  
ctg2028□ctg5547□ctg6683□WAG-99P21  
ctg2029□ctg3731□□WAG-51B23  
ctg2029□ctg3731□□WAG-54E21  
ctg2029□ctg3731□□WAG-60F16  
ctg2029□ctg3731□□WAG-97E9  
ctg2029□ctg3731□□WAG-118F7  
ctg2029□ctg3731□□WAG-126H16  
ctg203□ctg932□□WAG-63M22  
ctg203□ctg932□□WAG-89C20  
ctg203□ctg932□ctg781□WAG-15G15  
ctg203□ctg932□ctg781□WAG-15N5  
ctg203□ctg932□ctg781□WAG-43A20  
ctg203□ctg932□ctg781□WAG-44N18  
ctg203□ctg932□ctg781□WAG-45H14  
ctg203□ctg932□ctg781□WAG-57M7  
ctg203□ctg932□ctg781□WAG-73H18  
ctg203□ctg932□ctg781□WAG-75D9  
ctg203□ctg932□ctg781□WAG-97C8  
ctg203□ctg932□ctg781□WAG-106E23  
ctg203□ctg932□ctg781□WAG-110D17  
ctg203□ctg932□ctg781□WAG-120F16  
ctg2030□□□WAG-82H19  
ctg2030□ctg4571□□WAG-42D24  
ctg2030□ctg4571□□WAG-64O21  
ctg2030□ctg4571□□WAG-123A2  
ctg2031□□□WAG-74J6  
ctg2031□□□WAG-76M19  
ctg2031□□□WAG-106I16  
ctg2031□ctg4572□□WAG-19G5  
ctg2031□ctg4572□□WAG-26J22  
ctg2031□ctg4572□□WAG-121D19  
ctg2032□□□WAG-104F1  
ctg2032□ctg4471□□WAG-103C21  
ctg2032□ctg4471□□WAG-109H6  
ctg2032□ctg4471□□WAG-124C6  
ctg2033□ctg3811□ctg5062□WAG-69A4  
ctg2033□ctg3811□ctg5062□WAG-80D20  
ctg2033□ctg3811□ctg6745□WAG-50A2  
ctg2033□ctg3811□ctg6745□WAG-77C4  
ctg2034□ctg3734□ctg3962□WAG-79A1  
ctg2034□ctg3734□ctg3962□WAG-97A18  
ctg2035□□□WAG-20O12  
ctg2035□□□WAG-105J23  
ctg2035□ctg5321□ctg6204□WAG-68P4  
ctg2035□ctg5321□ctg6204□WAG-103E15  
ctg2036□□□WAG-63I19  
ctg2036□□□WAG-84F1  
ctg2036□□□WAG-128M23  
ctg2036□ctg4588□ctg4751□WAG-17I24

ctg2036□ctg4588□ctg4751□WAG-60F3  
ctg2036□ctg5805□□WAG-11K4  
ctg2036□ctg5805□□WAG-87A6  
ctg2037□□□WAG-84K8  
ctg2037□ctg4568□ctg4718□WAG-56E10  
ctg2037□ctg4568□ctg4718□WAG-60H23  
ctg2038□ctg3745□□WAG-77H9  
ctg2038□ctg3745□ctg5030□WAG-63C4  
ctg2038□ctg3745□ctg5030□WAG-102A10  
ctg2039□□□WAG-60G20  
ctg2039□ctg4110□□WAG-16L2  
ctg2039□ctg4110□□WAG-26C6  
ctg2039□ctg4110□□WAG-75H19  
ctg2039□ctg4110□□WAG-106G11  
ctg2039□ctg4110□ctg6240□WAG-15M17  
ctg2039□ctg4110□ctg6240□WAG-123H13  
ctg204□ctg513□ctg546□WAG-8F10  
ctg204□ctg513□ctg546□WAG-19M11  
ctg204□ctg513□ctg546□WAG-22N19  
ctg204□ctg513□ctg546□WAG-55I1  
ctg204□ctg513□ctg546□WAG-70L1  
ctg204□ctg513□ctg546□WAG-77I21  
ctg204□ctg513□ctg546□WAG-90C1  
ctg204□ctg513□ctg546□WAG-124A20  
ctg204□ctg513□ctg546□WAG-124B3  
ctg2040□□□WAG-66H20  
ctg2040□ctg3867□□WAG-7N7  
ctg2040□ctg3867□□WAG-106A21  
ctg2040□ctg3867□ctg4132□WAG-6L21  
ctg2040□ctg3867□ctg4132□WAG-42F11  
ctg2040□ctg3867□ctg4132□WAG-115M4  
ctg2040□ctg6281□□WAG-38I6  
ctg2040□ctg6281□□WAG-115L11  
ctg2041□□□WAG-18P6  
ctg2041□□□WAG-94O8  
ctg2041□ctg5191□ctg5902□WAG-77N21  
ctg2041□ctg5191□ctg5902□WAG-90I13  
ctg2042□ctg3752□ctg3985□WAG-44N2  
ctg2042□ctg3752□ctg3985□WAG-80C10  
ctg2043□ctg3754□□WAG-38I22  
ctg2043□ctg3754□ctg4911□WAG-21I3  
ctg2043□ctg3754□ctg4911□WAG-57D13  
ctg2044□ctg3756□ctg3992□WAG-15F11  
ctg2044□ctg3756□ctg3992□WAG-19D2  
ctg2044□ctg3756□ctg3992□WAG-42H10  
ctg2045□ctg4448□□WAG-46C1  
ctg2045□ctg4448□□WAG-69M7  
ctg2045□ctg4448□□WAG-80M24  
ctg2045□ctg5400□ctg6393□WAG-83N3  
ctg2045□ctg5400□ctg6393□WAG-119B2  
ctg2046□□□WAG-3P6  
ctg2046□□□WAG-49M13  
ctg2046□ctg5358□□WAG-17H20  
ctg2046□ctg5358□□WAG-128B4  
ctg2047□□□WAG-129E11  
ctg2047□ctg3965□□WAG-113O1

ctg2047□ctg3965□ctg5811□WAG-50J13  
ctg2047□ctg3965□ctg5811□WAG-63I15  
ctg2048□□□WAG-23N2  
ctg2048□ctg4621□□WAG-35L16  
ctg2048□ctg4621□□WAG-46L24  
ctg2048□ctg4621□□WAG-129M2  
ctg2049□□□WAG-57I12  
ctg2049□ctg4622□□WAG-31H21  
ctg2049□ctg4622□□WAG-117P19  
ctg2049□ctg4622□□WAG-122D24  
ctg205□□□WAG-39G24  
ctg205□ctg514□ctg416□WAG-6P15  
ctg205□ctg514□ctg416□WAG-12P3  
ctg205□ctg514□ctg416□WAG-15N13  
ctg205□ctg514□ctg416□WAG-68D18  
ctg205□ctg514□ctg416□WAG-86B20  
ctg205□ctg514□ctg416□WAG-86M1  
ctg205□ctg514□ctg416□WAG-122J8  
ctg2050□□□WAG-41K2  
ctg2050□□□WAG-103M9  
ctg2050□ctg4462□□WAG-23C18  
ctg2050□ctg4462□ctg6368□WAG-100J17  
ctg2050□ctg4462□ctg6368□WAG-111C12  
ctg2051□□□WAG-12N12  
ctg2051□ctg4468□□WAG-49P23  
ctg2051□ctg4468□ctg6499□WAG-6H23  
ctg2051□ctg4468□ctg6499□WAG-48J18  
ctg2052□ctg3765□ctg4005□WAG-34D4  
ctg2052□ctg3765□ctg4005□WAG-61A14  
ctg2052□ctg3765□ctg4005□WAG-88L8  
ctg2053□ctg5634□□WAG-122C23  
ctg2053□ctg5634□□WAG-125G16  
ctg2053□ctg6256□□WAG-41N19  
ctg2053□ctg6256□□WAG-101B9  
ctg2054□ctg3766□ctg4008□WAG-23O6  
ctg2054□ctg3766□ctg4008□WAG-99H17  
ctg2055□□□WAG-32A10  
ctg2055□□□WAG-77J16  
ctg2055□ctg5370□ctg6318□WAG-25L9  
ctg2055□ctg5370□ctg6318□WAG-79E18  
ctg2056□ctg3770□□WAG-6G24  
ctg2056□ctg3770□ctg4959□WAG-98D8  
ctg2056□ctg3770□ctg4959□WAG-101K8  
ctg2057□□□WAG-123I17  
ctg2057□ctg4582□ctg4734□WAG-32E5  
ctg2057□ctg4582□ctg4734□WAG-113C13  
ctg2058□ctg3772□ctg4018□WAG-41K13  
ctg2058□ctg3772□ctg4018□WAG-62C20  
ctg2058□ctg3772□ctg4018□WAG-77N24  
ctg2059□□□WAG-37O13  
ctg2059□□□WAG-69O11  
ctg2059□ctg4470□□WAG-21G13  
ctg2059□ctg4470□□WAG-44C17  
ctg2059□ctg4470□□WAG-130N12  
ctg206□□□WAG-114A21  
ctg206□ctg582□ctg610□WAG-8C19

ctg206□ctg582□ctg610□WAG-44D10  
ctg206□ctg582□ctg610□WAG-69A15  
ctg206□ctg582□ctg610□WAG-128F2  
ctg206□ctg582□ctg610□WAG-130I3  
ctg206□ctg582□ctg610□WAG-130J13  
ctg206□ctg582□ctg610□WAG-130O1  
ctg2060□ctg4632□□WAG-1A1  
ctg2060□ctg4632□□WAG-17B15  
ctg2060□ctg4632□□WAG-67E3  
ctg2060□ctg5470□ctg6536□WAG-51F15  
ctg2060□ctg5470□ctg6536□WAG-109A16  
ctg2061□ctg3778□ctg4029□WAG-31N13  
ctg2061□ctg3778□ctg4029□WAG-101N13  
ctg2062□ctg3780□ctg4033□WAG-57F3  
ctg2062□ctg3780□ctg4033□WAG-73B15  
ctg2063□ctg3781□ctg5001□WAG-81K1  
ctg2063□ctg3781□ctg5001□WAG-87I3  
ctg2063□ctg3781□ctg5001□WAG-125I3  
ctg2064□□□WAG-50G22  
ctg2064□□□WAG-103I5  
ctg2064□ctg4410□□WAG-79N10  
ctg2064□ctg4410□□WAG-87J17  
ctg2064□ctg4410□□WAG-96N16  
ctg2065□ctg3786□□WAG-14N22  
ctg2065□ctg3786□ctg5291□WAG-17I10  
ctg2065□ctg3786□ctg5291□WAG-79I8  
ctg2066□□□WAG-5O19  
ctg2066□ctg4652□□WAG-14M5  
ctg2066□ctg4652□□WAG-86P6  
ctg2066□ctg4652□□WAG-106E19  
ctg2067□ctg3788□ctg4040□WAG-77P19  
ctg2067□ctg3788□ctg4040□WAG-86K19  
ctg2067□ctg3788□ctg4040□WAG-129O6  
ctg2068□ctg3799□□WAG-33L22  
ctg2068□ctg3799□ctg4839□WAG-30H5  
ctg2068□ctg3799□ctg4839□WAG-68O14  
ctg2069□□□WAG-23I3  
ctg2069□□□WAG-40M14  
ctg2069□□□WAG-52P23  
ctg2069□ctg4587□ctg4749□WAG-70C17  
ctg2069□ctg4587□ctg4749□WAG-91N22  
ctg207□□□WAG-34L5  
ctg207□□□WAG-82K18  
ctg207□ctg748□ctg608□WAG-21N9  
ctg207□ctg748□ctg608□WAG-59B10  
ctg207□ctg748□ctg608□WAG-86F17  
ctg207□ctg748□ctg608□WAG-93P24  
ctg207□ctg748□ctg608□WAG-116A23  
ctg207□ctg748□ctg608□WAG-124F1  
ctg2070□□□WAG-29N1  
ctg2070□□□WAG-54N6  
ctg2070□ctg4509□□WAG-58P4  
ctg2070□ctg4509□□WAG-76C20  
ctg2070□ctg4509□□WAG-111A3  
ctg2071□ctg3801□□WAG-51D11  
ctg2071□ctg3801□ctg5047□WAG-63J19

ctg2071□ctg3801□ctg5047□WAG-78K9  
ctg2072□□□WAG-109D20  
ctg2072□ctg4665□□WAG-20P5  
ctg2072□ctg4665□□WAG-24F9  
ctg2072□ctg4665□□WAG-91J15  
ctg2073□ctg3806□ctg4065□WAG-100O14  
ctg2073□ctg3806□ctg4065□WAG-109G12  
ctg2074□ctg3808□ctg4069□WAG-69C7  
ctg2074□ctg3808□ctg4069□WAG-94N9  
ctg2075□□□WAG-6O9  
ctg2075□□□WAG-117D14  
ctg2075□□□WAG-125H3  
ctg2075□ctg3809□ctg4070□WAG-47H21  
ctg2075□ctg3809□ctg4070□WAG-65J1  
ctg2076□□□WAG-25E2  
ctg2076□□□WAG-59K24  
ctg2076□ctg5471□ctg6539□WAG-35G23  
ctg2076□ctg5471□ctg6539□WAG-101F4  
ctg2077□□□WAG-10I6  
ctg2077□ctg5277□ctg6104□WAG-81J22  
ctg2077□ctg5277□ctg6104□WAG-96H24  
ctg2077□ctg6219□□WAG-2H23  
ctg2077□ctg6219□□WAG-3N11  
ctg2078□ctg4535□ctg4668□WAG-76K1  
ctg2078□ctg4535□ctg4668□WAG-114I1  
ctg2078□ctg5755□□WAG-49O19  
ctg2078□ctg5755□□WAG-118F13  
ctg2079□□□WAG-100A22  
ctg2079□ctg3812□□WAG-32G15  
ctg2079□ctg3812□ctg5379□WAG-124J24  
ctg2079□ctg3812□ctg5379□WAG-129L15  
ctg208□ctg645□ctg4435□WAG-80N5  
ctg208□ctg645□ctg4435□WAG-129M22  
ctg208□ctg645□ctg692□WAG-24G11  
ctg208□ctg645□ctg692□WAG-42A8  
ctg208□ctg645□ctg692□WAG-75A3  
ctg208□ctg645□ctg692□WAG-113J17  
ctg208□ctg645□ctg692□WAG-119I5  
ctg208□ctg645□ctg692□WAG-124B8  
ctg2080□□□WAG-85K11  
ctg2080□ctg4677□□WAG-58O5  
ctg2080□ctg4677□□WAG-89B23  
ctg2080□ctg4677□□WAG-95B24  
ctg2081□ctg3821□ctg4078□WAG-79K18  
ctg2081□ctg3821□ctg4078□WAG-101G17  
ctg2081□ctg3821□ctg4078□WAG-115L1  
ctg2082□ctg3822□ctg4079□WAG-58F8  
ctg2082□ctg3822□ctg4079□WAG-60H1  
ctg2082□ctg3822□ctg4079□WAG-109H4  
ctg2083□ctg3826□ctg4088□WAG-15C20  
ctg2083□ctg3826□ctg4088□WAG-33E24  
ctg2083□ctg3826□ctg4088□WAG-72C5  
ctg2084□□□WAG-100N17  
ctg2084□□□WAG-126P12  
ctg2084□ctg4040□ctg4307□WAG-39H23  
ctg2084□ctg4040□ctg4307□WAG-43P22



ctg2084□ctg4040□ctg4307□WAG-109G13  
ctg2084□ctg6085□□WAG-59J7  
ctg2084□ctg6085□□WAG-124K16  
ctg2085□ctg3830□□WAG-81E13  
ctg2085□ctg3830□ctg5071□WAG-46G22  
ctg2085□ctg3830□ctg5071□WAG-109E22  
ctg2086□ctg3831□□WAG-39E9  
ctg2086□ctg3831□ctg5099□WAG-11N20  
ctg2086□ctg3831□ctg5099□WAG-56I22  
ctg2087□□□WAG-55K21  
ctg2087□ctg4687□ctg4858□WAG-1O6  
ctg2087□ctg4687□ctg4858□WAG-88D19  
ctg2088□□□WAG-25M1  
ctg2088□ctg4547□□WAG-3M18  
ctg2088□ctg4547□ctg6914□WAG-114M13  
ctg2088□ctg4547□ctg6914□WAG-128M9  
ctg2089□□□WAG-36J19  
ctg2089□□□WAG-46J3  
ctg2089□ctg4552□□WAG-63K23  
ctg2089□ctg4552□□WAG-91J5  
ctg2089□ctg4552□□WAG-100E10  
ctg2089□ctg4552□□WAG-127C1  
ctg209□ctg647□□WAG-6G21  
ctg209□ctg647□□WAG-50O20  
ctg209□ctg647□□WAG-89E17  
ctg209□ctg647□□WAG-92J2  
ctg209□ctg647□ctg3475□WAG-68P18  
ctg209□ctg647□ctg3475□WAG-84N4  
ctg209□ctg647□ctg6699□WAG-72A14  
ctg209□ctg647□ctg6699□WAG-81B13  
ctg209□ctg647□ctg867□WAG-38F13  
ctg209□ctg647□ctg867□WAG-79H11  
ctg209□ctg647□ctg867□WAG-90O9  
ctg209□ctg647□ctg867□WAG-115M20  
ctg209□ctg647□ctg867□WAG-118D16  
ctg209□ctg647□ctg867□WAG-130A20  
ctg2090□ctg3834□ctg4097□WAG-22L18  
ctg2090□ctg3834□ctg4097□WAG-51P21  
ctg2090□ctg3834□ctg4097□WAG-108K1  
ctg2090□ctg5694□□WAG-7C23  
ctg2090□ctg5694□□WAG-71B12  
ctg2090□ctg5827□□WAG-21H24  
ctg2090□ctg5827□□WAG-84D24  
ctg2091□ctg3836□□WAG-24L4  
ctg2091□ctg3836□□WAG-54F16  
ctg2091□ctg3836□ctg5358□WAG-26E18  
ctg2091□ctg3836□ctg5358□WAG-49I10  
ctg2092□ctg3839□ctg4110□WAG-50D21  
ctg2092□ctg3839□ctg4110□WAG-98G7  
ctg2093□□□WAG-33A14  
ctg2093□□□WAG-63K18  
ctg2093□ctg5815□□WAG-60I19  
ctg2093□ctg5815□□WAG-63C16  
ctg2094□□□WAG-12D9  
ctg2094□□□WAG-100M8  
ctg2094□□□WAG-119N5

ctg2094□ctg5567□□WAG-32F16  
ctg2094□ctg5567□□WAG-118M15  
ctg2095□ctg3840□□WAG-99O16  
ctg2095□ctg3840□ctg4986□WAG-11B10  
ctg2095□ctg3840□ctg4986□WAG-121B18  
ctg2096□ctg3841□□WAG-5I24  
ctg2096□ctg3841□ctg5108□WAG-110E8  
ctg2096□ctg3841□ctg5108□WAG-121A7  
ctg2097□ctg3843□□WAG-64C6  
ctg2097□ctg3843□ctg5068□WAG-3K6  
ctg2097□ctg3843□ctg5068□WAG-54K3  
ctg2098□□□WAG-119L6  
ctg2098□ctg4700□ctg4872□WAG-78N6  
ctg2098□ctg4700□ctg4872□WAG-90A7  
ctg2099□□□WAG-8A17  
ctg2099□□□WAG-13B18  
ctg2099□□□WAG-48J15  
ctg2099□ctg4511□□WAG-5J9  
ctg2099□ctg4511□□WAG-15K19  
ctg2099□ctg4511□□WAG-18D4  
ctg2099□ctg4511□□WAG-106H24  
ctg21□ctg100□ctg78□WAG-11P4  
ctg21□ctg100□ctg78□WAG-21C14  
ctg21□ctg100□ctg78□WAG-27N20  
ctg21□ctg100□ctg78□WAG-44H15  
ctg21□ctg100□ctg78□WAG-62G13  
ctg21□ctg100□ctg78□WAG-69P23  
ctg21□ctg100□ctg78□WAG-93A12  
ctg21□ctg100□ctg78□WAG-99D17  
ctg21□ctg100□ctg78□WAG-99J24  
ctg21□ctg100□ctg78□WAG-105J9  
ctg21□ctg100□ctg78□WAG-117J24  
ctg21□ctg100□ctg78□WAG-120K13  
ctg210□ctg517□□WAG-3K5  
ctg210□ctg517□□WAG-21H8  
ctg210□ctg517□□WAG-37P16  
ctg210□ctg517□□WAG-74B23  
ctg210□ctg517□□WAG-80I23  
ctg210□ctg517□□WAG-105M13  
ctg210□ctg517□ctg516□WAG-24B8  
ctg210□ctg517□ctg516□WAG-32E7  
ctg210□ctg517□ctg516□WAG-35M11  
ctg210□ctg517□ctg516□WAG-37L7  
ctg210□ctg517□ctg516□WAG-48J12  
ctg210□ctg517□ctg516□WAG-65L6  
ctg210□ctg517□ctg516□WAG-102F12  
ctg210□ctg517□ctg516□WAG-121K3  
ctg210□ctg517□ctg516□WAG-127P14  
ctg210□ctg517□ctg539□WAG-17F18  
ctg210□ctg517□ctg539□WAG-29M15  
ctg210□ctg517□ctg539□WAG-64O5  
ctg210□ctg517□ctg539□WAG-81E9  
ctg210□ctg517□ctg539□WAG-92O9  
ctg210□ctg517□ctg539□WAG-110C11  
ctg210□ctg517□ctg539□WAG-114P6  
ctg210□ctg517□ctg539□WAG-120L19

ctg2100□□□WAG-4I12  
ctg2100□ctg3870□ctg4137□WAG-44F23  
ctg2100□ctg3870□ctg4137□WAG-85B18  
ctg2100□ctg3870□ctg4137□WAG-111K16  
ctg2101□□□WAG-22C14  
ctg2101□ctg4570□ctg4729□WAG-8E14  
ctg2101□ctg4570□ctg4729□WAG-104J18  
ctg2102□ctg3844□□WAG-61I13  
ctg2102□ctg3844□ctg5159□WAG-66L15  
ctg2102□ctg3844□ctg5159□WAG-98H16  
ctg2103□ctg3851□ctg4122□WAG-11L19  
ctg2103□ctg3851□ctg4122□WAG-54D14  
ctg2103□ctg3851□ctg4122□WAG-93H15  
ctg2104□ctg3854□ctg4125□WAG-112I6  
ctg2104□ctg3854□ctg4125□WAG-118B20  
ctg2105□□□WAG-48H23  
ctg2105□ctg4123□ctg4384□WAG-94C19  
ctg2105□ctg4123□ctg4384□WAG-127G5  
ctg2105□ctg4123□ctg4384□WAG-128E19  
ctg2106□□□WAG-35D16  
ctg2106□ctg4413□□WAG-78A15  
ctg2106□ctg4413□ctg6671□WAG-69J19  
ctg2106□ctg4413□ctg6671□WAG-129C9  
ctg2107□□□WAG-40G20  
ctg2107□□□WAG-87L18  
ctg2107□□□WAG-107P2  
ctg2107□ctg5588□ctg6746□WAG-57O9  
ctg2107□ctg5588□ctg6746□WAG-75F1  
ctg2108□□□WAG-67K20  
ctg2108□ctg3924□ctg4202□WAG-29G17  
ctg2108□ctg3924□ctg4202□WAG-93H6  
ctg2108□ctg3924□ctg4202□WAG-104N12  
ctg2109□ctg3858□□WAG-101L17  
ctg2109□ctg3858□ctg5116□WAG-71M19  
ctg2109□ctg3858□ctg5116□WAG-93N17  
ctg211□ctg520□□WAG-42H18  
ctg211□ctg520□ctg727□WAG-4I22  
ctg211□ctg520□ctg727□WAG-17H15  
ctg211□ctg520□ctg727□WAG-22N10  
ctg211□ctg520□ctg727□WAG-76L8  
ctg211□ctg520□ctg727□WAG-78K12  
ctg211□ctg520□ctg727□WAG-107G4  
ctg211□ctg520□ctg727□WAG-107G8  
ctg211□ctg520□ctg727□WAG-113G22  
ctg2110□□□WAG-53A24  
ctg2110□ctg4721□ctg4907□WAG-40A21  
ctg2110□ctg4721□ctg4907□WAG-130B15  
ctg2110□ctg5541□□WAG-41D12  
ctg2110□ctg5541□□WAG-95N13  
ctg2111□ctg4598□□WAG-29C11  
ctg2111□ctg4598□□WAG-79L10  
ctg2111□ctg4598□□WAG-86M23  
ctg2111□ctg5817□□WAG-60E14  
ctg2111□ctg5817□□WAG-67P16  
ctg2112□□□WAG-16B7  
ctg2112□ctg4606□ctg4766□WAG-96F22

ctg2112□ctg4606□ctg4766□WAG-121G16  
ctg2113□□□WAG-13G11  
ctg2113□□□WAG-59E11  
ctg2113□ctg4581□ctg4733□WAG-79E17  
ctg2113□ctg4581□ctg4733□WAG-125N12  
ctg2114□□□WAG-113N15  
ctg2114□ctg4591□ctg4761□WAG-3I22  
ctg2114□ctg4591□ctg4761□WAG-74O16  
ctg2114□ctg4697□ctg4868□WAG-25N3  
ctg2114□ctg4697□ctg4868□WAG-121J7  
ctg2115□□□WAG-41E17  
ctg2115□ctg4502□ctg4634□WAG-44B10  
ctg2115□ctg4502□ctg4634□WAG-61A20  
ctg2116□□□WAG-109J18  
ctg2116□ctg4612□ctg4783□WAG-6C5  
ctg2116□ctg4612□ctg4783□WAG-122N4  
ctg2117□ctg3863□□WAG-67O21  
ctg2117□ctg3863□ctg5534□WAG-78J18  
ctg2117□ctg3863□ctg5534□WAG-123H18  
ctg2118□□□WAG-45N15  
ctg2118□□□WAG-69A24  
ctg2118□ctg4382□ctg5959□WAG-89E7  
ctg2118□ctg4382□ctg5959□WAG-91J11  
ctg2118□ctg4382□ctg6969□WAG-89M6  
ctg2118□ctg4382□ctg6969□WAG-112G22  
ctg2119□□□WAG-39D17  
ctg2119□ctg3869□ctg4135□WAG-20K2  
ctg2119□ctg3869□ctg4135□WAG-57I15  
ctg2119□ctg3869□ctg4135□WAG-128I17  
ctg212□□□WAG-41A10  
ctg212□ctg522□ctg574□WAG-26J21  
ctg212□ctg522□ctg574□WAG-57H3  
ctg212□ctg522□ctg574□WAG-58G9  
ctg212□ctg522□ctg574□WAG-77P11  
ctg212□ctg522□ctg574□WAG-113D11  
ctg212□ctg522□ctg574□WAG-114H16  
ctg212□ctg522□ctg574□WAG-121O21  
ctg212□ctg522□ctg574□WAG-122I10  
ctg212□ctg6525□□WAG-9J23  
ctg212□ctg6525□□WAG-43C19  
ctg2120□ctg3871□ctg4138□WAG-90G20  
ctg2120□ctg3871□ctg4138□WAG-126O16  
ctg2121□ctg3875□□WAG-101A12  
ctg2121□ctg3875□ctg5028□WAG-108F16  
ctg2121□ctg3875□ctg5028□WAG-114M5  
ctg2122□□□WAG-52D17  
ctg2122□ctg3876□□WAG-42M9  
ctg2122□ctg3876□ctg5061□WAG-1H16  
ctg2122□ctg3876□ctg5061□WAG-69G13  
ctg2123□ctg3880□ctg4146□WAG-51L18  
ctg2123□ctg3880□ctg4146□WAG-75J3  
ctg2123□ctg3880□ctg4146□WAG-86F19  
ctg2123□ctg5750□ctg6894□WAG-28I13  
ctg2123□ctg5750□ctg6894□WAG-109O6  
ctg2124□ctg3885□ctg4157□WAG-27H9  
ctg2124□ctg3885□ctg4157□WAG-93F20

ctg2124□ctg3885□ctg4157□WAG-128A10  
ctg2125□□□WAG-53B8  
ctg2125□□□WAG-102F5  
ctg2125□ctg4553□□WAG-40P8  
ctg2125□ctg4553□ctg6941□WAG-22H7  
ctg2125□ctg4553□ctg6941□WAG-87O1  
ctg2126□□□WAG-42M22  
ctg2126□□□WAG-115K17  
ctg2126□ctg5829□□WAG-10L4  
ctg2126□ctg5829□□WAG-41A4  
ctg2127□□□WAG-60G19  
ctg2127□ctg4762□ctg4970□WAG-61F19  
ctg2127□ctg4762□ctg4970□WAG-80P22  
ctg2128□□□WAG-95H6  
ctg2128□ctg4764□ctg4975□WAG-49H21  
ctg2128□ctg4764□ctg4975□WAG-63O4  
ctg2129□□□WAG-107J17  
ctg2129□ctg4639□□WAG-62P4  
ctg2129□ctg4639□□WAG-72L6  
ctg2129□ctg4639□□WAG-109P1  
ctg213□□□WAG-86F4  
ctg213□ctg639□□WAG-10M22  
ctg213□ctg639□□WAG-13G19  
ctg213□ctg639□□WAG-18L16  
ctg213□ctg639□ctg1217□WAG-14B5  
ctg213□ctg639□ctg1217□WAG-44D17  
ctg213□ctg639□ctg1217□WAG-52M4  
ctg213□ctg639□ctg1217□WAG-80N20  
ctg213□ctg639□ctg1217□WAG-100H20  
ctg213□ctg639□ctg1217□WAG-110A7  
ctg213□ctg639□ctg1217□WAG-116D12  
ctg213□ctg639□ctg1217□WAG-121N20  
ctg2130□□□WAG-120G22  
ctg2130□ctg5385□ctg6352□WAG-90B3  
ctg2130□ctg5385□ctg6352□WAG-130F7  
ctg2130□ctg6308□□WAG-58N10  
ctg2130□ctg6308□□WAG-59I3  
ctg2131□□□WAG-37E17  
ctg2131□□□WAG-94A23  
ctg2131□ctg4542□ctg4690□WAG-24O3  
ctg2131□ctg4542□ctg4690□WAG-89M17  
ctg2132□□□WAG-56K14  
ctg2132□ctg4775□□WAG-72J14  
ctg2132□ctg4775□□WAG-98E1  
ctg2132□ctg4775□□WAG-114F23  
ctg2133□ctg3892□ctg4168□WAG-32K21  
ctg2133□ctg3892□ctg4168□WAG-106P1  
ctg2133□ctg3892□ctg4168□WAG-118M23  
ctg2134□ctg3897□□WAG-119C23  
ctg2134□ctg3897□ctg5022□WAG-D13  
ctg2134□ctg3897□ctg5022□WAG-18A3  
ctg2135□ctg3899□□WAG-11C7  
ctg2135□ctg3899□ctg5245□WAG-81P11  
ctg2135□ctg3899□ctg5245□WAG-85A23  
ctg2136□□□WAG-31L16  
ctg2136□□□WAG-91I22

ctg2136□ctg4409□□WAG-83J17  
ctg2136□ctg4409□□WAG-89B4  
ctg2136□ctg4409□□WAG-96F5  
ctg2137□□□WAG-72K2  
ctg2137□ctg4608□ctg4773□WAG-54O12  
ctg2137□ctg4608□ctg4773□WAG-129N2  
ctg2138□□□WAG-39J17  
ctg2138□ctg4611□ctg4779□WAG-30N1  
ctg2138□ctg4611□ctg4779□WAG-100E22  
ctg2139□ctg3904□ctg4181□WAG-28B4  
ctg2139□ctg3904□ctg4181□WAG-45C1  
ctg2139□ctg3904□ctg4181□WAG-130H24  
ctg214□□□WAG-63A9  
ctg214□□□WAG-84M22  
ctg214□□□WAG-117P17  
ctg214□ctg626□□WAG-12O2  
ctg214□ctg626□□WAG-83K13  
ctg214□ctg626□ctg654□WAG-1N4  
ctg214□ctg626□ctg654□WAG-26M14  
ctg214□ctg626□ctg654□WAG-43K14  
ctg214□ctg626□ctg654□WAG-44C10  
ctg214□ctg626□ctg654□WAG-61I9  
ctg214□ctg626□ctg654□WAG-81B7  
ctg214□ctg626□ctg654□WAG-88H9  
ctg214□ctg626□ctg654□WAG-94J18  
ctg2140□ctg3906□ctg4185□WAG-22H9  
ctg2140□ctg3906□ctg4185□WAG-22P18  
ctg2140□ctg3906□ctg4185□WAG-128L9  
ctg2141□□□WAG-5F12  
ctg2141□ctg4797□ctg5039□WAG-43A2  
ctg2141□ctg4797□ctg5039□WAG-121A15  
ctg2142□□□WAG-10F13  
ctg2142□ctg3913□□WAG-7I18  
ctg2142□ctg3913□ctg5270□WAG-10E14  
ctg2142□ctg3913□ctg5270□WAG-123L7  
ctg2143□ctg3917□□WAG-110N10  
ctg2143□ctg3917□ctg5305□WAG-47C5  
ctg2143□ctg3917□ctg5305□WAG-66D8  
ctg2144□□□WAG-61E3  
ctg2144□□□WAG-94G5  
ctg2144□ctg5478□ctg6557□WAG-37C12  
ctg2144□ctg5478□ctg6557□WAG-68A11  
ctg2145□ctg5482□ctg6568□WAG-26N3  
ctg2145□ctg5482□ctg6568□WAG-54M18  
ctg2145□ctg6419□□WAG-34P7  
ctg2145□ctg6419□□WAG-123D4  
ctg2146□ctg3919□ctg5696□WAG-17C13  
ctg2146□ctg3919□ctg5696□WAG-73D17  
ctg2146□ctg3919□ctg5696□WAG-92P2  
ctg2147□ctg3920□ctg4196□WAG-46K7  
ctg2147□ctg3920□ctg4196□WAG-68F20  
ctg2147□ctg3920□ctg4196□WAG-126E18  
ctg2148□□□WAG-9P20  
ctg2148□ctg3922□ctg4199□WAG-83L3  
ctg2148□ctg3922□ctg4199□WAG-104N2  
ctg2148□ctg3922□ctg4199□WAG-119I10

ctg2149□□□WAG-43E10  
ctg2149□□□WAG-82A18  
ctg2149□□□WAG-82N6  
ctg2149□ctg6161□□WAG-28H23  
ctg2149□ctg6161□□WAG-119C24  
ctg215□ctg667□□WAG-80F19  
ctg215□ctg667□ctg540□WAG-60D13  
ctg215□ctg667□ctg540□WAG-61O5  
ctg215□ctg667□ctg540□WAG-68J12  
ctg215□ctg667□ctg540□WAG-118B9  
ctg215□ctg667□ctg5763□WAG-38D16  
ctg215□ctg667□ctg5763□WAG-73L14  
ctg2150□ctg3927□□WAG-115I7  
ctg2150□ctg3927□ctg4209□WAG-24F22  
ctg2150□ctg3927□ctg4209□WAG-114B24  
ctg2150□ctg3927□ctg4209□WAG-119M17  
ctg2150□ctg4967□ctg5380□WAG-46G16  
ctg2150□ctg4967□ctg5380□WAG-120H24  
ctg2151□ctg3928□ctg4210□WAG-13F4  
ctg2151□ctg3928□ctg4210□WAG-34K3  
ctg2151□ctg3928□ctg4210□WAG-94A17  
ctg2152□□□WAG-12E14  
ctg2152□ctg4807□ctg5053□WAG-56N4  
ctg2152□ctg4807□ctg5053□WAG-117B24  
ctg2153□ctg3931□□WAG-33K14  
ctg2153□ctg3931□ctg5721□WAG-15D1  
ctg2153□ctg3931□ctg5721□WAG-76I20  
ctg2154□ctg3933□□WAG-117M4  
ctg2154□ctg3933□ctg5325□WAG-2I24  
ctg2154□ctg3933□ctg5325□WAG-122H16  
ctg2155□ctg3937□□WAG-47H11  
ctg2155□ctg3937□ctg5349□WAG-22H8  
ctg2155□ctg3937□ctg5349□WAG-85E16  
ctg2156□ctg3938□ctg4213□WAG-28K10  
ctg2156□ctg3938□ctg4213□WAG-40E15  
ctg2156□ctg3938□ctg4213□WAG-80O11  
ctg2157□□□WAG-40J20  
ctg2157□ctg4685□ctg4853□WAG-107C19  
ctg2157□ctg4685□ctg4853□WAG-122C17  
ctg2158□□□WAG-87F15  
ctg2158□ctg4689□ctg4864□WAG-36G4  
ctg2158□ctg4689□ctg4864□WAG-59C9  
ctg2159□□□WAG-37N10  
ctg2159□ctg4693□□WAG-70I19  
ctg2159□ctg4693□□WAG-80J6  
ctg2159□ctg4693□□WAG-87E3  
ctg216□□□WAG-2O1  
ctg216□ctg553□□WAG-21B14  
ctg216□ctg553□ctg454□WAG-16A24  
ctg216□ctg553□ctg454□WAG-73G12  
ctg216□ctg553□ctg454□WAG-103O3  
ctg216□ctg553□ctg454□WAG-110P2  
ctg216□ctg553□ctg454□WAG-116O9  
ctg216□ctg553□ctg454□WAG-127B21  
ctg216□ctg800□□WAG-15A18  
ctg216□ctg800□□WAG-89K22

ctg216□ctg800□ctg822□WAG-27P14  
ctg216□ctg800□ctg822□WAG-30N10  
ctg216□ctg800□ctg822□WAG-42D2  
ctg216□ctg800□ctg822□WAG-45L15  
ctg216□ctg800□ctg822□WAG-54E3  
ctg216□ctg800□ctg822□WAG-78B12  
ctg216□ctg800□ctg822□WAG-110P8  
ctg2160□□□WAG-26N5  
ctg2160□ctg4690□ctg4866□WAG-11D10  
ctg2160□ctg4690□ctg4866□WAG-57C20  
ctg2161□□□WAG-91B23  
ctg2161□ctg4705□ctg4884□WAG-10C3  
ctg2161□ctg4705□ctg4884□WAG-54E8  
ctg2162□□□WAG-17B20  
ctg2162□ctg3948□□WAG-98P24  
ctg2162□ctg3948□ctg5388□WAG-59H10  
ctg2162□ctg3948□ctg5388□WAG-98E10  
ctg2163□ctg3949□□WAG-24M14  
ctg2163□ctg3949□ctg5395□WAG-32P12  
ctg2163□ctg3949□ctg5395□WAG-88D23  
ctg2164□ctg4702□ctg4875□WAG-78A23  
ctg2164□ctg4702□ctg4875□WAG-109B4  
ctg2164□ctg6034□□WAG-18O13  
ctg2164□ctg6034□□WAG-78I1  
ctg2165□□□WAG-47O24  
ctg2165□ctg4703□ctg4876□WAG-6I7  
ctg2165□ctg4703□ctg4876□WAG-73P8  
ctg2166□ctg3955□ctg4229□WAG-14C2  
ctg2166□ctg3955□ctg4229□WAG-112N24  
ctg2167□ctg3959□ctg4236□WAG-13P22  
ctg2167□ctg3959□ctg4236□WAG-45F19  
ctg2167□ctg3959□ctg4236□WAG-62G11  
ctg2168□ctg3960□ctg4237□WAG-43F8  
ctg2168□ctg3960□ctg4237□WAG-52J24  
ctg2168□ctg3960□ctg4237□WAG-70H6  
ctg2169□□□WAG-67H2  
ctg2169□□□WAG-95G2  
ctg2169□ctg5883□□WAG-119K12  
ctg2169□ctg5883□□WAG-119P1  
ctg217□□□WAG-89M13  
ctg217□ctg673□ctg545□WAG-7A3  
ctg217□ctg673□ctg545□WAG-11P15  
ctg217□ctg673□ctg545□WAG-74O4  
ctg217□ctg673□ctg545□WAG-105H15  
ctg217□ctg673□ctg545□WAG-121B21  
ctg217□ctg673□ctg545□WAG-130P3  
ctg2170□ctg3966□□WAG-125M4  
ctg2170□ctg3966□ctg5805□WAG-23C11  
ctg2170□ctg3966□ctg5805□WAG-65C10  
ctg2171□ctg3968□□WAG-66A6  
ctg2171□ctg3968□ctg5437□WAG-38L14  
ctg2171□ctg3968□ctg5437□WAG-108P10  
ctg2172□ctg3972□□WAG-113N20  
ctg2172□ctg3972□ctg5339□WAG-58O19  
ctg2172□ctg3972□ctg5339□WAG-95B9  
ctg2173□□□WAG-32B15



ctg2173□□□WAG-60A11  
ctg2173□ctg3973□□WAG-51L11  
ctg2173□ctg3973□□WAG-68A24  
ctg2173□ctg3973□ctg5460□WAG-57I19  
ctg2173□ctg3973□ctg5460□WAG-64B18  
ctg2174□ctg3974□□WAG-75M3  
ctg2174□ctg3974□□WAG-76E2  
ctg2174□ctg3974□□WAG-79O7  
ctg2174□ctg3974□ctg5463□WAG-50M19  
ctg2174□ctg3974□ctg5463□WAG-51K17  
ctg2175□ctg3976□□WAG-53E9  
ctg2175□ctg3976□ctg5829□WAG-107P14  
ctg2175□ctg3976□ctg5829□WAG-114H10  
ctg2176□□□WAG-112K11  
ctg2176□ctg4854□ctg5135□WAG-73P7  
ctg2176□ctg4854□ctg5135□WAG-115L7  
ctg2177□□□WAG-15E19  
ctg2177□□□WAG-43N15  
ctg2177□ctg6290□□WAG-102D20  
ctg2177□ctg6290□□WAG-122P9  
ctg2178□□□WAG-47K24  
ctg2178□□□WAG-69I12  
ctg2178□ctg5898□□WAG-24J18  
ctg2178□ctg5898□□WAG-96M8  
ctg2179□ctg3978□ctg4243□WAG-53K19  
ctg2179□ctg3978□ctg4243□WAG-106F12  
ctg218□ctg1220□□WAG-29G14  
ctg218□ctg1220□ctg1064□WAG-27H6  
ctg218□ctg1220□ctg1064□WAG-33I20  
ctg218□ctg1220□ctg1064□WAG-42A19  
ctg218□ctg1220□ctg1064□WAG-66D23  
ctg218□ctg1220□ctg1064□WAG-85N13  
ctg218□ctg1220□ctg1064□WAG-95M14  
ctg218□ctg1220□ctg1064□WAG-108G3  
ctg218□ctg628□ctg3261□WAG-73A22  
ctg218□ctg628□ctg3261□WAG-111J15  
ctg218□ctg628□ctg3261□WAG-127F13  
ctg218□ctg628□ctg5523□WAG-4N4  
ctg218□ctg628□ctg5523□WAG-4P10  
ctg218□ctg628□ctg817□WAG-37O7  
ctg218□ctg628□ctg817□WAG-65D6  
ctg218□ctg628□ctg817□WAG-73A21  
ctg218□ctg628□ctg817□WAG-74F20  
ctg218□ctg628□ctg817□WAG-79E9  
ctg218□ctg628□ctg817□WAG-95K20  
ctg218□ctg628□ctg817□WAG-106M20  
ctg2180□ctg3980□ctg4246□WAG-33K9  
ctg2180□ctg3980□ctg4246□WAG-97H2  
ctg2181□ctg3984□□WAG-75L10  
ctg2181□ctg3984□ctg5480□WAG-95F3  
ctg2181□ctg3984□ctg5480□WAG-124G20  
ctg2182□ctg5937□□WAG-1F4  
ctg2182□ctg5937□□WAG-114K8  
ctg2182□ctg6480□□WAG-22F24  
ctg2182□ctg6480□□WAG-116N9  
ctg2183□ctg3985□□WAG-27F9

ctg2183□ctg3985□ctg5837□WAG-92I18  
ctg2183□ctg3985□ctg5837□WAG-124D14  
ctg2184□ctg3987□□WAG-65G4  
ctg2184□ctg3987□ctg5678□WAG-66M20  
ctg2184□ctg3987□ctg5678□WAG-95E10  
ctg2185□ctg3991□□WAG-103G12  
ctg2185□ctg3991□ctg5506□WAG-45F6  
ctg2185□ctg3991□ctg5506□WAG-70F20  
ctg2186□□□WAG-26P6  
ctg2186□ctg4022□□WAG-70L4  
ctg2186□ctg4022□ctg5961□WAG-13C2  
ctg2186□ctg4022□ctg5961□WAG-82J14  
ctg2186□ctg5948□□WAG-23M21  
ctg2186□ctg5948□□WAG-78F13  
ctg2187□□□WAG-45H6  
ctg2187□ctg4396□□WAG-53F21  
ctg2187□ctg4396□□WAG-58H23  
ctg2187□ctg4396□□WAG-109N8  
ctg2188□□□WAG-83K19  
ctg2188□ctg4474□□WAG-10H4  
ctg2188□ctg4474□□WAG-18I15  
ctg2188□ctg4474□□WAG-121F3  
ctg2189□ctg3998□ctg4267□WAG-39N6  
ctg2189□ctg3998□ctg4267□WAG-101G24  
ctg2189□ctg3998□ctg4267□WAG-109L6  
ctg2189□ctg6441□□WAG-46F7  
ctg2189□ctg6441□□WAG-58P17  
ctg219□□□WAG-14D1  
ctg219□ctg651□□WAG-89L18  
ctg219□ctg651□ctg698□WAG-10P15  
ctg219□ctg651□ctg698□WAG-24P1  
ctg219□ctg651□ctg698□WAG-52K9  
ctg219□ctg651□ctg698□WAG-60H24  
ctg219□ctg651□ctg698□WAG-88I24  
ctg219□ctg651□ctg698□WAG-89B15  
ctg219□ctg651□ctg698□WAG-101K22  
ctg219□ctg651□ctg698□WAG-104L14  
ctg219□ctg651□ctg698□WAG-105I19  
ctg2190□□□WAG-58H6  
ctg2190□ctg4740□ctg4943□WAG-14P15  
ctg2190□ctg4740□ctg4943□WAG-120J11  
ctg2191□ctg3999□ctg4271□WAG-11L18  
ctg2191□ctg3999□ctg4271□WAG-101P8  
ctg2191□ctg3999□ctg4271□WAG-123I10  
ctg2192□ctg5405□ctg6403□WAG-70J22  
ctg2192□ctg5405□ctg6403□WAG-105N1  
ctg2192□ctg5998□□WAG-90N10  
ctg2192□ctg5998□□WAG-113I16  
ctg2193□ctg4010□□WAG-15D8  
ctg2193□ctg4010□□WAG-67G12  
ctg2193□ctg4010□ctg5354□WAG-69P6  
ctg2193□ctg4010□ctg5354□WAG-76N5  
ctg2194□ctg4011□□WAG-44O2  
ctg2194□ctg4011□ctg5556□WAG-2D11  
ctg2194□ctg4011□ctg5556□WAG-56I19  
ctg2195□□□WAG-14O7

ctg2195□□□WAG-80J3  
ctg2195□ctg4258□ctg4459□WAG-48E17  
ctg2195□ctg4258□ctg4459□WAG-87N9  
ctg2195□ctg4258□ctg4459□WAG-126A24  
ctg2196□□□WAG-90B11  
ctg2196□ctg5674□□WAG-5M10  
ctg2196□ctg5674□ctg6852□WAG-11C6  
ctg2196□ctg5674□ctg6852□WAG-98F15  
ctg2197□□□WAG-1J6  
ctg2197□□□WAG-38O2  
ctg2197□ctg4014□□WAG-126F24  
ctg2197□ctg4014□ctg5954□WAG-25P5  
ctg2197□ctg4014□ctg5954□WAG-120N18  
ctg2198□ctg4015□ctg4282□WAG-61G22  
ctg2198□ctg4015□ctg4282□WAG-101L20  
ctg2199□ctg4018□ctg4285□WAG-31G14  
ctg2199□ctg4018□ctg4285□WAG-71P3  
ctg22□□□WAG-90L22  
ctg22□ctg101□ctg2846□WAG-96N2  
ctg22□ctg101□ctg2846□WAG-120C12  
ctg22□ctg101□ctg2846□WAG-121C2  
ctg22□ctg101□ctg73□WAG-30H23  
ctg22□ctg101□ctg73□WAG-34M7  
ctg22□ctg101□ctg73□WAG-38D4  
ctg22□ctg101□ctg73□WAG-44H7  
ctg22□ctg101□ctg73□WAG-77I7  
ctg22□ctg101□ctg73□WAG-89C7  
ctg22□ctg101□ctg73□WAG-90L11  
ctg22□ctg101□ctg73□WAG-91G9  
ctg22□ctg101□ctg73□WAG-111J2  
ctg22□ctg101□ctg73□WAG-114K6  
ctg22□ctg5570□ctg6720□WAG-20P8  
ctg22□ctg5570□ctg6720□WAG-93K6  
ctg220□□□WAG-94P10  
ctg220□ctg3249□ctg3288□WAG-21E4  
ctg220□ctg3249□ctg3288□WAG-25K4  
ctg220□ctg3249□ctg3288□WAG-129H5  
ctg220□ctg3249□ctg4567□WAG-33P22  
ctg220□ctg3249□ctg4567□WAG-62F4  
ctg2200□□□WAG-67O1  
ctg2200□□□WAG-102F20  
ctg2200□ctg4860□ctg5146□WAG-29F5  
ctg2200□ctg4860□ctg5146□WAG-77I9  
ctg2200□ctg6040□□WAG-33H12  
ctg2200□ctg6040□□WAG-122A9  
ctg2201□ctg4020□□WAG-57K12  
ctg2201□ctg4020□ctg5568□WAG-63H4  
ctg2201□ctg4020□ctg5568□WAG-85C3  
ctg2202□□□WAG-6B9  
ctg2202□□□WAG-65H7  
ctg2202□ctg6058□□WAG-42J10  
ctg2202□ctg6058□□WAG-77K17  
ctg2203□□□WAG-67G5  
ctg2203□□□WAG-98G19  
ctg2203□ctg5729□ctg6879□WAG-67F13  
ctg2203□ctg5729□ctg6879□WAG-93H18

ctg2204□ctg4021□□WAG-85I9  
ctg2204□ctg4021□ctg5955□WAG-108E10  
ctg2204□ctg4021□ctg5955□WAG-114G5  
ctg2205□ctg4026□□WAG-95E23  
ctg2205□ctg4026□ctg5977□WAG-3B21  
ctg2205□ctg4026□ctg5977□WAG-43D20  
ctg2206□ctg4030□□WAG-56I7  
ctg2206□ctg4030□ctg5587□WAG-74C9  
ctg2206□ctg4030□ctg5587□WAG-105I9  
ctg2207□□□WAG-33L16  
ctg2207□□□WAG-95I14  
ctg2207□ctg4454□□WAG-58J4  
ctg2207□ctg4454□□WAG-84P15  
ctg2207□ctg4454□□WAG-97C2  
ctg2208□□□WAG-83E18  
ctg2208□ctg4086□□WAG-73N17  
ctg2208□ctg4086□ctg6155□WAG-38D13  
ctg2208□ctg4086□ctg6155□WAG-106G19  
ctg2209□□□WAG-126B16  
ctg2209□ctg4887□ctg5208□WAG-40E19  
ctg2209□ctg4887□ctg5208□WAG-124G7  
ctg221□ctg543□□WAG-12E24  
ctg221□ctg543□ctg1305□WAG-22P5  
ctg221□ctg543□ctg1305□WAG-42L11  
ctg221□ctg543□ctg1305□WAG-57L9  
ctg221□ctg543□ctg1305□WAG-98K20  
ctg221□ctg543□ctg1305□WAG-103N13  
ctg221□ctg543□ctg1305□WAG-122L1  
ctg221□ctg543□ctg4896□WAG-53P24  
ctg221□ctg543□ctg4896□WAG-98O21  
ctg221□ctg543□ctg5070□WAG-44M2  
ctg221□ctg543□ctg5070□WAG-46K4  
ctg2210□□□WAG-124J21  
ctg2210□ctg4881□ctg5188□WAG-66J16  
ctg2210□ctg4881□ctg5188□WAG-83D20  
ctg2211□□□WAG-104A16  
ctg2211□ctg4898□ctg5223□WAG-49O2  
ctg2211□ctg4898□ctg5223□WAG-130E8  
ctg2212□□□WAG-48H9  
ctg2212□□□WAG-90C6  
ctg2212□□□WAG-127P19  
ctg2212□ctg6372□□WAG-119M6  
ctg2212□ctg6372□□WAG-122D1  
ctg2213□ctg4032□ctg4290□WAG-82B10  
ctg2213□ctg4032□ctg4290□WAG-126P6  
ctg2214□ctg4036□ctg4298□WAG-38M5  
ctg2214□ctg4036□ctg4298□WAG-130K6  
ctg2215□ctg4042□□WAG-77A17  
ctg2215□ctg4042□ctg5615□WAG-19O7  
ctg2215□ctg4042□ctg5615□WAG-32F14  
ctg2216□ctg4045□□WAG-12B6  
ctg2216□ctg4045□ctg5690□WAG-33L8  
ctg2216□ctg4045□ctg5690□WAG-69H18  
ctg2217□ctg4051□□WAG-110H8  
ctg2217□ctg4051□ctg5619□WAG-75F3  
ctg2217□ctg4051□ctg5619□WAG-107C13

ctg2218□□□WAG-87B16  
ctg2218□ctg4798□ctg5045□WAG-11E14  
ctg2218□ctg4798□ctg5045□WAG-112J21  
ctg2219□ctg4394□□WAG-51M24  
ctg2219□ctg4394□□WAG-82O8  
ctg2219□ctg4394□□WAG-84O20  
ctg2219□ctg5092□ctg5671□WAG-4L19  
ctg2219□ctg5092□ctg5671□WAG-124D3  
ctg222□□□WAG-12A12  
ctg222□□□WAG-105O17  
ctg222□ctg5148□ctg5809□WAG-32P14  
ctg222□ctg5148□ctg5809□WAG-54L5  
ctg222□ctg662□□WAG-3H17  
ctg222□ctg662□□WAG-6H21  
ctg222□ctg662□□WAG-39J6  
ctg222□ctg662□□WAG-72N15  
ctg222□ctg662□□WAG-106L21  
ctg222□ctg662□ctg2172□WAG-9K9  
ctg222□ctg662□ctg2172□WAG-55O7  
ctg222□ctg662□ctg2172□WAG-74P6  
ctg222□ctg662□ctg2172□WAG-113H14  
ctg222□ctg662□ctg2172□WAG-113I13  
ctg222□ctg662□ctg2172□WAG-113J15  
ctg222□ctg662□ctg4467□WAG-87L21  
ctg222□ctg662□ctg4467□WAG-97C1  
ctg222□ctg662□ctg928□WAG-43D8  
ctg222□ctg662□ctg928□WAG-55A4  
ctg222□ctg662□ctg928□WAG-61J4  
ctg222□ctg662□ctg928□WAG-75I4  
ctg222□ctg662□ctg928□WAG-75L11  
ctg222□ctg662□ctg928□WAG-112E19  
ctg2220□□□WAG-37C8  
ctg2220□□□WAG-111D10  
ctg2220□ctg5779□□WAG-17E2  
ctg2220□ctg5779□□WAG-123O11  
ctg2221□ctg4059□ctg4329□WAG-33L12  
ctg2221□ctg4059□ctg4329□WAG-120G6  
ctg2222□□□WAG-6F7  
ctg2222□ctg4060□ctg4330□WAG-25F9  
ctg2222□ctg4060□ctg4330□WAG-100H19  
ctg2223□ctg4061□ctg4332□WAG-9L21  
ctg2223□ctg4061□ctg4332□WAG-56O2  
ctg2224□□□WAG-21G1  
ctg2224□ctg4800□□WAG-79O19  
ctg2224□ctg4800□□WAG-83A21  
ctg2224□ctg4800□□WAG-118F14  
ctg2225□□□WAG-83N12  
ctg2225□□□WAG-115O6  
ctg2225□□□WAG-121O20  
ctg2225□ctg6128□□WAG-28H6  
ctg2225□ctg6128□□WAG-105O11  
ctg2226□ctg4066□□WAG-105E1  
ctg2226□ctg4066□ctg5654□WAG-34P11  
ctg2226□ctg4066□ctg5654□WAG-113F16  
ctg2227□□□WAG-40N18  
ctg2227□ctg4067□□WAG-28C5

ctg2227□ctg4067□ctg5657□WAG-97M23  
ctg2227□ctg4067□ctg5657□WAG-103K24  
ctg2228□ctg4068□□WAG-37I8  
ctg2228□ctg4068□ctg5412□WAG-48H13  
ctg2228□ctg4068□ctg5412□WAG-76H20  
ctg2229□ctg4071□□WAG-20H19  
ctg2229□ctg4071□ctg6116□WAG-26P13  
ctg2229□ctg4071□ctg6116□WAG-65L14  
ctg223□ctg545□ctg445□WAG-14O6  
ctg223□ctg545□ctg445□WAG-69F9  
ctg223□ctg545□ctg445□WAG-85F23  
ctg223□ctg545□ctg445□WAG-90L21  
ctg223□ctg545□ctg445□WAG-92I1  
ctg223□ctg545□ctg445□WAG-124A16  
ctg2230□□□WAG-26F19  
ctg2230□□□WAG-111P13  
ctg2230□ctg4834□ctg5106□WAG-46O6  
ctg2230□ctg4834□ctg5106□WAG-67I24  
ctg2231□□□WAG-84C6  
ctg2231□ctg4945□ctg5314□WAG-19F10  
ctg2231□ctg4945□ctg5314□WAG-33B10  
ctg2232□ctg4073□ctg4345□WAG-21M21  
ctg2232□ctg4073□ctg4345□WAG-88D15  
ctg2233□ctg4076□ctg4350□WAG-35N21  
ctg2233□ctg4076□ctg4350□WAG-96F23  
ctg2234□ctg4078□ctg4358□WAG-34B15  
ctg2234□ctg4078□ctg4358□WAG-39I18  
ctg2234□ctg4078□ctg4358□WAG-57F22  
ctg2235□□□WAG-1M20  
ctg2235□□□WAG-41D11  
ctg2235□□□WAG-126P18  
ctg2235□ctg6206□□WAG-23G14  
ctg2235□ctg6206□□WAG-85H6  
ctg2236□ctg4081□□WAG-73N6  
ctg2236□ctg4081□ctg5812□WAG-50F23  
ctg2236□ctg4081□ctg5812□WAG-58D19  
ctg2237□ctg4083□□WAG-59J10  
ctg2237□ctg4083□ctg5589□WAG-104I11  
ctg2237□ctg4083□ctg5589□WAG-108N6  
ctg2238□ctg4085□□WAG-93I9  
ctg2238□ctg4085□ctg6149□WAG-37N21  
ctg2238□ctg4085□ctg6149□WAG-127H5  
ctg2239□□□WAG-116L4  
ctg2239□ctg4961□ctg5367□WAG-23A14  
ctg2239□ctg4961□ctg5367□WAG-95F16  
ctg2239□ctg5973□□WAG-65B4  
ctg2239□ctg5973□□WAG-78C8  
ctg224□ctg689□ctg734□WAG-8G20  
ctg224□ctg689□ctg734□WAG-15P7  
ctg224□ctg689□ctg734□WAG-33K12  
ctg224□ctg689□ctg734□WAG-38N11  
ctg224□ctg689□ctg734□WAG-41J24  
ctg224□ctg689□ctg734□WAG-58F16  
ctg224□ctg689□ctg734□WAG-83O3  
ctg224□ctg689□ctg734□WAG-110F10  
ctg2240□□□WAG-63H20

ctg2240□ctg4821□ctg5090□WAG-102J1  
ctg2240□ctg4821□ctg5090□WAG-124J22  
ctg2240□ctg6327□□WAG-6K10  
ctg2240□ctg6327□□WAG-10E15  
ctg2241□ctg4716□ctg4894□WAG-100M13  
ctg2241□ctg4716□ctg4894□WAG-102A11  
ctg2241□ctg6108□□WAG-15K15  
ctg2241□ctg6108□□WAG-99A8  
ctg2242□ctg4090□ctg4359□WAG-70E1  
ctg2242□ctg4090□ctg4359□WAG-125E7  
ctg2243□□□WAG-99K14  
ctg2243□ctg4092□ctg4363□WAG-27G20  
ctg2243□ctg4092□ctg4363□WAG-32H19  
ctg2243□ctg4092□ctg4363□WAG-61L4  
ctg2244□□□WAG-1P24  
ctg2244□ctg4833□ctg5104□WAG-103B24  
ctg2244□ctg4833□ctg5104□WAG-130C4  
ctg2245□ctg4093□□WAG-84B13  
ctg2245□ctg4093□ctg5483□WAG-22H17  
ctg2245□ctg4093□ctg5483□WAG-118H10  
ctg2246□□□WAG-41H2  
ctg2246□□□WAG-52N17  
ctg2246□ctg4790□□WAG-77D5  
ctg2246□ctg4790□□WAG-82F11  
ctg2246□ctg4790□□WAG-129A10  
ctg2247□□□WAG-44D14  
ctg2247□□□WAG-105G2  
ctg2247□ctg6232□□WAG-13P5  
ctg2247□ctg6232□□WAG-99P16  
ctg2248□□□WAG-110G13  
ctg2248□ctg4836□□WAG-14E15  
ctg2248□ctg4836□□WAG-65I11  
ctg2248□ctg4836□□WAG-77B20  
ctg2249□□□WAG-12H20  
ctg2249□ctg4421□□WAG-8E16  
ctg2249□ctg4421□ctg6730□WAG-2J6  
ctg2249□ctg4421□ctg6730□WAG-109M13  
ctg225□ctg551□ctg1428□WAG-2D23  
ctg225□ctg551□ctg1428□WAG-15B1  
ctg225□ctg551□ctg1428□WAG-44E3  
ctg225□ctg551□ctg1428□WAG-78D19  
ctg225□ctg551□ctg1428□WAG-78P4  
ctg225□ctg551□ctg1428□WAG-83B24  
ctg225□ctg551□ctg1428□WAG-93J11  
ctg225□ctg551□ctg1428□WAG-112N19  
ctg2250□□□WAG-97L24  
ctg2250□□□WAG-111C21  
ctg2250□□□WAG-111D21  
ctg2250□ctg6217□□WAG-14D2  
ctg2250□ctg6217□□WAG-34E22  
ctg2251□ctg4096□□WAG-11P23  
ctg2251□ctg4096□ctg6199□WAG-83B13  
ctg2251□ctg4096□ctg6199□WAG-125H1  
ctg2252□□□WAG-127C14  
ctg2252□ctg4966□ctg5378□WAG-109F7  
ctg2252□ctg4966□ctg5378□WAG-126A22

ctg2253□□□WAG-115C20  
ctg2253□ctg4974□ctg5399□WAG-63K22  
ctg2253□ctg4974□ctg5399□WAG-76I13  
ctg2254□ctg4103□ctg4367□WAG-69J16  
ctg2254□ctg4103□ctg4367□WAG-110N9  
ctg2255□ctg4104□ctg4370□WAG-9D24  
ctg2255□ctg4104□ctg4370□WAG-45P13  
ctg2255□ctg4104□ctg4370□WAG-72D8  
ctg2256□ctg4106□□WAG-44N13  
ctg2256□ctg4106□ctg5770□WAG-11O20  
ctg2256□ctg4106□ctg5770□WAG-88I4  
ctg2257□□□WAG-98E18  
ctg2257□□□WAG-128H6  
ctg2257□ctg6302□□WAG-35F20  
ctg2257□ctg6302□□WAG-74C4  
ctg2258□□□WAG-28E5  
ctg2258□□□WAG-32F2  
ctg2258□ctg4375□□WAG-56D12  
ctg2258□ctg4375□ctg6346□WAG-16P6  
ctg2258□ctg4375□ctg6346□WAG-18E12  
ctg2259□ctg4107□ctg6120□WAG-46H21  
ctg2259□ctg4107□ctg6120□WAG-114G3  
ctg2259□ctg4107□ctg6340□WAG-33M18  
ctg2259□ctg4107□ctg6340□WAG-72G22  
ctg226□ctg2671□ctg2645□WAG-1E4  
ctg226□ctg2671□ctg2645□WAG-30C9  
ctg226□ctg2671□ctg2645□WAG-49C24  
ctg226□ctg2671□ctg2645□WAG-104L12  
ctg226□ctg555□□WAG-104F9  
ctg226□ctg555□ctg458□WAG-46K10  
ctg226□ctg555□ctg458□WAG-92C17  
ctg226□ctg555□ctg458□WAG-103M22  
ctg226□ctg555□ctg458□WAG-114K23  
ctg226□ctg555□ctg458□WAG-129H8  
ctg226□ctg555□ctg458□WAG-129J15  
ctg2260□ctg4113□□WAG-18I2  
ctg2260□ctg4113□ctg5991□WAG-40O15  
ctg2260□ctg4113□ctg5991□WAG-52J2  
ctg2261□□□WAG-37N4  
ctg2261□ctg4927□ctg5280□WAG-105H9  
ctg2261□ctg4927□ctg5280□WAG-125K4  
ctg2262□□□WAG-59B23  
ctg2262□ctg4997□ctg5446□WAG-76M6  
ctg2262□ctg4997□ctg5446□WAG-92D6  
ctg2263□□□WAG-5D8  
ctg2263□□□WAG-8E9  
ctg2263□ctg4859□ctg5143□WAG-85A2  
ctg2263□ctg4859□ctg5143□WAG-102J11  
ctg2264□ctg4117□ctg4376□WAG-91O20  
ctg2264□ctg4117□ctg4376□WAG-102H13  
ctg2265□ctg4118□ctg4377□WAG-3K1  
ctg2265□ctg4118□ctg4377□WAG-80L20  
ctg2266□□□WAG-20O17  
ctg2266□ctg4866□□WAG-7I12  
ctg2266□ctg4866□□WAG-35J13  
ctg2266□ctg4866□□WAG-80P2



ctg2267□ctg4124□ctg5776□WAG-114E9  
ctg2267□ctg4124□ctg5776□WAG-127A1  
ctg2267□ctg4124□ctg6933□WAG-35E4  
ctg2267□ctg4124□ctg6933□WAG-62B9  
ctg2268□ctg4127□□WAG-73E14  
ctg2268□ctg4127□ctg5785□WAG-52I22  
ctg2268□ctg4127□ctg5785□WAG-113P12  
ctg2269□□□WAG-65N10  
ctg2269□□□WAG-76P19  
ctg2269□□□WAG-84L23  
ctg2269□ctg6333□□WAG-94K7  
ctg2269□ctg6333□□WAG-123J1  
ctg227□ctg566□□WAG-55A12  
ctg227□ctg566□□WAG-74K24  
ctg227□ctg566□□WAG-81E20  
ctg227□ctg566□ctg973□WAG-9L17  
ctg227□ctg566□ctg973□WAG-16G8  
ctg227□ctg566□ctg973□WAG-27A12  
ctg227□ctg566□ctg973□WAG-82I8  
ctg227□ctg566□ctg973□WAG-94I3  
ctg227□ctg566□ctg973□WAG-105B1  
ctg227□ctg566□ctg973□WAG-106F19  
ctg2270□□□WAG-40O19  
ctg2270□□□WAG-95B16  
ctg2270□□□WAG-102M6  
ctg2270□□□WAG-111F19  
ctg2271□ctg4134□□WAG-5K16  
ctg2271□ctg4134□ctg6217□WAG-15O5  
ctg2271□ctg4134□ctg6217□WAG-54E11  
ctg2272□□□WAG-26D8  
ctg2272□ctg5014□ctg5493□WAG-73H8  
ctg2272□ctg5014□ctg5493□WAG-118G12  
ctg2273□□□WAG-30J21  
ctg2273□□□WAG-60B12  
ctg2273□ctg5017□ctg5504□WAG-30I11  
ctg2273□ctg5017□ctg5504□WAG-91P8  
ctg2274□□□WAG-9G3  
ctg2274□ctg5018□ctg5505□WAG-46O12  
ctg2274□ctg5018□ctg5505□WAG-89P14  
ctg2275□□□WAG-52C9  
ctg2275□ctg4920□ctg5261□WAG-20D6  
ctg2275□ctg4920□ctg5261□WAG-67L15  
ctg2276□□□WAG-112M2  
ctg2276□□□WAG-125E18  
ctg2276□ctg4990□ctg5433□WAG-28I8  
ctg2276□ctg4990□ctg5433□WAG-122E7  
ctg2277□□□WAG-8L6  
ctg2277□ctg4824□ctg5096□WAG-56B22  
ctg2277□ctg4824□ctg5096□WAG-63M13  
ctg2278□ctg4641□□WAG-40E10  
ctg2278□ctg4641□□WAG-107D13  
ctg2278□ctg4641□□WAG-109M1  
ctg2278□ctg6511□□WAG-21A8  
ctg2278□ctg6511□□WAG-101C8  
ctg2279□□□WAG-19B1  
ctg2279□□□WAG-91M18

ctg2279□□□WAG-107E14  
ctg2279□ctg5839□ctg6915□WAG-37E9  
ctg2279□ctg5839□ctg6915□WAG-128F17  
ctg228□□□WAG-2B3  
ctg228□□□WAG-18B15  
ctg228□□□WAG-63G4  
ctg228□ctg4028□ctg5579□WAG-120I10  
ctg228□ctg4028□ctg5579□WAG-120M2  
ctg228□ctg4028□ctg5922□WAG-57M23  
ctg228□ctg4028□ctg5922□WAG-77I2  
ctg228□ctg705□ctg1247□WAG-14N3  
ctg228□ctg705□ctg1247□WAG-53H10  
ctg228□ctg705□ctg1247□WAG-91G17  
ctg228□ctg705□ctg1247□WAG-100C3  
ctg228□ctg705□ctg1247□WAG-113E4  
ctg228□ctg705□ctg2887□WAG-49D11  
ctg228□ctg705□ctg2887□WAG-82C3  
ctg228□ctg705□ctg2887□WAG-104L10  
ctg228□ctg705□ctg3870□WAG-4B10  
ctg228□ctg705□ctg3870□WAG-91E23  
ctg228□ctg705□ctg3870□WAG-122G4  
ctg2280□ctg4137□ctg4393□WAG-20D4  
ctg2280□ctg4137□ctg4393□WAG-76J8  
ctg2281□ctg4139□ctg4395□WAG-15P6  
ctg2281□ctg4139□ctg4395□WAG-15P14  
ctg2282□□□WAG-111I16  
ctg2282□ctg4882□ctg5189□WAG-51P8  
ctg2282□ctg4882□ctg5189□WAG-75G1  
ctg2283□□□WAG-125P12  
ctg2283□ctg4144□□WAG-70F3  
ctg2283□ctg4144□ctg5854□WAG-78A21  
ctg2283□ctg4144□ctg5854□WAG-94I5  
ctg2284□□□WAG-86C4  
ctg2284□ctg4991□ctg5436□WAG-113I12  
ctg2284□ctg4991□ctg5436□WAG-113J12  
ctg2285□□□WAG-116C6  
ctg2285□ctg5039□ctg5546□WAG-57P6  
ctg2285□ctg5039□ctg5546□WAG-92M18  
ctg2286□□□WAG-76E8  
ctg2286□□□WAG-101J12  
ctg2286□ctg5899□□WAG-64J16  
ctg2286□ctg5899□□WAG-95M17  
ctg2287□□□WAG-122L6  
ctg2287□ctg4890□ctg5214□WAG-44N8  
ctg2287□ctg4890□ctg5214□WAG-86H5  
ctg2288□□□WAG-85D14  
ctg2288□ctg4902□ctg5231□WAG-18H10  
ctg2288□ctg4902□ctg5231□WAG-83E9  
ctg2289□ctg4154□□WAG-100G8  
ctg2289□ctg4154□ctg5924□WAG-52C5  
ctg2289□ctg4154□ctg5924□WAG-113P10  
ctg229□ctg558□□WAG-68O11  
ctg229□ctg558□ctg749□WAG-34H8  
ctg229□ctg558□ctg749□WAG-35H5  
ctg229□ctg558□ctg749□WAG-55G10  
ctg229□ctg558□ctg749□WAG-74J11

ctg229□ctg558□ctg749□WAG-80F14  
ctg229□ctg558□ctg749□WAG-82F10  
ctg229□ctg558□ctg749□WAG-114G17  
ctg229□ctg558□ctg749□WAG-125E17  
ctg229□ctg558□ctg749□WAG-127H9  
ctg2290□ctg4158□□WAG-39L8  
ctg2290□ctg4158□ctg5939□WAG-15N18  
ctg2290□ctg4158□ctg5939□WAG-28A16  
ctg2291□□□WAG-8F21  
ctg2291□□□WAG-18I14  
ctg2291□□□WAG-48O13  
ctg2291□ctg6423□□WAG-96H2  
ctg2291□ctg6423□□WAG-114D20  
ctg2292□□□WAG-24C23  
ctg2292□□□WAG-39H24  
ctg2292□□□WAG-60I8  
ctg2292□□□WAG-106K15  
ctg2292□ctg6267□□WAG-8D17  
ctg2292□ctg6267□□WAG-100E6  
ctg2293□□□WAG-96A12  
ctg2293□ctg5708□□WAG-12E13  
ctg2293□ctg5708□□WAG-17I21  
ctg2293□ctg6430□□WAG-75P4  
ctg2293□ctg6430□□WAG-90J1  
ctg2294□□□WAG-96P17  
ctg2294□ctg4161□ctg4400□WAG-74B8  
ctg2294□ctg4161□ctg4400□WAG-89H2  
ctg2295□ctg4165□□WAG-61B6  
ctg2295□ctg4165□ctg6514□WAG-9F16  
ctg2295□ctg4165□ctg6514□WAG-23O16  
ctg2296□ctg4166□□WAG-50A23  
ctg2296□ctg4166□ctg6519□WAG-17F6  
ctg2296□ctg4166□ctg6519□WAG-108A17  
ctg2297□ctg4167□□WAG-14P4  
ctg2297□ctg4167□ctg6520□WAG-16E21  
ctg2297□ctg4167□ctg6520□WAG-37B8  
ctg2298□ctg4168□□WAG-42N5  
ctg2298□ctg4168□ctg6522□WAG-13J14  
ctg2298□ctg4168□ctg6522□WAG-58J10  
ctg2299□□□WAG-62E7  
ctg2299□□□WAG-101D2  
ctg2299□ctg5066□ctg5601□WAG-16D21  
ctg2299□ctg5066□ctg5601□WAG-16N3  
ctg23□ctg110□ctg4107□WAG-1P5  
ctg23□ctg110□ctg4107□WAG-24L13  
ctg23□ctg110□ctg4107□WAG-93M4  
ctg23□ctg110□ctg83□WAG-6M21  
ctg23□ctg110□ctg83□WAG-37L19  
ctg23□ctg110□ctg83□WAG-40E14  
ctg23□ctg110□ctg83□WAG-40I3  
ctg23□ctg110□ctg83□WAG-49F18  
ctg23□ctg110□ctg83□WAG-61D12  
ctg23□ctg110□ctg83□WAG-78G2  
ctg23□ctg110□ctg83□WAG-122J14  
ctg23□ctg110□ctg83□WAG-124I15  
ctg23□ctg110□ctg83□WAG-130A13

ctg230□□□WAG-27I13  
ctg230□ctg982□ctg826□WAG-11M22  
ctg230□ctg982□ctg826□WAG-17J11  
ctg230□ctg982□ctg826□WAG-17O11  
ctg230□ctg982□ctg826□WAG-36B10  
ctg230□ctg982□ctg826□WAG-49O4  
ctg230□ctg982□ctg826□WAG-57B10  
ctg230□ctg982□ctg826□WAG-104O9  
ctg230□ctg982□ctg826□WAG-104P24  
ctg230□ctg982□ctg826□WAG-105F23  
ctg230□ctg982□ctg826□WAG-118A17  
ctg230□ctg982□ctg826□WAG-129H10  
ctg2300□□□WAG-18G4  
ctg2300□ctg4914□ctg5252□WAG-31N7  
ctg2300□ctg4914□ctg5252□WAG-60A23  
ctg2301□□□WAG-18G1  
ctg2301□ctg6135□□WAG-38G19  
ctg2301□ctg6135□□WAG-87K17  
ctg2301□ctg6544□□WAG-55G13  
ctg2301□ctg6544□□WAG-103O14  
ctg2302□ctg4173□ctg4409□WAG-49P2  
ctg2302□ctg4173□ctg4409□WAG-77F4  
ctg2303□ctg4175□ctg4413□WAG-46C21  
ctg2303□ctg4175□ctg4413□WAG-67I17  
ctg2304□ctg4177□□WAG-45E3  
ctg2304□ctg4177□ctg6300□WAG-115G14  
ctg2304□ctg4177□ctg6300□WAG-119P19  
ctg2305□□□WAG-100J7  
ctg2305□ctg4183□□WAG-106E5  
ctg2305□ctg4183□ctg6556□WAG-70J3  
ctg2305□ctg4183□ctg6556□WAG-93M1  
ctg2306□□□WAG-119I9  
ctg2306□ctg5021□ctg5511□WAG-61M2  
ctg2306□ctg5021□ctg5511□WAG-121K24  
ctg2307□□□WAG-33O18  
ctg2307□ctg4701□ctg4873□WAG-86N11  
ctg2307□ctg4701□ctg4873□WAG-87A21  
ctg2308□□□WAG-65G10  
ctg2308□□□WAG-108O19  
ctg2308□ctg6170□□WAG-16J9  
ctg2308□ctg6170□□WAG-99O24  
ctg2309□ctg4188□□WAG-106K9  
ctg2309□ctg4188□ctg6002□WAG-61O16  
ctg2309□ctg4188□ctg6002□WAG-114I6  
ctg231□□□WAG-3G21  
ctg231□□□WAG-92O4  
ctg231□ctg4162□□WAG-28N24  
ctg231□ctg4162□ctg6294□WAG-53K8  
ctg231□ctg4162□ctg6294□WAG-127N9  
ctg231□ctg952□ctg1039□WAG-43A15  
ctg231□ctg952□ctg1039□WAG-43H9  
ctg231□ctg952□ctg1039□WAG-45H4  
ctg231□ctg952□ctg1039□WAG-57N10  
ctg231□ctg952□ctg1039□WAG-61M18  
ctg231□ctg952□ctg1039□WAG-66D19  
ctg231□ctg952□ctg1039□WAG-71G20

ctg231□ctg952□ctg1039□WAG-71H19  
ctg231□ctg952□ctg1039□WAG-82D6  
ctg231□ctg952□ctg1039□WAG-96A22  
ctg231□ctg952□ctg1039□WAG-113F20  
ctg231□ctg952□ctg4842□WAG-48K20  
ctg231□ctg952□ctg4842□WAG-92F23  
ctg2310□ctg4194□□WAG-9J2  
ctg2310□ctg4194□ctg6014□WAG-12E10  
ctg2310□ctg4194□ctg6014□WAG-85A24  
ctg2311□□□WAG-109P18  
ctg2311□□□WAG-117M23  
ctg2311□ctg6149□□WAG-21O15  
ctg2311□ctg6149□□WAG-38D23  
ctg2312□ctg4197□ctg4423□WAG-70L18  
ctg2312□ctg4197□ctg4423□WAG-95O16  
ctg2313□ctg4198□ctg4424□WAG-30J10  
ctg2313□ctg4198□ctg4424□WAG-93E22  
ctg2314□ctg4199□ctg4425□WAG-53H13  
ctg2314□ctg4199□ctg4425□WAG-75E20  
ctg2315□ctg4200□ctg4426□WAG-66G11  
ctg2315□ctg4200□ctg4426□WAG-83J7  
ctg2316□ctg4201□ctg4427□WAG-48O10  
ctg2316□ctg4201□ctg4427□WAG-60M8  
ctg2317□□□WAG-23C20  
ctg2317□□□WAG-28M14  
ctg2317□□□WAG-30G17  
ctg2317□□□WAG-102B22  
ctg2318□ctg4203□□WAG-94D9  
ctg2318□ctg4203□ctg6597□WAG-1H24  
ctg2318□ctg4203□ctg6597□WAG-118K1  
ctg2319□ctg4208□□WAG-108N18  
ctg2319□ctg4208□ctg6364□WAG-49E23  
ctg2319□ctg4208□ctg6364□WAG-117G21  
ctg2319□ctg4208□ctg6628□WAG-26C7  
ctg2319□ctg4208□ctg6628□WAG-83K16  
ctg232□ctg569□□WAG-13H13  
ctg232□ctg569□ctg812□WAG-50F22  
ctg232□ctg569□ctg812□WAG-62H17  
ctg232□ctg569□ctg812□WAG-73B10  
ctg232□ctg569□ctg812□WAG-97G7  
ctg232□ctg569□ctg812□WAG-108H15  
ctg232□ctg569□ctg812□WAG-108H17  
ctg232□ctg569□ctg812□WAG-119F22  
ctg2320□ctg4209□□WAG-72F22  
ctg2320□ctg4209□ctg6634□WAG-52I4  
ctg2320□ctg4209□ctg6634□WAG-72D12  
ctg2321□□□WAG-128L11  
ctg2321□ctg5058□ctg5586□WAG-89L1  
ctg2321□ctg5058□ctg5586□WAG-107A9  
ctg2322□□□WAG-22E20  
ctg2322□ctg5090□ctg5666□WAG-18A8  
ctg2322□ctg5090□ctg5666□WAG-28G20  
ctg2323□ctg4212□□WAG-47O7  
ctg2323□ctg4212□□WAG-68G21  
ctg2323□ctg4212□□WAG-94E18  
ctg2324□□□WAG-19H14

ctg2324□□□WAG-62F5  
ctg2324□□□WAG-102A20  
ctg2324□ctg4958□ctg5360□WAG-30M8  
ctg2324□ctg4958□ctg5360□WAG-45F5  
ctg2325□□□WAG-39H4  
ctg2325□ctg4960□ctg5366□WAG-23J11  
ctg2325□ctg4960□ctg5366□WAG-35F11  
ctg2325□ctg6263□□WAG-16P14  
ctg2325□ctg6263□□WAG-21D6  
ctg2326□□□WAG-27A15  
ctg2326□ctg4215□□WAG-92P20  
ctg2326□ctg4215□ctg6069□WAG-88O22  
ctg2326□ctg4215□ctg6069□WAG-108J8  
ctg2327□□□WAG-66D24  
ctg2327□ctg4446□□WAG-81C18  
ctg2327□ctg4446□□WAG-101L10  
ctg2327□ctg4446□□WAG-109B23  
ctg2328□□□WAG-71G21  
ctg2328□□□WAG-83E23  
ctg2328□ctg5093□ctg5672□WAG-98A20  
ctg2328□ctg5093□ctg5672□WAG-116E11  
ctg2329□ctg4225□ctg4433□WAG-91I24  
ctg2329□ctg4225□ctg4433□WAG-97P17  
ctg233□ctg572□ctg625□WAG-14G4  
ctg233□ctg572□ctg625□WAG-33L14  
ctg233□ctg572□ctg625□WAG-60O15  
ctg233□ctg572□ctg625□WAG-92I9  
ctg233□ctg572□ctg625□WAG-103D1  
ctg233□ctg572□ctg625□WAG-115F6  
ctg233□ctg572□ctg625□WAG-127M4  
ctg2330□□□WAG-68N8  
ctg2330□□□WAG-73M20  
ctg2330□□□WAG-103N12  
ctg2330□□□WAG-104G12  
ctg2330□□□WAG-127K5  
ctg2331□ctg4228□□WAG-97M3  
ctg2331□ctg4228□ctg6326□WAG-65H3  
ctg2331□ctg4228□ctg6326□WAG-105I16  
ctg2332□ctg4230□□WAG-6F12  
ctg2332□ctg4230□ctg6689□WAG-13O14  
ctg2332□ctg4230□ctg6689□WAG-87N19  
ctg2333□ctg4231□□WAG-106N11  
ctg2333□ctg4231□ctg6700□WAG-66D6  
ctg2333□ctg4231□ctg6700□WAG-113N14  
ctg2334□□□WAG-60P21  
ctg2334□□□WAG-68H20  
ctg2334□ctg6227□□WAG-99K20  
ctg2334□ctg6227□□WAG-109D19  
ctg2335□□□WAG-87C6  
ctg2335□ctg4706□□WAG-19K14  
ctg2335□ctg4706□□WAG-50N10  
ctg2335□ctg4706□□WAG-93O17  
ctg2336□□□WAG-47I19  
ctg2336□ctg4968□ctg5381□WAG-112A5  
ctg2336□ctg4968□ctg5381□WAG-119I13  
ctg2337□□□WAG-22M19

ctg2337□ctg4234□□WAG-7G21  
ctg2337□ctg4234□ctg5783□WAG-80E16  
ctg2337□ctg4234□ctg5783□WAG-121F15  
ctg2338□□□WAG-44A2  
ctg2338□□□WAG-67N10  
ctg2338□ctg6541□□WAG-7N1  
ctg2338□ctg6541□□WAG-35I22  
ctg2339□ctg4238□□WAG-74K9  
ctg2339□ctg4238□ctg6150□WAG-33I5  
ctg2339□ctg4238□ctg6150□WAG-118E10  
ctg234□□□WAG-43N11  
ctg234□□□WAG-81L14  
ctg234□ctg816□ctg863□WAG-13F5  
ctg234□ctg816□ctg863□WAG-48L24  
ctg234□ctg816□ctg863□WAG-79M15  
ctg234□ctg816□ctg863□WAG-90B15  
ctg234□ctg816□ctg863□WAG-95I8  
ctg234□ctg816□ctg863□WAG-101N20  
ctg234□ctg816□ctg863□WAG-116E15  
ctg2340□ctg4245□ctg4444□WAG-30B24  
ctg2340□ctg4245□ctg4444□WAG-120J8  
ctg2341□□□WAG-36L19  
ctg2341□ctg5108□ctg5707□WAG-47K15  
ctg2341□ctg5108□ctg5707□WAG-112H17  
ctg2342□ctg4246□ctg4446□WAG-34C12  
ctg2342□ctg4246□ctg4446□WAG-94B22  
ctg2343□ctg4247□ctg4448□WAG-88L13  
ctg2343□ctg4247□ctg4448□WAG-127F14  
ctg2344□□□WAG-23F22  
ctg2344□ctg5113□ctg5724□WAG-67D9  
ctg2344□ctg5113□ctg5724□WAG-78G6  
ctg2345□ctg4250□ctg4451□WAG-65O4  
ctg2345□ctg4250□ctg4451□WAG-108I4  
ctg2346□ctg4253□ctg4454□WAG-31I16  
ctg2346□ctg4253□ctg4454□WAG-123P19  
ctg2347□ctg4255□ctg4458□WAG-4J13  
ctg2347□ctg4255□ctg4458□WAG-5L13  
ctg2348□□□WAG-129N22  
ctg2348□ctg5088□ctg5664□WAG-32B7  
ctg2348□ctg5088□ctg5664□WAG-43F13  
ctg2349□□□WAG-4H1  
ctg2349□ctg4711□□WAG-3G13  
ctg2349□ctg4711□□WAG-78C9  
ctg2349□ctg4711□□WAG-119J3  
ctg235□□□WAG-21C3  
ctg235□□□WAG-46F16  
ctg235□□□WAG-110P7  
ctg235□ctg1271□ctg1110□WAG-8N11  
ctg235□ctg1271□ctg1110□WAG-21I12  
ctg235□ctg1271□ctg1110□WAG-102B16  
ctg235□ctg1271□ctg1110□WAG-108F14  
ctg235□ctg1271□ctg1110□WAG-112F17  
ctg235□ctg576□ctg467□WAG-5E24  
ctg235□ctg576□ctg467□WAG-41P24  
ctg235□ctg576□ctg467□WAG-50E20  
ctg235□ctg576□ctg467□WAG-57H14

ctg235□ctg576□ctg467□WAG-58B4  
ctg235□ctg576□ctg467□WAG-70D3  
ctg235□ctg576□ctg467□WAG-76M3  
ctg235□ctg576□ctg467□WAG-79E24  
ctg235□ctg576□ctg467□WAG-80L2  
ctg235□ctg576□ctg467□WAG-87O3  
ctg235□ctg576□ctg467□WAG-99K6  
ctg235□ctg6368□□WAG-61K23  
ctg235□ctg6368□□WAG-124N1  
ctg2350□□□WAG-21D4  
ctg2350□□□WAG-85J1  
ctg2350□ctg4918□ctg5258□WAG-31P9  
ctg2350□ctg4918□ctg5258□WAG-106L1  
ctg2351□□□WAG-66N3  
ctg2351□ctg4955□ctg5348□WAG-71F4  
ctg2351□ctg4955□ctg5348□WAG-86G3  
ctg2352□ctg4265□□WAG-47H5  
ctg2352□ctg4265□ctg5983□WAG-22N1  
ctg2352□ctg4265□ctg5983□WAG-45F16  
ctg2353□ctg4266□□WAG-73M9  
ctg2353□ctg4266□ctg5613□WAG-22A17  
ctg2353□ctg4266□ctg5613□WAG-31J13  
ctg2354□ctg4267□□WAG-10G6  
ctg2354□ctg4267□ctg5910□WAG-3H1  
ctg2354□ctg4267□ctg5910□WAG-79P9  
ctg2355□□□WAG-35H21  
ctg2355□□□WAG-107M18  
ctg2355□ctg6487□□WAG-89A24  
ctg2355□ctg6487□□WAG-107O17  
ctg2356□ctg4270□ctg4461□WAG-88O13  
ctg2356□ctg4270□ctg4461□WAG-125D12  
ctg2357□ctg4273□ctg4469□WAG-22K13  
ctg2357□ctg4273□ctg4469□WAG-79E21  
ctg2358□ctg4274□ctg4470□WAG-65B12  
ctg2358□ctg4274□ctg4470□WAG-71D16  
ctg2359□ctg4275□ctg4472□WAG-42D4  
ctg2359□ctg4275□ctg4472□WAG-62I4  
ctg236□□□WAG-16K1  
ctg236□ctg722□ctg1993□WAG-13K12  
ctg236□ctg722□ctg1993□WAG-35N16  
ctg236□ctg722□ctg1993□WAG-58J17  
ctg236□ctg722□ctg1993□WAG-67C16  
ctg236□ctg722□ctg1993□WAG-72M22  
ctg236□ctg722□ctg1993□WAG-85C2  
ctg236□ctg722□ctg1993□WAG-110D3  
ctg236□ctg722□ctg1993□WAG-129N4  
ctg236□ctg722□ctg792□WAG-43H13  
ctg236□ctg722□ctg792□WAG-46P11  
ctg236□ctg722□ctg792□WAG-67H10  
ctg236□ctg722□ctg792□WAG-74F17  
ctg236□ctg722□ctg792□WAG-90L14  
ctg236□ctg722□ctg792□WAG-95M9  
ctg236□ctg722□ctg792□WAG-122L4  
ctg2360□ctg4276□ctg4475□WAG-51C20  
ctg2360□ctg4276□ctg4475□WAG-54C1  
ctg2361□□□WAG-15J2



ctg2361□□□WAG-25A5  
ctg2361□□□WAG-59E24  
ctg2361□□□WAG-84M2  
ctg2361□ctg4508□□WAG-113C20  
ctg2361□ctg4508□ctg6272□WAG-72M16  
ctg2361□ctg4508□ctg6272□WAG-102L18  
ctg2361□ctg5671□ctg6849□WAG-28J3  
ctg2361□ctg5671□ctg6849□WAG-64A23  
ctg2362□ctg4278□□WAG-63B22  
ctg2362□ctg4278□ctg6584□WAG-18B4  
ctg2362□ctg4278□ctg6584□WAG-127L18  
ctg2362□ctg5396□ctg6379□WAG-28C7  
ctg2362□ctg5396□ctg6379□WAG-96P9  
ctg2363□□□WAG-80D6  
ctg2363□ctg5012□ctg5490□WAG-42E4  
ctg2363□ctg5012□ctg5490□WAG-123A20  
ctg2364□□□WAG-104G3  
ctg2364□ctg5027□ctg5522□WAG-11I14  
ctg2364□ctg5027□ctg5522□WAG-14D13  
ctg2365□□□WAG-12C5  
ctg2365□ctg4286□□WAG-104K15  
ctg2365□ctg4286□ctg6138□WAG-55F3  
ctg2365□ctg4286□ctg6138□WAG-118A6  
ctg2366□ctg4288□□WAG-3M17  
ctg2366□ctg4288□ctg5885□WAG-88L22  
ctg2366□ctg4288□ctg5885□WAG-118K13  
ctg2367□□□WAG-34I10  
ctg2367□□□WAG-56M22  
ctg2367□□□WAG-68G24  
ctg2367□ctg6409□□WAG-42D5  
ctg2367□ctg6409□□WAG-70K3  
ctg2368□□□WAG-50O19  
ctg2368□□□WAG-130O5  
ctg2368□ctg6340□□WAG-31G18  
ctg2368□ctg6340□□WAG-94I11  
ctg2369□ctg4292□□WAG-19K12  
ctg2369□ctg4292□ctg6251□WAG-86L15  
ctg2369□ctg4292□ctg6251□WAG-107N10  
ctg237□ctg2245□ctg2152□WAG-106C1  
ctg237□ctg2245□ctg2152□WAG-106K7  
ctg237□ctg2245□ctg2152□WAG-126H14  
ctg237□ctg724□□WAG-25O7  
ctg237□ctg724□ctg3124□WAG-85G12  
ctg237□ctg724□ctg3124□WAG-90I8  
ctg237□ctg724□ctg3124□WAG-106O13  
ctg237□ctg724□ctg595□WAG-15C9  
ctg237□ctg724□ctg595□WAG-18G15  
ctg237□ctg724□ctg595□WAG-39N3  
ctg237□ctg724□ctg595□WAG-48F24  
ctg237□ctg724□ctg595□WAG-58O17  
ctg237□ctg724□ctg595□WAG-70D12  
ctg237□ctg724□ctg595□WAG-108A14  
ctg2370□ctg4294□ctg4485□WAG-80M12  
ctg2370□ctg4294□ctg4485□WAG-121L4  
ctg2371□□□WAG-111G24  
ctg2371□ctg5150□ctg5813□WAG-48B24

ctg2371□ctg5150□ctg5813□WAG-92J19  
ctg2372□ctg4299□□WAG-116O21  
ctg2372□ctg4299□ctg5814□WAG-44J9  
ctg2372□ctg4299□ctg5814□WAG-79O11  
ctg2373□ctg4300□ctg4495□WAG-21H11  
ctg2373□ctg4300□ctg4495□WAG-26D9  
ctg2374□ctg4302□ctg4498□WAG-4G12  
ctg2374□ctg4302□ctg4498□WAG-7I7  
ctg2375□ctg4303□□WAG-117F12  
ctg2375□ctg4303□ctg6388□WAG-90L7  
ctg2375□ctg4303□ctg6388□WAG-120L13  
ctg2376□□□WAG-78P7  
ctg2376□ctg5029□ctg5526□WAG-77O1  
ctg2376□ctg5029□ctg5526□WAG-79N11  
ctg2377□ctg4308□□WAG-22B15  
ctg2377□ctg4308□□WAG-70O24  
ctg2377□ctg4308□□WAG-76E17  
ctg2378□ctg4313□ctg4506□WAG-51B2  
ctg2378□ctg4313□ctg4506□WAG-52H21  
ctg2379□□□WAG-38N7  
ctg2379□□□WAG-94L8  
ctg2379□ctg4318□□WAG-51P10  
ctg2379□ctg4318□ctg6740□WAG-80I12  
ctg2379□ctg4318□ctg6740□WAG-89K17  
ctg238□□□WAG-4D1  
ctg238□ctg3339□□WAG-104N20  
ctg238□ctg3339□ctg3401□WAG-84B15  
ctg238□ctg3339□ctg3401□WAG-128M15  
ctg238□ctg847□□WAG-42F22  
ctg238□ctg847□ctg1572□WAG-25F22  
ctg238□ctg847□ctg1572□WAG-32D17  
ctg238□ctg847□ctg1572□WAG-62L15  
ctg238□ctg847□ctg1572□WAG-70B11  
ctg238□ctg847□ctg1572□WAG-87I5  
ctg238□ctg847□ctg1572□WAG-115D23  
ctg238□ctg847□ctg1572□WAG-115P12  
ctg238□ctg847□ctg1572□WAG-127B18  
ctg2380□ctg4320□□WAG-36P6  
ctg2380□ctg4320□ctg6868□WAG-31G11  
ctg2380□ctg4320□ctg6868□WAG-56L23  
ctg2381□□□WAG-127C10  
ctg2381□ctg5177□ctg5877□WAG-27J9  
ctg2381□ctg5177□ctg5877□WAG-73E13  
ctg2382□ctg4323□□WAG-88K10  
ctg2382□ctg4323□□WAG-97O3  
ctg2382□ctg4323□□WAG-124I18  
ctg2383□ctg4326□□WAG-58L18  
ctg2383□ctg4326□ctg6881□WAG-36J10  
ctg2383□ctg4326□ctg6881□WAG-48N16  
ctg2384□□□WAG-94K1  
ctg2384□ctg5054□ctg5582□WAG-58I6  
ctg2384□ctg5054□ctg5582□WAG-117A1  
ctg2385□ctg4328□□WAG-95B8  
ctg2385□ctg4328□ctg6374□WAG-103H24  
ctg2385□ctg4328□ctg6374□WAG-124M21  
ctg2386□ctg4330□□WAG-73K23

ctg2386□ctg4330□ctg6407□WAG-57I20  
ctg2386□ctg4330□ctg6407□WAG-66K19  
ctg2387□□□WAG-20G24  
ctg2387□ctg5181□ctg5881□WAG-104I9  
ctg2387□ctg5181□ctg5881□WAG-127C20  
ctg2388□□□WAG-63O3  
ctg2388□ctg5171□ctg5867□WAG-37N11  
ctg2388□ctg5171□ctg5867□WAG-113I3  
ctg2389□□□WAG-24C21  
ctg2389□ctg5138□ctg5780□WAG-83E16  
ctg2389□ctg5138□ctg5780□WAG-122O2  
ctg2389□ctg5523□ctg6651□WAG-17F23  
ctg2389□ctg5523□ctg6651□WAG-45J20  
ctg239□□□WAG-109F8  
ctg239□ctg2020□□□WAG-58E17  
ctg239□ctg2020□ctg2441□WAG-52N9  
ctg239□ctg2020□ctg2441□WAG-68C16  
ctg239□ctg2020□ctg2441□WAG-83H18  
ctg239□ctg2020□ctg4715□WAG-35D5  
ctg239□ctg2020□ctg4715□WAG-70H13  
ctg239□ctg824□ctg4144□WAG-19J19  
ctg239□ctg824□ctg4144□WAG-99B20  
ctg239□ctg824□ctg4144□WAG-125G1  
ctg239□ctg824□ctg5913□WAG-76K9  
ctg239□ctg824□ctg5913□WAG-112H9  
ctg239□ctg824□ctg845□WAG-19D23  
ctg239□ctg824□ctg845□WAG-28D3  
ctg239□ctg824□ctg845□WAG-52J1  
ctg239□ctg824□ctg845□WAG-53M19  
ctg239□ctg824□ctg845□WAG-54L14  
ctg239□ctg824□ctg845□WAG-60A4  
ctg239□ctg824□ctg845□WAG-64G17  
ctg239□ctg824□ctg845□WAG-77N17  
ctg239□ctg824□ctg845□WAG-96F20  
ctg239□ctg824□ctg845□WAG-128H9  
ctg239□ctg824□ctg845□WAG-129L6  
ctg2390□ctg4339□□□WAG-32O16  
ctg2390□ctg4339□ctg5861□WAG-52B9  
ctg2390□ctg4339□ctg5861□WAG-81F14  
ctg2391□□□WAG-117H23  
ctg2391□ctg5196□ctg5911□WAG-31F22  
ctg2391□ctg5196□ctg5911□WAG-78O2  
ctg2392□□□WAG-14L9  
ctg2392□ctg5198□ctg5915□WAG-68I20  
ctg2392□ctg5198□ctg5915□WAG-72N16  
ctg2393□□□WAG-63O10  
ctg2393□ctg5210□ctg5945□WAG-13O12  
ctg2393□ctg5210□ctg5945□WAG-32J9  
ctg2394□ctg4342□ctg4528□WAG-4N16  
ctg2394□ctg4342□ctg4528□WAG-115C23  
ctg2395□□□WAG-43O12  
ctg2395□□□WAG-115C14  
ctg2395□□□WAG-118N21  
ctg2395□□□WAG-129N9  
ctg2396□ctg4344□□□WAG-56M14  
ctg2396□ctg4344□ctg6855□WAG-1A8

ctg2396□ctg4344□ctg6855□WAG-1B12  
ctg2397□□□WAG-58I23  
ctg2397□ctg4823□ctg5094□WAG-32G11  
ctg2397□ctg4823□ctg5094□WAG-102P17  
ctg2398□ctg5071□ctg5614□WAG-20O14  
ctg2398□ctg5071□ctg5614□WAG-100F14  
ctg2398□ctg5467□ctg6532□WAG-104A9  
ctg2398□ctg5467□ctg6532□WAG-116H8  
ctg2398□ctg6550□□WAG-3P24  
ctg2398□ctg6550□□WAG-29P1  
ctg2399□□□WAG-9C11  
ctg2399□□□WAG-49H20  
ctg2399□□□WAG-73E18  
ctg2399□□□WAG-95B20  
ctg2399□ctg5326□ctg6215□WAG-67E18  
ctg2399□ctg5326□ctg6215□WAG-75I3  
ctg24□ctg116□□WAG-4H15  
ctg24□ctg116□□WAG-30G22  
ctg24□ctg116□ctg95□WAG-17L19  
ctg24□ctg116□ctg95□WAG-22A23  
ctg24□ctg116□ctg95□WAG-58L11  
ctg24□ctg116□ctg95□WAG-60M13  
ctg24□ctg116□ctg95□WAG-87K3  
ctg24□ctg116□ctg95□WAG-96F9  
ctg24□ctg116□ctg95□WAG-96I18  
ctg24□ctg116□ctg95□WAG-102A14  
ctg24□ctg116□ctg95□WAG-107C24  
ctg24□ctg116□ctg95□WAG-117P14  
ctg24□ctg116□ctg95□WAG-123H22  
ctg240□□□WAG-119C17  
ctg240□ctg703□□WAG-19E24  
ctg240□ctg703□ctg5377□WAG-113F13  
ctg240□ctg703□ctg5377□WAG-127G12  
ctg240□ctg703□ctg627□WAG-23H5  
ctg240□ctg703□ctg627□WAG-24J8  
ctg240□ctg703□ctg627□WAG-84J10  
ctg240□ctg703□ctg627□WAG-87K14  
ctg240□ctg703□ctg627□WAG-91N13  
ctg240□ctg703□ctg6906□WAG-96H22  
ctg240□ctg703□ctg6906□WAG-130J17  
ctg2400□□□WAG-85P1  
ctg2400□ctg4345□□WAG-46D12  
ctg2400□ctg4345□ctg6891□WAG-17C18  
ctg2400□ctg4345□ctg6891□WAG-90F20  
ctg2401□ctg4346□□WAG-119F18  
ctg2401□ctg4346□ctg6329□WAG-61I24  
ctg2401□ctg4346□ctg6329□WAG-130C14  
ctg2402□□□WAG-33E18  
ctg2402□ctg4349□□WAG-98P14  
ctg2402□ctg4349□ctg6476□WAG-74P18  
ctg2402□ctg4349□ctg6476□WAG-86L10  
ctg2403□ctg4354□□WAG-20M23  
ctg2403□ctg4354□ctg6518□WAG-17J14  
ctg2403□ctg4354□ctg6518□WAG-54B6  
ctg2404□ctg4358□ctg4538□WAG-93K7  
ctg2404□ctg4358□ctg4538□WAG-115F16

ctg2405□ctg4359□ctg4540□WAG-62C12  
ctg2405□ctg4359□ctg4540□WAG-73I8  
ctg2406□ctg4360□ctg4541□WAG-54I9  
ctg2406□ctg4360□ctg4541□WAG-98J18  
ctg2407□□□WAG-20K14  
ctg2407□□□WAG-33G8  
ctg2407□□□WAG-36L2  
ctg2407□□□WAG-86C19  
ctg2408□□□WAG-8J10  
ctg2408□ctg5083□ctg5650□WAG-34O14  
ctg2408□ctg5083□ctg5650□WAG-126A10  
ctg2409□□□WAG-64L20  
ctg2409□ctg5084□ctg5651□WAG-5C3  
ctg2409□ctg5084□ctg5651□WAG-22O2  
ctg241□□□WAG-30L1  
ctg241□□□WAG-32A11  
ctg241□□□WAG-92C13  
ctg241□□□WAG-110N14  
ctg241□ctg4493□□WAG-14J6  
ctg241□ctg4493□□WAG-38J13  
ctg241□ctg4493□□WAG-91I2  
ctg241□ctg4493□□WAG-129A14  
ctg241□ctg5436□ctg6472□WAG-79I9  
ctg241□ctg5436□ctg6472□WAG-120C4  
ctg241□ctg854□ctg697□WAG-10I10  
ctg241□ctg854□ctg697□WAG-18K8  
ctg241□ctg854□ctg697□WAG-50H12  
ctg241□ctg854□ctg697□WAG-72L18  
ctg241□ctg854□ctg697□WAG-101A23  
ctg241□ctg854□ctg697□WAG-119E21  
ctg2410□ctg4366□□WAG-11H10  
ctg2410□ctg4366□□WAG-11J10  
ctg2410□ctg4366□□WAG-72L7  
ctg2411□□□WAG-121J17  
ctg2411□ctg4925□ctg5276□WAG-112E1  
ctg2411□ctg4925□ctg5276□WAG-121C9  
ctg2412□□□WAG-77F24  
ctg2412□ctg5073□ctg5621□WAG-76L7  
ctg2412□ctg5073□ctg5621□WAG-86M15  
ctg2413□ctg4369□□WAG-95P24  
ctg2413□ctg4369□ctg6534□WAG-37I7  
ctg2413□ctg4369□ctg6534□WAG-112D23  
ctg2414□ctg4370□□WAG-22J17  
ctg2414□ctg4370□ctg6349□WAG-10K5  
ctg2414□ctg4370□ctg6349□WAG-109M15  
ctg2415□ctg4373□□WAG-42J2  
ctg2415□ctg4373□ctg6558□WAG-64A14  
ctg2415□ctg4373□ctg6558□WAG-75J1  
ctg2416□ctg4376□□WAG-11M15  
ctg2416□ctg4376□ctg6586□WAG-12K4  
ctg2416□ctg4376□ctg6586□WAG-28B22  
ctg2417□ctg4377□ctg4546□WAG-49A22  
ctg2417□ctg4377□ctg4546□WAG-130B7  
ctg2418□ctg4384□ctg4557□WAG-87D21  
ctg2418□ctg4384□ctg4557□WAG-122O18  
ctg2419□ctg4385□ctg4558□WAG-5C11

ctg2419□ctg4385□ctg4558□WAG-86H19  
ctg242□□□WAG-89C12  
ctg242□ctg855□□WAG-16L6  
ctg242□ctg855□ctg3716□WAG-22J5  
ctg242□ctg855□ctg3716□WAG-52N3  
ctg242□ctg855□ctg700□WAG-5B9  
ctg242□ctg855□ctg700□WAG-24F21  
ctg242□ctg855□ctg700□WAG-64P14  
ctg242□ctg855□ctg700□WAG-65N3  
ctg242□ctg855□ctg700□WAG-74E23  
ctg242□ctg855□ctg700□WAG-74H16  
ctg242□ctg855□ctg700□WAG-112D6  
ctg2420□ctg4387□ctg4560□WAG-74K6  
ctg2420□ctg4387□ctg4560□WAG-76O21  
ctg2421□ctg4390□ctg4568□WAG-24K10  
ctg2421□ctg4390□ctg4568□WAG-128H15  
ctg2422□□□WAG-62G22  
ctg2422□ctg5098□ctg5686□WAG-22D9  
ctg2422□ctg5098□ctg5686□WAG-43C7  
ctg2423□□□WAG-49N7  
ctg2423□□□WAG-125N9  
ctg2423□ctg5100□ctg5689□WAG-34L12  
ctg2423□ctg5100□ctg5689□WAG-117J4  
ctg2424□ctg4391□□WAG-103O17  
ctg2424□ctg4391□□WAG-112E9  
ctg2424□ctg4391□□WAG-122O13  
ctg2425□ctg4392□□WAG-47A1  
ctg2425□ctg4392□□WAG-97I20  
ctg2425□ctg4392□□WAG-111C2  
ctg2426□ctg4395□□WAG-36B9  
ctg2426□ctg4395□ctg6932□WAG-58L23  
ctg2426□ctg4395□ctg6932□WAG-70C13  
ctg2427□ctg4398□□WAG-43E15  
ctg2427□ctg4398□ctg6397□WAG-78L15  
ctg2427□ctg4398□ctg6397□WAG-117I6  
ctg2428□ctg4404□ctg4574□WAG-25F20  
ctg2428□ctg4404□ctg4574□WAG-85G1  
ctg2429□ctg4405□ctg4575□WAG-22L7  
ctg2429□ctg4405□ctg4575□WAG-22M7  
ctg243□ctg591□ctg485□WAG-22I13  
ctg243□ctg591□ctg485□WAG-82F9  
ctg243□ctg591□ctg485□WAG-96D15  
ctg243□ctg591□ctg485□WAG-111G19  
ctg243□ctg591□ctg485□WAG-126O9  
ctg2430□□□WAG-92A23  
ctg2430□ctg5271□ctg6090□WAG-20B23  
ctg2430□ctg5271□ctg6090□WAG-60E18  
ctg2431□□□WAG-124L13  
ctg2431□ctg5281□ctg6112□WAG-32O20  
ctg2431□ctg5281□ctg6112□WAG-44L21  
ctg2432□ctg4407□□WAG-45N22  
ctg2432□ctg4407□□WAG-93P9  
ctg2432□ctg4407□□WAG-109D13  
ctg2433□□□WAG-71B19  
ctg2433□ctg5009□ctg5482□WAG-90N7  
ctg2433□ctg5009□ctg5482□WAG-100F11

ctg2434□□□WAG-23G1  
ctg2434□ctg5114□ctg5725□WAG-64I14  
ctg2434□ctg5114□ctg5725□WAG-109J7  
ctg2435□ctg4411□□WAG-11L10  
ctg2435□ctg4411□□WAG-46B23  
ctg2435□ctg4411□□WAG-65G2  
ctg2435□ctg4411□□WAG-66N18  
ctg2436□ctg4884□□WAG-65H21  
ctg2436□ctg4884□ctg6964□WAG-43J5  
ctg2436□ctg4884□ctg6964□WAG-73C23  
ctg2436□ctg6571□□WAG-10D10  
ctg2436□ctg6571□□WAG-116B9  
ctg2437□□□WAG-92O24  
ctg2437□ctg4417□□WAG-99F12  
ctg2437□ctg4417□ctg6511□WAG-12M4  
ctg2437□ctg4417□ctg6511□WAG-26P9  
ctg2438□□□WAG-67L5  
ctg2438□ctg5295□ctg6134□WAG-20L11  
ctg2438□ctg5295□ctg6134□WAG-61E12  
ctg2439□□□WAG-19O12  
ctg2439□□□WAG-53D15  
ctg2439□ctg6551□□WAG-63E8  
ctg2439□ctg6551□□WAG-115K14  
ctg244□□□WAG-11K1  
ctg244□□□WAG-74G24  
ctg244□□□WAG-86H7  
ctg244□□□WAG-102H22  
ctg244□□□WAG-112D20  
ctg244□ctg2112□□WAG-23P17  
ctg244□ctg2112□□WAG-102L21  
ctg244□ctg2112□ctg2393□WAG-G15  
ctg244□ctg2112□ctg2393□WAG-51G10  
ctg244□ctg2112□ctg2393□WAG-65N21  
ctg244□ctg2112□ctg2393□WAG-82N11  
ctg244□ctg3604□ctg3783□WAG-53K3  
ctg244□ctg3604□ctg3783□WAG-56E11  
ctg244□ctg3604□ctg3783□WAG-56I10  
ctg244□ctg3943□ctg4219□WAG-39B23  
ctg244□ctg3943□ctg4219□WAG-79D18  
ctg244□ctg3943□ctg4219□WAG-114C8  
ctg244□ctg820□□WAG-26G17  
ctg244□ctg820□□WAG-100K18  
ctg244□ctg820□ctg4481□WAG-10O24  
ctg244□ctg820□ctg4481□WAG-99C10  
ctg244□ctg820□ctg896□WAG-40I10  
ctg244□ctg820□ctg896□WAG-90F11  
ctg244□ctg820□ctg896□WAG-115M23  
ctg244□ctg820□ctg896□WAG-122J7  
ctg244□ctg820□ctg896□WAG-126L15  
ctg2440□□□WAG-105N12  
ctg2440□ctg6033□□WAG-79H7  
ctg2440□ctg6033□□WAG-82C17  
ctg2440□ctg6033□□WAG-108O17  
ctg2441□□□WAG-65E10  
ctg2441□ctg5136□ctg5774□WAG-4M17  
ctg2441□ctg5136□ctg5774□WAG-4O15

ctg2442□ctg4419□ctg4584□WAG-24I8  
ctg2442□ctg4419□ctg4584□WAG-98O19  
ctg2443□□□WAG-95I6  
ctg2443□ctg4423□□WAG-20D14  
ctg2443□ctg4423□ctg6712□WAG-25O3  
ctg2443□ctg4423□ctg6712□WAG-90L3  
ctg2444□ctg4424□□WAG-33I9  
ctg2444□ctg4424□ctg6738□WAG-67D20  
ctg2444□ctg4424□ctg6738□WAG-85F15  
ctg2445□ctg4426□□WAG-12N15  
ctg2445□ctg4426□ctg6744□WAG-69A5  
ctg2445□ctg4426□ctg6744□WAG-77G18  
ctg2446□ctg4427□□WAG-11P24  
ctg2446□ctg4427□□WAG-65K9  
ctg2446□ctg4427□ctg6762□WAG-42H17  
ctg2446□ctg4427□ctg6762□WAG-72M1  
ctg2447□ctg4430□□WAG-59C6  
ctg2447□ctg4430□ctg6751□WAG-21L1  
ctg2447□ctg4430□ctg6751□WAG-64L9  
ctg2448□□□WAG-57H20  
ctg2448□ctg5228□ctg5994□WAG-84C15  
ctg2448□ctg5228□ctg5994□WAG-125O2  
ctg2449□ctg4432□ctg4590□WAG-21I1  
ctg2449□ctg4432□ctg4590□WAG-73H5  
ctg245□□□WAG-3H12  
ctg245□ctg1032□□WAG-19G4  
ctg245□ctg1032□□WAG-37O17  
ctg245□ctg1032□□WAG-56L21  
ctg245□ctg1032□□WAG-70J17  
ctg245□ctg1032□ctg1147□WAG-15B13  
ctg245□ctg1032□ctg1147□WAG-17A5  
ctg245□ctg1032□ctg1147□WAG-44E2  
ctg245□ctg1032□ctg1147□WAG-68A19  
ctg245□ctg1032□ctg1147□WAG-109B2  
ctg245□ctg1032□ctg1147□WAG-116F1  
ctg245□ctg1032□ctg1147□WAG-124K21  
ctg2450□□□WAG-25O10  
ctg2450□ctg5331□ctg6227□WAG-9B23  
ctg2450□ctg5331□ctg6227□WAG-56L19  
ctg2451□□□WAG-39C18  
ctg2451□ctg4867□□WAG-9P9  
ctg2451□ctg4867□□WAG-64K5  
ctg2451□ctg4867□□WAG-70P22  
ctg2452□□□WAG-21M19  
ctg2452□ctg4433□□WAG-29N15  
ctg2452□ctg4433□□WAG-38N12  
ctg2452□ctg4433□□WAG-124G10  
ctg2453□□□WAG-76G21  
ctg2453□□□WAG-101G16  
ctg2453□ctg4434□□WAG-19A3  
ctg2453□ctg4434□□WAG-56D18  
ctg2453□ctg4434□□WAG-111G2  
ctg2454□ctg4435□□WAG-28O8  
ctg2454□ctg4435□□WAG-63B6  
ctg2454□ctg4435□□WAG-97H17  
ctg2455□□□WAG-88E2



ctg2455□ctg5139□ctg5782□WAG-121I16  
ctg2455□ctg5139□ctg5782□WAG-127D12  
ctg2456□□□WAG-52D20  
ctg2456□ctg5105□ctg5700□WAG-14C22  
ctg2456□ctg5105□ctg5700□WAG-127E19  
ctg2457□□□WAG-7A14  
ctg2457□□□WAG-39B15  
ctg2457□□□WAG-117B12  
ctg2457□ctg5940□□WAG-93E1  
ctg2457□ctg5940□□WAG-111A9  
ctg2458□□□WAG-14E5  
ctg2458□□□WAG-84G22  
ctg2458□□□WAG-112J20  
ctg2458□□□WAG-114H15  
ctg2458□ctg5863□□WAG-57E22  
ctg2458□ctg5863□□WAG-59B20  
ctg2459□ctg4437□□WAG-45H20  
ctg2459□ctg4437□□WAG-52G11  
ctg2459□ctg4437□□WAG-71I19  
ctg246□ctg599□ctg4476□WAG-22B8  
ctg246□ctg599□ctg4476□WAG-51A19  
ctg246□ctg599□ctg659□WAG-15B6  
ctg246□ctg599□ctg659□WAG-15B14  
ctg246□ctg599□ctg659□WAG-17K10  
ctg246□ctg599□ctg659□WAG-50B5  
ctg246□ctg599□ctg659□WAG-120D2  
ctg2460□ctg4438□□WAG-29A14  
ctg2460□ctg4438□□WAG-50E6  
ctg2460□ctg4438□□WAG-68M17  
ctg2461□□□WAG-32M2  
ctg2461□□□WAG-129A3  
ctg2461□ctg5155□□WAG-89A5  
ctg2461□ctg5155□ctg5830□WAG-30K6  
ctg2461□ctg5155□ctg5830□WAG-71B4  
ctg2462□ctg4442□ctg4597□WAG-67G4  
ctg2462□ctg4442□ctg4597□WAG-106N21  
ctg2463□ctg4445□□WAG-69E11  
ctg2463□ctg4445□ctg6621□WAG-36C21  
ctg2463□ctg4445□ctg6621□WAG-95E21  
ctg2464□□□WAG-102C1  
ctg2464□ctg5332□ctg6229□WAG-34K13  
ctg2464□ctg5332□ctg6229□WAG-108P15  
ctg2465□□□WAG-128N23  
ctg2465□ctg5348□ctg6277□WAG-56A18  
ctg2465□ctg5348□ctg6277□WAG-113F4  
ctg2466□ctg4449□□WAG-19M16  
ctg2466□ctg4449□□WAG-33E22  
ctg2466□ctg4449□□WAG-57M10  
ctg2466□ctg4449□□WAG-102A19  
ctg2467□ctg4451□□WAG-15I4  
ctg2467□ctg4451□□WAG-53D20  
ctg2467□ctg4451□□WAG-57J9  
ctg2468□□□WAG-38I3  
ctg2468□ctg5175□□WAG-25H18  
ctg2468□ctg5175□□WAG-29D2  
ctg2468□ctg5175□□WAG-122P20

ctg2469□ctg4452□□WAG-37M7  
ctg2469□ctg4452□□WAG-100P13  
ctg2469□ctg4452□□WAG-127I12  
ctg247□□□WAG-62D2  
ctg247□ctg601□□WAG-75O7  
ctg247□ctg601□ctg632□WAG-20H10  
ctg247□ctg601□ctg632□WAG-33E21  
ctg247□ctg601□ctg632□WAG-39N18  
ctg247□ctg601□ctg632□WAG-63H13  
ctg247□ctg601□ctg632□WAG-78I13  
ctg247□ctg601□ctg632□WAG-92K9  
ctg247□ctg601□ctg632□WAG-126O5  
ctg2470□ctg4453□□WAG-8J9  
ctg2470□ctg4453□□WAG-66I22  
ctg2470□ctg4453□□WAG-125D7  
ctg2471□ctg4457□ctg4604□WAG-26D1  
ctg2471□ctg4457□ctg4604□WAG-104E24  
ctg2472□ctg4459□ctg4607□WAG-43P2  
ctg2472□ctg4459□ctg4607□WAG-57N23  
ctg2473□ctg4463□□WAG-84P5  
ctg2473□ctg4463□ctg6828□WAG-91C21  
ctg2473□ctg4463□ctg6828□WAG-95N6  
ctg2474□ctg4466□□WAG-13E20  
ctg2474□ctg4466□ctg6846□WAG-32I16  
ctg2474□ctg4466□ctg6846□WAG-60C4  
ctg2475□□□WAG-124M15  
ctg2475□ctg5381□ctg6343□WAG-22D1  
ctg2475□ctg5381□ctg6343□WAG-114N5  
ctg2476□□□WAG-2G11  
ctg2476□ctg5179□ctg5879□WAG-87P15  
ctg2476□ctg5179□ctg5879□WAG-129G16  
ctg2477□ctg5190□ctg5898□WAG-85D6  
ctg2477□ctg5190□ctg5898□WAG-101P1  
ctg2477□ctg5555□ctg6697□WAG-77G1  
ctg2477□ctg5555□ctg6697□WAG-80I15  
ctg2478□□□WAG-79N4  
ctg2478□ctg5197□ctg5914□WAG-74F22  
ctg2478□ctg5197□ctg5914□WAG-75F16  
ctg2479□□□WAG-14E19  
ctg2479□□□WAG-82G18  
ctg2479□ctg5201□ctg5919□WAG-27I15  
ctg2479□ctg5201□ctg5919□WAG-62B21  
ctg248□ctg6361□□WAG-28H2  
ctg248□ctg6361□□WAG-113N21  
ctg248□ctg760□ctg1448□WAG-80P3  
ctg248□ctg760□ctg1448□WAG-100D23  
ctg248□ctg760□ctg1448□WAG-117E23  
ctg248□ctg760□ctg1826□WAG-81F3  
ctg248□ctg760□ctg1826□WAG-90J15  
ctg248□ctg760□ctg1826□WAG-94J11  
ctg248□ctg760□ctg1826□WAG-99B22  
ctg248□ctg760□ctg2156□WAG-65B7  
ctg248□ctg760□ctg2156□WAG-83N21  
ctg248□ctg760□ctg2156□WAG-95F14  
ctg248□ctg760□ctg2156□WAG-101C1  
ctg248□ctg760□ctg2156□WAG-129O11

ctg2480□□□WAG-5C22  
ctg2480□□□WAG-43B15  
ctg2480□□□WAG-102N7  
ctg2480□□□WAG-105E23  
ctg2480□□□WAG-126L6  
ctg2481□□□WAG-9B5  
ctg2481□□□WAG-24B4  
ctg2481□□□WAG-99C3  
ctg2481□□□WAG-106K3  
ctg2481□ctg6233□□WAG-94C6  
ctg2481□ctg6233□□WAG-127F6  
ctg2482□□□WAG-101N12  
ctg2482□ctg4475□□WAG-52F12  
ctg2482□ctg4475□□WAG-120A15  
ctg2482□ctg4475□□WAG-129K17  
ctg2483□ctg4476□□WAG-15B4  
ctg2483□ctg4476□□WAG-79O20  
ctg2483□ctg4476□□WAG-113D16  
ctg2484□ctg4477□□WAG-4P4  
ctg2484□ctg4477□□WAG-29N9  
ctg2484□ctg4477□□WAG-111B8  
ctg2485□ctg4479□ctg4609□WAG-87G9  
ctg2485□ctg4479□ctg4609□WAG-130D8  
ctg2486□ctg4480□ctg4611□WAG-48B16  
ctg2486□ctg4480□ctg4611□WAG-118L11  
ctg2487□ctg4481□ctg4613□WAG-99B9  
ctg2487□ctg4481□ctg4613□WAG-116E20  
ctg2488□ctg4483□ctg4622□WAG-44F3  
ctg2488□ctg4483□ctg4622□WAG-46O24  
ctg2489□□□WAG-51G11  
ctg2489□ctg4486□□WAG-31A4  
ctg2489□ctg4486□ctg6757□WAG-32L5  
ctg2489□ctg4486□ctg6757□WAG-51K20  
ctg249□□□WAG-30O1  
ctg249□ctg2190□□WAG-6G23  
ctg249□ctg2190□□WAG-68B7  
ctg249□ctg2190□□WAG-72J7  
ctg249□ctg2190□□WAG-113B6  
ctg249□ctg2190□□WAG-122F5  
ctg249□ctg2190□ctg3385□WAG-15B12  
ctg249□ctg2190□ctg3385□WAG-33B8  
ctg249□ctg2190□ctg3385□WAG-87B17  
ctg249□ctg2190□ctg3385□WAG-116K21  
ctg249□ctg2190□ctg3385□WAG-123B1  
ctg249□ctg808□□WAG-60B9  
ctg249□ctg808□□WAG-60D9  
ctg249□ctg808□ctg663□WAG-7I6  
ctg249□ctg808□ctg663□WAG-11O14  
ctg249□ctg808□ctg663□WAG-59H5  
ctg249□ctg808□ctg663□WAG-61D16  
ctg249□ctg808□ctg663□WAG-80F12  
ctg249□ctg808□ctg663□WAG-80M4  
ctg249□ctg808□ctg663□WAG-127H20  
ctg2490□□□WAG-60J9  
ctg2490□ctg5919□□WAG-59C19  
ctg2490□ctg5919□□WAG-66P1

ctg2490□ctg6282□□WAG-64L13  
ctg2490□ctg6282□□WAG-114G7  
ctg2491□□□WAG-23B1  
ctg2491□ctg5156□ctg5831□WAG-45D14  
ctg2491□ctg5156□ctg5831□WAG-118E9  
ctg2492□□□WAG-6G14  
ctg2492□ctg5410□ctg6418□WAG-44N19  
ctg2492□ctg5410□ctg6418□WAG-97F3  
ctg2493□ctg4490□□WAG-2E3  
ctg2493□ctg4490□□WAG-21A2  
ctg2493□ctg4490□□WAG-99P24  
ctg2494□ctg4492□□WAG-24K6  
ctg2494□ctg4492□□WAG-63C11  
ctg2494□ctg4492□□WAG-81N20  
ctg2495□□□WAG-34D24  
ctg2495□ctg5219□ctg5972□WAG-60F1  
ctg2495□ctg5219□ctg5972□WAG-75C4  
ctg2496□□□WAG-10I15  
ctg2496□□□WAG-36B13  
ctg2496□□□WAG-87D3  
ctg2496□□□WAG-93K1  
ctg2496□□□WAG-118N16  
ctg2497□□□WAG-12G3  
ctg2497□□□WAG-75O6  
ctg2497□□□WAG-119L9  
ctg2497□ctg6081□□WAG-35O1  
ctg2497□ctg6081□□WAG-40D24  
ctg2498□□□WAG-1I10  
ctg2498□□□WAG-53H8  
ctg2498□□□WAG-66E13  
ctg2498□□□WAG-86N10  
ctg2499□□□WAG-40P22  
ctg2499□□□WAG-43O19  
ctg2499□□□WAG-89E22  
ctg2499□ctg5749□ctg6893□WAG-63L24  
ctg2499□ctg5749□ctg6893□WAG-111B4  
ctg25□□□WAG-13I24  
ctg25□□□WAG-102O9  
ctg25□ctg189□□WAG-28M6  
ctg25□ctg189□□WAG-31N1  
ctg25□ctg189□□WAG-62P10  
ctg25□ctg189□ctg1486□WAG-12E16  
ctg25□ctg189□ctg1486□WAG-60M22  
ctg25□ctg189□ctg1486□WAG-79D1  
ctg25□ctg189□ctg1486□WAG-99M21  
ctg25□ctg189□ctg1486□WAG-106B17  
ctg25□ctg189□ctg1486□WAG-106O7  
ctg25□ctg189□ctg251□WAG-19I18  
ctg25□ctg189□ctg251□WAG-23B21  
ctg25□ctg189□ctg251□WAG-42B2  
ctg25□ctg189□ctg251□WAG-50O6  
ctg25□ctg189□ctg251□WAG-77K19  
ctg25□ctg189□ctg251□WAG-93G7  
ctg25□ctg189□ctg251□WAG-100I18  
ctg25□ctg189□ctg251□WAG-118B22  
ctg25□ctg189□ctg313□WAG-11L12

ctg25□ctg189□ctg313□WAG-12O21  
ctg25□ctg189□ctg313□WAG-18M12  
ctg25□ctg189□ctg313□WAG-19D14  
ctg25□ctg189□ctg313□WAG-37E1  
ctg25□ctg189□ctg313□WAG-37J1  
ctg25□ctg189□ctg313□WAG-43M7  
ctg25□ctg189□ctg313□WAG-60K7  
ctg25□ctg189□ctg313□WAG-70N15  
ctg25□ctg189□ctg313□WAG-77J17  
ctg25□ctg189□ctg313□WAG-102H3  
ctg25□ctg189□ctg313□WAG-105C4  
ctg25□ctg189□ctg313□WAG-117I9  
ctg25□ctg189□ctg313□WAG-118F9  
ctg25□ctg189□ctg313□WAG-128J15  
ctg25□ctg2225□ctg2107□WAG-24O18  
ctg25□ctg2225□ctg2107□WAG-31M12  
ctg25□ctg2225□ctg2107□WAG-32O8  
ctg25□ctg2225□ctg2107□WAG-63F5  
ctg25□ctg2225□ctg2107□WAG-70O8  
ctg250□□□WAG-62E3  
ctg250□ctg611□□WAG-63F15  
ctg250□ctg611□ctg507□WAG-25L24  
ctg250□ctg611□ctg507□WAG-45N17  
ctg250□ctg611□ctg507□WAG-74I2  
ctg250□ctg611□ctg507□WAG-75K24  
ctg250□ctg611□ctg507□WAG-81B23  
ctg250□ctg611□ctg507□WAG-109B7  
ctg250□ctg611□ctg507□WAG-112C8  
ctg2500□ctg4494□□WAG-38B18  
ctg2500□ctg4494□□WAG-118C18  
ctg2500□ctg4494□□WAG-126G11  
ctg2501□ctg4496□ctg4625□WAG-101O1  
ctg2501□ctg4496□ctg4625□WAG-125N15  
ctg2502□ctg4498□ctg4629□WAG-100O22  
ctg2502□ctg4498□ctg4629□WAG-103L3  
ctg2503□ctg4504□□WAG-77F13  
ctg2503□ctg4504□ctg6897□WAG-70P12  
ctg2503□ctg4504□ctg6897□WAG-92B24  
ctg2504□ctg4505□□WAG-11N4  
ctg2504□ctg4505□ctg6899□WAG-10F6  
ctg2504□ctg4505□ctg6899□WAG-30D5  
ctg2505□ctg4506□ctg4638□WAG-1K2  
ctg2505□ctg4506□ctg4638□WAG-56K19  
ctg2505□ctg4506□ctg4638□WAG-112P13  
ctg2506□□□WAG-80P16  
ctg2506□□□WAG-95I21  
ctg2506□ctg5427□ctg6447□WAG-104O19  
ctg2506□ctg5427□ctg6447□WAG-118C13  
ctg2507□□□WAG-90A13  
ctg2507□ctg5430□ctg6453□WAG-93J14  
ctg2507□ctg5430□ctg6453□WAG-108L4  
ctg2508□□□WAG-9C20  
ctg2508□ctg5449□ctg6491□WAG-22O11  
ctg2508□ctg5449□ctg6491□WAG-55A13  
ctg2509□□□WAG-48A6  
ctg2509□□□WAG-55K24

ctg2509□ctg5255□ctg6055□WAG-31A10  
ctg2509□ctg5255□ctg6055□WAG-81N12  
ctg251□ctg2786□ctg2773□WAG-19O24  
ctg251□ctg2786□ctg2773□WAG-56M3  
ctg251□ctg2786□ctg2773□WAG-90N9  
ctg251□ctg612□ctg642□WAG-21A21  
ctg251□ctg612□ctg642□WAG-49P21  
ctg251□ctg612□ctg642□WAG-58G22  
ctg251□ctg612□ctg642□WAG-66G18  
ctg251□ctg612□ctg642□WAG-82H22  
ctg251□ctg612□ctg642□WAG-89A4  
ctg251□ctg612□ctg642□WAG-102O8  
ctg2510□ctg4510□□WAG-20K7  
ctg2510□ctg4510□□WAG-26H24  
ctg2510□ctg4510□□WAG-67F7  
ctg2511□ctg4512□□WAG-14M7  
ctg2511□ctg4512□□WAG-25J15  
ctg2511□ctg4512□□WAG-126G12  
ctg2512□□□WAG-62I3  
ctg2512□ctg5230□ctg5997□WAG-67E4  
ctg2512□ctg5230□ctg5997□WAG-118M9  
ctg2513□□□WAG-12B20  
ctg2513□ctg5214□ctg5963□WAG-59I23  
ctg2513□ctg5214□ctg5963□WAG-76E11  
ctg2514□□□WAG-116O6  
ctg2514□ctg5249□ctg6044□WAG-17B4  
ctg2514□ctg5249□ctg6044□WAG-127J17  
ctg2515□ctg4513□□WAG-57C10  
ctg2515□ctg4513□□WAG-65E8  
ctg2515□ctg4513□□WAG-78G21  
ctg2516□□□WAG-93G5  
ctg2516□ctg5462□□WAG-10B23  
ctg2516□ctg5462□□WAG-25A14  
ctg2517□ctg4514□ctg4640□WAG-116L10  
ctg2517□ctg4514□ctg4640□WAG-128M10  
ctg2518□ctg4518□ctg4650□WAG-54K17  
ctg2518□ctg4518□ctg4650□WAG-72B4  
ctg2519□ctg4522□ctg4655□WAG-30D9  
ctg2519□ctg4522□ctg4655□WAG-91A9  
ctg252□□□WAG-84I1  
ctg252□ctg1737□□WAG-42G11  
ctg252□ctg1737□ctg1944□WAG-40N1  
ctg252□ctg1737□ctg1944□WAG-91I12  
ctg252□ctg1737□ctg1944□WAG-122H2  
ctg252□ctg886□□WAG-32C4  
ctg252□ctg886□ctg1144□WAG-42C11  
ctg252□ctg886□ctg1144□WAG-51D20  
ctg252□ctg886□ctg1144□WAG-66B5  
ctg252□ctg886□ctg1144□WAG-76H5  
ctg252□ctg886□ctg1144□WAG-95K13  
ctg252□ctg886□ctg1144□WAG-111B5  
ctg252□ctg886□ctg3293□WAG-26K11  
ctg252□ctg886□ctg3293□WAG-30A13  
ctg252□ctg886□ctg3293□WAG-58M4  
ctg252□ctg886□ctg3293□WAG-98F12  
ctg2520□□□WAG-92D4

ctg2520□ctg5469□ctg6535□WAG-84A9  
ctg2520□ctg5469□ctg6535□WAG-111E21  
ctg2521□□□WAG-79G11  
ctg2521□□□WAG-100P10  
ctg2521□ctg5479□ctg6559□WAG-35G1  
ctg2521□ctg5479□ctg6559□WAG-62K15  
ctg2522□□□WAG-13E4  
ctg2522□ctg5485□ctg6573□WAG-46G15  
ctg2522□ctg5485□ctg6573□WAG-96B12  
ctg2523□ctg4529□□WAG-29F3  
ctg2523□ctg4529□□WAG-67A18  
ctg2523□ctg4529□□WAG-77D7  
ctg2524□ctg4532□□WAG-A19  
ctg2524□ctg4532□□WAG-4P6  
ctg2524□ctg4532□□WAG-30G11  
ctg2525□□□WAG-115B14  
ctg2525□ctg5158□ctg5835□WAG-94L19  
ctg2525□ctg5158□ctg5835□WAG-126D21  
ctg2526□□□WAG-70I3  
ctg2526□ctg5209□ctg5943□WAG-16H6  
ctg2526□ctg5209□ctg5943□WAG-86G24  
ctg2527□ctg4534□ctg4667□WAG-1K6  
ctg2527□ctg4534□ctg4667□WAG-116P22  
ctg2528□ctg4539□ctg4680□WAG-84F7  
ctg2528□ctg4539□ctg4680□WAG-88C10  
ctg2529□ctg4541□ctg4685□WAG-58D24  
ctg2529□ctg4541□ctg4685□WAG-73E17  
ctg253□□□WAG-116B1  
ctg253□ctg666□□WAG-48F19  
ctg253□ctg666□□WAG-99M18  
ctg253□ctg666□ctg712□WAG-32I9  
ctg253□ctg666□ctg712□WAG-46P5  
ctg253□ctg666□ctg712□WAG-71F10  
ctg253□ctg666□ctg712□WAG-81A7  
ctg253□ctg666□ctg712□WAG-96A16  
ctg253□ctg666□ctg712□WAG-96L15  
ctg253□ctg666□ctg712□WAG-109B17  
ctg2530□ctg4544□□WAG-22D6  
ctg2530□ctg4544□ctg6896□WAG-92N16  
ctg2530□ctg4544□ctg6896□WAG-95I24  
ctg2531□ctg4545□□WAG-23I22  
ctg2531□ctg4545□ctg6909□WAG-23E11  
ctg2531□ctg4545□ctg6909□WAG-26B23  
ctg2532□□□WAG-101L3  
ctg2532□ctg4546□□WAG-78N3  
ctg2532□ctg4546□ctg6592□WAG-90A6  
ctg2532□ctg4546□ctg6592□WAG-122O9  
ctg2533□□□WAG-83G11  
ctg2533□ctg5498□ctg6596□WAG-22H18  
ctg2533□ctg5498□ctg6596□WAG-119G12  
ctg2534□□□WAG-105L1  
ctg2534□ctg5505□ctg6612□WAG-23B22  
ctg2534□ctg5505□ctg6612□WAG-104D20  
ctg2535□□□WAG-59G12  
ctg2535□ctg5515□ctg6633□WAG-24A3  
ctg2535□ctg5515□ctg6633□WAG-72F16

ctg2536□□□WAG-13M13  
ctg2536□ctg5262□ctg6071□WAG-58N23  
ctg2536□ctg5262□ctg6071□WAG-83M14  
ctg2537□□□WAG-11M14  
ctg2537□□□WAG-28K14  
ctg2537□□□WAG-68O20  
ctg2537□□□WAG-96O1  
ctg2537□□□WAG-98I4  
ctg2538□ctg4566□ctg4714□WAG-74D10  
ctg2538□ctg4566□ctg4714□WAG-100C23  
ctg2539□ctg4569□ctg4722□WAG-42D18  
ctg2539□ctg4569□ctg4722□WAG-110M14  
ctg254□ctg1340□□WAG-24I10  
ctg254□ctg1340□ctg1636□WAG-49B9  
ctg254□ctg1340□ctg1636□WAG-70I8  
ctg254□ctg1340□ctg1636□WAG-109I15  
ctg254□ctg1340□ctg1636□WAG-125I24  
ctg254□ctg1340□ctg2511□WAG-84F3  
ctg254□ctg1340□ctg2511□WAG-99G17  
ctg254□ctg1340□ctg2511□WAG-110A19  
ctg254□ctg1340□ctg2511□WAG-122F21  
ctg254□ctg1340□ctg3059□WAG-6I13  
ctg254□ctg1340□ctg3059□WAG-6M11  
ctg254□ctg5769□□WAG-54P19  
ctg254□ctg5769□□WAG-121F4  
ctg2540□□□WAG-95N24  
ctg2540□ctg5542□ctg6674□WAG-56L24  
ctg2540□ctg5542□ctg6674□WAG-120A13  
ctg2541□□□WAG-121A18  
ctg2541□ctg5546□ctg6680□WAG-65E16  
ctg2541□ctg5546□ctg6680□WAG-107A1  
ctg2542□□□WAG-108A4  
ctg2542□ctg5564□ctg6715□WAG-10N1  
ctg2542□ctg5564□ctg6715□WAG-12I8  
ctg2543□□□WAG-23M11  
ctg2543□ctg4573□□WAG-64H24  
ctg2543□ctg4573□□WAG-117P4  
ctg2543□ctg4573□□WAG-121B6  
ctg2544□ctg4577□□WAG-29K10  
ctg2544□ctg4577□□WAG-47L19  
ctg2544□ctg4577□□WAG-78E2  
ctg2545□ctg4579□□WAG-30A20  
ctg2545□ctg4579□□WAG-49F10  
ctg2545□ctg4579□□WAG-106P15  
ctg2546□ctg4580□□WAG-24I13  
ctg2546□ctg4580□□WAG-50C11  
ctg2546□ctg4580□□WAG-60L8  
ctg2547□□□WAG-101N6  
ctg2547□ctg5318□ctg6196□WAG-44I2  
ctg2547□ctg5318□ctg6196□WAG-126N5  
ctg2548□□□WAG-43I10  
ctg2548□ctg5325□ctg6214□WAG-63H2  
ctg2548□ctg5325□ctg6214□WAG-69C4  
ctg2549□ctg4585□ctg4739□WAG-100A11  
ctg2549□ctg4585□ctg4739□WAG-108O13  
ctg255□□□WAG-58B7



ctg255□□□WAG-71J8  
ctg255□ctg1011□ctg1424□WAG-8A16  
ctg255□ctg1011□ctg1424□WAG-15J15  
ctg255□ctg1011□ctg1424□WAG-35P17  
ctg255□ctg1011□ctg1424□WAG-106G5  
ctg255□ctg1011□ctg1424□WAG-123G11  
ctg255□ctg1011□ctg1424□WAG-127B6  
ctg255□ctg1011□ctg5553□WAG-48F16  
ctg255□ctg1011□ctg5553□WAG-71B18  
ctg2550□ctg4590□ctg4755□WAG-51E23  
ctg2550□ctg4590□ctg4755□WAG-51J8  
ctg2551□□□WAG-123I16  
ctg2551□ctg5584□ctg6727□WAG-36J6  
ctg2551□ctg5584□ctg6727□WAG-120H20  
ctg2552□□□WAG-66G24  
ctg2552□ctg5528□ctg6659□WAG-32M9  
ctg2552□ctg5528□ctg6659□WAG-115L16  
ctg2553□□□WAG-105O24  
ctg2553□ctg5548□ctg6684□WAG-54K10  
ctg2553□ctg5548□ctg6684□WAG-93E13  
ctg2554□□□WAG-15J13  
ctg2554□ctg4592□□□WAG-68E9  
ctg2554□ctg4592□□□WAG-79E6  
ctg2554□ctg4592□□□WAG-92O22  
ctg2555□ctg4597□□□WAG-24L11  
ctg2555□ctg4597□□□WAG-36O6  
ctg2555□ctg4597□□□WAG-94P19  
ctg2555□ctg5512□ctg6629□WAG-2A17  
ctg2555□ctg5512□ctg6629□WAG-80L24  
ctg2556□ctg4602□□□WAG-27H23  
ctg2556□ctg4602□□□WAG-43L12  
ctg2556□ctg4602□□□WAG-67F4  
ctg2557□□□WAG-111K7  
ctg2557□ctg5292□ctg6131□WAG-65I6  
ctg2557□ctg5292□ctg6131□WAG-105C8  
ctg2558□□□WAG-22N7  
ctg2558□ctg5334□ctg6235□WAG-60N8  
ctg2558□ctg5334□ctg6235□WAG-82E9  
ctg2559□□□WAG-49B12  
ctg2559□ctg5612□□□WAG-48L5  
ctg2559□ctg5612□□□WAG-92O13  
ctg256□□□WAG-53N23  
ctg256□□□WAG-122B8  
ctg256□ctg1854□ctg2273□WAG-3G18  
ctg256□ctg1854□ctg2273□WAG-84G18  
ctg256□ctg1854□ctg2273□WAG-97J2  
ctg256□ctg1854□ctg2273□WAG-114L15  
ctg256□ctg1854□ctg4928□WAG-71O12  
ctg256□ctg1854□ctg4928□WAG-124H14  
ctg256□ctg872□ctg892□WAG-3C8  
ctg256□ctg872□ctg892□WAG-14L13  
ctg256□ctg872□ctg892□WAG-28F22  
ctg256□ctg872□ctg892□WAG-63C3  
ctg256□ctg872□ctg892□WAG-64C21  
ctg256□ctg872□ctg892□WAG-68E4  
ctg256□ctg872□ctg892□WAG-76O5

ctg256□ctg872□ctg892□WAG-95D6  
ctg2560□□□WAG-106O18  
ctg2560□ctg5614□□WAG-30M19  
ctg2560□ctg5614□□WAG-37I6  
ctg2561□□□WAG-21A12  
ctg2561□□□WAG-49C8  
ctg2561□ctg5337□ctg6246□WAG-49A17  
ctg2561□ctg5337□ctg6246□WAG-115H13  
ctg2562□□□WAG-9M4  
ctg2562□□□WAG-105I3  
ctg2562□ctg5339□ctg6256□WAG-96J7  
ctg2562□ctg5339□ctg6256□WAG-101A16  
ctg2563□□□WAG-5L23  
ctg2563□ctg5342□ctg6265□WAG-80J20  
ctg2563□ctg5342□ctg6265□WAG-88K23  
ctg2564□□□WAG-81H23  
ctg2564□ctg5344□ctg6269□WAG-76H1  
ctg2564□ctg5344□ctg6269□WAG-97E24  
ctg2565□□□WAG-34I17  
ctg2565□ctg5347□ctg6276□WAG-58C5  
ctg2565□ctg5347□ctg6276□WAG-86H13  
ctg2566□□□WAG-78L1  
ctg2566□ctg5349□ctg6280□WAG-51D14  
ctg2566□ctg5349□ctg6280□WAG-113O6  
ctg2566□ctg5912□□WAG-49G22  
ctg2566□ctg5912□□WAG-70J13  
ctg2567□□□WAG-94L18  
ctg2567□ctg5354□ctg6288□WAG-23I13  
ctg2567□ctg5354□ctg6288□WAG-43O16  
ctg2568□ctg4603□ctg4762□WAG-2N7  
ctg2568□ctg4603□ctg4762□WAG-126M10  
ctg2569□ctg4609□ctg4774□WAG-52F11  
ctg2569□ctg4609□ctg4774□WAG-87L15  
ctg257□□□WAG-18A12  
ctg257□□□WAG-41H11  
ctg257□□□WAG-119J4  
ctg257□ctg998□□WAG-99B15  
ctg257□ctg998□ctg1091□WAG-10N19  
ctg257□ctg998□ctg1091□WAG-40B23  
ctg257□ctg998□ctg1091□WAG-48M10  
ctg257□ctg998□ctg1091□WAG-85K3  
ctg257□ctg998□ctg1091□WAG-95G10  
ctg257□ctg998□ctg1091□WAG-106G12  
ctg257□ctg998□ctg1091□WAG-119P2  
ctg257□ctg998□ctg1091□WAG-121K14  
ctg257□ctg998□ctg1747□WAG-8C20  
ctg257□ctg998□ctg1747□WAG-49L24  
ctg257□ctg998□ctg1747□WAG-74E22  
ctg257□ctg998□ctg1747□WAG-97P16  
ctg257□ctg998□ctg1747□WAG-123K15  
ctg257□ctg998□ctg4372□WAG-91A22  
ctg257□ctg998□ctg4372□WAG-128D4  
ctg257□ctg998□ctg5173□WAG-31C9  
ctg257□ctg998□ctg5173□WAG-31O7  
ctg2570□□□WAG-48K23  
ctg2570□□□WAG-92H20

ctg2570□□□WAG-113O8  
ctg2570□□□WAG-121F22  
ctg2571□□□WAG-10H5  
ctg2571□□□WAG-19L23  
ctg2571□□□WAG-67N22  
ctg2571□□□WAG-71H13  
ctg2571□□□WAG-104D9  
ctg2571□□□WAG-117G20  
ctg2572□□□WAG-60H11  
ctg2572□□□WAG-126J6  
ctg2572□ctg5620□ctg6787□WAG-20I9  
ctg2572□ctg5620□ctg6787□WAG-109I8  
ctg2573□□□WAG-12G11  
ctg2573□ctg5535□ctg6670□WAG-4M15  
ctg2573□ctg5535□ctg6670□WAG-52H17  
ctg2574□ctg4616□□WAG-19A23  
ctg2574□ctg4616□□WAG-91N23  
ctg2574□ctg4616□□WAG-123O19  
ctg2575□ctg4618□□WAG-79G1  
ctg2575□ctg4618□ctg6920□WAG-71B23  
ctg2575□ctg4618□ctg6920□WAG-115L5  
ctg2576□ctg4623□□WAG-8P18  
ctg2576□ctg4623□□WAG-80J18  
ctg2576□ctg4623□□WAG-117G14  
ctg2577□ctg4625□ctg4789□WAG-113B11  
ctg2577□ctg4625□ctg4789□WAG-113B17  
ctg2578□ctg4629□ctg4796□WAG-29F20  
ctg2578□ctg4629□ctg4796□WAG-40D3  
ctg2579□ctg4630□ctg4797□WAG-15C11  
ctg2579□ctg4630□ctg4797□WAG-87J15  
ctg258□□□WAG-23C9  
ctg258□□□WAG-24B22  
ctg258□□□WAG-41E4  
ctg258□ctg744□ctg603□WAG-85E2  
ctg258□ctg744□ctg603□WAG-92E14  
ctg258□ctg744□ctg603□WAG-97O10  
ctg258□ctg744□ctg603□WAG-103E12  
ctg258□ctg744□ctg603□WAG-125I11  
ctg2580□□□WAG-35K1  
ctg2580□ctg5367□ctg6311□WAG-92I10  
ctg2580□ctg5367□ctg6311□WAG-119E14  
ctg2581□□□WAG-90J4  
ctg2581□ctg5661□ctg6832□WAG-84F17  
ctg2581□ctg5661□ctg6832□WAG-92M19  
ctg2582□ctg4638□□WAG-41B7  
ctg2582□ctg4638□□WAG-67D1  
ctg2582□ctg4638□□WAG-113N8  
ctg2583□□□WAG-49A18  
ctg2583□□□WAG-50I10  
ctg2583□□□WAG-77G9  
ctg2583□ctg4640□□WAG-58C24  
ctg2583□ctg4640□□WAG-109B16  
ctg2583□ctg4640□□WAG-130N18  
ctg2584□ctg4642□□WAG-35B11  
ctg2584□ctg4642□□WAG-51K22  
ctg2584□ctg4642□□WAG-101F22

ctg2585□ctg4644□□WAG-37L18  
ctg2585□ctg4644□□WAG-59A15  
ctg2585□ctg4644□□WAG-75H5  
ctg2586□ctg4646□□WAG-27G8  
ctg2586□ctg4646□□WAG-74K4  
ctg2586□ctg4646□□WAG-93G1  
ctg2587□□□WAG-54P14  
ctg2587□ctg5678□□WAG-88E12  
ctg2587□ctg5678□□WAG-122M3  
ctg2588□ctg5690□□WAG-7L16  
ctg2588□ctg5690□□WAG-87B4  
ctg2588□ctg6224□□WAG-68M11  
ctg2588□ctg6224□□WAG-113M11  
ctg2589□□□WAG-31J14  
ctg2589□□□WAG-31L4  
ctg2589□□□WAG-68P20  
ctg2589□ctg5693□□WAG-75K21  
ctg2589□ctg5693□□WAG-81M18  
ctg259□ctg5140□ctg5786□WAG-21D5  
ctg259□ctg5140□ctg5786□WAG-113C7  
ctg259□ctg906□ctg1038□WAG-17A3  
ctg259□ctg906□ctg1038□WAG-20N6  
ctg259□ctg906□ctg1038□WAG-36I22  
ctg259□ctg906□ctg1038□WAG-54E7  
ctg259□ctg906□ctg1038□WAG-54L7  
ctg259□ctg906□ctg1038□WAG-69O21  
ctg259□ctg906□ctg1038□WAG-122A1  
ctg259□ctg906□ctg5242□WAG-94I19  
ctg259□ctg906□ctg5242□WAG-124G13  
ctg2590□□□WAG-99K17  
ctg2590□ctg5411□ctg6420□WAG-42E13  
ctg2590□ctg5411□ctg6420□WAG-121P9  
ctg2591□□□WAG-65P6  
ctg2591□ctg5413□ctg6425□WAG-27F20  
ctg2591□ctg5413□ctg6425□WAG-119N4  
ctg2592□□□WAG-99L4  
ctg2592□ctg5416□ctg6432□WAG-16D16  
ctg2592□ctg5416□ctg6432□WAG-17B18  
ctg2593□□□WAG-66H17  
ctg2593□□□WAG-81C8  
ctg2593□□□WAG-85E15  
ctg2593□□□WAG-98C2  
ctg2593□□□WAG-120E24  
ctg2594□ctg5711□ctg6860□WAG-22N18  
ctg2594□ctg5711□ctg6860□WAG-102L10  
ctg2594□ctg6326□□WAG-11B9  
ctg2594□ctg6326□□WAG-74C15  
ctg2595□□□WAG-40G9  
ctg2595□□□WAG-41O23  
ctg2595□ctg5714□ctg6866□WAG-7J9  
ctg2595□ctg5714□ctg6866□WAG-47F12  
ctg2596□□□WAG-106P3  
ctg2596□ctg5716□ctg6869□WAG-1E14  
ctg2596□ctg5716□ctg6869□WAG-1O1  
ctg2597□ctg4650□□WAG-49P24  
ctg2597□ctg4650□□WAG-76G5

ctg2597□ctg4650□□WAG-80K23  
ctg2598□ctg4653□□WAG-24C17  
ctg2598□ctg4653□□WAG-79L14  
ctg2598□ctg4653□□WAG-105H6  
ctg2599□ctg4654□□WAG-61J23  
ctg2599□ctg4654□□WAG-102E23  
ctg2599□ctg4654□□WAG-122O17  
ctg26□□□WAG-13E16  
ctg26□□□WAG-34I5  
ctg26□□□WAG-58L20  
ctg26□ctg141□□WAG-21D24  
ctg26□ctg141□□WAG-29C15  
ctg26□ctg141□□WAG-48E14  
ctg26□ctg141□□WAG-101P2  
ctg26□ctg141□□WAG-127A21  
ctg26□ctg141□ctg254□WAG-26C20  
ctg26□ctg141□ctg254□WAG-33J17  
ctg26□ctg141□ctg254□WAG-55K15  
ctg26□ctg141□ctg254□WAG-69L6  
ctg26□ctg141□ctg254□WAG-87P10  
ctg26□ctg141□ctg254□WAG-88G11  
ctg26□ctg141□ctg254□WAG-91A14  
ctg26□ctg141□ctg254□WAG-95D8  
ctg26□ctg141□ctg254□WAG-113I24  
ctg26□ctg141□ctg254□WAG-116M4  
ctg26□ctg141□ctg254□WAG-117F21  
ctg26□ctg141□ctg2861□WAG-64A17  
ctg26□ctg141□ctg2861□WAG-68C4  
ctg26□ctg141□ctg2861□WAG-113A13  
ctg26□ctg141□ctg2861□WAG-124D5  
ctg26□ctg141□ctg4223□WAG-18L17  
ctg26□ctg141□ctg4223□WAG-19J6  
ctg26□ctg141□ctg4223□WAG-114E16  
ctg26□ctg141□ctg5402□WAG-43G14  
ctg26□ctg141□ctg5402□WAG-71A12  
ctg26□ctg141□ctg6463□WAG-29J13  
ctg26□ctg141□ctg6463□WAG-91H9  
ctg26□ctg5266□ctg6082□WAG-32K4  
ctg26□ctg5266□ctg6082□WAG-49D15  
ctg26□ctg6311□□WAG-8O17  
ctg26□ctg6311□□WAG-51N5  
ctg260□ctg866□□WAG-16M19  
ctg260□ctg866□□WAG-35D10  
ctg260□ctg866□ctg1214□WAG-23G17  
ctg260□ctg866□ctg1214□WAG-33P12  
ctg260□ctg866□ctg1214□WAG-44H8  
ctg260□ctg866□ctg1214□WAG-50L7  
ctg260□ctg866□ctg1214□WAG-60O6  
ctg260□ctg866□ctg1214□WAG-63K13  
ctg260□ctg866□ctg1214□WAG-65K3  
ctg260□ctg866□ctg6905□WAG-13M21  
ctg260□ctg866□ctg6905□WAG-96N21  
ctg2600□□□WAG-20P24  
ctg2600□ctg4655□□WAG-16F16  
ctg2600□ctg4655□□WAG-22A5  
ctg2600□ctg4655□□WAG-108C19

ctg2601□□□WAG-14N23  
ctg2601□ctg5420□ctg6437□WAG-36M19  
ctg2601□ctg5420□ctg6437□WAG-42N9  
ctg2602□□□WAG-57J10  
ctg2602□□□WAG-72K10  
ctg2602□□□WAG-96G9  
ctg2602□ctg5733□□WAG-63D23  
ctg2602□ctg5733□□WAG-63G17  
ctg2603□□□WAG-2C17  
ctg2603□ctg4657□□WAG-103C23  
ctg2603□ctg4657□ctg6890□WAG-4H10  
ctg2603□ctg4657□ctg6890□WAG-18M1  
ctg2604□□□WAG-43D4  
ctg2604□ctg5386□ctg6353□WAG-101N2  
ctg2604□ctg5386□ctg6353□WAG-127I7  
ctg2605□□□WAG-122I17  
ctg2605□ctg5437□ctg6473□WAG-79C19  
ctg2605□ctg5437□ctg6473□WAG-85A20  
ctg2606□□□WAG-72G6  
ctg2606□ctg5447□ctg6488□WAG-54L13  
ctg2606□ctg5447□ctg6488□WAG-64D17  
ctg2607□□□WAG-28A19  
ctg2607□□□WAG-83D13  
ctg2607□ctg5448□ctg6490□WAG-60N23  
ctg2607□ctg5448□ctg6490□WAG-86J11  
ctg2608□□□WAG-86G4  
ctg2608□ctg5452□ctg6502□WAG-28L3  
ctg2608□ctg5452□ctg6502□WAG-47H19  
ctg2609□□□WAG-96I3  
ctg2609□ctg5350□ctg6281□WAG-41K18  
ctg2609□ctg5350□ctg6281□WAG-49E19  
ctg261□□□WAG-18G2  
ctg261□□□WAG-36H14  
ctg261□□□WAG-78E1  
ctg261□□□WAG-97N1  
ctg261□ctg1402□□WAG-6K12  
ctg261□ctg1402□□WAG-51M12  
ctg261□ctg1402□ctg1606□WAG-23G21  
ctg261□ctg1402□ctg1606□WAG-26I3  
ctg261□ctg1402□ctg1606□WAG-40G15  
ctg261□ctg1402□ctg1606□WAG-73G21  
ctg261□ctg1402□ctg1606□WAG-116F22  
ctg261□ctg1402□ctg1606□WAG-128H5  
ctg261□ctg1402□ctg2761□WAG-12H12  
ctg261□ctg1402□ctg2761□WAG-30B22  
ctg261□ctg1402□ctg2761□WAG-62C6  
ctg261□ctg1402□ctg2761□WAG-70A21  
ctg261□ctg1402□ctg2761□WAG-76I17  
ctg261□ctg1402□ctg2761□WAG-77E13  
ctg261□ctg1692□ctg1835□WAG-16C8  
ctg261□ctg1692□ctg1835□WAG-40J16  
ctg261□ctg1692□ctg1835□WAG-44A6  
ctg261□ctg1692□ctg1835□WAG-125D22  
ctg261□ctg1692□ctg3350□WAG-18O21  
ctg261□ctg1692□ctg3350□WAG-35G18  
ctg261□ctg1692□ctg3350□WAG-53M15

ctg261□ctg1692□ctg3350□WAG-62C7  
ctg261□ctg1692□ctg3350□WAG-75D19  
ctg261□ctg1692□ctg6844□WAG-7C14  
ctg261□ctg1692□ctg6844□WAG-43K23  
ctg261□ctg5264□ctg6077□WAG-38H7  
ctg261□ctg5264□ctg6077□WAG-59G3  
ctg2610□ctg4660□ctg4820□WAG-20M16  
ctg2610□ctg4660□ctg4820□WAG-80J1  
ctg2611□□□WAG-83H20  
ctg2611□□□WAG-114N11  
ctg2611□ctg5657□ctg6822□WAG-101N9  
ctg2611□ctg5657□ctg6822□WAG-121F6  
ctg2612□□□WAG-101P23  
ctg2612□ctg5457□ctg6513□WAG-25I8  
ctg2612□ctg5457□ctg6513□WAG-42M2  
ctg2613□ctg4663□□WAG-87A8  
ctg2613□ctg4663□□WAG-93E5  
ctg2613□ctg4663□□WAG-103D2  
ctg2614□ctg4664□□WAG-50B3  
ctg2614□ctg4664□□WAG-71F20  
ctg2614□ctg4664□□WAG-84B8  
ctg2615□□□WAG-83G8  
ctg2615□ctg4666□□WAG-57H1  
ctg2615□ctg4666□□WAG-68D13  
ctg2615□ctg4666□□WAG-71H16  
ctg2616□□□WAG-116I16  
ctg2616□ctg5724□ctg6876□WAG-80E20  
ctg2616□ctg5724□ctg6876□WAG-83H6  
ctg2617□□□WAG-20N15  
ctg2617□ctg5782□□WAG-4A1  
ctg2617□ctg5782□□WAG-76K17  
ctg2618□□□WAG-4M2  
ctg2618□ctg5366□ctg6310□WAG-92P4  
ctg2618□ctg5366□ctg6310□WAG-93G3  
ctg2619□□□WAG-84D5  
ctg2619□ctg5476□ctg6553□WAG-54N1  
ctg2619□ctg5476□ctg6553□WAG-75M1  
ctg2619□ctg6524□□WAG-11L15  
ctg2619□ctg6524□□WAG-82M17  
ctg262□□□WAG-31K1  
ctg262□□□WAG-45A1  
ctg262□ctg767□□WAG-1J15  
ctg262□ctg767□□WAG-24O8  
ctg262□ctg767□□WAG-55O5  
ctg262□ctg767□□WAG-75E19  
ctg262□ctg767□ctg1551□WAG-20D15  
ctg262□ctg767□ctg1551□WAG-44N20  
ctg262□ctg767□ctg1551□WAG-54E6  
ctg262□ctg767□ctg1551□WAG-73P1  
ctg262□ctg767□ctg1551□WAG-120D13  
ctg262□ctg767□ctg1551□WAG-120F4  
ctg262□ctg767□ctg620□WAG-4B18  
ctg262□ctg767□ctg620□WAG-20H9  
ctg262□ctg767□ctg620□WAG-40F21  
ctg262□ctg767□ctg620□WAG-65D11  
ctg262□ctg767□ctg620□WAG-73P11

ctg262□ctg767□ctg620□WAG-81C22  
ctg262□ctg767□ctg620□WAG-88P14  
ctg262□ctg767□ctg620□WAG-128K18  
ctg2620□ctg4667□ctg4826□WAG-56L18  
ctg2620□ctg4667□ctg4826□WAG-71G10  
ctg2621□ctg4671□ctg4837□WAG-22P11  
ctg2621□ctg4671□ctg4837□WAG-71P9  
ctg2622□ctg4672□ctg4845□WAG-21A7  
ctg2622□ctg4672□ctg4845□WAG-121N13  
ctg2623□ctg4673□ctg4846□WAG-20B22  
ctg2623□ctg4673□ctg4846□WAG-41M15  
ctg2624□□□WAG-87C17  
ctg2624□ctg5783□ctg6904□WAG-91E3  
ctg2624□ctg5783□ctg6904□WAG-98L14  
ctg2625□ctg4675□□WAG-25L20  
ctg2625□ctg4675□□WAG-81G21  
ctg2625□ctg4675□□WAG-97I9  
ctg2626□ctg4678□□WAG-1P16  
ctg2626□ctg4678□□WAG-36I10  
ctg2626□ctg4678□□WAG-125F3  
ctg2627□□□WAG-62J10  
ctg2627□□□WAG-82A24  
ctg2627□ctg5763□□WAG-76P15  
ctg2627□ctg5763□□WAG-101L4  
ctg2628□□□WAG-1N20  
ctg2628□ctg5821□□WAG-44E11  
ctg2628□ctg5821□□WAG-106H11  
ctg2629□□□WAG-37A11  
ctg2629□□□WAG-115A24  
ctg2629□ctg5822□□WAG-39K7  
ctg2629□ctg5822□□WAG-39K9  
ctg263□ctg5786□□WAG-82G11  
ctg263□ctg5786□□WAG-130H3  
ctg263□ctg773□□WAG-10F5  
ctg263□ctg773□□WAG-128L6  
ctg263□ctg773□ctg784□WAG-20I4  
ctg263□ctg773□ctg784□WAG-60B8  
ctg263□ctg773□ctg784□WAG-67O24  
ctg263□ctg773□ctg784□WAG-69P5  
ctg263□ctg773□ctg784□WAG-80F15  
ctg263□ctg773□ctg784□WAG-116N2  
ctg2630□□□WAG-62N7  
ctg2630□ctg5497□ctg6595□WAG-32E6  
ctg2630□ctg5497□ctg6595□WAG-119H13  
ctg2631□□□WAG-41O20  
ctg2631□□□WAG-87F24  
ctg2631□ctg5499□ctg6601□WAG-84O6  
ctg2631□ctg5499□ctg6601□WAG-110O10  
ctg2632□□□WAG-87J20  
ctg2632□ctg5514□ctg6632□WAG-72J5  
ctg2632□ctg5514□ctg6632□WAG-101N3  
ctg2633□□□WAG-87L3  
ctg2633□ctg5491□ctg6583□WAG-19P2  
ctg2633□ctg5491□ctg6583□WAG-35D7  
ctg2634□ctg4681□ctg4849□WAG-28H7  
ctg2634□ctg4681□ctg4849□WAG-78H17



ctg2635□ctg4682□ctg4850□WAG-46B9  
ctg2635□ctg4682□ctg4850□WAG-129I24  
ctg2636□ctg4683□ctg4851□WAG-113O19  
ctg2636□ctg4683□ctg4851□WAG-118N4  
ctg2637□□□WAG-61O14  
ctg2637□ctg5538□□WAG-71B5  
ctg2637□ctg5538□□WAG-100O19  
ctg2638□ctg4691□□WAG-5F7  
ctg2638□ctg4691□□WAG-12M3  
ctg2638□ctg4691□□WAG-87P9  
ctg2639□ctg4692□□WAG-28I7  
ctg2639□ctg4692□□WAG-55N17  
ctg2639□ctg4692□□WAG-87D10  
ctg264□□□WAG-65A15  
ctg264□□□WAG-116I7  
ctg264□ctg3881□ctg4149□WAG-18N23  
ctg264□ctg3881□ctg4149□WAG-72N19  
ctg264□ctg3881□ctg4149□WAG-81O14  
ctg264□ctg644□□WAG-6K15  
ctg264□ctg644□□WAG-29K24  
ctg264□ctg644□□WAG-103G3  
ctg264□ctg644□□WAG-125I18  
ctg264□ctg644□ctg1514□WAG-6D19  
ctg264□ctg644□ctg1514□WAG-35N3  
ctg264□ctg644□ctg1514□WAG-43E2  
ctg264□ctg644□ctg1514□WAG-116B11  
ctg264□ctg644□ctg1514□WAG-123P9  
ctg264□ctg644□ctg5817□WAG-33C6  
ctg264□ctg644□ctg5817□WAG-70L24  
ctg2640□ctg4694□□WAG-39M7  
ctg2640□ctg4694□□WAG-39M9  
ctg2640□ctg4694□□WAG-73C4  
ctg2641□ctg4696□□WAG-45L4  
ctg2641□ctg4696□ctg6967□WAG-10D15  
ctg2641□ctg4696□ctg6967□WAG-127H22  
ctg2642□□□WAG-81B17  
ctg2642□ctg5445□ctg6486□WAG-58P22  
ctg2642□ctg5445□ctg6486□WAG-65M9  
ctg2643□ctg4699□ctg4871□WAG-78N15  
ctg2643□ctg4699□ctg4871□WAG-93H14  
ctg2644□ctg4704□□WAG-49B3  
ctg2644□ctg4704□ctg4883□WAG-25F1  
ctg2644□ctg4704□ctg4883□WAG-129C2  
ctg2645□□□WAG-117F18  
ctg2645□ctg5569□□WAG-94D21  
ctg2645□ctg5569□□WAG-129K18  
ctg2646□ctg5578□□WAG-29G10  
ctg2646□ctg5578□□WAG-55M17  
ctg2646□ctg5954□□WAG-57J2  
ctg2646□ctg5954□□WAG-127O18  
ctg2647□ctg4709□□WAG-17K24  
ctg2647□ctg4709□□WAG-47H9  
ctg2647□ctg4709□□WAG-98G22  
ctg2648□□□WAG-1D13  
ctg2648□□□WAG-61J20  
ctg2648□ctg4776□□WAG-43F24

ctg2648□ctg4776□□WAG-61N21  
ctg2648□ctg4776□□WAG-70M4  
ctg2649□□□WAG-106M6  
ctg2649□ctg5892□□WAG-117E3  
ctg2649□ctg5892□□WAG-121K7  
ctg265□ctg2859□ctg3657□WAG-20L4  
ctg265□ctg2859□ctg3657□WAG-84P7  
ctg265□ctg2859□ctg3657□WAG-118A9  
ctg265□ctg2859□ctg3698□WAG-17O24  
ctg265□ctg2859□ctg3698□WAG-56C5  
ctg265□ctg2859□ctg3698□WAG-58E22  
ctg265□ctg919□□WAG-20M18  
ctg265□ctg919□□WAG-56E21  
ctg265□ctg919□ctg974□WAG-41O14  
ctg265□ctg919□ctg974□WAG-42O14  
ctg265□ctg919□ctg974□WAG-105I14  
ctg265□ctg919□ctg974□WAG-105J14  
ctg265□ctg919□ctg974□WAG-118A22  
ctg265□ctg919□ctg974□WAG-122E15  
ctg2650□□□WAG-27F10  
ctg2650□□□WAG-47E17  
ctg2650□ctg5900□□WAG-26H15  
ctg2650□ctg5900□□WAG-92P7  
ctg2651□□□WAG-127N16  
ctg2651□ctg5874□□WAG-33C15  
ctg2651□ctg5874□□WAG-57F8  
ctg2652□□□WAG-29L3  
ctg2652□ctg5928□□WAG-26L2  
ctg2652□ctg5928□□WAG-78B15  
ctg2653□□□WAG-7F2  
ctg2653□□□WAG-30E6  
ctg2653□□□WAG-70N4  
ctg2653□ctg5591□ctg6750□WAG-67O20  
ctg2653□ctg5591□ctg6750□WAG-92E17  
ctg2654□ctg5524□ctg6653□WAG-21J4  
ctg2654□ctg5524□ctg6653□WAG-42C20  
ctg2654□ctg6257□□WAG-41N11  
ctg2654□ctg6257□□WAG-112P15  
ctg2655□ctg4713□ctg4890□WAG-106P22  
ctg2655□ctg4713□ctg4890□WAG-109C7  
ctg2656□ctg4715□ctg4893□WAG-34C20  
ctg2656□ctg4715□ctg4893□WAG-103L5  
ctg2657□ctg4717□ctg4901□WAG-65I9  
ctg2657□ctg4717□ctg4901□WAG-102B19  
ctg2658□ctg4724□□WAG-6N15  
ctg2658□ctg4724□□WAG-65N14  
ctg2658□ctg4724□□WAG-66E7  
ctg2659□□□WAG-10H9  
ctg2659□ctg5939□□WAG-18D15  
ctg2659□ctg5939□□WAG-103A22  
ctg266□□□WAG-K5  
ctg266□ctg1568□□WAG-67H22  
ctg266□ctg1568□□WAG-102P24  
ctg266□ctg1568□ctg1792□WAG-44K9  
ctg266□ctg1568□ctg1792□WAG-64N17  
ctg266□ctg1568□ctg1792□WAG-98A8

ctg266□ctg1568□ctg1792□WAG-101B2  
ctg266□ctg1568□ctg1792□WAG-104M12  
ctg266□ctg1568□ctg1792□WAG-105N7  
ctg266□ctg1568□ctg1792□WAG-122F15  
ctg266□ctg1568□ctg1792□WAG-123C16  
ctg2660□□□WAG-19M6  
ctg2660□ctg5988□□WAG-32G10  
ctg2660□ctg5988□□WAG-60B3  
ctg2661□□□WAG-33K17  
ctg2661□ctg5617□ctg6781□WAG-54M24  
ctg2661□ctg5617□ctg6781□WAG-118E20  
ctg2662□□□WAG-12J5  
ctg2662□ctg5621□ctg6788□WAG-63A24  
ctg2662□ctg5621□ctg6788□WAG-106L19  
ctg2663□ctg5451□ctg6494□WAG-51P5  
ctg2663□ctg5451□ctg6494□WAG-80B9  
ctg2663□ctg5980□□WAG-13I7  
ctg2663□ctg5980□□WAG-56M18  
ctg2664□□□WAG-25I19  
ctg2664□ctg5627□ctg6802□WAG-46F10  
ctg2664□ctg5627□ctg6802□WAG-52E20  
ctg2665□ctg5529□ctg6660□WAG-30N20  
ctg2665□ctg5529□ctg6660□WAG-32G3  
ctg2665□ctg5648□□WAG-60H3  
ctg2665□ctg5648□□WAG-124K14  
ctg2666□ctg5309□ctg6175□WAG-13L23  
ctg2666□ctg5309□ctg6175□WAG-46L6  
ctg2666□ctg6473□□WAG-37F13  
ctg2666□ctg6473□□WAG-60K5  
ctg2667□ctg4729□ctg4921□WAG-67M18  
ctg2667□ctg4729□ctg4921□WAG-99C15  
ctg2668□ctg4730□ctg4922□WAG-14E11  
ctg2668□ctg4730□ctg4922□WAG-92A17  
ctg2669□ctg4732□ctg4927□WAG-58H21  
ctg2669□ctg4732□ctg4927□WAG-76M7  
ctg267□□□WAG-6G2  
ctg267□□□WAG-11P8  
ctg267□ctg4872□ctg5167□WAG-42F14  
ctg267□ctg4872□ctg5167□WAG-44I17  
ctg267□ctg654□ctg677□WAG-17E15  
ctg267□ctg654□ctg677□WAG-18D21  
ctg267□ctg654□ctg677□WAG-44A5  
ctg267□ctg654□ctg677□WAG-58E3  
ctg267□ctg654□ctg677□WAG-99K5  
ctg267□ctg654□ctg677□WAG-113P15  
ctg267□ctg654□ctg677□WAG-116J12  
ctg267□ctg654□ctg677□WAG-125D17  
ctg2670□ctg4733□ctg4929□WAG-67G9  
ctg2670□ctg4733□ctg4929□WAG-98F18  
ctg2671□ctg4734□ctg4932□WAG-51I1  
ctg2671□ctg4734□ctg4932□WAG-67L2  
ctg2672□ctg4736□ctg4934□WAG-47A13  
ctg2672□ctg4736□ctg4934□WAG-54P12  
ctg2673□ctg4741□ctg4944□WAG-10O22  
ctg2673□ctg4741□ctg4944□WAG-40G18  
ctg2674□ctg4742□ctg4945□WAG-9P5

ctg2674□ctg4742□ctg4945□WAG-65G5  
ctg2675□□□WAG-16D13  
ctg2675□□□WAG-130F19  
ctg2675□ctg5639□ctg6811□WAG-68K3  
ctg2675□ctg5639□ctg6811□WAG-100D11  
ctg2676□□□WAG-81B24  
ctg2676□ctg5652□□WAG-11P19  
ctg2676□ctg5652□□WAG-39K11  
ctg2677□□□WAG-97K3  
ctg2677□ctg5653□□WAG-11E16  
ctg2677□ctg5653□□WAG-105L18  
ctg2678□ctg4744□□WAG-50N11  
ctg2678□ctg4744□□WAG-84E6  
ctg2678□ctg4744□□WAG-91E17  
ctg2679□ctg4745□□WAG-45J23  
ctg2679□ctg4745□□WAG-81A18  
ctg2679□ctg4745□□WAG-116C18  
ctg268□ctg1762□ctg2147□WAG-10P16  
ctg268□ctg1762□ctg2147□WAG-41H15  
ctg268□ctg1762□ctg2147□WAG-47A17  
ctg268□ctg1762□ctg2147□WAG-67C3  
ctg268□ctg1762□ctg2147□WAG-122D11  
ctg268□ctg2979□□WAG-48E16  
ctg268□ctg2979□□WAG-98B5  
ctg268□ctg2979□ctg3705□WAG-53J24  
ctg268□ctg2979□ctg3705□WAG-81M5  
ctg268□ctg2979□ctg3705□WAG-90P24  
ctg268□ctg2979□ctg3705□WAG-105H7  
ctg268□ctg3742□ctg3974□WAG-20G17  
ctg268□ctg3742□ctg3974□WAG-31E3  
ctg268□ctg3742□ctg3974□WAG-33G13  
ctg268□ctg5643□□WAG-72L13  
ctg268□ctg5643□□WAG-128P19  
ctg268□ctg6567□□WAG-91A5  
ctg268□ctg6567□□WAG-92K22  
ctg2680□ctg4746□□WAG-47J16  
ctg2680□ctg4746□□WAG-69I2  
ctg2680□ctg4746□□WAG-88M19  
ctg2681□ctg4747□□WAG-15L23  
ctg2681□ctg4747□□WAG-20E1  
ctg2681□ctg4747□□WAG-67O18  
ctg2682□ctg4748□□WAG-21P20  
ctg2682□ctg4748□□WAG-35B7  
ctg2682□ctg4748□□WAG-51A14  
ctg2682□ctg4748□□WAG-127F1  
ctg2683□□□WAG-96C24  
ctg2683□ctg5857□ctg6930□WAG-43H2  
ctg2683□ctg5857□ctg6930□WAG-74I8  
ctg2684□□□WAG-19H2  
ctg2684□□□WAG-24O12  
ctg2684□□□WAG-28M8  
ctg2684□□□WAG-113E1  
ctg2684□ctg5662□ctg6834□WAG-9K5  
ctg2684□ctg5662□ctg6834□WAG-82J24  
ctg2685□ctg5618□ctg6782□WAG-57O5  
ctg2685□ctg5618□ctg6782□WAG-116K18

ctg2685□ctg6358□□WAG-44L17  
ctg2685□ctg6358□□WAG-51L20  
ctg2686□ctg5585□ctg6732□WAG-16L17  
ctg2686□ctg5585□ctg6732□WAG-105N2  
ctg2686□ctg5985□□WAG-40K6  
ctg2686□ctg5985□□WAG-40L9  
ctg2687□ctg4750□ctg4951□WAG-70O23  
ctg2687□ctg4750□ctg4951□WAG-125P4  
ctg2688□ctg4751□□WAG-102E6  
ctg2688□ctg4751□ctg4952□WAG-119H7  
ctg2688□ctg4751□ctg4952□WAG-125J24  
ctg2689□ctg4752□ctg4954□WAG-54E23  
ctg2689□ctg4752□ctg4954□WAG-118M7  
ctg269□□□WAG-10F20  
ctg269□□□WAG-59M7  
ctg269□ctg783□□WAG-9A8  
ctg269□ctg783□ctg636□WAG-19G17  
ctg269□ctg783□ctg636□WAG-37I11  
ctg269□ctg783□ctg636□WAG-44L22  
ctg269□ctg783□ctg636□WAG-85N4  
ctg269□ctg783□ctg636□WAG-115D11  
ctg2690□ctg4756□ctg4961□WAG-84J2  
ctg2690□ctg4756□ctg4961□WAG-96N12  
ctg2691□ctg4757□ctg4965□WAG-90I12  
ctg2691□ctg4757□ctg4965□WAG-122F1  
ctg2692□ctg4758□ctg4966□WAG-53E15  
ctg2692□ctg4758□ctg4966□WAG-89O1  
ctg2693□ctg4759□ctg4967□WAG-86L1  
ctg2693□ctg4759□ctg4967□WAG-89P7  
ctg2694□ctg4768□ctg4980□WAG-29C21  
ctg2694□ctg4768□ctg4980□WAG-42I4  
ctg2695□ctg4770□ctg4983□WAG-24H14  
ctg2695□ctg4770□ctg4983□WAG-36D19  
ctg2696□□□WAG-16N15  
ctg2696□ctg5702□□WAG-36I20  
ctg2696□ctg5702□□WAG-127N10  
ctg2697□□□WAG-1E24  
ctg2697□ctg4771□□WAG-66E17  
ctg2697□ctg4771□□WAG-117N16  
ctg2697□ctg4771□□WAG-125C7  
ctg2697□ctg6241□□WAG-35B17  
ctg2697□ctg6241□□WAG-67A19  
ctg2698□□□WAG-8G13  
ctg2698□ctg4772□□WAG-17N12  
ctg2698□ctg4772□□WAG-94M10  
ctg2698□ctg4772□□WAG-107C3  
ctg2699□ctg4773□□WAG-85E20  
ctg2699□ctg4773□□WAG-86J20  
ctg2699□ctg4773□□WAG-106I23  
ctg27□□□WAG-59I14  
ctg27□ctg126□ctg177□WAG-40H16  
ctg27□ctg126□ctg177□WAG-44A21  
ctg27□ctg126□ctg177□WAG-49D23  
ctg27□ctg126□ctg177□WAG-60I14  
ctg27□ctg126□ctg177□WAG-67D5  
ctg27□ctg126□ctg177□WAG-94B8

ctg27□ctg126□ctg177□WAG-100K19  
ctg27□ctg126□ctg177□WAG-105G21  
ctg27□ctg126□ctg177□WAG-111K19  
ctg27□ctg126□ctg3289□WAG-8K7  
ctg27□ctg126□ctg3289□WAG-40D7  
ctg27□ctg126□ctg3289□WAG-63H22  
ctg27□ctg126□ctg3289□WAG-65D16  
ctg270□ctg5379□ctg6339□WAG-34H12  
ctg270□ctg5379□ctg6339□WAG-102O5  
ctg270□ctg788□ctg2504□WAG-9C16  
ctg270□ctg788□ctg2504□WAG-20A19  
ctg270□ctg788□ctg2504□WAG-112K5  
ctg270□ctg788□ctg2504□WAG-117H1  
ctg270□ctg788□ctg2504□WAG-118B4  
ctg270□ctg788□ctg798□WAG-22O13  
ctg270□ctg788□ctg798□WAG-25B24  
ctg270□ctg788□ctg798□WAG-26M17  
ctg270□ctg788□ctg798□WAG-36H12  
ctg270□ctg788□ctg798□WAG-37J14  
ctg270□ctg788□ctg798□WAG-48E10  
ctg270□ctg788□ctg798□WAG-121F23  
ctg2700□□□WAG-112F24  
ctg2700□ctg6048□□WAG-22N11  
ctg2700□ctg6048□□WAG-94K20  
ctg2701□□□WAG-6H19  
ctg2701□□□WAG-88D6  
ctg2701□ctg6051□□WAG-7B23  
ctg2701□ctg6051□□WAG-74B15  
ctg2702□□□WAG-29A15  
ctg2702□□□WAG-79C23  
ctg2702□ctg5738□□WAG-45G7  
ctg2702□ctg5738□□WAG-86B5  
ctg2703□□□WAG-87P2  
ctg2703□ctg6074□□WAG-75E18  
ctg2703□ctg6074□□WAG-107N5  
ctg2704□□□WAG-23A11  
ctg2704□□□WAG-81F22  
ctg2704□ctg5993□□WAG-19M14  
ctg2704□ctg5993□□WAG-36P19  
ctg2705□ctg4777□□WAG-11A4  
ctg2705□ctg4777□ctg6955□WAG-30K23  
ctg2705□ctg4777□ctg6955□WAG-61F24  
ctg2706□□□WAG-95A22  
ctg2706□ctg6030□□WAG-6L19  
ctg2706□ctg6030□□WAG-87N11  
ctg2707□ctg4778□ctg4988□WAG-21P22  
ctg2707□ctg4778□ctg4988□WAG-129G4  
ctg2708□ctg4779□ctg4989□WAG-18L22  
ctg2708□ctg4779□ctg4989□WAG-123L18  
ctg2709□ctg4781□ctg4993□WAG-105J13  
ctg2709□ctg4781□ctg4993□WAG-108N1  
ctg271□ctg5465□ctg6527□WAG-25H1  
ctg271□ctg5465□ctg6527□WAG-129L17  
ctg271□ctg804□□WAG-43M8  
ctg271□ctg804□□WAG-53K24  
ctg271□ctg804□□WAG-121M3

ctg271□ctg804□ctg824□WAG-7N18  
ctg271□ctg804□ctg824□WAG-46H17  
ctg271□ctg804□ctg824□WAG-56F22  
ctg271□ctg804□ctg824□WAG-71O9  
ctg271□ctg804□ctg824□WAG-119F3  
ctg2710□ctg4784□ctg5000□WAG-86D12  
ctg2710□ctg4784□ctg5000□WAG-86P22  
ctg2711□ctg4785□ctg5002□WAG-15J8  
ctg2711□ctg4785□ctg5002□WAG-81C5  
ctg2712□ctg4786□ctg5010□WAG-62O18  
ctg2712□ctg4786□ctg5010□WAG-67H17  
ctg2713□ctg4788□ctg5014□WAG-25G3  
ctg2713□ctg4788□ctg5014□WAG-49E13  
ctg2714□ctg4789□ctg5016□WAG-37K21  
ctg2714□ctg4789□ctg5016□WAG-44H1  
ctg2715□□□WAG-58L14  
ctg2715□ctg5718□□WAG-54A24  
ctg2715□ctg5718□□WAG-129A16  
ctg2716□ctg4791□□WAG-20G13  
ctg2716□ctg4791□□WAG-61G15  
ctg2716□ctg4791□□WAG-94G13  
ctg2717□□□WAG-1D11  
ctg2717□ctg6091□□WAG-35I16  
ctg2717□ctg6091□□WAG-72F11  
ctg2718□□□WAG-23D21  
ctg2718□ctg6095□□WAG-51N2  
ctg2718□ctg6095□□WAG-71I15  
ctg2719□□□WAG-14P20  
ctg2719□ctg6099□□WAG-40K5  
ctg2719□ctg6099□□WAG-66J24  
ctg272□ctg1247□□WAG-31J11  
ctg272□ctg1247□ctg1083□WAG-11L13  
ctg272□ctg1247□ctg1083□WAG-12J9  
ctg272□ctg1247□ctg1083□WAG-25C12  
ctg272□ctg1247□ctg1083□WAG-52E5  
ctg272□ctg1247□ctg1083□WAG-55F18  
ctg272□ctg1247□ctg1083□WAG-55I5  
ctg272□ctg1247□ctg1083□WAG-126C20  
ctg272□ctg3882□ctg4150□WAG-14O3  
ctg272□ctg3882□ctg4150□WAG-72J4  
ctg272□ctg3882□ctg4150□WAG-114N17  
ctg272□ctg6320□□WAG-22J4  
ctg272□ctg6320□□WAG-73B17  
ctg2720□□□WAG-58C4  
ctg2720□ctg5810□□WAG-69A19  
ctg2720□ctg5810□□WAG-105D14  
ctg2721□□□WAG-65G20  
ctg2721□□□WAG-79O15  
ctg2721□ctg5983□□WAG-45F11  
ctg2721□ctg5983□□WAG-68I15  
ctg2722□□□WAG-57M6  
ctg2722□ctg5712□ctg6861□WAG-90I5  
ctg2722□ctg5712□ctg6861□WAG-95C3  
ctg2723□ctg4795□ctg5036□WAG-9G15  
ctg2723□ctg4795□ctg5036□WAG-65D5  
ctg2724□ctg4796□ctg5037□WAG-62N21

ctg2724□ctg4796□ctg5037□WAG-86G20  
ctg2725□□□WAG-50B15  
ctg2725□□□WAG-72L24  
ctg2725□ctg5766□□WAG-22M17  
ctg2725□ctg5766□□WAG-72O14  
ctg2726□□□WAG-1A21  
ctg2726□ctg5781□□WAG-8M5  
ctg2726□ctg5781□□WAG-75A17  
ctg2727□□□WAG-51F23  
ctg2727□ctg6122□□WAG-38J23  
ctg2727□ctg6122□□WAG-120C11  
ctg2728□ctg4806□□WAG-41K22  
ctg2728□ctg4806□□WAG-69F18  
ctg2728□ctg4806□□WAG-119J12  
ctg2729□□□WAG-123M3  
ctg2729□ctg6168□□WAG-28B8  
ctg2729□ctg6168□□WAG-73L19  
ctg273□ctg5958□□WAG-2G4  
ctg273□ctg5958□□WAG-122K4  
ctg273□ctg672□□WAG-13F7  
ctg273□ctg672□□WAG-80I6  
ctg273□ctg672□□WAG-95C21  
ctg273□ctg672□ctg1280□WAG-14N12  
ctg273□ctg672□ctg1280□WAG-55C17  
ctg273□ctg672□ctg1280□WAG-67G11  
ctg273□ctg672□ctg1280□WAG-121J5  
ctg273□ctg672□ctg1280□WAG-123G10  
ctg273□ctg672□ctg1280□WAG-128C18  
ctg273□ctg672□ctg2866□WAG-14E6  
ctg273□ctg672□ctg2866□WAG-58C8  
ctg273□ctg672□ctg2866□WAG-64B16  
ctg273□ctg672□ctg2866□WAG-72L12  
ctg273□ctg672□ctg2866□WAG-126G17  
ctg273□ctg672□ctg2866□WAG-126I13  
ctg2730□ctg4810□ctg5060□WAG-1J7  
ctg2730□ctg4810□ctg5060□WAG-83G13  
ctg2731□ctg4812□ctg5066□WAG-24B9  
ctg2731□ctg4812□ctg5066□WAG-59E19  
ctg2732□□□WAG-10N21  
ctg2732□ctg5806□□WAG-16D9  
ctg2732□ctg5806□□WAG-80F5  
ctg2733□□□WAG-32D1  
ctg2733□ctg5812□□WAG-2A11  
ctg2733□ctg5812□□WAG-67E6  
ctg2734□□□WAG-82F20  
ctg2734□ctg5826□□WAG-23L20  
ctg2734□ctg5826□□WAG-106A10  
ctg2735□ctg4818□ctg5084□WAG-16A11  
ctg2735□ctg4818□ctg5084□WAG-109P11  
ctg2736□ctg4819□ctg5085□WAG-91P14  
ctg2736□ctg4819□ctg5085□WAG-93I14  
ctg2737□□□WAG-60M16  
ctg2737□ctg6181□□WAG-83P16  
ctg2737□ctg6181□□WAG-87O2  
ctg2738□□□WAG-32M21  
ctg2738□□□WAG-43B16



ctg2738□ctg6182□□WAG-19H15  
ctg2738□ctg6182□□WAG-83H15  
ctg2739□□□WAG-36I2  
ctg2739□ctg6186□□WAG-73H10  
ctg2739□ctg6186□□WAG-74A18  
ctg274□□□WAG-58P18  
ctg274□□□WAG-60H12  
ctg274□□□WAG-98C21  
ctg274□ctg5927□□WAG-27L17  
ctg274□ctg5927□□WAG-29M4  
ctg274□ctg939□□WAG-18P7  
ctg274□ctg939□□WAG-81B2  
ctg274□ctg939□ctg2447□WAG-29D21  
ctg274□ctg939□ctg2447□WAG-56I4  
ctg274□ctg939□ctg2447□WAG-82M9  
ctg274□ctg939□ctg2447□WAG-86O6  
ctg274□ctg939□ctg2447□WAG-113K13  
ctg274□ctg939□ctg2447□WAG-119D1  
ctg2740□□□WAG-57D23  
ctg2740□ctg5924□□WAG-39P14  
ctg2740□ctg5924□□WAG-107J16  
ctg2741□ctg4825□ctg5097□WAG-25N18  
ctg2741□ctg4825□ctg5097□WAG-62L12  
ctg2742□ctg4827□ctg5101□WAG-18A15  
ctg2742□ctg4827□ctg5101□WAG-48P20  
ctg2743□□□WAG-52O21  
ctg2743□ctg5848□□WAG-31K2  
ctg2743□ctg5848□□WAG-96J23  
ctg2744□□□WAG-96K16  
ctg2744□ctg5851□□WAG-93P15  
ctg2744□ctg5851□□WAG-98D3  
ctg2745□□□WAG-12H21  
ctg2745□ctg5819□□WAG-53K7  
ctg2745□ctg5819□□WAG-69G9  
ctg2746□□□WAG-55I2  
ctg2746□□□WAG-92E21  
ctg2746□ctg5721□□WAG-40B2  
ctg2746□ctg5721□□WAG-98E19  
ctg2747□□□WAG-76C6  
ctg2747□ctg5875□□WAG-33A2  
ctg2747□ctg5875□□WAG-105P17  
ctg2748□ctg4832□□WAG-12J17  
ctg2748□ctg4832□□WAG-103A1  
ctg2748□ctg4832□□WAG-127K18  
ctg2749□ctg4837□□WAG-68M9  
ctg2749□ctg4837□□WAG-71G23  
ctg2749□ctg4837□□WAG-78K17  
ctg275□ctg925□□WAG-35I15  
ctg275□ctg925□□WAG-112J2  
ctg275□ctg925□ctg1283□WAG-74E19  
ctg275□ctg925□ctg1283□WAG-85C20  
ctg275□ctg925□ctg1283□WAG-103F14  
ctg275□ctg925□ctg1283□WAG-109E16  
ctg275□ctg942□ctg791□WAG-3D3  
ctg275□ctg942□ctg791□WAG-25E21  
ctg275□ctg942□ctg791□WAG-74D23

ctg275□ctg942□ctg791□WAG-105F19  
ctg275□ctg942□ctg791□WAG-106L3  
ctg275□ctg942□ctg791□WAG-122M21  
ctg275□ctg942□ctg791□WAG-126G14  
ctg275□ctg942□ctg791□WAG-126N14  
ctg2750□□□WAG-34N19  
ctg2750□ctg6258□□WAG-41L17  
ctg2750□ctg6258□□WAG-42K10  
ctg2751□□□WAG-59F3  
ctg2751□□□WAG-121F14  
ctg2751□ctg6270□□WAG-1P22  
ctg2751□ctg6270□□WAG-106H5  
ctg2752□□□WAG-81E16  
ctg2752□ctg5955□□WAG-7D11  
ctg2752□ctg5955□□WAG-126L12  
ctg2753□ctg4839□ctg5111□WAG-42H1  
ctg2753□ctg4839□ctg5111□WAG-106N10  
ctg2754□ctg4840□ctg5113□WAG-28N3  
ctg2754□ctg4840□ctg5113□WAG-100K3  
ctg2755□ctg4841□ctg5114□WAG-53H19  
ctg2755□ctg4841□ctg5114□WAG-99E19  
ctg2756□ctg4843□ctg5117□WAG-8G5  
ctg2756□ctg4843□ctg5117□WAG-75I17  
ctg2757□ctg4844□ctg5120□WAG-50F16  
ctg2757□ctg4844□ctg5120□WAG-125P22  
ctg2758□□□WAG-72I4  
ctg2758□ctg5889□□WAG-80J23  
ctg2758□ctg5889□□WAG-127J7  
ctg2759□ctg5832□□WAG-3B17  
ctg2759□ctg5832□□WAG-8K10  
ctg2759□ctg5895□□WAG-7H24  
ctg2759□ctg5895□□WAG-106F5  
ctg276□□□WAG-71O13  
ctg276□□□WAG-106E3  
ctg276□□□WAG-107C4  
ctg276□□□WAG-109J22  
ctg276□□□WAG-115H10  
ctg276□ctg4601□□WAG-45J16  
ctg276□ctg4601□□WAG-116H17  
ctg276□ctg4601□□WAG-127F11  
ctg276□ctg825□ctg675□WAG-22M4  
ctg276□ctg825□ctg675□WAG-48O17  
ctg276□ctg825□ctg675□WAG-56E2  
ctg276□ctg825□ctg675□WAG-79L22  
ctg276□ctg825□ctg675□WAG-102I13  
ctg276□ctg825□ctg675□WAG-112D4  
ctg276□ctg825□ctg675□WAG-129J8  
ctg276□ctg825□ctg675□WAG-130B1  
ctg2760□□□WAG-5M7  
ctg2760□ctg5855□□WAG-78F8  
ctg2760□ctg5855□□WAG-79N6  
ctg2761□ctg4846□□WAG-M14  
ctg2761□ctg4846□ctg6921□WAG-72C24  
ctg2761□ctg4846□ctg6921□WAG-108G12  
ctg2762□□□WAG-84O21  
ctg2762□□□WAG-86J15

ctg2762□ctg5915□□WAG-66E23  
ctg2762□ctg5915□□WAG-77J3  
ctg2763□□□WAG-126L5  
ctg2763□ctg5926□□WAG-37B17  
ctg2763□ctg5926□□WAG-54N16  
ctg2764□ctg4849□ctg5127□WAG-73C2  
ctg2764□ctg4849□ctg5127□WAG-128D10  
ctg2765□ctg4852□ctg5130□WAG-8F20  
ctg2765□ctg4852□ctg5130□WAG-107O6  
ctg2766□ctg4853□ctg5132□WAG-68M13  
ctg2766□ctg4853□ctg5132□WAG-98J11  
ctg2767□ctg4856□ctg5140□WAG-24D6  
ctg2767□ctg4856□ctg5140□WAG-118J23  
ctg2768□□□WAG-14I9  
ctg2768□ctg6284□□WAG-63D11  
ctg2768□ctg6284□□WAG-109E14  
ctg2769□□□WAG-43F15  
ctg2769□□□WAG-63M3  
ctg2769□ctg6285□□WAG-23I5  
ctg2769□ctg6285□□WAG-108K17  
ctg277□□□WAG-40B15  
ctg277□□□WAG-90J18  
ctg277□ctg1878□□WAG-101L14  
ctg277□ctg1878□ctg2293□WAG-1I6  
ctg277□ctg1878□ctg2293□WAG-23N15  
ctg277□ctg1878□ctg2293□WAG-32E20  
ctg277□ctg1878□ctg2293□WAG-55O1  
ctg277□ctg1878□ctg2293□WAG-104L23  
ctg277□ctg1878□ctg2293□WAG-108E15  
ctg277□ctg1878□ctg2293□WAG-111N24  
ctg277□ctg1878□ctg4825□WAG-49G15  
ctg277□ctg1878□ctg4825□WAG-76C18  
ctg277□ctg826□ctg873□WAG-13H16  
ctg277□ctg826□ctg873□WAG-40H23  
ctg277□ctg826□ctg873□WAG-41C1  
ctg277□ctg826□ctg873□WAG-52O20  
ctg277□ctg826□ctg873□WAG-65I21  
ctg277□ctg826□ctg873□WAG-76B1  
ctg277□ctg826□ctg873□WAG-84L7  
ctg2770□ctg4858□□WAG-1I4  
ctg2770□ctg4858□□WAG-17A24  
ctg2770□ctg4858□□WAG-76K5  
ctg2771□ctg4863□ctg5150□WAG-22G5  
ctg2771□ctg4863□ctg5150□WAG-24A5  
ctg2772□ctg4864□ctg5152□WAG-5E13  
ctg2772□ctg4864□ctg5152□WAG-19A8  
ctg2773□□□WAG-104E11  
ctg2773□ctg5890□□WAG-125C11  
ctg2773□ctg5890□□WAG-129D3  
ctg2774□□□WAG-35D8  
ctg2774□□□WAG-84P3  
ctg2774□ctg5960□□WAG-6O8  
ctg2774□ctg5960□□WAG-119H5  
ctg2775□□□WAG-13O21  
ctg2775□ctg5961□□WAG-65N5  
ctg2775□ctg5961□□WAG-112B4

ctg2776□□□WAG-78A7  
ctg2776□ctg5977□□WAG-63D15  
ctg2776□ctg5977□□WAG-114M11  
ctg2777□□□WAG-20J2  
ctg2777□ctg5856□□WAG-55G12  
ctg2777□ctg5856□□WAG-76A21  
ctg2778□□□WAG-24B7  
ctg2778□ctg5930□□WAG-22G21  
ctg2778□ctg5930□□WAG-51F16  
ctg2779□□□WAG-6P11  
ctg2779□ctg5994□□WAG-17L14  
ctg2779□ctg5994□□WAG-100I14  
ctg278□□□WAG-90G10  
ctg278□ctg680□□WAG-35E23  
ctg278□ctg680□ctg794□WAG-36G5  
ctg278□ctg680□ctg794□WAG-52I15  
ctg278□ctg680□ctg794□WAG-67A5  
ctg278□ctg680□ctg794□WAG-76L19  
ctg278□ctg680□ctg794□WAG-90M15  
ctg278□ctg680□ctg794□WAG-91D10  
ctg278□ctg680□ctg794□WAG-101F14  
ctg278□ctg680□ctg794□WAG-123D1  
ctg278□ctg680□ctg794□WAG-128C16  
ctg2780□□□WAG-19P17  
ctg2780□ctg5841□□WAG-13I22  
ctg2780□ctg5841□□WAG-126E9  
ctg2781□ctg4865□□WAG-89B2  
ctg2781□ctg4865□□WAG-117O23  
ctg2781□ctg4865□□WAG-122P11  
ctg2782□ctg4874□ctg5172□WAG-18O22  
ctg2782□ctg4874□ctg5172□WAG-32O15  
ctg2783□□□WAG-5E1  
ctg2783□ctg6332□□WAG-82H2  
ctg2783□ctg6332□□WAG-127O3  
ctg2784□□□WAG-3B13  
ctg2784□□□WAG-98O22  
ctg2784□ctg6338□□WAG-66G4  
ctg2784□ctg6338□□WAG-100P8  
ctg2785□□□WAG-33C11  
ctg2785□□□WAG-51O2  
ctg2785□□□WAG-125J8  
ctg2785□ctg6353□□WAG-56P18  
ctg2785□ctg6353□□WAG-110P11  
ctg2786□□□WAG-4E23  
ctg2786□□□WAG-42O16  
ctg2786□ctg6355□□WAG-29G18  
ctg2786□ctg6355□□WAG-56L8  
ctg2787□ctg4876□ctg5176□WAG-52J13  
ctg2787□ctg4876□ctg5176□WAG-83C9  
ctg2788□ctg4877□ctg5177□WAG-52L20  
ctg2788□ctg4877□ctg5177□WAG-69C22  
ctg2789□□□WAG-124B4  
ctg2789□ctg5999□□WAG-31L11  
ctg2789□ctg5999□□WAG-87K6  
ctg279□□□WAG-55C24  
ctg279□ctg797□ctg3056□WAG-42O10

ctg279□ctg797□ctg3056□WAG-49K19  
ctg279□ctg797□ctg3056□WAG-77H7  
ctg279□ctg797□ctg657□WAG-9H16  
ctg279□ctg797□ctg657□WAG-65L10  
ctg279□ctg797□ctg657□WAG-93H1  
ctg279□ctg797□ctg657□WAG-106I1  
ctg279□ctg797□ctg657□WAG-118J15  
ctg2790□□□WAG-58P9  
ctg2790□ctg6014□□WAG-10E23  
ctg2790□ctg6014□□WAG-44O24  
ctg2791□□□WAG-98O9  
ctg2791□ctg6028□□WAG-63B15  
ctg2791□ctg6028□□WAG-95M18  
ctg2792□□□WAG-2F19  
ctg2792□ctg6031□□WAG-4D18  
ctg2792□ctg6031□□WAG-83A24  
ctg2793□ctg4879□ctg5182□WAG-18B14  
ctg2793□ctg4879□ctg5182□WAG-104O13  
ctg2794□ctg4883□ctg5197□WAG-12F11  
ctg2794□ctg4883□ctg5197□WAG-31D12  
ctg2795□□□WAG-54D21  
ctg2795□ctg6369□□WAG-124C15  
ctg2795□ctg6369□□WAG-124H6  
ctg2796□□□WAG-75M16  
ctg2796□ctg6384□□WAG-96G5  
ctg2796□ctg6384□□WAG-101P11  
ctg2797□□□WAG-94M14  
ctg2797□ctg6414□□WAG-14G7  
ctg2797□ctg6414□□WAG-17J17  
ctg2798□ctg6056□□WAG-41G24  
ctg2798□ctg6056□□WAG-56J20  
ctg2798□ctg6056□□WAG-87J2  
ctg2799□ctg5936□□WAG-119C7  
ctg2799□ctg5936□□WAG-127O12  
ctg2799□ctg6064□□WAG-3I12  
ctg2799□ctg6064□□WAG-125D4  
ctg28□□□WAG-29E10  
ctg28□□□WAG-55I23  
ctg28□ctg123□□WAG-15M6  
ctg28□ctg123□□WAG-122C4  
ctg28□ctg123□ctg171□WAG-28B16  
ctg28□ctg123□ctg171□WAG-36A18  
ctg28□ctg123□ctg171□WAG-80F24  
ctg28□ctg123□ctg171□WAG-87H14  
ctg28□ctg123□ctg171□WAG-88N21  
ctg28□ctg123□ctg171□WAG-93I18  
ctg28□ctg123□ctg171□WAG-107M9  
ctg28□ctg123□ctg171□WAG-120F14  
ctg28□ctg123□ctg171□WAG-122E24  
ctg28□ctg123□ctg171□WAG-128D20  
ctg28□ctg123□ctg2588□WAG-11J1  
ctg28□ctg123□ctg2588□WAG-43J10  
ctg28□ctg123□ctg2588□WAG-84N1  
ctg28□ctg123□ctg2588□WAG-111M15  
ctg28□ctg1309□ctg1478□WAG-45A9  
ctg28□ctg1309□ctg1478□WAG-73D4

ctg28□ctg1309□ctg1478□WAG-74L7  
ctg28□ctg1309□ctg1478□WAG-93N8  
ctg28□ctg1309□ctg1478□WAG-118C8  
ctg28□ctg1877□ctg2308□WAG-7A11  
ctg28□ctg1877□ctg2308□WAG-12B16  
ctg28□ctg1877□ctg2308□WAG-33B2  
ctg28□ctg1877□ctg2308□WAG-47B6  
ctg28□ctg1877□ctg2308□WAG-113D1  
ctg28□ctg1896□□WAG-22L17  
ctg28□ctg1896□□WAG-24N9  
ctg28□ctg1896□□WAG-114F7  
ctg28□ctg1896□ctg2249□WAG-17M18  
ctg28□ctg1896□ctg2249□WAG-19N10  
ctg28□ctg1896□ctg2249□WAG-66J7  
ctg28□ctg1896□ctg2249□WAG-103L15  
ctg28□ctg1896□ctg5204□WAG-78P6  
ctg28□ctg1896□ctg5204□WAG-96G3  
ctg280□□□WAG-42O17  
ctg280□ctg687□□WAG-11P17  
ctg280□ctg687□ctg5075□WAG-38M23  
ctg280□ctg687□ctg5075□WAG-39H12  
ctg280□ctg687□ctg557□WAG-30F2  
ctg280□ctg687□ctg557□WAG-42L24  
ctg280□ctg687□ctg557□WAG-43N14  
ctg280□ctg687□ctg557□WAG-78H12  
ctg280□ctg687□ctg557□WAG-94L9  
ctg280□ctg687□ctg557□WAG-100H10  
ctg280□ctg687□ctg557□WAG-100L7  
ctg2800□□□WAG-36L15  
ctg2800□ctg5991□□WAG-25J9  
ctg2800□ctg5991□□WAG-34H5  
ctg2801□□□WAG-1H17  
ctg2801□ctg5982□□WAG-23L9  
ctg2801□ctg5982□□WAG-48N1  
ctg2802□ctg4885□ctg5206□WAG-91I23  
ctg2802□ctg4885□ctg5206□WAG-129E8  
ctg2803□ctg4886□ctg5207□WAG-90E6  
ctg2803□ctg4886□ctg5207□WAG-128N9  
ctg2804□ctg4894□ctg5218□WAG-22D4  
ctg2804□ctg4894□ctg5218□WAG-74D8  
ctg2805□ctg4895□ctg5219□WAG-11N15  
ctg2805□ctg4895□ctg5219□WAG-68B13  
ctg2806□ctg4899□ctg5224□WAG-45E9  
ctg2806□ctg4899□ctg5224□WAG-100B12  
ctg2807□ctg4901□ctg5229□WAG-29M20  
ctg2807□ctg4901□ctg5229□WAG-105F16  
ctg2808□ctg4903□□WAG-3F15  
ctg2808□ctg4903□□WAG-36O13  
ctg2808□ctg4903□□WAG-117H6  
ctg2809□□□WAG-52G22  
ctg2809□ctg6380□□WAG-72J16  
ctg2809□ctg6380□□WAG-109G21  
ctg281□□□WAG-115P19  
ctg281□ctg1249□□WAG-21J19  
ctg281□ctg1249□□WAG-92F5  
ctg281□ctg1249□ctg1461□WAG-17I20

ctg281□ctg1249□ctg1461□WAG-39B12  
ctg281□ctg1249□ctg1461□WAG-57L22  
ctg281□ctg1249□ctg1461□WAG-59H16  
ctg281□ctg1249□ctg1461□WAG-61B8  
ctg281□ctg1249□ctg1461□WAG-78D6  
ctg281□ctg1249□ctg1461□WAG-90C21  
ctg281□ctg1249□ctg1461□WAG-127E24  
ctg281□ctg1249□ctg1461□WAG-127O2  
ctg2810□ctg6062□□WAG-10K1  
ctg2810□ctg6062□□WAG-17G21  
ctg2810□ctg6520□□WAG-46L15  
ctg2810□ctg6520□□WAG-58D13  
ctg2811□ctg4904□ctg5234□WAG-118H8  
ctg2811□ctg4904□ctg5234□WAG-118L23  
ctg2812□ctg4905□□WAG-91P15  
ctg2812□ctg4905□□WAG-112P12  
ctg2812□ctg4905□□WAG-121P1  
ctg2813□ctg4907□ctg5236□WAG-31L19  
ctg2813□ctg4907□ctg5236□WAG-107J11  
ctg2814□ctg4908□ctg5238□WAG-102A12  
ctg2814□ctg4908□ctg5238□WAG-105P19  
ctg2815□ctg4909□ctg5239□WAG-102I20  
ctg2815□ctg4909□ctg5239□WAG-115A23  
ctg2816□ctg4910□ctg5241□WAG-84F2  
ctg2816□ctg4910□ctg5241□WAG-97G12  
ctg2817□ctg4912□ctg5247□WAG-78N5  
ctg2817□ctg4912□ctg5247□WAG-125C23  
ctg2818□ctg4916□ctg5254□WAG-23A20  
ctg2818□ctg4916□ctg5254□WAG-52B2  
ctg2819□ctg4923□ctg5265□WAG-10D22  
ctg2819□ctg4923□ctg5265□WAG-69I17  
ctg282□□□WAG-85G10  
ctg282□ctg1130□□WAG-31A5  
ctg282□ctg1130□□WAG-43H7  
ctg282□ctg1130□□WAG-62J23  
ctg282□ctg1130□ctg2562□WAG-28N21  
ctg282□ctg1130□ctg2562□WAG-40H13  
ctg282□ctg1130□ctg2562□WAG-59I12  
ctg282□ctg1130□ctg2562□WAG-74A22  
ctg282□ctg1130□ctg2562□WAG-96P7  
ctg282□ctg1130□ctg2562□WAG-108L15  
ctg282□ctg1130□ctg2562□WAG-108L17  
ctg282□ctg1130□ctg2562□WAG-109L23  
ctg282□ctg1130□ctg2562□WAG-111O13  
ctg2820□□□WAG-48F7  
ctg2820□ctg6461□□WAG-81E2  
ctg2820□ctg6461□□WAG-99N19  
ctg2821□□□WAG-6L16  
ctg2821□ctg6481□□WAG-17J1  
ctg2821□ctg6481□□WAG-120M21  
ctg2822□□□WAG-20B6  
ctg2822□□□WAG-74E16  
ctg2822□□□WAG-106P5  
ctg2822□□□WAG-124M23  
ctg2823□□□WAG-5B13  
ctg2823□ctg5809□□WAG-75K13

ctg2823□ctg5809□□WAG-104C12  
ctg2824□ctg4929□ctg5282□WAG-91H23  
ctg2824□ctg4929□ctg5282□WAG-97J9  
ctg2825□ctg4934□ctg5292□WAG-64D7  
ctg2825□ctg4934□ctg5292□WAG-79H1  
ctg2826□ctg4936□ctg5295□WAG-68O16  
ctg2826□ctg4936□ctg5295□WAG-98P19  
ctg2827□ctg4940□ctg5302□WAG-52K19  
ctg2827□ctg4940□ctg5302□WAG-71E16  
ctg2828□ctg4941□ctg5303□WAG-48H16  
ctg2828□ctg4941□ctg5303□WAG-98E15  
ctg2829□ctg4942□ctg5304□WAG-48E7  
ctg2829□ctg4942□ctg5304□WAG-58L6  
ctg283□□□WAG-25E7  
ctg283□ctg2232□ctg2129□WAG-44N24  
ctg283□ctg2232□ctg2129□WAG-46O20  
ctg283□ctg2232□ctg2129□WAG-48D13  
ctg283□ctg2232□ctg2129□WAG-120B12  
ctg283□ctg691□ctg560□WAG-43B19  
ctg283□ctg691□ctg560□WAG-48J4  
ctg283□ctg691□ctg560□WAG-49K18  
ctg283□ctg691□ctg560□WAG-88G13  
ctg283□ctg691□ctg560□WAG-120E19  
ctg2830□ctg4944□ctg5310□WAG-17D16  
ctg2830□ctg4944□ctg5310□WAG-33M15  
ctg2831□ctg4948□ctg5319□WAG-9G22  
ctg2831□ctg4948□ctg5319□WAG-45G18  
ctg2832□□□WAG-19I5  
ctg2832□ctg6124□□WAG-57J18  
ctg2832□ctg6124□□WAG-117A8  
ctg2833□□□WAG-106F20  
ctg2833□ctg6378□□WAG-25K2  
ctg2833□ctg6378□□WAG-110P12  
ctg2834□□□WAG-86B23  
ctg2834□□□WAG-107E8  
ctg2834□□□WAG-125J7  
ctg2835□□□WAG-53E20  
ctg2835□□□WAG-124D8  
ctg2835□ctg6180□□WAG-62G12  
ctg2835□ctg6180□□WAG-85J2  
ctg2836□□□WAG-17P4  
ctg2836□ctg6189□□WAG-47O18  
ctg2836□ctg6189□□WAG-72E14  
ctg2837□□□WAG-31C7  
ctg2837□ctg6093□□WAG-67O19  
ctg2837□ctg6093□□WAG-68A8  
ctg2838□□□WAG-26O1  
ctg2838□ctg6191□□WAG-30I14  
ctg2838□ctg6191□□WAG-62J1  
ctg2839□□□WAG-27M16  
ctg2839□ctg6199□□WAG-44O5  
ctg2839□ctg6199□□WAG-108F13  
ctg284□ctg694□ctg562□WAG-8H1  
ctg284□ctg694□ctg562□WAG-45B22  
ctg284□ctg694□ctg562□WAG-56J23  
ctg284□ctg694□ctg562□WAG-61B7



ctg284□ctg694□ctg562□WAG-66L12  
ctg284□ctg694□ctg562□WAG-107E9  
ctg2840□□□WAG-57B3  
ctg2840□□□WAG-79I1  
ctg2840□ctg6080□□WAG-43I3  
ctg2840□ctg6080□□WAG-126P9  
ctg2841□□□WAG-32P3  
ctg2841□□□WAG-51H12  
ctg2841□ctg5970□□WAG-43A1  
ctg2841□ctg5970□□WAG-91O17  
ctg2842□ctg4949□ctg5327□WAG-44C11  
ctg2842□ctg4949□ctg5327□WAG-121D9  
ctg2843□ctg4951□ctg5331□WAG-22G6  
ctg2843□ctg4951□ctg5331□WAG-116E10  
ctg2844□ctg4952□ctg5332□WAG-93G21  
ctg2844□ctg4952□ctg5332□WAG-114P1  
ctg2845□ctg4956□ctg5353□WAG-10K8  
ctg2845□ctg4956□ctg5353□WAG-73G20  
ctg2846□ctg4959□ctg5364□WAG-7O3  
ctg2846□ctg4959□ctg5364□WAG-37B7  
ctg2847□ctg4963□ctg5371□WAG-17J5  
ctg2847□ctg4963□ctg5371□WAG-52H22  
ctg2848□□□WAG-30H14  
ctg2848□ctg4964□□WAG-36O3  
ctg2848□ctg4964□□WAG-95O1  
ctg2848□ctg4964□□WAG-120M14  
ctg2849□□□WAG-20H13  
ctg2849□□□WAG-111N7  
ctg2849□□□WAG-112O11  
ctg285□ctg706□ctg569□WAG-3P18  
ctg285□ctg706□ctg569□WAG-29I11  
ctg285□ctg706□ctg569□WAG-61I3  
ctg285□ctg706□ctg569□WAG-62J4  
ctg285□ctg706□ctg569□WAG-64C10  
ctg285□ctg706□ctg569□WAG-92K12  
ctg285□ctg706□ctg569□WAG-128G2  
ctg2850□□□WAG-53P23  
ctg2850□□□WAG-86J9  
ctg2850□□□WAG-100L1  
ctg2851□□□WAG-16P2  
ctg2851□□□WAG-17N16  
ctg2851□□□WAG-78N22  
ctg2852□□□WAG-29I15  
ctg2852□□□WAG-41C18  
ctg2852□□□WAG-65O15  
ctg2853□□□WAG-15B23  
ctg2853□ctg6237□□WAG-89G21  
ctg2853□ctg6237□□WAG-112F4  
ctg2854□□□WAG-93C13  
ctg2854□ctg6268□□WAG-8C7  
ctg2854□ctg6268□□WAG-96B22  
ctg2855□□□WAG-72I24  
ctg2855□ctg5923□□WAG-40F17  
ctg2855□ctg5923□□WAG-118C3  
ctg2856□□□WAG-104H23  
ctg2856□ctg6163□□WAG-77M12

ctg2856□ctg6163□□WAG-102H17  
ctg2857□□□WAG-29D15  
ctg2857□ctg5964□□WAG-9F12  
ctg2857□ctg5964□□WAG-104N17  
ctg2858□ctg4965□ctg5375□WAG-68H5  
ctg2858□ctg4965□ctg5375□WAG-129A17  
ctg2859□ctg4970□ctg5385□WAG-92D7  
ctg2859□ctg4970□ctg5385□WAG-110B23  
ctg286□ctg707□□WAG-74K10  
ctg286□ctg707□ctg951□WAG-25L22  
ctg286□ctg707□ctg951□WAG-41I22  
ctg286□ctg707□ctg951□WAG-73F20  
ctg286□ctg707□ctg951□WAG-76C8  
ctg286□ctg707□ctg951□WAG-82L3  
ctg286□ctg707□ctg951□WAG-90B22  
ctg286□ctg707□ctg951□WAG-118G6  
ctg2860□ctg4971□ctg5387□WAG-100H9  
ctg2860□ctg4971□ctg5387□WAG-123A10  
ctg2861□ctg4972□ctg5389□WAG-84B19  
ctg2861□ctg4972□ctg5389□WAG-97N8  
ctg2862□ctg4973□ctg5397□WAG-57E14  
ctg2862□ctg4973□ctg5397□WAG-86C15  
ctg2863□ctg4976□ctg5401□WAG-64J7  
ctg2863□ctg4976□ctg5401□WAG-71C2  
ctg2864□ctg4977□ctg5403□WAG-66M22  
ctg2864□ctg4977□ctg5403□WAG-109D4  
ctg2865□ctg4979□ctg5409□WAG-57L10  
ctg2865□ctg4979□ctg5409□WAG-82C12  
ctg2866□ctg4980□ctg5410□WAG-50D8  
ctg2866□ctg4980□ctg5410□WAG-115F12  
ctg2867□ctg4984□ctg5419□WAG-4P16  
ctg2867□ctg4984□ctg5419□WAG-23K5  
ctg2868□ctg4985□ctg5421□WAG-22H15  
ctg2868□ctg4985□ctg5421□WAG-119M21  
ctg2869□ctg4986□ctg5427□WAG-9E10  
ctg2869□ctg4986□ctg5427□WAG-54C24  
ctg287□ctg714□ctg4649□WAG-3I10  
ctg287□ctg714□ctg4649□WAG-72P5  
ctg287□ctg714□ctg756□WAG-35I1  
ctg287□ctg714□ctg756□WAG-45O3  
ctg287□ctg714□ctg756□WAG-84N13  
ctg287□ctg714□ctg756□WAG-92H13  
ctg287□ctg714□ctg756□WAG-99D5  
ctg287□ctg714□ctg756□WAG-110E9  
ctg287□ctg714□ctg756□WAG-125H9  
ctg2870□□□WAG-20H11  
ctg2870□ctg6137□□WAG-81L10  
ctg2870□ctg6137□□WAG-123H1  
ctg2871□□□WAG-89H21  
ctg2871□ctg6542□□WAG-8O14  
ctg2871□ctg6542□□WAG-12H8  
ctg2872□□□WAG-52L22  
ctg2872□ctg6492□□WAG-7O9  
ctg2872□ctg6492□□WAG-52L21  
ctg2873□□□WAG-47L6  
ctg2873□ctg6490□□WAG-6A2

ctg2873□ctg6490□□WAG-64J5  
ctg2874□□□WAG-64E2  
ctg2874□□□WAG-112F15  
ctg2874□□□WAG-112L11  
ctg2875□□□WAG-76I24  
ctg2875□□□WAG-83N19  
ctg2875□□□WAG-97A19  
ctg2876□ctg4987□ctg5428□WAG-3N21  
ctg2876□ctg4987□ctg5428□WAG-4E1  
ctg2877□□□WAG-59G24  
ctg2877□ctg6288□□WAG-92I23  
ctg2877□ctg6288□□WAG-106H21  
ctg2878□□□WAG-63C12  
ctg2878□ctg6315□□WAG-29N6  
ctg2878□ctg6315□□WAG-42H11  
ctg2879□□□WAG-64O20  
ctg2879□□□WAG-121H3  
ctg2879□ctg6226□□WAG-26D20  
ctg2879□ctg6226□□WAG-111J10  
ctg288□□□WAG-69L7  
ctg288□ctg1569□ctg1412□WAG-27D13  
ctg288□ctg1569□ctg1412□WAG-39I19  
ctg288□ctg1569□ctg1412□WAG-45H23  
ctg288□ctg1569□ctg1412□WAG-120I7  
ctg288□ctg3039□ctg3034□WAG-80L8  
ctg288□ctg3039□ctg3034□WAG-92H5  
ctg288□ctg3039□ctg3034□WAG-114L4  
ctg288□ctg810□ctg1446□WAG-9O7  
ctg288□ctg810□ctg1446□WAG-13E1  
ctg288□ctg810□ctg1446□WAG-17I9  
ctg288□ctg810□ctg1446□WAG-23F15  
ctg288□ctg810□ctg1446□WAG-48N11  
ctg288□ctg810□ctg1446□WAG-69C9  
ctg288□ctg810□ctg1446□WAG-97L4  
ctg288□ctg810□ctg1446□WAG-106A23  
ctg288□ctg810□ctg1446□WAG-129N14  
ctg2880□□□WAG-10K21  
ctg2880□□□WAG-27D23  
ctg2880□□□WAG-110I19  
ctg2880□ctg6325□□WAG-13E14  
ctg2880□ctg6325□□WAG-84G15  
ctg2881□□□WAG-30M4  
ctg2881□□□WAG-77A20  
ctg2881□□□WAG-82B17  
ctg2881□□□WAG-93K15  
ctg2882□□□WAG-10G7  
ctg2882□□□WAG-16D14  
ctg2882□□□WAG-21L8  
ctg2882□□□WAG-39I20  
ctg2882□□□WAG-50C14  
ctg2883□ctg4996□ctg5444□WAG-93C12  
ctg2883□ctg4996□ctg5444□WAG-108E7  
ctg2884□ctg4999□ctg5452□WAG-77I18  
ctg2884□ctg4999□ctg5452□WAG-98O3  
ctg2885□ctg5000□ctg5453□WAG-6B23  
ctg2885□ctg5000□ctg5453□WAG-66B2

ctg2886□ctg5001□ctg5455□WAG-52M24  
ctg2886□ctg5001□ctg5455□WAG-64J18  
ctg2887□ctg5003□ctg5462□WAG-54B5  
ctg2887□ctg5003□ctg5462□WAG-96F15  
ctg2888□ctg5007□ctg5477□WAG-4N17  
ctg2888□ctg5007□ctg5477□WAG-7O21  
ctg2889□□□WAG-56P21  
ctg2889□□□WAG-123O10  
ctg2889□□□WAG-129C1  
ctg289□ctg713□□WAG-35H9  
ctg289□ctg713□ctg6124□WAG-1M6  
ctg289□ctg713□ctg6124□WAG-99O2  
ctg289□ctg713□ctg958□WAG-21P3  
ctg289□ctg713□ctg958□WAG-62P21  
ctg289□ctg713□ctg958□WAG-74P20  
ctg289□ctg713□ctg958□WAG-110L15  
ctg289□ctg713□ctg958□WAG-116I8  
ctg2890□□□WAG-40I9  
ctg2890□□□WAG-103P5  
ctg2890□□□WAG-109D6  
ctg2891□□□WAG-19F21  
ctg2891□□□WAG-77M17  
ctg2891□□□WAG-100L11  
ctg2892□□□WAG-3I17  
ctg2892□□□WAG-85G11  
ctg2892□□□WAG-121E17  
ctg2893□□□WAG-19E3  
ctg2893□□□WAG-44F2  
ctg2893□□□WAG-92E3  
ctg2894□□□WAG-18P21  
ctg2894□□□WAG-20N2  
ctg2894□□□WAG-31M1  
ctg2894□□□WAG-107I8  
ctg2895□□□WAG-90D18  
ctg2895□ctg6094□□WAG-53A1  
ctg2895□ctg6094□□WAG-78D13  
ctg2896□□□WAG-5A20  
ctg2896□ctg6329□□WAG-99K23  
ctg2896□ctg6329□□WAG-115G12  
ctg2897□ctg5011□ctg5488□WAG-54B18  
ctg2897□ctg5011□ctg5488□WAG-125G11  
ctg2898□ctg5015□ctg5494□WAG-29O1  
ctg2898□ctg5015□ctg5494□WAG-116E13  
ctg2899□ctg5019□ctg5507□WAG-4E4  
ctg2899□ctg5019□ctg5507□WAG-69P24  
ctg29□ctg169□□WAG-38D18  
ctg29□ctg169□□WAG-127K15  
ctg29□ctg169□ctg2085□WAG-23J1  
ctg29□ctg169□ctg2085□WAG-23P9  
ctg29□ctg169□ctg2085□WAG-37D18  
ctg29□ctg169□ctg2085□WAG-53B14  
ctg29□ctg169□ctg2085□WAG-93P5  
ctg29□ctg169□ctg2085□WAG-108I22  
ctg29□ctg169□ctg2085□WAG-113F15  
ctg29□ctg169□ctg2085□WAG-116K20  
ctg29□ctg169□ctg233□WAG-18E15

ctg29□ctg169□ctg233□WAG-18H22  
ctg29□ctg169□ctg233□WAG-30L14  
ctg29□ctg169□ctg233□WAG-33A20  
ctg29□ctg169□ctg233□WAG-40N11  
ctg29□ctg169□ctg233□WAG-61O11  
ctg29□ctg169□ctg233□WAG-71N10  
ctg29□ctg169□ctg233□WAG-76P2  
ctg29□ctg169□ctg233□WAG-84O19  
ctg29□ctg169□ctg233□WAG-89D15  
ctg29□ctg169□ctg233□WAG-99A20  
ctg29□ctg169□ctg233□WAG-100J2  
ctg29□ctg169□ctg233□WAG-102N11  
ctg29□ctg169□ctg233□WAG-103G20  
ctg29□ctg169□ctg233□WAG-106B15  
ctg29□ctg169□ctg233□WAG-117P15  
ctg29□ctg169□ctg233□WAG-119B3  
ctg29□ctg169□ctg233□WAG-121E12  
ctg290□□□WAG-55O21  
ctg290□ctg4464□□WAG-46H5  
ctg290□ctg4464□ctg6785□WAG-79P12  
ctg290□ctg4464□ctg6785□WAG-112K20  
ctg290□ctg858□ctg6435□WAG-14B3  
ctg290□ctg858□ctg6435□WAG-76M13  
ctg290□ctg858□ctg702□WAG-11J4  
ctg290□ctg858□ctg702□WAG-20G5  
ctg290□ctg858□ctg702□WAG-21E14  
ctg290□ctg858□ctg702□WAG-84F13  
ctg290□ctg858□ctg702□WAG-108C24  
ctg2900□ctg5023□ctg5515□WAG-34M22  
ctg2900□ctg5023□ctg5515□WAG-47G2  
ctg2901□ctg5026□ctg5521□WAG-18B9  
ctg2901□ctg5026□ctg5521□WAG-109I23  
ctg2902□□□WAG-12O3  
ctg2902□□□WAG-92N2  
ctg2902□ctg6203□□WAG-33G19  
ctg2902□ctg6203□□WAG-89I8  
ctg2903□□□WAG-20O20  
ctg2903□ctg6047□□WAG-28G7  
ctg2903□ctg6047□□WAG-113O20  
ctg2904□□□WAG-59G19  
ctg2904□□□WAG-61H16  
ctg2904□□□WAG-88F1  
ctg2904□ctg6043□□WAG-17A15  
ctg2904□ctg6043□□WAG-117L6  
ctg2905□ctg5028□ctg5525□WAG-27P21  
ctg2905□ctg5028□ctg5525□WAG-92L12  
ctg2906□ctg5030□ctg5527□WAG-52A16  
ctg2906□ctg5030□ctg5527□WAG-74H13  
ctg2907□ctg5031□ctg5528□WAG-72D13  
ctg2907□ctg5031□ctg5528□WAG-101D7  
ctg2908□□□WAG-55D16  
ctg2908□□□WAG-79K9  
ctg2908□□□WAG-120E17  
ctg2909□ctg5033□ctg5531□WAG-90M7  
ctg2909□ctg5033□ctg5531□WAG-125M1  
ctg291□ctg747□ctg607□WAG-60G23

ctg291□ctg747□ctg607□WAG-61B18  
ctg291□ctg747□ctg607□WAG-72D6  
ctg291□ctg747□ctg607□WAG-85N2  
ctg291□ctg747□ctg607□WAG-86D23  
ctg291□ctg747□ctg607□WAG-91D18  
ctg291□ctg747□ctg607□WAG-96E17  
ctg291□ctg747□ctg607□WAG-122K14  
ctg2910□ctg5034□ctg5533□WAG-94M18  
ctg2910□ctg5034□ctg5533□WAG-124F11  
ctg2911□ctg5035□ctg5536□WAG-91O10  
ctg2911□ctg5035□ctg5536□WAG-119J6  
ctg2912□ctg5037□ctg5543□WAG-74M9  
ctg2912□ctg5037□ctg5543□WAG-99N24  
ctg2913□□□WAG-30B2  
ctg2913□□□WAG-120G1  
ctg2913□ctg6500□□WAG-17D6  
ctg2913□ctg6500□□WAG-53I1  
ctg2914□□□WAG-91A1  
ctg2914□ctg6250□□WAG-37P10  
ctg2914□ctg6250□□WAG-52G5  
ctg2915□□□WAG-86P10  
ctg2915□ctg5918□ctg6954□WAG-58C22  
ctg2915□ctg5918□ctg6954□WAG-62L1  
ctg2916□□□WAG-10P7  
ctg2916□□□WAG-19I23  
ctg2916□□□WAG-95P16  
ctg2916□□□WAG-115P10  
ctg2917□□□WAG-51N6  
ctg2917□□□WAG-57H24  
ctg2917□□□WAG-124P11  
ctg2918□□□WAG-19E12  
ctg2918□□□WAG-42M12  
ctg2918□□□WAG-64B1  
ctg2919□ctg5049□ctg5576□WAG-23D24  
ctg2919□ctg5049□ctg5576□WAG-129P2  
ctg292□□□WAG-116F7  
ctg292□ctg1013□ctg963□WAG-14H22  
ctg292□ctg1013□ctg963□WAG-15G7  
ctg292□ctg1013□ctg963□WAG-33M1  
ctg292□ctg1013□ctg963□WAG-53F2  
ctg292□ctg1013□ctg963□WAG-74M8  
ctg292□ctg1013□ctg963□WAG-77D17  
ctg292□ctg1013□ctg963□WAG-128E7  
ctg292□ctg2509□ctg2435□WAG-40N6  
ctg292□ctg2509□ctg2435□WAG-104K2  
ctg292□ctg2509□ctg2435□WAG-120P20  
ctg292□ctg865□ctg709□WAG-37P19  
ctg292□ctg865□ctg709□WAG-51B9  
ctg292□ctg865□ctg709□WAG-78D8  
ctg292□ctg865□ctg709□WAG-96I9  
ctg292□ctg865□ctg709□WAG-104C6  
ctg292□ctg865□ctg709□WAG-105N15  
ctg292□ctg865□ctg709□WAG-107G10  
ctg292□ctg865□ctg709□WAG-124A8  
ctg2920□ctg5050□ctg5577□WAG-69F8  
ctg2920□ctg5050□ctg5577□WAG-128F23

ctg2921□ctg5053□ctg5581□WAG-58B15  
ctg2921□ctg5053□ctg5581□WAG-118L16  
ctg2922□ctg5055□ctg5583□WAG-58J8  
ctg2922□ctg5055□ctg5583□WAG-112D24  
ctg2923□ctg5056□ctg5584□WAG-94B23  
ctg2923□ctg5056□ctg5584□WAG-110E6  
ctg2924□ctg5059□ctg5590□WAG-67O13  
ctg2924□ctg5059□ctg5590□WAG-102L3  
ctg2925□ctg5062□ctg5594□WAG-57O1  
ctg2925□ctg5062□ctg5594□WAG-64H18  
ctg2926□ctg5064□ctg5597□WAG-44E20  
ctg2926□ctg5064□ctg5597□WAG-126L23  
ctg2927□ctg5065□ctg5599□WAG-20P6  
ctg2927□ctg5065□ctg5599□WAG-106F16  
ctg2928□□□WAG-29B20  
ctg2928□□□WAG-106L17  
ctg2928□ctg6175□□WAG-114E5  
ctg2928□ctg6175□□WAG-119C2  
ctg2929□□□WAG-57B16  
ctg2929□ctg6119□□WAG-75J17  
ctg2929□ctg6119□□WAG-129H3  
ctg293□□□WAG-38I20  
ctg293□□□WAG-43C15  
ctg293□ctg6210□□WAG-10H16  
ctg293□ctg6210□□WAG-82I7  
ctg293□ctg988□ctg1005□WAG-23B23  
ctg293□ctg988□ctg1005□WAG-28J23  
ctg293□ctg988□ctg1005□WAG-44H3  
ctg293□ctg988□ctg1005□WAG-54M15  
ctg293□ctg988□ctg1005□WAG-72A2  
ctg293□ctg988□ctg1005□WAG-77N6  
ctg2930□□□WAG-88H19  
ctg2930□ctg6472□□WAG-40B19  
ctg2930□ctg6472□□WAG-62O11  
ctg2931□□□WAG-64E14  
ctg2931□ctg6454□□WAG-20N22  
ctg2931□ctg6454□□WAG-117C24  
ctg2932□ctg5068□ctg5607□WAG-95P17  
ctg2932□ctg5068□ctg5607□WAG-119K22  
ctg2933□□□WAG-19D17  
ctg2933□□□WAG-29O10  
ctg2933□ctg5076□ctg5627□WAG-25J13  
ctg2933□ctg5076□ctg5627□WAG-54C17  
ctg2934□□□WAG-6K13  
ctg2934□□□WAG-41C11  
ctg2934□□□WAG-88J22  
ctg2934□□□WAG-93J15  
ctg2935□□□WAG-43K15  
ctg2935□□□WAG-67B9  
ctg2935□□□WAG-114A18  
ctg2936□□□WAG-99D4  
ctg2936□□□WAG-108O20  
ctg2936□ctg6456□□WAG-7P6  
ctg2936□ctg6456□□WAG-109P9  
ctg2937□ctg5079□ctg5633□WAG-94K16  
ctg2937□ctg5079□ctg5633□WAG-104N9

ctg2938□□□WAG-10K14  
ctg2938□□□WAG-55L10  
ctg2938□□□WAG-120D18  
ctg2939□□□WAG-35J4  
ctg2939□□□WAG-70G20  
ctg2939□□□WAG-128H17  
ctg294□□□WAG-4D12  
ctg294□□□WAG-68K10  
ctg294□ctg4491□□WAG-63L4  
ctg294□ctg4491□□WAG-86G18  
ctg294□ctg4491□□WAG-88C24  
ctg294□ctg996□□WAG-52C21  
ctg294□ctg996□ctg3041□WAG-92C6  
ctg294□ctg996□ctg3041□WAG-95J6  
ctg294□ctg996□ctg3041□WAG-101H24  
ctg294□ctg996□ctg3439□WAG-22F16  
ctg294□ctg996□ctg3439□WAG-66P9  
ctg294□ctg996□ctg3439□WAG-106B18  
ctg294□ctg996□ctg841□WAG-3P12  
ctg294□ctg996□ctg841□WAG-23I11  
ctg294□ctg996□ctg841□WAG-40L20  
ctg294□ctg996□ctg841□WAG-100E4  
ctg2940□ctg5085□ctg5659□WAG-30C10  
ctg2940□ctg5085□ctg5659□WAG-96O11  
ctg2941□ctg5087□ctg5663□WAG-49C5  
ctg2941□ctg5087□ctg5663□WAG-118M11  
ctg2942□□□WAG-84N17  
ctg2942□ctg6565□□WAG-42I24  
ctg2942□ctg6565□□WAG-104M9  
ctg2943□□□WAG-2K17  
ctg2943□□□WAG-28P17  
ctg2943□□□WAG-47N13  
ctg2944□□□WAG-27J5  
ctg2944□□□WAG-28L20  
ctg2944□□□WAG-130O11  
ctg2945□□□WAG-17F20  
ctg2945□□□WAG-38P23  
ctg2945□□□WAG-45P2  
ctg2945□□□WAG-124L12  
ctg2946□□□WAG-66C22  
ctg2946□□□WAG-75L5  
ctg2946□□□WAG-90J8  
ctg2946□□□WAG-112H22  
ctg2947□□□WAG-98L20  
ctg2947□ctg6412□□WAG-21E15  
ctg2947□ctg6412□□WAG-61J6  
ctg2948□□□WAG-41K5  
ctg2948□ctg6527□□WAG-2I19  
ctg2948□ctg6527□□WAG-4A21  
ctg2949□ctg5091□ctg5667□WAG-113L15  
ctg2949□ctg5091□ctg5667□WAG-129M1  
ctg295□□□WAG-43N24  
ctg295□□□WAG-117B18  
ctg295□ctg1210□□WAG-82P22  
ctg295□ctg1210□□WAG-124L22  
ctg295□ctg1210□ctg1057□WAG-39L23



ctg295□ctg1210□ctg1057□WAG-51D6  
ctg295□ctg1210□ctg1057□WAG-56E20  
ctg295□ctg1210□ctg1057□WAG-109F1  
ctg2950□ctg5095□ctg5674□WAG-27E17  
ctg2950□ctg5095□ctg5674□WAG-107M1  
ctg2951□ctg5096□ctg5675□WAG-9F1  
ctg2951□ctg5096□ctg5675□WAG-107K10  
ctg2952□ctg5099□ctg5687□WAG-36P2  
ctg2952□ctg5099□ctg5687□WAG-43K8  
ctg2953□□□WAG-44I20  
ctg2953□□□WAG-105E24  
ctg2953□□□WAG-113G10  
ctg2954□□□WAG-75D7  
ctg2954□□□WAG-90M10  
ctg2954□□□WAG-104H10  
ctg2955□□□WAG-41I1  
ctg2955□□□WAG-63C22  
ctg2955□□□WAG-78G7  
ctg2956□□□WAG-42G16  
ctg2956□□□WAG-86G15  
ctg2956□□□WAG-105O13  
ctg2957□ctg5102□ctg5695□WAG-80M7  
ctg2957□ctg5102□ctg5695□WAG-103K1  
ctg2958□□□WAG-32P15  
ctg2958□□□WAG-39M5  
ctg2958□□□WAG-103E22  
ctg2959□□□WAG-7J15  
ctg2959□ctg6211□□WAG-10A8  
ctg2959□ctg6211□□WAG-116P5  
ctg296□ctg730□□WAG-24I22  
ctg296□ctg730□ctg4131□WAG-44H5  
ctg296□ctg730□ctg4131□WAG-83G6  
ctg296□ctg730□ctg4131□WAG-124B6  
ctg296□ctg730□ctg4735□WAG-83L20  
ctg296□ctg730□ctg4735□WAG-112A1  
ctg296□ctg730□ctg769□WAG-49D8  
ctg296□ctg730□ctg769□WAG-64G3  
ctg296□ctg730□ctg769□WAG-76I3  
ctg296□ctg730□ctg769□WAG-86L24  
ctg296□ctg730□ctg769□WAG-127P22  
ctg2960□□□WAG-14H11  
ctg2960□ctg6531□□WAG-105J11  
ctg2960□ctg6531□□WAG-120O20  
ctg2961□ctg5109□ctg5711□WAG-99M8  
ctg2961□ctg5109□ctg5711□WAG-126L1  
ctg2962□ctg5110□ctg5719□WAG-27A10  
ctg2962□ctg5110□ctg5719□WAG-87G5  
ctg2963□ctg5111□ctg5720□WAG-14D19  
ctg2963□ctg5111□ctg5720□WAG-87E12  
ctg2964□ctg5112□ctg5723□WAG-67P12  
ctg2964□ctg5112□ctg5723□WAG-126J5  
ctg2965□ctg5116□ctg5732□WAG-44L20  
ctg2965□ctg5116□ctg5732□WAG-75B18  
ctg2966□ctg5117□ctg5734□WAG-26N9  
ctg2966□ctg5117□ctg5734□WAG-78P10  
ctg2967□ctg5118□ctg5735□WAG-11A23

ctg2967□ctg5118□ctg5735□WAG-18C23  
ctg2968□□□WAG-48A4  
ctg2968□□□WAG-63H18  
ctg2968□□□WAG-107B16  
ctg2969□□□WAG-19N2  
ctg2969□□□WAG-39D11  
ctg2969□□□WAG-52O11  
ctg297□□□WAG-70I10  
ctg297□ctg2399□□WAG-13L11  
ctg297□ctg2399□ctg4068□WAG-75A24  
ctg297□ctg2399□ctg4068□WAG-91A23  
ctg297□ctg2399□ctg5105□WAG-54A13  
ctg297□ctg2399□ctg5105□WAG-94E12  
ctg297□ctg972□ctg818□WAG-25M9  
ctg297□ctg972□ctg818□WAG-52D19  
ctg297□ctg972□ctg818□WAG-57L3  
ctg297□ctg972□ctg818□WAG-121B16  
ctg2970□□□WAG-61I16  
ctg2970□ctg6549□□WAG-41A20  
ctg2970□ctg6549□□WAG-74E4  
ctg2971□□□WAG-21O9  
ctg2971□□□WAG-61O19  
ctg2971□□□WAG-108K16  
ctg2972□ctg5119□ctg5737□WAG-69B19  
ctg2972□ctg5119□ctg5737□WAG-121F7  
ctg2973□ctg5120□ctg5738□WAG-51L24  
ctg2973□ctg5120□ctg5738□WAG-76K2  
ctg2974□ctg5121□ctg5740□WAG-37D19  
ctg2974□ctg5121□ctg5740□WAG-112M7  
ctg2975□□□WAG-65I4  
ctg2975□□□WAG-100F24  
ctg2975□□□WAG-102A15  
ctg2976□□□WAG-22G7  
ctg2976□ctg6553□□WAG-3G3  
ctg2976□ctg6553□□WAG-10G19  
ctg2977□ctg5125□ctg5751□WAG-77L9  
ctg2977□ctg5125□ctg5751□WAG-78K8  
ctg2978□ctg5128□ctg5758□WAG-51P1  
ctg2978□ctg5128□ctg5758□WAG-93B15  
ctg2979□ctg5129□ctg5759□WAG-50H8  
ctg2979□ctg5129□ctg5759□WAG-59N21  
ctg298□□□WAG-25G6  
ctg298□□□WAG-32G19  
ctg298□□□WAG-73G11  
ctg298□ctg1348□□WAG-11E21  
ctg298□ctg1348□□WAG-105K22  
ctg298□ctg1348□ctg1518□WAG-10A2  
ctg298□ctg1348□ctg1518□WAG-19I13  
ctg298□ctg1348□ctg1518□WAG-26A4  
ctg298□ctg1348□ctg1518□WAG-40M22  
ctg298□ctg1348□ctg1518□WAG-88N6  
ctg298□ctg1348□ctg1518□WAG-129F12  
ctg298□ctg1348□ctg3691□WAG-22N9  
ctg298□ctg1348□ctg3691□WAG-41H14  
ctg298□ctg1348□ctg3691□WAG-85K12  
ctg298□ctg1348□ctg3691□WAG-111A20

ctg2980□ctg5131□ctg5765□WAG-33J5  
ctg2980□ctg5131□ctg5765□WAG-92P8  
ctg2981□□□WAG-29N12  
ctg2981□□□WAG-86E17  
ctg2981□□□WAG-113D19  
ctg2982□□□WAG-27F8  
ctg2982□□□WAG-78J6  
ctg2982□□□WAG-112E18  
ctg2983□□□WAG-26I21  
ctg2983□□□WAG-36J4  
ctg2983□□□WAG-111D4  
ctg2984□□□WAG-16A17  
ctg2984□□□WAG-50C15  
ctg2984□□□WAG-94I2  
ctg2985□□□WAG-90P14  
ctg2985□□□WAG-94D5  
ctg2985□□□WAG-109F17  
ctg2986□□□WAG-12E4  
ctg2986□□□WAG-80P5  
ctg2986□□□WAG-128O14  
ctg2987□□□WAG-2K14  
ctg2987□□□WAG-63N14  
ctg2987□□□WAG-71C10  
ctg2988□□□WAG-26F15  
ctg2988□□□WAG-52L2  
ctg2988□□□WAG-66C24  
ctg2989□□□WAG-51O19  
ctg2989□□□WAG-74H3  
ctg2989□□□WAG-128B6  
ctg299□□□WAG-1N23  
ctg299□□□WAG-96P19  
ctg299□ctg1277□ctg1972□WAG-41K11  
ctg299□ctg1277□ctg1972□WAG-48H6  
ctg299□ctg1277□ctg1972□WAG-95M24  
ctg299□ctg1277□ctg1972□WAG-105J19  
ctg299□ctg1277□ctg1972□WAG-117M6  
ctg299□ctg1277□ctg1972□WAG-123L1  
ctg299□ctg1277□ctg5688□WAG-36G11  
ctg299□ctg1277□ctg5688□WAG-36J13  
ctg299□ctg1826□ctg1655□WAG-15C21  
ctg299□ctg1826□ctg1655□WAG-45D10  
ctg299□ctg1826□ctg1655□WAG-59K15  
ctg299□ctg1826□ctg1655□WAG-63J9  
ctg299□ctg1826□ctg1655□WAG-78N4  
ctg299□ctg1826□ctg5518□WAG-5N3  
ctg299□ctg1826□ctg5518□WAG-27B17  
ctg299□ctg928□ctg874□WAG-24G9  
ctg299□ctg928□ctg874□WAG-30K24  
ctg299□ctg928□ctg874□WAG-56C14  
ctg299□ctg928□ctg874□WAG-65D19  
ctg299□ctg928□ctg874□WAG-76E10  
ctg299□ctg928□ctg874□WAG-83B16  
ctg299□ctg928□ctg874□WAG-93F5  
ctg2990□□□WAG-10N5  
ctg2990□□□WAG-18M19  
ctg2990□□□WAG-105M8

ctg2991□ctg5135□ctg5773□WAG-6G13  
ctg2991□ctg5135□ctg5773□WAG-61O15  
ctg2992□□□WAG-34K6  
ctg2992□□□WAG-45P14  
ctg2992□□□WAG-103L12  
ctg2992□□□WAG-123L10  
ctg2993□□□WAG-2O11  
ctg2993□□□WAG-9L13  
ctg2993□□□WAG-21N19  
ctg2994□□□WAG-68D1  
ctg2994□ctg6370□□WAG-9E6  
ctg2994□ctg6370□□WAG-121K18  
ctg2995□ctg5142□ctg5789□WAG-97M6  
ctg2995□ctg5142□ctg5789□WAG-120I6  
ctg2996□ctg5143□ctg5791□WAG-55G11  
ctg2996□ctg5143□ctg5791□WAG-95K4  
ctg2997□ctg5153□ctg5824□WAG-19P18  
ctg2997□ctg5153□ctg5824□WAG-80C6  
ctg2998□□□WAG-30G21  
ctg2998□□□WAG-91C23  
ctg2998□□□WAG-129I12  
ctg2999□□□WAG-8N21  
ctg2999□□□WAG-110O3  
ctg2999□□□WAG-114J18  
ctg3□□□WAG-38O16  
ctg3□ctg3195□□WAG-94A1  
ctg3□ctg3195□ctg3217□WAG-113H6  
ctg3□ctg3195□ctg3217□WAG-119K2  
ctg3□ctg3195□ctg3217□WAG-121K13  
ctg3□ctg3195□ctg3217□WAG-129J16  
ctg3□ctg4684□ctg4852□WAG-82F17  
ctg3□ctg4684□ctg4852□WAG-110G8  
ctg30□ctg136□ctg106□WAG-9P19  
ctg30□ctg136□ctg106□WAG-23D19  
ctg30□ctg136□ctg106□WAG-50B1  
ctg30□ctg136□ctg106□WAG-56F17  
ctg30□ctg136□ctg106□WAG-71H8  
ctg30□ctg136□ctg106□WAG-72C12  
ctg30□ctg136□ctg106□WAG-109O16  
ctg30□ctg136□ctg106□WAG-118B16  
ctg30□ctg136□ctg106□WAG-124E11  
ctg300□□□WAG-44M8  
ctg300□□□WAG-100N6  
ctg300□□□WAG-108C16  
ctg300□ctg1018□□WAG-25L8  
ctg300□ctg1018□ctg1121□WAG-30E9  
ctg300□ctg1018□ctg1121□WAG-31M20  
ctg300□ctg1018□ctg1121□WAG-34B11  
ctg300□ctg1018□ctg1121□WAG-34O15  
ctg300□ctg1018□ctg1121□WAG-56A4  
ctg300□ctg1018□ctg1121□WAG-71G3  
ctg300□ctg1018□ctg1121□WAG-110G4  
ctg300□ctg1018□ctg1121□WAG-118H11  
ctg3000□□□WAG-17A12  
ctg3000□□□WAG-95L16  
ctg3000□□□WAG-107J13

ctg3000□□□WAG-126O20  
ctg3001□□□WAG-56A13  
ctg3001□□□WAG-70F10  
ctg3001□□□WAG-86I12  
ctg3002□□□WAG-89N24  
ctg3002□ctg5878□ctg6943□WAG-7J22  
ctg3002□ctg5878□ctg6943□WAG-17B7  
ctg3003□ctg5160□ctg5842□WAG-48A18  
ctg3003□ctg5160□ctg5842□WAG-120P11  
ctg3004□ctg5162□ctg5852□WAG-39C24  
ctg3004□ctg5162□ctg5852□WAG-83O20  
ctg3005□ctg5163□ctg5856□WAG-62H16  
ctg3005□ctg5163□ctg5856□WAG-76M16  
ctg3006□ctg5165□ctg5859□WAG-60L13  
ctg3006□ctg5165□ctg5859□WAG-95A14  
ctg3007□ctg5166□ctg5860□WAG-34E18  
ctg3007□ctg5166□ctg5860□WAG-57B5  
ctg3008□ctg5169□ctg5865□WAG-41G6  
ctg3008□ctg5169□ctg5865□WAG-55N24  
ctg3009□ctg5172□ctg5868□WAG-33I17  
ctg3009□ctg5172□ctg5868□WAG-80D1  
ctg301□ctg1488□□WAG-7A13  
ctg301□ctg1488□□WAG-19E11  
ctg301□ctg1488□□WAG-24L17  
ctg301□ctg1488□ctg2970□WAG-29K8  
ctg301□ctg1488□ctg2970□WAG-107H4  
ctg301□ctg1488□ctg2970□WAG-120B7  
ctg301□ctg1488□ctg2970□WAG-125E12  
ctg301□ctg1488□ctg6892□WAG-5C12  
ctg301□ctg1488□ctg6892□WAG-119D14  
ctg301□ctg1723□ctg1566□WAG-14K19  
ctg301□ctg1723□ctg1566□WAG-27F22  
ctg301□ctg1723□ctg1566□WAG-30I23  
ctg301□ctg1723□ctg1566□WAG-52B12  
ctg301□ctg1723□ctg1566□WAG-68I11  
ctg301□ctg1723□ctg1566□WAG-74M2  
ctg301□ctg1723□ctg1566□WAG-107M21  
ctg301□ctg1723□ctg1566□WAG-119E17  
ctg3010□ctg5173□ctg5871□WAG-20K11  
ctg3010□ctg5173□ctg5871□WAG-38P21  
ctg3011□ctg5174□ctg5873□WAG-15P3  
ctg3011□ctg5174□ctg5873□WAG-101K12  
ctg3012□□□WAG-91L9  
ctg3012□□□WAG-99P23  
ctg3012□□□WAG-118E7  
ctg3013□□□WAG-31B20  
ctg3013□□□WAG-89P9  
ctg3013□□□WAG-123D14  
ctg3014□□□WAG-38M3  
ctg3014□□□WAG-66M10  
ctg3014□□□WAG-84A3  
ctg3015□□□WAG-15A12  
ctg3015□□□WAG-27J19  
ctg3015□□□WAG-39O20  
ctg3016□ctg5184□ctg5889□WAG-52D8  
ctg3016□ctg5184□ctg5889□WAG-113F7

ctg3017□ctg5186□ctg5891□WAG-37A18  
ctg3017□ctg5186□ctg5891□WAG-110M21  
ctg3018□ctg5189□ctg5896□WAG-62G17  
ctg3018□ctg5189□ctg5896□WAG-104K6  
ctg3019□ctg5195□ctg5908□WAG-80L1  
ctg3019□ctg5195□ctg5908□WAG-121M5  
ctg302□ctg1156□□WAG-94C23  
ctg302□ctg1156□ctg2384□WAG-38E19  
ctg302□ctg1156□ctg2384□WAG-57N6  
ctg302□ctg1156□ctg2384□WAG-59F4  
ctg302□ctg1156□ctg2384□WAG-63M15  
ctg302□ctg1156□ctg2384□WAG-75D20  
ctg302□ctg1156□ctg2384□WAG-78I6  
ctg302□ctg1156□ctg2384□WAG-79A15  
ctg302□ctg1156□ctg2384□WAG-82M20  
ctg302□ctg1156□ctg2384□WAG-84F12  
ctg302□ctg5340□ctg6259□WAG-78J19  
ctg302□ctg5340□ctg6259□WAG-91L5  
ctg3020□ctg5203□ctg5927□WAG-50M1  
ctg3020□ctg5203□ctg5927□WAG-53N10  
ctg3021□ctg5211□ctg5947□WAG-110I17  
ctg3021□ctg5211□ctg5947□WAG-113I4  
ctg3022□□□WAG-42K6  
ctg3022□□□WAG-116H24  
ctg3022□□□WAG-125F18  
ctg3023□ctg5217□ctg5969□WAG-51O20  
ctg3023□ctg5217□ctg5969□WAG-69A6  
ctg3024□ctg5220□ctg5975□WAG-21C9  
ctg3024□ctg5220□ctg5975□WAG-55H5  
ctg3025□ctg5222□ctg5978□WAG-37F10  
ctg3025□ctg5222□ctg5978□WAG-99L12  
ctg3026□ctg5223□ctg5979□WAG-29O13  
ctg3026□ctg5223□ctg5979□WAG-125H18  
ctg3027□□□WAG-41D15  
ctg3027□□□WAG-86F16  
ctg3027□□□WAG-123D11  
ctg3028□□□WAG-26H6  
ctg3028□□□WAG-111P6  
ctg3028□ctg5501□ctg6603□WAG-38A23  
ctg3028□ctg5501□ctg6603□WAG-109J15  
ctg3029□□□WAG-31K19  
ctg3029□□□WAG-85M2  
ctg3029□□□WAG-109D2  
ctg303□□□WAG-6C1  
ctg303□□□WAG-86H1  
ctg303□ctg1050□□WAG-69I24  
ctg303□ctg1050□□WAG-117C7  
ctg303□ctg1050□ctg1338□WAG-9C6  
ctg303□ctg1050□ctg1338□WAG-10A24  
ctg303□ctg1050□ctg1338□WAG-22H3  
ctg303□ctg1050□ctg1338□WAG-22O21  
ctg303□ctg1050□ctg1338□WAG-34D5  
ctg303□ctg1050□ctg1338□WAG-111F13  
ctg303□ctg1050□ctg1338□WAG-117I21  
ctg303□ctg1050□ctg1338□WAG-130J11  
ctg303□ctg1050□ctg1550□WAG-12K16

ctg303□ctg1050□ctg1550□WAG-15M8  
ctg303□ctg1050□ctg1550□WAG-18M23  
ctg303□ctg1050□ctg1550□WAG-56O23  
ctg303□ctg1050□ctg1550□WAG-65B1  
ctg303□ctg1050□ctg1550□WAG-74B20  
ctg303□ctg1050□ctg1550□WAG-81E14  
ctg303□ctg1050□ctg1550□WAG-87I1  
ctg303□ctg1050□ctg1550□WAG-100L14  
ctg303□ctg1050□ctg1550□WAG-105D24  
ctg303□ctg1050□ctg1550□WAG-128O12  
ctg3030□□□WAG-13C5  
ctg3030□□□WAG-72I2  
ctg3030□□□WAG-102H21  
ctg3031□□□WAG-96C17  
ctg3031□□□WAG-102E19  
ctg3031□□□WAG-120K7  
ctg3032□□□WAG-61O21  
ctg3032□□□WAG-85J15  
ctg3032□□□WAG-87F5  
ctg3033□□□WAG-20J24  
ctg3033□□□WAG-52C19  
ctg3033□□□WAG-118I8  
ctg3034□□□WAG-20D21  
ctg3034□□□WAG-34E11  
ctg3034□□□WAG-36J17  
ctg3035□□□WAG-16C20  
ctg3035□□□WAG-54J19  
ctg3035□□□WAG-123O17  
ctg3036□□□WAG-8I16  
ctg3036□□□WAG-50P22  
ctg3036□□□WAG-85L7  
ctg3037□□□WAG-118I22  
ctg3037□ctg6509□□WAG-45B10  
ctg3037□ctg6509□□WAG-117K2  
ctg3038□ctg5232□ctg6003□WAG-61F8  
ctg3038□ctg5232□ctg6003□WAG-107L3  
ctg3039□ctg5234□ctg6007□WAG-9K11  
ctg3039□ctg5234□ctg6007□WAG-99J8  
ctg304□ctg1821□ctg1649□WAG-38A13  
ctg304□ctg1821□ctg1649□WAG-56O7  
ctg304□ctg1821□ctg1649□WAG-60F13  
ctg304□ctg1821□ctg1649□WAG-73P9  
ctg304□ctg3623□ctg3808□WAG-108D2  
ctg304□ctg3623□ctg3808□WAG-112M20  
ctg304□ctg3623□ctg6170□WAG-52C14  
ctg304□ctg3623□ctg6170□WAG-127O10  
ctg304□ctg3743□□□WAG-63I24  
ctg304□ctg3743□ctg5174□WAG-94J4  
ctg304□ctg3743□ctg5174□WAG-125C3  
ctg3040□ctg5235□ctg6009□WAG-95M19  
ctg3040□ctg5235□ctg6009□WAG-111H12  
ctg3041□ctg5237□ctg6016□WAG-81O8  
ctg3041□ctg5237□ctg6016□WAG-106K1  
ctg3042□ctg5238□ctg6019□WAG-36G7  
ctg3042□ctg5238□ctg6019□WAG-75L21  
ctg3043□ctg5239□ctg6021□WAG-58B16

ctg3043□ctg5239□ctg6021□WAG-70C12  
ctg3044□ctg5241□ctg6029□WAG-21C21  
ctg3044□ctg5241□ctg6029□WAG-50F11  
ctg3045□ctg5242□ctg6030□WAG-49I8  
ctg3045□ctg5242□ctg6030□WAG-59C14  
ctg3046□ctg5243□ctg6033□WAG-23F16  
ctg3046□ctg5243□ctg6033□WAG-40L14  
ctg3047□ctg5246□ctg6038□WAG-28J4  
ctg3047□ctg5246□ctg6038□WAG-49D17  
ctg3048□ctg5250□ctg6045□WAG-13G18  
ctg3048□ctg5250□ctg6045□WAG-102C19  
ctg3049□ctg5251□ctg6048□WAG-8F1  
ctg3049□ctg5251□ctg6048□WAG-9G8  
ctg305□□□WAG-108P20  
ctg305□ctg1291□□WAG-9J10  
ctg305□ctg1291□ctg1145□WAG-26O7  
ctg305□ctg1291□ctg1145□WAG-37D9  
ctg305□ctg1291□ctg1145□WAG-37D11  
ctg305□ctg1291□ctg1145□WAG-56N18  
ctg305□ctg1291□ctg1145□WAG-81C16  
ctg305□ctg1291□ctg1145□WAG-96O7  
ctg305□ctg1291□ctg1145□WAG-99E21  
ctg305□ctg1291□ctg1145□WAG-99F11  
ctg305□ctg3602□ctg3779□WAG-23C17  
ctg305□ctg3602□ctg3779□WAG-89F8  
ctg305□ctg3602□ctg3779□WAG-104G15  
ctg3050□□□WAG-2K2  
ctg3050□□□WAG-22F6  
ctg3050□□□WAG-33G4  
ctg3050□□□WAG-60I24  
ctg3051□ctg5256□ctg6060□WAG-33N7  
ctg3051□ctg5256□ctg6060□WAG-48K10  
ctg3052□□□WAG-35C23  
ctg3052□□□WAG-47E9  
ctg3052□ctg6570□□WAG-55G18  
ctg3052□ctg6570□□WAG-125K22  
ctg3053□□□WAG-75L6  
ctg3053□□□WAG-78M18  
ctg3053□□□WAG-108A16  
ctg3054□□□WAG-8K6  
ctg3054□□□WAG-25G9  
ctg3054□□□WAG-122L20  
ctg3055□ctg5259□ctg6065□WAG-117P22  
ctg3055□ctg5259□ctg6065□WAG-123P3  
ctg3056□ctg5263□ctg6072□WAG-81J24  
ctg3056□ctg5263□ctg6072□WAG-104B7  
ctg3057□ctg5265□ctg6080□WAG-54F2  
ctg3057□ctg5265□ctg6080□WAG-56B2  
ctg3058□ctg5268□ctg6084□WAG-45F10  
ctg3058□ctg5268□ctg6084□WAG-59L1  
ctg3059□ctg5269□□WAG-41K16  
ctg3059□ctg5269□ctg6087□WAG-34A4  
ctg3059□ctg5269□ctg6087□WAG-41K17  
ctg306□□□WAG-39H18  
ctg306□ctg784□□WAG-32I5  
ctg306□ctg784□□WAG-37P12



ctg306□ctg784□□WAG-46I24  
ctg306□ctg784□ctg1369□WAG-8K1  
ctg306□ctg784□ctg1369□WAG-49D22  
ctg306□ctg784□ctg1369□WAG-55L11  
ctg306□ctg784□ctg1369□WAG-86D22  
ctg306□ctg784□ctg1369□WAG-92D9  
ctg306□ctg784□ctg1369□WAG-93J5  
ctg306□ctg784□ctg1369□WAG-104C4  
ctg306□ctg784□ctg1369□WAG-110J19  
ctg306□ctg784□ctg1369□WAG-125K5  
ctg306□ctg784□ctg1369□WAG-125N13  
ctg306□ctg784□ctg5091□WAG-114K16  
ctg306□ctg784□ctg5091□WAG-130C19  
ctg3060□ctg5270□ctg6088□WAG-28O13  
ctg3060□ctg5270□ctg6088□WAG-102O10  
ctg3061□ctg5272□ctg6093□WAG-16A2  
ctg3061□ctg5272□ctg6093□WAG-21I24  
ctg3062□ctg5273□ctg6094□WAG-13N11  
ctg3062□ctg5273□ctg6094□WAG-42P3  
ctg3063□ctg5274□ctg6099□WAG-60N17  
ctg3063□ctg5274□ctg6099□WAG-125M7  
ctg3064□ctg5275□ctg6101□WAG-22G4  
ctg3064□ctg5275□ctg6101□WAG-113E20  
ctg3065□ctg5280□ctg6111□WAG-45P5  
ctg3065□ctg5280□ctg6111□WAG-60N18  
ctg3066□ctg5282□ctg6114□WAG-36D4  
ctg3066□ctg5282□ctg6114□WAG-116K6  
ctg3067□□□WAG-109K18  
ctg3067□□□WAG-123L12  
ctg3067□□□WAG-129I19  
ctg3068□□□WAG-37E15  
ctg3068□□□WAG-73B6  
ctg3068□□□WAG-85G7  
ctg3069□□□WAG-14J13  
ctg3069□□□WAG-45E15  
ctg3069□□□WAG-102I1  
ctg307□ctg1037□□WAG-9N23  
ctg307□ctg1037□ctg1516□WAG-45A18  
ctg307□ctg1037□ctg1516□WAG-64P23  
ctg307□ctg1037□ctg1516□WAG-77L23  
ctg307□ctg1037□ctg1516□WAG-101K11  
ctg307□ctg1037□ctg1516□WAG-103A5  
ctg307□ctg1037□ctg1516□WAG-112A8  
ctg307□ctg1037□ctg1516□WAG-112B8  
ctg307□ctg1037□ctg1516□WAG-120F8  
ctg3070□ctg5286□ctg6119□WAG-79N14  
ctg3070□ctg5286□ctg6119□WAG-121A11  
ctg3071□ctg5289□ctg6125□WAG-14K18  
ctg3071□ctg5289□ctg6125□WAG-98E13  
ctg3072□ctg5290□ctg6126□WAG-96P14  
ctg3072□ctg5290□ctg6126□WAG-103D22  
ctg3073□ctg5293□ctg6132□WAG-65F6  
ctg3073□ctg5293□ctg6132□WAG-98F16  
ctg3074□ctg5296□ctg6135□WAG-59J20  
ctg3074□ctg5296□ctg6135□WAG-59P10  
ctg3075□ctg5297□ctg6139□WAG-7L2

ctg3075□ctg5297□ctg6139□WAG-53D17  
ctg3076□□□WAG-29F10  
ctg3076□□□WAG-35D1  
ctg3076□□□WAG-57M11  
ctg3077□ctg5303□ctg6152□WAG-47P17  
ctg3077□ctg5303□ctg6152□WAG-116J7  
ctg3078□ctg5304□ctg6153□WAG-91P9  
ctg3078□ctg5304□ctg6153□WAG-113O12  
ctg3079□ctg5307□ctg6164□WAG-23A23  
ctg3079□ctg5307□ctg6164□WAG-69O6  
ctg308□ctg1004□ctg846□WAG-9F8  
ctg308□ctg1004□ctg846□WAG-65B20  
ctg308□ctg1004□ctg846□WAG-70F14  
ctg308□ctg1004□ctg846□WAG-90G7  
ctg308□ctg1004□ctg846□WAG-108C21  
ctg308□ctg1004□ctg846□WAG-112D22  
ctg308□ctg1004□ctg846□WAG-121O13  
ctg308□ctg1004□ctg846□WAG-126B15  
ctg308□ctg1004□ctg846□WAG-130G4  
ctg308□ctg1004□ctg846□WAG-130P1  
ctg3080□ctg5308□ctg6171□WAG-51L5  
ctg3080□ctg5308□ctg6171□WAG-65E6  
ctg3081□ctg5310□ctg6180□WAG-39L11  
ctg3081□ctg5310□ctg6180□WAG-122N22  
ctg3082□□□WAG-51A8  
ctg3082□□□WAG-107D6  
ctg3082□□□WAG-115J7  
ctg3083□□□WAG-31N21  
ctg3083□□□WAG-54O21  
ctg3083□□□WAG-92M3  
ctg3084□ctg5315□ctg6191□WAG-68N15  
ctg3084□ctg5315□ctg6191□WAG-95A17  
ctg3085□□□WAG-25G12  
ctg3085□□□WAG-35E7  
ctg3085□□□WAG-105D6  
ctg3086□□□WAG-11H12  
ctg3086□□□WAG-21E13  
ctg3086□□□WAG-37D4  
ctg3087□ctg5317□ctg6195□WAG-108B3  
ctg3087□ctg5317□ctg6195□WAG-130O16  
ctg3088□ctg5320□ctg6203□WAG-16M20  
ctg3088□ctg5320□ctg6203□WAG-104E2  
ctg3089□ctg5322□ctg6207□WAG-91A18  
ctg3089□ctg5322□ctg6207□WAG-106L9  
ctg309□□□WAG-29L19  
ctg309□ctg5495□ctg6593□WAG-101M23  
ctg309□ctg5495□ctg6593□WAG-122N13  
ctg309□ctg755□□WAG-3J18  
ctg309□ctg755□□WAG-37J19  
ctg309□ctg755□□WAG-50E9  
ctg309□ctg755□ctg1377□WAG-1I9  
ctg309□ctg755□ctg1377□WAG-6G17  
ctg309□ctg755□ctg1377□WAG-24H18  
ctg309□ctg755□ctg1377□WAG-42G13  
ctg309□ctg755□ctg1377□WAG-50N16  
ctg309□ctg755□ctg1377□WAG-51A10

ctg309□ctg755□ctg1377□WAG-55H1  
ctg309□ctg755□ctg1377□WAG-60P11  
ctg309□ctg755□ctg1377□WAG-67A14  
ctg309□ctg755□ctg1377□WAG-71L16  
ctg309□ctg755□ctg1377□WAG-86G11  
ctg309□ctg755□ctg1377□WAG-86K18  
ctg309□ctg755□ctg1377□WAG-89K9  
ctg309□ctg755□ctg1377□WAG-90I9  
ctg309□ctg755□ctg1377□WAG-104O11  
ctg309□ctg755□ctg1377□WAG-106G24  
ctg309□ctg755□ctg1377□WAG-114P17  
ctg3090□ctg5330□ctg6225□WAG-14F17  
ctg3090□ctg5330□ctg6225□WAG-123L11  
ctg3091□□□WAG-10P9  
ctg3091□□□WAG-86P19  
ctg3091□□□WAG-101M20  
ctg3092□□□WAG-9A21  
ctg3092□□□WAG-65O7  
ctg3092□□□WAG-88G17  
ctg3093□□□WAG-13G24  
ctg3093□□□WAG-40N23  
ctg3093□□□WAG-114I7  
ctg3094□□□WAG-46D22  
ctg3094□□□WAG-53M8  
ctg3094□□□WAG-128G1  
ctg3095□ctg5333□ctg6230□WAG-84P24  
ctg3095□ctg5333□ctg6230□WAG-108L22  
ctg3096□ctg5336□ctg6243□WAG-92K4  
ctg3096□ctg5336□ctg6243□WAG-118J21  
ctg3097□ctg5341□ctg6262□WAG-82O6  
ctg3097□ctg5341□ctg6262□WAG-88P9  
ctg3098□ctg5355□ctg6289□WAG-18B10  
ctg3098□ctg5355□ctg6289□WAG-59E23  
ctg3099□□□WAG-3B5  
ctg3099□□□WAG-46G3  
ctg3099□□□WAG-101I8  
ctg31□□□WAG-7B19  
ctg31□□□WAG-118M22  
ctg31□ctg5675□ctg6853□WAG-9O6  
ctg31□ctg5675□ctg6853□WAG-12B23  
ctg31□ctg640□□WAG-31L1  
ctg31□ctg640□ctg765□WAG-24P22  
ctg31□ctg640□ctg765□WAG-46E21  
ctg31□ctg640□ctg765□WAG-49A20  
ctg31□ctg640□ctg765□WAG-88I15  
ctg31□ctg640□ctg765□WAG-94N7  
ctg31□ctg640□ctg765□WAG-100D6  
ctg31□ctg640□ctg765□WAG-120A5  
ctg310□ctg1270□□WAG-26E20  
ctg310□ctg1270□ctg1107□WAG-56D14  
ctg310□ctg1270□ctg1107□WAG-60M14  
ctg310□ctg1270□ctg1107□WAG-68D3  
ctg310□ctg1270□ctg1107□WAG-89B18  
ctg310□ctg1270□ctg1107□WAG-101O2  
ctg310□ctg1270□ctg1107□WAG-107N7  
ctg310□ctg1270□ctg1107□WAG-124A15

ctg310□ctg4138□ctg4394□WAG-19F9  
ctg310□ctg4138□ctg4394□WAG-106H13  
ctg3100□□□WAG-6A8  
ctg3100□□□WAG-8H8  
ctg3100□□□WAG-10B24  
ctg3101□□□WAG-55I24  
ctg3101□□□WAG-73J1  
ctg3101□□□WAG-111C18  
ctg3102□□□WAG-68J17  
ctg3102□ctg6562□□WAG-34G19  
ctg3102□ctg6562□□WAG-119K24  
ctg3103□ctg5364□ctg6306□WAG-48L23  
ctg3103□ctg5364□ctg6306□WAG-102B12  
ctg3104□ctg5365□ctg6307□WAG-76N7  
ctg3104□ctg5365□ctg6307□WAG-95L7  
ctg3105□ctg5368□ctg6314□WAG-4E16  
ctg3105□ctg5368□ctg6314□WAG-85G20  
ctg3106□ctg5369□ctg6317□WAG-80G5  
ctg3106□ctg5369□ctg6317□WAG-119K9  
ctg3107□ctg5372□ctg6324□WAG-41P6  
ctg3107□ctg5372□ctg6324□WAG-68H6  
ctg3108□ctg5374□ctg6328□WAG-59K20  
ctg3108□ctg5374□ctg6328□WAG-62C2  
ctg3109□ctg5380□ctg6341□WAG-32F4  
ctg3109□ctg5380□ctg6341□WAG-130N8  
ctg311□ctg899□□WAG-14M2  
ctg311□ctg899□□WAG-30O10  
ctg311□ctg899□□WAG-100K14  
ctg311□ctg899□ctg5909□WAG-47F8  
ctg311□ctg899□ctg5909□WAG-80G7  
ctg311□ctg899□ctg6026□WAG-21F22  
ctg311□ctg899□ctg6026□WAG-59J23  
ctg311□ctg899□ctg790□WAG-3F1  
ctg311□ctg899□ctg790□WAG-5P18  
ctg311□ctg899□ctg790□WAG-9A3  
ctg311□ctg899□ctg790□WAG-20F6  
ctg311□ctg899□ctg790□WAG-26L21  
ctg311□ctg899□ctg790□WAG-48G16  
ctg311□ctg899□ctg790□WAG-74E7  
ctg311□ctg899□ctg790□WAG-103M8  
ctg311□ctg899□ctg790□WAG-112J19  
ctg311□ctg899□ctg790□WAG-123M1  
ctg3110□□□WAG-52G9  
ctg3110□□□WAG-80F23  
ctg3110□□□WAG-121N2  
ctg3111□ctg5384□□WAG-11O24  
ctg3111□ctg5384□□WAG-35L10  
ctg3112□□□WAG-16F11  
ctg3112□□□WAG-48J1  
ctg3112□□□WAG-83M18  
ctg3112□□□WAG-114F11  
ctg3113□ctg5388□ctg6358□WAG-49G20  
ctg3113□ctg5388□ctg6358□WAG-125E22  
ctg3114□ctg5389□ctg6360□WAG-3I21  
ctg3114□ctg5389□ctg6360□WAG-124H21  
ctg3115□ctg5391□ctg6366□WAG-86I20

ctg3115□ctg5391□ctg6366□WAG-113K8  
ctg3116□ctg5397□ctg6383□WAG-1N1  
ctg3116□ctg5397□ctg6383□WAG-94M16  
ctg3117□ctg5398□ctg6387□WAG-90M6  
ctg3117□ctg5398□ctg6387□WAG-125P10  
ctg3118□ctg5402□ctg6395□WAG-63M14  
ctg3118□ctg5402□ctg6395□WAG-83C7  
ctg3119□ctg5406□ctg6404□WAG-70E10  
ctg3119□ctg5406□ctg6404□WAG-89I2  
ctg312□ctg759□ctg802□WAG-20H5  
ctg312□ctg759□ctg802□WAG-60O16  
ctg312□ctg759□ctg802□WAG-89N4  
ctg312□ctg759□ctg802□WAG-94C22  
ctg312□ctg759□ctg802□WAG-97P11  
ctg312□ctg759□ctg802□WAG-99G10  
ctg3120□ctg5409□ctg6414□WAG-31K13  
ctg3120□ctg5409□ctg6414□WAG-49M24  
ctg3121□ctg5414□ctg6426□WAG-25M10  
ctg3121□ctg5414□ctg6426□WAG-120E3  
ctg3122□ctg5415□ctg6428□WAG-19A17  
ctg3122□ctg5415□ctg6428□WAG-82I19  
ctg3123□□□WAG-27J8  
ctg3123□□□WAG-88K19  
ctg3123□□□WAG-118C24  
ctg3124□ctg5418□□WAG-24P7  
ctg3124□ctg5418□□WAG-111P7  
ctg3125□ctg5419□□WAG-14A9  
ctg3125□ctg5419□□WAG-42G15  
ctg3125□ctg5419□□WAG-118P9  
ctg3126□ctg5421□ctg6438□WAG-2P22  
ctg3126□ctg5421□ctg6438□WAG-115J19  
ctg3127□ctg5424□ctg6442□WAG-101B1  
ctg3127□ctg5424□ctg6442□WAG-123I15  
ctg3128□ctg5429□ctg6452□WAG-56G18  
ctg3128□ctg5429□ctg6452□WAG-109A1  
ctg3129□ctg5432□ctg6460□WAG-24D21  
ctg3129□ctg5432□ctg6460□WAG-93B20  
ctg313□□□WAG-23E17  
ctg313□□□WAG-39G22  
ctg313□ctg4503□ctg4635□WAG-20K17  
ctg313□ctg4503□ctg4635□WAG-59B14  
ctg313□ctg795□ctg1165□WAG-16F5  
ctg313□ctg795□ctg1165□WAG-29B24  
ctg313□ctg795□ctg1165□WAG-37C24  
ctg313□ctg795□ctg1165□WAG-54B4  
ctg313□ctg795□ctg1165□WAG-70G7  
ctg313□ctg795□ctg1165□WAG-71I21  
ctg313□ctg795□ctg1165□WAG-83I18  
ctg313□ctg795□ctg1165□WAG-120G15  
ctg3130□ctg5433□ctg6467□WAG-46I19  
ctg3130□ctg5433□ctg6467□WAG-85G9  
ctg3131□ctg5434□□WAG-81N17  
ctg3131□ctg5434□ctg6469□WAG-81N16  
ctg3131□ctg5434□ctg6469□WAG-81P17  
ctg3132□ctg5438□ctg6474□WAG-35H12  
ctg3132□ctg5438□ctg6474□WAG-77I23

ctg3133□ctg5439□ctg6475□WAG-18M22  
ctg3133□ctg5439□ctg6475□WAG-76D1  
ctg3134□ctg5440□ctg6477□WAG-74C17  
ctg3134□ctg5440□ctg6477□WAG-120P13  
ctg3135□ctg5441□ctg6480□WAG-33J22  
ctg3135□ctg5441□ctg6480□WAG-71D7  
ctg3136□ctg5443□ctg6483□WAG-68F11  
ctg3136□ctg5443□ctg6483□WAG-109C14  
ctg3137□ctg5454□ctg6507□WAG-34F17  
ctg3137□ctg5454□ctg6507□WAG-54J22  
ctg3138□ctg5456□ctg6510□WAG-28K12  
ctg3138□ctg5456□ctg6510□WAG-122K17  
ctg3139□ctg5458□ctg6516□WAG-18H16  
ctg3139□ctg5458□ctg6516□WAG-84L22  
ctg314□□□WAG-7D24  
ctg314□ctg1022□ctg1177□WAG-11A24  
ctg314□ctg1022□ctg1177□WAG-67I22  
ctg314□ctg1022□ctg1177□WAG-68K12  
ctg314□ctg1022□ctg1177□WAG-80G13  
ctg314□ctg1022□ctg1177□WAG-89B20  
ctg314□ctg1022□ctg1177□WAG-119K7  
ctg314□ctg1022□ctg1177□WAG-130E19  
ctg314□ctg4485□ctg4624□WAG-9B9  
ctg314□ctg4485□ctg4624□WAG-50B4  
ctg3140□ctg5460□ctg6523□WAG-13A10  
ctg3140□ctg5460□ctg6523□WAG-94N11  
ctg3141□ctg5461□ctg6524□WAG-10I17  
ctg3141□ctg5461□ctg6524□WAG-130M3  
ctg3142□□□WAG-27G15  
ctg3142□□□WAG-36E5  
ctg3142□□□WAG-98L9  
ctg3143□□□WAG-80C13  
ctg3143□□□WAG-82O14  
ctg3143□□□WAG-111O21  
ctg3144□ctg5466□ctg6529□WAG-55E17  
ctg3144□ctg5466□ctg6529□WAG-124L5  
ctg3145□ctg5468□ctg6533□WAG-62O16  
ctg3145□ctg5468□ctg6533□WAG-114F4  
ctg3146□ctg5474□ctg6547□WAG-86J13  
ctg3146□ctg5474□ctg6547□WAG-115D22  
ctg3147□ctg5477□ctg6555□WAG-71M4  
ctg3147□ctg5477□ctg6555□WAG-121B12  
ctg3148□ctg5481□ctg6564□WAG-20F10  
ctg3148□ctg5481□ctg6564□WAG-57N16  
ctg3149□ctg5484□ctg6571□WAG-50I7  
ctg3149□ctg5484□ctg6571□WAG-52J20  
ctg315□□□WAG-91D4  
ctg315□ctg888□□WAG-60D16  
ctg315□ctg888□ctg1111□WAG-11L5  
ctg315□ctg888□ctg1111□WAG-19O9  
ctg315□ctg888□ctg1111□WAG-49J24  
ctg315□ctg888□ctg1111□WAG-52L5  
ctg315□ctg888□ctg1111□WAG-76I14  
ctg315□ctg888□ctg1111□WAG-78L18  
ctg315□ctg888□ctg1111□WAG-80M6  
ctg315□ctg888□ctg1111□WAG-123B22

ctg315□ctg888□ctg967□WAG-2G15  
ctg315□ctg888□ctg967□WAG-6A19  
ctg315□ctg888□ctg967□WAG-21D8  
ctg315□ctg888□ctg967□WAG-21N14  
ctg315□ctg888□ctg967□WAG-28K18  
ctg315□ctg888□ctg967□WAG-76E9  
ctg315□ctg888□ctg967□WAG-88O20  
ctg315□ctg888□ctg967□WAG-110O11  
ctg3150□ctg5487□ctg6577□WAG-35C5  
ctg3150□ctg5487□ctg6577□WAG-41F7  
ctg3151□ctg5489□ctg6580□WAG-31H11  
ctg3151□ctg5489□ctg6580□WAG-94O4  
ctg3152□ctg5492□ctg6585□WAG-15I10  
ctg3152□ctg5492□ctg6585□WAG-38L2  
ctg3153□□□WAG-42H12  
ctg3153□□□WAG-74G23  
ctg3153□□□WAG-123C17  
ctg3154□□□WAG-26D19  
ctg3154□□□WAG-42H19  
ctg3154□□□WAG-64I16  
ctg3155□ctg5494□ctg6589□WAG-57M5  
ctg3155□ctg5494□ctg6589□WAG-129K11  
ctg3156□ctg5500□ctg6602□WAG-12N7  
ctg3156□ctg5500□ctg6602□WAG-109O15  
ctg3157□ctg5502□ctg6604□WAG-98M9  
ctg3157□ctg5502□ctg6604□WAG-108H21  
ctg3158□ctg5504□ctg6611□WAG-68A20  
ctg3158□ctg5504□ctg6611□WAG-104M18  
ctg3159□ctg5507□ctg6616□WAG-95F11  
ctg3159□ctg5507□ctg6616□WAG-101J3  
ctg316□□□WAG-1A3  
ctg316□□□WAG-65O18  
ctg316□ctg772□□WAG-4G4  
ctg316□ctg772□□WAG-51C16  
ctg316□ctg772□ctg3459□WAG-6C4  
ctg316□ctg772□ctg3459□WAG-31J7  
ctg316□ctg772□ctg3459□WAG-94H14  
ctg316□ctg772□ctg782□WAG-10N14  
ctg316□ctg772□ctg782□WAG-14M9  
ctg316□ctg772□ctg782□WAG-41B8  
ctg316□ctg772□ctg782□WAG-61B14  
ctg316□ctg772□ctg782□WAG-95B23  
ctg316□ctg772□ctg782□WAG-95N22  
ctg316□ctg772□ctg782□WAG-96B3  
ctg3160□ctg5510□ctg6622□WAG-92D10  
ctg3160□ctg5510□ctg6622□WAG-123J18  
ctg3161□ctg5511□ctg6623□WAG-91G14  
ctg3161□ctg5511□ctg6623□WAG-118G4  
ctg3162□ctg5517□ctg6637□WAG-50L3  
ctg3162□ctg5517□ctg6637□WAG-67F3  
ctg3163□ctg5518□ctg6638□WAG-5C15  
ctg3163□ctg5518□ctg6638□WAG-65K19  
ctg3164□ctg5520□ctg6644□WAG-49J11  
ctg3164□ctg5520□ctg6644□WAG-56A21  
ctg3165□ctg5521□ctg6648□WAG-54B20  
ctg3165□ctg5521□ctg6648□WAG-61C15

ctg3166□ctg5522□ctg6649□WAG-49G19  
ctg3166□ctg5522□ctg6649□WAG-49K22  
ctg3167□ctg5525□ctg6656□WAG-31E9  
ctg3167□ctg5525□ctg6656□WAG-36K18  
ctg3168□ctg5532□ctg6664□WAG-23E20  
ctg3168□ctg5532□ctg6664□WAG-35H19  
ctg3169□□□WAG-11K21  
ctg3169□□□WAG-33H24  
ctg3169□□□WAG-101H17  
ctg317□□□WAG-37I13  
ctg317□□□WAG-53G18  
ctg317□ctg1259□ctg1452□WAG-23E4  
ctg317□ctg1259□ctg1452□WAG-37L10  
ctg317□ctg1259□ctg1452□WAG-114F10  
ctg317□ctg1259□ctg1452□WAG-117H12  
ctg317□ctg1259□ctg1479□WAG-6F17  
ctg317□ctg1259□ctg1479□WAG-42C7  
ctg317□ctg1259□ctg1479□WAG-53D21  
ctg317□ctg1259□ctg1479□WAG-63P4  
ctg317□ctg1259□ctg1479□WAG-72P21  
ctg317□ctg1259□ctg1479□WAG-121L24  
ctg317□ctg1259□ctg1479□WAG-125F6  
ctg317□ctg4193□□WAG-19N23  
ctg317□ctg4193□ctg6042□WAG-19P10  
ctg317□ctg4193□ctg6042□WAG-96H5  
ctg317□ctg4649□ctg4807□WAG-48M17  
ctg317□ctg4649□ctg4807□WAG-50L24  
ctg317□ctg5645□□WAG-29F23  
ctg317□ctg5645□□WAG-66L8  
ctg3170□□□WAG-16B15  
ctg3170□□□WAG-42F9  
ctg3170□□□WAG-85H20  
ctg3171□□□WAG-35I17  
ctg3171□□□WAG-58D7  
ctg3171□□□WAG-82F19  
ctg3172□□□WAG-5H23  
ctg3172□□□WAG-6K1  
ctg3172□□□WAG-61L12  
ctg3173□ctg5536□□WAG-65F12  
ctg3173□ctg5536□□WAG-124G18  
ctg3174□ctg5544□ctg6677□WAG-57K1  
ctg3174□ctg5544□ctg6677□WAG-112B19  
ctg3175□ctg5551□ctg6690□WAG-87N12  
ctg3175□ctg5551□ctg6690□WAG-130P4  
ctg3176□ctg5552□ctg6691□WAG-47L2  
ctg3176□ctg5552□ctg6691□WAG-86K16  
ctg3177□ctg5553□ctg6693□WAG-86D2  
ctg3177□ctg5553□ctg6693□WAG-93B18  
ctg3178□ctg5554□ctg6694□WAG-64F23  
ctg3178□ctg5554□ctg6694□WAG-85O22  
ctg3179□ctg5561□ctg6711□WAG-29K21  
ctg3179□ctg5561□ctg6711□WAG-130F2  
ctg318□ctg3667□□WAG-21K10  
ctg318□ctg3667□□WAG-128J16  
ctg318□ctg3667□ctg4882□WAG-36I1  
ctg318□ctg3667□ctg4882□WAG-36P9



ctg318□ctg781□□WAG-10C22  
ctg318□ctg781□□WAG-96E13  
ctg318□ctg781□ctg634□WAG-7H17  
ctg318□ctg781□ctg634□WAG-55A7  
ctg318□ctg781□ctg634□WAG-71B11  
ctg318□ctg781□ctg634□WAG-73C9  
ctg318□ctg781□ctg634□WAG-81F4  
ctg318□ctg781□ctg634□WAG-92L6  
ctg3180□ctg5562□□WAG-5L24  
ctg3180□ctg5562□ctg6713□WAG-25M12  
ctg3180□ctg5562□ctg6713□WAG-77H1  
ctg3181□ctg5568□□WAG-8D12  
ctg3181□ctg5568□□WAG-105M3  
ctg3182□ctg5573□□WAG-70N7  
ctg3182□ctg5573□□WAG-87D16  
ctg3183□ctg5581□ctg6724□WAG-7E22  
ctg3183□ctg5581□ctg6724□WAG-127H19  
ctg3184□ctg5582□ctg6725□WAG-72J3  
ctg3184□ctg5582□ctg6725□WAG-125A12  
ctg3185□ctg5586□ctg6735□WAG-75I6  
ctg3185□ctg5586□ctg6735□WAG-97L11  
ctg3186□ctg5589□ctg6748□WAG-60O23  
ctg3186□ctg5589□ctg6748□WAG-70O2  
ctg3187□ctg5590□ctg6749□WAG-70I18  
ctg3187□ctg5590□ctg6749□WAG-113H4  
ctg3188□ctg5594□ctg6754□WAG-18C1  
ctg3188□ctg5594□ctg6754□WAG-52I9  
ctg3189□ctg5596□ctg6761□WAG-44J18  
ctg3189□ctg5596□ctg6761□WAG-84O1  
ctg319□□□WAG-43M18  
ctg319□□□WAG-77K4  
ctg319□□□WAG-108I7  
ctg319□ctg1437□ctg1287□WAG-22A12  
ctg319□ctg1437□ctg1287□WAG-63A17  
ctg319□ctg1437□ctg1287□WAG-92G6  
ctg319□ctg1437□ctg1287□WAG-93P18  
ctg319□ctg1437□ctg1287□WAG-107I19  
ctg319□ctg1437□ctg1287□WAG-128K20  
ctg319□ctg3233□□WAG-19N5  
ctg319□ctg3233□□WAG-100J8  
ctg319□ctg3233□ctg6412□WAG-32K3  
ctg319□ctg3233□ctg6412□WAG-52F18  
ctg319□ctg5951□□WAG-66A17  
ctg319□ctg5951□□WAG-130G15  
ctg3190□ctg5598□ctg6766□WAG-40C18  
ctg3190□ctg5598□ctg6766□WAG-110M17  
ctg3191□ctg5599□ctg6768□WAG-35J23  
ctg3191□ctg5599□ctg6768□WAG-99F5  
ctg3192□ctg5601□ctg6774□WAG-23N13  
ctg3192□ctg5601□ctg6774□WAG-122J5  
ctg3193□□□WAG-43A21  
ctg3193□□□WAG-66P24  
ctg3193□□□WAG-73F4  
ctg3194□□□WAG-11M12  
ctg3194□□□WAG-18H21  
ctg3194□□□WAG-78H24

ctg3195□ctg5604□ctg6778□WAG-40L18  
ctg3195□ctg5604□ctg6778□WAG-125E21  
ctg3196□ctg5605□□WAG-81G6  
ctg3196□ctg5605□□WAG-119E18  
ctg3197□ctg5606□□WAG-44I6  
ctg3197□ctg5606□□WAG-108I2  
ctg3198□ctg5607□□WAG-33A10  
ctg3198□ctg5607□□WAG-106G6  
ctg3199□ctg5609□□WAG-82P1  
ctg3199□ctg5609□□WAG-95M22  
ctg32□□□WAG-27P23  
ctg32□□□WAG-58B21  
ctg32□ctg133□□WAG-16N6  
ctg32□ctg133□□WAG-40A10  
ctg32□ctg133□ctg306□WAG-31B7  
ctg32□ctg133□ctg306□WAG-44C4  
ctg32□ctg133□ctg306□WAG-52K17  
ctg32□ctg133□ctg306□WAG-55D3  
ctg32□ctg133□ctg306□WAG-56P15  
ctg32□ctg133□ctg306□WAG-67N18  
ctg32□ctg133□ctg306□WAG-73M17  
ctg32□ctg133□ctg306□WAG-75F10  
ctg32□ctg133□ctg306□WAG-77N13  
ctg32□ctg133□ctg306□WAG-109L3  
ctg32□ctg133□ctg306□WAG-111I2  
ctg32□ctg133□ctg306□WAG-117C6  
ctg32□ctg133□ctg306□WAG-120M13  
ctg32□ctg133□ctg306□WAG-125A4  
ctg32□ctg133□ctg306□WAG-127M22  
ctg32□ctg2290□□WAG-87N3  
ctg32□ctg2290□□WAG-103E24  
ctg32□ctg2290□□WAG-119D5  
ctg32□ctg2290□ctg2839□WAG-13D16  
ctg32□ctg2290□ctg2839□WAG-64M18  
ctg32□ctg2290□ctg2839□WAG-70M15  
ctg320□□□WAG-31O17  
ctg320□ctg1916□□WAG-33B17  
ctg320□ctg1916□ctg2283□WAG-12B13  
ctg320□ctg1916□ctg2283□WAG-23K6  
ctg320□ctg1916□ctg2283□WAG-58D12  
ctg320□ctg926□□WAG-27L15  
ctg320□ctg926□ctg1330□WAG-10G1  
ctg320□ctg926□ctg1330□WAG-14H18  
ctg320□ctg926□ctg1330□WAG-46H6  
ctg320□ctg926□ctg1330□WAG-46M23  
ctg320□ctg926□ctg1330□WAG-81E5  
ctg3200□ctg5610□□WAG-64K2  
ctg3200□ctg5610□□WAG-90A5  
ctg3201□ctg5623□ctg6791□WAG-102H16  
ctg3201□ctg5623□ctg6791□WAG-129L9  
ctg3202□ctg5624□ctg6792□WAG-94A19  
ctg3202□ctg5624□ctg6792□WAG-119C11  
ctg3203□ctg5625□ctg6794□WAG-21F3  
ctg3203□ctg5625□ctg6794□WAG-93B22  
ctg3204□ctg5626□ctg6800□WAG-30A1  
ctg3204□ctg5626□ctg6800□WAG-63E5

ctg3205□ctg5629□ctg6804□WAG-36B22  
ctg3205□ctg5629□ctg6804□WAG-110L12  
ctg3206□ctg5631□ctg6808□WAG-17A17  
ctg3206□ctg5631□ctg6808□WAG-22K12  
ctg3207□ctg5636□□WAG-5N13  
ctg3207□ctg5636□□WAG-111I14  
ctg3208□ctg5640□ctg6812□WAG-12P15  
ctg3208□ctg5640□ctg6812□WAG-93E16  
ctg3209□ctg5647□□WAG-64O2  
ctg3209□ctg5647□□WAG-66A16  
ctg321□□□WAG-59P5  
ctg321□□□WAG-87B9  
ctg321□□□WAG-104J14  
ctg321□ctg2116□□WAG-80O2  
ctg321□ctg2116□ctg1983□WAG-58G18  
ctg321□ctg2116□ctg1983□WAG-64M16  
ctg321□ctg2116□ctg1983□WAG-113G1  
ctg321□ctg2116□ctg1983□WAG-117B11  
ctg321□ctg793□□WAG-82A10  
ctg321□ctg793□ctg1092□WAG-24O2  
ctg321□ctg793□ctg1092□WAG-34C17  
ctg321□ctg793□ctg1092□WAG-41G23  
ctg321□ctg793□ctg1092□WAG-50H14  
ctg321□ctg793□ctg1092□WAG-97G18  
ctg321□ctg793□ctg3174□WAG-17P24  
ctg321□ctg793□ctg3174□WAG-42P17  
ctg321□ctg793□ctg3174□WAG-112C21  
ctg3210□ctg5655□ctg6819□WAG-98E6  
ctg3210□ctg5655□ctg6819□WAG-127I13  
ctg3211□ctg5660□ctg6830□WAG-50I18  
ctg3211□ctg5660□ctg6830□WAG-90I3  
ctg3212□ctg5663□ctg6835□WAG-29M5  
ctg3212□ctg5663□ctg6835□WAG-81D3  
ctg3213□ctg5664□□WAG-3C21  
ctg3213□ctg5664□ctg6836□WAG-3E24  
ctg3213□ctg5664□ctg6836□WAG-80P23  
ctg3214□ctg5665□ctg6837□WAG-31C12  
ctg3214□ctg5665□ctg6837□WAG-77N1  
ctg3215□ctg5667□ctg6839□WAG-23F10  
ctg3215□ctg5667□ctg6839□WAG-72E3  
ctg3216□ctg5668□ctg6840□WAG-30A17  
ctg3216□ctg5668□ctg6840□WAG-61A9  
ctg3217□ctg5669□ctg6843□WAG-52B18  
ctg3217□ctg5669□ctg6843□WAG-100F8  
ctg3218□ctg5672□ctg6850□WAG-21C23  
ctg3218□ctg5672□ctg6850□WAG-82E3  
ctg3219□ctg5682□□WAG-111N21  
ctg3219□ctg5682□□WAG-114D7  
ctg322□ctg4063□□WAG-78D18  
ctg322□ctg4063□ctg5933□WAG-37A20  
ctg322□ctg4063□ctg5933□WAG-127E2  
ctg322□ctg914□□WAG-34N2  
ctg322□ctg914□ctg757□WAG-12C12  
ctg322□ctg914□ctg757□WAG-53D22  
ctg322□ctg914□ctg757□WAG-57L8  
ctg322□ctg914□ctg757□WAG-66O22

ctg322□ctg914□ctg757□WAG-125I13  
ctg3220□ctg5683□□WAG-96C12  
ctg3220□ctg5683□□WAG-111M13  
ctg3221□ctg5687□□WAG-94L5  
ctg3221□ctg5687□□WAG-130M10  
ctg3222□ctg5689□□WAG-90I22  
ctg3222□ctg5689□□WAG-98H17  
ctg3223□ctg5692□□WAG-79L19  
ctg3223□ctg5692□□WAG-104K23  
ctg3224□ctg5698□□WAG-28L8  
ctg3224□ctg5698□□WAG-61B2  
ctg3225□ctg5701□□WAG-41M8  
ctg3225□ctg5701□□WAG-60N1  
ctg3226□ctg5703□□WAG-34M13  
ctg3226□ctg5703□□WAG-113A24  
ctg3227□ctg5710□ctg6857□WAG-71E20  
ctg3227□ctg5710□ctg6857□WAG-106F3  
ctg3228□□□WAG-34E2  
ctg3228□□□WAG-94L13  
ctg3228□□□WAG-109J11  
ctg3229□ctg5719□□WAG-21L19  
ctg3229□ctg5719□□WAG-125B15  
ctg323□□□WAG-41M3  
ctg323□□□WAG-44E13  
ctg323□□□WAG-108P2  
ctg323□ctg935□□WAG-93F10  
ctg323□ctg935□ctg1014□WAG-10C8  
ctg323□ctg935□ctg1014□WAG-80F2  
ctg323□ctg935□ctg1014□WAG-96E8  
ctg323□ctg935□ctg1014□WAG-102L16  
ctg323□ctg935□ctg1014□WAG-116M22  
ctg323□ctg935□ctg3019□WAG-58E2  
ctg323□ctg935□ctg3019□WAG-67J8  
ctg323□ctg935□ctg3019□WAG-77G13  
ctg323□ctg935□ctg3019□WAG-129F1  
ctg3230□ctg5723□□WAG-85G23  
ctg3230□ctg5723□□WAG-117I15  
ctg3231□ctg5727□ctg6877□WAG-44C18  
ctg3231□ctg5727□ctg6877□WAG-72I10  
ctg3232□ctg5734□□WAG-15O7  
ctg3232□ctg5734□□WAG-59H8  
ctg3233□ctg5739□□WAG-34L9  
ctg3233□ctg5739□□WAG-44A16  
ctg3234□ctg5740□□WAG-33P24  
ctg3234□ctg5740□□WAG-37D3  
ctg3235□ctg5742□□WAG-26C5  
ctg3235□ctg5742□□WAG-118J8  
ctg3236□ctg5744□ctg6888□WAG-20P4  
ctg3236□ctg5744□ctg6888□WAG-80L7  
ctg3237□ctg5751□□WAG-55N5  
ctg3237□ctg5751□ctg6898□WAG-90P11  
ctg3237□ctg5751□ctg6898□WAG-91J22  
ctg3238□□□WAG-7C24  
ctg3238□□□WAG-77K8  
ctg3238□□□WAG-79G17  
ctg3239□ctg5753□□WAG-18H15

ctg3239□ctg5753□□WAG-123E13  
ctg324□□□WAG-85F3  
ctg324□ctg898□□WAG-37D17  
ctg324□ctg898□ctg859□WAG-42E8  
ctg324□ctg898□ctg859□WAG-61E14  
ctg324□ctg898□ctg859□WAG-68J18  
ctg324□ctg898□ctg859□WAG-74J17  
ctg324□ctg898□ctg859□WAG-96A5  
ctg324□ctg898□ctg859□WAG-110G24  
ctg324□ctg898□ctg859□WAG-116I20  
ctg3240□ctg5757□□WAG-4E15  
ctg3240□ctg5757□□WAG-102L17  
ctg3241□ctg5759□□WAG-16K19  
ctg3241□ctg5759□□WAG-97O14  
ctg3242□ctg5760□□WAG-7A2  
ctg3242□ctg5760□□WAG-94O22  
ctg3243□ctg5765□□WAG-73H17  
ctg3243□ctg5765□□WAG-77F14  
ctg3244□ctg5767□□WAG-70N18  
ctg3244□ctg5767□□WAG-84H7  
ctg3245□ctg5768□□WAG-49G13  
ctg3245□ctg5768□□WAG-68H22  
ctg3246□ctg5772□□WAG-53O1  
ctg3246□ctg5772□□WAG-87F7  
ctg3247□ctg5773□□WAG-52K6  
ctg3247□ctg5773□□WAG-106J8  
ctg3248□ctg5775□□WAG-5E8  
ctg3248□ctg5775□□WAG-45O9  
ctg3249□ctg5778□□WAG-24H11  
ctg3249□ctg5778□□WAG-98E22  
ctg325□□□WAG-20H14  
ctg325□ctg1439□□WAG-105C18  
ctg325□ctg1439□ctg1937□WAG-5J16  
ctg325□ctg1439□ctg1937□WAG-25E15  
ctg325□ctg1439□ctg1937□WAG-32B23  
ctg325□ctg1439□ctg1937□WAG-33C8  
ctg325□ctg1439□ctg1937□WAG-34M10  
ctg325□ctg1439□ctg1937□WAG-92P23  
ctg325□ctg1439□ctg1937□WAG-94A10  
ctg325□ctg1439□ctg1937□WAG-96A9  
ctg325□ctg1439□ctg1937□WAG-105K15  
ctg325□ctg1439□ctg1937□WAG-117A15  
ctg325□ctg1439□ctg1937□WAG-119G4  
ctg325□ctg1439□ctg1937□WAG-119P18  
ctg3250□ctg5780□□WAG-10F18  
ctg3250□ctg5780□□WAG-127C5  
ctg3251□ctg5790□□WAG-45A10  
ctg3251□ctg5790□□WAG-116E17  
ctg3252□ctg5791□□WAG-3H20  
ctg3252□ctg5791□□WAG-115P2  
ctg3253□ctg5796□□WAG-94D18  
ctg3253□ctg5796□□WAG-104B12  
ctg3254□ctg5801□□WAG-100I9  
ctg3254□ctg5801□□WAG-101M21  
ctg3255□ctg5802□□WAG-61I2  
ctg3255□ctg5802□□WAG-95D7

ctg3256□ctg5804□□WAG-40D11  
ctg3256□ctg5804□□WAG-89K6  
ctg3257□ctg5808□□WAG-48D23  
ctg3257□ctg5808□□WAG-77B16  
ctg3258□ctg5813□□WAG-66O16  
ctg3258□ctg5813□□WAG-71P1  
ctg3259□ctg5816□□WAG-60N7  
ctg3259□ctg5816□□WAG-63E6  
ctg326□□□WAG-114O22  
ctg326□ctg948□ctg803□WAG-56C20  
ctg326□ctg948□ctg803□WAG-90P2  
ctg326□ctg948□ctg803□WAG-114P2  
ctg326□ctg948□ctg803□WAG-117E20  
ctg3260□ctg5818□□WAG-55O15  
ctg3260□ctg5818□□WAG-98A19  
ctg3261□ctg5824□□WAG-24J2  
ctg3261□ctg5824□□WAG-77G23  
ctg3262□ctg5825□□WAG-24I17  
ctg3262□ctg5825□□WAG-84G12  
ctg3263□ctg5831□□WAG-9M15  
ctg3263□ctg5831□□WAG-45D21  
ctg3264□ctg5834□ctg6912□WAG-61L13  
ctg3264□ctg5834□ctg6912□WAG-76M24  
ctg3265□ctg5840□ctg6916□WAG-37L13  
ctg3265□ctg5840□ctg6916□WAG-127D13  
ctg3266□ctg5842□ctg6918□WAG-19B13  
ctg3266□ctg5842□ctg6918□WAG-122G20  
ctg3267□ctg5843□□WAG-41M5  
ctg3267□ctg5843□□WAG-120H2  
ctg3268□ctg5846□□WAG-1O4  
ctg3268□ctg5846□□WAG-108M7  
ctg3269□ctg5850□ctg6924□WAG-36F1  
ctg3269□ctg5850□ctg6924□WAG-96C7  
ctg327□ctg3295□□WAG-110A3  
ctg327□ctg3295□ctg3345□WAG-94J7  
ctg327□ctg3295□ctg3345□WAG-98N17  
ctg327□ctg3295□ctg3345□WAG-123L24  
ctg327□ctg817□□WAG-24B21  
ctg327□ctg817□ctg1051□WAG-46K13  
ctg327□ctg817□ctg1051□WAG-73H6  
ctg327□ctg817□ctg1051□WAG-75J16  
ctg327□ctg817□ctg1051□WAG-77H14  
ctg327□ctg817□ctg1051□WAG-98M2  
ctg3270□ctg5852□□WAG-36H5  
ctg3270□ctg5852□□WAG-89E4  
ctg3271□ctg5854□□WAG-9N15  
ctg3271□ctg5854□□WAG-86C20  
ctg3272□ctg5858□□WAG-35F22  
ctg3272□ctg5858□□WAG-73J8  
ctg3273□ctg5861□□WAG-70G5  
ctg3273□ctg5861□□WAG-128J4  
ctg3274□ctg5862□□WAG-13D6  
ctg3274□ctg5862□□WAG-63N11  
ctg3275□ctg5870□□WAG-26G9  
ctg3275□ctg5870□□WAG-44H22  
ctg3276□ctg5872□□WAG-38K5

ctg3276□ctg5872□□WAG-128B9  
ctg3277□ctg5873□ctg6939□WAG-35K22  
ctg3277□ctg5873□ctg6939□WAG-129J22  
ctg3278□ctg5876□□WAG-25K19  
ctg3278□ctg5876□□WAG-40J22  
ctg3279□ctg5877□□WAG-23H9  
ctg3279□ctg5877□□WAG-24J6  
ctg328□□□WAG-3K18  
ctg328□□□WAG-68B19  
ctg328□ctg819□ctg1471□WAG-14D21  
ctg328□ctg819□ctg1471□WAG-52I17  
ctg328□ctg819□ctg1471□WAG-61P11  
ctg328□ctg819□ctg1471□WAG-71E22  
ctg328□ctg819□ctg1471□WAG-85A16  
ctg328□ctg819□ctg1471□WAG-101P4  
ctg328□ctg819□ctg1471□WAG-105L17  
ctg328□ctg819□ctg1471□WAG-117F13  
ctg328□ctg819□ctg1471□WAG-121C14  
ctg3280□ctg5880□□WAG-11K15  
ctg3280□ctg5880□□WAG-11N13  
ctg3281□ctg5881□ctg6947□WAG-9A11  
ctg3281□ctg5881□ctg6947□WAG-107C7  
ctg3282□ctg5882□□WAG-94E5  
ctg3282□ctg5882□□WAG-119O17  
ctg3283□ctg5887□□WAG-27J4  
ctg3283□ctg5887□□WAG-129N6  
ctg3284□ctg5893□□WAG-99P13  
ctg3284□ctg5893□□WAG-114I4  
ctg3285□ctg5896□□WAG-33K15  
ctg3285□ctg5896□□WAG-101H13  
ctg3286□ctg5897□□WAG-75J15  
ctg3286□ctg5897□□WAG-100J3  
ctg3287□ctg5901□□WAG-4K3  
ctg3287□ctg5901□□WAG-92G22  
ctg3288□□□WAG-58G16  
ctg3288□ctg5903□□WAG-88A15  
ctg3288□ctg5903□□WAG-116D13  
ctg3289□ctg5906□□WAG-66K3  
ctg3289□ctg5906□□WAG-83A7  
ctg329□ctg967□□WAG-5F13  
ctg329□ctg967□□WAG-22J13  
ctg329□ctg967□□WAG-53G24  
ctg329□ctg967□□WAG-69B20  
ctg329□ctg967□ctg1103□WAG-11O23  
ctg329□ctg967□ctg1103□WAG-33M22  
ctg329□ctg967□ctg1103□WAG-49B1  
ctg329□ctg967□ctg1103□WAG-88A19  
ctg329□ctg967□ctg1103□WAG-120B6  
ctg3290□ctg5907□□WAG-69I10  
ctg3290□ctg5907□□WAG-78G20  
ctg3291□ctg5908□□WAG-76F6  
ctg3291□ctg5908□□WAG-118N24  
ctg3292□ctg5909□□WAG-48E5  
ctg3292□ctg5909□□WAG-76B19  
ctg3293□ctg5913□□WAG-38M10  
ctg3293□ctg5913□□WAG-69G6

ctg3294□ctg5916□□WAG-51K1  
ctg3294□ctg5916□□WAG-66D3  
ctg3295□ctg5920□□WAG-14H12  
ctg3295□ctg5920□□WAG-57B9  
ctg3296□ctg5922□□WAG-14E10  
ctg3296□ctg5922□□WAG-46B6  
ctg3297□ctg5925□□WAG-35N18  
ctg3297□ctg5925□□WAG-37K14  
ctg3298□ctg5931□□WAG-18B12  
ctg3298□ctg5931□□WAG-68E20  
ctg3299□ctg5932□□WAG-1O9  
ctg3299□ctg5932□□WAG-14M11  
ctg33□ctg247□□WAG-70J4  
ctg33□ctg247□□WAG-93O9  
ctg33□ctg247□ctg1924□WAG-6M20  
ctg33□ctg247□ctg1924□WAG-6N19  
ctg33□ctg247□ctg1924□WAG-43F19  
ctg33□ctg247□ctg1924□WAG-63L21  
ctg33□ctg247□ctg1924□WAG-110O13  
ctg33□ctg247□ctg328□WAG-14O11  
ctg33□ctg247□ctg328□WAG-21K4  
ctg33□ctg247□ctg328□WAG-27C1  
ctg33□ctg247□ctg328□WAG-37B20  
ctg33□ctg247□ctg328□WAG-63D9  
ctg33□ctg247□ctg328□WAG-88N9  
ctg33□ctg247□ctg328□WAG-108F21  
ctg33□ctg247□ctg328□WAG-109B20  
ctg33□ctg247□ctg328□WAG-114H3  
ctg330□□□WAG-8H24  
ctg330□ctg6502□□WAG-15P23  
ctg330□ctg6502□□WAG-26O23  
ctg330□ctg828□ctg679□WAG-7L22  
ctg330□ctg828□ctg679□WAG-17C23  
ctg330□ctg828□ctg679□WAG-40M7  
ctg330□ctg828□ctg679□WAG-91P12  
ctg330□ctg828□ctg679□WAG-103I8  
ctg330□ctg828□ctg679□WAG-120E18  
ctg3300□ctg5938□□WAG-23F14  
ctg3300□ctg5938□□WAG-107L2  
ctg3301□ctg5942□□WAG-73C13  
ctg3301□ctg5942□□WAG-79J7  
ctg3302□ctg5946□□WAG-39N11  
ctg3302□ctg5946□□WAG-70F5  
ctg3303□ctg5949□□WAG-16M2  
ctg3303□ctg5949□□WAG-120C1  
ctg3304□ctg5952□□WAG-11K8  
ctg3304□ctg5952□□WAG-130C6  
ctg3305□ctg5953□□WAG-1K14  
ctg3305□ctg5953□□WAG-128E17  
ctg3306□ctg5956□□WAG-53P2  
ctg3306□ctg5956□□WAG-125B22  
ctg3307□ctg5957□□WAG-37A21  
ctg3307□ctg5957□□WAG-124B19  
ctg3308□ctg5962□□WAG-65A18  
ctg3308□ctg5962□□WAG-109M22  
ctg3309□ctg5965□□WAG-27H17



ctg3309□ctg5965□□WAG-104H21  
ctg331□□□WAG-46D19  
ctg331□□□WAG-66M3  
ctg331□ctg1181□□WAG-14C20  
ctg331□ctg1181□ctg1026□WAG-36G8  
ctg331□ctg1181□ctg1026□WAG-64B7  
ctg331□ctg1181□ctg1026□WAG-67I20  
ctg331□ctg1181□ctg1026□WAG-68O22  
ctg331□ctg1181□ctg1026□WAG-87J11  
ctg331□ctg1181□ctg1026□WAG-108B23  
ctg331□ctg4087□□WAG-75D2  
ctg331□ctg4087□ctg6157□WAG-93C19  
ctg331□ctg4087□ctg6157□WAG-97F7  
ctg331□ctg5141□ctg5787□WAG-65B8  
ctg331□ctg5141□ctg5787□WAG-112I8  
ctg3310□ctg5966□□WAG-102N19  
ctg3310□ctg5966□□WAG-103D19  
ctg3311□ctg5967□□WAG-27L14  
ctg3311□ctg5967□□WAG-100O20  
ctg3312□ctg5969□□WAG-22C13  
ctg3312□ctg5969□□WAG-92B14  
ctg3313□ctg5972□□WAG-30J8  
ctg3313□ctg5972□□WAG-81I3  
ctg3314□ctg5975□□WAG-68P11  
ctg3314□ctg5975□□WAG-85M13  
ctg3315□ctg5976□□WAG-68E5  
ctg3315□ctg5976□□WAG-84P17  
ctg3316□ctg5978□□WAG-59M2  
ctg3316□ctg5978□□WAG-68D10  
ctg3317□ctg5981□□WAG-6C20  
ctg3317□ctg5981□□WAG-52C4  
ctg3318□ctg5984□□WAG-41A9  
ctg3318□ctg5984□□WAG-65B2  
ctg3319□ctg5986□□WAG-40J10  
ctg3319□ctg5986□□WAG-128F11  
ctg332□ctg981□□WAG-24P24  
ctg332□ctg981□ctg4688□WAG-5J13  
ctg332□ctg981□ctg4688□WAG-42M3  
ctg332□ctg981□ctg5897□WAG-91F16  
ctg332□ctg981□ctg5897□WAG-101P7  
ctg332□ctg981□ctg825□WAG-12I16  
ctg332□ctg981□ctg825□WAG-42H13  
ctg332□ctg981□ctg825□WAG-53A21  
ctg332□ctg981□ctg825□WAG-74E6  
ctg332□ctg981□ctg825□WAG-75G7  
ctg332□ctg981□ctg825□WAG-99D3  
ctg3320□ctg5990□□WAG-29K23  
ctg3320□ctg5990□□WAG-92N19  
ctg3321□ctg5992□□WAG-21P16  
ctg3321□ctg5992□□WAG-75A8  
ctg3322□ctg5995□□WAG-3K11  
ctg3322□ctg5995□□WAG-70P1  
ctg3323□ctg5996□ctg6959□WAG-52P22  
ctg3323□ctg5996□ctg6959□WAG-65C6  
ctg3324□ctg6008□□WAG-26G22  
ctg3324□ctg6008□□WAG-124C23

ctg3325□ctg6012□□WAG-19F1  
ctg3325□ctg6012□□WAG-117L23  
ctg3326□ctg6013□□WAG-15O18  
ctg3326□ctg6013□□WAG-47O20  
ctg3327□ctg6019□□WAG-12A22  
ctg3327□ctg6019□□WAG-123L4  
ctg3328□ctg6021□□WAG-37B13  
ctg3328□ctg6021□□WAG-119A18  
ctg3329□ctg6022□□WAG-36N21  
ctg3329□ctg6022□□WAG-118E6  
ctg333□□□WAG-24P13  
ctg333□ctg1405□ctg1971□WAG-9K2  
ctg333□ctg1405□ctg1971□WAG-19B22  
ctg333□ctg1405□ctg1971□WAG-31B17  
ctg333□ctg1405□ctg1971□WAG-33F10  
ctg333□ctg1405□ctg1971□WAG-49H1  
ctg333□ctg1405□ctg1971□WAG-59M16  
ctg333□ctg1405□ctg1971□WAG-63A14  
ctg333□ctg1405□ctg1971□WAG-90B24  
ctg333□ctg1405□ctg1971□WAG-107E7  
ctg333□ctg1405□ctg1971□WAG-125I10  
ctg3330□ctg6023□□WAG-51D23  
ctg3330□ctg6023□□WAG-115E12  
ctg3331□ctg6024□□WAG-3M22  
ctg3331□ctg6024□□WAG-112P22  
ctg3332□ctg6025□□WAG-78A2  
ctg3332□ctg6025□□WAG-111A11  
ctg3333□ctg6026□□WAG-21M5  
ctg3333□ctg6026□□WAG-106L11  
ctg3334□ctg6035□□WAG-67G13  
ctg3334□ctg6035□□WAG-78O6  
ctg3335□ctg6038□□WAG-17K4  
ctg3335□ctg6038□□WAG-46N2  
ctg3336□ctg6039□ctg6961□WAG-46D6  
ctg3336□ctg6039□ctg6961□WAG-64I11  
ctg3337□ctg6042□□WAG-5N20  
ctg3337□ctg6042□□WAG-122O24  
ctg3338□ctg6044□□WAG-115J6  
ctg3338□ctg6044□□WAG-130L23  
ctg3339□ctg6052□□WAG-13D8  
ctg3339□ctg6052□□WAG-72O15  
ctg334□□□WAG-48K3  
ctg334□ctg836□ctg685□WAG-35G12  
ctg334□ctg836□ctg685□WAG-77J6  
ctg334□ctg836□ctg685□WAG-81O13  
ctg334□ctg836□ctg685□WAG-88M4  
ctg334□ctg836□ctg685□WAG-118I20  
ctg334□ctg836□ctg685□WAG-120I17  
ctg334□ctg836□ctg685□WAG-126J12  
ctg3340□ctg6054□□WAG-53P14  
ctg3340□ctg6054□□WAG-65J11  
ctg3341□ctg6063□□WAG-26H22  
ctg3341□ctg6063□□WAG-129L21  
ctg3342□ctg6065□□WAG-57E3  
ctg3342□ctg6065□□WAG-118F24  
ctg3343□ctg6066□□WAG-114C6

ctg3343□ctg6066□□WAG-116I6  
ctg3344□ctg6068□□WAG-41A23  
ctg3344□ctg6068□□WAG-109C23  
ctg3345□ctg6071□□WAG-88F13  
ctg3345□ctg6071□□WAG-117L3  
ctg3346□ctg6073□□WAG-83A22  
ctg3346□ctg6073□□WAG-83M21  
ctg3347□ctg6076□□WAG-71P19  
ctg3347□ctg6076□□WAG-104N19  
ctg3348□ctg6077□□WAG-61O7  
ctg3348□ctg6077□□WAG-128A11  
ctg3349□ctg6078□□WAG-58K24  
ctg3349□ctg6078□□WAG-92P13  
ctg335□□□WAG-33N21  
ctg335□□□WAG-48B20  
ctg335□□□WAG-88M20  
ctg335□□□WAG-129J12  
ctg335□ctg1695□□WAG-34I6  
ctg335□ctg1695□ctg1673□WAG-16A12  
ctg335□ctg1695□ctg1673□WAG-16M14  
ctg335□ctg1695□ctg1673□WAG-24E9  
ctg335□ctg1695□ctg1673□WAG-35E3  
ctg335□ctg1695□ctg1673□WAG-35O2  
ctg335□ctg1695□ctg1673□WAG-50G14  
ctg335□ctg1695□ctg1673□WAG-76J17  
ctg335□ctg1695□ctg1673□WAG-82H4  
ctg335□ctg1695□ctg1673□WAG-104K8  
ctg335□ctg1695□ctg1673□WAG-109C5  
ctg335□ctg1741□□WAG-20E14  
ctg335□ctg1741□□WAG-36A22  
ctg335□ctg1741□□WAG-54L6  
ctg335□ctg1741□□WAG-99B12  
ctg335□ctg1741□□WAG-111E3  
ctg335□ctg1741□ctg2343□WAG-16C16  
ctg335□ctg1741□ctg2343□WAG-26F1  
ctg335□ctg1741□ctg2343□WAG-35D18  
ctg335□ctg1741□ctg2343□WAG-118N8  
ctg335□ctg1741□ctg3508□WAG-31H1  
ctg335□ctg1741□ctg3508□WAG-51F7  
ctg335□ctg1741□ctg3508□WAG-82J15  
ctg335□ctg1741□ctg3508□WAG-86P11  
ctg335□ctg1741□ctg3508□WAG-104E19  
ctg335□ctg5359□ctg6296□WAG-82B6  
ctg335□ctg5359□ctg6296□WAG-124E4  
ctg335□ctg5860□□WAG-23B10  
ctg335□ctg5860□□WAG-72M18  
ctg3350□ctg6079□□WAG-49A19  
ctg3350□ctg6079□□WAG-114A14  
ctg3351□ctg6082□□WAG-22H1  
ctg3351□ctg6082□□WAG-22P12  
ctg3352□ctg6083□□WAG-17B24  
ctg3352□ctg6083□□WAG-18J1  
ctg3353□ctg6084□□WAG-1C8  
ctg3353□ctg6084□□WAG-45J10  
ctg3354□ctg6088□□WAG-98L13  
ctg3354□ctg6088□□WAG-105D20

ctg3355□ctg6097□□WAG-26D16  
ctg3355□ctg6097□□WAG-48F3  
ctg3356□ctg6098□□WAG-45D11  
ctg3356□ctg6098□□WAG-92I21  
ctg3357□ctg6100□□WAG-40H19  
ctg3357□ctg6100□□WAG-98L22  
ctg3358□ctg6105□□WAG-11O15  
ctg3358□ctg6105□□WAG-50J19  
ctg3359□ctg6106□□WAG-10B2  
ctg3359□ctg6106□□WAG-43N5  
ctg336□ctg842□□WAG-11A11  
ctg336□ctg842□□WAG-111F1  
ctg336□ctg842□□WAG-116B8  
ctg336□ctg842□ctg2007□WAG-50C4  
ctg336□ctg842□ctg2007□WAG-55I15  
ctg336□ctg842□ctg2007□WAG-85P20  
ctg336□ctg842□ctg2007□WAG-98I22  
ctg336□ctg842□ctg2007□WAG-102M3  
ctg336□ctg842□ctg2007□WAG-116H20  
ctg3360□ctg6109□□WAG-77H10  
ctg3360□ctg6109□□WAG-95L13  
ctg3361□ctg6113□□WAG-15I18  
ctg3361□ctg6113□□WAG-55G8  
ctg3362□ctg6115□□WAG-49J16  
ctg3362□ctg6115□□WAG-118K20  
ctg3363□ctg6116□□WAG-41N21  
ctg3363□ctg6116□□WAG-58O24  
ctg3364□ctg6117□□WAG-1P2  
ctg3364□ctg6117□□WAG-26F10  
ctg3365□□□WAG-46F8  
ctg3365□□□WAG-129K16  
ctg3366□ctg6123□□WAG-7N19  
ctg3366□ctg6123□□WAG-119A16  
ctg3367□ctg6127□□WAG-45C15  
ctg3367□ctg6127□□WAG-105P16  
ctg3368□ctg6133□□WAG-75B19  
ctg3368□ctg6133□□WAG-88J19  
ctg3369□ctg6134□□WAG-88F18  
ctg3369□ctg6134□□WAG-94F20  
ctg337□□□WAG-52C20  
ctg337□ctg5376□ctg6333□WAG-45C14  
ctg337□ctg5376□ctg6333□WAG-92B2  
ctg3370□ctg6138□□WAG-80N8  
ctg3370□ctg6138□□WAG-120B4  
ctg3371□ctg6144□□WAG-34I4  
ctg3371□ctg6144□□WAG-43L3  
ctg3372□ctg6146□□WAG-41M19  
ctg3372□ctg6146□□WAG-116O19  
ctg3373□ctg6151□□WAG-10N6  
ctg3373□ctg6151□□WAG-28C21  
ctg3374□ctg6153□□WAG-25B1  
ctg3374□ctg6153□□WAG-26E7  
ctg3375□ctg6160□□WAG-46G4  
ctg3375□ctg6160□□WAG-121P24  
ctg3376□ctg6162□□WAG-105I10  
ctg3376□ctg6162□□WAG-105J10

ctg3377□ctg6165□□WAG-51B10  
ctg3377□ctg6165□□WAG-51C10  
ctg3378□ctg6171□□WAG-3E11  
ctg3378□ctg6171□□WAG-68D21  
ctg3379□ctg6177□□WAG-93P21  
ctg3379□ctg6177□□WAG-98F24  
ctg338□ctg2008□ctg2125□WAG-79N8  
ctg338□ctg2008□ctg2125□WAG-100P5  
ctg338□ctg2008□ctg2125□WAG-129G9  
ctg338□ctg2008□ctg5643□WAG-20M6  
ctg338□ctg2008□ctg5643□WAG-52N16  
ctg338□ctg846□ctg864□WAG-1C1  
ctg338□ctg846□ctg864□WAG-33F12  
ctg338□ctg846□ctg864□WAG-46C12  
ctg338□ctg846□ctg864□WAG-46E1  
ctg338□ctg846□ctg864□WAG-96J2  
ctg338□ctg846□ctg864□WAG-118B15  
ctg338□ctg846□ctg864□WAG-118H21  
ctg338□ctg846□ctg864□WAG-127O11  
ctg3380□ctg6178□□WAG-26N23  
ctg3380□ctg6178□□WAG-97A11  
ctg3381□ctg6183□□WAG-73E6  
ctg3381□ctg6183□□WAG-82M10  
ctg3382□ctg6185□□WAG-75H17  
ctg3382□ctg6185□□WAG-102D15  
ctg3383□ctg6193□□WAG-61B11  
ctg3383□ctg6193□□WAG-94P4  
ctg3384□ctg6194□□WAG-15O17  
ctg3384□ctg6194□□WAG-58N5  
ctg3385□ctg6202□□WAG-37K3  
ctg3385□ctg6202□□WAG-41D13  
ctg3386□ctg6204□□WAG-33A5  
ctg3386□ctg6204□□WAG-41F15  
ctg3387□ctg6205□□WAG-27I7  
ctg3387□ctg6205□□WAG-31K6  
ctg3388□ctg6207□□WAG-12O19  
ctg3388□ctg6207□□WAG-22M16  
ctg3389□ctg6208□□WAG-18L4  
ctg3389□ctg6208□□WAG-25L19  
ctg339□□□WAG-115G23  
ctg339□ctg1144□□WAG-2H20  
ctg339□ctg1144□ctg1275□WAG-29B22  
ctg339□ctg1144□ctg1275□WAG-44D9  
ctg339□ctg1144□ctg1275□WAG-48A21  
ctg339□ctg1144□ctg1275□WAG-130L18  
ctg339□ctg1144□ctg4302□WAG-21K23  
ctg339□ctg1144□ctg4302□WAG-60E17  
ctg339□ctg1144□ctg4302□WAG-119A7  
ctg3390□ctg6212□□WAG-7L8  
ctg3390□ctg6212□□WAG-9C8  
ctg3391□ctg6215□ctg6962□WAG-51O16  
ctg3391□ctg6215□ctg6962□WAG-54B15  
ctg3392□ctg6221□□WAG-22J10  
ctg3392□ctg6221□□WAG-125K23  
ctg3393□ctg6222□□WAG-61E18  
ctg3393□ctg6222□□WAG-120G12

ctg3394□ctg6229□□WAG-27O15  
ctg3394□ctg6229□□WAG-104O5  
ctg3395□ctg6231□□WAG-25C24  
ctg3395□ctg6231□□WAG-103F7  
ctg3396□ctg6234□□WAG-93C20  
ctg3396□ctg6234□□WAG-95A3  
ctg3397□ctg6236□□WAG-77P5  
ctg3397□ctg6236□□WAG-92A2  
ctg3398□ctg6238□□WAG-86I14  
ctg3398□ctg6238□□WAG-104L3  
ctg3399□ctg6246□□WAG-11B7  
ctg3399□ctg6246□□WAG-59E13  
ctg34□ctg187□ctg199□WAG-29J11  
ctg34□ctg187□ctg199□WAG-60F11  
ctg34□ctg187□ctg199□WAG-89L21  
ctg34□ctg187□ctg199□WAG-90H11  
ctg34□ctg187□ctg199□WAG-104H13  
ctg34□ctg187□ctg199□WAG-108M14  
ctg34□ctg187□ctg199□WAG-109L7  
ctg34□ctg187□ctg199□WAG-110A12  
ctg34□ctg901□ctg744□WAG-16E16  
ctg34□ctg901□ctg744□WAG-35F17  
ctg34□ctg901□ctg744□WAG-94H10  
ctg34□ctg901□ctg744□WAG-99E24  
ctg34□ctg901□ctg744□WAG-118P16  
ctg340□□□WAG-68L7  
ctg340□ctg1003□ctg843□WAG-36N13  
ctg340□ctg1003□ctg843□WAG-81D19  
ctg340□ctg1003□ctg843□WAG-94J9  
ctg340□ctg1003□ctg843□WAG-94N15  
ctg340□ctg1003□ctg843□WAG-116I12  
ctg3400□ctg6248□□WAG-31C8  
ctg3400□ctg6248□□WAG-57A11  
ctg3401□ctg6253□□WAG-45K4  
ctg3401□ctg6253□□WAG-51N14  
ctg3402□ctg6259□□WAG-7B1  
ctg3402□ctg6259□□WAG-40M21  
ctg3403□ctg6261□□WAG-24B1  
ctg3403□ctg6261□□WAG-118E5  
ctg3404□ctg6269□□WAG-40N21  
ctg3404□ctg6269□□WAG-127L10  
ctg3405□ctg6271□□WAG-33P9  
ctg3405□ctg6271□□WAG-60K2  
ctg3406□□□WAG-91K8  
ctg3406□□□WAG-98A1  
ctg3407□□□WAG-9I22  
ctg3407□□□WAG-90D10  
ctg3408□□□WAG-80K2  
ctg3408□□□WAG-90M16  
ctg3408□□□WAG-96B18  
ctg3409□ctg6273□□WAG-5H7  
ctg3409□ctg6273□□WAG-129P24  
ctg341□□□WAG-4E18  
ctg341□□□WAG-29J19  
ctg341□ctg2089□□WAG-1K4  
ctg341□ctg2089□ctg1948□WAG-20I22

ctg341□ctg2089□ctg1948□WAG-30I12  
ctg341□ctg2089□ctg1948□WAG-72F3  
ctg341□ctg2089□ctg1948□WAG-80M1  
ctg341□ctg2089□ctg1948□WAG-118N7  
ctg341□ctg970□□WAG-40A5  
ctg341□ctg970□□WAG-49H18  
ctg341□ctg970□□WAG-67M4  
ctg341□ctg970□□WAG-84H5  
ctg341□ctg970□□WAG-96J20  
ctg341□ctg970□□WAG-114L1  
ctg341□ctg970□ctg1417□WAG-27D7  
ctg341□ctg970□ctg1417□WAG-61A22  
ctg341□ctg970□ctg1417□WAG-127E20  
ctg341□ctg970□ctg2256□WAG-18K14  
ctg341□ctg970□ctg2256□WAG-38I23  
ctg341□ctg970□ctg2256□WAG-92C14  
ctg341□ctg970□ctg5194□WAG-23B17  
ctg341□ctg970□ctg5194□WAG-50A22  
ctg3410□ctg6274□□WAG-91J6  
ctg3410□ctg6274□□WAG-129A18  
ctg3411□ctg6277□□WAG-112J7  
ctg3411□ctg6277□□WAG-125H5  
ctg3412□ctg6278□□WAG-103K17  
ctg3412□ctg6278□□WAG-125F9  
ctg3413□ctg6280□□WAG-72M2  
ctg3413□ctg6280□□WAG-116D22  
ctg3414□ctg6286□□WAG-50M14  
ctg3414□ctg6286□□WAG-108G4  
ctg3415□ctg6287□□WAG-30D13  
ctg3415□ctg6287□□WAG-107A10  
ctg3416□ctg6294□□WAG-2G19  
ctg3416□ctg6294□□WAG-92M17  
ctg3417□ctg6295□□WAG-1G16  
ctg3417□ctg6295□□WAG-91A17  
ctg3418□ctg6297□□WAG-27D17  
ctg3418□ctg6297□□WAG-90I2  
ctg3419□ctg6298□□WAG-62F12  
ctg3419□ctg6298□□WAG-85H8  
ctg342□ctg850□□WAG-92P1  
ctg342□ctg850□ctg1200□WAG-9H4  
ctg342□ctg850□ctg1200□WAG-19F11  
ctg342□ctg850□ctg1200□WAG-24N1  
ctg342□ctg850□ctg1200□WAG-31E8  
ctg342□ctg850□ctg1200□WAG-53J17  
ctg342□ctg850□ctg1200□WAG-65I13  
ctg342□ctg850□ctg1200□WAG-108I3  
ctg3420□ctg6299□□WAG-81K6  
ctg3420□ctg6299□□WAG-92C1  
ctg3421□ctg6300□□WAG-5E16  
ctg3421□ctg6300□□WAG-78H9  
ctg3422□ctg6303□□WAG-73L8  
ctg3422□ctg6303□□WAG-117I12  
ctg3423□ctg6305□□WAG-4G15  
ctg3423□ctg6305□□WAG-72L10  
ctg3424□ctg6307□□WAG-63L23  
ctg3424□ctg6307□□WAG-123K14

ctg3425□ctg6310□□WAG-54A23  
ctg3425□ctg6310□□WAG-116P18  
ctg3426□ctg6314□□WAG-44F18  
ctg3426□ctg6314□□WAG-105B2  
ctg3427□ctg6316□□WAG-35H6  
ctg3427□ctg6316□□WAG-67B5  
ctg3428□ctg6317□□WAG-6D20  
ctg3428□ctg6317□□WAG-32H6  
ctg3429□ctg6318□□WAG-28N2  
ctg3429□ctg6318□□WAG-106D7  
ctg343□ctg851□ctg1180□WAG-7A10  
ctg343□ctg851□ctg1180□WAG-9O4  
ctg343□ctg851□ctg1180□WAG-10M18  
ctg343□ctg851□ctg1180□WAG-15H5  
ctg343□ctg851□ctg1180□WAG-23O14  
ctg343□ctg851□ctg1180□WAG-50J22  
ctg343□ctg851□ctg1180□WAG-94N1  
ctg343□ctg851□ctg1180□WAG-105G13  
ctg3430□ctg6328□□WAG-18M15  
ctg3430□ctg6328□□WAG-106B16  
ctg3431□□□WAG-107K1  
ctg3431□□□WAG-115M15  
ctg3432□□□WAG-91B20  
ctg3432□□□WAG-127F18  
ctg3433□ctg6334□□WAG-97K17  
ctg3433□ctg6334□□WAG-113M5  
ctg3434□ctg6335□□WAG-86B15  
ctg3434□ctg6335□□WAG-109D17  
ctg3435□ctg6341□□WAG-86A18  
ctg3435□ctg6341□□WAG-114M9  
ctg3436□ctg6345□□WAG-35D13  
ctg3436□ctg6345□□WAG-81H12  
ctg3437□ctg6347□□WAG-75L18  
ctg3437□ctg6347□□WAG-116M23  
ctg3438□ctg6352□□WAG-18B23  
ctg3438□ctg6352□□WAG-61L8  
ctg3439□ctg6354□□WAG-56O21  
ctg3439□ctg6354□□WAG-63L2  
ctg344□□□WAG-121A19  
ctg344□ctg975□□WAG-94J23  
ctg344□ctg975□ctg1068□WAG-95E15  
ctg344□ctg975□ctg1068□WAG-99N11  
ctg344□ctg975□ctg1068□WAG-108E22  
ctg344□ctg975□ctg1068□WAG-117I8  
ctg3440□ctg6356□□WAG-46G17  
ctg3440□ctg6356□□WAG-119I15  
ctg3441□ctg6357□□WAG-44N9  
ctg3441□ctg6357□□WAG-101L11  
ctg3442□ctg6363□□WAG-24L7  
ctg3442□ctg6363□□WAG-51N10  
ctg3443□ctg6365□□WAG-6H9  
ctg3443□ctg6365□□WAG-7A9  
ctg3444□ctg6366□□WAG-4P15  
ctg3444□ctg6366□□WAG-77A1  
ctg3445□□□WAG-82H6  
ctg3445□□□WAG-93D15



ctg3446□ctg6371□□WAG-65C20  
ctg3446□ctg6371□□WAG-121J16  
ctg3447□ctg6373□□WAG-45G15  
ctg3447□ctg6373□□WAG-117J5  
ctg3448□ctg6375□□WAG-49A15  
ctg3448□ctg6375□□WAG-116M15  
ctg3449□ctg6379□□WAG-63K21  
ctg3449□ctg6379□□WAG-110N7  
ctg345□□□WAG-21C24  
ctg345□□□WAG-22N21  
ctg345□□□WAG-44F8  
ctg345□□□WAG-49J21  
ctg345□ctg1428□□WAG-24C15  
ctg345□ctg1428□□WAG-47L16  
ctg345□ctg1428□□WAG-105L4  
ctg345□ctg1428□ctg1618□WAG-16K20  
ctg345□ctg1428□ctg1618□WAG-50P1  
ctg345□ctg1428□ctg1618□WAG-71J6  
ctg345□ctg1428□ctg1618□WAG-75P17  
ctg345□ctg1428□ctg1618□WAG-108J10  
ctg345□ctg1428□ctg6950□WAG-67J4  
ctg345□ctg1428□ctg6950□WAG-87J13  
ctg3450□ctg6381□□WAG-4G6  
ctg3450□ctg6381□□WAG-108G1  
ctg3451□ctg6382□□WAG-55B1  
ctg3451□ctg6382□□WAG-104A5  
ctg3452□ctg6385□□WAG-101J9  
ctg3452□ctg6385□□WAG-123I6  
ctg3453□ctg6386□□WAG-77J11  
ctg3453□ctg6386□□WAG-101A9  
ctg3454□ctg6387□□WAG-8M2  
ctg3454□ctg6387□□WAG-99K12  
ctg3455□ctg6388□□WAG-64C9  
ctg3455□ctg6388□□WAG-97P8  
ctg3456□ctg6390□□WAG-46G19  
ctg3456□ctg6390□□WAG-76J9  
ctg3457□ctg6393□□WAG-65F20  
ctg3457□ctg6393□□WAG-75D23  
ctg3458□ctg6396□□WAG-22C17  
ctg3458□ctg6396□□WAG-62L14  
ctg3459□ctg6397□□WAG-30L16  
ctg3459□ctg6397□□WAG-62L6  
ctg346□ctg1179□□WAG-22J6  
ctg346□ctg1179□ctg1810□WAG-16D19  
ctg346□ctg1179□ctg1810□WAG-42G14  
ctg346□ctg1179□ctg1810□WAG-58M13  
ctg346□ctg1179□ctg1810□WAG-72B13  
ctg346□ctg1179□ctg1810□WAG-78B13  
ctg346□ctg1179□ctg5510□WAG-64P6  
ctg346□ctg1179□ctg5510□WAG-88J13  
ctg346□ctg3507□□WAG-3B19  
ctg346□ctg3507□□WAG-93L13  
ctg346□ctg3507□ctg6646□WAG-55F8  
ctg346□ctg3507□ctg6646□WAG-73I20  
ctg3460□ctg6401□□WAG-56O20  
ctg3460□ctg6401□□WAG-107N3

ctg3461□ctg6402□□WAG-54L24  
ctg3461□ctg6402□□WAG-115C11  
ctg3462□ctg6404□□WAG-54A10  
ctg3462□ctg6404□□WAG-54D20  
ctg3463□ctg6405□□WAG-27G9  
ctg3463□ctg6405□□WAG-53I20  
ctg3464□ctg6406□□WAG-47D16  
ctg3464□ctg6406□□WAG-126E1  
ctg3465□ctg6407□□WAG-23O2  
ctg3465□ctg6407□□WAG-47D1  
ctg3466□ctg6413□□WAG-19H22  
ctg3466□ctg6413□□WAG-85O16  
ctg3467□ctg6416□□WAG-8K14  
ctg3467□ctg6416□□WAG-51I23  
ctg3468□□□WAG-32N11  
ctg3468□□□WAG-129B6  
ctg3469□□□WAG-113C22  
ctg3469□□□WAG-120C13  
ctg347□□□WAG-21N13  
ctg347□ctg1010□□WAG-88I18  
ctg347□ctg1010□ctg1109□WAG-20B12  
ctg347□ctg1010□ctg1109□WAG-54H10  
ctg347□ctg1010□ctg1109□WAG-64K3  
ctg347□ctg1010□ctg1109□WAG-126D24  
ctg347□ctg1010□ctg1109□WAG-128D8  
ctg347□ctg1010□ctg4048□WAG-53C4  
ctg347□ctg1010□ctg4048□WAG-58P20  
ctg347□ctg1010□ctg4048□WAG-68A4  
ctg3470□□□WAG-57K20  
ctg3470□□□WAG-102K13  
ctg3471□□□WAG-18M13  
ctg3471□□□WAG-57B13  
ctg3472□ctg6422□□WAG-62C15  
ctg3472□ctg6422□□WAG-116C5  
ctg3473□ctg6426□□WAG-44N23  
ctg3473□ctg6426□□WAG-108H11  
ctg3474□ctg6427□□WAG-103H18  
ctg3474□ctg6427□□WAG-121F1  
ctg3475□ctg6428□□WAG-103D4  
ctg3475□ctg6428□□WAG-111C8  
ctg3476□ctg6429□□WAG-2H16  
ctg3476□ctg6429□□WAG-95M7  
ctg3477□ctg6431□□WAG-86D16  
ctg3477□ctg6431□□WAG-122J11  
ctg3478□ctg6432□□WAG-68H4  
ctg3478□ctg6432□□WAG-83P3  
ctg3479□ctg6434□□WAG-67C1  
ctg3479□ctg6434□□WAG-67I7  
ctg348□ctg979□□WAG-4O3  
ctg348□ctg979□□WAG-37A10  
ctg348□ctg979□□WAG-48G4  
ctg348□ctg979□ctg1071□WAG-22K4  
ctg348□ctg979□ctg1071□WAG-78C15  
ctg348□ctg979□ctg1071□WAG-87D14  
ctg348□ctg979□ctg1071□WAG-88K9  
ctg348□ctg979□ctg1071□WAG-103B2

ctg3480□ctg6437□□WAG-25I24  
ctg3480□ctg6437□□WAG-57F17  
ctg3481□ctg6438□□WAG-56N19  
ctg3481□ctg6438□□WAG-79K7  
ctg3482□ctg6439□ctg6965□WAG-6G15  
ctg3482□ctg6439□ctg6965□WAG-54I10  
ctg3483□ctg6440□□WAG-23L2  
ctg3483□ctg6440□□WAG-47H2  
ctg3484□ctg6445□□WAG-28J18  
ctg3484□ctg6445□□WAG-76C11  
ctg3485□ctg6447□□WAG-13M7  
ctg3485□ctg6447□□WAG-55L9  
ctg3486□ctg6448□□WAG-12C10  
ctg3486□ctg6448□□WAG-116C20  
ctg3487□ctg6449□□WAG-9M2  
ctg3487□ctg6449□□WAG-11D2  
ctg3488□ctg6451□□WAG-3P13  
ctg3488□ctg6451□□WAG-14F8  
ctg3489□ctg6452□□WAG-1I20  
ctg3489□ctg6452□□WAG-25P4  
ctg349□□□WAG-5L14  
ctg349□□□WAG-67G8  
ctg349□□□WAG-75D10  
ctg349□ctg1440□□WAG-25N5  
ctg349□ctg1440□ctg2186□WAG-36E20  
ctg349□ctg1440□ctg2186□WAG-96L19  
ctg349□ctg1440□ctg2186□WAG-113G3  
ctg349□ctg1440□ctg2186□WAG-115H11  
ctg349□ctg1440□ctg2186□WAG-118P7  
ctg349□ctg1440□ctg6022□WAG-69N2  
ctg349□ctg1440□ctg6022□WAG-104M23  
ctg3490□□□WAG-65F15  
ctg3490□□□WAG-124L1  
ctg3491□□□WAG-112L18  
ctg3491□□□WAG-119J16  
ctg3492□□□WAG-33P20  
ctg3492□□□WAG-93G18  
ctg3493□□□WAG-29L22  
ctg3493□□□WAG-54A18  
ctg3494□□□WAG-9C10  
ctg3494□□□WAG-90A2  
ctg3495□ctg6453□□WAG-63C2  
ctg3495□ctg6453□□WAG-119A13  
ctg3496□ctg6455□□WAG-84D19  
ctg3496□ctg6455□□WAG-114K24  
ctg3497□ctg6457□□WAG-40D14  
ctg3497□ctg6457□□WAG-109O11  
ctg3498□ctg6459□□WAG-103C5  
ctg3498□ctg6459□□WAG-118H23  
ctg3499□ctg6460□□WAG-41F8  
ctg3499□ctg6460□□WAG-102K23  
ctg35□□□WAG-105K8  
ctg35□□□WAG-122P21  
ctg35□ctg168□ctg132□WAG-3G8  
ctg35□ctg168□ctg132□WAG-15C2  
ctg35□ctg168□ctg132□WAG-15J11

ctg35□ctg168□ctg132□WAG-32D10  
ctg35□ctg168□ctg132□WAG-44N22  
ctg35□ctg168□ctg132□WAG-61N2  
ctg35□ctg168□ctg132□WAG-74A15  
ctg35□ctg168□ctg132□WAG-82I18  
ctg35□ctg168□ctg132□WAG-98I2  
ctg35□ctg168□ctg132□WAG-113D2  
ctg35□ctg168□ctg132□WAG-126C15  
ctg35□ctg665□□WAG-86N13  
ctg35□ctg665□ctg682□WAG-36L1  
ctg35□ctg665□ctg682□WAG-69O14  
ctg35□ctg665□ctg682□WAG-73I17  
ctg35□ctg665□ctg682□WAG-79D17  
ctg35□ctg665□ctg682□WAG-113I20  
ctg350□ctg1019□□WAG-82G3  
ctg350□ctg1019□□WAG-92G23  
ctg350□ctg1019□ctg1123□WAG-20H20  
ctg350□ctg1019□ctg1123□WAG-35C4  
ctg350□ctg1019□ctg1123□WAG-86H15  
ctg350□ctg1019□ctg1123□WAG-92N20  
ctg3500□ctg6463□□WAG-13C17  
ctg3500□ctg6463□□WAG-94O7  
ctg3501□ctg6464□□WAG-56P5  
ctg3501□ctg6464□□WAG-91E8  
ctg3502□ctg6465□□WAG-61C18  
ctg3502□ctg6465□□WAG-89M23  
ctg3503□ctg6467□□WAG-82L6  
ctg3503□ctg6467□□WAG-97D5  
ctg3504□ctg6469□□WAG-78P8  
ctg3504□ctg6469□□WAG-94H2  
ctg3505□ctg6471□□WAG-72I20  
ctg3505□ctg6471□□WAG-76N23  
ctg3506□ctg6474□□WAG-52A10  
ctg3506□ctg6474□□WAG-127L20  
ctg3507□ctg6475□□WAG-48P10  
ctg3507□ctg6475□□WAG-112M9  
ctg3508□ctg6478□□WAG-34H16  
ctg3508□ctg6478□□WAG-64L18  
ctg3509□ctg6479□□WAG-13P1  
ctg3509□ctg6479□□WAG-31K4  
ctg351□□□WAG-54O4  
ctg351□ctg985□ctg1046□WAG-23N4  
ctg351□ctg985□ctg1046□WAG-50E5  
ctg351□ctg985□ctg1046□WAG-61B3  
ctg351□ctg985□ctg1046□WAG-68K2  
ctg351□ctg985□ctg1046□WAG-97E21  
ctg351□ctg985□ctg1046□WAG-102O6  
ctg3510□ctg6482□□WAG-11F13  
ctg3510□ctg6482□□WAG-11M21  
ctg3511□□□WAG-40G3  
ctg3511□□□WAG-117N17  
ctg3512□□□WAG-81O11  
ctg3512□□□WAG-116D3  
ctg3513□□□WAG-76J18  
ctg3513□□□WAG-126M9  
ctg3514□□□WAG-57G19

ctg3514□□□WAG-87J19  
ctg3515□□□WAG-54N3  
ctg3515□□□WAG-104G22  
ctg3516□□□WAG-43D9  
ctg3516□□□WAG-69J17  
ctg3517□□□WAG-29E21  
ctg3517□□□WAG-44M3  
ctg3518□□□WAG-20F16  
ctg3518□□□WAG-30P13  
ctg3519□□□WAG-17N22  
ctg3519□□□WAG-92J10  
ctg352□ctg867□ctg970□WAG-16H18  
ctg352□ctg867□ctg970□WAG-26E8  
ctg352□ctg867□ctg970□WAG-32O14  
ctg352□ctg867□ctg970□WAG-46A22  
ctg352□ctg867□ctg970□WAG-48L6  
ctg352□ctg867□ctg970□WAG-67E20  
ctg352□ctg867□ctg970□WAG-68O23  
ctg352□ctg867□ctg970□WAG-95N5  
ctg3520□ctg6484□□WAG-47N7  
ctg3520□ctg6484□□WAG-119O5  
ctg3521□ctg6485□□WAG-13N1  
ctg3521□ctg6485□□WAG-98E21  
ctg3522□ctg6489□□WAG-58P10  
ctg3522□ctg6489□□WAG-67B23  
ctg3523□ctg6497□□WAG-27N7  
ctg3523□ctg6497□□WAG-112O2  
ctg3524□ctg6498□□WAG-26F23  
ctg3524□ctg6498□□WAG-43I14  
ctg3525□ctg6501□□WAG-16M12  
ctg3525□ctg6501□□WAG-127J4  
ctg3526□ctg6505□□WAG-68I23  
ctg3526□ctg6505□□WAG-112M5  
ctg3527□□□WAG-94A22  
ctg3527□□□WAG-122E17  
ctg3528□□□WAG-100D5  
ctg3528□□□WAG-119O6  
ctg3529□□□WAG-7G23  
ctg3529□□□WAG-110P16  
ctg353□□□WAG-70F9  
ctg353□ctg1029□□WAG-103H7  
ctg353□ctg1029□ctg1135□WAG-33H9  
ctg353□ctg1029□ctg1135□WAG-58G14  
ctg353□ctg1029□ctg1135□WAG-94A9  
ctg353□ctg1029□ctg1135□WAG-98I9  
ctg3530□□□WAG-82O7  
ctg3530□□□WAG-101L8  
ctg3531□□□WAG-18E8  
ctg3531□□□WAG-66L22  
ctg3532□□□WAG-11O6  
ctg3532□□□WAG-53A15  
ctg3533□□□WAG-8B8  
ctg3533□□□WAG-70G18  
ctg3534□ctg6507□□WAG-111N23  
ctg3534□ctg6507□□WAG-130O24  
ctg3535□ctg6512□□WAG-91P6

ctg3535□ctg6512□□WAG-111F12  
ctg3536□ctg6516□□WAG-62C13  
ctg3536□ctg6516□□WAG-73D20  
ctg3537□ctg6517□□WAG-31K18  
ctg3537□ctg6517□□WAG-59F13  
ctg3538□ctg6521□□WAG-33L2  
ctg3538□ctg6521□□WAG-45F13  
ctg3539□ctg6522□□WAG-12K12  
ctg3539□ctg6522□□WAG-38D1  
ctg354□□□WAG-53G5  
ctg354□□□WAG-115O4  
ctg354□ctg6601□□WAG-69L21  
ctg354□ctg6601□□WAG-130I7  
ctg354□ctg6601□ctg4552□WAG-55B19  
ctg354□ctg6601□ctg4552□WAG-100O12  
ctg354□ctg6601□ctg5362□WAG-41M9  
ctg354□ctg6601□ctg5362□WAG-95K19  
ctg354□ctg869□□WAG-13C4  
ctg354□ctg869□□WAG-17D8  
ctg354□ctg869□□WAG-74H23  
ctg354□ctg869□□WAG-91M5  
ctg354□ctg869□□WAG-112D9  
ctg354□ctg869□ctg3953□WAG-33N10  
ctg354□ctg869□ctg3953□WAG-50L1  
ctg354□ctg869□ctg3953□WAG-79E14  
ctg354□ctg869□ctg3953□WAG-130F21  
ctg354□ctg869□ctg6450□WAG-79B2  
ctg354□ctg869□ctg6450□WAG-112C9  
ctg354□ctg869□ctg934□WAG-19I10  
ctg354□ctg869□ctg934□WAG-33F19  
ctg354□ctg869□ctg934□WAG-55O6  
ctg354□ctg869□ctg934□WAG-73H13  
ctg354□ctg869□ctg934□WAG-108D15  
ctg354□ctg869□ctg934□WAG-108D17  
ctg3540□ctg6523□□WAG-13P21  
ctg3540□ctg6523□□WAG-15K17  
ctg3541□ctg6526□□WAG-7K12  
ctg3541□ctg6526□□WAG-49F8  
ctg3542□□□WAG-61I20  
ctg3542□□□WAG-123D10  
ctg3543□□□WAG-7L5  
ctg3543□□□WAG-117I7  
ctg3544□□□WAG-62D6  
ctg3544□□□WAG-101B5  
ctg3545□□□WAG-53J23  
ctg3545□□□WAG-100I8  
ctg3546□□□WAG-94N23  
ctg3546□□□WAG-97H16  
ctg3547□□□WAG-67D21  
ctg3547□□□WAG-90J9  
ctg3548□□□WAG-54G8  
ctg3548□□□WAG-82N22  
ctg3549□□□WAG-9L3  
ctg3549□□□WAG-50D5  
ctg355□ctg992□ctg1353□WAG-20O9  
ctg355□ctg992□ctg1353□WAG-22G2

ctg355□ctg992□ctg1353□WAG-56N23  
ctg355□ctg992□ctg1353□WAG-72P10  
ctg355□ctg992□ctg1353□WAG-105N21  
ctg355□ctg992□ctg1353□WAG-115B15  
ctg355□ctg992□ctg1353□WAG-116E22  
ctg355□ctg992□ctg1353□WAG-125M2  
ctg3550□□□WAG-47J21  
ctg3550□□□WAG-95I13  
ctg3551□□□WAG-46D4  
ctg3551□□□WAG-86O11  
ctg3552□□□WAG-45K14  
ctg3552□□□WAG-117J20  
ctg3553□□□WAG-34O11  
ctg3553□□□WAG-104H2  
ctg3554□□□WAG-19C17  
ctg3554□□□WAG-41F4  
ctg3555□□□WAG-15B8  
ctg3555□□□WAG-99A19  
ctg3556□□□WAG-23I16  
ctg3556□□□WAG-93I2  
ctg3557□ctg6530□□WAG-69M24  
ctg3557□ctg6530□□WAG-115O10  
ctg3558□ctg6533□□WAG-63I17  
ctg3558□ctg6533□□WAG-87E13  
ctg3559□ctg6534□□WAG-76I22  
ctg3559□ctg6534□□WAG-94G22  
ctg356□□□WAG-121C13  
ctg356□ctg1000□ctg1028□WAG-11L14  
ctg356□ctg1000□ctg1028□WAG-95K11  
ctg356□ctg1000□ctg1028□WAG-96A13  
ctg356□ctg1000□ctg1028□WAG-107O16  
ctg356□ctg1000□ctg1028□WAG-124J20  
ctg3560□ctg6536□□WAG-26M20  
ctg3560□ctg6536□□WAG-65P4  
ctg3561□ctg6538□□WAG-54E15  
ctg3561□ctg6538□□WAG-65I2  
ctg3562□ctg6539□□WAG-46D8  
ctg3562□ctg6539□□WAG-94A12  
ctg3563□ctg6540□□WAG-44K5  
ctg3563□ctg6540□□WAG-66G6  
ctg3564□□□WAG-82B18  
ctg3564□□□WAG-122D22  
ctg3565□ctg6543□□WAG-101A19  
ctg3565□ctg6543□□WAG-116F14  
ctg3566□□□WAG-62E14  
ctg3566□□□WAG-112B1  
ctg3567□□□WAG-28K4  
ctg3567□□□WAG-110D24  
ctg3568□□□WAG-63O6  
ctg3568□□□WAG-106D12  
ctg3569□ctg6545□□WAG-67M22  
ctg3569□ctg6545□□WAG-102D2  
ctg357□□□WAG-19K16  
ctg357□□□WAG-69D21  
ctg357□□□WAG-77I10  
ctg357□□□WAG-94J5

ctg357□ctg1001□□WAG-48N18  
ctg357□ctg1001□□WAG-57O6  
ctg357□ctg1001□□WAG-80A2  
ctg357□ctg1001□□WAG-90D7  
ctg357□ctg1001□ctg1171□WAG-16A14  
ctg357□ctg1001□ctg1171□WAG-34E7  
ctg357□ctg1001□ctg1171□WAG-42P6  
ctg357□ctg1001□ctg1171□WAG-112I22  
ctg357□ctg1001□ctg1269□WAG-2M14  
ctg357□ctg1001□ctg1269□WAG-9K19  
ctg357□ctg1001□ctg1269□WAG-41G18  
ctg357□ctg1001□ctg1269□WAG-75A1  
ctg357□ctg1001□ctg1269□WAG-114L18  
ctg357□ctg6421□□WAG-116J5  
ctg357□ctg6421□□WAG-118L21  
ctg3570□□□WAG-6A20  
ctg3570□□□WAG-95A8  
ctg3571□□□WAG-56K10  
ctg3571□□□WAG-79K10  
ctg3572□□□WAG-74F12  
ctg3572□□□WAG-122N9  
ctg3573□ctg6547□□WAG-70A4  
ctg3573□ctg6547□□WAG-110G2  
ctg3574□□□WAG-22H10  
ctg3574□□□WAG-63K11  
ctg3575□□□WAG-48C18  
ctg3575□□□WAG-62I19  
ctg3576□ctg6548□□WAG-48K7  
ctg3576□ctg6548□□WAG-62L10  
ctg3577□□□WAG-36B11  
ctg3577□□□WAG-82B13  
ctg3578□□□WAG-35G8  
ctg3578□□□WAG-63D5  
ctg3579□□□WAG-30E12  
ctg3579□□□WAG-77I24  
ctg358□□□WAG-19N9  
ctg358□□□WAG-41N16  
ctg358□□□WAG-43D6  
ctg358□ctg1007□□WAG-29P5  
ctg358□ctg1007□□WAG-54F14  
ctg358□ctg1007□□WAG-112O12  
ctg358□ctg1007□ctg1172□WAG-30J23  
ctg358□ctg1007□ctg1172□WAG-66A11  
ctg358□ctg1007□ctg1172□WAG-87G21  
ctg358□ctg1007□ctg1172□WAG-87J16  
ctg358□ctg1007□ctg1172□WAG-94M7  
ctg358□ctg1007□ctg1172□WAG-109H16  
ctg358□ctg1007□ctg1172□WAG-110M20  
ctg358□ctg1007□ctg1172□WAG-125J13  
ctg358□ctg1007□ctg1172□WAG-127C21  
ctg358□ctg1007□ctg1172□WAG-127E12  
ctg358□ctg1007□ctg3013□WAG-19P15  
ctg358□ctg1007□ctg3013□WAG-25G2  
ctg358□ctg1007□ctg3013□WAG-57A8  
ctg358□ctg1007□ctg3013□WAG-72I1  
ctg358□ctg1007□ctg3847□WAG-8G9



ctg358□ctg1007□ctg3847□WAG-43N12  
ctg358□ctg1007□ctg3847□WAG-97J22  
ctg358□ctg1007□ctg4544□WAG-26E23  
ctg358□ctg1007□ctg4544□WAG-129E3  
ctg358□ctg5557□ctg6702□WAG-59G6  
ctg358□ctg5557□ctg6702□WAG-111M19  
ctg3580□□□WAG-26H20  
ctg3580□□□WAG-95E3  
ctg3581□□□WAG-19A5  
ctg3581□□□WAG-25D6  
ctg3582□□□WAG-10A6  
ctg3582□□□WAG-77N10  
ctg3583□□□WAG-79B7  
ctg3583□□□WAG-116N18  
ctg3584□□□WAG-76N19  
ctg3584□□□WAG-130C3  
ctg3585□□□WAG-72J18  
ctg3585□□□WAG-113D5  
ctg3586□□□WAG-52N12  
ctg3586□□□WAG-105I4  
ctg3587□□□WAG-24N17  
ctg3587□□□WAG-25N1  
ctg3588□ctg6552□□WAG-67G20  
ctg3588□ctg6552□□WAG-96C6  
ctg3589□□□WAG-36L16  
ctg3589□□□WAG-127G11  
ctg359□ctg878□ctg723□WAG-32P11  
ctg359□ctg878□ctg723□WAG-51C2  
ctg359□ctg878□ctg723□WAG-78G8  
ctg359□ctg878□ctg723□WAG-85H4  
ctg359□ctg878□ctg723□WAG-121P13  
ctg3590□□□WAG-95N4  
ctg3590□□□WAG-123B19  
ctg3591□□□WAG-96B10  
ctg3591□□□WAG-120K4  
ctg3592□□□WAG-22B12  
ctg3592□□□WAG-119H9  
ctg3593□□□WAG-54B23  
ctg3593□□□WAG-114G2  
ctg3594□□□WAG-33F22  
ctg3594□□□WAG-100B5  
ctg3595□□□WAG-88K22  
ctg3595□□□WAG-130N3  
ctg3596□□□WAG-44K14  
ctg3596□□□WAG-86O24  
ctg3597□□□WAG-51L4  
ctg3597□□□WAG-84G16  
ctg3598□□□WAG-4M12  
ctg3598□□□WAG-83G18  
ctg3599□□□WAG-63K6  
ctg3599□□□WAG-80E10  
ctg36□□□WAG-1I23  
ctg36□□□WAG-10J3  
ctg36□□□WAG-30C7  
ctg36□□□WAG-52G6  
ctg36□ctg209□□WAG-58O1

ctg36□ctg209□□WAG-65I5  
ctg36□ctg209□ctg235□WAG-8K22  
ctg36□ctg209□ctg235□WAG-25C19  
ctg36□ctg209□ctg235□WAG-31E19  
ctg36□ctg209□ctg235□WAG-61A4  
ctg36□ctg209□ctg235□WAG-68K1  
ctg36□ctg209□ctg235□WAG-80L15  
ctg36□ctg209□ctg235□WAG-82E24  
ctg36□ctg209□ctg235□WAG-95P4  
ctg36□ctg209□ctg235□WAG-114N18  
ctg36□ctg4802□□WAG-42A17  
ctg36□ctg4802□□WAG-99I23  
ctg36□ctg4802□□WAG-122J22  
ctg360□□□WAG-26E16  
ctg360□□□WAG-66I23  
ctg360□□□WAG-80D4  
ctg360□ctg1103□□WAG-7P22  
ctg360□ctg1103□□WAG-25D2  
ctg360□ctg1103□□WAG-45M6  
ctg360□ctg1103□□WAG-83M7  
ctg360□ctg1103□ctg2446□WAG-52E17  
ctg360□ctg1103□ctg2446□WAG-52H10  
ctg360□ctg1103□ctg2446□WAG-73A12  
ctg360□ctg1103□ctg2446□WAG-114M10  
ctg360□ctg1103□ctg2495□WAG-15O15  
ctg360□ctg1103□ctg2495□WAG-25B7  
ctg360□ctg1103□ctg2495□WAG-65J10  
ctg360□ctg1103□ctg2495□WAG-118C19  
ctg360□ctg1103□ctg2495□WAG-126D4  
ctg360□ctg1103□ctg3968□WAG-94N21  
ctg360□ctg1103□ctg3968□WAG-105M24  
ctg360□ctg1103□ctg3968□WAG-110A8  
ctg360□ctg1103□ctg4155□WAG-41K21  
ctg360□ctg1103□ctg4155□WAG-43G10  
ctg360□ctg1103□ctg4155□WAG-115H23  
ctg360□ctg2072□□WAG-80A16  
ctg360□ctg2072□ctg2533□WAG-76G24  
ctg360□ctg2072□ctg2533□WAG-129D24  
ctg360□ctg2458□□WAG-28N6  
ctg360□ctg2458□ctg3182□WAG-30D18  
ctg360□ctg2458□ctg3182□WAG-66F13  
ctg360□ctg2458□ctg3182□WAG-90N15  
ctg360□ctg2458□ctg3182□WAG-94B14  
ctg360□ctg2755□ctg3530□WAG-27B3  
ctg360□ctg2755□ctg3530□WAG-57I7  
ctg360□ctg2755□ctg3530□WAG-59N5  
ctg360□ctg2755□ctg3530□WAG-124P8  
ctg3600□□□WAG-41N24  
ctg3600□□□WAG-72P9  
ctg3601□□□WAG-2H10  
ctg3601□□□WAG-69L4  
ctg3602□ctg6555□ctg6968□WAG-15H8  
ctg3602□ctg6555□ctg6968□WAG-68L22  
ctg3603□□□WAG-2B9  
ctg3603□□□WAG-61D14  
ctg3604□□□WAG-51I17

ctg3604□□□WAG-110H13  
ctg3605□□□WAG-49N11  
ctg3605□□□WAG-75G22  
ctg3606□□□WAG-49E22  
ctg3606□□□WAG-75D24  
ctg3607□□□WAG-46N1  
ctg3607□□□WAG-91I3  
ctg3608□□□WAG-9F9  
ctg3608□□□WAG-34G13  
ctg3609□□□WAG-21N3  
ctg3609□□□WAG-77H5  
ctg361□□□WAG-34C10  
ctg361□□□WAG-41B3  
ctg361□□□WAG-107N11  
ctg361□ctg1677□ctg1532□WAG-10L10  
ctg361□ctg1677□ctg1532□WAG-96C8  
ctg361□ctg1677□ctg1532□WAG-103C17  
ctg361□ctg1677□ctg1532□WAG-107B7  
ctg361□ctg1677□ctg1532□WAG-110M1  
ctg361□ctg1677□ctg1532□WAG-129F24  
ctg361□ctg883□□WAG-89O8  
ctg361□ctg883□□WAG-93J6  
ctg361□ctg883□ctg1301□WAG-7E21  
ctg361□ctg883□ctg1301□WAG-27J10  
ctg361□ctg883□ctg1301□WAG-43H16  
ctg361□ctg883□ctg1301□WAG-52E8  
ctg361□ctg883□ctg1301□WAG-64A1  
ctg3610□□□WAG-9A22  
ctg3610□□□WAG-36N7  
ctg3611□□□WAG-3N4  
ctg3611□□□WAG-62N3  
ctg3612□□□WAG-40O2  
ctg3612□□□WAG-93J20  
ctg3613□□□WAG-33J6  
ctg3613□□□WAG-98K11  
ctg3614□ctg6556□□WAG-21K9  
ctg3614□ctg6556□□WAG-114O3  
ctg3615□ctg6557□□WAG-97N12  
ctg3615□ctg6557□□WAG-97O12  
ctg3616□□□WAG-117J2  
ctg3616□□□WAG-128H21  
ctg3617□□□WAG-76N10  
ctg3617□□□WAG-123I11  
ctg3618□□□WAG-68E8  
ctg3618□□□WAG-121E16  
ctg3619□□□WAG-112H3  
ctg3619□□□WAG-117P3  
ctg362□□□WAG-49M16  
ctg362□□□WAG-76O16  
ctg362□ctg1190□□WAG-40L5  
ctg362□ctg1190□□WAG-40O5  
ctg362□ctg1190□□WAG-78K22  
ctg362□ctg1190□□WAG-91D14  
ctg362□ctg1190□ctg1680□WAG-23K21  
ctg362□ctg1190□ctg1680□WAG-31K17  
ctg362□ctg1190□ctg1680□WAG-66D13

ctg362□ctg1190□ctg1680□WAG-66L17  
ctg362□ctg1190□ctg1680□WAG-68B5  
ctg362□ctg1190□ctg1680□WAG-103N17  
ctg362□ctg1190□ctg1680□WAG-120I18  
ctg362□ctg1190□ctg1680□WAG-130O22  
ctg3620□□□WAG-117H21  
ctg3620□□□WAG-130H20  
ctg3621□□□WAG-31A12  
ctg3621□□□WAG-116P21  
ctg3622□□□WAG-57M21  
ctg3622□□□WAG-112I15  
ctg3623□□□WAG-62N1  
ctg3623□□□WAG-109E8  
ctg3624□□□WAG-79L24  
ctg3624□□□WAG-107L20  
ctg3625□□□WAG-104A15  
ctg3625□□□WAG-104B13  
ctg3626□□□WAG-98M20  
ctg3626□□□WAG-100E23  
ctg3627□□□WAG-54H15  
ctg3627□□□WAG-92C10  
ctg3628□□□WAG-34O23  
ctg3628□□□WAG-82O19  
ctg3629□□□WAG-81F24  
ctg3629□□□WAG-92H15  
ctg363□ctg885□ctg729□WAG-3E2  
ctg363□ctg885□ctg729□WAG-4A7  
ctg363□ctg885□ctg729□WAG-18K10  
ctg363□ctg885□ctg729□WAG-41L15  
ctg363□ctg885□ctg729□WAG-70O12  
ctg3630□□□WAG-8G6  
ctg3630□□□WAG-76M11  
ctg3631□□□WAG-73A15  
ctg3631□□□WAG-81F16  
ctg3632□□□WAG-71F1  
ctg3632□□□WAG-78F23  
ctg3633□□□WAG-63F22  
ctg3633□□□WAG-66H7  
ctg3634□□□WAG-16O1  
ctg3634□□□WAG-63I1  
ctg3635□□□WAG-61H12  
ctg3635□□□WAG-124E23  
ctg3636□□□WAG-54P5  
ctg3636□□□WAG-80F17  
ctg3637□□□WAG-49I4  
ctg3637□□□WAG-54K7  
ctg3638□□□WAG-43J11  
ctg3638□□□WAG-53M17  
ctg3639□□□WAG-39N4  
ctg3639□□□WAG-95D9  
ctg364□ctg1016□ctg1117□WAG-22A3  
ctg364□ctg1016□ctg1117□WAG-55M21  
ctg364□ctg1016□ctg1117□WAG-89H16  
ctg364□ctg1016□ctg1117□WAG-101E15  
ctg364□ctg1016□ctg1117□WAG-121D12  
ctg364□ctg1016□ctg1117□WAG-126N13

ctg3640□□□WAG-2M12  
ctg3640□□□WAG-38C13  
ctg3641□□□WAG-24J17  
ctg3641□□□WAG-35O23  
ctg3642□□□WAG-33O11  
ctg3642□□□WAG-43B10  
ctg3643□□□WAG-11P14  
ctg3643□□□WAG-26C18  
ctg3644□□□WAG-26A9  
ctg3644□□□WAG-62F19  
ctg3645□□□WAG-20B19  
ctg3645□□□WAG-81L22  
ctg3646□□□WAG-19D19  
ctg3646□□□WAG-50G24  
ctg3647□□□WAG-1D8  
ctg3647□□□WAG-8B1  
ctg3648□□□WAG-28J7  
ctg3648□□□WAG-85N1  
ctg3649□□□WAG-12B21  
ctg3649□□□WAG-44M12  
ctg365□ctg1017□□WAG-59A22  
ctg365□ctg1017□□WAG-85M5  
ctg365□ctg1017□ctg1174□WAG-17P18  
ctg365□ctg1017□ctg1174□WAG-19B17  
ctg365□ctg1017□ctg1174□WAG-26K24  
ctg365□ctg1017□ctg1174□WAG-38D9  
ctg365□ctg1017□ctg1174□WAG-40K22  
ctg365□ctg1017□ctg1174□WAG-45I15  
ctg365□ctg1017□ctg1174□WAG-75E22  
ctg365□ctg1017□ctg1174□WAG-84O18  
ctg365□ctg1017□ctg1174□WAG-93L23  
ctg365□ctg1017□ctg1174□WAG-98G20  
ctg365□ctg3610□ctg3792□WAG-1A22  
ctg365□ctg3610□ctg3792□WAG-89O6  
ctg365□ctg3956□ctg4230□WAG-90J13  
ctg365□ctg3956□ctg4230□WAG-109L10  
ctg365□ctg4133□ctg4389□WAG-6F21  
ctg365□ctg4133□ctg4389□WAG-16I21  
ctg365□ctg4133□ctg4389□WAG-93P10  
ctg365□ctg6053□□WAG-70G11  
ctg365□ctg6053□□WAG-115D21  
ctg3650□□□WAG-22M5  
ctg3650□□□WAG-42M14  
ctg3651□□□WAG-13B20  
ctg3651□□□WAG-53E16  
ctg3652□ctg6559□□WAG-83P19  
ctg3652□ctg6559□□WAG-126N22  
ctg3653□□□WAG-80K1  
ctg3653□□□WAG-128D6  
ctg3654□□□WAG-112A3  
ctg3654□□□WAG-123P24  
ctg3655□□□WAG-1A20  
ctg3655□□□WAG-111H17  
ctg3656□□□WAG-82M8  
ctg3656□□□WAG-105L7  
ctg3657□□□WAG-54J10

ctg3657□□□WAG-102O7  
ctg3658□□□WAG-90N12  
ctg3658□□□WAG-102D21  
ctg3659□□□WAG-90M24  
ctg3659□□□WAG-114D2  
ctg366□□□WAG-125K8  
ctg366□ctg1482□□WAG-15I14  
ctg366□ctg1482□ctg2944□WAG-26H4  
ctg366□ctg1482□ctg2944□WAG-42O4  
ctg366□ctg1482□ctg2944□WAG-49B21  
ctg366□ctg1482□ctg2944□WAG-88K11  
ctg366□ctg1482□ctg4750□WAG-67F8  
ctg366□ctg1482□ctg4750□WAG-104H24  
ctg366□ctg1482□ctg5966□WAG-72L11  
ctg366□ctg1482□ctg5966□WAG-79N17  
ctg3660□□□WAG-6N1  
ctg3660□□□WAG-86L7  
ctg3661□□□WAG-78F4  
ctg3661□□□WAG-81N7  
ctg3662□□□WAG-28G10  
ctg3662□□□WAG-77L6  
ctg3663□□□WAG-75D4  
ctg3663□□□WAG-75K17  
ctg3664□□□WAG-59P3  
ctg3664□□□WAG-71I10  
ctg3665□□□WAG-59O14  
ctg3665□□□WAG-70E7  
ctg3666□□□WAG-70C10  
ctg3666□□□WAG-125J17  
ctg3667□□□WAG-67P15  
ctg3667□□□WAG-87N7  
ctg3668□□□WAG-31M18  
ctg3668□□□WAG-59G8  
ctg3669□□□WAG-57A10  
ctg3669□□□WAG-58A2  
ctg367□□□WAG-29L14  
ctg367□□□WAG-49O23  
ctg367□□□WAG-54J8  
ctg367□□□WAG-54P7  
ctg367□□□WAG-57E16  
ctg367□□□WAG-68O6  
ctg367□□□WAG-88G19  
ctg367□ctg1170□ctg1018□WAG-24O16  
ctg367□ctg1170□ctg1018□WAG-36B7  
ctg367□ctg1170□ctg1018□WAG-43F20  
ctg367□ctg1170□ctg1018□WAG-59I24  
ctg367□ctg1170□ctg1018□WAG-76L1  
ctg367□ctg1170□ctg1570□WAG-26O13  
ctg367□ctg1170□ctg1570□WAG-38B17  
ctg367□ctg1170□ctg1570□WAG-77O15  
ctg367□ctg1170□ctg1570□WAG-86I10  
ctg367□ctg1170□ctg1570□WAG-98P17  
ctg367□ctg1170□ctg1570□WAG-103A11  
ctg367□ctg2043□□WAG-58L10  
ctg367□ctg2043□□WAG-74O15  
ctg367□ctg2043□ctg1900□WAG-3I8

ctg367□ctg2043□ctg1900□WAG-25H19  
ctg367□ctg2043□ctg1900□WAG-26L7  
ctg367□ctg2043□ctg1900□WAG-114D9  
ctg367□ctg3262□□WAG-22L8  
ctg367□ctg3262□□WAG-22O5  
ctg367□ctg3262□□WAG-82E2  
ctg367□ctg3262□□WAG-92G18  
ctg367□ctg3262□ctg3814□WAG-62C3  
ctg367□ctg3262□ctg3814□WAG-101H2  
ctg367□ctg3262□ctg3814□WAG-118A13  
ctg3670□□□WAG-52E24  
ctg3670□□□WAG-117M1  
ctg3671□□□WAG-12O13  
ctg3671□□□WAG-51A6  
ctg3672□□□WAG-40B16  
ctg3672□□□WAG-45A6  
ctg3673□□□WAG-40I6  
ctg3673□□□WAG-82K19  
ctg3674□□□WAG-36A9  
ctg3674□□□WAG-92C23  
ctg3675□□□WAG-1D23  
ctg3675□□□WAG-14B13  
ctg3676□□□WAG-11C15  
ctg3676□□□WAG-124H24  
ctg3677□□□WAG-9K20  
ctg3677□□□WAG-40K3  
ctg3678□□□WAG-9B16  
ctg3678□□□WAG-24H23  
ctg3679□□□WAG-78C10  
ctg3679□□□WAG-128I23  
ctg368□□□WAG-31P15  
ctg368□ctg1238□ctg1443□WAG-70P3  
ctg368□ctg1238□ctg1443□WAG-78G4  
ctg368□ctg1238□ctg1443□WAG-103A6  
ctg368□ctg1238□ctg1443□WAG-104M20  
ctg368□ctg1238□ctg1443□WAG-127J6  
ctg368□ctg1238□ctg5200□WAG-15M16  
ctg368□ctg1238□ctg5200□WAG-108H2  
ctg368□ctg3611□ctg3794□WAG-63D20  
ctg368□ctg3611□ctg3794□WAG-110O22  
ctg368□ctg3639□□WAG-54P9  
ctg368□ctg3639□ctg4940□WAG-21I5  
ctg368□ctg3639□ctg4940□WAG-21J23  
ctg368□ctg4331□□WAG-49B15  
ctg368□ctg4331□ctg6169□WAG-56M11  
ctg368□ctg4331□ctg6169□WAG-61D17  
ctg3680□□□WAG-119M3  
ctg3680□□□WAG-125B17  
ctg3681□□□WAG-95E9  
ctg3681□□□WAG-95H21  
ctg3682□ctg6560□□WAG-2I14  
ctg3682□ctg6560□□WAG-2J15  
ctg3683□ctg6561□□WAG-2J9  
ctg3683□ctg6561□□WAG-2J13  
ctg3684□□□WAG-40P24  
ctg3684□□□WAG-130L10

ctg3685□□□WAG-5N6  
ctg3685□□□WAG-129E18  
ctg3686□□□WAG-39F21  
ctg3686□□□WAG-129B7  
ctg3687□□□WAG-106A12  
ctg3687□□□WAG-122A19  
ctg3688□□□WAG-119I22  
ctg3688□□□WAG-121A10  
ctg3689□□□WAG-94G14  
ctg3689□□□WAG-115P3  
ctg369□ctg1021□□WAG-54I21  
ctg369□ctg1021□ctg1176□WAG-28A21  
ctg369□ctg1021□ctg1176□WAG-100M12  
ctg369□ctg1021□ctg1176□WAG-105B12  
ctg369□ctg1021□ctg1176□WAG-116D9  
ctg369□ctg1021□ctg1176□WAG-123L8  
ctg369□ctg1021□ctg5660□WAG-90N13  
ctg369□ctg1021□ctg5660□WAG-126K1  
ctg3690□□□WAG-70I2  
ctg3690□□□WAG-104A1  
ctg3691□□□WAG-85P14  
ctg3691□□□WAG-93D17  
ctg3692□□□WAG-59B19  
ctg3692□□□WAG-92O19  
ctg3693□□□WAG-88P1  
ctg3693□□□WAG-109A21  
ctg3694□□□WAG-12A16  
ctg3694□□□WAG-70K20  
ctg3695□□□WAG-68M20  
ctg3695□□□WAG-117A3  
ctg3696□□□WAG-44B15  
ctg3696□□□WAG-76B16  
ctg3697□□□WAG-11P22  
ctg3697□□□WAG-39F1  
ctg3698□□□WAG-28N4  
ctg3698□□□WAG-100P20  
ctg3699□□□WAG-3O14  
ctg3699□□□WAG-28K15  
ctg37□□□WAG-75O3  
ctg37□ctg139□ctg190□WAG-42J12  
ctg37□ctg139□ctg190□WAG-48N14  
ctg37□ctg139□ctg190□WAG-58K23  
ctg37□ctg139□ctg190□WAG-67J6  
ctg37□ctg139□ctg190□WAG-75M10  
ctg37□ctg139□ctg190□WAG-87P3  
ctg37□ctg139□ctg190□WAG-120E14  
ctg37□ctg2205□ctg2810□WAG-11F12  
ctg37□ctg2205□ctg2810□WAG-14N10  
ctg37□ctg2205□ctg2810□WAG-117N13  
ctg37□ctg2205□ctg2810□WAG-119N14  
ctg370□ctg1423□□WAG-18A24  
ctg370□ctg1423□ctg1272□WAG-22K24  
ctg370□ctg1423□ctg1272□WAG-70J24  
ctg370□ctg1423□ctg1272□WAG-89D18  
ctg370□ctg1423□ctg1272□WAG-95P5  
ctg370□ctg1423□ctg4235□WAG-77O5



ctg370□ctg1423□ctg4235□WAG-86E6  
ctg370□ctg1423□ctg4235□WAG-105M10  
ctg370□ctg1423□ctg5608□WAG-33O16  
ctg370□ctg1423□ctg5608□WAG-93P16  
ctg3700□□□WAG-16N1  
ctg3700□□□WAG-127G19  
ctg3701□□□WAG-7N15  
ctg3701□□□WAG-100C14  
ctg3702□□□WAG-44H18  
ctg3702□□□WAG-126D9  
ctg3703□□□WAG-8M17  
ctg3703□□□WAG-115M8  
ctg3704□□□WAG-7F5  
ctg3704□□□WAG-114G12  
ctg3705□□□WAG-73J21  
ctg3705□□□WAG-100A18  
ctg3706□□□WAG-36D14  
ctg3706□□□WAG-79M22  
ctg3707□□□WAG-79C4  
ctg3707□□□WAG-91M20  
ctg3708□□□WAG-19H17  
ctg3708□□□WAG-68M10  
ctg3709□□□WAG-63G10  
ctg3709□□□WAG-126H24  
ctg371□ctg903□ctg747□WAG-9F18  
ctg371□ctg903□ctg747□WAG-10F19  
ctg371□ctg903□ctg747□WAG-29A18  
ctg371□ctg903□ctg747□WAG-50E14  
ctg371□ctg903□ctg747□WAG-66N6  
ctg371□ctg903□ctg747□WAG-103L21  
ctg371□ctg903□ctg747□WAG-113N22  
ctg371□ctg903□ctg747□WAG-121J4  
ctg3710□□□WAG-51P7  
ctg3710□□□WAG-85I3  
ctg3711□□□WAG-39N7  
ctg3711□□□WAG-84C22  
ctg3712□□□WAG-37J9  
ctg3712□□□WAG-40L11  
ctg3713□□□WAG-32D8  
ctg3713□□□WAG-47P3  
ctg3714□□□WAG-3G20  
ctg3714□□□WAG-30K5  
ctg3715□□□WAG-28B2  
ctg3715□□□WAG-48D4  
ctg3716□□□WAG-3E10  
ctg3716□□□WAG-20E11  
ctg3717□□□WAG-19K10  
ctg3717□□□WAG-90E9  
ctg3718□□□WAG-17J15  
ctg3718□□□WAG-47K16  
ctg3719□□□WAG-10E1  
ctg3719□□□WAG-78G16  
ctg372□ctg897□□WAG-123P11  
ctg372□ctg897□ctg738□WAG-28B1  
ctg372□ctg897□ctg738□WAG-68J2  
ctg372□ctg897□ctg738□WAG-72P17

ctg372□ctg897□ctg738□WAG-74D13  
ctg372□ctg897□ctg738□WAG-77C23  
ctg372□ctg897□ctg738□WAG-88N8  
ctg372□ctg897□ctg738□WAG-93J8  
ctg3720□□□WAG-6O4  
ctg3720□□□WAG-98E7  
ctg3721□□□WAG-126A23  
ctg3721□□□WAG-128P2  
ctg3722□□□WAG-22A7  
ctg3722□□□WAG-128E8  
ctg3723□□□WAG-51H13  
ctg3723□□□WAG-126G18  
ctg3724□□□WAG-64N3  
ctg3724□□□WAG-118O6  
ctg3725□□□WAG-4F19  
ctg3725□□□WAG-117P21  
ctg3726□□□WAG-64N19  
ctg3726□□□WAG-117K1  
ctg3727□□□WAG-84B5  
ctg3727□□□WAG-117J18  
ctg3728□□□WAG-94N12  
ctg3728□□□WAG-102I15  
ctg3729□□□WAG-97N2  
ctg3729□□□WAG-99H7  
ctg373□□□WAG-126H18  
ctg373□ctg1373□□WAG-29I23  
ctg373□ctg1373□□WAG-50E13  
ctg373□ctg1373□ctg1667□WAG-11M9  
ctg373□ctg1373□ctg1667□WAG-55J4  
ctg373□ctg1373□ctg1667□WAG-97P15  
ctg373□ctg1373□ctg1667□WAG-109N22  
ctg373□ctg1373□ctg1667□WAG-127P6  
ctg373□ctg1373□ctg1667□WAG-130N22  
ctg3730□□□WAG-87E4  
ctg3730□□□WAG-124B24  
ctg3731□□□WAG-85L22  
ctg3731□□□WAG-96H10  
ctg3732□□□WAG-51D19  
ctg3732□□□WAG-71K19  
ctg3733□□□WAG-67C6  
ctg3733□□□WAG-70L6  
ctg3734□□□WAG-9E5  
ctg3734□□□WAG-56E18  
ctg3735□□□WAG-48J17  
ctg3735□□□WAG-119L7  
ctg3736□□□WAG-C1  
ctg3736□□□WAG-43G9  
ctg3737□□□WAG-42P15  
ctg3737□□□WAG-76I7  
ctg3738□ctg6564□ctg6971□WAG-29L15  
ctg3738□ctg6564□ctg6971□WAG-130H4  
ctg3739□□□WAG-7E23  
ctg3739□□□WAG-29E22  
ctg374□ctg902□□WAG-22P15  
ctg374□ctg902□□WAG-56K2  
ctg374□ctg902□□WAG-94A24

ctg374□ctg902□ctg1679□WAG-41I21  
ctg374□ctg902□ctg1679□WAG-56G20  
ctg374□ctg902□ctg1679□WAG-91F23  
ctg374□ctg902□ctg1679□WAG-95C19  
ctg374□ctg902□ctg1679□WAG-96N13  
ctg374□ctg902□ctg1679□WAG-118P18  
ctg374□ctg902□ctg3412□WAG-20K6  
ctg374□ctg902□ctg3412□WAG-120K20  
ctg374□ctg902□ctg3412□WAG-129I18  
ctg3740□□□WAG-22L20  
ctg3740□□□WAG-68M19  
ctg3741□□□WAG-20N16  
ctg3741□□□WAG-88L19  
ctg3742□□□WAG-14D24  
ctg3742□□□WAG-58K8  
ctg3743□□□WAG-3C18  
ctg3743□□□WAG-3F14  
ctg3744□□□WAG-100N23  
ctg3744□□□WAG-128C17  
ctg3745□□□WAG-3O17  
ctg3745□□□WAG-126A6  
ctg3746□□□WAG-79H12  
ctg3746□□□WAG-97N14  
ctg3747□□□WAG-54A5  
ctg3747□□□WAG-75G15  
ctg3748□□□WAG-42G20  
ctg3748□□□WAG-66P5  
ctg3749□□□WAG-55K11  
ctg3749□□□WAG-116K1  
ctg375□□□WAG-46P24  
ctg375□ctg904□ctg948□WAG-65F3  
ctg375□ctg904□ctg948□WAG-69I3  
ctg375□ctg904□ctg948□WAG-113H17  
ctg375□ctg904□ctg948□WAG-122J9  
ctg375□ctg904□ctg948□WAG-125E13  
ctg375□ctg904□ctg948□WAG-129L7  
ctg3750□□□WAG-43N16  
ctg3750□□□WAG-71M2  
ctg3751□□□WAG-21B1  
ctg3751□□□WAG-104C15  
ctg3752□□□WAG-11G3  
ctg3752□□□WAG-89J24  
ctg3753□ctg6566□□WAG-56F6  
ctg3753□ctg6566□□WAG-96I12  
ctg3754□□□WAG-8M3  
ctg3754□□□WAG-119F4  
ctg3755□□□WAG-98D6  
ctg3755□□□WAG-118K19  
ctg3756□□□WAG-96J3  
ctg3756□□□WAG-107M13  
ctg3757□□□WAG-20J14  
ctg3757□□□WAG-99B5  
ctg3758□□□WAG-74C22  
ctg3758□□□WAG-98D10  
ctg3759□□□WAG-29O4  
ctg3759□□□WAG-79H6

ctg376□ctg907□ctg1295□WAG-25D22  
ctg376□ctg907□ctg1295□WAG-51F11  
ctg376□ctg907□ctg1295□WAG-69G3  
ctg376□ctg907□ctg1295□WAG-78H13  
ctg376□ctg907□ctg1295□WAG-87H2  
ctg376□ctg907□ctg1295□WAG-91J4  
ctg3760□□□WAG-4K17  
ctg3760□□□WAG-57E4  
ctg3761□□□WAG-43L21  
ctg3761□□□WAG-100K6  
ctg3762□□□WAG-30O2  
ctg3762□□□WAG-42E11  
ctg3763□□□WAG-34D19  
ctg3763□□□WAG-78J4  
ctg3764□□□WAG-19N6  
ctg3764□□□WAG-19P9  
ctg3765□□□WAG-8L14  
ctg3765□□□WAG-119K17  
ctg3766□□□WAG-115K16  
ctg3766□□□WAG-128E11  
ctg3767□□□WAG-95O10  
ctg3767□□□WAG-127L11  
ctg3768□□□WAG-16E18  
ctg3768□□□WAG-127A9  
ctg3769□□□WAG-69P8  
ctg3769□□□WAG-125O18  
ctg377□ctg1318□ctg1181□WAG-8E19  
ctg377□ctg1318□ctg1181□WAG-16I4  
ctg377□ctg1318□ctg1181□WAG-33J12  
ctg377□ctg1318□ctg1181□WAG-44G21  
ctg377□ctg1318□ctg1181□WAG-104C20  
ctg377□ctg1318□ctg1181□WAG-108D13  
ctg377□ctg1318□ctg1181□WAG-116B16  
ctg377□ctg1318□ctg1181□WAG-120P23  
ctg3770□□□WAG-44A24  
ctg3770□□□WAG-125J11  
ctg3771□□□WAG-84M5  
ctg3771□□□WAG-117H24  
ctg3772□□□WAG-67K14  
ctg3772□□□WAG-112N2  
ctg3773□□□WAG-95M1  
ctg3773□□□WAG-112A20  
ctg3774□□□WAG-60M17  
ctg3774□□□WAG-105M5  
ctg3775□□□WAG-85N21  
ctg3775□□□WAG-101F6  
ctg3776□□□WAG-8N19  
ctg3776□□□WAG-92I11  
ctg3777□□□WAG-27A24  
ctg3777□□□WAG-90C9  
ctg3778□□□WAG-30E1  
ctg3778□□□WAG-87N10  
ctg3779□□□WAG-16C11  
ctg3779□□□WAG-80A23  
ctg378□□□WAG-98L6  
ctg378□ctg1533□□WAG-7I14

ctg378□ctg1533□□WAG-52I2  
ctg378□ctg1533□ctg1378□WAG-4K24  
ctg378□ctg1533□ctg1378□WAG-22N24  
ctg378□ctg1533□ctg1378□WAG-69K14  
ctg378□ctg1533□ctg1378□WAG-114F24  
ctg378□ctg1533□ctg4159□WAG-67N3  
ctg378□ctg1533□ctg4159□WAG-129C5  
ctg3780□□□WAG-17L15  
ctg3780□□□WAG-78L21  
ctg3781□□□WAG-37G12  
ctg3781□□□WAG-58N7  
ctg3782□□□WAG-54M2  
ctg3782□□□WAG-55O19  
ctg3783□□□WAG-30J16  
ctg3783□□□WAG-53P11  
ctg3784□□□WAG-7M6  
ctg3784□□□WAG-46C16  
ctg3785□□□WAG-23K13  
ctg3785□□□WAG-45I6  
ctg3786□□□WAG-42J17  
ctg3786□□□WAG-82G1  
ctg3787□□□WAG-33K18  
ctg3787□□□WAG-42I5  
ctg3788□□□WAG-42A3  
ctg3788□□□WAG-110A20  
ctg3789□□□WAG-10D7  
ctg3789□□□WAG-36M4  
ctg379□□□WAG-G10  
ctg379□□□WAG-117F15  
ctg379□ctg1085□ctg2021□WAG-53B23  
ctg379□ctg1085□ctg2021□WAG-55I16  
ctg379□ctg1085□ctg2021□WAG-74G14  
ctg379□ctg1085□ctg2021□WAG-104B4  
ctg379□ctg1085□ctg2140□WAG-14M17  
ctg379□ctg1085□ctg2140□WAG-19I11  
ctg379□ctg1085□ctg2140□WAG-60H7  
ctg379□ctg1085□ctg2140□WAG-93I20  
ctg379□ctg1085□ctg2140□WAG-111B13  
ctg379□ctg1085□ctg2140□WAG-111B14  
ctg379□ctg2451□ctg2362□WAG-20M22  
ctg379□ctg2451□ctg2362□WAG-74K17  
ctg379□ctg2451□ctg2362□WAG-109K7  
ctg379□ctg2451□ctg2362□WAG-110F2  
ctg379□ctg2451□ctg2362□WAG-116N10  
ctg379□ctg2521□□WAG-1I22  
ctg379□ctg2521□ctg2450□WAG-41D8  
ctg379□ctg2521□ctg2450□WAG-71J9  
ctg379□ctg2521□ctg2450□WAG-100G5  
ctg379□ctg2521□ctg2450□WAG-115K18  
ctg379□ctg2912□ctg3413□WAG-64P8  
ctg379□ctg2912□ctg3413□WAG-78H15  
ctg379□ctg2912□ctg3413□WAG-99L11  
ctg379□ctg2912□ctg3413□WAG-117H22  
ctg379□ctg5278□ctg6108□WAG-56F12  
ctg379□ctg5278□ctg6108□WAG-130D14  
ctg3790□□□WAG-34A21

ctg3790□□□WAG-94B4  
ctg3791□□□WAG-26H8  
ctg3791□□□WAG-28K8  
ctg3792□□□WAG-1D18  
ctg3792□□□WAG-26C23  
ctg3793□□□WAG-21B8  
ctg3793□□□WAG-46A14  
ctg3794□□□WAG-19L16  
ctg3794□□□WAG-65F5  
ctg3795□□□WAG-17H24  
ctg3795□□□WAG-111I7  
ctg3796□□□WAG-12P23  
ctg3796□□□WAG-47G24  
ctg3797□□□WAG-105F24  
ctg3797□□□WAG-108C13  
ctg3798□□□WAG-79K22  
ctg3798□□□WAG-98G6  
ctg3799□□□WAG-9D19  
ctg3799□□□WAG-69C16  
ctg38□□□WAG-9A6  
ctg38□□□WAG-15P24  
ctg38□□□WAG-91J20  
ctg38□□□WAG-94A15  
ctg38□□□WAG-103H5  
ctg38□ctg296□□WAG-70K14  
ctg38□ctg296□ctg227□WAG-6M15  
ctg38□ctg296□ctg227□WAG-14D17  
ctg38□ctg296□ctg227□WAG-20J8  
ctg38□ctg296□ctg227□WAG-57H18  
ctg38□ctg296□ctg227□WAG-76B7  
ctg38□ctg296□ctg227□WAG-79K14  
ctg38□ctg296□ctg227□WAG-80C12  
ctg38□ctg296□ctg227□WAG-85J14  
ctg38□ctg296□ctg227□WAG-85O13  
ctg38□ctg296□ctg227□WAG-100D18  
ctg38□ctg296□ctg227□WAG-120L17  
ctg38□ctg296□ctg227□WAG-124K2  
ctg38□ctg296□ctg227□WAG-128K4  
ctg38□ctg296□ctg2368□WAG-9I23  
ctg38□ctg296□ctg2368□WAG-49D6  
ctg38□ctg296□ctg2368□WAG-50L18  
ctg38□ctg3202□□WAG-21K11  
ctg38□ctg3202□ctg3848□WAG-11C3  
ctg38□ctg3202□ctg3848□WAG-12C14  
ctg38□ctg3202□ctg3848□WAG-42O21  
ctg38□ctg3202□ctg3848□WAG-46C11  
ctg38□ctg3202□ctg3848□WAG-81A3  
ctg38□ctg5871□□WAG-43I7  
ctg38□ctg5871□□WAG-54N15  
ctg38□ctg818□□WAG-68N7  
ctg38□ctg818□□WAG-91M24  
ctg38□ctg818□□WAG-111B21  
ctg38□ctg818□□WAG-119I17  
ctg38□ctg818□ctg1153□WAG-19E20  
ctg38□ctg818□ctg1153□WAG-34F22  
ctg38□ctg818□ctg1153□WAG-76H14

ctg38□ctg818□ctg1153□WAG-88I14  
ctg38□ctg818□ctg1153□WAG-116B18  
ctg38□ctg818□ctg1153□WAG-120G7  
ctg380□ctg1287□□WAG-31C11  
ctg380□ctg1287□□WAG-91H7  
ctg380□ctg1287□ctg1870□WAG-91B13  
ctg380□ctg1287□ctg1870□WAG-109A12  
ctg380□ctg1287□ctg1870□WAG-119O2  
ctg380□ctg1287□ctg2383□WAG-38H22  
ctg380□ctg1287□ctg2383□WAG-79B23  
ctg380□ctg1287□ctg2383□WAG-91M3  
ctg380□ctg1287□ctg2383□WAG-96N5  
ctg380□ctg1287□ctg2383□WAG-107H21  
ctg3800□□□WAG-43N10  
ctg3800□□□WAG-55C8  
ctg3801□□□WAG-10L12  
ctg3801□□□WAG-18M5  
ctg3802□□□WAG-17F21  
ctg3802□□□WAG-65G8  
ctg3803□□□WAG-118P17  
ctg3803□□□WAG-126B6  
ctg3804□□□WAG-9F20  
ctg3804□□□WAG-123K11  
ctg3805□□□WAG-66E14  
ctg3805□□□WAG-112P3  
ctg3806□□□WAG-99C2  
ctg3806□□□WAG-106J16  
ctg3807□□□WAG-12I5  
ctg3807□□□WAG-98D12  
ctg3808□□□WAG-32F13  
ctg3808□□□WAG-75N14  
ctg3809□□□WAG-41J12  
ctg3809□□□WAG-63H10  
ctg381□□□WAG-27O18  
ctg381□ctg1118□□WAG-77M21  
ctg381□ctg1118□□WAG-112M15  
ctg381□ctg1118□ctg1299□WAG-5A18  
ctg381□ctg1118□ctg1299□WAG-24H7  
ctg381□ctg1118□ctg1299□WAG-33G14  
ctg381□ctg1118□ctg1299□WAG-46D23  
ctg381□ctg1118□ctg1299□WAG-59C22  
ctg381□ctg1118□ctg1299□WAG-69H20  
ctg381□ctg1118□ctg1299□WAG-98L24  
ctg381□ctg1118□ctg1299□WAG-118H20  
ctg381□ctg1118□ctg1299□WAG-128J1  
ctg381□ctg6528□□WAG-28H21  
ctg381□ctg6528□□WAG-116I19  
ctg3810□□□WAG-61E10  
ctg3810□□□WAG-63B11  
ctg3811□□□WAG-56H8  
ctg3811□□□WAG-75B6  
ctg3812□□□WAG-56H7  
ctg3812□□□WAG-124K1  
ctg3813□□□WAG-46C10  
ctg3813□□□WAG-107B13  
ctg3814□□□WAG-45O6

ctg3814□□□WAG-55O16  
ctg3815□□□WAG-44C21  
ctg3815□□□WAG-75L24  
ctg3816□□□WAG-38N1  
ctg3816□□□WAG-40M24  
ctg3817□□□WAG-11D23  
ctg3817□□□WAG-36H6  
ctg3818□□□WAG-G24  
ctg3818□□□WAG-33J4  
ctg3819□□□WAG-30C19  
ctg3819□□□WAG-128F15  
ctg382□ctg1052□ctg4483□WAG-123G7  
ctg382□ctg1052□ctg4483□WAG-129I1  
ctg382□ctg1052□ctg890□WAG-69C8  
ctg382□ctg1052□ctg890□WAG-78C19  
ctg382□ctg1052□ctg890□WAG-94G7  
ctg382□ctg1052□ctg890□WAG-104D22  
ctg382□ctg1052□ctg890□WAG-129D17  
ctg382□ctg4003□ctg5790□WAG-74I11  
ctg382□ctg4003□ctg5790□WAG-97L2  
ctg382□ctg4003□ctg6392□WAG-57M18  
ctg382□ctg4003□ctg6392□WAG-84P21  
ctg3820□□□WAG-10M20  
ctg3820□□□WAG-28L4  
ctg3821□□□WAG-12F3  
ctg3821□□□WAG-26J10  
ctg3822□□□WAG-21N23  
ctg3822□□□WAG-121O3  
ctg3823□□□WAG-17P13  
ctg3823□□□WAG-27D20  
ctg3824□□□WAG-17M17  
ctg3824□□□WAG-53M12  
ctg3825□□□WAG-16J14  
ctg3825□□□WAG-120B9  
ctg3826□□□WAG-6P19  
ctg3826□□□WAG-120I5  
ctg3827□□□WAG-115N11  
ctg3827□□□WAG-116J2  
ctg3828□□□WAG-35A5  
ctg3828□□□WAG-108P17  
ctg3829□□□WAG-76D16  
ctg3829□□□WAG-99O12  
ctg383□ctg1057□ctg1230□WAG-10E4  
ctg383□ctg1057□ctg1230□WAG-19B23  
ctg383□ctg1057□ctg1230□WAG-35P8  
ctg383□ctg1057□ctg1230□WAG-106B13  
ctg383□ctg1057□ctg1230□WAG-111M14  
ctg383□ctg1057□ctg1230□WAG-122O23  
ctg383□ctg2042□ctg1899□WAG-40D1  
ctg383□ctg2042□ctg1899□WAG-70A12  
ctg383□ctg2042□ctg1899□WAG-73E7  
ctg383□ctg2042□ctg1899□WAG-100P14  
ctg3830□□□WAG-60O19  
ctg3830□□□WAG-94D6  
ctg3831□□□WAG-80B8  
ctg3831□□□WAG-92O2



ctg3832□□□WAG-34E15  
ctg3832□□□WAG-80C23  
ctg3833□□□WAG-12N24  
ctg3833□□□WAG-82H13  
ctg3834□□□WAG-48K13  
ctg3834□□□WAG-88D2  
ctg3835□□□WAG-2G13  
ctg3835□□□WAG-47I6  
ctg3836□□□WAG-45C18  
ctg3836□□□WAG-130B17  
ctg3837□□□WAG-31I15  
ctg3837□□□WAG-121I3  
ctg3838□□□WAG-42O20  
ctg3838□□□WAG-119H20  
ctg3839□□□WAG-31L13  
ctg3839□□□WAG-118A4  
ctg384□□□WAG-30M21  
ctg384□□□WAG-108I11  
ctg384□ctg1093□□WAG-3A6  
ctg384□ctg1093□□WAG-95L21  
ctg384□ctg1093□ctg2305□WAG-9I16  
ctg384□ctg1093□ctg2305□WAG-53O17  
ctg384□ctg1093□ctg2305□WAG-56G2  
ctg384□ctg1093□ctg2305□WAG-59B8  
ctg384□ctg1093□ctg2305□WAG-100B20  
ctg384□ctg1093□ctg2799□WAG-70B13  
ctg384□ctg1093□ctg2799□WAG-89H18  
ctg384□ctg1093□ctg2799□WAG-98F9  
ctg3840□□□WAG-18M14  
ctg3840□□□WAG-110G6  
ctg3841□□□WAG-107P1  
ctg3841□□□WAG-112I2  
ctg3842□□□WAG-93E11  
ctg3842□□□WAG-106O24  
ctg3843□□□WAG-61F6  
ctg3843□□□WAG-106G1  
ctg3844□□□WAG-28A10  
ctg3844□□□WAG-101I7  
ctg3845□□□WAG-51E20  
ctg3845□□□WAG-101I5  
ctg3846□□□WAG-30F18  
ctg3846□□□WAG-97E16  
ctg3847□□□WAG-16H11  
ctg3847□□□WAG-89I23  
ctg3848□□□WAG-40M19  
ctg3848□□□WAG-89C1  
ctg3849□□□WAG-88F15  
ctg3849□□□WAG-101G23  
ctg385□ctg920□ctg763□WAG-35L17  
ctg385□ctg920□ctg763□WAG-67M21  
ctg385□ctg920□ctg763□WAG-79N24  
ctg385□ctg920□ctg763□WAG-80G9  
ctg385□ctg920□ctg763□WAG-91L2  
ctg385□ctg920□ctg763□WAG-119N9  
ctg3850□□□WAG-73K18  
ctg3850□□□WAG-83K8

ctg3851□□□WAG-82M14  
ctg3851□□□WAG-103M18  
ctg3852□□□WAG-63E22  
ctg3852□□□WAG-87K4  
ctg3853□□□WAG-25H11  
ctg3853□□□WAG-59M22  
ctg3854□□□WAG-57D12  
ctg3854□□□WAG-107E15  
ctg3855□□□WAG-56E23  
ctg3855□□□WAG-57E23  
ctg3856□□□WAG-29B10  
ctg3856□□□WAG-52O24  
ctg3857□□□WAG-44L8  
ctg3857□□□WAG-60M11  
ctg3858□□□WAG-4G20  
ctg3858□□□WAG-44D5  
ctg3859□□□WAG-40E24  
ctg3859□□□WAG-73J7  
ctg386□□□WAG-3D6  
ctg386□□□WAG-3E8  
ctg386□ctg1060□ctg902□WAG-73N24  
ctg386□ctg1060□ctg902□WAG-81P15  
ctg386□ctg1060□ctg902□WAG-91K22  
ctg386□ctg1060□ctg902□WAG-121P15  
ctg386□ctg1060□ctg902□WAG-129I13  
ctg3860□□□WAG-38K22  
ctg3860□□□WAG-54L1  
ctg3861□□□WAG-30C5  
ctg3861□□□WAG-36A7  
ctg3862□□□WAG-25N6  
ctg3862□□□WAG-98B24  
ctg3863□□□WAG-14B24  
ctg3863□□□WAG-34M1  
ctg3864□□□WAG-8A13  
ctg3864□□□WAG-125F10  
ctg3865□□□WAG-54K24  
ctg3865□□□WAG-111B10  
ctg3866□□□WAG-2G22  
ctg3866□□□WAG-85B16  
ctg3867□□□WAG-48P11  
ctg3867□□□WAG-81M13  
ctg3868□□□WAG-76P23  
ctg3868□□□WAG-130O19  
ctg3869□□□WAG-27E15  
ctg3869□□□WAG-124C24  
ctg387□□□WAG-27H12  
ctg387□ctg1096□ctg937□WAG-1G20  
ctg387□ctg1096□ctg937□WAG-23A10  
ctg387□ctg1096□ctg937□WAG-48I22  
ctg387□ctg1096□ctg937□WAG-74G9  
ctg387□ctg1096□ctg937□WAG-85K9  
ctg387□ctg1096□ctg937□WAG-100F15  
ctg3870□□□WAG-27J18  
ctg3870□□□WAG-115N20  
ctg3871□□□WAG-104I3  
ctg3871□□□WAG-114D3

ctg3872□□□WAG-13M6  
ctg3872□□□WAG-96D7  
ctg3873□□□WAG-90G24  
ctg3873□□□WAG-98J4  
ctg3874□□□WAG-70D22  
ctg3874□□□WAG-80N10  
ctg3875□□□WAG-77M18  
ctg3875□□□WAG-122H4  
ctg3876□□□WAG-65M2  
ctg3876□□□WAG-90B21  
ctg3877□□□WAG-23P23  
ctg3877□□□WAG-59L22  
ctg3878□□□WAG-36B23  
ctg3878□□□WAG-49B11  
ctg3879□□□WAG-45D19  
ctg3879□□□WAG-87O24  
ctg388□□□WAG-88O9  
ctg388□ctg1072□ctg919□WAG-22G16  
ctg388□ctg1072□ctg919□WAG-55J18  
ctg388□ctg1072□ctg919□WAG-66I8  
ctg388□ctg1072□ctg919□WAG-82D14  
ctg388□ctg1072□ctg919□WAG-119G15  
ctg388□ctg2104□□WAG-10F15  
ctg388□ctg2104□□WAG-81B3  
ctg388□ctg2104□ctg2133□WAG-2A4  
ctg388□ctg2104□ctg2133□WAG-74M11  
ctg388□ctg2104□ctg2133□WAG-82L10  
ctg388□ctg2104□ctg2133□WAG-111M2  
ctg388□ctg5423□ctg6440□WAG-67K15  
ctg388□ctg5423□ctg6440□WAG-125K16  
ctg388□ctg6070□□WAG-5K14  
ctg388□ctg6070□□WAG-96I5  
ctg388□ctg6289□□WAG-2N6  
ctg388□ctg6289□□WAG-104O24  
ctg3880□□□WAG-33P4  
ctg3880□□□WAG-33P5  
ctg3881□□□WAG-25J8  
ctg3881□□□WAG-76A2  
ctg3882□□□WAG-10M23  
ctg3882□□□WAG-24H15  
ctg3883□□□WAG-23F23  
ctg3883□□□WAG-125O1  
ctg3884□□□WAG-18K19  
ctg3884□□□WAG-84A4  
ctg3885□□□WAG-11P2  
ctg3885□□□WAG-59G2  
ctg3886□□□WAG-11G4  
ctg3886□□□WAG-18H19  
ctg3887□□□WAG-53H21  
ctg3887□□□WAG-53I22  
ctg3888□□□WAG-32G2  
ctg3888□□□WAG-35L4  
ctg3889□□□WAG-17L1  
ctg3889□□□WAG-19M3  
ctg389□ctg1230□ctg1368□WAG-1B5  
ctg389□ctg1230□ctg1368□WAG-48P17

ctg389□ctg1230□ctg1368□WAG-89C10  
ctg389□ctg1230□ctg1368□WAG-98K5  
ctg389□ctg1230□ctg1368□WAG-111K11  
ctg389□ctg1230□ctg1368□WAG-130P9  
ctg389□ctg1230□ctg4063□WAG-29E11  
ctg389□ctg1230□ctg4063□WAG-129J19  
ctg3890□□□WAG-102G23  
ctg3890□□□WAG-122K21  
ctg3891□□□WAG-101N10  
ctg3891□□□WAG-120F11  
ctg3892□□□WAG-47C11  
ctg3892□□□WAG-118A2  
ctg3893□□□WAG-84D7  
ctg3893□□□WAG-114C12  
ctg3894□□□WAG-78L2  
ctg3894□□□WAG-111H13  
ctg3895□□□WAG-12A15  
ctg3895□□□WAG-106M1  
ctg3896□□□WAG-73C19  
ctg3896□□□WAG-105H20  
ctg3897□□□WAG-43M22  
ctg3897□□□WAG-98A22  
ctg3898□□□WAG-95F5  
ctg3898□□□WAG-96J10  
ctg3899□□□WAG-88M12  
ctg3899□□□WAG-104N1  
ctg39□□□WAG-20P21  
ctg39□□□WAG-84K23  
ctg39□□□WAG-117E7  
ctg39□ctg1286□ctg1133□WAG-8A21  
ctg39□ctg1286□ctg1133□WAG-43F2  
ctg39□ctg1286□ctg1133□WAG-44C1  
ctg39□ctg1286□ctg1133□WAG-44D20  
ctg39□ctg1286□ctg1133□WAG-107K16  
ctg39□ctg207□□WAG-68C22  
ctg39□ctg207□ctg281□WAG-21H1  
ctg39□ctg207□ctg281□WAG-23G10  
ctg39□ctg207□ctg281□WAG-24I12  
ctg39□ctg207□ctg281□WAG-32A7  
ctg39□ctg207□ctg281□WAG-45O13  
ctg39□ctg207□ctg281□WAG-47M19  
ctg39□ctg207□ctg281□WAG-66I3  
ctg39□ctg207□ctg281□WAG-69N20  
ctg39□ctg207□ctg281□WAG-83E24  
ctg39□ctg207□ctg281□WAG-93P6  
ctg39□ctg207□ctg281□WAG-110B10  
ctg39□ctg207□ctg281□WAG-120J10  
ctg39□ctg207□ctg281□WAG-121O7  
ctg39□ctg207□ctg281□WAG-125H24  
ctg39□ctg2601□□WAG-63J22  
ctg39□ctg2601□□WAG-107O8  
ctg39□ctg2601□ctg3265□WAG-14J9  
ctg39□ctg2601□ctg3265□WAG-52N15  
ctg39□ctg2601□ctg3265□WAG-58O4  
ctg39□ctg3723□□WAG-53I16  
ctg39□ctg3723□□WAG-61P17

ctg39□ctg3723□□WAG-69E8  
ctg39□ctg3723□□WAG-77E22  
ctg39□ctg3723□ctg5123□WAG-12K20  
ctg39□ctg3723□ctg5123□WAG-49C14  
ctg39□ctg3723□ctg5123□WAG-118D22  
ctg39□ctg5279□ctg6109□WAG-53F12  
ctg39□ctg5279□ctg6109□WAG-122G15  
ctg390□□□WAG-30N3  
ctg390□ctg1086□□WAG-28A20  
ctg390□ctg1086□ctg1423□WAG-66L10  
ctg390□ctg1086□ctg1423□WAG-70G23  
ctg390□ctg1086□ctg1423□WAG-89G2  
ctg390□ctg1086□ctg1423□WAG-93N15  
ctg390□ctg1086□ctg1423□WAG-128B14  
ctg390□ctg1086□ctg1423□WAG-130B2  
ctg3900□□□WAG-5J7  
ctg3900□□□WAG-76F16  
ctg3901□□□WAG-72B14  
ctg3901□□□WAG-99E4  
ctg3902□□□WAG-20D12  
ctg3902□□□WAG-65K5  
ctg3903□□□WAG-60G4  
ctg3903□□□WAG-61G18  
ctg3904□□□WAG-51J9  
ctg3904□□□WAG-59P23  
ctg3905□□□WAG-40L15  
ctg3905□□□WAG-128F5  
ctg3906□□□WAG-14G12  
ctg3906□□□WAG-47O16  
ctg3907□□□WAG-10A1  
ctg3907□□□WAG-46F12  
ctg3908□□□WAG-7B17  
ctg3908□□□WAG-83I2  
ctg3909□□□WAG-49N19  
ctg3909□□□WAG-54D8  
ctg391□□□WAG-1G10  
ctg391□□□WAG-128I22  
ctg391□ctg1288□□WAG-127M7  
ctg391□ctg1288□ctg1442□WAG-19J2  
ctg391□ctg1288□ctg1442□WAG-50F24  
ctg391□ctg1288□ctg1442□WAG-60B21  
ctg391□ctg1288□ctg1442□WAG-64K15  
ctg391□ctg1288□ctg1442□WAG-72G5  
ctg391□ctg1288□ctg1442□WAG-80P14  
ctg391□ctg1288□ctg1442□WAG-89B19  
ctg391□ctg1288□ctg1442□WAG-118P1  
ctg3910□□□WAG-116H4  
ctg3910□□□WAG-126A9  
ctg3911□□□WAG-58K17  
ctg3911□□□WAG-124M2  
ctg3912□□□WAG-104P18  
ctg3912□□□WAG-124D15  
ctg3913□□□WAG-105A17  
ctg3913□□□WAG-123N12  
ctg3914□□□WAG-98I15  
ctg3914□□□WAG-121M8

ctg3915□□□WAG-73J16  
ctg3915□□□WAG-121K5  
ctg3916□□□WAG-119G18  
ctg3916□□□WAG-130E9  
ctg3917□□□WAG-61M11  
ctg3917□□□WAG-118H15  
ctg3918□□□WAG-77G7  
ctg3918□□□WAG-116G7  
ctg3919□□□WAG-54M7  
ctg3919□□□WAG-110M16  
ctg392□□□WAG-41B16  
ctg392□□□WAG-101I4  
ctg392□ctg1087□□WAG-29M12  
ctg392□ctg1087□□WAG-40M18  
ctg392□ctg1087□ctg1209□WAG-68N5  
ctg392□ctg1087□ctg1209□WAG-70F23  
ctg392□ctg1087□ctg1209□WAG-79J14  
ctg392□ctg1087□ctg1209□WAG-89D21  
ctg392□ctg1087□ctg1209□WAG-121H9  
ctg392□ctg1087□ctg1209□WAG-127K3  
ctg3920□□□WAG-2I17  
ctg3920□□□WAG-109N17  
ctg3921□□□WAG-61H9  
ctg3921□□□WAG-104K17  
ctg3922□□□WAG-78P13  
ctg3922□□□WAG-91P16  
ctg3923□□□WAG-87J8  
ctg3923□□□WAG-126E22  
ctg3924□□□WAG-34I7  
ctg3924□□□WAG-81M10  
ctg3925□□□WAG-3D23  
ctg3925□□□WAG-74H5  
ctg3926□□□WAG-3C7  
ctg3926□□□WAG-72C19  
ctg3927□□□WAG-33O14  
ctg3927□□□WAG-62M3  
ctg3928□□□WAG-54F22  
ctg3928□□□WAG-62F23  
ctg3929□□□WAG-54F6  
ctg3929□□□WAG-82I4  
ctg393□□□WAG-82N5  
ctg393□ctg1289□□WAG-100K21  
ctg393□ctg1289□ctg1137□WAG-9G17  
ctg393□ctg1289□ctg1137□WAG-28N12  
ctg393□ctg1289□ctg1137□WAG-32K1  
ctg393□ctg1289□ctg1137□WAG-42H2  
ctg393□ctg1289□ctg1137□WAG-46E23  
ctg393□ctg1289□ctg1137□WAG-55C13  
ctg393□ctg1289□ctg1137□WAG-59M21  
ctg393□ctg1289□ctg1137□WAG-78G19  
ctg393□ctg1289□ctg1137□WAG-87E9  
ctg393□ctg1289□ctg1137□WAG-97M7  
ctg393□ctg1289□ctg1137□WAG-108P5  
ctg393□ctg1289□ctg5641□WAG-66B9  
ctg393□ctg1289□ctg5641□WAG-74D17  
ctg393□ctg4282□□WAG-85E19

ctg393□ctg4282□□WAG-95O21  
ctg393□ctg4282□ctg4578□WAG-11H23  
ctg393□ctg4282□ctg4578□WAG-111M18  
ctg393□ctg4282□ctg4578□WAG-116O4  
ctg393□ctg4754□ctg4958□WAG-74D16  
ctg393□ctg4754□ctg4958□WAG-104C8  
ctg3930□□□WAG-8L12  
ctg3930□□□WAG-53G7  
ctg3931□□□WAG-49H6  
ctg3931□□□WAG-79G5  
ctg3932□□□WAG-40F7  
ctg3932□□□WAG-57C1  
ctg3933□□□WAG-34C24  
ctg3933□□□WAG-107F8  
ctg3934□□□WAG-28D18  
ctg3934□□□WAG-75A15  
ctg3935□□□WAG-21F17  
ctg3935□□□WAG-52C23  
ctg3936□□□WAG-14O18  
ctg3936□□□WAG-16B2  
ctg3937□□□WAG-14E22  
ctg3937□□□WAG-35F21  
ctg3938□□□WAG-11M24  
ctg3938□□□WAG-14I5  
ctg3939□□□WAG-9A10  
ctg3939□□□WAG-96P12  
ctg394□□□WAG-63E11  
ctg394□□□WAG-70B24  
ctg394□□□WAG-121M15  
ctg394□ctg4095□□WAG-13B9  
ctg394□ctg4095□□WAG-67B18  
ctg394□ctg4095□ctg5655□WAG-62B23  
ctg394□ctg4095□ctg5655□WAG-111C13  
ctg394□ctg4726□□WAG-56E22  
ctg394□ctg4726□□WAG-65P19  
ctg394□ctg4726□□WAG-89E18  
ctg394□ctg934□ctg785□WAG-37A22  
ctg394□ctg934□ctg785□WAG-79E2  
ctg394□ctg934□ctg785□WAG-92N14  
ctg394□ctg934□ctg785□WAG-122F19  
ctg394□ctg934□ctg785□WAG-124J9  
ctg394□ctg934□ctg785□WAG-127N17  
ctg3940□□□WAG-69A22  
ctg3940□□□WAG-96M19  
ctg3941□□□WAG-69O23  
ctg3941□□□WAG-129B14  
ctg3942□□□WAG-114A8  
ctg3942□□□WAG-119N13  
ctg3943□□□WAG-51K12  
ctg3943□□□WAG-116E24  
ctg3944□□□WAG-102C11  
ctg3944□□□WAG-112N4  
ctg3945□□□WAG-72A19  
ctg3945□□□WAG-93K5  
ctg3946□□□WAG-1F10  
ctg3946□□□WAG-55K12

ctg3947□□□WAG-52I8  
ctg3947□□□WAG-102K9  
ctg3948□□□WAG-34K24  
ctg3948□□□WAG-47K6  
ctg3949□□□WAG-18D19  
ctg3949□□□WAG-39J14  
ctg395□ctg1137□□WAG-122N19  
ctg395□ctg1137□ctg1264□WAG-11C1  
ctg395□ctg1137□ctg1264□WAG-49E9  
ctg395□ctg1137□ctg1264□WAG-73M14  
ctg395□ctg1137□ctg1264□WAG-97C15  
ctg395□ctg1137□ctg1264□WAG-122K24  
ctg395□ctg1137□ctg1264□WAG-125F13  
ctg395□ctg4050□□WAG-123M7  
ctg395□ctg4050□ctg5973□WAG-3O15  
ctg395□ctg4050□ctg5973□WAG-57K9  
ctg3950□□□WAG-33B12  
ctg3950□□□WAG-127B10  
ctg3951□□□WAG-20J13  
ctg3951□□□WAG-57N2  
ctg3952□□□WAG-3N16  
ctg3952□□□WAG-19N7  
ctg3953□□□WAG-16O6  
ctg3953□□□WAG-53D12  
ctg3954□□□WAG-12O4  
ctg3954□□□WAG-34M5  
ctg3955□□□WAG-8M9  
ctg3955□□□WAG-17D1  
ctg3956□□□WAG-43J23  
ctg3956□□□WAG-129N11  
ctg3957□□□WAG-98O10  
ctg3957□□□WAG-109D18  
ctg3958□ctg6572□□WAG-4C11  
ctg3958□ctg6572□□WAG-93H17  
ctg3959□ctg6573□□WAG-35J22  
ctg3959□ctg6573□□WAG-84H6  
ctg396□□□WAG-94G1  
ctg396□□□WAG-112D15  
ctg396□ctg1555□□WAG-14P17  
ctg396□ctg1555□□WAG-109K4  
ctg396□ctg1555□ctg2415□WAG-74K3  
ctg396□ctg1555□ctg2415□WAG-97P9  
ctg396□ctg1555□ctg2415□WAG-104J19  
ctg396□ctg1555□ctg4799□WAG-4J14  
ctg396□ctg1555□ctg4799□WAG-110E12  
ctg396□ctg1555□ctg6756□WAG-48P4  
ctg396□ctg1555□ctg6756□WAG-52A6  
ctg396□ctg5597□ctg6765□WAG-29N2  
ctg396□ctg5597□ctg6765□WAG-40J8  
ctg3960□ctg6574□□WAG-33H3  
ctg3960□ctg6574□□WAG-94E7  
ctg3961□□□WAG-1B22  
ctg3961□□□WAG-2O3  
ctg3962□□□WAG-2K15  
ctg3962□□□WAG-2M20  
ctg3963□□□WAG-121I19



ctg3963□□□WAG-126E2  
ctg3964□□□WAG-85E10  
ctg3964□□□WAG-124K7  
ctg3965□□□WAG-113N4  
ctg3965□□□WAG-117B17  
ctg3966□□□WAG-4F14  
ctg3966□□□WAG-105F6  
ctg3967□□□WAG-58F19  
ctg3967□□□WAG-102I9  
ctg3968□□□WAG-78D16  
ctg3968□□□WAG-99E15  
ctg3969□□□WAG-82L20  
ctg3969□□□WAG-95H8  
ctg397□ctg2467□ctg2388□WAG-59M15  
ctg397□ctg2467□ctg2388□WAG-71O10  
ctg397□ctg2467□ctg2388□WAG-75D11  
ctg397□ctg941□□WAG-3G17  
ctg397□ctg941□□WAG-53C2  
ctg397□ctg941□□WAG-101H18  
ctg397□ctg941□ctg1672□WAG-44A9  
ctg397□ctg941□ctg1672□WAG-62B5  
ctg397□ctg941□ctg1672□WAG-68G2  
ctg397□ctg941□ctg1672□WAG-86M24  
ctg397□ctg941□ctg1672□WAG-101P17  
ctg397□ctg941□ctg1672□WAG-110F24  
ctg397□ctg941□ctg1672□WAG-118D15  
ctg397□ctg941□ctg1672□WAG-127P5  
ctg397□ctg941□ctg3357□WAG-46E19  
ctg397□ctg941□ctg3357□WAG-69K19  
ctg397□ctg941□ctg3357□WAG-117E9  
ctg397□ctg941□ctg3357□WAG-125G20  
ctg397□ctg941□ctg3844□WAG-31N12  
ctg397□ctg941□ctg3844□WAG-49E1  
ctg397□ctg941□ctg3844□WAG-72H14  
ctg3970□□□WAG-73G1  
ctg3970□□□WAG-93P17  
ctg3971□□□WAG-60K24  
ctg3971□□□WAG-78C3  
ctg3972□□□WAG-53G3  
ctg3972□□□WAG-76G15  
ctg3973□□□WAG-28F15  
ctg3973□□□WAG-49L12  
ctg3974□□□WAG-42P2  
ctg3974□□□WAG-47E15  
ctg3975□□□WAG-32M8  
ctg3975□□□WAG-42J14  
ctg3976□□□WAG-38H13  
ctg3976□□□WAG-50G17  
ctg3977□□□WAG-35M18  
ctg3977□□□WAG-56L2  
ctg3978□□□WAG-34L18  
ctg3978□□□WAG-82F22  
ctg3979□□□WAG-34K16  
ctg3979□□□WAG-54L18  
ctg398□□□WAG-10F11  
ctg398□□□WAG-59L6

ctg398□ctg1145□ctg981□WAG-9J20  
ctg398□ctg1145□ctg981□WAG-62C8  
ctg398□ctg1145□ctg981□WAG-73J24  
ctg398□ctg1145□ctg981□WAG-83G1  
ctg398□ctg1145□ctg981□WAG-107F24  
ctg3980□□□WAG-11O2  
ctg3980□□□WAG-34C9  
ctg3981□□□WAG-3O19  
ctg3981□□□WAG-33M4  
ctg3982□□□WAG-21F12  
ctg3982□□□WAG-21H17  
ctg3983□□□WAG-20C19  
ctg3983□□□WAG-78L19  
ctg3984□□□WAG-18F12  
ctg3984□□□WAG-70L19  
ctg3985□□□WAG-79J5  
ctg3985□□□WAG-118J18  
ctg3986□□□WAG-59B12  
ctg3986□□□WAG-107K23  
ctg3987□□□WAG-75C11  
ctg3987□□□WAG-99F4  
ctg3988□□□WAG-92A7  
ctg3988□□□WAG-98F22  
ctg3989□□□WAG-23G18  
ctg3989□□□WAG-91K11  
ctg399□ctg1110□ctg1415□WAG-8A22  
ctg399□ctg1110□ctg1415□WAG-14G13  
ctg399□ctg1110□ctg1415□WAG-36G9  
ctg399□ctg1110□ctg1415□WAG-43E5  
ctg399□ctg1110□ctg1415□WAG-66N11  
ctg399□ctg1110□ctg1415□WAG-88F6  
ctg399□ctg1110□ctg1415□WAG-94I24  
ctg399□ctg1110□ctg1415□WAG-114J19  
ctg3990□□□WAG-57G15  
ctg3990□□□WAG-80B22  
ctg3991□□□WAG-5P16  
ctg3991□□□WAG-78E9  
ctg3992□□□WAG-7O18  
ctg3992□□□WAG-60O9  
ctg3993□□□WAG-60C1  
ctg3993□□□WAG-122B1  
ctg3994□□□WAG-5F6  
ctg3994□□□WAG-53E12  
ctg3995□□□WAG-47I12  
ctg3995□□□WAG-51E1  
ctg3996□□□WAG-34O17  
ctg3996□□□WAG-40E4  
ctg3997□□□WAG-36M13  
ctg3997□□□WAG-74G3  
ctg3998□□□WAG-34B1  
ctg3998□□□WAG-47N21  
ctg3999□□□WAG-17M22  
ctg3999□□□WAG-29M10  
ctg4□□□WAG-75O22  
ctg4□□□WAG-124O22  
ctg4□□□WAG-125E14

ctg4□ctg1283□ctg1500□WAG-12O23  
ctg4□ctg1283□ctg1500□WAG-20D9  
ctg4□ctg1283□ctg1500□WAG-21N17  
ctg4□ctg1283□ctg1500□WAG-42F10  
ctg4□ctg1283□ctg1500□WAG-60G11  
ctg4□ctg1283□ctg1500□WAG-71K6  
ctg4□ctg1283□ctg1500□WAG-82J6  
ctg4□ctg2181□□WAG-54C3  
ctg4□ctg2181□□WAG-84L5  
ctg4□ctg2181□ctg2547□WAG-64C17  
ctg4□ctg2181□ctg2547□WAG-128H16  
ctg4□ctg2181□ctg2547□WAG-130B23  
ctg4□ctg2181□ctg3856□WAG-14O17  
ctg4□ctg2181□ctg3856□WAG-62L7  
ctg4□ctg2181□ctg3856□WAG-69K6  
ctg4□ctg28□□WAG-1E18  
ctg4□ctg28□□WAG-42N7  
ctg4□ctg28□□WAG-65B21  
ctg4□ctg28□□WAG-115N2  
ctg4□ctg28□□WAG-122J17  
ctg4□ctg28□ctg1559□WAG-21G20  
ctg4□ctg28□ctg1559□WAG-58H3  
ctg4□ctg28□ctg1559□WAG-108G10  
ctg4□ctg28□ctg1559□WAG-113B9  
ctg4□ctg28□ctg1559□WAG-130A18  
ctg4□ctg28□ctg26□WAG-2G10  
ctg4□ctg28□ctg26□WAG-34P12  
ctg4□ctg28□ctg26□WAG-39H15  
ctg4□ctg28□ctg26□WAG-47P8  
ctg4□ctg28□ctg26□WAG-53L5  
ctg4□ctg28□ctg26□WAG-58I13  
ctg4□ctg28□ctg26□WAG-94H3  
ctg4□ctg28□ctg26□WAG-95E13  
ctg4□ctg28□ctg26□WAG-96E19  
ctg4□ctg28□ctg26□WAG-101A21  
ctg4□ctg28□ctg26□WAG-109D10  
ctg4□ctg28□ctg26□WAG-110F8  
ctg4□ctg28□ctg26□WAG-120I11  
ctg4□ctg28□ctg405□WAG-21I22  
ctg4□ctg28□ctg405□WAG-36E3  
ctg4□ctg28□ctg405□WAG-39B20  
ctg4□ctg28□ctg405□WAG-42F21  
ctg4□ctg28□ctg405□WAG-43J6  
ctg4□ctg28□ctg405□WAG-73F18  
ctg4□ctg28□ctg405□WAG-105L9  
ctg4□ctg28□ctg405□WAG-115E17  
ctg40□□□WAG-8N6  
ctg40□□□WAG-20N8  
ctg40□□□WAG-24C4  
ctg40□□□WAG-26E4  
ctg40□□□WAG-29N8  
ctg40□□□WAG-54O22  
ctg40□ctg172□□WAG-3M3  
ctg40□ctg172□□WAG-42C16  
ctg40□ctg172□□WAG-44I24  
ctg40□ctg172□□WAG-100J20

ctg40□ctg172□ctg2490□WAG-13L7  
ctg40□ctg172□ctg2490□WAG-67F12  
ctg40□ctg172□ctg2490□WAG-68O24  
ctg40□ctg172□ctg2490□WAG-98D20  
ctg40□ctg172□ctg2490□WAG-115E22  
ctg40□ctg172□ctg250□WAG-4D23  
ctg40□ctg172□ctg250□WAG-7D17  
ctg40□ctg172□ctg250□WAG-11K17  
ctg40□ctg172□ctg250□WAG-31H2  
ctg40□ctg172□ctg250□WAG-36E2  
ctg40□ctg172□ctg250□WAG-36M8  
ctg40□ctg172□ctg250□WAG-56D9  
ctg40□ctg172□ctg250□WAG-71O2  
ctg40□ctg172□ctg250□WAG-74B19  
ctg40□ctg172□ctg250□WAG-81A19  
ctg40□ctg172□ctg250□WAG-87H9  
ctg40□ctg172□ctg250□WAG-101K3  
ctg40□ctg172□ctg250□WAG-114C18  
ctg40□ctg172□ctg250□WAG-115O17  
ctg40□ctg172□ctg250□WAG-125D11  
ctg40□ctg172□ctg3881□WAG-48O20  
ctg40□ctg172□ctg3881□WAG-84L16  
ctg40□ctg172□ctg3881□WAG-120I22  
ctg40□ctg552□□WAG-27E21  
ctg40□ctg552□ctg611□WAG-7N2  
ctg40□ctg552□ctg611□WAG-13L1  
ctg40□ctg552□ctg611□WAG-26A3  
ctg40□ctg552□ctg611□WAG-41O8  
ctg40□ctg552□ctg611□WAG-69A8  
ctg40□ctg552□ctg611□WAG-88J24  
ctg40□ctg552□ctg611□WAG-98M12  
ctg40□ctg552□ctg611□WAG-125K14  
ctg40□ctg834□ctg938□WAG-3F2  
ctg40□ctg834□ctg938□WAG-12P17  
ctg40□ctg834□ctg938□WAG-20E2  
ctg40□ctg834□ctg938□WAG-23C22  
ctg40□ctg834□ctg938□WAG-38P12  
ctg40□ctg834□ctg938□WAG-55G2  
ctg40□ctg834□ctg938□WAG-58N21  
ctg40□ctg834□ctg938□WAG-95I9  
ctg40□ctg834□ctg938□WAG-105A14  
ctg40□ctg834□ctg938□WAG-120P19  
ctg40□ctg834□ctg938□WAG-130K11  
ctg400□ctg1112□□WAG-1M22  
ctg400□ctg1112□□WAG-43L4  
ctg400□ctg1112□ctg1660□WAG-35A19  
ctg400□ctg1112□ctg1660□WAG-46K19  
ctg400□ctg1112□ctg1660□WAG-58E21  
ctg400□ctg1112□ctg1660□WAG-76H24  
ctg400□ctg1112□ctg1660□WAG-78A4  
ctg400□ctg1112□ctg1660□WAG-85L17  
ctg400□ctg1112□ctg1660□WAG-124A10  
ctg400□ctg1112□ctg1660□WAG-129H6  
ctg4000□□□WAG-28M11  
ctg4000□□□WAG-35L5  
ctg4001□□□WAG-25E23

ctg4001□□□WAG-74O20  
ctg4002□□□WAG-4M13  
ctg4002□□□WAG-124P19  
ctg4003□ctg6575□□WAG-106L4  
ctg4003□ctg6575□□WAG-126A20  
ctg4004□□□WAG-64H15  
ctg4004□□□WAG-79A6  
ctg4005□□□WAG-77L5  
ctg4005□□□WAG-95A5  
ctg4006□□□WAG-53N14  
ctg4006□□□WAG-91P24  
ctg4007□□□WAG-28P8  
ctg4007□□□WAG-121O17  
ctg4008□□□WAG-23M20  
ctg4008□□□WAG-31G12  
ctg4009□ctg6576□□WAG-14H6  
ctg4009□ctg6576□□WAG-17J21  
ctg401□ctg1117□□WAG-116F10  
ctg401□ctg1117□□WAG-122A6  
ctg401□ctg1117□ctg952□WAG-20J11  
ctg401□ctg1117□ctg952□WAG-46K9  
ctg401□ctg1117□ctg952□WAG-70L23  
ctg401□ctg1117□ctg952□WAG-88L23  
ctg401□ctg1117□ctg952□WAG-92E10  
ctg401□ctg1117□ctg952□WAG-117B19  
ctg401□ctg1117□ctg952□WAG-121J15  
ctg401□ctg5902□□WAG-63C20  
ctg401□ctg5902□□WAG-91F11  
ctg4010□□□WAG-80N22  
ctg4010□□□WAG-86G10  
ctg4011□ctg6577□□WAG-68D19  
ctg4011□ctg6577□□WAG-113B20  
ctg4012□□□WAG-98B12  
ctg4012□□□WAG-130G22  
ctg4013□□□WAG-33G9  
ctg4013□□□WAG-115C12  
ctg4014□□□WAG-80D8  
ctg4014□□□WAG-114H13  
ctg4015□□□WAG-38H9  
ctg4015□□□WAG-98J15  
ctg4016□□□WAG-77J21  
ctg4016□□□WAG-97G10  
ctg4017□ctg6578□□WAG-87P5  
ctg4017□ctg6578□□WAG-95C14  
ctg4018□□□WAG-89C8  
ctg4018□□□WAG-91N17  
ctg4019□□□WAG-81H11  
ctg4019□□□WAG-82L2  
ctg402□□□WAG-51P9  
ctg402□ctg1580□□WAG-23D11  
ctg402□ctg1580□□WAG-51J15  
ctg402□ctg1580□□WAG-77O17  
ctg402□ctg1580□ctg2066□WAG-23P1  
ctg402□ctg1580□ctg2066□WAG-52J12  
ctg402□ctg1580□ctg2066□WAG-56C11  
ctg402□ctg1580□ctg2066□WAG-62G6

ctg402□ctg1580□ctg2066□WAG-62H6  
ctg402□ctg1580□ctg2066□WAG-67G19  
ctg402□ctg1580□ctg2066□WAG-69F23  
ctg402□ctg1580□ctg2066□WAG-86I21  
ctg402□ctg1580□ctg2066□WAG-113E5  
ctg402□ctg1580□ctg2066□WAG-116G15  
ctg402□ctg1580□ctg2066□WAG-120G11  
ctg4020□□□WAG-20N7  
ctg4020□□□WAG-66F12  
ctg4021□□□WAG-35P6  
ctg4021□□□WAG-105I23  
ctg4022□□□WAG-5J8  
ctg4022□□□WAG-11G6  
ctg4023□□□WAG-76B14  
ctg4023□□□WAG-91M1  
ctg4024□□□WAG-25K23  
ctg4024□□□WAG-116F8  
ctg4025□□□WAG-5A19  
ctg4025□□□WAG-118K7  
ctg4026□□□WAG-31K16  
ctg4026□□□WAG-80N2  
ctg4027□□□WAG-5J24  
ctg4027□□□WAG-104F6  
ctg4028□□□WAG-51M20  
ctg4028□□□WAG-104P12  
ctg4029□□□WAG-38E8  
ctg4029□□□WAG-107E2  
ctg403□□□WAG-96D22  
ctg403□ctg1531□□WAG-119A5  
ctg403□ctg1531□□WAG-121P5  
ctg403□ctg1531□ctg2376□WAG-59D20  
ctg403□ctg1531□ctg2376□WAG-79H14  
ctg403□ctg1531□ctg2376□WAG-109I10  
ctg403□ctg1531□ctg2376□WAG-122L13  
ctg403□ctg1531□ctg2530□WAG-18M9  
ctg403□ctg1531□ctg2530□WAG-43A7  
ctg403□ctg1531□ctg2530□WAG-65O9  
ctg403□ctg1531□ctg2530□WAG-66G17  
ctg403□ctg1531□ctg2530□WAG-81M1  
ctg403□ctg1531□ctg2530□WAG-85G22  
ctg403□ctg1531□ctg2530□WAG-127A23  
ctg4030□ctg6579□□WAG-2E16  
ctg4030□ctg6579□□WAG-79H21  
ctg4031□□□WAG-24B14  
ctg4031□□□WAG-96G1  
ctg4032□□□WAG-1A24  
ctg4032□□□WAG-1H23  
ctg4033□□□WAG-4M14  
ctg4033□□□WAG-5C19  
ctg4034□□□WAG-3A14  
ctg4034□□□WAG-3G24  
ctg4035□□□WAG-6C14  
ctg4035□□□WAG-55K19  
ctg4036□□□WAG-24J10  
ctg4036□□□WAG-82B20  
ctg4037□□□WAG-58F23

ctg4037□□□WAG-70F4  
ctg4038□□□WAG-I7  
ctg4038□□□WAG-61F13  
ctg4039□□□WAG-25B6  
ctg4039□□□WAG-117F23  
ctg404□ctg950□□WAG-93G6  
ctg404□ctg950□ctg995□WAG-62G20  
ctg404□ctg950□ctg995□WAG-63H24  
ctg404□ctg950□ctg995□WAG-87L11  
ctg404□ctg950□ctg995□WAG-100H23  
ctg404□ctg950□ctg995□WAG-101D22  
ctg404□ctg950□ctg995□WAG-103J5  
ctg4040□□□WAG-17K23  
ctg4040□□□WAG-37L23  
ctg4041□□□WAG-12O9  
ctg4041□□□WAG-71I20  
ctg4042□□□WAG-2G20  
ctg4042□□□WAG-3E18  
ctg4043□□□WAG-77B4  
ctg4043□□□WAG-85F14  
ctg4044□□□WAG-13P9  
ctg4044□□□WAG-20E19  
ctg4044□□□WAG-21G21  
ctg4044□□□WAG-38H11  
ctg4044□□□WAG-41L11  
ctg4044□□□WAG-51P24  
ctg4044□ctg1243□□WAG-24L5  
ctg4044□ctg1243□□WAG-101A15  
ctg4044□ctg1243□□WAG-117J3  
ctg4044□ctg1243□ctg1862□WAG-22L22  
ctg4044□ctg1243□ctg1862□WAG-49O13  
ctg4044□ctg1243□ctg1862□WAG-59P12  
ctg4044□ctg1243□ctg1862□WAG-85K8  
ctg4044□ctg1243□ctg1862□WAG-94B17  
ctg4044□ctg1243□ctg1862□WAG-107A4  
ctg4044□ctg1243□ctg1862□WAG-126A18  
ctg4044□ctg1243□ctg1914□WAG-8J17  
ctg4044□ctg1243□ctg1914□WAG-10P19  
ctg4044□ctg1243□ctg1914□WAG-22B10  
ctg4044□ctg1243□ctg1914□WAG-36F15  
ctg4044□ctg1243□ctg1914□WAG-41A5  
ctg4044□ctg1243□ctg1914□WAG-55K14  
ctg4044□ctg1243□ctg1914□WAG-77H6  
ctg4044□ctg1243□ctg1914□WAG-121D17  
ctg4044□ctg1556□□WAG-65K2  
ctg4044□ctg1556□ctg1852□WAG-40N8  
ctg4044□ctg1556□ctg1852□WAG-72G23  
ctg4044□ctg1556□ctg1852□WAG-94G4  
ctg4044□ctg1556□ctg1852□WAG-106C18  
ctg4044□ctg1556□ctg1852□WAG-113A10  
ctg4044□ctg1556□ctg1852□WAG-115L24  
ctg4044□ctg548□ctg447□WAG-10F4  
ctg4044□ctg548□ctg447□WAG-17N6  
ctg4044□ctg548□ctg447□WAG-21F1  
ctg4044□ctg548□ctg447□WAG-76A19  
ctg4044□ctg548□ctg447□WAG-91E21

ctg4044□ctg548□ctg447□WAG-129D5  
ctg4045□ctg173□ctg189□WAG-8O24  
ctg4045□ctg173□ctg189□WAG-35B19  
ctg4045□ctg173□ctg189□WAG-37H3  
ctg4045□ctg173□ctg189□WAG-72H8  
ctg4045□ctg173□ctg189□WAG-87G22  
ctg4045□ctg173□ctg189□WAG-88J2  
ctg4045□ctg173□ctg189□WAG-95N1  
ctg4045□ctg443□□WAG-38L8  
ctg4045□ctg443□ctg470□WAG-42I10  
ctg4045□ctg443□ctg470□WAG-51O17  
ctg4045□ctg443□ctg470□WAG-53D13  
ctg4045□ctg443□ctg470□WAG-72H15  
ctg4045□ctg443□ctg470□WAG-94H6  
ctg4045□ctg443□ctg470□WAG-96B11  
ctg4045□ctg443□ctg470□WAG-108O18  
ctg4045□ctg443□ctg470□WAG-110M11  
ctg4045□ctg443□ctg470□WAG-112C12  
ctg4045□ctg443□ctg470□WAG-116O14  
ctg4045□ctg443□ctg470□WAG-117B14  
ctg4045□ctg884□□WAG-16O15  
ctg4045□ctg884□□WAG-78J23  
ctg4045□ctg884□ctg922□WAG-14A17  
ctg4045□ctg884□ctg922□WAG-18E23  
ctg4045□ctg884□ctg922□WAG-20E23  
ctg4045□ctg884□ctg922□WAG-45G16  
ctg4045□ctg884□ctg922□WAG-47E10  
ctg4045□ctg884□ctg922□WAG-74F11  
ctg4046□□□WAG-37H9  
ctg4046□ctg1588□ctg1432□WAG-32E15  
ctg4046□ctg1588□ctg1432□WAG-35J20  
ctg4046□ctg1588□ctg1432□WAG-85L23  
ctg4046□ctg1588□ctg1432□WAG-96N19  
ctg4046□ctg1588□ctg1432□WAG-111K15  
ctg4046□ctg1588□ctg1432□WAG-117M2  
ctg4046□ctg3207□□WAG-17L9  
ctg4046□ctg3207□□WAG-76K15  
ctg4046□ctg3207□ctg5287□WAG-84B18  
ctg4046□ctg3207□ctg5287□WAG-112F14  
ctg4046□ctg3207□ctg6260□WAG-91H18  
ctg4046□ctg3207□ctg6260□WAG-128G15  
ctg4046□ctg321□□WAG-8H17  
ctg4046□ctg321□ctg242□WAG-20G4  
ctg4046□ctg321□ctg242□WAG-31J17  
ctg4046□ctg321□ctg242□WAG-36G2  
ctg4046□ctg321□ctg242□WAG-108O14  
ctg4046□ctg321□ctg242□WAG-113C14  
ctg4046□ctg321□ctg242□WAG-118J3  
ctg4047□□□WAG-8N14  
ctg4047□□□WAG-24A1  
ctg4047□□□WAG-27N3  
ctg4047□□□WAG-36O5  
ctg4047□□□WAG-75M12  
ctg4047□ctg1089□□WAG-94P15  
ctg4047□ctg1089□ctg1501□WAG-15P18  
ctg4047□ctg1089□ctg1501□WAG-17J20



ctg4047□ctg1089□ctg1501□WAG-30P14  
ctg4047□ctg1089□ctg1501□WAG-42B24  
ctg4047□ctg1089□ctg1501□WAG-44C14  
ctg4047□ctg1089□ctg1501□WAG-58M11  
ctg4047□ctg1089□ctg1501□WAG-83J9  
ctg4047□ctg1089□ctg1501□WAG-94L22  
ctg4047□ctg1089□ctg1501□WAG-107C2  
ctg4047□ctg1089□ctg1501□WAG-107J1  
ctg4047□ctg1089□ctg1501□WAG-120K8  
ctg4047□ctg1635□□WAG-53B24  
ctg4047□ctg1635□ctg2933□WAG-53M4  
ctg4047□ctg1635□ctg2933□WAG-55N21  
ctg4047□ctg1635□ctg2933□WAG-62N15  
ctg4047□ctg1635□ctg2933□WAG-91B17  
ctg4047□ctg1635□ctg3027□WAG-37G7  
ctg4047□ctg1635□ctg3027□WAG-76P12  
ctg4047□ctg1635□ctg3027□WAG-83M6  
ctg4047□ctg1635□ctg3027□WAG-114A5  
ctg4047□ctg1635□ctg3306□WAG-114M14  
ctg4047□ctg1635□ctg3306□WAG-118L8  
ctg4047□ctg2105□□WAG-73I3  
ctg4047□ctg2105□□WAG-81L17  
ctg4047□ctg2105□□WAG-85B1  
ctg4047□ctg2105□ctg1969□WAG-112I1  
ctg4047□ctg2105□ctg1969□WAG-116D24  
ctg4047□ctg2105□ctg1969□WAG-116M9  
ctg4047□ctg2105□ctg5198□WAG-31D3  
ctg4047□ctg2105□ctg5198□WAG-62C4  
ctg4047□ctg2558□□WAG-82P5  
ctg4047□ctg2558□ctg3339□WAG-97D7  
ctg4047□ctg2558□ctg3339□WAG-105D5  
ctg4047□ctg2558□ctg3339□WAG-119K21  
ctg4047□ctg2766□□WAG-7J4  
ctg4047□ctg2766□ctg3622□WAG-29C24  
ctg4047□ctg2766□ctg3622□WAG-91L11  
ctg4047□ctg2791□ctg3595□WAG-26J2  
ctg4047□ctg2791□ctg3595□WAG-45F3  
ctg4047□ctg2791□ctg3595□WAG-84C10  
ctg4047□ctg2791□ctg3595□WAG-116O15  
ctg4047□ctg302□ctg1699□WAG-14J22  
ctg4047□ctg302□ctg1699□WAG-15I2  
ctg4047□ctg302□ctg1699□WAG-52P17  
ctg4047□ctg302□ctg1699□WAG-87H10  
ctg4047□ctg302□ctg375□WAG-8P8  
ctg4047□ctg302□ctg375□WAG-19K3  
ctg4047□ctg302□ctg375□WAG-36A3  
ctg4047□ctg302□ctg375□WAG-79O13  
ctg4047□ctg302□ctg375□WAG-84I2  
ctg4047□ctg302□ctg375□WAG-90F7  
ctg4047□ctg302□ctg375□WAG-92N3  
ctg4047□ctg302□ctg375□WAG-126O10  
ctg4047□ctg302□ctg375□WAG-129M5  
ctg4047□ctg3609□ctg3790□WAG-32K10  
ctg4047□ctg3609□ctg3790□WAG-36D5  
ctg4047□ctg3609□ctg3790□WAG-44N16  
ctg4047□ctg3995□ctg4263□WAG-21H3

ctg4047□ctg3995□ctg4263□WAG-69F5  
ctg4047□ctg476□□WAG-69J4  
ctg4047□ctg476□□WAG-128C19  
ctg4047□ctg476□ctg2311□WAG-17M23  
ctg4047□ctg476□ctg2311□WAG-42C10  
ctg4047□ctg476□ctg2311□WAG-46K12  
ctg4047□ctg476□ctg2311□WAG-120N10  
ctg4047□ctg476□ctg2311□WAG-123F18  
ctg4047□ctg476□ctg637□WAG-20O16  
ctg4047□ctg476□ctg637□WAG-29J14  
ctg4047□ctg476□ctg637□WAG-40K18  
ctg4047□ctg476□ctg637□WAG-62E24  
ctg4047□ctg476□ctg637□WAG-72H17  
ctg4047□ctg476□ctg637□WAG-80H20  
ctg4047□ctg476□ctg637□WAG-82C19  
ctg4047□ctg476□ctg637□WAG-88N3  
ctg4047□ctg476□ctg637□WAG-96I6  
ctg4047□ctg476□ctg637□WAG-113A16  
ctg4047□ctg476□ctg637□WAG-115M21  
ctg4047□ctg476□ctg637□WAG-116H23  
ctg4047□ctg476□ctg637□WAG-119I14  
ctg4048□□□WAG-63G14  
ctg4048□□□WAG-73L4  
ctg4048□□□WAG-97J18  
ctg4048□□□WAG-103D5  
ctg4048□ctg1571□□WAG-111K2  
ctg4048□ctg1571□ctg1414□WAG-34N5  
ctg4048□ctg1571□ctg1414□WAG-46O13  
ctg4048□ctg1571□ctg1414□WAG-47L5  
ctg4048□ctg1571□ctg1414□WAG-52I11  
ctg4048□ctg1571□ctg1414□WAG-81I14  
ctg4048□ctg1571□ctg1414□WAG-111E8  
ctg4048□ctg2022□ctg1868□WAG-45D7  
ctg4048□ctg2022□ctg1868□WAG-66B6  
ctg4048□ctg2022□ctg1868□WAG-90D16  
ctg4048□ctg2022□ctg1868□WAG-101C4  
ctg4048□ctg889□ctg2772□WAG-63H12  
ctg4048□ctg889□ctg2772□WAG-63H14  
ctg4048□ctg889□ctg2772□WAG-67P17  
ctg4048□ctg889□ctg927□WAG-10N24  
ctg4048□ctg889□ctg927□WAG-13O19  
ctg4048□ctg889□ctg927□WAG-16H16  
ctg4048□ctg889□ctg927□WAG-47G23  
ctg4048□ctg889□ctg927□WAG-61K7  
ctg4048□ctg889□ctg927□WAG-101C20  
ctg4048□ctg889□ctg927□WAG-114I23  
ctg4049□□□WAG-19O8  
ctg4049□□□WAG-55M15  
ctg4049□□□WAG-80B5  
ctg4049□ctg224□□WAG-109E6  
ctg4049□ctg224□ctg1233□WAG-21N7  
ctg4049□ctg224□ctg1233□WAG-35D9  
ctg4049□ctg224□ctg1233□WAG-61E22  
ctg4049□ctg224□ctg1233□WAG-78M5  
ctg4049□ctg224□ctg1233□WAG-117P11  
ctg4049□ctg224□ctg1233□WAG-120O10

ctg4049□ctg224□ctg1233□WAG-122L5  
ctg4049□ctg224□ctg1233□WAG-125M13  
ctg4049□ctg224□ctg1233□WAG-127O20  
ctg4049□ctg224□ctg315□WAG-17D23  
ctg4049□ctg224□ctg315□WAG-20D16  
ctg4049□ctg224□ctg315□WAG-23I18  
ctg4049□ctg224□ctg315□WAG-50D15  
ctg4049□ctg224□ctg315□WAG-56D20  
ctg4049□ctg224□ctg315□WAG-60O24  
ctg4049□ctg224□ctg315□WAG-74E2  
ctg4049□ctg224□ctg315□WAG-83P18  
ctg4049□ctg224□ctg315□WAG-119E13  
ctg4049□ctg5284□ctg6118□WAG-12G6  
ctg4049□ctg5284□ctg6118□WAG-12K13  
ctg4049□ctg621□□WAG-12D11  
ctg4049□ctg621□ctg674□WAG-9P7  
ctg4049□ctg621□ctg674□WAG-16M4  
ctg4049□ctg621□ctg674□WAG-42P11  
ctg4049□ctg621□ctg674□WAG-48M22  
ctg4049□ctg621□ctg674□WAG-57G11  
ctg4049□ctg621□ctg674□WAG-72E10  
ctg4049□ctg621□ctg674□WAG-86A15  
ctg4049□ctg621□ctg674□WAG-110I17  
ctg4049□ctg621□ctg674□WAG-125L5  
ctg405□ctg1365□□WAG-61M17  
ctg405□ctg1365□ctg1206□WAG-27I9  
ctg405□ctg1365□ctg1206□WAG-39D6  
ctg405□ctg1365□ctg1206□WAG-49O7  
ctg405□ctg1365□ctg1206□WAG-81N22  
ctg405□ctg1365□ctg1206□WAG-85L11  
ctg405□ctg1365□ctg1206□WAG-94G12  
ctg405□ctg1365□ctg1206□WAG-114I9  
ctg405□ctg1365□ctg1206□WAG-120J15  
ctg405□ctg1365□ctg1206□WAG-130M17  
ctg4050□□□WAG-G17  
ctg4050□□□WAG-1L4  
ctg4050□□□WAG-20D3  
ctg4050□□□WAG-59B2  
ctg4050□□□WAG-80P24  
ctg4050□ctg1572□□WAG-64K6  
ctg4050□ctg1572□ctg1692□WAG-6J11  
ctg4050□ctg1572□ctg1692□WAG-75D6  
ctg4050□ctg1572□ctg1692□WAG-77A6  
ctg4050□ctg1572□ctg1692□WAG-78H19  
ctg4050□ctg1572□ctg1692□WAG-101E17  
ctg4050□ctg1572□ctg1692□WAG-123B2  
ctg4050□ctg3153□ctg3765□WAG-33B4  
ctg4050□ctg3153□ctg3765□WAG-84B22  
ctg4050□ctg3153□ctg3765□WAG-95J5  
ctg4050□ctg3153□ctg3765□WAG-124J14  
ctg4050□ctg3699□□WAG-95O9  
ctg4050□ctg3699□□WAG-127N12  
ctg4050□ctg3699□ctg5420□WAG-23E9  
ctg4050□ctg3699□ctg5420□WAG-119N21  
ctg4050□ctg4290□□WAG-104K10  
ctg4050□ctg4290□ctg5788□WAG-21F9

ctg4050□ctg4290□ctg5788□WAG-100F13  
ctg4050□ctg63□□WAG-9N16  
ctg4050□ctg63□□WAG-90D8  
ctg4050□ctg63□ctg46□WAG-19M12  
ctg4050□ctg63□ctg46□WAG-25K14  
ctg4050□ctg63□ctg46□WAG-33C22  
ctg4050□ctg63□ctg46□WAG-41C7  
ctg4050□ctg63□ctg46□WAG-42A16  
ctg4050□ctg63□ctg46□WAG-47L7  
ctg4050□ctg63□ctg46□WAG-47O14  
ctg4050□ctg63□ctg46□WAG-60G16  
ctg4050□ctg63□ctg46□WAG-64M21  
ctg4050□ctg63□ctg46□WAG-67K3  
ctg4050□ctg63□ctg46□WAG-73G6  
ctg4050□ctg63□ctg46□WAG-76N17  
ctg4050□ctg63□ctg46□WAG-85L21  
ctg4050□ctg63□ctg46□WAG-91P13  
ctg4050□ctg63□ctg46□WAG-113P17  
ctg4050□ctg63□ctg46□WAG-128N14  
ctg4051□□□WAG-39D15  
ctg4051□□□WAG-49A4  
ctg4051□□□WAG-57N4  
ctg4051□□□WAG-62F21  
ctg4051□□□WAG-75M13  
ctg4051□□□WAG-78K6  
ctg4051□ctg1860□□WAG-66F6  
ctg4051□ctg1860□ctg1690□WAG-19B11  
ctg4051□ctg1860□ctg1690□WAG-23C21  
ctg4051□ctg1860□ctg1690□WAG-42N8  
ctg4051□ctg1860□ctg1690□WAG-49B14  
ctg4051□ctg1860□ctg1690□WAG-68F15  
ctg4051□ctg1860□ctg1690□WAG-101A13  
ctg4051□ctg1860□ctg1690□WAG-130E10  
ctg4051□ctg406□ctg2724□WAG-24P16  
ctg4051□ctg406□ctg2724□WAG-75P19  
ctg4051□ctg406□ctg2724□WAG-117L20  
ctg4051□ctg406□ctg461□WAG-72A18  
ctg4051□ctg406□ctg461□WAG-73K9  
ctg4051□ctg406□ctg461□WAG-95D13  
ctg4051□ctg406□ctg461□WAG-109D23  
ctg4051□ctg406□ctg461□WAG-120B13  
ctg4051□ctg406□ctg461□WAG-129O7  
ctg4051□ctg779□□WAG-119A1  
ctg4051□ctg779□ctg994□WAG-8I18  
ctg4051□ctg779□ctg994□WAG-13P11  
ctg4051□ctg779□ctg994□WAG-26H2  
ctg4051□ctg779□ctg994□WAG-32O11  
ctg4051□ctg779□ctg994□WAG-38L10  
ctg4051□ctg779□ctg994□WAG-40G8  
ctg4051□ctg779□ctg994□WAG-46K16  
ctg4051□ctg779□ctg994□WAG-51H8  
ctg4051□ctg779□ctg994□WAG-51M11  
ctg4051□ctg779□ctg994□WAG-53F19  
ctg4051□ctg779□ctg994□WAG-62H1  
ctg4051□ctg779□ctg994□WAG-67A3  
ctg4051□ctg779□ctg994□WAG-79E11

ctg4051□ctg779□ctg994□WAG-87P8  
ctg4051□ctg779□ctg994□WAG-90N24  
ctg4051□ctg779□ctg994□WAG-93L4  
ctg4051□ctg779□ctg994□WAG-101K6  
ctg4051□ctg779□ctg994□WAG-118P21  
ctg4051□ctg779□ctg994□WAG-121N21  
ctg4052□□□WAG-69H2  
ctg4052□ctg3094□□WAG-50N19  
ctg4052□ctg3094□ctg3824□WAG-55C14  
ctg4052□ctg3094□ctg3824□WAG-58F6  
ctg4052□ctg3094□ctg3824□WAG-86N19  
ctg4052□ctg6228□□WAG-80C21  
ctg4052□ctg6228□□WAG-105M15  
ctg4053□ctg3665□□WAG-7C21  
ctg4053□ctg3665□ctg5006□WAG-29J12  
ctg4053□ctg3665□ctg5006□WAG-56F18  
ctg4053□ctg3665□ctg5006□WAG-74C1  
ctg4053□ctg4584□ctg4738□WAG-104J2  
ctg4053□ctg4584□ctg4738□WAG-126B5  
ctg4054□ctg130□□WAG-4J21  
ctg4054□ctg130□□WAG-13O23  
ctg4054□ctg130□□WAG-87E10  
ctg4054□ctg130□□WAG-102P2  
ctg4054□ctg130□ctg184□WAG-59K9  
ctg4054□ctg130□ctg184□WAG-63I14  
ctg4054□ctg130□ctg184□WAG-70P13  
ctg4054□ctg130□ctg184□WAG-93A17  
ctg4054□ctg130□ctg184□WAG-112C13  
ctg4054□ctg130□ctg184□WAG-118J10  
ctg4054□ctg130□ctg184□WAG-127J9  
ctg4054□ctg130□ctg224□WAG-20A20  
ctg4054□ctg130□ctg224□WAG-22I8  
ctg4054□ctg130□ctg224□WAG-41I19  
ctg4054□ctg130□ctg224□WAG-57N19  
ctg4054□ctg130□ctg224□WAG-63M1  
ctg4054□ctg130□ctg224□WAG-68O19  
ctg4054□ctg130□ctg224□WAG-71B1  
ctg4054□ctg130□ctg224□WAG-79M17  
ctg4054□ctg130□ctg224□WAG-93L20  
ctg4054□ctg130□ctg224□WAG-124F24  
ctg4054□ctg130□ctg3275□WAG-69H8  
ctg4054□ctg130□ctg3275□WAG-90M4  
ctg4054□ctg130□ctg3275□WAG-91D13  
ctg4054□ctg130□ctg3275□WAG-120E1  
ctg4054□ctg130□ctg693□WAG-1H3  
ctg4054□ctg130□ctg693□WAG-31J12  
ctg4054□ctg130□ctg693□WAG-64N21  
ctg4054□ctg130□ctg693□WAG-83O21  
ctg4054□ctg130□ctg693□WAG-92J18  
ctg4054□ctg130□ctg693□WAG-108I10  
ctg4054□ctg130□ctg693□WAG-124C1  
ctg4055□□□WAG-15H16  
ctg4055□□□WAG-38L17  
ctg4055□□□WAG-46M13  
ctg4055□□□WAG-127I23  
ctg4055□ctg109□ctg101□WAG-33C18

ctg4055□ctg109□ctg101□WAG-41A18  
ctg4055□ctg109□ctg101□WAG-48N5  
ctg4055□ctg109□ctg101□WAG-54E20  
ctg4055□ctg109□ctg101□WAG-56O9  
ctg4055□ctg109□ctg101□WAG-70C11  
ctg4055□ctg109□ctg101□WAG-97F13  
ctg4055□ctg109□ctg101□WAG-120F13  
ctg4055□ctg109□ctg101□WAG-121J14  
ctg4055□ctg109□ctg101□WAG-128B12  
ctg4055□ctg109□ctg101□WAG-129D13  
ctg4055□ctg2928□ctg2903□WAG-64I7  
ctg4055□ctg2928□ctg2903□WAG-75D5  
ctg4055□ctg2928□ctg2903□WAG-78F14  
ctg4055□ctg3748□□WAG-58E10  
ctg4055□ctg3748□ctg3978□WAG-17G13  
ctg4055□ctg3748□ctg3978□WAG-68B1  
ctg4055□ctg3748□ctg3978□WAG-129K15  
ctg4055□ctg3748□ctg3978□WAG-130L19  
ctg4055□ctg3748□ctg6421□WAG-40I18  
ctg4055□ctg3748□ctg6421□WAG-126J3  
ctg4055□ctg381□□WAG-39M10  
ctg4055□ctg381□□WAG-102I7  
ctg4055□ctg381□□WAG-112M13  
ctg4055□ctg381□ctg284□WAG-37D2  
ctg4055□ctg381□ctg284□WAG-54B3  
ctg4055□ctg381□ctg284□WAG-65A23  
ctg4055□ctg381□ctg284□WAG-72C3  
ctg4055□ctg381□ctg284□WAG-75K6  
ctg4055□ctg381□ctg284□WAG-81O20  
ctg4055□ctg381□ctg284□WAG-97O15  
ctg4055□ctg381□ctg284□WAG-103O1  
ctg4055□ctg381□ctg284□WAG-112A19  
ctg4055□ctg381□ctg284□WAG-114G11  
ctg4055□ctg381□ctg284□WAG-118P3  
ctg4055□ctg381□ctg284□WAG-124L21  
ctg4055□ctg381□ctg4648□WAG-47E6  
ctg4055□ctg381□ctg4648□WAG-83K21  
ctg4056□ctg1239□□WAG-52N4  
ctg4056□ctg1239□□WAG-78F10  
ctg4056□ctg1239□□WAG-123O21  
ctg4056□ctg1239□ctg1675□WAG-4G19  
ctg4056□ctg1239□ctg1675□WAG-35N17  
ctg4056□ctg1239□ctg1675□WAG-76B18  
ctg4056□ctg1239□ctg1675□WAG-96M3  
ctg4056□ctg1239□ctg1675□WAG-124I11  
ctg4056□ctg1239□ctg2808□WAG-58F24  
ctg4056□ctg1239□ctg2808□WAG-93J7  
ctg4056□ctg1239□ctg2808□WAG-97A16  
ctg4056□ctg1239□ctg2808□WAG-109D22  
ctg4056□ctg1239□ctg2808□WAG-119C10  
ctg4056□ctg1239□ctg2808□WAG-125A13  
ctg4056□ctg6607□ctg6972□WAG-23A5  
ctg4056□ctg6607□ctg6972□WAG-59L19  
ctg4056□ctg6607□ctg6972□WAG-116B6  
ctg4056□ctg69□ctg196□WAG-13D11  
ctg4056□ctg69□ctg196□WAG-18E7

ctg4056□ctg69□ctg196□WAG-35J1  
ctg4056□ctg69□ctg196□WAG-36N2  
ctg4056□ctg69□ctg196□WAG-47J5  
ctg4056□ctg69□ctg196□WAG-66C18  
ctg4056□ctg69□ctg196□WAG-69L16  
ctg4056□ctg69□ctg196□WAG-75O23  
ctg4056□ctg69□ctg196□WAG-77P24  
ctg4056□ctg69□ctg196□WAG-80B11  
ctg4056□ctg69□ctg196□WAG-80J13  
ctg4056□ctg69□ctg196□WAG-81I13  
ctg4056□ctg69□ctg196□WAG-106I3  
ctg4056□ctg69□ctg196□WAG-127A16  
ctg4056□ctg69□ctg196□WAG-128G16  
ctg4056□ctg69□ctg196□WAG-129L22  
ctg4056□ctg69□ctg51□WAG-20C23  
ctg4056□ctg69□ctg51□WAG-30D19  
ctg4056□ctg69□ctg51□WAG-30J3  
ctg4056□ctg69□ctg51□WAG-34B19  
ctg4056□ctg69□ctg51□WAG-34E17  
ctg4056□ctg69□ctg51□WAG-40K14  
ctg4056□ctg69□ctg51□WAG-45D5  
ctg4056□ctg69□ctg51□WAG-47C22  
ctg4056□ctg69□ctg51□WAG-48E8  
ctg4056□ctg69□ctg51□WAG-48L3  
ctg4056□ctg69□ctg51□WAG-50H11  
ctg4056□ctg69□ctg51□WAG-53C16  
ctg4056□ctg69□ctg51□WAG-54H2  
ctg4056□ctg69□ctg51□WAG-57O21  
ctg4056□ctg69□ctg51□WAG-61O3  
ctg4056□ctg69□ctg51□WAG-63F18  
ctg4056□ctg69□ctg51□WAG-74I7  
ctg4056□ctg69□ctg51□WAG-75N22  
ctg4056□ctg69□ctg51□WAG-82G6  
ctg4056□ctg69□ctg51□WAG-86D18  
ctg4056□ctg69□ctg51□WAG-95F13  
ctg4056□ctg69□ctg51□WAG-97J1  
ctg4056□ctg69□ctg51□WAG-99P3  
ctg4056□ctg69□ctg51□WAG-102B15  
ctg4056□ctg69□ctg51□WAG-106O2  
ctg4056□ctg69□ctg51□WAG-115H21  
ctg4056□ctg69□ctg51□WAG-118I1  
ctg4056□ctg69□ctg51□WAG-122D10  
ctg4056□ctg69□ctg51□WAG-125L2  
ctg4056□ctg69□ctg6546□WAG-4F21  
ctg4056□ctg69□ctg6546□WAG-89B13  
ctg4057□□□WAG-1I1  
ctg4057□□□WAG-35O20  
ctg4057□□□WAG-49L10  
ctg4057□□□WAG-61H8  
ctg4057□□□WAG-92F6  
ctg4057□ctg1069□ctg1246□WAG-8O15  
ctg4057□ctg1069□ctg1246□WAG-65D20  
ctg4057□ctg1069□ctg1246□WAG-88I1  
ctg4057□ctg1069□ctg1293□WAG-9G6  
ctg4057□ctg1069□ctg1293□WAG-41N13  
ctg4057□ctg1069□ctg1293□WAG-43D7

ctg4057□ctg1069□ctg1293□WAG-59F17  
ctg4057□ctg1069□ctg1293□WAG-87O14  
ctg4057□ctg1069□ctg1293□WAG-111M16  
ctg4057□ctg1088□□WAG-43C1  
ctg4057□ctg1088□□WAG-58G12  
ctg4057□ctg1088□□WAG-101H10  
ctg4057□ctg1088□ctg6504□WAG-47A22  
ctg4057□ctg1088□ctg6504□WAG-80I11  
ctg4057□ctg1088□ctg976□WAG-27L7  
ctg4057□ctg1088□ctg976□WAG-29F4  
ctg4057□ctg1088□ctg976□WAG-34O2  
ctg4057□ctg1088□ctg976□WAG-37D20  
ctg4057□ctg1088□ctg976□WAG-78M14  
ctg4057□ctg1088□ctg976□WAG-86K7  
ctg4057□ctg1088□ctg976□WAG-89E8  
ctg4057□ctg1088□ctg976□WAG-104K4  
ctg4057□ctg1088□ctg976□WAG-122F6  
ctg4057□ctg2962□□WAG-44H14  
ctg4057□ctg2962□□WAG-70O14  
ctg4057□ctg2962□ctg4700□WAG-15J19  
ctg4057□ctg2962□ctg4700□WAG-120O18  
ctg4057□ctg931□□WAG-111C23  
ctg4057□ctg931□ctg911□WAG-45J17  
ctg4057□ctg931□ctg911□WAG-64F22  
ctg4057□ctg931□ctg911□WAG-70E14  
ctg4057□ctg931□ctg911□WAG-76B8  
ctg4058□□□WAG-27H10  
ctg4058□□□WAG-27M18  
ctg4058□ctg253□□WAG-10M24  
ctg4058□ctg253□□WAG-24C18  
ctg4058□ctg253□ctg203□WAG-13K17  
ctg4058□ctg253□ctg203□WAG-56M12  
ctg4058□ctg253□ctg203□WAG-59L2  
ctg4058□ctg253□ctg203□WAG-64D10  
ctg4058□ctg253□ctg203□WAG-71L12  
ctg4058□ctg253□ctg203□WAG-82C10  
ctg4058□ctg253□ctg203□WAG-83B22  
ctg4058□ctg253□ctg203□WAG-99C19  
ctg4058□ctg253□ctg203□WAG-103G16  
ctg4058□ctg253□ctg203□WAG-118G22  
ctg4058□ctg253□ctg3364□WAG-37C10  
ctg4058□ctg253□ctg3364□WAG-77O16  
ctg4058□ctg253□ctg3364□WAG-118N23  
ctg4058□ctg253□ctg3963□WAG-41O21  
ctg4058□ctg253□ctg3963□WAG-67H21  
ctg4058□ctg253□ctg5321□WAG-87M15  
ctg4058□ctg253□ctg5321□WAG-129G17  
ctg4059□□□WAG-72G16  
ctg4059□□□WAG-94E24  
ctg4059□ctg2765□□WAG-8M22  
ctg4059□ctg2765□ctg3707□WAG-44G14  
ctg4059□ctg2765□ctg3707□WAG-81G8  
ctg4059□ctg2765□ctg3707□WAG-95P10  
ctg4059□ctg2765□ctg3707□WAG-104I21  
ctg4059□ctg3977□ctg4242□WAG-109M7  
ctg4059□ctg3977□ctg4242□WAG-122F3



ctg4059□ctg420□□WAG-4K22  
ctg4059□ctg420□□WAG-89G9  
ctg4059□ctg420□ctg551□WAG-18D3  
ctg4059□ctg420□ctg551□WAG-23E12  
ctg4059□ctg420□ctg551□WAG-38B15  
ctg4059□ctg420□ctg551□WAG-84D1  
ctg4059□ctg420□ctg551□WAG-118M5  
ctg4059□ctg420□ctg6953□WAG-85O10  
ctg4059□ctg420□ctg6953□WAG-88B10  
ctg4059□ctg437□ctg466□WAG-50O12  
ctg4059□ctg437□ctg466□WAG-93K20  
ctg4059□ctg437□ctg466□WAG-98O17  
ctg4059□ctg437□ctg466□WAG-107A3  
ctg4059□ctg437□ctg466□WAG-109G16  
ctg4059□ctg437□ctg466□WAG-123K19  
ctg4059□ctg4712□ctg4888□WAG-107C9  
ctg4059□ctg4712□ctg4888□WAG-112N14  
ctg406□□□WAG-36M15  
ctg406□□□WAG-53O19  
ctg406□□□WAG-126N11  
ctg406□ctg1642□□WAG-16O23  
ctg406□ctg1642□□WAG-21F21  
ctg406□ctg1642□□WAG-26G13  
ctg406□ctg1642□□WAG-66P21  
ctg406□ctg1642□ctg1669□WAG-55F16  
ctg406□ctg1642□ctg1669□WAG-103N16  
ctg406□ctg1642□ctg1669□WAG-105H21  
ctg406□ctg1642□ctg1669□WAG-119C12  
ctg406□ctg1642□ctg3045□WAG-44C15  
ctg406□ctg1642□ctg3045□WAG-80F20  
ctg406□ctg1642□ctg3045□WAG-84J14  
ctg406□ctg1642□ctg4821□WAG-41G1  
ctg406□ctg1642□ctg4821□WAG-61P4  
ctg4060□□□WAG-31D11  
ctg4060□□□WAG-100A13  
ctg4060□□□WAG-115J20  
ctg4060□ctg1321□□WAG-10N9  
ctg4060□ctg1321□ctg3408□WAG-58K7  
ctg4060□ctg1321□ctg3408□WAG-77O10  
ctg4060□ctg1321□ctg3408□WAG-81B9  
ctg4060□ctg1321□ctg3521□WAG-13O10  
ctg4060□ctg1321□ctg3521□WAG-28C6  
ctg4060□ctg1321□ctg3521□WAG-54C7  
ctg4060□ctg1321□ctg5926□WAG-49F16  
ctg4060□ctg1321□ctg5926□WAG-51A22  
ctg4060□ctg366□ctg2518□WAG-50H10  
ctg4060□ctg366□ctg2518□WAG-74C21  
ctg4060□ctg366□ctg2518□WAG-87C22  
ctg4060□ctg366□ctg2518□WAG-98H19  
ctg4060□ctg366□ctg2518□WAG-111J3  
ctg4060□ctg366□ctg273□WAG-10B10  
ctg4060□ctg366□ctg273□WAG-29I21  
ctg4060□ctg366□ctg273□WAG-59C16  
ctg4060□ctg366□ctg273□WAG-69B21  
ctg4060□ctg366□ctg273□WAG-71C17  
ctg4060□ctg366□ctg273□WAG-73A24

ctg4060□ctg366□ctg273□WAG-74J10  
ctg4060□ctg366□ctg273□WAG-113J8  
ctg4060□ctg366□ctg273□WAG-125K24  
ctg4060□ctg366□ctg6231□WAG-25O14  
ctg4060□ctg366□ctg6231□WAG-105M1  
ctg4060□ctg5444□ctg6485□WAG-41A17  
ctg4060□ctg5444□ctg6485□WAG-66O6  
ctg4060□ctg5864□ctg6935□WAG-12F20  
ctg4060□ctg5864□ctg6935□WAG-56H17  
ctg4060□ctg929□ctg1399□WAG-17M4  
ctg4060□ctg929□ctg1399□WAG-34O4  
ctg4060□ctg929□ctg1399□WAG-35H7  
ctg4060□ctg929□ctg1399□WAG-48C1  
ctg4060□ctg929□ctg1399□WAG-86A2  
ctg4060□ctg929□ctg1399□WAG-86I6  
ctg4060□ctg929□ctg1399□WAG-87D23  
ctg4060□ctg929□ctg1399□WAG-103I14  
ctg4060□ctg929□ctg1399□WAG-104F13  
ctg4060□ctg929□ctg1399□WAG-108O9  
ctg4060□ctg929□ctg5524□WAG-4E22  
ctg4060□ctg929□ctg5524□WAG-102I22  
ctg4061□□□WAG-19G18  
ctg4061□□□WAG-101K10  
ctg4061□□□WAG-123M11  
ctg4061□ctg131□ctg141□WAG-32L13  
ctg4061□ctg131□ctg141□WAG-35L18  
ctg4061□ctg131□ctg141□WAG-44N6  
ctg4061□ctg131□ctg141□WAG-55P21  
ctg4061□ctg131□ctg141□WAG-67B21  
ctg4061□ctg131□ctg141□WAG-68J15  
ctg4061□ctg131□ctg141□WAG-84C16  
ctg4061□ctg131□ctg141□WAG-96L20  
ctg4061□ctg131□ctg141□WAG-107P8  
ctg4061□ctg131□ctg141□WAG-118K18  
ctg4061□ctg131□ctg141□WAG-119D20  
ctg4061□ctg131□ctg141□WAG-119P14  
ctg4061□ctg153□ctg164□WAG-15N16  
ctg4061□ctg153□ctg164□WAG-23O3  
ctg4061□ctg153□ctg164□WAG-62J19  
ctg4061□ctg153□ctg164□WAG-71E11  
ctg4061□ctg153□ctg164□WAG-75D8  
ctg4061□ctg153□ctg164□WAG-78N2  
ctg4061□ctg153□ctg164□WAG-102E8  
ctg4061□ctg153□ctg164□WAG-102L7  
ctg4061□ctg153□ctg164□WAG-113B3  
ctg4061□ctg153□ctg164□WAG-114D21  
ctg4061□ctg153□ctg164□WAG-120C20  
ctg4061□ctg248□□□WAG-99O15  
ctg4061□ctg248□ctg195□WAG-36E13  
ctg4061□ctg248□ctg195□WAG-41L14  
ctg4061□ctg248□ctg195□WAG-49A11  
ctg4061□ctg248□ctg195□WAG-55H2  
ctg4061□ctg248□ctg195□WAG-58F20  
ctg4061□ctg248□ctg195□WAG-62H22  
ctg4061□ctg248□ctg195□WAG-79N15  
ctg4061□ctg248□ctg195□WAG-90G1

ctg4061□ctg248□ctg195□WAG-100O10  
ctg4061□ctg248□ctg195□WAG-103F6  
ctg4061□ctg248□ctg195□WAG-107A2  
ctg4061□ctg248□ctg195□WAG-125N17  
ctg4061□ctg248□ctg195□WAG-126I14  
ctg4061□ctg6344□□WAG-81L2  
ctg4061□ctg6344□□WAG-98M17  
ctg4062□□□WAG-72E16  
ctg4062□□□WAG-81A1  
ctg4062□□□WAG-115J12  
ctg4062□ctg1097□ctg1608□WAG-22M3  
ctg4062□ctg1097□ctg1608□WAG-28F23  
ctg4062□ctg1097□ctg1608□WAG-73J20  
ctg4062□ctg1097□ctg1608□WAG-80F4  
ctg4062□ctg1097□ctg1608□WAG-100L3  
ctg4062□ctg1097□ctg1608□WAG-103K6  
ctg4062□ctg1097□ctg1608□WAG-125J12  
ctg4062□ctg1351□□WAG-67O3  
ctg4062□ctg1351□□WAG-111A8  
ctg4062□ctg1351□ctg1318□WAG-3G19  
ctg4062□ctg1351□ctg1318□WAG-5N24  
ctg4062□ctg1351□ctg1318□WAG-7L15  
ctg4062□ctg1351□ctg1318□WAG-32E23  
ctg4062□ctg1351□ctg1318□WAG-39H13  
ctg4062□ctg1351□ctg1318□WAG-47O13  
ctg4062□ctg1351□ctg1318□WAG-74P23  
ctg4062□ctg1351□ctg1318□WAG-77G21  
ctg4062□ctg1351□ctg1318□WAG-95M3  
ctg4062□ctg1351□ctg1318□WAG-99L17  
ctg4062□ctg1351□ctg1318□WAG-123O24  
ctg4062□ctg1351□ctg1498□WAG-28O4  
ctg4062□ctg1351□ctg1498□WAG-61E20  
ctg4062□ctg1351□ctg1498□WAG-62C5  
ctg4062□ctg1351□ctg1498□WAG-70G6  
ctg4062□ctg1351□ctg1498□WAG-86O17  
ctg4062□ctg1351□ctg1498□WAG-97L17  
ctg4062□ctg1560□□WAG-3O9  
ctg4062□ctg1560□ctg1403□WAG-23K2  
ctg4062□ctg1560□ctg1403□WAG-25N15  
ctg4062□ctg1560□ctg1403□WAG-28A2  
ctg4062□ctg1560□ctg1403□WAG-66O13  
ctg4062□ctg1560□ctg1403□WAG-89J14  
ctg4062□ctg1560□ctg1403□WAG-123D13  
ctg4062□ctg2182□□WAG-16C9  
ctg4062□ctg2182□□WAG-67F23  
ctg4062□ctg2182□□WAG-74P14  
ctg4062□ctg2182□□WAG-84B23  
ctg4062□ctg2182□ctg2665□WAG-54C20  
ctg4062□ctg2182□ctg2665□WAG-65H19  
ctg4062□ctg2182□ctg2665□WAG-103O20  
ctg4062□ctg2182□ctg2665□WAG-105E14  
ctg4062□ctg2851□□WAG-103L19  
ctg4062□ctg2851□ctg2837□WAG-6H24  
ctg4062□ctg2851□ctg2837□WAG-53P7  
ctg4062□ctg2851□ctg2837□WAG-70A3  
ctg4062□ctg2851□ctg2837□WAG-128H14

ctg4062□ctg328□□WAG-60A2  
ctg4062□ctg328□□WAG-124O15  
ctg4062□ctg328□ctg413□WAG-12M6  
ctg4062□ctg328□ctg413□WAG-24M9  
ctg4062□ctg328□ctg413□WAG-51L22  
ctg4062□ctg328□ctg413□WAG-54J15  
ctg4062□ctg328□ctg413□WAG-56J19  
ctg4062□ctg328□ctg413□WAG-71I18  
ctg4062□ctg328□ctg413□WAG-72N14  
ctg4062□ctg328□ctg413□WAG-82N8  
ctg4062□ctg328□ctg413□WAG-98E3  
ctg4062□ctg328□ctg413□WAG-104C2  
ctg4062□ctg328□ctg413□WAG-110I18  
ctg4062□ctg328□ctg413□WAG-113L19  
ctg4062□ctg328□ctg413□WAG-123B9  
ctg4062□ctg328□ctg413□WAG-124H20  
ctg4062□ctg328□ctg413□WAG-127D1  
ctg4062□ctg328□ctg413□WAG-128F16  
ctg4062□ctg389□□WAG-109H15  
ctg4062□ctg389□ctg295□WAG-1M8  
ctg4062□ctg389□ctg295□WAG-15E3  
ctg4062□ctg389□ctg295□WAG-36A2  
ctg4062□ctg389□ctg295□WAG-61G23  
ctg4062□ctg389□ctg295□WAG-67J16  
ctg4062□ctg389□ctg295□WAG-75L19  
ctg4062□ctg389□ctg295□WAG-86L17  
ctg4062□ctg389□ctg295□WAG-89P12  
ctg4062□ctg389□ctg295□WAG-91J10  
ctg4062□ctg389□ctg295□WAG-112G11  
ctg4062□ctg4799□□WAG-32I20  
ctg4062□ctg4799□ctg6903□WAG-11D7  
ctg4062□ctg4799□ctg6903□WAG-74B1  
ctg4063□□□WAG-2M6  
ctg4063□□□WAG-48I1  
ctg4063□□□WAG-86P17  
ctg4063□□□WAG-97N22  
ctg4063□□□WAG-100P19  
ctg4063□□□WAG-114C22  
ctg4063□ctg106□□WAG-10A4  
ctg4063□ctg106□ctg107□WAG-4F17  
ctg4063□ctg106□ctg107□WAG-5P6  
ctg4063□ctg106□ctg107□WAG-27B19  
ctg4063□ctg106□ctg107□WAG-29L10  
ctg4063□ctg106□ctg107□WAG-51B19  
ctg4063□ctg106□ctg107□WAG-52K16  
ctg4063□ctg106□ctg107□WAG-68K17  
ctg4063□ctg106□ctg107□WAG-87G11  
ctg4063□ctg106□ctg107□WAG-89L2  
ctg4063□ctg106□ctg107□WAG-94G19  
ctg4063□ctg106□ctg107□WAG-106P12  
ctg4063□ctg106□ctg107□WAG-113O14  
ctg4063□ctg106□ctg107□WAG-130H22  
ctg4063□ctg106□ctg159□WAG-10N12  
ctg4063□ctg106□ctg159□WAG-28N13  
ctg4063□ctg106□ctg159□WAG-37H18  
ctg4063□ctg106□ctg159□WAG-76M23

ctg4063□ctg106□ctg159□WAG-78I19  
ctg4063□ctg106□ctg159□WAG-79D3  
ctg4063□ctg106□ctg159□WAG-84A11  
ctg4063□ctg106□ctg159□WAG-87C21  
ctg4063□ctg106□ctg159□WAG-95A2  
ctg4063□ctg106□ctg159□WAG-95D5  
ctg4063□ctg106□ctg159□WAG-124H2  
ctg4063□ctg106□ctg159□WAG-129B21  
ctg4063□ctg106□ctg159□WAG-130K20  
ctg4063□ctg230□□WAG-46L5  
ctg4063□ctg230□□WAG-85D15  
ctg4063□ctg230□□WAG-98B16  
ctg4063□ctg230□□WAG-104E23  
ctg4063□ctg230□□WAG-111P24  
ctg4063□ctg230□ctg1575□WAG-5G7  
ctg4063□ctg230□ctg1575□WAG-14P1  
ctg4063□ctg230□ctg1575□WAG-15M18  
ctg4063□ctg230□ctg1575□WAG-28L16  
ctg4063□ctg230□ctg1575□WAG-47E3  
ctg4063□ctg230□ctg1575□WAG-62K1  
ctg4063□ctg230□ctg1575□WAG-62O12  
ctg4063□ctg230□ctg1575□WAG-76H10  
ctg4063□ctg230□ctg1575□WAG-119D10  
ctg4063□ctg230□ctg1575□WAG-128H19  
ctg4063□ctg230□ctg245□WAG-7K14  
ctg4063□ctg230□ctg245□WAG-7L17  
ctg4063□ctg230□ctg245□WAG-22F18  
ctg4063□ctg230□ctg245□WAG-35P5  
ctg4063□ctg230□ctg245□WAG-47C12  
ctg4063□ctg230□ctg245□WAG-73F6  
ctg4063□ctg230□ctg245□WAG-106H23  
ctg4063□ctg230□ctg245□WAG-113N2  
ctg4063□ctg230□ctg245□WAG-118K6  
ctg4063□ctg3508□□WAG-18G23  
ctg4063□ctg3508□□WAG-34I19  
ctg4063□ctg3508□□WAG-67I8  
ctg4063□ctg3508□ctg6763□WAG-42D21  
ctg4063□ctg3508□ctg6763□WAG-46N16  
ctg4063□ctg629□□WAG-11N21  
ctg4063□ctg629□□WAG-58C13  
ctg4063□ctg629□□WAG-121D15  
ctg4063□ctg629□ctg1169□WAG-23N17  
ctg4063□ctg629□ctg1169□WAG-25I13  
ctg4063□ctg629□ctg1169□WAG-55D1  
ctg4063□ctg629□ctg1169□WAG-69H21  
ctg4063□ctg629□ctg1169□WAG-76D3  
ctg4063□ctg629□ctg1169□WAG-85C9  
ctg4063□ctg629□ctg1169□WAG-88M16  
ctg4063□ctg629□ctg1169□WAG-118G24  
ctg4063□ctg93□ctg79□WAG-28M4  
ctg4063□ctg93□ctg79□WAG-33G24  
ctg4063□ctg93□ctg79□WAG-38L16  
ctg4063□ctg93□ctg79□WAG-39O12  
ctg4063□ctg93□ctg79□WAG-44L5  
ctg4063□ctg93□ctg79□WAG-50B16  
ctg4063□ctg93□ctg79□WAG-69N10

ctg4063□ctg93□ctg79□WAG-79C8  
ctg4063□ctg93□ctg79□WAG-91H17  
ctg4063□ctg93□ctg79□WAG-103A16  
ctg4063□ctg93□ctg79□WAG-126L3  
ctg4064□ctg2686□ctg2662□WAG-28N9  
ctg4064□ctg2686□ctg2662□WAG-50L5  
ctg4064□ctg2686□ctg2662□WAG-111J8  
ctg4064□ctg3740□ctg3971□WAG-35E19  
ctg4064□ctg3740□ctg3971□WAG-73G18  
ctg4064□ctg3740□ctg3971□WAG-74P1  
ctg4065□□□WAG-72A16  
ctg4065□□□WAG-117L11  
ctg4065□ctg1496□ctg1768□WAG-35I20  
ctg4065□ctg1496□ctg1768□WAG-51O7  
ctg4065□ctg1496□ctg1768□WAG-83N23  
ctg4065□ctg1496□ctg1768□WAG-91F22  
ctg4065□ctg1496□ctg1768□WAG-93B5  
ctg4065□ctg1496□ctg1768□WAG-106H20  
ctg4065□ctg1496□ctg1768□WAG-117C1  
ctg4065□ctg1496□ctg1768□WAG-130H15  
ctg4065□ctg1845□□□WAG-79F18  
ctg4065□ctg1845□ctg2381□WAG-8J11  
ctg4065□ctg1845□ctg2381□WAG-16G3  
ctg4065□ctg1845□ctg2381□WAG-28I2  
ctg4065□ctg1845□ctg2381□WAG-84C1  
ctg4065□ctg1845□ctg2381□WAG-89I7  
ctg4065□ctg1845□ctg2577□WAG-5G16  
ctg4065□ctg1845□ctg2577□WAG-35I14  
ctg4065□ctg1845□ctg2577□WAG-40N4  
ctg4065□ctg3046□□□WAG-43D5  
ctg4065□ctg3046□ctg3588□WAG-66P13  
ctg4065□ctg3046□ctg3588□WAG-122I22  
ctg4065□ctg3046□ctg3588□WAG-127I3  
ctg4065□ctg479□□□WAG-57K18  
ctg4065□ctg479□□□WAG-97L15  
ctg4065□ctg479□ctg828□WAG-15H3  
ctg4065□ctg479□ctg828□WAG-18H7  
ctg4065□ctg479□ctg828□WAG-36I14  
ctg4065□ctg479□ctg828□WAG-41I24  
ctg4065□ctg479□ctg828□WAG-47I5  
ctg4065□ctg479□ctg828□WAG-49H15  
ctg4065□ctg479□ctg828□WAG-55G1  
ctg4065□ctg479□ctg828□WAG-59C7  
ctg4065□ctg479□ctg828□WAG-76O17  
ctg4065□ctg479□ctg828□WAG-80P10  
ctg4065□ctg479□ctg828□WAG-84H23  
ctg4065□ctg479□ctg828□WAG-87P21  
ctg4065□ctg479□ctg828□WAG-111P1  
ctg4065□ctg758□□□WAG-6H15  
ctg4065□ctg758□□□WAG-27C19  
ctg4065□ctg758□ctg1066□WAG-4G13  
ctg4065□ctg758□ctg1066□WAG-11B16  
ctg4065□ctg758□ctg1066□WAG-28F14  
ctg4065□ctg758□ctg1066□WAG-42B11  
ctg4065□ctg758□ctg1066□WAG-74O6  
ctg4065□ctg758□ctg1066□WAG-105C5

ctg4065□ctg758□ctg6927□WAG-83H1  
ctg4065□ctg758□ctg6927□WAG-93F18  
ctg4065□ctg805□□WAG-14O2  
ctg4065□ctg805□□WAG-20A18  
ctg4065□ctg805□ctg1162□WAG-67D12  
ctg4065□ctg805□ctg1162□WAG-72K6  
ctg4065□ctg805□ctg1162□WAG-106P9  
ctg4065□ctg805□ctg1162□WAG-108B12  
ctg4065□ctg805□ctg1162□WAG-119K18  
ctg4065□ctg805□ctg1162□WAG-130H18  
ctg4065□ctg805□ctg2139□WAG-6B11  
ctg4065□ctg805□ctg2139□WAG-20M11  
ctg4065□ctg805□ctg2139□WAG-22G1  
ctg4065□ctg805□ctg2139□WAG-62L18  
ctg4065□ctg805□ctg2139□WAG-121B10  
ctg4066□□□WAG-33D6  
ctg4066□□□WAG-73E4  
ctg4066□ctg1154□ctg988□WAG-14A12  
ctg4066□ctg1154□ctg988□WAG-25L3  
ctg4066□ctg1154□ctg988□WAG-60I12  
ctg4066□ctg1154□ctg988□WAG-114O11  
ctg4066□ctg197□ctg206□WAG-2H15  
ctg4066□ctg197□ctg206□WAG-54L8  
ctg4066□ctg197□ctg206□WAG-57F15  
ctg4066□ctg197□ctg206□WAG-62J3  
ctg4066□ctg197□ctg206□WAG-64I6  
ctg4066□ctg197□ctg206□WAG-67A12  
ctg4066□ctg197□ctg206□WAG-78K5  
ctg4066□ctg197□ctg206□WAG-82K3  
ctg4066□ctg197□ctg206□WAG-82P20  
ctg4066□ctg197□ctg206□WAG-91L24  
ctg4066□ctg197□ctg206□WAG-129F17  
ctg4066□ctg3501□□WAG-33I8  
ctg4066□ctg3501□□WAG-64I5  
ctg4066□ctg3501□□WAG-82J18  
ctg4066□ctg3501□□WAG-86A6  
ctg4066□ctg3595□□WAG-19L7  
ctg4066□ctg3595□□WAG-51J22  
ctg4066□ctg3595□ctg5940□WAG-28A7  
ctg4066□ctg3595□ctg5940□WAG-102P16  
ctg4067□□□WAG-50A9  
ctg4067□ctg768□□WAG-31D19  
ctg4067□ctg768□□WAG-41P2  
ctg4067□ctg768□□WAG-91D17  
ctg4067□ctg768□ctg1054□WAG-15G18  
ctg4067□ctg768□ctg1054□WAG-55L7  
ctg4067□ctg768□ctg1054□WAG-58J23  
ctg4067□ctg768□ctg1054□WAG-79I3  
ctg4067□ctg768□ctg1054□WAG-82O1  
ctg4067□ctg768□ctg1054□WAG-87L12  
ctg4067□ctg768□ctg1054□WAG-92N7  
ctg4067□ctg768□ctg2015□WAG-14I8  
ctg4067□ctg768□ctg2015□WAG-42E3  
ctg4067□ctg768□ctg2015□WAG-49C17  
ctg4067□ctg768□ctg2015□WAG-59F2  
ctg4067□ctg768□ctg2015□WAG-122O5

ctg4067□ctg768□ctg2015□WAG-130B22  
ctg4067□ctg768□ctg2836□WAG-8K19  
ctg4067□ctg768□ctg2836□WAG-16P10  
ctg4067□ctg768□ctg2836□WAG-36J16  
ctg4067□ctg768□ctg2836□WAG-68H11  
ctg4067□ctg768□ctg2836□WAG-121B23  
ctg4068□□□WAG-38N20  
ctg4068□ctg10□ctg1520□WAG-13E6  
ctg4068□ctg10□ctg1520□WAG-19I1  
ctg4068□ctg10□ctg1520□WAG-29E3  
ctg4068□ctg10□ctg1520□WAG-97M15  
ctg4068□ctg10□ctg1520□WAG-127N4  
ctg4068□ctg10□ctg2783□WAG-32K22  
ctg4068□ctg10□ctg2783□WAG-46M12  
ctg4068□ctg10□ctg2783□WAG-66I13  
ctg4068□ctg10□ctg5718□WAG-88O16  
ctg4068□ctg10□ctg5718□WAG-117C14  
ctg4068□ctg10□ctg9□WAG-3E16  
ctg4068□ctg10□ctg9□WAG-28D4  
ctg4068□ctg10□ctg9□WAG-28G19  
ctg4068□ctg10□ctg9□WAG-33O5  
ctg4068□ctg10□ctg9□WAG-34G11  
ctg4068□ctg10□ctg9□WAG-39P6  
ctg4068□ctg10□ctg9□WAG-64O9  
ctg4068□ctg10□ctg9□WAG-64P4  
ctg4068□ctg10□ctg9□WAG-69M10  
ctg4068□ctg10□ctg9□WAG-77P6  
ctg4068□ctg10□ctg9□WAG-87D1  
ctg4068□ctg10□ctg9□WAG-94M9  
ctg4068□ctg10□ctg9□WAG-104D16  
ctg4068□ctg10□ctg9□WAG-105O4  
ctg4068□ctg10□ctg9□WAG-106P14  
ctg4068□ctg10□ctg9□WAG-107G18  
ctg4068□ctg10□ctg9□WAG-109D8  
ctg4068□ctg10□ctg9□WAG-114D12  
ctg4068□ctg10□ctg9□WAG-117L14  
ctg4068□ctg10□ctg9□WAG-128N21  
ctg4068□ctg1606□ctg1453□WAG-54L3  
ctg4068□ctg1606□ctg1453□WAG-83F1  
ctg4068□ctg1606□ctg1453□WAG-84C5  
ctg4068□ctg1606□ctg1453□WAG-97H1  
ctg4068□ctg1606□ctg1453□WAG-107I18  
ctg4069□□□WAG-6G1  
ctg4069□□□WAG-74C19  
ctg4069□□□WAG-81P24  
ctg4069□ctg2127□ctg2704□WAG-33M16  
ctg4069□ctg2127□ctg2704□WAG-42O11  
ctg4069□ctg2127□ctg2704□WAG-124M13  
ctg4069□ctg2127□ctg5941□WAG-22M13  
ctg4069□ctg2127□ctg5941□WAG-41O15  
ctg4069□ctg2839□□□WAG-23J6  
ctg4069□ctg2839□□□WAG-40L21  
ctg4069□ctg2839□ctg3542□WAG-55D14  
ctg4069□ctg2839□ctg3542□WAG-114L11  
ctg4069□ctg532□ctg435□WAG-1L11  
ctg4069□ctg532□ctg435□WAG-21A13



ctg4069□ctg532□ctg435□WAG-94C9  
ctg4069□ctg532□ctg435□WAG-107C11  
ctg4069□ctg532□ctg435□WAG-108A7  
ctg4069□ctg532□ctg435□WAG-109D9  
ctg4069□ctg5577□□WAG-35N10  
ctg4069□ctg5577□□WAG-39A9  
ctg4069□ctg978□□WAG-18D13  
ctg4069□ctg978□ctg823□WAG-39F17  
ctg4069□ctg978□ctg823□WAG-50J18  
ctg4069□ctg978□ctg823□WAG-81H21  
ctg4069□ctg978□ctg823□WAG-84J18  
ctg407□ctg955□□WAG-47M14  
ctg407□ctg955□ctg893□WAG-49E14  
ctg407□ctg955□ctg893□WAG-85N14  
ctg407□ctg955□ctg893□WAG-90K11  
ctg407□ctg955□ctg893□WAG-103D12  
ctg4070□□□WAG-29B21  
ctg4070□□□WAG-71O23  
ctg4070□ctg221□□WAG-3H21  
ctg4070□ctg221□□WAG-25O24  
ctg4070□ctg221□□WAG-99B17  
ctg4070□ctg221□ctg294□WAG-10B12  
ctg4070□ctg221□ctg294□WAG-15G12  
ctg4070□ctg221□ctg294□WAG-22I7  
ctg4070□ctg221□ctg294□WAG-38J24  
ctg4070□ctg221□ctg294□WAG-40G2  
ctg4070□ctg221□ctg294□WAG-52N13  
ctg4070□ctg221□ctg294□WAG-53K21  
ctg4070□ctg221□ctg294□WAG-64C14  
ctg4070□ctg221□ctg294□WAG-67A11  
ctg4070□ctg221□ctg294□WAG-71H3  
ctg4070□ctg221□ctg294□WAG-80H7  
ctg4070□ctg221□ctg294□WAG-109L4  
ctg4070□ctg221□ctg294□WAG-112O16  
ctg4070□ctg221□ctg294□WAG-129L24  
ctg4070□ctg221□ctg6878□WAG-22N14  
ctg4070□ctg221□ctg6878□WAG-71N15  
ctg4070□ctg3241□□WAG-108L9  
ctg4070□ctg3241□ctg4277□WAG-25H13  
ctg4070□ctg3241□ctg4277□WAG-73F21  
ctg4070□ctg3241□ctg4277□WAG-80J24  
ctg4071□□□WAG-20H21  
ctg4071□□□WAG-125H11  
ctg4071□ctg1183□□WAG-87E11  
ctg4071□ctg1183□ctg1325□WAG-17E22  
ctg4071□ctg1183□ctg1325□WAG-48P14  
ctg4071□ctg1183□ctg1325□WAG-60E11  
ctg4071□ctg1183□ctg1325□WAG-80L4  
ctg4071□ctg1183□ctg1325□WAG-88M14  
ctg4071□ctg1183□ctg1325□WAG-105G17  
ctg4071□ctg1183□ctg1325□WAG-128N10  
ctg4071□ctg1354□□WAG-20N18  
ctg4071□ctg1354□ctg1199□WAG-15K16  
ctg4071□ctg1354□ctg1199□WAG-30E3  
ctg4071□ctg1354□ctg1199□WAG-38L15  
ctg4071□ctg1354□ctg1199□WAG-80H2

ctg4071□ctg1354□ctg1199□WAG-106K23  
ctg4071□ctg4402□ctg4570□WAG-120B16  
ctg4071□ctg4402□ctg4570□WAG-124C18  
ctg4072□ctg2795□□WAG-87H13  
ctg4072□ctg2795□ctg3600□WAG-17I3  
ctg4072□ctg2795□ctg3600□WAG-24M6  
ctg4072□ctg2795□ctg3600□WAG-46P17  
ctg4072□ctg4027□□WAG-113B24  
ctg4072□ctg4027□ctg5808□WAG-19B24  
ctg4072□ctg4027□ctg5808□WAG-57C8  
ctg4072□ctg924□□WAG-87N20  
ctg4072□ctg924□ctg904□WAG-39P12  
ctg4072□ctg924□ctg904□WAG-59H2  
ctg4072□ctg924□ctg904□WAG-69G19  
ctg4072□ctg924□ctg904□WAG-104O10  
ctg4073□□□WAG-5N7  
ctg4073□□□WAG-13H21  
ctg4073□□□WAG-21M24  
ctg4073□□□WAG-30C8  
ctg4073□□□WAG-30G16  
ctg4073□□□WAG-35I18  
ctg4073□□□WAG-36F6  
ctg4073□□□WAG-38B12  
ctg4073□□□WAG-39L1  
ctg4073□□□WAG-41C3  
ctg4073□□□WAG-43E19  
ctg4073□□□WAG-62I17  
ctg4073□□□WAG-75N17  
ctg4073□□□WAG-96E9  
ctg4073□□□WAG-100G16  
ctg4073□□□WAG-114O19  
ctg4073□ctg2075□ctg1932□WAG-39D14  
ctg4073□ctg2075□ctg1932□WAG-46L19  
ctg4073□ctg2075□ctg1932□WAG-85D7  
ctg4073□ctg2075□ctg1932□WAG-130H21  
ctg4073□ctg3072□□WAG-129G12  
ctg4073□ctg3072□ctg4189□WAG-64L5  
ctg4073□ctg3072□ctg4189□WAG-91O7  
ctg4073□ctg3437□□WAG-3M20  
ctg4073□ctg3437□ctg3553□WAG-8E3  
ctg4073□ctg3437□ctg3553□WAG-49I14  
ctg4073□ctg3437□ctg3553□WAG-65A16  
ctg4073□ctg3774□ctg4025□WAG-48N19  
ctg4073□ctg3774□ctg4025□WAG-130P15  
ctg4073□ctg4559□ctg4697□WAG-82L8  
ctg4073□ctg4559□ctg4697□WAG-127H10  
ctg4073□ctg5442□ctg6481□WAG-63J20  
ctg4073□ctg5442□ctg6481□WAG-70A14  
ctg4073□ctg562□ctg592□WAG-31A18  
ctg4073□ctg562□ctg592□WAG-48O14  
ctg4073□ctg562□ctg592□WAG-84I11  
ctg4073□ctg562□ctg592□WAG-92C24  
ctg4073□ctg562□ctg592□WAG-94J10  
ctg4073□ctg562□ctg592□WAG-98P11  
ctg4073□ctg562□ctg592□WAG-105M14  
ctg4073□ctg562□ctg592□WAG-110P4

ctg4073□ctg562□ctg592□WAG-118I9  
ctg4073□ctg562□ctg592□WAG-128D2  
ctg4073□ctg562□ctg592□WAG-129P12  
ctg4073□ctg562□ctg592□WAG-130G23  
ctg4073□ctg6139□□WAG-70I13  
ctg4073□ctg6139□□WAG-76B9  
ctg4073□ctg664□□WAG-23I20  
ctg4073□ctg664□□WAG-76E18  
ctg4073□ctg664□□WAG-100A8  
ctg4073□ctg664□□WAG-108N19  
ctg4073□ctg664□ctg888□WAG-19M21  
ctg4073□ctg664□ctg888□WAG-53E4  
ctg4073□ctg664□ctg888□WAG-56O14  
ctg4073□ctg664□ctg888□WAG-59E5  
ctg4073□ctg664□ctg888□WAG-59N6  
ctg4073□ctg664□ctg888□WAG-62I18  
ctg4073□ctg664□ctg888□WAG-75A23  
ctg4073□ctg664□ctg888□WAG-93F23  
ctg4073□ctg664□ctg888□WAG-104G1  
ctg4073□ctg664□ctg888□WAG-105N5  
ctg4073□ctg664□ctg888□WAG-125I14  
ctg4073□ctg719□ctg578□WAG-3L22  
ctg4073□ctg719□ctg578□WAG-24O11  
ctg4073□ctg719□ctg578□WAG-28A1  
ctg4073□ctg719□ctg578□WAG-41E15  
ctg4073□ctg719□ctg578□WAG-42J4  
ctg4073□ctg719□ctg578□WAG-73O16  
ctg4073□ctg719□ctg578□WAG-75C9  
ctg4073□ctg719□ctg578□WAG-76M9  
ctg4073□ctg719□ctg578□WAG-76N4  
ctg4073□ctg719□ctg578□WAG-78D24  
ctg4073□ctg719□ctg578□WAG-97N18  
ctg4073□ctg719□ctg578□WAG-100K16  
ctg4073□ctg719□ctg578□WAG-106L14  
ctg4073□ctg719□ctg578□WAG-108E24  
ctg4073□ctg719□ctg578□WAG-114N6  
ctg4073□ctg719□ctg578□WAG-128K14  
ctg4073□ctg802□□WAG-32A21  
ctg4073□ctg802□□WAG-54O5  
ctg4073□ctg802□□WAG-82D1  
ctg4073□ctg802□ctg1125□WAG-8I14  
ctg4073□ctg802□ctg1125□WAG-20N14  
ctg4073□ctg802□ctg1125□WAG-43C23  
ctg4073□ctg802□ctg1125□WAG-56M9  
ctg4073□ctg802□ctg1125□WAG-75I22  
ctg4073□ctg802□ctg1125□WAG-116O1  
ctg4073□ctg802□ctg1125□WAG-121B14  
ctg4073□ctg802□ctg1686□WAG-55M23  
ctg4073□ctg802□ctg1686□WAG-57J14  
ctg4073□ctg802□ctg1686□WAG-99L1  
ctg4073□ctg802□ctg1686□WAG-104J8  
ctg4074□ctg2887□ctg2878□WAG-34L16  
ctg4074□ctg2887□ctg2878□WAG-68L6  
ctg4074□ctg2887□ctg2878□WAG-118I7  
ctg4074□ctg2887□ctg2878□WAG-130D3  
ctg4074□ctg447□□WAG-12D7

ctg4074□ctg447□ctg457□WAG-10C14  
ctg4074□ctg447□ctg457□WAG-70M20  
ctg4074□ctg447□ctg457□WAG-78O21  
ctg4074□ctg447□ctg457□WAG-95L22  
ctg4074□ctg447□ctg457□WAG-114P24  
ctg4074□ctg447□ctg457□WAG-125K13  
ctg4074□ctg6255□□WAG-43O10  
ctg4074□ctg6255□□WAG-130A11  
ctg4075□□□WAG-13O4  
ctg4075□□□WAG-18H8  
ctg4075□□□WAG-35E16  
ctg4075□□□WAG-36F18  
ctg4075□□□WAG-73O2  
ctg4075□ctg1158□ctg1300□WAG-17M16  
ctg4075□ctg1158□ctg1300□WAG-59G17  
ctg4075□ctg1158□ctg1300□WAG-85H18  
ctg4075□ctg1158□ctg1300□WAG-111E18  
ctg4075□ctg1158□ctg2870□WAG-32G12  
ctg4075□ctg1158□ctg2870□WAG-64L19  
ctg4075□ctg1517□□WAG-96O2  
ctg4075□ctg1517□ctg1804□WAG-64H5  
ctg4075□ctg1517□ctg1804□WAG-65C22  
ctg4075□ctg1517□ctg1804□WAG-76C17  
ctg4075□ctg1517□ctg1804□WAG-84L19  
ctg4075□ctg1517□ctg5342□WAG-90I14  
ctg4075□ctg1517□ctg5342□WAG-110O2  
ctg4075□ctg1798□□WAG-86H2  
ctg4075□ctg1798□□WAG-103C3  
ctg4075□ctg1798□ctg2260□WAG-21C12  
ctg4075□ctg1798□ctg2260□WAG-27H24  
ctg4075□ctg1798□ctg2260□WAG-71G4  
ctg4075□ctg1798□ctg2260□WAG-84K12  
ctg4075□ctg2318□□WAG-2I21  
ctg4075□ctg2318□□WAG-99C20  
ctg4075□ctg2318□ctg3613□WAG-15F8  
ctg4075□ctg2318□ctg3613□WAG-16I12  
ctg4075□ctg2318□ctg3613□WAG-116H19  
ctg4075□ctg2318□ctg4683□WAG-56J16  
ctg4075□ctg2318□ctg4683□WAG-66D15  
ctg4075□ctg2318□ctg4683□WAG-103A13  
ctg4075□ctg3238□ctg3428□WAG-24B13  
ctg4075□ctg3238□ctg3428□WAG-32A12  
ctg4075□ctg3238□ctg3428□WAG-51G17  
ctg4075□ctg3238□ctg3428□WAG-99F8  
ctg4076□□□WAG-28F12  
ctg4076□□□WAG-31N6  
ctg4076□□□WAG-53B7  
ctg4076□□□WAG-57M14  
ctg4076□□□WAG-60F10  
ctg4076□□□WAG-68B2  
ctg4076□□□WAG-119F21  
ctg4076□□□WAG-128K24  
ctg4076□ctg1276□□WAG-28F3  
ctg4076□ctg1276□ctg1426□WAG-12C3  
ctg4076□ctg1276□ctg1426□WAG-31C5  
ctg4076□ctg1276□ctg1426□WAG-49J14

ctg4076□ctg1276□ctg1426□WAG-95H23  
ctg4076□ctg1276□ctg1426□WAG-121G2  
ctg4076□ctg2295□□WAG-25D24  
ctg4076□ctg2295□ctg2845□WAG-7F10  
ctg4076□ctg2295□ctg2845□WAG-94I15  
ctg4076□ctg2295□ctg2845□WAG-124I10  
ctg4076□ctg2295□ctg3409□WAG-9P12  
ctg4076□ctg2295□ctg3409□WAG-46A18  
ctg4076□ctg2295□ctg3409□WAG-74L20  
ctg4076□ctg2295□ctg4746□WAG-38M13  
ctg4076□ctg2295□ctg4746□WAG-75K14  
ctg4076□ctg2319□□WAG-2L21  
ctg4076□ctg2319□□WAG-50D24  
ctg4076□ctg2319□□WAG-80I18  
ctg4076□ctg2319□ctg3771□WAG-64H8  
ctg4076□ctg2319□ctg3771□WAG-81G10  
ctg4076□ctg2319□ctg5745□WAG-98B8  
ctg4076□ctg2319□ctg5745□WAG-118M2  
ctg4076□ctg2901□ctg2889□WAG-12J15  
ctg4076□ctg2901□ctg2889□WAG-33K2  
ctg4076□ctg2901□ctg2889□WAG-82C5  
ctg4076□ctg3296□□WAG-5H15  
ctg4076□ctg3296□ctg4362□WAG-15I13  
ctg4076□ctg3296□ctg4362□WAG-82L11  
ctg4076□ctg4670□ctg4834□WAG-13C15  
ctg4076□ctg4670□ctg4834□WAG-108B7  
ctg4076□ctg5608□□WAG-33H8  
ctg4076□ctg5608□□WAG-96J1  
ctg4076□ctg6190□□WAG-39D24  
ctg4076□ctg6190□□WAG-64J20  
ctg4076□ctg67□□WAG-108E3  
ctg4076□ctg67□ctg128□WAG-3K4  
ctg4076□ctg67□ctg128□WAG-31J23  
ctg4076□ctg67□ctg128□WAG-36G10  
ctg4076□ctg67□ctg128□WAG-40I11  
ctg4076□ctg67□ctg128□WAG-42K11  
ctg4076□ctg67□ctg128□WAG-46I10  
ctg4076□ctg67□ctg128□WAG-54D9  
ctg4076□ctg67□ctg128□WAG-65F11  
ctg4076□ctg67□ctg128□WAG-66F8  
ctg4076□ctg67□ctg128□WAG-66O14  
ctg4076□ctg67□ctg128□WAG-78B5  
ctg4076□ctg67□ctg128□WAG-86F18  
ctg4076□ctg67□ctg128□WAG-95I4  
ctg4076□ctg67□ctg128□WAG-100C1  
ctg4076□ctg67□ctg128□WAG-109J20  
ctg4076□ctg67□ctg128□WAG-110F5  
ctg4076□ctg67□ctg128□WAG-130I19  
ctg4076□ctg957□□WAG-13G20  
ctg4076□ctg957□□WAG-60K13  
ctg4076□ctg957□ctg807□WAG-8F7  
ctg4076□ctg957□ctg807□WAG-18B20  
ctg4076□ctg957□ctg807□WAG-46A23  
ctg4076□ctg957□ctg807□WAG-63P16  
ctg4076□ctg957□ctg807□WAG-75H14  
ctg4076□ctg957□ctg807□WAG-98E17

ctg4076□ctg957□ctg807□WAG-105M23  
ctg4076□ctg957□ctg807□WAG-126A13  
ctg4077□□□WAG-115I3  
ctg4077□ctg602□□WAG-20J10  
ctg4077□ctg602□□WAG-43F6  
ctg4077□ctg602□□WAG-115C3  
ctg4077□ctg602□ctg1988□WAG-11J21  
ctg4077□ctg602□ctg1988□WAG-39J4  
ctg4077□ctg602□ctg1988□WAG-64B12  
ctg4077□ctg602□ctg1988□WAG-78K3  
ctg4077□ctg602□ctg1988□WAG-98P18  
ctg4077□ctg602□ctg1988□WAG-99J11  
ctg4077□ctg602□ctg1988□WAG-104D18  
ctg4077□ctg602□ctg1988□WAG-122P16  
ctg4077□ctg602□ctg537□WAG-C7  
ctg4077□ctg602□ctg537□WAG-6K17  
ctg4077□ctg602□ctg537□WAG-6L1  
ctg4077□ctg602□ctg537□WAG-14B4  
ctg4077□ctg602□ctg537□WAG-15C23  
ctg4077□ctg602□ctg537□WAG-20G1  
ctg4077□ctg602□ctg537□WAG-24O21  
ctg4077□ctg602□ctg537□WAG-26B7  
ctg4077□ctg602□ctg537□WAG-51P11  
ctg4077□ctg602□ctg537□WAG-61E21  
ctg4077□ctg602□ctg537□WAG-95G4  
ctg4077□ctg602□ctg537□WAG-97D21  
ctg4077□ctg602□ctg537□WAG-100H12  
ctg4077□ctg602□ctg537□WAG-109G2  
ctg4077□ctg602□ctg537□WAG-121N23  
ctg4077□ctg602□ctg537□WAG-127G17  
ctg4078□□□WAG-121B17  
ctg4078□ctg2023□ctg1869□WAG-22F12  
ctg4078□ctg2023□ctg1869□WAG-91E16  
ctg4078□ctg2023□ctg1869□WAG-130P13  
ctg4078□ctg47□□WAG-6H1  
ctg4078□ctg47□ctg3093□WAG-14H2  
ctg4078□ctg47□ctg3093□WAG-66D4  
ctg4078□ctg47□ctg3093□WAG-119O8  
ctg4078□ctg47□ctg3642□WAG-64H7  
ctg4078□ctg47□ctg3642□WAG-113G4  
ctg4078□ctg47□ctg3642□WAG-125O6  
ctg4078□ctg47□ctg74□WAG-10J15  
ctg4078□ctg47□ctg74□WAG-18D17  
ctg4078□ctg47□ctg74□WAG-19G24  
ctg4078□ctg47□ctg74□WAG-20H24  
ctg4078□ctg47□ctg74□WAG-23F18  
ctg4078□ctg47□ctg74□WAG-31E11  
ctg4078□ctg47□ctg74□WAG-32E22  
ctg4078□ctg47□ctg74□WAG-33J19  
ctg4078□ctg47□ctg74□WAG-35O13  
ctg4078□ctg47□ctg74□WAG-36A5  
ctg4078□ctg47□ctg74□WAG-38P15  
ctg4078□ctg47□ctg74□WAG-44E19  
ctg4078□ctg47□ctg74□WAG-50J16  
ctg4078□ctg47□ctg74□WAG-50K16  
ctg4078□ctg47□ctg74□WAG-56F2

ctg4078□ctg47□ctg74□WAG-57M8  
ctg4078□ctg47□ctg74□WAG-69D1  
ctg4078□ctg47□ctg74□WAG-75P12  
ctg4078□ctg47□ctg74□WAG-88P23  
ctg4078□ctg47□ctg74□WAG-101D8  
ctg4078□ctg47□ctg74□WAG-109A4  
ctg4078□ctg47□ctg74□WAG-119L22  
ctg4078□ctg5213□ctg5962□WAG-82I11  
ctg4078□ctg5213□ctg5962□WAG-96C11  
ctg4078□ctg792□□WAG-E7  
ctg4078□ctg792□□WAG-57J8  
ctg4078□ctg792□□WAG-97O9  
ctg4078□ctg792□ctg649□WAG-20J6  
ctg4078□ctg792□ctg649□WAG-84N2  
ctg4078□ctg792□ctg649□WAG-109K15  
ctg4078□ctg792□ctg649□WAG-110J6  
ctg4078□ctg792□ctg649□WAG-113A6  
ctg4078□ctg792□ctg649□WAG-114K13  
ctg4078□ctg792□ctg649□WAG-123E21  
ctg4079□ctg260□□WAG-81N4  
ctg4079□ctg260□□WAG-85C18  
ctg4079□ctg260□□WAG-119O15  
ctg4079□ctg260□ctg1884□WAG-14D5  
ctg4079□ctg260□ctg1884□WAG-86I3  
ctg4079□ctg260□ctg1884□WAG-87K15  
ctg4079□ctg260□ctg1884□WAG-106K13  
ctg4079□ctg260□ctg3148□WAG-16K4  
ctg4079□ctg260□ctg3148□WAG-22I12  
ctg4079□ctg260□ctg3148□WAG-99N3  
ctg4079□ctg260□ctg3158□WAG-92A19  
ctg4079□ctg260□ctg3158□WAG-104G2  
ctg4079□ctg260□ctg3158□WAG-110A11  
ctg4079□ctg260□ctg340□WAG-1J10  
ctg4079□ctg260□ctg340□WAG-13B13  
ctg4079□ctg260□ctg340□WAG-17F8  
ctg4079□ctg260□ctg340□WAG-20D19  
ctg4079□ctg260□ctg340□WAG-21B12  
ctg4079□ctg260□ctg340□WAG-55J11  
ctg4079□ctg260□ctg340□WAG-77K20  
ctg4079□ctg260□ctg340□WAG-120C2  
ctg4079□ctg260□ctg340□WAG-120P18  
ctg4079□ctg260□ctg340□WAG-128E2  
ctg4079□ctg260□ctg340□WAG-128E15  
ctg4079□ctg260□ctg3584□WAG-36L9  
ctg4079□ctg260□ctg3584□WAG-60M1  
ctg4079□ctg260□ctg3584□WAG-67C18  
ctg4079□ctg260□ctg6319□WAG-7J23  
ctg4079□ctg260□ctg6319□WAG-76P11  
ctg408□□□WAG-31J20  
ctg408□ctg2780□□WAG-74J19  
ctg408□ctg2780□ctg3117□WAG-13A5  
ctg408□ctg2780□ctg3117□WAG-27L8  
ctg408□ctg2780□ctg3117□WAG-119O21  
ctg408□ctg2780□ctg4076□WAG-84F21  
ctg408□ctg2780□ctg4076□WAG-119J10  
ctg408□ctg2780□ctg4076□WAG-122N17

ctg408□ctg958□□WAG-63B13  
ctg408□ctg958□ctg808□WAG-47E12  
ctg408□ctg958□ctg808□WAG-80K11  
ctg408□ctg958□ctg808□WAG-90N11  
ctg408□ctg958□ctg808□WAG-93N10  
ctg408□ctg958□ctg808□WAG-118B3  
ctg408□ctg958□ctg808□WAG-121I15  
ctg4080□□□WAG-19B10  
ctg4080□□□WAG-24H22  
ctg4080□□□WAG-43H8  
ctg4080□□□WAG-104N5  
ctg4080□ctg1290□□WAG-43H22  
ctg4080□ctg1290□□WAG-71L5  
ctg4080□ctg1290□ctg1143□WAG-26F22  
ctg4080□ctg1290□ctg1143□WAG-47J22  
ctg4080□ctg1290□ctg1143□WAG-55P18  
ctg4080□ctg1290□ctg1143□WAG-110L6  
ctg4080□ctg1290□ctg1143□WAG-112A12  
ctg4080□ctg1290□ctg1143□WAG-125E16  
ctg4080□ctg1290□ctg5630□WAG-52K4  
ctg4080□ctg1290□ctg5630□WAG-130B4  
ctg4080□ctg502□ctg1437□WAG-34O8  
ctg4080□ctg502□ctg1437□WAG-45M7  
ctg4080□ctg502□ctg1437□WAG-73H20  
ctg4080□ctg502□ctg1437□WAG-79P7  
ctg4080□ctg502□ctg1437□WAG-111P15  
ctg4080□ctg502□ctg6115□WAG-30A15  
ctg4080□ctg502□ctg6115□WAG-64F11  
ctg4080□ctg502□ctg877□WAG-5G3  
ctg4080□ctg502□ctg877□WAG-17A19  
ctg4080□ctg502□ctg877□WAG-17N24  
ctg4080□ctg502□ctg877□WAG-44O8  
ctg4080□ctg502□ctg877□WAG-47K22  
ctg4080□ctg502□ctg877□WAG-48O23  
ctg4080□ctg502□ctg877□WAG-61G19  
ctg4080□ctg502□ctg877□WAG-76H7  
ctg4080□ctg502□ctg877□WAG-92L14  
ctg4080□ctg625□ctg653□WAG-2K11  
ctg4080□ctg625□ctg653□WAG-9I19  
ctg4080□ctg625□ctg653□WAG-29O15  
ctg4080□ctg625□ctg653□WAG-50M24  
ctg4080□ctg625□ctg653□WAG-68K20  
ctg4080□ctg625□ctg653□WAG-82J5  
ctg4080□ctg625□ctg653□WAG-108E2  
ctg4080□ctg625□ctg653□WAG-112H20  
ctg4080□ctg625□ctg653□WAG-114F14  
ctg4081□□□WAG-L3  
ctg4081□□□WAG-21G9  
ctg4081□□□WAG-28C19  
ctg4081□□□WAG-35O8  
ctg4081□□□WAG-47D20  
ctg4081□□□WAG-49J23  
ctg4081□□□WAG-63B7  
ctg4081□□□WAG-92G15  
ctg4081□□□WAG-116H16  
ctg4081□ctg1213□□WAG-23D4



ctg4081□ctg1213□□WAG-52F5  
ctg4081□ctg1213□□WAG-59J16  
ctg4081□ctg1213□ctg1657□WAG-15E9  
ctg4081□ctg1213□ctg1657□WAG-38D2  
ctg4081□ctg1213□ctg1657□WAG-50N12  
ctg4081□ctg1213□ctg1657□WAG-64D19  
ctg4081□ctg1213□ctg1657□WAG-66K14  
ctg4081□ctg1213□ctg1657□WAG-105K6  
ctg4081□ctg1213□ctg1657□WAG-107B12  
ctg4081□ctg1213□ctg6443□WAG-92F17  
ctg4081□ctg1213□ctg6443□WAG-122C20  
ctg4081□ctg50□□WAG-39M18  
ctg4081□ctg50□□WAG-63P10  
ctg4081□ctg50□□WAG-79C15  
ctg4081□ctg50□□WAG-117P13  
ctg4081□ctg50□ctg4725□WAG-17M8  
ctg4081□ctg50□ctg4725□WAG-33C14  
ctg4081□ctg50□ctg49□WAG-13C7  
ctg4081□ctg50□ctg49□WAG-25J24  
ctg4081□ctg50□ctg49□WAG-26C2  
ctg4081□ctg50□ctg49□WAG-40I14  
ctg4081□ctg50□ctg49□WAG-41H9  
ctg4081□ctg50□ctg49□WAG-42K9  
ctg4081□ctg50□ctg49□WAG-49H9  
ctg4081□ctg50□ctg49□WAG-51K8  
ctg4081□ctg50□ctg49□WAG-53J20  
ctg4081□ctg50□ctg49□WAG-59O5  
ctg4081□ctg50□ctg49□WAG-65N13  
ctg4081□ctg50□ctg49□WAG-93I10  
ctg4081□ctg50□ctg49□WAG-115O20  
ctg4081□ctg50□ctg49□WAG-123B24  
ctg4081□ctg50□ctg49□WAG-125L17  
ctg4081□ctg50□ctg5715□WAG-91A21  
ctg4081□ctg50□ctg5715□WAG-91P21  
ctg4081□ctg50□ctg90□WAG-8C24  
ctg4081□ctg50□ctg90□WAG-20E7  
ctg4081□ctg50□ctg90□WAG-43N7  
ctg4081□ctg50□ctg90□WAG-48N3  
ctg4081□ctg50□ctg90□WAG-49B23  
ctg4081□ctg50□ctg90□WAG-58O23  
ctg4081□ctg50□ctg90□WAG-79L18  
ctg4081□ctg50□ctg90□WAG-83E3  
ctg4081□ctg50□ctg90□WAG-83H9  
ctg4081□ctg50□ctg90□WAG-87F10  
ctg4081□ctg50□ctg90□WAG-87H6  
ctg4081□ctg50□ctg90□WAG-90G19  
ctg4081□ctg50□ctg90□WAG-100D12  
ctg4081□ctg50□ctg90□WAG-108F2  
ctg4081□ctg50□ctg90□WAG-116O11  
ctg4081□ctg50□ctg90□WAG-119M13  
ctg4081□ctg50□ctg90□WAG-123B11  
ctg4081□ctg50□ctg90□WAG-125C22  
ctg4082□□□WAG-56L6  
ctg4082□ctg417□□WAG-53E2  
ctg4082□ctg417□□WAG-62H4  
ctg4082□ctg417□ctg329□WAG-11P20

ctg4082□ctg417□ctg329□WAG-18L8  
ctg4082□ctg417□ctg329□WAG-42E1  
ctg4082□ctg417□ctg329□WAG-73A6  
ctg4082□ctg417□ctg329□WAG-102F17  
ctg4082□ctg417□ctg329□WAG-111H16  
ctg4082□ctg417□ctg329□WAG-120N4  
ctg4082□ctg4236□ctg6144□WAG-23K24  
ctg4082□ctg4236□ctg6144□WAG-28N15  
ctg4082□ctg4236□ctg6591□WAG-55A8  
ctg4082□ctg4236□ctg6591□WAG-126J10  
ctg4083□□□WAG-3H18  
ctg4083□ctg202□□WAG-3M19  
ctg4083□ctg202□□WAG-70H11  
ctg4083□ctg202□□WAG-76J14  
ctg4083□ctg202□ctg209□WAG-12P24  
ctg4083□ctg202□ctg209□WAG-23F12  
ctg4083□ctg202□ctg209□WAG-33M8  
ctg4083□ctg202□ctg209□WAG-46B11  
ctg4083□ctg202□ctg209□WAG-85F9  
ctg4083□ctg202□ctg209□WAG-100E8  
ctg4083□ctg202□ctg209□WAG-101P13  
ctg4083□ctg202□ctg209□WAG-107I6  
ctg4083□ctg202□ctg209□WAG-129P3  
ctg4083□ctg3493□ctg4691□WAG-20L21  
ctg4083□ctg3493□ctg4691□WAG-73D19  
ctg4083□ctg3493□ctg4887□WAG-3O1  
ctg4083□ctg3493□ctg4887□WAG-122C11  
ctg4083□ctg6450□□WAG-8M13  
ctg4083□ctg6450□□WAG-42B17  
ctg4084□□□WAG-38J9  
ctg4084□□□WAG-95A16  
ctg4084□ctg2331□□WAG-40C20  
ctg4084□ctg2331□ctg2894□WAG-62H14  
ctg4084□ctg2331□ctg2894□WAG-74I22  
ctg4084□ctg2331□ctg2894□WAG-104J6  
ctg4084□ctg2331□ctg4034□WAG-24O9  
ctg4084□ctg2331□ctg4034□WAG-87D7  
ctg4084□ctg6331□□WAG-93I15  
ctg4084□ctg6331□□WAG-128O18  
ctg4085□□□WAG-16I16  
ctg4085□□□WAG-18F1  
ctg4085□□□WAG-130F9  
ctg4085□ctg1938□□WAG-96M18  
ctg4085□ctg1938□ctg2309□WAG-61G8  
ctg4085□ctg1938□ctg2309□WAG-100D21  
ctg4085□ctg1938□ctg2309□WAG-105G12  
ctg4085□ctg1938□ctg6431□WAG-16J4  
ctg4085□ctg1938□ctg6431□WAG-96I10  
ctg4085□ctg245□□WAG-27E19  
ctg4085□ctg245□ctg252□WAG-7B12  
ctg4085□ctg245□ctg252□WAG-10K13  
ctg4085□ctg245□ctg252□WAG-19G1  
ctg4085□ctg245□ctg252□WAG-35L9  
ctg4085□ctg245□ctg252□WAG-60H16  
ctg4085□ctg245□ctg252□WAG-60O8  
ctg4085□ctg245□ctg252□WAG-69H6

ctg4085□ctg245□ctg252□WAG-82I12  
ctg4085□ctg245□ctg252□WAG-83C24  
ctg4085□ctg245□ctg252□WAG-84P23  
ctg4085□ctg245□ctg252□WAG-102F13  
ctg4085□ctg245□ctg252□WAG-116E19  
ctg4085□ctg245□ctg252□WAG-119N15  
ctg4085□ctg2518□□WAG-97K13  
ctg4085□ctg2518□ctg3276□WAG-33M24  
ctg4085□ctg2518□ctg3276□WAG-45B7  
ctg4085□ctg2518□ctg3276□WAG-62K16  
ctg4085□ctg3115□ctg3115□WAG-16M17  
ctg4085□ctg3115□ctg3115□WAG-41E2  
ctg4085□ctg3115□ctg3115□WAG-79C24  
ctg4085□ctg3787□□WAG-13B17  
ctg4085□ctg3787□ctg5311□WAG-K15  
ctg4085□ctg3787□ctg5311□WAG-30H3  
ctg4086□□□WAG-14J5  
ctg4086□□□WAG-18K22  
ctg4086□□□WAG-33N9  
ctg4086□□□WAG-36O2  
ctg4086□□□WAG-48M3  
ctg4086□□□WAG-102N12  
ctg4086□ctg1417□□WAG-64D1  
ctg4086□ctg1417□□WAG-98E14  
ctg4086□ctg1417□□WAG-98I23  
ctg4086□ctg1417□ctg1263□WAG-22L2  
ctg4086□ctg1417□ctg1263□WAG-37E4  
ctg4086□ctg1417□ctg1263□WAG-39D3  
ctg4086□ctg1417□ctg1263□WAG-71O17  
ctg4086□ctg1417□ctg1263□WAG-86G22  
ctg4086□ctg1417□ctg1263□WAG-103G7  
ctg4086□ctg1417□ctg1263□WAG-124C14  
ctg4086□ctg1417□ctg3547□WAG-11E22  
ctg4086□ctg1417□ctg3547□WAG-64A13  
ctg4086□ctg1417□ctg3547□WAG-88J18  
ctg4086□ctg1539□□WAG-82C18  
ctg4086□ctg1539□ctg1830□WAG-17B9  
ctg4086□ctg1539□ctg1830□WAG-22P9  
ctg4086□ctg1539□ctg1830□WAG-44B21  
ctg4086□ctg1539□ctg1830□WAG-64F14  
ctg4086□ctg1539□ctg1830□WAG-110J21  
ctg4086□ctg1539□ctg1830□WAG-124F9  
ctg4086□ctg355□□WAG-68M6  
ctg4086□ctg355□□WAG-79K11  
ctg4086□ctg355□□WAG-81M16  
ctg4086□ctg355□□WAG-129D15  
ctg4086□ctg355□ctg261□WAG-5L3  
ctg4086□ctg355□ctg261□WAG-28O18  
ctg4086□ctg355□ctg261□WAG-47G3  
ctg4086□ctg355□ctg261□WAG-55F1  
ctg4086□ctg355□ctg261□WAG-60A13  
ctg4086□ctg355□ctg261□WAG-114O15  
ctg4086□ctg355□ctg261□WAG-129C15  
ctg4086□ctg5865□□WAG-23L14  
ctg4086□ctg5865□□WAG-56C4  
ctg4086□ctg6069□□WAG-108J13

ctg4086□ctg6069□□WAG-130M9  
ctg4087□ctg336□□WAG-30G9  
ctg4087□ctg336□□WAG-52J19  
ctg4087□ctg336□□WAG-55I20  
ctg4087□ctg336□□WAG-117H8  
ctg4087□ctg336□ctg1662□WAG-12A18  
ctg4087□ctg336□ctg1662□WAG-48H5  
ctg4087□ctg336□ctg1662□WAG-71C6  
ctg4087□ctg336□ctg1662□WAG-119E15  
ctg4087□ctg336□ctg248□WAG-6B24  
ctg4087□ctg336□ctg248□WAG-17P19  
ctg4087□ctg336□ctg248□WAG-54B24  
ctg4087□ctg336□ctg248□WAG-66A18  
ctg4087□ctg336□ctg248□WAG-70E2  
ctg4087□ctg336□ctg248□WAG-99N16  
ctg4087□ctg336□ctg248□WAG-113O17  
ctg4087□ctg336□ctg248□WAG-115L19  
ctg4087□ctg336□ctg4654□WAG-35K7  
ctg4087□ctg336□ctg4654□WAG-55J9  
ctg4087□ctg336□ctg4654□WAG-89A8  
ctg4087□ctg336□ctg940□WAG-11P13  
ctg4087□ctg336□ctg940□WAG-40J3  
ctg4087□ctg336□ctg940□WAG-53L21  
ctg4087□ctg336□ctg940□WAG-53N18  
ctg4087□ctg336□ctg940□WAG-120M19  
ctg4087□ctg5707□□WAG-11F9  
ctg4087□ctg5707□□WAG-18G10  
ctg4087□ctg6337□□WAG-19L6  
ctg4087□ctg6337□□WAG-102I11  
ctg4088□□□WAG-1F16  
ctg4088□ctg1266□□WAG-1M16  
ctg4088□ctg1266□□WAG-48I15  
ctg4088□ctg1266□□WAG-96N18  
ctg4088□ctg1266□□WAG-111G1  
ctg4088□ctg1266□ctg1950□WAG-43G21  
ctg4088□ctg1266□ctg1950□WAG-77O7  
ctg4088□ctg1266□ctg1950□WAG-90N6  
ctg4088□ctg1266□ctg1950□WAG-95G3  
ctg4088□ctg1266□ctg3044□WAG-11E11  
ctg4088□ctg1266□ctg3044□WAG-28K16  
ctg4088□ctg1266□ctg3044□WAG-109I13  
ctg4088□ctg312□□WAG-7F18  
ctg4088□ctg312□□WAG-28M15  
ctg4088□ctg312□□WAG-61H24  
ctg4088□ctg312□□WAG-69M9  
ctg4088□ctg312□ctg410□WAG-31K10  
ctg4088□ctg312□ctg410□WAG-36E16  
ctg4088□ctg312□ctg410□WAG-41O24  
ctg4088□ctg312□ctg410□WAG-53N11  
ctg4088□ctg312□ctg410□WAG-55K13  
ctg4088□ctg312□ctg410□WAG-60M5  
ctg4088□ctg312□ctg410□WAG-87J4  
ctg4088□ctg312□ctg410□WAG-91N8  
ctg4088□ctg312□ctg410□WAG-94M19  
ctg4088□ctg312□ctg410□WAG-102B7  
ctg4088□ctg312□ctg410□WAG-120H14

ctg4088□ctg312□ctg410□WAG-128N24  
ctg4089□□□WAG-80L21  
ctg4089□□□WAG-87C15  
ctg4089□ctg283□□WAG-120K9  
ctg4089□ctg283□ctg498□WAG-9I8  
ctg4089□ctg283□ctg498□WAG-24B5  
ctg4089□ctg283□ctg498□WAG-40J1  
ctg4089□ctg283□ctg498□WAG-55A2  
ctg4089□ctg283□ctg498□WAG-56J12  
ctg4089□ctg283□ctg498□WAG-69F1  
ctg4089□ctg283□ctg498□WAG-97D15  
ctg4089□ctg283□ctg498□WAG-98K10  
ctg4089□ctg283□ctg498□WAG-123O2  
ctg4089□ctg283□ctg498□WAG-127E16  
ctg4089□ctg4220□□WAG-76G1  
ctg4089□ctg4220□ctg6092□WAG-16A21  
ctg4089□ctg4220□ctg6092□WAG-118B24  
ctg4089□ctg4379□ctg4549□WAG-113F17  
ctg4089□ctg4379□ctg4549□WAG-123P20  
ctg4089□ctg5205□ctg5934□WAG-6M1  
ctg4089□ctg5205□ctg5934□WAG-36D12  
ctg4089□ctg5771□□WAG-54G16  
ctg4089□ctg5771□□WAG-57N21  
ctg409□ctg1268□ctg1120□WAG-19D5  
ctg409□ctg1268□ctg1120□WAG-34D6  
ctg409□ctg1268□ctg1120□WAG-37J18  
ctg409□ctg1268□ctg1120□WAG-94I7  
ctg409□ctg1268□ctg1120□WAG-95J12  
ctg409□ctg961□ctg811□WAG-47O1  
ctg409□ctg961□ctg811□WAG-58M9  
ctg409□ctg961□ctg811□WAG-92J6  
ctg409□ctg961□ctg811□WAG-105M18  
ctg409□ctg961□ctg811□WAG-113G23  
ctg4090□ctg1035□ctg1529□WAG-12B18  
ctg4090□ctg1035□ctg1529□WAG-35H14  
ctg4090□ctg1035□ctg1529□WAG-37J4  
ctg4090□ctg1035□ctg1529□WAG-46A8  
ctg4090□ctg1035□ctg1529□WAG-58A9  
ctg4090□ctg1035□ctg1529□WAG-65A8  
ctg4090□ctg1035□ctg1529□WAG-110B7  
ctg4090□ctg1035□ctg1529□WAG-112F2  
ctg4090□ctg3070□ctg4178□WAG-64J19  
ctg4090□ctg3070□ctg4178□WAG-75O14  
ctg4090□ctg3070□ctg4178□WAG-117B16  
ctg4090□ctg3070□ctg4178□WAG-126P22  
ctg4090□ctg841□ctg687□WAG-9E9  
ctg4090□ctg841□ctg687□WAG-62B3  
ctg4090□ctg841□ctg687□WAG-64D8  
ctg4090□ctg841□ctg687□WAG-116F12  
ctg4090□ctg841□ctg687□WAG-120M11  
ctg4090□ctg864□ctg1118□WAG-27H20  
ctg4090□ctg864□ctg1118□WAG-38B3  
ctg4090□ctg864□ctg1118□WAG-44K19  
ctg4090□ctg864□ctg1118□WAG-48E15  
ctg4090□ctg864□ctg1118□WAG-91F24  
ctg4090□ctg864□ctg1118□WAG-102K5

ctg4090□ctg864□ctg1118□WAG-114P18  
ctg4090□ctg864□ctg1118□WAG-119D8  
ctg4090□ctg864□ctg4175□WAG-2B13  
ctg4090□ctg864□ctg4175□WAG-46I6  
ctg4090□ctg864□ctg4175□WAG-81I7  
ctg4090□ctg864□ctg4536□WAG-105E5  
ctg4090□ctg864□ctg4536□WAG-119M5  
ctg4091□□□WAG-4M18  
ctg4091□□□WAG-7L10  
ctg4091□ctg2767□ctg2744□WAG-3E17  
ctg4091□ctg2767□ctg2744□WAG-32H4  
ctg4091□ctg2767□ctg2744□WAG-62N2  
ctg4091□ctg2767□ctg2744□WAG-98I16  
ctg4091□ctg3758□□WAG-111B22  
ctg4091□ctg3758□ctg3993□WAG-3G16  
ctg4091□ctg3758□ctg3993□WAG-6G7  
ctg4091□ctg3758□ctg3993□WAG-42H22  
ctg4091□ctg4381□ctg4551□WAG-60K11  
ctg4091□ctg4381□ctg4551□WAG-117J23  
ctg4092□□□WAG-83D18  
ctg4092□□□WAG-121J12  
ctg4092□ctg6140□□WAG-69I4  
ctg4092□ctg6140□□WAG-77B21  
ctg4092□ctg623□□WAG-31P5  
ctg4092□ctg623□□WAG-34I12  
ctg4092□ctg623□□WAG-39M15  
ctg4092□ctg623□□WAG-57N5  
ctg4092□ctg623□□WAG-78B16  
ctg4092□ctg623□□WAG-90I11  
ctg4092□ctg623□ctg2688□WAG-52P5  
ctg4092□ctg623□ctg2688□WAG-68F10  
ctg4092□ctg623□ctg2688□WAG-106E21  
ctg4092□ctg623□ctg2688□WAG-110F9  
ctg4092□ctg623□ctg2688□WAG-130I14  
ctg4092□ctg623□ctg651□WAG-21K12  
ctg4092□ctg623□ctg651□WAG-40J19  
ctg4092□ctg623□ctg651□WAG-65P18  
ctg4092□ctg623□ctg651□WAG-67N4  
ctg4092□ctg623□ctg651□WAG-71G11  
ctg4092□ctg623□ctg651□WAG-73C24  
ctg4092□ctg623□ctg651□WAG-83C16  
ctg4092□ctg623□ctg651□WAG-93G15  
ctg4092□ctg623□ctg651□WAG-102A17  
ctg4092□ctg623□ctg651□WAG-115E18  
ctg4092□ctg623□ctg651□WAG-119A11  
ctg4092□ctg623□ctg651□WAG-123J11  
ctg4092□ctg623□ctg651□WAG-129J9  
ctg4093□□□WAG-10H19  
ctg4093□□□WAG-11H15  
ctg4093□□□WAG-15M24  
ctg4093□□□WAG-17O1  
ctg4093□□□WAG-42D17  
ctg4093□□□WAG-43B2  
ctg4093□ctg2258□□WAG-104P4  
ctg4093□ctg2258□ctg2350□WAG-33K20  
ctg4093□ctg2258□ctg2350□WAG-77D6

ctg4093□ctg2258□ctg2350□WAG-101N18  
ctg4093□ctg2258□ctg3004□WAG-16F15  
ctg4093□ctg2258□ctg3004□WAG-52D6  
ctg4093□ctg2258□ctg5679□WAG-34H11  
ctg4093□ctg2258□ctg5679□WAG-85C5  
ctg4093□ctg4617□□WAG-63P6  
ctg4093□ctg4617□□WAG-69B3  
ctg4093□ctg4617□□WAG-74J2  
ctg4093□ctg4617□□WAG-99O13  
ctg4093□ctg8□□WAG-29A7  
ctg4093□ctg8□□WAG-93A21  
ctg4093□ctg8□ctg10□WAG-3L16  
ctg4093□ctg8□ctg10□WAG-10G15  
ctg4093□ctg8□ctg10□WAG-24F18  
ctg4093□ctg8□ctg10□WAG-27N5  
ctg4093□ctg8□ctg10□WAG-37J16  
ctg4093□ctg8□ctg10□WAG-44K17  
ctg4093□ctg8□ctg10□WAG-68O10  
ctg4093□ctg8□ctg10□WAG-74J12  
ctg4093□ctg8□ctg10□WAG-79A22  
ctg4093□ctg8□ctg10□WAG-83N9  
ctg4093□ctg8□ctg10□WAG-96B6  
ctg4093□ctg8□ctg10□WAG-120N7  
ctg4093□ctg8□ctg10□WAG-123P22  
ctg4093□ctg8□ctg3531□WAG-19N22  
ctg4093□ctg8□ctg3531□WAG-26A15  
ctg4093□ctg8□ctg3531□WAG-115N6  
ctg4093□ctg8□ctg3531□WAG-126N9  
ctg4093□ctg8□ctg5491□WAG-109C1  
ctg4093□ctg8□ctg5491□WAG-120D7  
ctg4094□□□WAG-109G6  
ctg4094□ctg121□□WAG-12F12  
ctg4094□ctg121□□WAG-97B20  
ctg4094□ctg121□ctg122□WAG-20P10  
ctg4094□ctg121□ctg122□WAG-22I9  
ctg4094□ctg121□ctg122□WAG-25C1  
ctg4094□ctg121□ctg122□WAG-30L8  
ctg4094□ctg121□ctg122□WAG-36L17  
ctg4094□ctg121□ctg122□WAG-42L6  
ctg4094□ctg121□ctg122□WAG-79P21  
ctg4094□ctg121□ctg122□WAG-98C22  
ctg4094□ctg121□ctg122□WAG-98H5  
ctg4094□ctg121□ctg122□WAG-104G5  
ctg4094□ctg121□ctg122□WAG-108E8  
ctg4094□ctg121□ctg122□WAG-112O17  
ctg4094□ctg121□ctg122□WAG-114E14  
ctg4094□ctg121□ctg122□WAG-129K22  
ctg4094□ctg5106□ctg5703□WAG-22G9  
ctg4094□ctg5106□ctg5703□WAG-121M10  
ctg4094□ctg5914□□WAG-50K17  
ctg4094□ctg5914□□WAG-69A18  
ctg4095□□□WAG-13H2  
ctg4095□□□WAG-23C4  
ctg4095□□□WAG-80H23  
ctg4095□□□WAG-115G2  
ctg4095□ctg2661□ctg2629□WAG-8J18

ctg4095□ctg2661□ctg2629□WAG-53D5  
ctg4095□ctg2661□ctg2629□WAG-77D12  
ctg4095□ctg2661□ctg2629□WAG-121H17  
ctg4095□ctg4873□ctg5168□WAG-44E12  
ctg4095□ctg4873□ctg5168□WAG-107K19  
ctg4095□ctg600□□WAG-20A4  
ctg4095□ctg600□□WAG-27H13  
ctg4095□ctg600□□WAG-34J13  
ctg4095□ctg600□ctg1069□WAG-8B14  
ctg4095□ctg600□ctg1069□WAG-17G14  
ctg4095□ctg600□ctg1069□WAG-25F10  
ctg4095□ctg600□ctg1069□WAG-28E11  
ctg4095□ctg600□ctg1069□WAG-39F4  
ctg4095□ctg600□ctg1069□WAG-40H1  
ctg4095□ctg600□ctg1069□WAG-44E24  
ctg4095□ctg600□ctg1069□WAG-45N13  
ctg4095□ctg600□ctg1069□WAG-51L7  
ctg4095□ctg600□ctg1069□WAG-51M22  
ctg4095□ctg600□ctg1069□WAG-82C7  
ctg4095□ctg600□ctg1069□WAG-96A15  
ctg4095□ctg600□ctg1069□WAG-119B14  
ctg4095□ctg600□ctg1069□WAG-129M20  
ctg4095□ctg600□ctg1138□WAG-17F13  
ctg4095□ctg600□ctg1138□WAG-30D17  
ctg4095□ctg600□ctg1138□WAG-63G7  
ctg4095□ctg600□ctg1138□WAG-76C5  
ctg4095□ctg600□ctg1138□WAG-111K17  
ctg4095□ctg600□ctg1138□WAG-117B10  
ctg4095□ctg600□ctg3358□WAG-11L17  
ctg4095□ctg600□ctg3358□WAG-85F10  
ctg4095□ctg600□ctg3358□WAG-93I19  
ctg4095□ctg600□ctg3358□WAG-93M24  
ctg4095□ctg600□ctg5183□WAG-96G2  
ctg4095□ctg600□ctg5183□WAG-127G3  
ctg4096□□□WAG-64A24  
ctg4096□ctg3084□□WAG-40G24  
ctg4096□ctg3084□□WAG-77C5  
ctg4096□ctg3084□□WAG-91C22  
ctg4096□ctg3084□ctg4009□WAG-46O15  
ctg4096□ctg3084□ctg4009□WAG-87B18  
ctg4096□ctg3178□□WAG-64B24  
ctg4096□ctg3178□□WAG-96G24  
ctg4096□ctg3178□ctg4208□WAG-2D6  
ctg4096□ctg3178□ctg4208□WAG-56E19  
ctg4096□ctg3178□ctg4208□WAG-109N10  
ctg4096□ctg5845□□WAG-32N10  
ctg4096□ctg5845□□WAG-113M23  
ctg4096□ctg6554□□WAG-3C13  
ctg4096□ctg6554□□WAG-102F11  
ctg4097□ctg299□ctg385□WAG-1H11  
ctg4097□ctg299□ctg385□WAG-10M2  
ctg4097□ctg299□ctg385□WAG-28J10  
ctg4097□ctg299□ctg385□WAG-42C9  
ctg4097□ctg299□ctg385□WAG-46H20  
ctg4097□ctg299□ctg385□WAG-67F20  
ctg4097□ctg299□ctg385□WAG-79H20



ctg4097□ctg299□ctg385□WAG-90C2  
ctg4097□ctg299□ctg385□WAG-104D19  
ctg4097□ctg299□ctg385□WAG-106A15  
ctg4097□ctg299□ctg385□WAG-108F6  
ctg4097□ctg299□ctg385□WAG-110J1  
ctg4097□ctg299□ctg385□WAG-128P8  
ctg4097□ctg299□ctg6402□WAG-4G5  
ctg4097□ctg299□ctg6402□WAG-72A1  
ctg4097□ctg4981□ctg5413□WAG-46O2  
ctg4097□ctg4981□ctg5413□WAG-64B10  
ctg4097□ctg5776□□WAG-44B9  
ctg4097□ctg5776□□WAG-119M2  
ctg4098□□□WAG-12O12  
ctg4098□ctg4576□□WAG-41H16  
ctg4098□ctg4576□□WAG-75L4  
ctg4098□ctg4576□□WAG-111C5  
ctg4098□ctg4624□ctg4788□WAG-102G3  
ctg4098□ctg4624□ctg4788□WAG-119K13  
ctg4098□ctg6166□□WAG-44O15  
ctg4098□ctg6166□□WAG-64G2  
ctg4098□ctg973□□WAG-14F3  
ctg4098□ctg973□□WAG-82L4  
ctg4098□ctg973□□WAG-93A3  
ctg4098□ctg973□□WAG-129D20  
ctg4098□ctg973□ctg1360□WAG-14N5  
ctg4098□ctg973□ctg1360□WAG-36G13  
ctg4098□ctg973□ctg1360□WAG-63F4  
ctg4098□ctg973□ctg1360□WAG-111P10  
ctg4099□□□WAG-107K17  
ctg4099□ctg2721□ctg2705□WAG-32I7  
ctg4099□ctg2721□ctg2705□WAG-63G1  
ctg4099□ctg2721□ctg2705□WAG-76J24  
ctg4099□ctg3037□□WAG-5A16  
ctg4099□ctg3037□□WAG-111E2  
ctg4099□ctg3037□□WAG-120D10  
ctg4099□ctg3037□ctg5186□WAG-88K20  
ctg4099□ctg3037□ctg5186□WAG-95P15  
ctg4099□ctg3037□ctg6301□WAG-104L4  
ctg4099□ctg3037□ctg6301□WAG-117F19  
ctg41□□□WAG-3O20  
ctg41□□□WAG-129J11  
ctg41□ctg174□ctg143□WAG-13G13  
ctg41□ctg174□ctg143□WAG-50C2  
ctg41□ctg174□ctg143□WAG-67H20  
ctg41□ctg174□ctg143□WAG-75M20  
ctg41□ctg174□ctg143□WAG-75N20  
ctg41□ctg174□ctg143□WAG-82D4  
ctg41□ctg174□ctg143□WAG-88G9  
ctg41□ctg174□ctg143□WAG-96L12  
ctg41□ctg174□ctg143□WAG-96N14  
ctg41□ctg174□ctg143□WAG-100J16  
ctg41□ctg174□ctg143□WAG-115B4  
ctg41□ctg174□ctg143□WAG-127O24  
ctg41□ctg5371□ctg6321□WAG-73F12  
ctg41□ctg5371□ctg6321□WAG-117K20  
ctg41□ctg685□□WAG-1F8

ctg41□ctg685□□WAG-3K19  
ctg41□ctg685□□WAG-23P13  
ctg41□ctg685□ctg3740□WAG-11L21  
ctg41□ctg685□ctg3740□WAG-32P20  
ctg41□ctg685□ctg3740□WAG-64G12  
ctg41□ctg685□ctg701□WAG-5I3  
ctg41□ctg685□ctg701□WAG-7G17  
ctg41□ctg685□ctg701□WAG-18C21  
ctg41□ctg685□ctg701□WAG-61L2  
ctg41□ctg685□ctg701□WAG-92M22  
ctg41□ctg685□ctg701□WAG-102M10  
ctg41□ctg685□ctg701□WAG-122G5  
ctg410□□□WAG-12L18  
ctg410□□□WAG-53O18  
ctg410□ctg1383□□WAG-30B12  
ctg410□ctg1383□ctg1610□WAG-15K22  
ctg410□ctg1383□ctg1610□WAG-19B3  
ctg410□ctg1383□ctg1610□WAG-50N13  
ctg410□ctg1383□ctg1610□WAG-91G6  
ctg410□ctg1383□ctg3448□WAG-77O11  
ctg410□ctg1383□ctg3448□WAG-91P10  
ctg410□ctg5509□ctg6619□WAG-99D21  
ctg410□ctg5509□ctg6619□WAG-122I20  
ctg4100□ctg1515□ctg1798□WAG-15C14  
ctg4100□ctg1515□ctg1798□WAG-25H23  
ctg4100□ctg1515□ctg1798□WAG-53O5  
ctg4100□ctg1515□ctg1798□WAG-55H16  
ctg4100□ctg1515□ctg1798□WAG-59M8  
ctg4100□ctg1515□ctg1798□WAG-65M22  
ctg4100□ctg1515□ctg1798□WAG-68K6  
ctg4100□ctg1515□ctg1798□WAG-85J20  
ctg4100□ctg2009□ctg2526□WAG-69F14  
ctg4100□ctg2009□ctg2526□WAG-106K5  
ctg4100□ctg2009□ctg2526□WAG-113L21  
ctg4100□ctg2009□ctg2526□WAG-113M21  
ctg4100□ctg2917□□WAG-26C10  
ctg4100□ctg2917□□WAG-40F1  
ctg4100□ctg2917□ctg4583□WAG-88P4  
ctg4100□ctg2917□ctg4583□WAG-125C16  
ctg4100□ctg3256□ctg3301□WAG-8F22  
ctg4100□ctg3256□ctg3301□WAG-76F18  
ctg4100□ctg3256□ctg3301□WAG-86L22  
ctg4100□ctg5800□□WAG-11G15  
ctg4100□ctg5800□□WAG-101D24  
ctg4101□□□WAG-83B8  
ctg4101□ctg974□□WAG-87D6  
ctg4101□ctg974□ctg1112□WAG-19O15  
ctg4101□ctg974□ctg1112□WAG-20B7  
ctg4101□ctg974□ctg1112□WAG-34G9  
ctg4101□ctg974□ctg1112□WAG-41D21  
ctg4101□ctg974□ctg1112□WAG-41D22  
ctg4101□ctg974□ctg1112□WAG-49A6  
ctg4101□ctg974□ctg1112□WAG-52O14  
ctg4101□ctg974□ctg1112□WAG-76L17  
ctg4101□ctg974□ctg1112□WAG-78L9  
ctg4101□ctg974□ctg1112□WAG-84I5

ctg4101□ctg974□ctg1112□WAG-101B11  
ctg4101□ctg974□ctg1112□WAG-102C14  
ctg4101□ctg974□ctg1112□WAG-105A23  
ctg4101□ctg974□ctg1112□WAG-109N6  
ctg4101□ctg974□ctg1112□WAG-121D22  
ctg4101□ctg974□ctg1112□WAG-126L18  
ctg4101□ctg974□ctg4806□WAG-I19  
ctg4101□ctg974□ctg4806□WAG-O19  
ctg4102□□□WAG-30H15  
ctg4102□ctg1520□ctg1363□WAG-26L5  
ctg4102□ctg1520□ctg1363□WAG-57F6  
ctg4102□ctg1520□ctg1363□WAG-66I7  
ctg4102□ctg1520□ctg1363□WAG-68P3  
ctg4102□ctg1520□ctg1363□WAG-117B6  
ctg4102□ctg166□ctg131□WAG-12I3  
ctg4102□ctg166□ctg131□WAG-30E5  
ctg4102□ctg166□ctg131□WAG-58L7  
ctg4102□ctg166□ctg131□WAG-70H7  
ctg4102□ctg166□ctg131□WAG-71I13  
ctg4102□ctg166□ctg131□WAG-100I16  
ctg4102□ctg166□ctg131□WAG-101I23  
ctg4102□ctg166□ctg131□WAG-122H14  
ctg4102□ctg166□ctg131□WAG-126D17  
ctg4102□ctg837□□WAG-17D9  
ctg4102□ctg837□ctg1136□WAG-23H15  
ctg4102□ctg837□ctg1136□WAG-58C20  
ctg4102□ctg837□ctg1136□WAG-89F3  
ctg4102□ctg837□ctg1136□WAG-91L17  
ctg4102□ctg837□ctg1136□WAG-101B16  
ctg4102□ctg837□ctg1136□WAG-110K9  
ctg4102□ctg837□ctg1136□WAG-117C10  
ctg4102□ctg837□ctg1136□WAG-125I1  
ctg4102□ctg837□ctg3143□WAG-30P16  
ctg4102□ctg837□ctg3143□WAG-75B10  
ctg4102□ctg837□ctg3143□WAG-90B2  
ctg4102□ctg837□ctg6278□WAG-53H20  
ctg4102□ctg837□ctg6278□WAG-124E20  
ctg4103□□□WAG-1L15  
ctg4103□□□WAG-21G17  
ctg4103□□□WAG-29L2  
ctg4103□□□WAG-91A3  
ctg4103□ctg954□□WAG-2P18  
ctg4103□ctg954□□WAG-14F2  
ctg4103□ctg954□□WAG-74G4  
ctg4103□ctg954□ctg1025□WAG-18M2  
ctg4103□ctg954□ctg1025□WAG-52H4  
ctg4103□ctg954□ctg1025□WAG-68C12  
ctg4103□ctg954□ctg1025□WAG-92N22  
ctg4103□ctg954□ctg1025□WAG-95E2  
ctg4103□ctg954□ctg1025□WAG-120A4  
ctg4103□ctg954□ctg1025□WAG-127F22  
ctg4103□ctg954□ctg1088□WAG-3J24  
ctg4103□ctg954□ctg1088□WAG-19F6  
ctg4103□ctg954□ctg1088□WAG-58J14  
ctg4103□ctg954□ctg1088□WAG-59D13  
ctg4103□ctg954□ctg1088□WAG-69F12

ctg4103□ctg954□ctg1088□WAG-70G12  
ctg4103□ctg954□ctg1088□WAG-114M12  
ctg4104□□□WAG-68N23  
ctg4104□□□WAG-106J24  
ctg4104□ctg2171□ctg2045□WAG-111I6  
ctg4104□ctg2171□ctg2045□WAG-211I4  
ctg4104□ctg2171□ctg2045□WAG-90H2  
ctg4104□ctg2171□ctg2045□WAG-108D18  
ctg4104□ctg2171□ctg2045□WAG-110L23  
ctg4105□□□WAG-48H2  
ctg4105□□□WAG-68A15  
ctg4105□□□WAG-105A12  
ctg4105□□□WAG-116L14  
ctg4105□ctg1193□ctg1037□WAG-36A19  
ctg4105□ctg1193□ctg1037□WAG-36B14  
ctg4105□ctg1193□ctg1037□WAG-54J6  
ctg4105□ctg1193□ctg1037□WAG-59D17  
ctg4105□ctg1193□ctg1037□WAG-64P3  
ctg4105□ctg1193□ctg1037□WAG-67O16  
ctg4105□ctg1193□ctg1037□WAG-75N3  
ctg4105□ctg1193□ctg1037□WAG-76K18  
ctg4105□ctg1193□ctg1037□WAG-82H21  
ctg4105□ctg1193□ctg1037□WAG-116H7  
ctg4105□ctg218□□WAG-7N22  
ctg4105□ctg218□□WAG-8B13  
ctg4105□ctg218□□WAG-22M20  
ctg4105□ctg218□□WAG-34D23  
ctg4105□ctg218□□WAG-35P23  
ctg4105□ctg218□□WAG-79B8  
ctg4105□ctg218□ctg2425□WAG-20B15  
ctg4105□ctg218□ctg2425□WAG-33P13  
ctg4105□ctg218□ctg2425□WAG-63P12  
ctg4105□ctg218□ctg2425□WAG-68H13  
ctg4105□ctg218□ctg2425□WAG-74N4  
ctg4105□ctg218□ctg2425□WAG-89K7  
ctg4105□ctg218□ctg2425□WAG-89O10  
ctg4105□ctg218□ctg2425□WAG-126O13  
ctg4105□ctg218□ctg2484□WAG-63P2  
ctg4105□ctg218□ctg2484□WAG-121E9  
ctg4105□ctg218□ctg2484□WAG-129O15  
ctg4105□ctg218□ctg2569□WAG-48I19  
ctg4105□ctg218□ctg2569□WAG-54A3  
ctg4105□ctg218□ctg2569□WAG-91F1  
ctg4105□ctg218□ctg283□WAG-48C13  
ctg4105□ctg218□ctg283□WAG-48E23  
ctg4105□ctg218□ctg283□WAG-50G7  
ctg4105□ctg218□ctg283□WAG-66G21  
ctg4105□ctg218□ctg283□WAG-82K17  
ctg4105□ctg218□ctg283□WAG-87F22  
ctg4105□ctg218□ctg283□WAG-100O16  
ctg4105□ctg218□ctg283□WAG-102P12  
ctg4105□ctg218□ctg283□WAG-121I10  
ctg4105□ctg218□ctg283□WAG-127N18  
ctg4105□ctg218□ctg283□WAG-129E7  
ctg4105□ctg3375□□WAG-120K17  
ctg4105□ctg3375□ctg4439□WAG-20H12

ctg4105□ctg3375□ctg4439□WAG-21G4  
ctg4105□ctg4855□ctg5137□WAG-17E8  
ctg4105□ctg4855□ctg5137□WAG-57B21  
ctg4105□ctg5677□□WAG-56L14  
ctg4105□ctg5677□□WAG-126E19  
ctg4105□ctg6247□□WAG-37L21  
ctg4105□ctg6247□□WAG-59A18  
ctg4106□□□WAG-41L1  
ctg4106□□□WAG-52C22  
ctg4106□□□WAG-53G21  
ctg4106□□□WAG-116I21  
ctg4106□□□WAG-117A2  
ctg4106□ctg12□□WAG-29H19  
ctg4106□ctg12□□WAG-52J7  
ctg4106□ctg12□□WAG-57E2  
ctg4106□ctg12□□WAG-71N21  
ctg4106□ctg12□□WAG-113N3  
ctg4106□ctg12□ctg1140□WAG-10M4  
ctg4106□ctg12□ctg1140□WAG-15P19  
ctg4106□ctg12□ctg1140□WAG-17B23  
ctg4106□ctg12□ctg1140□WAG-33I13  
ctg4106□ctg12□ctg1140□WAG-38C19  
ctg4106□ctg12□ctg1140□WAG-42O15  
ctg4106□ctg12□ctg1140□WAG-43O14  
ctg4106□ctg12□ctg1140□WAG-83J11  
ctg4106□ctg12□ctg1140□WAG-88I12  
ctg4106□ctg12□ctg1140□WAG-110K6  
ctg4106□ctg12□ctg1140□WAG-122I1  
ctg4106□ctg12□ctg1140□WAG-123G18  
ctg4106□ctg12□ctg1348□WAG-48B17  
ctg4106□ctg12□ctg1348□WAG-52G3  
ctg4106□ctg12□ctg1348□WAG-54F23  
ctg4106□ctg12□ctg1348□WAG-67I2  
ctg4106□ctg12□ctg1348□WAG-81J2  
ctg4106□ctg12□ctg1348□WAG-109D5  
ctg4106□ctg12□ctg1348□WAG-115L3  
ctg4106□ctg12□ctg2289□WAG-C14  
ctg4106□ctg12□ctg2289□WAG-3F9  
ctg4106□ctg12□ctg2289□WAG-28D14  
ctg4106□ctg875□□WAG-82H7  
ctg4106□ctg875□ctg6709□WAG-7C3  
ctg4106□ctg875□ctg6709□WAG-41O18  
ctg4106□ctg875□ctg941□WAG-6J24  
ctg4106□ctg875□ctg941□WAG-35H8  
ctg4106□ctg875□ctg941□WAG-49I19  
ctg4106□ctg875□ctg941□WAG-53P21  
ctg4106□ctg875□ctg941□WAG-55L21  
ctg4106□ctg875□ctg941□WAG-118F5  
ctg4107□□□WAG-8G16  
ctg4107□□□WAG-39M12  
ctg4107□□□WAG-62D1  
ctg4107□□□WAG-99B13  
ctg4107□□□WAG-119L4  
ctg4107□ctg1231□□WAG-54H3  
ctg4107□ctg1231□□WAG-70B1  
ctg4107□ctg1231□□WAG-103P18

ctg4107□ctg1231□ctg2127□WAG-15O23  
ctg4107□ctg1231□ctg2127□WAG-42J16  
ctg4107□ctg1231□ctg2127□WAG-56E9  
ctg4107□ctg1231□ctg2127□WAG-58B12  
ctg4107□ctg1231□ctg2127□WAG-99A14  
ctg4107□ctg1231□ctg2127□WAG-106L7  
ctg4107□ctg1231□ctg2127□WAG-108M2  
ctg4107□ctg1231□ctg2127□WAG-113A7  
ctg4107□ctg1651□□WAG-121I23  
ctg4107□ctg1651□ctg2131□WAG-25O5  
ctg4107□ctg1651□ctg2131□WAG-31I8  
ctg4107□ctg1651□ctg2131□WAG-34L1  
ctg4107□ctg1651□ctg2131□WAG-70N19  
ctg4107□ctg1651□ctg2131□WAG-73N5  
ctg4107□ctg1651□ctg2131□WAG-98H12  
ctg4107□ctg1651□ctg2131□WAG-106K11  
ctg4107□ctg3796□□WAG-66K4  
ctg4107□ctg3796□ctg5033□WAG-17G24  
ctg4107□ctg3796□ctg5033□WAG-83G2  
ctg4108□ctg2003□ctg2409□WAG-86G2  
ctg4108□ctg2003□ctg2409□WAG-103M3  
ctg4108□ctg2003□ctg2409□WAG-124M6  
ctg4108□ctg2003□ctg2409□WAG-128L17  
ctg4108□ctg2003□ctg6548□WAG-72K23  
ctg4108□ctg2003□ctg6548□WAG-86J7  
ctg4108□ctg81□ctg103□WAG-17N10  
ctg4108□ctg81□ctg103□WAG-22K20  
ctg4108□ctg81□ctg103□WAG-33O13  
ctg4108□ctg81□ctg103□WAG-36E24  
ctg4108□ctg81□ctg103□WAG-60E1  
ctg4108□ctg81□ctg103□WAG-60N14  
ctg4108□ctg81□ctg103□WAG-63L19  
ctg4108□ctg81□ctg103□WAG-73E22  
ctg4108□ctg81□ctg103□WAG-84I7  
ctg4108□ctg81□ctg103□WAG-84K11  
ctg4108□ctg81□ctg103□WAG-112E3  
ctg4109□□□WAG-14I1  
ctg4109□□□WAG-19A19  
ctg4109□ctg1617□□WAG-82J12  
ctg4109□ctg1617□□WAG-82K11  
ctg4109□ctg1617□□WAG-97D18  
ctg4109□ctg1617□ctg2026□WAG-40O18  
ctg4109□ctg1617□ctg2026□WAG-59B5  
ctg4109□ctg1617□ctg2026□WAG-62H3  
ctg4109□ctg1617□ctg2026□WAG-81O4  
ctg4109□ctg1617□ctg2026□WAG-109O18  
ctg4109□ctg1617□ctg4964□WAG-67A16  
ctg4109□ctg1617□ctg4964□WAG-91D11  
ctg4109□ctg4595□□WAG-64J3  
ctg4109□ctg4595□□WAG-66C1  
ctg4109□ctg4595□□WAG-70E3  
ctg4109□ctg4595□□WAG-127K1  
ctg4109□ctg5717□□WAG-31J10  
ctg4109□ctg5717□□WAG-129G23  
ctg4109□ctg6342□□WAG-34G21  
ctg4109□ctg6342□□WAG-84B17

ctg4109□ctg677□□WAG-2B21  
ctg4109□ctg677□□WAG-49I5  
ctg4109□ctg677□ctg548□WAG-20O2  
ctg4109□ctg677□ctg548□WAG-33D9  
ctg4109□ctg677□ctg548□WAG-82M19  
ctg4109□ctg677□ctg548□WAG-88P8  
ctg4109□ctg677□ctg548□WAG-95F22  
ctg4109□ctg677□ctg548□WAG-109B21  
ctg4109□ctg677□ctg548□WAG-112I3  
ctg4109□ctg677□ctg548□WAG-120K1  
ctg4109□ctg677□ctg548□WAG-124K19  
ctg411□ctg1342□ctg1187□WAG-2G18  
ctg411□ctg1342□ctg1187□WAG-8E11  
ctg411□ctg1342□ctg1187□WAG-24P8  
ctg411□ctg1342□ctg1187□WAG-40C5  
ctg411□ctg1342□ctg4675□WAG-96I8  
ctg411□ctg1342□ctg4675□WAG-122B3  
ctg4110□□□WAG-1M24  
ctg4110□□□WAG-12L7  
ctg4110□□□WAG-75B8  
ctg4110□□□WAG-104F7  
ctg4110□ctg3719□ctg3939□WAG-9H17  
ctg4110□ctg3719□ctg3939□WAG-19I7  
ctg4110□ctg3719□ctg3939□WAG-77H3  
ctg4110□ctg5705□□WAG-26B15  
ctg4110□ctg5705□□WAG-118E19  
ctg4110□ctg671□ctg4257□WAG-96M5  
ctg4110□ctg671□ctg4257□WAG-130P7  
ctg4110□ctg671□ctg715□WAG-21H12  
ctg4110□ctg671□ctg715□WAG-24F10  
ctg4110□ctg671□ctg715□WAG-63K12  
ctg4110□ctg671□ctg715□WAG-73L5  
ctg4110□ctg671□ctg715□WAG-103D6  
ctg4110□ctg671□ctg715□WAG-112P4  
ctg4110□ctg671□ctg715□WAG-130C11  
ctg4110□ctg740□□WAG-127G2  
ctg4110□ctg740□ctg1007□WAG-2O18  
ctg4110□ctg740□ctg1007□WAG-11B13  
ctg4110□ctg740□ctg1007□WAG-16D2  
ctg4110□ctg740□ctg1007□WAG-28B23  
ctg4110□ctg740□ctg1007□WAG-44K3  
ctg4110□ctg740□ctg1007□WAG-49J3  
ctg4110□ctg740□ctg1007□WAG-50L9  
ctg4110□ctg740□ctg1007□WAG-64F16  
ctg4110□ctg740□ctg1007□WAG-87H23  
ctg4111□□□WAG-4L23  
ctg4111□ctg3720□□WAG-35G10  
ctg4111□ctg3720□ctg5021□WAG-20F5  
ctg4111□ctg3720□ctg5021□WAG-51M23  
ctg4111□ctg4669□□WAG-11J14  
ctg4111□ctg4669□□WAG-19M8  
ctg4111□ctg4669□ctg5775□WAG-58J20  
ctg4111□ctg4669□ctg5775□WAG-130J2  
ctg4111□ctg4669□ctg6966□WAG-33I23  
ctg4111□ctg4669□ctg6966□WAG-107C20  
ctg4111□ctg5572□□WAG-81M9

ctg4111□ctg5572□□WAG-105B23  
ctg4112□ctg184□□WAG-44G6  
ctg4112□ctg184□ctg247□WAG-17F16  
ctg4112□ctg184□ctg247□WAG-35E5  
ctg4112□ctg184□ctg247□WAG-49N5  
ctg4112□ctg184□ctg247□WAG-66N1  
ctg4112□ctg184□ctg247□WAG-67C19  
ctg4112□ctg184□ctg247□WAG-71E18  
ctg4112□ctg184□ctg247□WAG-76L24  
ctg4112□ctg184□ctg247□WAG-97J23  
ctg4112□ctg184□ctg247□WAG-110L14  
ctg4112□ctg184□ctg247□WAG-117G17  
ctg4112□ctg184□ctg247□WAG-128I2  
ctg4112□ctg3303□ctg3363□WAG-53N5  
ctg4112□ctg3303□ctg3363□WAG-112O15  
ctg4112□ctg3303□ctg3363□WAG-125A7  
ctg4112□ctg6018□□WAG-104H3  
ctg4112□ctg6018□□WAG-129C14  
ctg4113□□□WAG-5A11  
ctg4113□ctg1409□ctg1258□WAG-54F18  
ctg4113□ctg1409□ctg1258□WAG-74A3  
ctg4113□ctg1409□ctg1258□WAG-77E18  
ctg4113□ctg1409□ctg1258□WAG-79P10  
ctg4113□ctg1409□ctg1258□WAG-88J1  
ctg4113□ctg1923□ctg1846□WAG-47B13  
ctg4113□ctg1923□ctg1846□WAG-62A17  
ctg4113□ctg1923□ctg1846□WAG-82N18  
ctg4113□ctg1923□ctg1846□WAG-126D11  
ctg4113□ctg3553□□WAG-15K10  
ctg4113□ctg3553□□WAG-35H15  
ctg4113□ctg3553□ctg4759□WAG-20D2  
ctg4113□ctg3553□ctg4759□WAG-106M11  
ctg4113□ctg4232□□WAG-101K16  
ctg4113□ctg4232□ctg5992□WAG-32H12  
ctg4113□ctg4232□ctg5992□WAG-63J16  
ctg4113□ctg5407□ctg6410□WAG-60P22  
ctg4113□ctg5407□ctg6410□WAG-62B1  
ctg4113□ctg590□ctg613□WAG-28O14  
ctg4113□ctg590□ctg613□WAG-41D5  
ctg4113□ctg590□ctg613□WAG-57A9  
ctg4113□ctg590□ctg613□WAG-60B19  
ctg4113□ctg590□ctg613□WAG-61C24  
ctg4113□ctg590□ctg613□WAG-65J7  
ctg4113□ctg590□ctg613□WAG-68M4  
ctg4113□ctg590□ctg613□WAG-75D15  
ctg4113□ctg590□ctg613□WAG-88L20  
ctg4113□ctg590□ctg613□WAG-94J17  
ctg4113□ctg590□ctg613□WAG-111O7  
ctg4113□ctg590□ctg613□WAG-127H23  
ctg4113□ctg5911□□WAG-20F9  
ctg4113□ctg5911□□WAG-71E13  
ctg4114□□□WAG-41I23  
ctg4114□□□WAG-79J8  
ctg4114□ctg1844□□WAG-109J3  
ctg4114□ctg1844□ctg1746□WAG-70D13  
ctg4114□ctg1844□ctg1746□WAG-78P15



ctg4114□ctg1844□ctg1746□WAG-82I14  
ctg4114□ctg4114□□WAG-78L10  
ctg4114□ctg4114□□WAG-93I8  
ctg4114□ctg4114□□WAG-110G19  
ctg4114□ctg4114□ctg4388□WAG-32M10  
ctg4114□ctg4114□ctg4388□WAG-69B10  
ctg4114□ctg4114□ctg4388□WAG-94A16  
ctg4114□ctg4628□ctg4795□WAG-47A4  
ctg4114□ctg4628□ctg4795□WAG-53A12  
ctg4114□ctg5151□ctg5818□WAG-32E9  
ctg4114□ctg5151□ctg5818□WAG-118B19  
ctg4115□□□WAG-58J6  
ctg4115□□□WAG-89H6  
ctg4115□□□WAG-111G23  
ctg4115□□□WAG-120E12  
ctg4115□ctg2152□ctg2030□WAG-31M7  
ctg4115□ctg2152□ctg2030□WAG-51I18  
ctg4115□ctg2152□ctg2030□WAG-56D17  
ctg4115□ctg2152□ctg2030□WAG-110E5  
ctg4115□ctg2152□ctg2030□WAG-121B24  
ctg4115□ctg2416□ctg2320□WAG-16J17  
ctg4115□ctg2416□ctg2320□WAG-24F4  
ctg4115□ctg2416□ctg2320□WAG-48M7  
ctg4115□ctg2416□ctg2320□WAG-102M8  
ctg4115□ctg2764□□WAG-61B23  
ctg4115□ctg2764□ctg3700□WAG-45H9  
ctg4115□ctg2764□ctg3700□WAG-61L11  
ctg4115□ctg2764□ctg3700□WAG-107A13  
ctg4115□ctg3101□ctg3100□WAG-71L9  
ctg4115□ctg3101□ctg3100□WAG-93M18  
ctg4115□ctg3101□ctg3100□WAG-115H22  
ctg4115□ctg4634□□WAG-K3  
ctg4115□ctg4634□□WAG-1D19  
ctg4115□ctg4634□□WAG-37C5  
ctg4115□ctg474□□WAG-1L8  
ctg4115□ctg474□□WAG-10N10  
ctg4115□ctg474□□WAG-62M14  
ctg4115□ctg474□□WAG-98L4  
ctg4115□ctg474□ctg3403□WAG-88N11  
ctg4115□ctg474□ctg3403□WAG-101I11  
ctg4115□ctg474□ctg3403□WAG-105K13  
ctg4115□ctg474□ctg499□WAG-15A17  
ctg4115□ctg474□ctg499□WAG-16O11  
ctg4115□ctg474□ctg499□WAG-35L12  
ctg4115□ctg474□ctg499□WAG-50K3  
ctg4115□ctg474□ctg499□WAG-61F4  
ctg4115□ctg474□ctg499□WAG-67P4  
ctg4115□ctg474□ctg499□WAG-80N11  
ctg4115□ctg474□ctg499□WAG-85L4  
ctg4115□ctg474□ctg499□WAG-88G18  
ctg4115□ctg5192□ctg5904□WAG-89E3  
ctg4115□ctg5192□ctg5904□WAG-101I3  
ctg4115□ctg5375□ctg6330□WAG-8J7  
ctg4115□ctg5375□ctg6330□WAG-52M2  
ctg4115□ctg6130□□WAG-17G23  
ctg4115□ctg6130□□WAG-96D11

ctg4115□ctg873□ctg897□WAG-2J3  
ctg4115□ctg873□ctg897□WAG-25P13  
ctg4115□ctg873□ctg897□WAG-31M15  
ctg4115□ctg873□ctg897□WAG-35G13  
ctg4115□ctg873□ctg897□WAG-45L19  
ctg4115□ctg873□ctg897□WAG-122L18  
ctg4116□□□WAG-112N22  
ctg4116□ctg1431□ctg1284□WAG-52B20  
ctg4116□ctg1431□ctg1284□WAG-69N6  
ctg4116□ctg1431□ctg1284□WAG-101L1  
ctg4116□ctg1431□ctg1284□WAG-112M21  
ctg4116□ctg2236□□WAG-26F21  
ctg4116□ctg2236□□WAG-47N11  
ctg4116□ctg2236□ctg3328□WAG-33O6  
ctg4116□ctg2236□ctg3328□WAG-53G9  
ctg4116□ctg2236□ctg3328□WAG-97H7  
ctg4116□ctg2236□ctg3328□WAG-119O16  
ctg4116□ctg362□□WAG-55J19  
ctg4116□ctg362□ctg449□WAG-45P7  
ctg4116□ctg362□ctg449□WAG-50H4  
ctg4116□ctg362□ctg449□WAG-85D11  
ctg4116□ctg362□ctg449□WAG-88L17  
ctg4116□ctg362□ctg449□WAG-90K5  
ctg4116□ctg362□ctg449□WAG-95K7  
ctg4116□ctg362□ctg449□WAG-109M21  
ctg4116□ctg4574□□WAG-33J15  
ctg4116□ctg4574□□WAG-59K17  
ctg4116□ctg4574□□WAG-101G15  
ctg4117□□□WAG-11J5  
ctg4117□□□WAG-55F24  
ctg4117□□□WAG-112H14  
ctg4117□□□WAG-113P1  
ctg4117□ctg287□□WAG-42N18  
ctg4117□ctg287□ctg1821□WAG-22P14  
ctg4117□ctg287□ctg1821□WAG-38H16  
ctg4117□ctg287□ctg1821□WAG-56J18  
ctg4117□ctg287□ctg1821□WAG-104B6  
ctg4117□ctg287□ctg1821□WAG-112H13  
ctg4117□ctg287□ctg1821□WAG-112I14  
ctg4117□ctg287□ctg272□WAG-14B16  
ctg4117□ctg287□ctg272□WAG-24G13  
ctg4117□ctg287□ctg272□WAG-29B14  
ctg4117□ctg287□ctg272□WAG-35C11  
ctg4117□ctg287□ctg272□WAG-43E16  
ctg4117□ctg287□ctg272□WAG-52J18  
ctg4117□ctg287□ctg272□WAG-53L1  
ctg4117□ctg287□ctg272□WAG-63H9  
ctg4117□ctg287□ctg272□WAG-68D8  
ctg4117□ctg287□ctg272□WAG-82P14  
ctg4117□ctg287□ctg272□WAG-88B13  
ctg4117□ctg287□ctg272□WAG-88I8  
ctg4117□ctg287□ctg272□WAG-102M1  
ctg4117□ctg287□ctg272□WAG-103B10  
ctg4117□ctg287□ctg272□WAG-113K19  
ctg4117□ctg287□ctg272□WAG-119P21  
ctg4117□ctg5154□ctg5826□WAG-15B7

ctg4117□ctg5154□ctg5826□WAG-36E15  
ctg4117□ctg5435□ctg6471□WAG-7N8  
ctg4117□ctg5435□ctg6471□WAG-81F18  
ctg4118□ctg2082□□WAG-33J14  
ctg4118□ctg2082□ctg2778□WAG-7P15  
ctg4118□ctg2082□ctg2778□WAG-38H1  
ctg4118□ctg2082□ctg2778□WAG-69J12  
ctg4118□ctg2082□ctg4847□WAG-75K8  
ctg4118□ctg2082□ctg4847□WAG-124J12  
ctg4118□ctg2082□ctg6015□WAG-83H21  
ctg4118□ctg2082□ctg6015□WAG-91E2  
ctg4119□□□WAG-3B11  
ctg4119□□□WAG-4P3  
ctg4119□□□WAG-7J21  
ctg4119□□□WAG-41K7  
ctg4119□□□WAG-65L18  
ctg4119□□□WAG-89P1  
ctg4119□□□WAG-126O2  
ctg4119□□□WAG-127O9  
ctg4119□ctg1807□ctg2882□WAG-20L22  
ctg4119□ctg1807□ctg2882□WAG-42C18  
ctg4119□ctg1807□ctg2882□WAG-50D6  
ctg4119□ctg1807□ctg2882□WAG-71L20  
ctg4119□ctg1807□ctg2882□WAG-120I24  
ctg4119□ctg1807□ctg3775□WAG-18L9  
ctg4119□ctg1807□ctg3775□WAG-96C13  
ctg4119□ctg1807□ctg3775□WAG-127N19  
ctg4119□ctg1807□ctg4798□WAG-109A9  
ctg4119□ctg1807□ctg4798□WAG-123G6  
ctg4119□ctg3318□□WAG-102O14  
ctg4119□ctg3318□ctg4501□WAG-119L20  
ctg4119□ctg3318□ctg4501□WAG-130O7  
ctg4119□ctg369□□WAG-50N17  
ctg4119□ctg369□□WAG-57A17  
ctg4119□ctg369□ctg1604□WAG-66P3  
ctg4119□ctg369□ctg1604□WAG-82J13  
ctg4119□ctg369□ctg1604□WAG-83G15  
ctg4119□ctg369□ctg1604□WAG-112I9  
ctg4119□ctg369□ctg3594□WAG-44A15  
ctg4119□ctg369□ctg3594□WAG-72D2  
ctg4119□ctg369□ctg3594□WAG-127A2  
ctg4119□ctg369□ctg486□WAG-27D21  
ctg4119□ctg369□ctg486□WAG-38E23  
ctg4119□ctg369□ctg486□WAG-41A11  
ctg4119□ctg369□ctg486□WAG-43O20  
ctg4119□ctg369□ctg486□WAG-45B19  
ctg4119□ctg369□ctg486□WAG-110G11  
ctg4119□ctg369□ctg486□WAG-129E1  
ctg4119□ctg369□ctg486□WAG-130D15  
ctg412□□□WAG-92E6  
ctg412□□□WAG-96O3  
ctg412□ctg965□□WAG-39P17  
ctg412□ctg965□ctg1786□WAG-47H24  
ctg412□ctg965□ctg1786□WAG-84H14  
ctg412□ctg965□ctg1786□WAG-107O21  
ctg412□ctg965□ctg1786□WAG-112D19

ctg412□ctg965□ctg1786□WAG-116I18  
ctg412□ctg965□ctg6572□WAG-15I15  
ctg412□ctg965□ctg6572□WAG-47A12  
ctg4120□□□WAG-13A22  
ctg4120□□□WAG-21L20  
ctg4120□□□WAG-59I21  
ctg4120□ctg1381□ctg1223□WAG-19G11  
ctg4120□ctg1381□ctg1223□WAG-30H20  
ctg4120□ctg1381□ctg1223□WAG-40J5  
ctg4120□ctg1381□ctg1223□WAG-79J4  
ctg4120□ctg1381□ctg1223□WAG-114E4  
ctg4120□ctg1381□ctg1223□WAG-126N15  
ctg4120□ctg1429□□WAG-84M11  
ctg4120□ctg1429□□WAG-116I22  
ctg4120□ctg1429□ctg1281□WAG-18E10  
ctg4120□ctg1429□ctg1281□WAG-34J17  
ctg4120□ctg1429□ctg1281□WAG-79F22  
ctg4120□ctg1429□ctg1281□WAG-89F24  
ctg4120□ctg1429□ctg1281□WAG-90I10  
ctg4120□ctg1429□ctg1281□WAG-91G4  
ctg4120□ctg1429□ctg1281□WAG-112P14  
ctg4120□ctg45□□WAG-32D9  
ctg4120□ctg45□□WAG-68A5  
ctg4120□ctg45□□WAG-122B14  
ctg4120□ctg45□ctg126□WAG-M1  
ctg4120□ctg45□ctg126□WAG-33P8  
ctg4120□ctg45□ctg126□WAG-36L23  
ctg4120□ctg45□ctg126□WAG-39M23  
ctg4120□ctg45□ctg126□WAG-49F9  
ctg4120□ctg45□ctg126□WAG-58K22  
ctg4120□ctg45□ctg126□WAG-68A16  
ctg4120□ctg45□ctg126□WAG-68P23  
ctg4120□ctg45□ctg126□WAG-71E8  
ctg4120□ctg45□ctg126□WAG-77O21  
ctg4120□ctg45□ctg126□WAG-92N11  
ctg4120□ctg45□ctg126□WAG-93A15  
ctg4120□ctg45□ctg126□WAG-104M16  
ctg4120□ctg45□ctg126□WAG-110I10  
ctg4120□ctg45□ctg126□WAG-123J10  
ctg4120□ctg45□ctg725□WAG-22I17  
ctg4120□ctg45□ctg725□WAG-24B6  
ctg4120□ctg45□ctg725□WAG-24C3  
ctg4120□ctg45□ctg725□WAG-30I10  
ctg4120□ctg45□ctg725□WAG-65C3  
ctg4120□ctg45□ctg725□WAG-68O7  
ctg4120□ctg45□ctg725□WAG-81C3  
ctg4120□ctg45□ctg725□WAG-84I16  
ctg4120□ctg45□ctg725□WAG-88L12  
ctg4120□ctg45□ctg725□WAG-92G24  
ctg4120□ctg45□ctg725□WAG-99B1  
ctg4120□ctg45□ctg725□WAG-111D11  
ctg4120□ctg45□ctg725□WAG-122K19  
ctg4120□ctg45□ctg725□WAG-129J10  
ctg4120□ctg73□□WAG-7M8  
ctg4120□ctg73□ctg86□WAG-11K9  
ctg4120□ctg73□ctg86□WAG-12A9

ctg4120□ctg73□ctg86□WAG-12O5  
ctg4120□ctg73□ctg86□WAG-14N17  
ctg4120□ctg73□ctg86□WAG-15N7  
ctg4120□ctg73□ctg86□WAG-20D11  
ctg4120□ctg73□ctg86□WAG-24L1  
ctg4120□ctg73□ctg86□WAG-36C18  
ctg4120□ctg73□ctg86□WAG-49C23  
ctg4120□ctg73□ctg86□WAG-50M20  
ctg4120□ctg73□ctg86□WAG-54F24  
ctg4120□ctg73□ctg86□WAG-64F20  
ctg4120□ctg73□ctg86□WAG-77I15  
ctg4120□ctg73□ctg86□WAG-79A23  
ctg4120□ctg73□ctg86□WAG-79A24  
ctg4120□ctg73□ctg86□WAG-81L4  
ctg4120□ctg73□ctg86□WAG-91F5  
ctg4120□ctg73□ctg86□WAG-93F11  
ctg4120□ctg73□ctg86□WAG-94B12  
ctg4120□ctg73□ctg86□WAG-104D6  
ctg4120□ctg73□ctg86□WAG-105N18  
ctg4120□ctg73□ctg86□WAG-111P5  
ctg4120□ctg73□ctg86□WAG-118N3  
ctg4120□ctg73□ctg86□WAG-120H7  
ctg4121□□□WAG-28M16  
ctg4121□□□WAG-98I11  
ctg4121□□□WAG-127K24  
ctg4121□ctg1835□ctg1666□WAG-2M24  
ctg4121□ctg1835□ctg1666□WAG-3C10  
ctg4121□ctg1835□ctg1666□WAG-30C6  
ctg4121□ctg1835□ctg1666□WAG-65F1  
ctg4121□ctg1835□ctg1666□WAG-79G21  
ctg4121□ctg1835□ctg1666□WAG-91G8  
ctg4121□ctg1946□ctg2443□WAG-39O16  
ctg4121□ctg1946□ctg2443□WAG-91M7  
ctg4121□ctg1946□ctg2443□WAG-104I16  
ctg4121□ctg1946□ctg2443□WAG-128B13  
ctg4121□ctg1946□ctg3235□WAG-19J16  
ctg4121□ctg1946□ctg3235□WAG-62H11  
ctg4121□ctg1946□ctg3235□WAG-96J21  
ctg4122□□□WAG-7F19  
ctg4122□ctg1462□ctg1356□WAG-24O10  
ctg4122□ctg1462□ctg1356□WAG-62J9  
ctg4122□ctg1462□ctg1356□WAG-70D9  
ctg4122□ctg1462□ctg1356□WAG-93H13  
ctg4122□ctg1462□ctg1356□WAG-104E5  
ctg4122□ctg1462□ctg1356□WAG-114M24  
ctg4122□ctg1462□ctg1356□WAG-118E2  
ctg4122□ctg2197□ctg2067□WAG-9D23  
ctg4122□ctg2197□ctg2067□WAG-29M21  
ctg4122□ctg2197□ctg2067□WAG-54I14  
ctg4122□ctg2197□ctg2067□WAG-75K2  
ctg4122□ctg2474□□WAG-46O11  
ctg4122□ctg2474□□WAG-123H23  
ctg4122□ctg2474□ctg3204□WAG-88I11  
ctg4122□ctg2474□ctg3204□WAG-94A18  
ctg4122□ctg2474□ctg3204□WAG-106H6  
ctg4122□ctg5747□□WAG-13F11

ctg4122□ctg5747□□WAG-36M3  
ctg4123□ctg4614□□WAG-52P24  
ctg4123□ctg4614□□WAG-86C1  
ctg4123□ctg4614□□WAG-111J18  
ctg4123□ctg465□□WAG-6I24  
ctg4123□ctg465□□WAG-14K23  
ctg4123□ctg465□ctg504□WAG-3J13  
ctg4123□ctg465□ctg504□WAG-6B14  
ctg4123□ctg465□ctg504□WAG-6O14  
ctg4123□ctg465□ctg504□WAG-10M17  
ctg4123□ctg465□ctg504□WAG-15O4  
ctg4123□ctg465□ctg504□WAG-55F15  
ctg4123□ctg465□ctg504□WAG-56N14  
ctg4123□ctg465□ctg504□WAG-66O15  
ctg4123□ctg465□ctg504□WAG-69L18  
ctg4123□ctg465□ctg504□WAG-75I1  
ctg4123□ctg465□ctg504□WAG-83G23  
ctg4123□ctg465□ctg504□WAG-86E16  
ctg4123□ctg465□ctg504□WAG-102B20  
ctg4123□ctg465□ctg504□WAG-121A3  
ctg4124□□□WAG-31D18  
ctg4124□ctg492□□WAG-86F1  
ctg4124□ctg492□□WAG-123G2  
ctg4124□ctg492□ctg716□WAG-21B21  
ctg4124□ctg492□ctg716□WAG-21J7  
ctg4124□ctg492□ctg716□WAG-24H3  
ctg4124□ctg492□ctg716□WAG-55E2  
ctg4124□ctg492□ctg716□WAG-63I18  
ctg4124□ctg492□ctg716□WAG-79D14  
ctg4124□ctg492□ctg716□WAG-98N15  
ctg4124□ctg492□ctg716□WAG-101E8  
ctg4124□ctg492□ctg716□WAG-101K21  
ctg4124□ctg492□ctg716□WAG-115C13  
ctg4124□ctg737□ctg3322□WAG-31D6  
ctg4124□ctg737□ctg3322□WAG-50J24  
ctg4124□ctg737□ctg3322□WAG-54O18  
ctg4124□ctg737□ctg957□WAG-9G19  
ctg4124□ctg737□ctg957□WAG-19H20  
ctg4124□ctg737□ctg957□WAG-57A15  
ctg4124□ctg737□ctg957□WAG-71M7  
ctg4124□ctg737□ctg957□WAG-83L14  
ctg4124□ctg737□ctg957□WAG-84F8  
ctg4125□□□WAG-6P23  
ctg4125□□□WAG-85L8  
ctg4125□ctg1094□ctg936□WAG-13D17  
ctg4125□ctg1094□ctg936□WAG-21C22  
ctg4125□ctg1094□ctg936□WAG-39I24  
ctg4125□ctg1094□ctg936□WAG-43F17  
ctg4125□ctg1094□ctg936□WAG-58L3  
ctg4125□ctg1094□ctg936□WAG-62M21  
ctg4125□ctg1094□ctg936□WAG-122G14  
ctg4125□ctg1094□ctg936□WAG-125F20  
ctg4125□ctg1094□ctg936□WAG-126G3  
ctg4125□ctg208□□WAG-65D21  
ctg4125□ctg208□□WAG-65N6  
ctg4125□ctg208□□WAG-82B14

ctg4125□ctg208□□WAG-83D17  
ctg4125□ctg208□ctg172□WAG-22E12  
ctg4125□ctg208□ctg172□WAG-25N10  
ctg4125□ctg208□ctg172□WAG-29C18  
ctg4125□ctg208□ctg172□WAG-36E12  
ctg4125□ctg208□ctg172□WAG-57F5  
ctg4125□ctg208□ctg172□WAG-58K16  
ctg4125□ctg208□ctg172□WAG-60D10  
ctg4125□ctg208□ctg172□WAG-61P2  
ctg4125□ctg208□ctg172□WAG-68A22  
ctg4125□ctg208□ctg172□WAG-86J21  
ctg4125□ctg208□ctg172□WAG-105G1  
ctg4125□ctg208□ctg172□WAG-120I15  
ctg4125□ctg208□ctg172□WAG-130A4  
ctg4125□ctg603□□WAG-36F19  
ctg4125□ctg603□ctg1796□WAG-110B24  
ctg4125□ctg603□ctg1796□WAG-110N5  
ctg4125□ctg603□ctg1796□WAG-120P5  
ctg4125□ctg603□ctg1796□WAG-130F12  
ctg4125□ctg603□ctg502□WAG-22J8  
ctg4125□ctg603□ctg502□WAG-71A15  
ctg4125□ctg603□ctg502□WAG-80O9  
ctg4125□ctg603□ctg502□WAG-102F9  
ctg4125□ctg603□ctg502□WAG-104O18  
ctg4125□ctg603□ctg502□WAG-118A21  
ctg4125□ctg603□ctg502□WAG-122E6  
ctg4125□ctg603□ctg502□WAG-130P12  
ctg4126□□□WAG-16D8  
ctg4126□□□WAG-101A7  
ctg4126□ctg1135□□WAG-35A12  
ctg4126□ctg1135□ctg1080□WAG-15L21  
ctg4126□ctg1135□ctg1080□WAG-37F3  
ctg4126□ctg1135□ctg1080□WAG-41H7  
ctg4126□ctg1135□ctg1080□WAG-84P12  
ctg4126□ctg1135□ctg1080□WAG-97P21  
ctg4126□ctg1135□ctg1080□WAG-115D9  
ctg4126□ctg27□□WAG-53K17  
ctg4126□ctg27□ctg1015□WAG-24B23  
ctg4126□ctg27□ctg1015□WAG-28D5  
ctg4126□ctg27□ctg1015□WAG-48J20  
ctg4126□ctg27□ctg1015□WAG-73E11  
ctg4126□ctg27□ctg1015□WAG-99A3  
ctg4126□ctg27□ctg1015□WAG-126M7  
ctg4126□ctg27□ctg19□WAG-16E12  
ctg4126□ctg27□ctg19□WAG-22I10  
ctg4126□ctg27□ctg19□WAG-22K1  
ctg4126□ctg27□ctg19□WAG-53B19  
ctg4126□ctg27□ctg19□WAG-53L17  
ctg4126□ctg27□ctg19□WAG-69D9  
ctg4126□ctg27□ctg19□WAG-71L15  
ctg4126□ctg27□ctg19□WAG-73K2  
ctg4126□ctg27□ctg19□WAG-82A21  
ctg4126□ctg27□ctg19□WAG-90K14  
ctg4126□ctg27□ctg19□WAG-108P3  
ctg4126□ctg27□ctg19□WAG-112H16  
ctg4126□ctg27□ctg19□WAG-114A15

ctg4126□ctg27□ctg19□WAG-125L22  
ctg4126□ctg5679□□WAG-31N8  
ctg4126□ctg5679□□WAG-118L15  
ctg4127□□□WAG-2K18  
ctg4127□□□WAG-15A14  
ctg4127□□□WAG-31N19  
ctg4127□□□WAG-74L14  
ctg4127□□□WAG-75C10  
ctg4127□□□WAG-109L12  
ctg4127□ctg1793□□WAG-21O16  
ctg4127□ctg1793□□WAG-44C22  
ctg4127□ctg1793□ctg1621□WAG-67N17  
ctg4127□ctg1793□ctg1621□WAG-82L9  
ctg4127□ctg1793□ctg1621□WAG-103J19  
ctg4127□ctg1793□ctg1621□WAG-104O20  
ctg4127□ctg1793□ctg1621□WAG-107P21  
ctg4127□ctg1793□ctg4916□WAG-67O23  
ctg4127□ctg1793□ctg4916□WAG-121G4  
ctg4127□ctg220□□WAG-104G6  
ctg4127□ctg220□ctg2279□WAG-27D5  
ctg4127□ctg220□ctg2279□WAG-73H15  
ctg4127□ctg220□ctg2279□WAG-74N17  
ctg4127□ctg220□ctg2279□WAG-107P11  
ctg4127□ctg220□ctg2279□WAG-114A24  
ctg4127□ctg220□ctg2279□WAG-122G6  
ctg4127□ctg220□ctg240□WAG-10A20  
ctg4127□ctg220□ctg240□WAG-31K5  
ctg4127□ctg220□ctg240□WAG-52I3  
ctg4127□ctg220□ctg240□WAG-55A6  
ctg4127□ctg220□ctg240□WAG-69G12  
ctg4127□ctg220□ctg240□WAG-73N20  
ctg4127□ctg220□ctg240□WAG-114M7  
ctg4127□ctg220□ctg240□WAG-118G1  
ctg4127□ctg220□ctg240□WAG-130H13  
ctg4127□ctg220□ctg4260□WAG-93K22  
ctg4127□ctg220□ctg4260□WAG-126E16  
ctg4128□□□WAG-21C13  
ctg4128□□□WAG-116J1  
ctg4128□ctg3124□□WAG-75O19  
ctg4128□ctg3124□ctg3701□WAG-1A16  
ctg4128□ctg3124□ctg3701□WAG-10E20  
ctg4128□ctg3124□ctg3701□WAG-104I17  
ctg4128□ctg3124□ctg3701□WAG-111P8  
ctg4129□ctg1694□□WAG-84E12  
ctg4129□ctg1694□□WAG-95C20  
ctg4129□ctg1694□ctg1973□WAG-42H15  
ctg4129□ctg1694□ctg1973□WAG-67J12  
ctg4129□ctg1694□ctg1973□WAG-69E9  
ctg4129□ctg1694□ctg1973□WAG-130A10  
ctg4129□ctg1694□ctg5712□WAG-49I20  
ctg4129□ctg1694□ctg5712□WAG-98N3  
ctg4129□ctg6346□□WAG-61J14  
ctg4129□ctg6346□□WAG-76D6  
ctg413□□□WAG-M3  
ctg413□□□WAG-4J8  
ctg413□□□WAG-26E11



ctg413□□□WAG-84A14  
ctg413□ctg2036□□WAG-77L7  
ctg413□ctg2036□ctg2463□WAG-59H17  
ctg413□ctg2036□ctg2463□WAG-76N12  
ctg413□ctg2036□ctg2463□WAG-117H17  
ctg413□ctg2036□ctg2842□WAG-19E2  
ctg413□ctg2036□ctg2842□WAG-50K21  
ctg413□ctg2036□ctg2842□WAG-54N12  
ctg413□ctg2036□ctg2842□WAG-86E8  
ctg413□ctg968□□WAG-48G15  
ctg413□ctg968□ctg1104□WAG-25E6  
ctg413□ctg968□ctg1104□WAG-30D2  
ctg413□ctg968□ctg1104□WAG-37J24  
ctg413□ctg968□ctg1104□WAG-41K4  
ctg413□ctg968□ctg1104□WAG-60J19  
ctg413□ctg968□ctg1104□WAG-116M10  
ctg413□ctg968□ctg1104□WAG-118M4  
ctg413□ctg968□ctg1104□WAG-119G13  
ctg413□ctg968□ctg1104□WAG-127D18  
ctg413□ctg968□ctg1104□WAG-127L22  
ctg413□ctg968□ctg6391□WAG-17D10  
ctg413□ctg968□ctg6391□WAG-87C3  
ctg4130□ctg1630□ctg1880□WAG-31H8  
ctg4130□ctg1630□ctg1880□WAG-38N8  
ctg4130□ctg1630□ctg1880□WAG-82D9  
ctg4130□ctg1630□ctg1880□WAG-86E24  
ctg4130□ctg1630□ctg1880□WAG-127C6  
ctg4130□ctg1630□ctg3194□WAG-36O8  
ctg4130□ctg1630□ctg3194□WAG-45C21  
ctg4130□ctg1630□ctg3194□WAG-112B3  
ctg4131□ctg5688□□WAG-80B13  
ctg4131□ctg5688□□WAG-93L15  
ctg4132□□□WAG-62A22  
ctg4132□ctg1847□ctg1674□WAG-39P21  
ctg4132□ctg1847□ctg1674□WAG-45H22  
ctg4132□ctg1847□ctg1674□WAG-98P3  
ctg4132□ctg1847□ctg1674□WAG-122H6  
ctg4132□ctg310□□WAG-45P21  
ctg4132□ctg310□□WAG-94N16  
ctg4132□ctg310□□WAG-109B8  
ctg4132□ctg310□ctg237□WAG-13O5  
ctg4132□ctg310□ctg237□WAG-24E19  
ctg4132□ctg310□ctg237□WAG-29K4  
ctg4132□ctg310□ctg237□WAG-48N12  
ctg4132□ctg310□ctg237□WAG-50J23  
ctg4132□ctg310□ctg237□WAG-61E13  
ctg4132□ctg310□ctg237□WAG-76O23  
ctg4132□ctg310□ctg237□WAG-81A23  
ctg4132□ctg310□ctg237□WAG-87D11  
ctg4132□ctg310□ctg237□WAG-100O5  
ctg4132□ctg310□ctg237□WAG-119A19  
ctg4132□ctg310□ctg237□WAG-128F3  
ctg4132□ctg310□ctg6478□WAG-61L6  
ctg4132□ctg310□ctg6478□WAG-72J1  
ctg4132□ctg5537□□WAG-33P2  
ctg4132□ctg5537□□WAG-72I11

ctg4133□□□WAG-6M5  
ctg4133□□□WAG-62N24  
ctg4133□□□WAG-86C2  
ctg4133□ctg113□□WAG-28D19  
ctg4133□ctg113□□WAG-50C13  
ctg4133□ctg113□□WAG-94F9  
ctg4133□ctg113□ctg152□WAG-8P14  
ctg4133□ctg113□ctg152□WAG-11K6  
ctg4133□ctg113□ctg152□WAG-24L12  
ctg4133□ctg113□ctg152□WAG-40E6  
ctg4133□ctg113□ctg152□WAG-66D9  
ctg4133□ctg113□ctg152□WAG-79N5  
ctg4133□ctg113□ctg152□WAG-79O5  
ctg4133□ctg113□ctg152□WAG-82M2  
ctg4133□ctg113□ctg152□WAG-84A12  
ctg4133□ctg113□ctg152□WAG-96H8  
ctg4133□ctg113□ctg152□WAG-97P24  
ctg4133□ctg113□ctg152□WAG-106J11  
ctg4133□ctg113□ctg152□WAG-110G15  
ctg4133□ctg113□ctg152□WAG-114O12  
ctg4133□ctg113□ctg152□WAG-123K2  
ctg4133□ctg113□ctg152□WAG-125P17  
ctg4133□ctg113□ctg152□WAG-126P24  
ctg4133□ctg113□ctg4892□WAG-73B14  
ctg4133□ctg113□ctg4892□WAG-105F1  
ctg4133□ctg2402□ctg2299□WAG-9B12  
ctg4133□ctg2402□ctg2299□WAG-24F2  
ctg4133□ctg2402□ctg2299□WAG-43E13  
ctg4133□ctg2402□ctg2299□WAG-49A2  
ctg4133□ctg2402□ctg2299□WAG-54B22  
ctg4133□ctg2402□ctg2299□WAG-62L21  
ctg4133□ctg2402□ctg2299□WAG-105K7  
ctg4133□ctg2402□ctg2299□WAG-111L11  
ctg4133□ctg4829□□WAG-121M24  
ctg4133□ctg4829□ctg6913□WAG-40M2  
ctg4133□ctg4829□ctg6913□WAG-85K24  
ctg4134□ctg1041□ctg871□WAG-18E6  
ctg4134□ctg1041□ctg871□WAG-24F5  
ctg4134□ctg1041□ctg871□WAG-26P2  
ctg4134□ctg1041□ctg871□WAG-62D17  
ctg4134□ctg1041□ctg871□WAG-101K15  
ctg4134□ctg1041□ctg871□WAG-108J16  
ctg4134□ctg4738□ctg4941□WAG-19I6  
ctg4134□ctg4738□ctg4941□WAG-31C1  
ctg4135□□□WAG-77D2  
ctg4135□ctg4565□ctg4713□WAG-56H12  
ctg4135□ctg4565□ctg4713□WAG-77L12  
ctg4135□ctg521□□WAG-4P8  
ctg4135□ctg521□□WAG-31O5  
ctg4135□ctg521□ctg555□WAG-19H23  
ctg4135□ctg521□ctg555□WAG-22P21  
ctg4135□ctg521□ctg555□WAG-25G10  
ctg4135□ctg521□ctg555□WAG-33G22  
ctg4135□ctg521□ctg555□WAG-37F4  
ctg4135□ctg521□ctg555□WAG-41A12  
ctg4135□ctg521□ctg555□WAG-45M21

ctg4135□ctg521□ctg555□WAG-46F23  
ctg4135□ctg521□ctg555□WAG-53I21  
ctg4135□ctg521□ctg555□WAG-74I9  
ctg4135□ctg521□ctg555□WAG-75L7  
ctg4135□ctg521□ctg555□WAG-93K17  
ctg4135□ctg521□ctg555□WAG-109L24  
ctg4135□ctg521□ctg555□WAG-110J22  
ctg4135□ctg521□ctg555□WAG-127O6  
ctg4136□□□WAG-2M21  
ctg4136□ctg1015□ctg850□WAG-1I8  
ctg4136□ctg1015□ctg850□WAG-4I15  
ctg4136□ctg1015□ctg850□WAG-46L11  
ctg4136□ctg1015□ctg850□WAG-86D5  
ctg4136□ctg1015□ctg850□WAG-87P18  
ctg4136□ctg1015□ctg850□WAG-101G4  
ctg4136□ctg1015□ctg850□WAG-108B19  
ctg4136□ctg1015□ctg850□WAG-125G6  
ctg4136□ctg4151□□WAG-94C21  
ctg4136□ctg4151□ctg5882□WAG-14L11  
ctg4136□ctg4151□ctg5882□WAG-123F5  
ctg4136□ctg5373□ctg6327□WAG-63M19  
ctg4136□ctg5373□ctg6327□WAG-81E6  
ctg4137□□□WAG-9F6  
ctg4137□ctg294□□WAG-25F15  
ctg4137□ctg294□□WAG-105O1  
ctg4137□ctg294□ctg223□WAG-7M10  
ctg4137□ctg294□ctg223□WAG-59M20  
ctg4137□ctg294□ctg223□WAG-63I20  
ctg4137□ctg294□ctg223□WAG-79L6  
ctg4137□ctg294□ctg223□WAG-94E17  
ctg4137□ctg294□ctg223□WAG-114N10  
ctg4137□ctg294□ctg223□WAG-115A11  
ctg4137□ctg294□ctg223□WAG-119H1  
ctg4137□ctg294□ctg6356□WAG-87A18  
ctg4137□ctg294□ctg6356□WAG-125I12  
ctg4137□ctg6336□□WAG-105B8  
ctg4137□ctg6336□□WAG-113P21  
ctg4138□ctg3564□ctg3732□WAG-83O4  
ctg4138□ctg3564□ctg3732□WAG-93O6  
ctg4138□ctg3564□ctg3732□WAG-98G24  
ctg4139□□□WAG-9E1  
ctg4139□□□WAG-39N14  
ctg4139□□□WAG-74P8  
ctg4139□□□WAG-101F2  
ctg4139□ctg3708□□WAG-6E9  
ctg4139□ctg3708□ctg5077□WAG-33E9  
ctg4139□ctg3708□ctg5077□WAG-47C21  
ctg4139□ctg829□□WAG-1G9  
ctg4139□ctg829□□WAG-1N12  
ctg4139□ctg829□ctg1362□WAG-2A10  
ctg4139□ctg829□ctg1362□WAG-16P24  
ctg4139□ctg829□ctg1362□WAG-30P15  
ctg4139□ctg829□ctg1362□WAG-92C2  
ctg4139□ctg829□ctg1362□WAG-107K2  
ctg4139□ctg829□ctg1362□WAG-110K14  
ctg4139□ctg829□ctg1362□WAG-116G3

ctg4139□ctg829□ctg1362□WAG-128L1  
ctg4139□ctg829□ctg4180□WAG-13G15  
ctg4139□ctg829□ctg4180□WAG-46M1  
ctg4139□ctg829□ctg4180□WAG-120F3  
ctg414□□□WAG-I1  
ctg414□□□WAG-121N10  
ctg414□ctg1295□□WAG-10O8  
ctg414□ctg1295□□WAG-16D18  
ctg414□ctg1295□ctg2626□WAG-63G20  
ctg414□ctg1295□ctg2626□WAG-82I13  
ctg414□ctg1295□ctg2626□WAG-86N9  
ctg414□ctg1295□ctg2626□WAG-127I24  
ctg414□ctg1295□ctg5423□WAG-19B5  
ctg414□ctg1295□ctg5423□WAG-54I4  
ctg414□ctg2327□ctg2231□WAG-12A21  
ctg414□ctg2327□ctg2231□WAG-18B24  
ctg414□ctg2327□ctg2231□WAG-23P2  
ctg414□ctg3502□□WAG-5F16  
ctg414□ctg3502□□WAG-19G13  
ctg414□ctg3502□□WAG-115E10  
ctg414□ctg3502□ctg4588□WAG-24C6  
ctg414□ctg3502□ctg4588□WAG-69D3  
ctg414□ctg6319□□WAG-23E10  
ctg414□ctg6319□□WAG-34B12  
ctg4140□□□WAG-30N17  
ctg4140□□□WAG-38G21  
ctg4140□□□WAG-42J19  
ctg4140□□□WAG-64K7  
ctg4140□□□WAG-81D16  
ctg4140□ctg1325□□WAG-54K13  
ctg4140□ctg1325□ctg1492□WAG-36A14  
ctg4140□ctg1325□ctg1492□WAG-38F6  
ctg4140□ctg1325□ctg1492□WAG-41E18  
ctg4140□ctg1325□ctg1492□WAG-71H1  
ctg4140□ctg3155□ctg3173□WAG-23E13  
ctg4140□ctg3155□ctg3173□WAG-26G4  
ctg4140□ctg3155□ctg3173□WAG-61L5  
ctg4140□ctg3750□ctg3982□WAG-65N7  
ctg4140□ctg3750□ctg3982□WAG-113N19  
ctg4140□ctg399□□WAG-24J7  
ctg4140□ctg399□□WAG-110G5  
ctg4140□ctg399□□WAG-125A6  
ctg4140□ctg399□ctg553□WAG-16B14  
ctg4140□ctg399□ctg553□WAG-37N12  
ctg4140□ctg399□ctg553□WAG-50J7  
ctg4140□ctg399□ctg553□WAG-52K3  
ctg4140□ctg399□ctg553□WAG-55E20  
ctg4140□ctg399□ctg553□WAG-105F20  
ctg4140□ctg399□ctg553□WAG-116G24  
ctg4140□ctg5208□ctg5942□WAG-18F6  
ctg4140□ctg5208□ctg5942□WAG-117K16  
ctg4140□ctg5974□□WAG-38I18  
ctg4140□ctg5974□□WAG-74K8  
ctg4140□ctg930□ctg1009□WAG-44K16  
ctg4140□ctg930□ctg1009□WAG-73A13  
ctg4140□ctg930□ctg1009□WAG-78C13

ctg4140□ctg930□ctg1009□WAG-84G13  
ctg4140□ctg930□ctg1009□WAG-99A2  
ctg4141□□□WAG-122E16  
ctg4141□ctg1413□ctg1595□WAG-23N23  
ctg4141□ctg1413□ctg1595□WAG-56G6  
ctg4141□ctg1413□ctg1595□WAG-78O17  
ctg4141□ctg1413□ctg1595□WAG-108I14  
ctg4141□ctg1413□ctg1595□WAG-113I1  
ctg4141□ctg1898□□WAG-43H24  
ctg4141□ctg1898□ctg1733□WAG-35M10  
ctg4141□ctg1898□ctg1733□WAG-55H14  
ctg4141□ctg1898□ctg1733□WAG-67E1  
ctg4141□ctg1898□ctg1733□WAG-111L12  
ctg4141□ctg3335□□WAG-14M13  
ctg4141□ctg3335□□WAG-80M13  
ctg4141□ctg3335□□WAG-99M19  
ctg4141□ctg3335□□WAG-118C4  
ctg4141□ctg3335□ctg6433□WAG-15G21  
ctg4141□ctg3335□ctg6433□WAG-110P13  
ctg4141□ctg5103□ctg5698□WAG-29F21  
ctg4141□ctg5103□ctg5698□WAG-56B16  
ctg4141□ctg624□□WAG-32N21  
ctg4141□ctg624□□WAG-34P6  
ctg4141□ctg624□ctg676□WAG-26D10  
ctg4141□ctg624□ctg676□WAG-32C17  
ctg4141□ctg624□ctg676□WAG-41E24  
ctg4141□ctg624□ctg676□WAG-71B10  
ctg4141□ctg624□ctg676□WAG-86G17  
ctg4142□□□WAG-2J21  
ctg4142□□□WAG-79D10  
ctg4142□ctg1700□□WAG-5I5  
ctg4142□ctg1700□□WAG-31C18  
ctg4142□ctg1700□□WAG-113L24  
ctg4142□ctg1700□ctg2149□WAG-88A1  
ctg4142□ctg1700□ctg2149□WAG-103B12  
ctg4142□ctg1700□ctg2149□WAG-117B13  
ctg4142□ctg1700□ctg2149□WAG-128L14  
ctg4142□ctg1700□ctg3858□WAG-30K19  
ctg4142□ctg1700□ctg3858□WAG-89H22  
ctg4142□ctg1700□ctg3858□WAG-104E8  
ctg4142□ctg1700□ctg5279□WAG-87E17  
ctg4142□ctg1700□ctg5279□WAG-106N22  
ctg4143□□□WAG-31D16  
ctg4143□ctg2289□□WAG-51C13  
ctg4143□ctg2289□□WAG-51M21  
ctg4143□ctg2289□□WAG-96A24  
ctg4143□ctg2289□□WAG-109O22  
ctg4143□ctg2289□□WAG-126O17  
ctg4143□ctg2289□ctg4775□WAG-43H1  
ctg4143□ctg2289□ctg4775□WAG-44I1  
ctg4143□ctg2289□ctg5024□WAG-95L10  
ctg4143□ctg2289□ctg5024□WAG-129P19  
ctg4143□ctg2289□ctg5566□WAG-100B1  
ctg4143□ctg2289□ctg5566□WAG-106C15  
ctg4143□ctg2289□ctg6376□WAG-62M20  
ctg4143□ctg2289□ctg6376□WAG-100L4

ctg4143□ctg5526□ctg6657□WAG-35K8  
ctg4143□ctg5526□ctg6657□WAG-37L22  
ctg4144□□□WAG-E15  
ctg4144□□□WAG-34I11  
ctg4144□□□WAG-85B22  
ctg4144□ctg2035□□WAG-39O1  
ctg4144□ctg2035□ctg2462□WAG-22I2  
ctg4144□ctg2035□ctg2462□WAG-42I3  
ctg4144□ctg2035□ctg2462□WAG-101B24  
ctg4144□ctg2035□ctg2462□WAG-119E22  
ctg4144□ctg2035□ctg4418□WAG-25F11  
ctg4144□ctg2035□ctg4418□WAG-55P6  
ctg4144□ctg2035□ctg4418□WAG-101J10  
ctg4144□ctg2080□ctg1940□WAG-70P11  
ctg4144□ctg2080□ctg1940□WAG-82B16  
ctg4144□ctg2080□ctg1940□WAG-92K1  
ctg4144□ctg2080□ctg1940□WAG-96C16  
ctg4144□ctg3410□□WAG-57I5  
ctg4144□ctg3410□□WAG-100A23  
ctg4144□ctg3410□ctg4365□WAG-36I4  
ctg4144□ctg3410□ctg4365□WAG-37E16  
ctg4144□ctg3410□ctg4365□WAG-64B4  
ctg4145□□□WAG-3I7  
ctg4145□□□WAG-5J3  
ctg4145□□□WAG-21B10  
ctg4145□□□WAG-55B23  
ctg4145□ctg1526□□WAG-59I15  
ctg4145□ctg1526□ctg1373□WAG-43L22  
ctg4145□ctg1526□ctg1373□WAG-44N5  
ctg4145□ctg1526□ctg1373□WAG-45C11  
ctg4145□ctg1526□ctg1373□WAG-111D22  
ctg4145□ctg1526□ctg1373□WAG-116L8  
ctg4145□ctg943□□WAG-19A15  
ctg4145□ctg943□□WAG-27B14  
ctg4145□ctg943□□WAG-51P2  
ctg4145□ctg943□□WAG-58J12  
ctg4145□ctg943□□WAG-75H1  
ctg4145□ctg943□□WAG-88M1  
ctg4145□ctg943□□WAG-100K17  
ctg4145□ctg943□□WAG-111M23  
ctg4145□ctg943□□WAG-114H18  
ctg4145□ctg943□ctg1724□WAG-9D9  
ctg4145□ctg943□ctg1724□WAG-21K14  
ctg4145□ctg943□ctg1724□WAG-36C16  
ctg4145□ctg943□ctg1724□WAG-43H17  
ctg4145□ctg943□ctg1724□WAG-66B19  
ctg4145□ctg943□ctg1729□WAG-19O11  
ctg4145□ctg943□ctg1729□WAG-56K5  
ctg4145□ctg943□ctg1729□WAG-65P15  
ctg4145□ctg943□ctg1729□WAG-86M19  
ctg4145□ctg943□ctg1729□WAG-93L17  
ctg4145□ctg943□ctg2118□WAG-61C21  
ctg4145□ctg943□ctg2118□WAG-71K24  
ctg4145□ctg943□ctg2118□WAG-105J4  
ctg4145□ctg943□ctg4176□WAG-75M19  
ctg4145□ctg943□ctg4176□WAG-101E12

ctg4145□ctg943□ctg4176□WAG-102N5  
ctg4145□ctg943□ctg5596□WAG-50I9  
ctg4145□ctg943□ctg5596□WAG-55M12  
ctg4146□□□WAG-61G11  
ctg4146□□□WAG-72J9  
ctg4146□□□WAG-82A9  
ctg4146□□□WAG-125K11  
ctg4146□ctg2202□□WAG-32J7  
ctg4146□ctg2202□ctg2079□WAG-9P21  
ctg4146□ctg2202□ctg2079□WAG-21E19  
ctg4146□ctg2202□ctg2079□WAG-99C4  
ctg4146□ctg2202□ctg2079□WAG-110E1  
ctg4146□ctg2202□ctg2079□WAG-119A24  
ctg4146□ctg2202□ctg2079□WAG-128E21  
ctg4146□ctg2202□ctg3407□WAG-16N24  
ctg4146□ctg2202□ctg3407□WAG-51L3  
ctg4146□ctg2202□ctg3407□WAG-79O2  
ctg4146□ctg2223□ctg2102□WAG-16M18  
ctg4146□ctg2223□ctg2102□WAG-20K9  
ctg4146□ctg2223□ctg2102□WAG-55H7  
ctg4146□ctg2223□ctg2102□WAG-71H5  
ctg4146□ctg2564□ctg2508□WAG-4H17  
ctg4146□ctg2564□ctg2508□WAG-28C20  
ctg4146□ctg2564□ctg2508□WAG-122D16  
ctg4146□ctg460□ctg788□WAG-34L10  
ctg4146□ctg460□ctg788□WAG-46I3  
ctg4146□ctg460□ctg788□WAG-48D10  
ctg4146□ctg460□ctg788□WAG-52G17  
ctg4146□ctg460□ctg788□WAG-70M18  
ctg4146□ctg460□ctg788□WAG-73J10  
ctg4146□ctg460□ctg788□WAG-80D10  
ctg4146□ctg460□ctg788□WAG-87L9  
ctg4146□ctg460□ctg788□WAG-88C20  
ctg4146□ctg460□ctg788□WAG-118H17  
ctg4146□ctg460□ctg788□WAG-118P22  
ctg4146□ctg460□ctg788□WAG-119E3  
ctg4146□ctg5453□ctg6503□WAG-28G22  
ctg4146□ctg5453□ctg6503□WAG-47G1  
ctg4146□ctg5715□ctg6867□WAG-34K2  
ctg4146□ctg5715□ctg6867□WAG-105K21  
ctg4146□ctg963□□□WAG-2F10  
ctg4146□ctg963□□□WAG-39B6  
ctg4146□ctg963□□□WAG-100I3  
ctg4146□ctg963□ctg1061□WAG-38F24  
ctg4146□ctg963□ctg1061□WAG-42K5  
ctg4146□ctg963□ctg1061□WAG-51F3  
ctg4146□ctg963□ctg1061□WAG-63I13  
ctg4146□ctg963□ctg1061□WAG-65O5  
ctg4146□ctg963□ctg1061□WAG-80D5  
ctg4146□ctg963□ctg1061□WAG-113P11  
ctg4146□ctg963□ctg1061□WAG-117I16  
ctg4147□ctg1322□□□WAG-40I24  
ctg4147□ctg1322□□□WAG-119H14  
ctg4147□ctg1322□□□WAG-126E10  
ctg4147□ctg1322□ctg1881□WAG-15A23  
ctg4147□ctg1322□ctg1881□WAG-22I24

ctg4147□ctg1322□ctg1881□WAG-41O11  
ctg4147□ctg1322□ctg1881□WAG-43P9  
ctg4147□ctg1322□ctg1881□WAG-78B18  
ctg4147□ctg1322□ctg1881□WAG-90E16  
ctg4147□ctg1322□ctg1881□WAG-101I15  
ctg4147□ctg1662□□WAG-20N12  
ctg4147□ctg1662□□WAG-50D18  
ctg4147□ctg1662□□WAG-75G17  
ctg4147□ctg1662□ctg1513□WAG-22B14  
ctg4147□ctg1662□ctg1513□WAG-26B3  
ctg4147□ctg1662□ctg1513□WAG-107O13  
ctg4147□ctg1662□ctg1513□WAG-114F20  
ctg4147□ctg1662□ctg1513□WAG-116A16  
ctg4147□ctg1662□ctg1513□WAG-118D23  
ctg4147□ctg249□□WAG-31K3  
ctg4147□ctg249□ctg318□WAG-20O4  
ctg4147□ctg249□ctg318□WAG-23O7  
ctg4147□ctg249□ctg318□WAG-45C19  
ctg4147□ctg249□ctg318□WAG-50O5  
ctg4147□ctg249□ctg318□WAG-90F17  
ctg4147□ctg249□ctg318□WAG-96I4  
ctg4147□ctg249□ctg318□WAG-98K23  
ctg4147□ctg249□ctg318□WAG-125K12  
ctg4147□ctg249□ctg318□WAG-129F7  
ctg4147□ctg5200□ctg5918□WAG-19D3  
ctg4147□ctg5200□ctg5918□WAG-63F13  
ctg4147□ctg6558□□WAG-14E23  
ctg4147□ctg6558□□WAG-77M1  
ctg4148□□□WAG-11K3  
ctg4148□□□WAG-13J3  
ctg4148□□□WAG-29D16  
ctg4148□□□WAG-34G6  
ctg4148□□□WAG-62I14  
ctg4148□□□WAG-125H8  
ctg4148□□□WAG-130K14  
ctg4148□ctg1005□ctg1166□WAG-24H19  
ctg4148□ctg1005□ctg1166□WAG-36I8  
ctg4148□ctg1005□ctg1166□WAG-64M5  
ctg4148□ctg1005□ctg1166□WAG-73B16  
ctg4148□ctg1005□ctg1166□WAG-76L12  
ctg4148□ctg1005□ctg1166□WAG-83K23  
ctg4148□ctg1005□ctg1166□WAG-97A21  
ctg4148□ctg1005□ctg1166□WAG-103O4  
ctg4148□ctg1005□ctg1166□WAG-115H18  
ctg4148□ctg1051□□WAG-60J17  
ctg4148□ctg1051□ctg889□WAG-6O11  
ctg4148□ctg1051□ctg889□WAG-30A3  
ctg4148□ctg1051□ctg889□WAG-40M8  
ctg4148□ctg1051□ctg889□WAG-61K4  
ctg4148□ctg1051□ctg889□WAG-65J20  
ctg4148□ctg1051□ctg889□WAG-92D11  
ctg4148□ctg1051□ctg889□WAG-116O17  
ctg4148□ctg1173□□WAG-1G12  
ctg4148□ctg1173□ctg1020□WAG-48N24  
ctg4148□ctg1173□ctg1020□WAG-70C7  
ctg4148□ctg1173□ctg1020□WAG-83B5



ctg4148□ctg1173□ctg1020□WAG-111E7  
ctg4148□ctg1825□□WAG-74J23  
ctg4148□ctg1825□□WAG-121P18  
ctg4148□ctg1825□□WAG-130J7  
ctg4148□ctg1825□ctg2148□WAG-25B23  
ctg4148□ctg1825□ctg2148□WAG-47N3  
ctg4148□ctg1825□ctg2148□WAG-66M5  
ctg4148□ctg1825□ctg2148□WAG-69G11  
ctg4148□ctg1825□ctg2148□WAG-79A14  
ctg4148□ctg1825□ctg2148□WAG-117K3  
ctg4148□ctg1825□ctg2148□WAG-123N17  
ctg4148□ctg1825□ctg3058□WAG-34I16  
ctg4148□ctg1825□ctg3058□WAG-56D16  
ctg4148□ctg1825□ctg3058□WAG-102F19  
ctg4148□ctg1825□ctg3058□WAG-123P5  
ctg4148□ctg1825□ctg4811□WAG-56I8  
ctg4148□ctg1825□ctg4811□WAG-95P14  
ctg4148□ctg1825□ctg6506□WAG-37M2  
ctg4148□ctg1825□ctg6506□WAG-75J19  
ctg4148□ctg1960□□WAG-80A8  
ctg4148□ctg1960□ctg1799□WAG-21L13  
ctg4148□ctg1960□ctg1799□WAG-72A9  
ctg4148□ctg1960□ctg1799□WAG-78M7  
ctg4148□ctg1960□ctg2735□WAG-49B18  
ctg4148□ctg1960□ctg2735□WAG-100A20  
ctg4148□ctg1960□ctg2735□WAG-109K8  
ctg4148□ctg1960□ctg2735□WAG-127P20  
ctg4148□ctg1967□ctg1815□WAG-2O15  
ctg4148□ctg1967□ctg1815□WAG-13G2  
ctg4148□ctg1967□ctg1815□WAG-62O4  
ctg4148□ctg1967□ctg1815□WAG-126J1  
ctg4148□ctg2018□ctg2437□WAG-62H2  
ctg4148□ctg2018□ctg2437□WAG-69I8  
ctg4148□ctg2018□ctg2437□WAG-97J11  
ctg4148□ctg2018□ctg2437□WAG-115N9  
ctg4148□ctg2018□ctg2437□WAG-124D22  
ctg4148□ctg3846□□WAG-57J16  
ctg4148□ctg3846□□WAG-126F5  
ctg4148□ctg3846□ctg5520□WAG-19O18  
ctg4148□ctg3846□ctg5520□WAG-118G14  
ctg4148□ctg6275□□WAG-18N7  
ctg4148□ctg6275□□WAG-128O23  
ctg4149□□□WAG-128M7  
ctg4149□ctg1125□ctg2017□WAG-13G16  
ctg4149□ctg1125□ctg2017□WAG-24D18  
ctg4149□ctg1125□ctg2017□WAG-57M15  
ctg4149□ctg1125□ctg2017□WAG-75B2  
ctg4149□ctg1125□ctg2017□WAG-75K1  
ctg4149□ctg1125□ctg2017□WAG-85K14  
ctg4149□ctg1125□ctg2017□WAG-109P13  
ctg4149□ctg1125□ctg2017□WAG-124A7  
ctg4149□ctg1125□ctg4203□WAG-33G17  
ctg4149□ctg1125□ctg4203□WAG-34K20  
ctg4149□ctg1125□ctg4203□WAG-45D2  
ctg415□□□WAG-57F16  
ctg415□ctg1146□□WAG-110E23

ctg415□ctg1146□ctg982□WAG-3I24  
ctg415□ctg1146□ctg982□WAG-5P3  
ctg415□ctg1146□ctg982□WAG-23F8  
ctg415□ctg1146□ctg982□WAG-63M17  
ctg415□ctg1146□ctg982□WAG-72A24  
ctg415□ctg1146□ctg982□WAG-121G11  
ctg415□ctg1146□ctg982□WAG-130C20  
ctg4150□□□WAG-12D13  
ctg4150□□□WAG-24G14  
ctg4150□□□WAG-28J9  
ctg4150□ctg307□□WAG-26C21  
ctg4150□ctg307□□WAG-115C4  
ctg4150□ctg307□ctg489□WAG-20I13  
ctg4150□ctg307□ctg489□WAG-24E8  
ctg4150□ctg307□ctg489□WAG-33C4  
ctg4150□ctg307□ctg489□WAG-47F23  
ctg4150□ctg307□ctg489□WAG-67M14  
ctg4150□ctg307□ctg489□WAG-72B8  
ctg4150□ctg307□ctg489□WAG-84L11  
ctg4150□ctg307□ctg489□WAG-88H15  
ctg4150□ctg307□ctg489□WAG-92H3  
ctg4150□ctg307□ctg489□WAG-94F21  
ctg4150□ctg307□ctg489□WAG-96J22  
ctg4150□ctg307□ctg489□WAG-108F19  
ctg4150□ctg307□ctg489□WAG-127B3  
ctg4150□ctg3223□ctg3251□WAG-56K1  
ctg4150□ctg3223□ctg3251□WAG-64I4  
ctg4150□ctg3223□ctg3251□WAG-80P15  
ctg4150□ctg4891□ctg5215□WAG-85K1  
ctg4150□ctg4891□ctg5215□WAG-105L5  
ctg4151□□□WAG-29H14  
ctg4151□□□WAG-29N4  
ctg4151□□□WAG-33L15  
ctg4151□□□WAG-57C15  
ctg4151□□□WAG-77E3  
ctg4151□□□WAG-114J6  
ctg4151□□□WAG-123P2  
ctg4151□ctg1638□□WAG-89K23  
ctg4151□ctg1638□ctg1697□WAG-41N12  
ctg4151□ctg1638□ctg1697□WAG-53E17  
ctg4151□ctg1638□ctg1697□WAG-65K14  
ctg4151□ctg1638□ctg1697□WAG-88H11  
ctg4151□ctg1842□ctg2248□WAG-27P17  
ctg4151□ctg1842□ctg2248□WAG-68P2  
ctg4151□ctg1842□ctg2248□WAG-80D9  
ctg4151□ctg1842□ctg2248□WAG-87J12  
ctg4151□ctg1842□ctg2248□WAG-111A7  
ctg4151□ctg445□ctg357□WAG-23M14  
ctg4151□ctg445□ctg357□WAG-105O15  
ctg4151□ctg445□ctg357□WAG-125P23  
ctg4151□ctg445□ctg357□WAG-127K8  
ctg4151□ctg6408□□WAG-42P12  
ctg4151□ctg6408□□WAG-110F6  
ctg4151□ctg643□□WAG-106L2  
ctg4151□ctg643□ctg2774□WAG-20M8  
ctg4151□ctg643□ctg2774□WAG-50E10

ctg4151□ctg643□ctg2774□WAG-62K23  
ctg4151□ctg643□ctg833□WAG-17N17  
ctg4151□ctg643□ctg833□WAG-20M5  
ctg4151□ctg643□ctg833□WAG-57O16  
ctg4151□ctg643□ctg833□WAG-64C11  
ctg4151□ctg643□ctg833□WAG-69L23  
ctg4151□ctg643□ctg833□WAG-106E11  
ctg4151□ctg643□ctg833□WAG-113I22  
ctg4151□ctg643□ctg833□WAG-129H13  
ctg4151□ctg774□ctg813□WAG-9K3  
ctg4151□ctg774□ctg813□WAG-38L12  
ctg4151□ctg774□ctg813□WAG-40P4  
ctg4151□ctg774□ctg813□WAG-55H23  
ctg4151□ctg774□ctg813□WAG-58G3  
ctg4151□ctg774□ctg813□WAG-58O11  
ctg4151□ctg774□ctg813□WAG-60K10  
ctg4151□ctg774□ctg813□WAG-62J13  
ctg4151□ctg774□ctg813□WAG-65O3  
ctg4151□ctg774□ctg813□WAG-68O5  
ctg4151□ctg774□ctg813□WAG-76L13  
ctg4151□ctg774□ctg813□WAG-85G13  
ctg4151□ctg774□ctg813□WAG-87F23  
ctg4151□ctg774□ctg813□WAG-87L13  
ctg4151□ctg774□ctg813□WAG-101J15  
ctg4151□ctg774□ctg813□WAG-105D13  
ctg4152□□□WAG-1L18  
ctg4152□□□WAG-19K21  
ctg4152□□□WAG-41F21  
ctg4152□□□WAG-87A15  
ctg4152□ctg2739□□WAG-45L21  
ctg4152□ctg2739□ctg3314□WAG-54A8  
ctg4152□ctg2739□ctg3314□WAG-100H1  
ctg4152□ctg2739□ctg3314□WAG-105A19  
ctg4152□ctg2800□ctg2947□WAG-19P8  
ctg4152□ctg2800□ctg2947□WAG-50O18  
ctg4152□ctg2800□ctg2947□WAG-91L3  
ctg4152□ctg2800□ctg6482□WAG-15I23  
ctg4152□ctg2800□ctg6482□WAG-69F4  
ctg4152□ctg5737□ctg6882□WAG-19H8  
ctg4152□ctg5737□ctg6882□WAG-46L10  
ctg4152□ctg584□□WAG-10A17  
ctg4152□ctg584□ctg473□WAG-35N12  
ctg4152□ctg584□ctg473□WAG-40P2  
ctg4152□ctg584□ctg473□WAG-41F24  
ctg4152□ctg584□ctg473□WAG-52I6  
ctg4152□ctg584□ctg473□WAG-55A24  
ctg4152□ctg584□ctg473□WAG-96A21  
ctg4152□ctg584□ctg473□WAG-101I9  
ctg4152□ctg584□ctg473□WAG-110G21  
ctg4152□ctg584□ctg473□WAG-112D10  
ctg4152□ctg584□ctg473□WAG-121B7  
ctg4152□ctg692□ctg2160□WAG-47C4  
ctg4152□ctg692□ctg2160□WAG-106M13  
ctg4152□ctg692□ctg2160□WAG-117O15  
ctg4152□ctg692□ctg561□WAG-11F5  
ctg4152□ctg692□ctg561□WAG-33G3

ctg4152□ctg692□ctg561□WAG-37H17  
ctg4152□ctg692□ctg561□WAG-69B9  
ctg4152□ctg692□ctg561□WAG-69L12  
ctg4152□ctg692□ctg561□WAG-100A9  
ctg4152□ctg692□ctg561□WAG-100E24  
ctg4152□ctg692□ctg561□WAG-114C24  
ctg4152□ctg757□□WAG-17D17  
ctg4152□ctg757□□WAG-21L18  
ctg4152□ctg757□□WAG-41M24  
ctg4152□ctg757□□WAG-130J16  
ctg4152□ctg757□ctg1034□WAG-7D3  
ctg4152□ctg757□ctg1034□WAG-7E3  
ctg4152□ctg757□ctg1034□WAG-28H20  
ctg4152□ctg757□ctg1034□WAG-45N6  
ctg4152□ctg757□ctg1034□WAG-48M15  
ctg4152□ctg757□ctg1034□WAG-63F7  
ctg4152□ctg757□ctg1034□WAG-77F6  
ctg4152□ctg757□ctg1034□WAG-117B1  
ctg4152□ctg757□ctg1708□WAG-118E23  
ctg4152□ctg757□ctg1708□WAG-120M24  
ctg4152□ctg757□ctg1708□WAG-125N21  
ctg4153□□□WAG-1M12  
ctg4153□□□WAG-1O14  
ctg4153□ctg1973□ctg2364□WAG-25B20  
ctg4153□ctg1973□ctg2364□WAG-71J23  
ctg4153□ctg1973□ctg2364□WAG-87M12  
ctg4153□ctg1973□ctg2364□WAG-123M10  
ctg4153□ctg1973□ctg4814□WAG-1J22  
ctg4153□ctg1973□ctg4814□WAG-2G5  
ctg4153□ctg373□ctg369□WAG-4D9  
ctg4153□ctg373□ctg369□WAG-17F22  
ctg4153□ctg373□ctg369□WAG-21H10  
ctg4153□ctg373□ctg369□WAG-24C22  
ctg4153□ctg373□ctg369□WAG-25D5  
ctg4153□ctg373□ctg369□WAG-31N3  
ctg4153□ctg373□ctg369□WAG-35C2  
ctg4153□ctg373□ctg369□WAG-59B7  
ctg4153□ctg373□ctg369□WAG-59J14  
ctg4153□ctg373□ctg369□WAG-124H4  
ctg4153□ctg373□ctg369□WAG-126K4  
ctg4153□ctg5700□□WAG-47F11  
ctg4153□ctg5700□□WAG-101P24  
ctg4153□ctg882□ctg724□WAG-9N5  
ctg4153□ctg882□ctg724□WAG-19M7  
ctg4153□ctg882□ctg724□WAG-42O12  
ctg4153□ctg882□ctg724□WAG-64M22  
ctg4153□ctg882□ctg724□WAG-81O3  
ctg4153□ctg882□ctg724□WAG-100N1  
ctg4153□ctg882□ctg724□WAG-111L15  
ctg4154□□□WAG-32D6  
ctg4154□□□WAG-125L15  
ctg4154□ctg241□□WAG-23J5  
ctg4154□ctg241□□WAG-69B24  
ctg4154□ctg241□□WAG-72D1  
ctg4154□ctg241□□WAG-77G17  
ctg4154□ctg241□ctg1237□WAG-65P2

ctg4154□ctg241□ctg1237□WAG-78J17  
ctg4154□ctg241□ctg1237□WAG-126F9  
ctg4154□ctg241□ctg1237□WAG-128O20  
ctg4154□ctg241□ctg192□WAG-1A12  
ctg4154□ctg241□ctg192□WAG-30C24  
ctg4154□ctg241□ctg192□WAG-33M17  
ctg4154□ctg241□ctg192□WAG-46L22  
ctg4154□ctg241□ctg192□WAG-59J2  
ctg4154□ctg241□ctg192□WAG-76N20  
ctg4154□ctg241□ctg192□WAG-96L17  
ctg4154□ctg241□ctg192□WAG-97G13  
ctg4154□ctg241□ctg192□WAG-103D18  
ctg4154□ctg241□ctg192□WAG-111E24  
ctg4154□ctg241□ctg192□WAG-128I1  
ctg4154□ctg241□ctg3699□WAG-59C24  
ctg4154□ctg241□ctg3699□WAG-67N23  
ctg4154□ctg241□ctg3699□WAG-70E13  
ctg4154□ctg241□ctg3699□WAG-124D4  
ctg4154□ctg241□ctg476□WAG-7L23  
ctg4154□ctg241□ctg476□WAG-17M2  
ctg4154□ctg241□ctg476□WAG-24K22  
ctg4154□ctg241□ctg476□WAG-47B1  
ctg4154□ctg241□ctg476□WAG-52E12  
ctg4154□ctg241□ctg476□WAG-59I2  
ctg4154□ctg241□ctg476□WAG-60F9  
ctg4154□ctg241□ctg476□WAG-70C4  
ctg4154□ctg241□ctg476□WAG-87O21  
ctg4154□ctg241□ctg476□WAG-95J24  
ctg4154□ctg241□ctg476□WAG-114D19  
ctg4154□ctg241□ctg476□WAG-115L8  
ctg4154□ctg241□ctg476□WAG-120I23  
ctg4154□ctg241□ctg476□WAG-125N10  
ctg4154□ctg241□ctg476□WAG-127C11  
ctg4154□ctg241□ctg5604□WAG-4L20  
ctg4154□ctg241□ctg5604□WAG-5I20  
ctg4154□ctg4528□□WAG-2B24  
ctg4154□ctg4528□□WAG-69K18  
ctg4154□ctg4528□□WAG-84F22  
ctg4154□ctg5450□ctg6492□WAG-53H3  
ctg4154□ctg5450□ctg6492□WAG-66H23  
ctg4155□□□WAG-91B9  
ctg4155□ctg120□□WAG-14O22  
ctg4155□ctg120□□WAG-48O19  
ctg4155□ctg120□ctg176□WAG-15F7  
ctg4155□ctg120□ctg176□WAG-45G24  
ctg4155□ctg120□ctg176□WAG-49C7  
ctg4155□ctg120□ctg176□WAG-57E9  
ctg4155□ctg120□ctg176□WAG-60N11  
ctg4155□ctg120□ctg176□WAG-72A17  
ctg4155□ctg120□ctg176□WAG-85E9  
ctg4155□ctg120□ctg176□WAG-90O14  
ctg4155□ctg120□ctg176□WAG-100P18  
ctg4155□ctg120□ctg176□WAG-104B20  
ctg4155□ctg120□ctg176□WAG-115E13  
ctg4155□ctg120□ctg176□WAG-127J10  
ctg4155□ctg120□ctg176□WAG-128L4

ctg4155□ctg756□□WAG-36D6  
ctg4155□ctg756□□WAG-60D12  
ctg4155□ctg756□ctg1611□WAG-9A20  
ctg4155□ctg756□ctg1611□WAG-15D6  
ctg4155□ctg756□ctg1611□WAG-15D14  
ctg4155□ctg756□ctg1611□WAG-65P9  
ctg4155□ctg756□ctg1611□WAG-121N11  
ctg4155□ctg756□ctg6073□WAG-67J24  
ctg4155□ctg756□ctg6073□WAG-99A7  
ctg4155□ctg756□ctg799□WAG-10I1  
ctg4155□ctg756□ctg799□WAG-11O10  
ctg4155□ctg756□ctg799□WAG-12L17  
ctg4155□ctg756□ctg799□WAG-23E19  
ctg4155□ctg756□ctg799□WAG-83N5  
ctg4155□ctg756□ctg799□WAG-112C23  
ctg4155□ctg756□ctg799□WAG-117G19  
ctg4156□□□WAG-34L14  
ctg4156□□□WAG-94N5  
ctg4156□ctg124□ctg100□WAG-10P4  
ctg4156□ctg124□ctg100□WAG-43I23  
ctg4156□ctg124□ctg100□WAG-46J11  
ctg4156□ctg124□ctg100□WAG-51F18  
ctg4156□ctg124□ctg100□WAG-94O1  
ctg4156□ctg124□ctg100□WAG-104B16  
ctg4156□ctg124□ctg100□WAG-106I15  
ctg4156□ctg124□ctg100□WAG-116L7  
ctg4156□ctg124□ctg100□WAG-121H12  
ctg4156□ctg124□ctg100□WAG-121H15  
ctg4156□ctg2591□□WAG-26I10  
ctg4156□ctg2591□□WAG-37J5  
ctg4156□ctg2591□□WAG-50N24  
ctg4156□ctg2591□□WAG-68J6  
ctg4156□ctg2591□□WAG-76G3  
ctg4156□ctg2591□ctg4419□WAG-33E6  
ctg4156□ctg2591□ctg4419□WAG-61B17  
ctg4156□ctg2591□ctg4419□WAG-70O17  
ctg4156□ctg2591□ctg6185□WAG-15G14  
ctg4156□ctg2591□ctg6185□WAG-52A13  
ctg4156□ctg5602□ctg6775□WAG-22E18  
ctg4156□ctg5602□ctg6775□WAG-78J10  
ctg4156□ctg588□□WAG-120D5  
ctg4156□ctg588□□WAG-123K17  
ctg4156□ctg588□ctg586□WAG-19J21  
ctg4156□ctg588□ctg586□WAG-25P6  
ctg4156□ctg588□ctg586□WAG-65K16  
ctg4156□ctg588□ctg586□WAG-76O24  
ctg4156□ctg588□ctg586□WAG-82P13  
ctg4156□ctg588□ctg586□WAG-94D23  
ctg4156□ctg588□ctg586□WAG-98M6  
ctg4156□ctg588□ctg586□WAG-117F9  
ctg4156□ctg588□ctg586□WAG-128M4  
ctg4157□□□WAG-28A24  
ctg4157□ctg2603□ctg3355□WAG-61C12  
ctg4157□ctg2603□ctg3355□WAG-109I11  
ctg4157□ctg2603□ctg3355□WAG-110L11  
ctg4157□ctg2603□ctg3355□WAG-125J3

ctg4157□ctg2804□□WAG-78B1  
ctg4157□ctg2804□ctg2798□WAG-66M2  
ctg4157□ctg2804□ctg2798□WAG-101E5  
ctg4157□ctg2804□ctg2798□WAG-101M1  
ctg4158□□□WAG-121N22  
ctg4158□ctg295□ctg238□WAG-19C21  
ctg4158□ctg295□ctg238□WAG-38B5  
ctg4158□ctg295□ctg238□WAG-40A9  
ctg4158□ctg295□ctg238□WAG-42D13  
ctg4158□ctg295□ctg238□WAG-54C15  
ctg4158□ctg295□ctg238□WAG-71P17  
ctg4158□ctg295□ctg238□WAG-72G17  
ctg4158□ctg295□ctg238□WAG-75C8  
ctg4158□ctg295□ctg238□WAG-78C11  
ctg4158□ctg295□ctg238□WAG-92D5  
ctg4158□ctg295□ctg238□WAG-96F16  
ctg4158□ctg295□ctg238□WAG-103P19  
ctg4158□ctg295□ctg238□WAG-112E14  
ctg4158□ctg295□ctg238□WAG-119D21  
ctg4158□ctg4362□ctg4543□WAG-35C16  
ctg4158□ctg4362□ctg4543□WAG-35E22  
ctg4158□ctg451□ctg362□WAG-7H18  
ctg4158□ctg451□ctg362□WAG-12J2  
ctg4158□ctg451□ctg362□WAG-26K20  
ctg4158□ctg451□ctg362□WAG-39N16  
ctg4158□ctg451□ctg362□WAG-50M21  
ctg4158□ctg451□ctg362□WAG-70A9  
ctg4158□ctg451□ctg362□WAG-71F19  
ctg4158□ctg451□ctg362□WAG-73H2  
ctg4158□ctg451□ctg362□WAG-78O15  
ctg4158□ctg451□ctg362□WAG-118C10  
ctg4158□ctg451□ctg362□WAG-127H14  
ctg4159□□□WAG-D11  
ctg4159□□□WAG-27B16  
ctg4159□□□WAG-96M17  
ctg4159□□□WAG-101H8  
ctg4159□ctg1527□□WAG-19E6  
ctg4159□ctg1527□□WAG-25I23  
ctg4159□ctg1527□□WAG-72M11  
ctg4159□ctg1527□□WAG-107A19  
ctg4159□ctg1527□□WAG-112H5  
ctg4159□ctg1527□ctg2366□WAG-35I13  
ctg4159□ctg1527□ctg2366□WAG-36B6  
ctg4159□ctg1527□ctg2366□WAG-56B17  
ctg4159□ctg1527□ctg2366□WAG-84J8  
ctg4159□ctg1527□ctg2366□WAG-94N19  
ctg4159□ctg1527□ctg2366□WAG-116C14  
ctg4159□ctg946□□WAG-5P14  
ctg4159□ctg946□□WAG-130G10  
ctg4159□ctg946□ctg1049□WAG-34A18  
ctg4159□ctg946□ctg1049□WAG-79A19  
ctg4159□ctg946□ctg1049□WAG-94L20  
ctg4159□ctg946□ctg1049□WAG-94L23  
ctg4159□ctg946□ctg1049□WAG-101M19  
ctg4159□ctg946□ctg1049□WAG-113D20  
ctg416□□□WAG-114E19

ctg416□ctg1061□□WAG-32M5  
ctg416□ctg1061□□WAG-113M1  
ctg416□ctg1061□ctg1024□WAG-41L21  
ctg416□ctg1061□ctg1024□WAG-57H15  
ctg416□ctg1061□ctg1024□WAG-70B18  
ctg416□ctg1061□ctg1024□WAG-78I18  
ctg416□ctg1061□ctg1024□WAG-86A19  
ctg416□ctg1061□ctg1024□WAG-123N20  
ctg416□ctg1061□ctg2934□WAG-10M7  
ctg416□ctg1061□ctg2934□WAG-89L16  
ctg416□ctg1061□ctg2934□WAG-130B3  
ctg4160□□□WAG-91A20  
ctg4160□ctg2002□ctg1849□WAG-50B22  
ctg4160□ctg2002□ctg1849□WAG-56M1  
ctg4160□ctg2002□ctg1849□WAG-108H12  
ctg4160□ctg4600□□WAG-59O11  
ctg4160□ctg4600□□WAG-78P5  
ctg4160□ctg4600□□WAG-115I13  
ctg4160□ctg5579□□WAG-19C24  
ctg4160□ctg5579□□WAG-129B15  
ctg4161□□□WAG-35K18  
ctg4161□ctg4500□ctg4632□WAG-4E5  
ctg4161□ctg4500□ctg4632□WAG-75P21  
ctg4161□ctg5252□ctg6052□WAG-70G22  
ctg4161□ctg5252□ctg6052□WAG-114A12  
ctg4161□ctg6324□□WAG-13O18  
ctg4161□ctg6324□□WAG-43O11  
ctg4161□ctg751□□WAG-129M24  
ctg4161□ctg751□ctg1023□WAG-4P12  
ctg4161□ctg751□ctg1023□WAG-46K5  
ctg4161□ctg751□ctg1023□WAG-59A21  
ctg4161□ctg751□ctg1023□WAG-61K16  
ctg4161□ctg751□ctg1023□WAG-85G14  
ctg4161□ctg751□ctg1023□WAG-95C16  
ctg4161□ctg751□ctg1023□WAG-106C14  
ctg4161□ctg751□ctg1023□WAG-110D14  
ctg4161□ctg751□ctg1906□WAG-1B20  
ctg4161□ctg751□ctg1906□WAG-18F7  
ctg4161□ctg751□ctg1906□WAG-50M16  
ctg4161□ctg751□ctg1906□WAG-65E23  
ctg4161□ctg751□ctg1906□WAG-79I16  
ctg4161□ctg751□ctg1906□WAG-108M9  
ctg4161□ctg751□ctg2469□WAG-31H19  
ctg4161□ctg751□ctg2469□WAG-110D2  
ctg4161□ctg751□ctg2469□WAG-117O5  
ctg4161□ctg751□ctg2469□WAG-122M2  
ctg4162□ctg1350□□WAG-16H2  
ctg4162□ctg1350□□WAG-34H20  
ctg4162□ctg1350□ctg1192□WAG-109L16  
ctg4162□ctg1350□ctg1192□WAG-113H11  
ctg4162□ctg1350□ctg1192□WAG-117A20  
ctg4162□ctg1350□ctg1192□WAG-126J14  
ctg4162□ctg52□□WAG-78E8  
ctg4162□ctg52□ctg1671□WAG-36A20  
ctg4162□ctg52□ctg1671□WAG-74D7  
ctg4162□ctg52□ctg1671□WAG-127I20



ctg4162□ctg52□ctg388□WAG-6P2  
ctg4162□ctg52□ctg388□WAG-16M21  
ctg4162□ctg52□ctg388□WAG-17G19  
ctg4162□ctg52□ctg388□WAG-67A8  
ctg4162□ctg52□ctg388□WAG-73K19  
ctg4162□ctg52□ctg388□WAG-98B13  
ctg4162□ctg52□ctg388□WAG-101F18  
ctg4162□ctg52□ctg388□WAG-122P17  
ctg4162□ctg52□ctg388□WAG-126L20  
ctg4162□ctg52□ctg52□WAG-18K23  
ctg4162□ctg52□ctg52□WAG-22B3  
ctg4162□ctg52□ctg52□WAG-41O10  
ctg4162□ctg52□ctg52□WAG-56K4  
ctg4162□ctg52□ctg52□WAG-60C13  
ctg4162□ctg52□ctg52□WAG-85O4  
ctg4162□ctg52□ctg52□WAG-87M18  
ctg4162□ctg52□ctg52□WAG-90O16  
ctg4162□ctg52□ctg52□WAG-92E9  
ctg4162□ctg52□ctg52□WAG-93K18  
ctg4162□ctg52□ctg52□WAG-107G21  
ctg4162□ctg52□ctg52□WAG-117H13  
ctg4162□ctg52□ctg52□WAG-126F20  
ctg4162□ctg6061□□WAG-19N14  
ctg4162□ctg6061□□WAG-81N21  
ctg4162□ctg630□□WAG-94F5  
ctg4162□ctg630□□WAG-118A7  
ctg4162□ctg630□ctg1879□WAG-14P10  
ctg4162□ctg630□ctg1879□WAG-23P10  
ctg4162□ctg630□ctg1879□WAG-39B8  
ctg4162□ctg630□ctg1879□WAG-39L17  
ctg4162□ctg630□ctg1879□WAG-44G24  
ctg4162□ctg630□ctg1879□WAG-50C7  
ctg4162□ctg630□ctg1879□WAG-101C14  
ctg4162□ctg630□ctg1879□WAG-103P6  
ctg4162□ctg630□ctg1879□WAG-110F13  
ctg4162□ctg630□ctg4815□WAG-127O4  
ctg4162□ctg630□ctg4815□WAG-129E14  
ctg4163□ctg378□□WAG-75O2  
ctg4163□ctg378□ctg373□WAG-28D8  
ctg4163□ctg378□ctg373□WAG-40G5  
ctg4163□ctg378□ctg373□WAG-54K22  
ctg4163□ctg378□ctg373□WAG-56D22  
ctg4163□ctg378□ctg373□WAG-78H8  
ctg4163□ctg378□ctg373□WAG-97L1  
ctg4163□ctg378□ctg373□WAG-98M11  
ctg4163□ctg378□ctg373□WAG-104K22  
ctg4163□ctg378□ctg373□WAG-109H18  
ctg4163□ctg378□ctg373□WAG-126K2  
ctg4163□ctg378□ctg373□WAG-126P1  
ctg4163□ctg4749□ctg4947□WAG-96J12  
ctg4163□ctg4749□ctg4947□WAG-104I22  
ctg4164□□□WAG-59H9  
ctg4164□ctg4550□□WAG-24G19  
ctg4164□ctg4550□□WAG-51N18  
ctg4164□ctg4550□□WAG-104J11  
ctg4164□ctg4550□□WAG-110D13

ctg4165□□□WAG-11L11  
ctg4165□□□WAG-91M19  
ctg4165□ctg4035□ctg4295□WAG-80O1  
ctg4165□ctg4035□ctg4295□WAG-82L24  
ctg4165□ctg463□□WAG-3H22  
ctg4165□ctg463□ctg374□WAG-14C4  
ctg4165□ctg463□ctg374□WAG-22C24  
ctg4165□ctg463□ctg374□WAG-40O11  
ctg4165□ctg463□ctg374□WAG-77K9  
ctg4165□ctg463□ctg374□WAG-77M3  
ctg4165□ctg463□ctg374□WAG-127E17  
ctg4165□ctg823□ctg673□WAG-1F23  
ctg4165□ctg823□ctg673□WAG-2I5  
ctg4165□ctg823□ctg673□WAG-57I16  
ctg4165□ctg823□ctg673□WAG-97O16  
ctg4165□ctg823□ctg673□WAG-107H18  
ctg4165□ctg823□ctg673□WAG-121B5  
ctg4165□ctg896□□WAG-5D19  
ctg4165□ctg896□□WAG-48G3  
ctg4165□ctg896□□WAG-51I12  
ctg4165□ctg896□□WAG-52M15  
ctg4165□ctg896□□WAG-119H6  
ctg4165□ctg896□ctg977□WAG-9E21  
ctg4165□ctg896□ctg977□WAG-18H14  
ctg4165□ctg896□ctg977□WAG-20I17  
ctg4165□ctg896□ctg977□WAG-23G7  
ctg4165□ctg896□ctg977□WAG-66O21  
ctg4165□ctg896□ctg977□WAG-71K8  
ctg4165□ctg896□ctg977□WAG-76J10  
ctg4165□ctg896□ctg977□WAG-82J4  
ctg4165□ctg896□ctg977□WAG-83O11  
ctg4165□ctg896□ctg977□WAG-89M20  
ctg4165□ctg896□ctg977□WAG-101E13  
ctg4165□ctg896□ctg977□WAG-118K4  
ctg4166□□□WAG-3A2  
ctg4166□ctg2466□□WAG-2L1  
ctg4166□ctg2466□ctg2387□WAG-58N22  
ctg4166□ctg2466□ctg2387□WAG-60L23  
ctg4166□ctg2466□ctg2387□WAG-88C5  
ctg4166□ctg2466□ctg2387□WAG-120B11  
ctg4167□□□WAG-17E24  
ctg4167□□□WAG-20N23  
ctg4167□□□WAG-26N12  
ctg4167□□□WAG-50D2  
ctg4167□□□WAG-95B6  
ctg4167□□□WAG-95F9  
ctg4167□ctg1074□□WAG-80A12  
ctg4167□ctg1074□ctg1527□WAG-70N6  
ctg4167□ctg1074□ctg1527□WAG-101E14  
ctg4167□ctg1074□ctg1527□WAG-113M24  
ctg4167□ctg1074□ctg1527□WAG-114K7  
ctg4167□ctg1074□ctg1527□WAG-123H3  
ctg4167□ctg1074□ctg1527□WAG-124C20  
ctg4167□ctg1074□ctg4085□WAG-30D4  
ctg4167□ctg1074□ctg4085□WAG-30D6  
ctg4167□ctg1074□ctg4085□WAG-31I6

ctg4167□ctg4129□□WAG-46L8  
ctg4167□ctg4129□ctg5827□WAG-11B5  
ctg4167□ctg4129□ctg5827□WAG-78J14  
ctg4168□□□WAG-3M6  
ctg4168□□□WAG-59H19  
ctg4168□□□WAG-73C14  
ctg4168□□□WAG-94E15  
ctg4168□□□WAG-120D19  
ctg4168□ctg1311□□WAG-83L7  
ctg4168□ctg1311□ctg1480□WAG-7H4  
ctg4168□ctg1311□ctg1480□WAG-48H21  
ctg4168□ctg1311□ctg1480□WAG-49A5  
ctg4168□ctg1311□ctg1480□WAG-129A13  
ctg4168□ctg5403□ctg6398□WAG-78D10  
ctg4168□ctg5403□ctg6398□WAG-121A14  
ctg4169□□□WAG-47D10  
ctg4169□□□WAG-67P8  
ctg4169□ctg2012□□WAG-66M14  
ctg4169□ctg2012□ctg2138□WAG-3M7  
ctg4169□ctg2012□ctg2138□WAG-3M8  
ctg4169□ctg2012□ctg2138□WAG-57D22  
ctg4169□ctg2012□ctg2138□WAG-82P8  
ctg4169□ctg2012□ctg2138□WAG-119K20  
ctg4169□ctg2012□ctg3807□WAG-103I3  
ctg4169□ctg2012□ctg3807□WAG-118D17  
ctg417□□□WAG-98F4  
ctg417□ctg1178□□WAG-58M5  
ctg417□ctg1178□□WAG-129M10  
ctg417□ctg1178□ctg1276□WAG-29K3  
ctg417□ctg1178□ctg1276□WAG-32I8  
ctg417□ctg1178□ctg1276□WAG-52P2  
ctg417□ctg1178□ctg1276□WAG-60G7  
ctg417□ctg1178□ctg1276□WAG-79M23  
ctg417□ctg1178□ctg1276□WAG-88A11  
ctg417□ctg1178□ctg1276□WAG-124C17  
ctg4170□□□WAG-99I1  
ctg4170□□□WAG-104B8  
ctg4170□ctg1855□ctg2275□WAG-49C19  
ctg4170□ctg1855□ctg2275□WAG-62E1  
ctg4170□ctg1855□ctg2275□WAG-88F14  
ctg4170□ctg1855□ctg5320□WAG-50D20  
ctg4170□ctg1855□ctg5320□WAG-83D21  
ctg4170□ctg2997□□WAG-75P14  
ctg4170□ctg2997□ctg3999□WAG-7G15  
ctg4170□ctg2997□ctg3999□WAG-15K21  
ctg4170□ctg2997□ctg3999□WAG-97F18  
ctg4170□ctg2997□ctg4829□WAG-2B8  
ctg4170□ctg2997□ctg4829□WAG-18L5  
ctg4170□ctg6245□□WAG-59G11  
ctg4170□ctg6245□□WAG-88B1  
ctg4171□□□WAG-65G12  
ctg4171□□□WAG-71H10  
ctg4171□ctg1811□ctg2042□WAG-4E11  
ctg4171□ctg1811□ctg2042□WAG-69P7  
ctg4171□ctg1811□ctg2042□WAG-79C9  
ctg4171□ctg1811□ctg2042□WAG-87K2

ctg4171□ctg1811□ctg2042□WAG-96E14  
ctg4171□ctg1811□ctg2042□WAG-129F16  
ctg4171□ctg2478□ctg2398□WAG-21E7  
ctg4171□ctg2478□ctg2398□WAG-60H14  
ctg4171□ctg2478□ctg2398□WAG-102M7  
ctg4171□ctg3549□□WAG-24P15  
ctg4171□ctg3549□□WAG-121F8  
ctg4171□ctg3549□ctg4612□WAG-61E5  
ctg4171□ctg3549□ctg4612□WAG-114J21  
ctg4171□ctg5253□ctg6053□WAG-100E9  
ctg4171□ctg5253□ctg6053□WAG-100F9  
ctg4171□ctg5944□□WAG-50F15  
ctg4171□ctg5944□□WAG-60F12  
ctg4172□□□WAG-10P3  
ctg4172□ctg1095□□WAG-60H10  
ctg4172□ctg1095□ctg1273□WAG-19D21  
ctg4172□ctg1095□ctg1273□WAG-81E21  
ctg4172□ctg1095□ctg1273□WAG-85G8  
ctg4172□ctg1095□ctg1273□WAG-85M12  
ctg4172□ctg1095□ctg1273□WAG-130N11  
ctg4172□ctg4180□□WAG-9L16  
ctg4172□ctg4180□□WAG-85K6  
ctg4172□ctg4180□ctg6550□WAG-82B21  
ctg4172□ctg4180□ctg6550□WAG-96I2  
ctg4172□ctg4202□ctg4428□WAG-10M21  
ctg4172□ctg4202□ctg4428□WAG-90O7  
ctg4172□ctg5493□□WAG-45L6  
ctg4172□ctg5493□□WAG-93I22  
ctg4172□ctg5741□□WAG-32F5  
ctg4172□ctg5741□□WAG-49P4  
ctg4172□ctg766□□WAG-70J8  
ctg4172□ctg766□□WAG-75A21  
ctg4172□ctg766□□WAG-95L12  
ctg4172□ctg766□ctg1008□WAG-11E1  
ctg4172□ctg766□ctg1008□WAG-69H4  
ctg4172□ctg766□ctg1008□WAG-76J1  
ctg4172□ctg766□ctg1008□WAG-80M8  
ctg4172□ctg766□ctg1008□WAG-112C19  
ctg4172□ctg766□ctg3033□WAG-41A8  
ctg4172□ctg766□ctg3033□WAG-109B3  
ctg4172□ctg766□ctg3033□WAG-124F4  
ctg4173□ctg5649□□WAG-10D18  
ctg4173□ctg5649□□WAG-46K20  
ctg4174□□□WAG-99E23  
ctg4174□ctg5575□□WAG-46H24  
ctg4174□ctg5575□□WAG-51I5  
ctg4174□ctg937□□WAG-9B15  
ctg4174□ctg937□□WAG-9I9  
ctg4174□ctg937□□WAG-22E5  
ctg4174□ctg937□□WAG-34O13  
ctg4174□ctg937□□WAG-46J6  
ctg4174□ctg937□ctg2546□WAG-14I20  
ctg4174□ctg937□ctg2546□WAG-22A11  
ctg4174□ctg937□ctg2546□WAG-84K21  
ctg4174□ctg937□ctg2546□WAG-116A22  
ctg4174□ctg937□ctg4747□WAG-75H24

ctg4174□ctg937□ctg4747□WAG-96O4  
ctg4174□ctg937□ctg5544□WAG-98P8  
ctg4174□ctg937□ctg5544□WAG-99I3  
ctg4174□ctg937□ctg786□WAG-31N24  
ctg4174□ctg937□ctg786□WAG-50H3  
ctg4174□ctg937□ctg786□WAG-51K6  
ctg4174□ctg937□ctg786□WAG-69H22  
ctg4174□ctg937□ctg786□WAG-89F4  
ctg4174□ctg937□ctg786□WAG-100F22  
ctg4174□ctg937□ctg786□WAG-113F14  
ctg4174□ctg937□ctg786□WAG-123M24  
ctg4175□□□WAG-6F19  
ctg4175□□□WAG-29D4  
ctg4175□□□WAG-54M13  
ctg4175□ctg216□□WAG-14M21  
ctg4175□ctg216□□WAG-101E3  
ctg4175□ctg216□ctg309□WAG-2I16  
ctg4175□ctg216□ctg309□WAG-8O6  
ctg4175□ctg216□ctg309□WAG-12L6  
ctg4175□ctg216□ctg309□WAG-17C5  
ctg4175□ctg216□ctg309□WAG-17D5  
ctg4175□ctg216□ctg309□WAG-22G20  
ctg4175□ctg216□ctg309□WAG-29D6  
ctg4175□ctg216□ctg309□WAG-53N1  
ctg4175□ctg216□ctg309□WAG-56A11  
ctg4175□ctg216□ctg309□WAG-57M13  
ctg4175□ctg216□ctg309□WAG-57O11  
ctg4175□ctg216□ctg309□WAG-69D17  
ctg4175□ctg216□ctg309□WAG-81L13  
ctg4175□ctg216□ctg309□WAG-100O13  
ctg4175□ctg216□ctg309□WAG-101O7  
ctg4175□ctg216□ctg309□WAG-105C20  
ctg4175□ctg216□ctg309□WAG-111L23  
ctg4175□ctg216□ctg309□WAG-118P24  
ctg4175□ctg216□ctg309□WAG-120N6  
ctg4175□ctg3253□ctg5508□WAG-10L19  
ctg4175□ctg3253□ctg5508□WAG-69N7  
ctg4175□ctg3253□ctg5931□WAG-3C1  
ctg4175□ctg3253□ctg5931□WAG-43E9  
ctg4175□ctg5104□ctg5699□WAG-96N22  
ctg4175□ctg5104□ctg5699□WAG-129E6  
ctg4175□ctg675□□□WAG-125J4  
ctg4175□ctg675□ctg3323□WAG-17L7  
ctg4175□ctg675□ctg3323□WAG-18N1  
ctg4175□ctg675□ctg3323□WAG-26L15  
ctg4175□ctg675□ctg3674□WAG-16A16  
ctg4175□ctg675□ctg3674□WAG-46E17  
ctg4175□ctg675□ctg3674□WAG-56F9  
ctg4175□ctg675□ctg3674□WAG-65A7  
ctg4175□ctg675□ctg5516□WAG-29O20  
ctg4175□ctg675□ctg5516□WAG-110M9  
ctg4175□ctg675□ctg720□WAG-53C8  
ctg4175□ctg675□ctg720□WAG-54I2  
ctg4175□ctg675□ctg720□WAG-74H9  
ctg4175□ctg675□ctg720□WAG-77A19  
ctg4175□ctg675□ctg720□WAG-85I16

ctg4175□ctg675□ctg720□WAG-93G22  
ctg4175□ctg675□ctg720□WAG-94A20  
ctg4175□ctg675□ctg720□WAG-119M19  
ctg4176□□□WAG-12E15  
ctg4176□□□WAG-52E21  
ctg4176□□□WAG-75F24  
ctg4176□□□WAG-104P23  
ctg4176□□□WAG-113B2  
ctg4176□□□WAG-115J24  
ctg4176□□□WAG-122G23  
ctg4176□ctg1196□ctg1040□WAG-15P22  
ctg4176□ctg1196□ctg1040□WAG-22E10  
ctg4176□ctg1196□ctg1040□WAG-32O17  
ctg4176□ctg1196□ctg1040□WAG-50I5  
ctg4176□ctg1196□ctg1040□WAG-70A10  
ctg4176□ctg1196□ctg1040□WAG-91I5  
ctg4176□ctg1196□ctg1040□WAG-128E9  
ctg4176□ctg2195□□WAG-52K22  
ctg4176□ctg2195□□WAG-128C21  
ctg4176□ctg2195□ctg2781□WAG-9I4  
ctg4176□ctg2195□ctg2781□WAG-87H19  
ctg4176□ctg2195□ctg2781□WAG-103C13  
ctg4176□ctg2785□□WAG-12G20  
ctg4176□ctg2785□□WAG-29G9  
ctg4176□ctg2785□ctg3491□WAG-17K21  
ctg4176□ctg2785□ctg3491□WAG-71P21  
ctg4176□ctg2785□ctg3491□WAG-92K8  
ctg4176□ctg3962□□WAG-88J10  
ctg4176□ctg3962□□WAG-89L19  
ctg4176□ctg3962□ctg5431□WAG-49F5  
ctg4176□ctg3962□ctg5431□WAG-130J23  
ctg4176□ctg407□□WAG-124G19  
ctg4176□ctg407□ctg422□WAG-23L6  
ctg4176□ctg407□ctg422□WAG-42E7  
ctg4176□ctg407□ctg422□WAG-71C11  
ctg4176□ctg407□ctg422□WAG-92E18  
ctg4176□ctg407□ctg422□WAG-101E16  
ctg4176□ctg407□ctg422□WAG-111C15  
ctg4176□ctg407□ctg422□WAG-115L18  
ctg4176□ctg4919□ctg5260□WAG-21B4  
ctg4176□ctg4919□ctg5260□WAG-129L19  
ctg4176□ctg6125□□WAG-92O18  
ctg4176□ctg6125□□WAG-115P1  
ctg4177□□□WAG-38C16  
ctg4177□ctg1113□ctg1243□WAG-28F11  
ctg4177□ctg1113□ctg1243□WAG-67C15  
ctg4177□ctg1113□ctg1243□WAG-84J22  
ctg4177□ctg1113□ctg1243□WAG-98H15  
ctg4177□ctg1113□ctg1243□WAG-102A6  
ctg4177□ctg2700□ctg3268□WAG-26K1  
ctg4177□ctg2700□ctg3268□WAG-71B24  
ctg4177□ctg2700□ctg3268□WAG-76L6  
ctg4177□ctg2700□ctg3268□WAG-99J21  
ctg4177□ctg3530□ctg3671□WAG-27P15  
ctg4177□ctg3530□ctg3671□WAG-92N17  
ctg4177□ctg3530□ctg3671□WAG-96N8

ctg4177□ctg5069□ctg5609□WAG-81B11  
ctg4177□ctg5069□ctg5609□WAG-122N21  
ctg4177□ctg5556□ctg6701□WAG-41E1  
ctg4177□ctg5556□ctg6701□WAG-63H19  
ctg4178□□□WAG-113D18  
ctg4178□□□WAG-117C4  
ctg4178□ctg4147□□WAG-34J12  
ctg4178□ctg4147□□WAG-96O18  
ctg4178□ctg4147□ctg6375□WAG-41A21  
ctg4178□ctg4147□ctg6375□WAG-100L5  
ctg4178□ctg657□□WAG-88B7  
ctg4178□ctg657□ctg1108□WAG-49B22  
ctg4178□ctg657□ctg1108□WAG-86C14  
ctg4178□ctg657□ctg1108□WAG-113B14  
ctg4178□ctg657□ctg1108□WAG-119L12  
ctg4178□ctg657□ctg2480□WAG-29P10  
ctg4178□ctg657□ctg2480□WAG-73I1  
ctg4178□ctg657□ctg2480□WAG-76H18  
ctg4178□ctg657□ctg2480□WAG-78D11  
ctg4178□ctg657□ctg2480□WAG-95H18  
ctg4178□ctg657□ctg2480□WAG-99L19  
ctg4178□ctg657□ctg2480□WAG-108M10  
ctg4178□ctg657□ctg5422□WAG-21H14  
ctg4178□ctg657□ctg5422□WAG-23L22  
ctg4179□□□WAG-5L16  
ctg4179□□□WAG-15F20  
ctg4179□□□WAG-53C9  
ctg4179□□□WAG-78E24  
ctg4179□ctg1846□ctg2252□WAG-69C1  
ctg4179□ctg1846□ctg2252□WAG-86K10  
ctg4179□ctg1846□ctg2252□WAG-123C13  
ctg4179□ctg1846□ctg2252□WAG-129E20  
ctg4179□ctg2828□ctg2819□WAG-18D1  
ctg4179□ctg2828□ctg2819□WAG-83F21  
ctg4179□ctg2828□ctg2819□WAG-125P20  
ctg4179□ctg3537□ctg3680□WAG-11A12  
ctg4179□ctg3537□ctg3680□WAG-28L14  
ctg4179□ctg3537□ctg3680□WAG-48K14  
ctg4179□ctg4658□ctg4818□WAG-32O9  
ctg4179□ctg4658□ctg4818□WAG-103K4  
ctg4179□ctg5041□ctg5554□WAG-12E3  
ctg4179□ctg5041□ctg5554□WAG-57C12  
ctg4179□ctg856□□WAG-62O17  
ctg4179□ctg856□ctg4754□WAG-51L23  
ctg4179□ctg856□ctg4754□WAG-65P13  
ctg4179□ctg856□ctg924□WAG-5C7  
ctg4179□ctg856□ctg924□WAG-20H4  
ctg4179□ctg856□ctg924□WAG-41L24  
ctg4179□ctg856□ctg924□WAG-44G15  
ctg4179□ctg856□ctg924□WAG-71K11  
ctg4179□ctg856□ctg924□WAG-73G7  
ctg4179□ctg856□ctg924□WAG-81D21  
ctg4179□ctg856□ctg924□WAG-127B16  
ctg418□□□WAG-1B11  
ctg418□□□WAG-34K1  
ctg418□ctg1106□ctg2025□WAG-51L6

ctg418□ctg1106□ctg2025□WAG-56A14  
ctg418□ctg1106□ctg2025□WAG-74N21  
ctg418□ctg1106□ctg2025□WAG-81E7  
ctg418□ctg1106□ctg2025□WAG-91I7  
ctg418□ctg1106□ctg2025□WAG-100E16  
ctg418□ctg1106□ctg2025□WAG-118H6  
ctg418□ctg1106□ctg2025□WAG-118M1  
ctg418□ctg1106□ctg2025□WAG-119P12  
ctg418□ctg1106□ctg2025□WAG-126N21  
ctg418□ctg1106□ctg4473□WAG-56J22  
ctg418□ctg1106□ctg4473□WAG-87I15  
ctg418□ctg1106□ctg6672□WAG-75N16  
ctg418□ctg1106□ctg6672□WAG-127H4  
ctg418□ctg6184□□WAG-76K20  
ctg418□ctg6184□□WAG-125P5  
ctg4180□□□WAG-6N20  
ctg4180□□□WAG-45C17  
ctg4180□□□WAG-97A13  
ctg4180□□□WAG-99K19  
ctg4180□ctg3760□□WAG-18H6  
ctg4180□ctg3760□ctg5210□WAG-67B13  
ctg4180□ctg3760□ctg5210□WAG-121A21  
ctg4180□ctg3988□□WAG-102E13  
ctg4180□ctg3988□ctg5682□WAG-63C18  
ctg4180□ctg3988□ctg5682□WAG-69B1  
ctg4180□ctg5123□ctg5746□WAG-16I19  
ctg4180□ctg5123□ctg5746□WAG-96O14  
ctg4181□□□WAG-31A9  
ctg4181□□□WAG-46L21  
ctg4181□□□WAG-129P4  
ctg4181□ctg3573□□WAG-33B6  
ctg4181□ctg3573□□WAG-46F1  
ctg4181□ctg3573□□WAG-74I15  
ctg4181□ctg3573□□WAG-79O23  
ctg4181□ctg3722□□WAG-75K11  
ctg4181□ctg3722□□WAG-121N1  
ctg4181□ctg3722□ctg5044□WAG-19K22  
ctg4181□ctg3722□ctg5044□WAG-28C17  
ctg4181□ctg4327□□WAG-127E5  
ctg4181□ctg4327□ctg6369□WAG-62N18  
ctg4181□ctg4327□ctg6369□WAG-108L24  
ctg4181□ctg5641□□WAG-88L21  
ctg4181□ctg5641□□WAG-95H19  
ctg4181□ctg6364□□WAG-10A3  
ctg4181□ctg6364□□WAG-30D24  
ctg4182□□□WAG-11E23  
ctg4182□□□WAG-17I1  
ctg4182□ctg1111□ctg1242□WAG-26L19  
ctg4182□ctg1111□ctg1242□WAG-51H16  
ctg4182□ctg1111□ctg1242□WAG-100F3  
ctg4182□ctg1111□ctg1242□WAG-108M6  
ctg4182□ctg1111□ctg1242□WAG-125G7  
ctg4182□ctg2888□ctg2879□WAG-19F20  
ctg4182□ctg2888□ctg2879□WAG-90G21  
ctg4182□ctg2888□ctg2879□WAG-97K24  
ctg4182□ctg2888□ctg2879□WAG-129K1



ctg4182□ctg4229□□WAG-53O7  
ctg4182□ctg4229□ctg6681□WAG-103D7  
ctg4182□ctg4229□ctg6681□WAG-123I22  
ctg4182□ctg951□□WAG-3F19  
ctg4182□ctg951□ctg1043□WAG-40C24  
ctg4182□ctg951□ctg1043□WAG-93E12  
ctg4182□ctg951□ctg1043□WAG-109G18  
ctg4182□ctg951□ctg1043□WAG-130P11  
ctg4183□ctg1791□□WAG-15J7  
ctg4183□ctg1791□□WAG-17D19  
ctg4183□ctg1791□□WAG-41B17  
ctg4183□ctg1791□ctg2099□WAG-65L20  
ctg4183□ctg1791□ctg2099□WAG-76J2  
ctg4183□ctg1791□ctg2099□WAG-105A21  
ctg4183□ctg1791□ctg2797□WAG-37M17  
ctg4183□ctg1791□ctg2797□WAG-45B5  
ctg4183□ctg1791□ctg2797□WAG-60P20  
ctg4183□ctg844□ctg719□WAG-15G20  
ctg4183□ctg844□ctg719□WAG-23K19  
ctg4183□ctg844□ctg719□WAG-41E22  
ctg4183□ctg844□ctg719□WAG-83H2  
ctg4183□ctg844□ctg719□WAG-114F21  
ctg4183□ctg844□ctg719□WAG-117O12  
ctg4183□ctg844□ctg719□WAG-120A2  
ctg4184□□□WAG-35A6  
ctg4184□□□WAG-86K3  
ctg4184□ctg2310□□WAG-58A6  
ctg4184□ctg2310□□WAG-100G15  
ctg4184□ctg2310□□WAG-103F20  
ctg4184□ctg2310□ctg2916□WAG-27H8  
ctg4184□ctg2310□ctg2916□WAG-54G10  
ctg4184□ctg2310□ctg2916□WAG-123G15  
ctg4184□ctg2782□□WAG-35I4  
ctg4184□ctg2782□ctg3767□WAG-77H18  
ctg4184□ctg2782□ctg3767□WAG-86M8  
ctg4184□ctg3009□□WAG-85K23  
ctg4184□ctg3009□ctg3485□WAG-75C13  
ctg4184□ctg3009□ctg3485□WAG-116N16  
ctg4184□ctg3009□ctg3485□WAG-117E19  
ctg4185□□□WAG-59M12  
ctg4185□□□WAG-120J22  
ctg4185□ctg111□□WAG-3A22  
ctg4185□ctg111□□WAG-98F11  
ctg4185□ctg111□ctg142□WAG-12K8  
ctg4185□ctg111□ctg142□WAG-20D18  
ctg4185□ctg111□ctg142□WAG-51L21  
ctg4185□ctg111□ctg142□WAG-55D4  
ctg4185□ctg111□ctg142□WAG-55L16  
ctg4185□ctg111□ctg142□WAG-63M5  
ctg4185□ctg111□ctg142□WAG-65H12  
ctg4185□ctg111□ctg142□WAG-78A3  
ctg4185□ctg111□ctg142□WAG-81F2  
ctg4185□ctg111□ctg142□WAG-89H20  
ctg4185□ctg111□ctg142□WAG-94C20  
ctg4185□ctg111□ctg142□WAG-109K14  
ctg4185□ctg111□ctg142□WAG-120E16

ctg4185□ctg470□□WAG-41K24  
ctg4185□ctg470□ctg448□WAG-9I18  
ctg4185□ctg470□ctg448□WAG-48F18  
ctg4185□ctg470□ctg448□WAG-57P21  
ctg4185□ctg470□ctg448□WAG-60F8  
ctg4185□ctg470□ctg448□WAG-63H23  
ctg4185□ctg470□ctg448□WAG-71H20  
ctg4185□ctg470□ctg448□WAG-76N9  
ctg4185□ctg470□ctg448□WAG-81B21  
ctg4185□ctg470□ctg448□WAG-85N11  
ctg4185□ctg470□ctg448□WAG-96L7  
ctg4185□ctg6504□□WAG-5F10  
ctg4185□ctg6504□□WAG-6G19  
ctg4185□ctg754□□WAG-29B9  
ctg4185□ctg754□ctg4522□WAG-28J24  
ctg4185□ctg754□ctg4522□WAG-84M10  
ctg4185□ctg754□ctg868□WAG-21M8  
ctg4185□ctg754□ctg868□WAG-61A15  
ctg4185□ctg754□ctg868□WAG-71F11  
ctg4185□ctg754□ctg868□WAG-88A10  
ctg4185□ctg754□ctg868□WAG-89E20  
ctg4185□ctg754□ctg868□WAG-97O7  
ctg4185□ctg754□ctg868□WAG-106N16  
ctg4185□ctg754□ctg868□WAG-123N9  
ctg4185□ctg754□ctg868□WAG-128F9  
ctg4185□ctg754□ctg868□WAG-129K19  
ctg4186□□□WAG-4H16  
ctg4186□□□WAG-18C20  
ctg4186□□□WAG-76E5  
ctg4186□□□WAG-88J11  
ctg4186□ctg5849□□WAG-96F21  
ctg4186□ctg5849□□WAG-119I6  
ctg4187□□□WAG-15B5  
ctg4187□□□WAG-101H9  
ctg4187□□□WAG-104D7  
ctg4187□□□WAG-113K18  
ctg4187□□□WAG-116E7  
ctg4187□ctg1458□□WAG-25H15  
ctg4187□ctg1458□□WAG-67J7  
ctg4187□ctg1458□ctg1644□WAG-13C20  
ctg4187□ctg1458□ctg1644□WAG-41J1  
ctg4187□ctg1458□ctg1644□WAG-48L4  
ctg4187□ctg1458□ctg1644□WAG-109J4  
ctg4187□ctg1458□ctg1644□WAG-119C13  
ctg4187□ctg1458□ctg3935□WAG-13C16  
ctg4187□ctg1458□ctg3935□WAG-43F22  
ctg4187□ctg1458□ctg3935□WAG-100F20  
ctg4187□ctg3400□□WAG-13G12  
ctg4187□ctg3400□□WAG-99I8  
ctg4187□ctg3400□□WAG-121B13  
ctg4187□ctg3400□□WAG-126P23  
ctg4188□□□WAG-77C1  
ctg4188□□□WAG-85K5  
ctg4188□ctg3832□□WAG-117H19  
ctg4188□ctg3832□ctg4857□WAG-29J2  
ctg4188□ctg3832□ctg4857□WAG-92N12

ctg4188□ctg4341□ctg4527□WAG-49A7  
ctg4188□ctg4341□ctg4527□WAG-53C23  
ctg4188□ctg5576□□WAG-45B18  
ctg4188□ctg5576□□WAG-87B11  
ctg4189□□□WAG-40B20  
ctg4189□□□WAG-100G24  
ctg419□ctg1064□ctg905□WAG-24A13  
ctg419□ctg1064□ctg905□WAG-28E2  
ctg419□ctg1064□ctg905□WAG-33E19  
ctg419□ctg1064□ctg905□WAG-36F5  
ctg419□ctg1064□ctg905□WAG-41J16  
ctg419□ctg1064□ctg905□WAG-67O6  
ctg419□ctg1064□ctg905□WAG-87I20  
ctg419□ctg1064□ctg905□WAG-112G24  
ctg4190□□□WAG-13C21  
ctg4190□ctg2519□□WAG-15A8  
ctg4190□ctg2519□□WAG-45F17  
ctg4190□ctg2519□□WAG-106A3  
ctg4190□ctg2519□ctg4270□WAG-37E3  
ctg4190□ctg2519□ctg4270□WAG-118D21  
ctg4190□ctg2519□ctg4270□WAG-127M8  
ctg4190□ctg4012□□WAG-25P7  
ctg4190□ctg4012□ctg5269□WAG-24G17  
ctg4190□ctg4012□ctg5269□WAG-129A19  
ctg4190□ctg6436□□WAG-58I3  
ctg4190□ctg6436□□WAG-120A1  
ctg4191□□□WAG-93M9  
ctg4191□ctg606□□WAG-68H9  
ctg4191□ctg606□□WAG-81D1  
ctg4191□ctg606□□WAG-106M10  
ctg4191□ctg606□ctg505□WAG-51A13  
ctg4191□ctg606□ctg505□WAG-62J8  
ctg4191□ctg606□ctg505□WAG-73O4  
ctg4191□ctg606□ctg505□WAG-80J8  
ctg4191□ctg606□ctg505□WAG-85J10  
ctg4191□ctg606□ctg505□WAG-96G11  
ctg4191□ctg606□ctg505□WAG-110D16  
ctg4191□ctg606□ctg505□WAG-129B20  
ctg4191□ctg6339□□WAG-97P22  
ctg4191□ctg6339□□WAG-128K3  
ctg4192□□□WAG-79E5  
ctg4192□ctg5963□□WAG-84A18  
ctg4192□ctg5963□□WAG-105K17  
ctg4192□ctg6495□□WAG-12E21  
ctg4192□ctg6495□□WAG-32J1  
ctg4193□□□WAG-5K22  
ctg4193□□□WAG-9F4  
ctg4193□□□WAG-102K19  
ctg4193□□□WAG-117A4  
ctg4193□ctg480□□WAG-5A2  
ctg4193□ctg480□□WAG-12L21  
ctg4193□ctg480□□WAG-38B10  
ctg4193□ctg480□ctg3665□WAG-77A12  
ctg4193□ctg480□ctg3665□WAG-130D21  
ctg4193□ctg480□ctg4772□WAG-11N5  
ctg4193□ctg480□ctg4772□WAG-59G14

ctg4193□ctg480□ctg5007□WAG-73N4  
ctg4193□ctg480□ctg5007□WAG-115I16  
ctg4193□ctg480□ctg664□WAG-31G10  
ctg4193□ctg480□ctg664□WAG-32E19  
ctg4193□ctg480□ctg664□WAG-32F17  
ctg4193□ctg480□ctg664□WAG-43O4  
ctg4193□ctg480□ctg664□WAG-75N19  
ctg4193□ctg480□ctg664□WAG-80I1  
ctg4193□ctg480□ctg664□WAG-85C24  
ctg4193□ctg480□ctg664□WAG-97N21  
ctg4193□ctg480□ctg664□WAG-101C11  
ctg4193□ctg480□ctg664□WAG-103A17  
ctg4194□□□WAG-34G20  
ctg4194□□□WAG-36N11  
ctg4194□□□WAG-41P3  
ctg4194□□□WAG-90F8  
ctg4194□□□WAG-99C8  
ctg4194□ctg273□□WAG-4O6  
ctg4194□ctg273□ctg225□WAG-16F18  
ctg4194□ctg273□ctg225□WAG-23D8  
ctg4194□ctg273□ctg225□WAG-27F18  
ctg4194□ctg273□ctg225□WAG-44K21  
ctg4194□ctg273□ctg225□WAG-47K13  
ctg4194□ctg273□ctg225□WAG-66L20  
ctg4194□ctg273□ctg225□WAG-116I17  
ctg4194□ctg273□ctg225□WAG-129P5  
ctg4194□ctg5784□ctg6907□WAG-20O6  
ctg4194□ctg5784□ctg6907□WAG-54A4  
ctg4194□ctg6418□□WAG-54F21  
ctg4194□ctg6418□□WAG-118D9  
ctg4195□ctg5720□ctg6870□WAG-52L13  
ctg4195□ctg5720□ctg6870□WAG-124B20  
ctg4196□ctg4378□□WAG-61N20  
ctg4196□ctg4378□ctg4548□WAG-94I17  
ctg4196□ctg4378□ctg4548□WAG-124F13  
ctg4196□ctg5574□□WAG-68D22  
ctg4196□ctg5574□□WAG-117N18  
ctg4197□ctg1385□ctg1227□WAG-8B24  
ctg4197□ctg1385□ctg1227□WAG-58C21  
ctg4197□ctg1385□ctg1227□WAG-66J13  
ctg4197□ctg1385□ctg1227□WAG-112K4  
ctg4197□ctg5539□□WAG-43D15  
ctg4197□ctg5539□□WAG-68D2  
ctg4198□ctg222□□WAG-33N6  
ctg4198□ctg222□□WAG-99O20  
ctg4198□ctg222□ctg1158□WAG-33N18  
ctg4198□ctg222□ctg1158□WAG-40M3  
ctg4198□ctg222□ctg1158□WAG-49C9  
ctg4198□ctg222□ctg1158□WAG-50E7  
ctg4198□ctg222□ctg1158□WAG-54K9  
ctg4198□ctg222□ctg1158□WAG-58E16  
ctg4198□ctg222□ctg1158□WAG-67H8  
ctg4198□ctg222□ctg1158□WAG-88D7  
ctg4198□ctg222□ctg1158□WAG-88M11  
ctg4198□ctg222□ctg1158□WAG-93G14  
ctg4198□ctg222□ctg1158□WAG-105M16

ctg4198□ctg222□ctg1158□WAG-107D20  
ctg4198□ctg222□ctg1158□WAG-112G4  
ctg4198□ctg222□ctg1158□WAG-114A13  
ctg4198□ctg222□ctg182□WAG-13E11  
ctg4198□ctg222□ctg182□WAG-15C18  
ctg4198□ctg222□ctg182□WAG-21F23  
ctg4198□ctg222□ctg182□WAG-22H2  
ctg4198□ctg222□ctg182□WAG-28C1  
ctg4198□ctg222□ctg182□WAG-30G1  
ctg4198□ctg222□ctg182□WAG-37M3  
ctg4198□ctg222□ctg182□WAG-43G17  
ctg4198□ctg222□ctg182□WAG-58N4  
ctg4198□ctg222□ctg182□WAG-75P22  
ctg4198□ctg222□ctg182□WAG-92E2  
ctg4198□ctg222□ctg182□WAG-105A10  
ctg4198□ctg222□ctg182□WAG-109M8  
ctg4198□ctg222□ctg182□WAG-112I10  
ctg4199□□□WAG-128H20  
ctg4199□ctg1215□□WAG-5G20  
ctg4199□ctg1215□□WAG-8F8  
ctg4199□ctg1215□□WAG-16K21  
ctg4199□ctg1215□ctg1355□WAG-18L10  
ctg4199□ctg1215□ctg1355□WAG-43P10  
ctg4199□ctg1215□ctg1355□WAG-45H24  
ctg4199□ctg1215□ctg1355□WAG-83E14  
ctg4199□ctg1215□ctg1355□WAG-86C9  
ctg4199□ctg1215□ctg1355□WAG-102M20  
ctg4199□ctg1215□ctg1355□WAG-107N14  
ctg4199□ctg1215□ctg1355□WAG-123G16  
ctg4199□ctg6152□□WAG-27K15  
ctg4199□ctg6152□□WAG-45E6  
ctg42□ctg229□ctg319□WAG-3I2  
ctg42□ctg229□ctg319□WAG-6J22  
ctg42□ctg229□ctg319□WAG-27B23  
ctg42□ctg229□ctg319□WAG-37E20  
ctg42□ctg229□ctg319□WAG-46E5  
ctg42□ctg229□ctg319□WAG-64J10  
ctg42□ctg229□ctg319□WAG-67A22  
ctg42□ctg229□ctg319□WAG-94J15  
ctg42□ctg229□ctg319□WAG-119G9  
ctg420□□□WAG-130L22  
ctg420□ctg1155□□WAG-30N19  
ctg420□ctg1155□ctg1288□WAG-11D6  
ctg420□ctg1155□ctg1288□WAG-17G7  
ctg420□ctg1155□ctg1288□WAG-32P6  
ctg420□ctg1155□ctg1288□WAG-40K13  
ctg420□ctg1155□ctg1288□WAG-50E22  
ctg420□ctg1155□ctg1288□WAG-102H7  
ctg420□ctg1155□ctg6454□WAG-107M7  
ctg420□ctg1155□ctg6454□WAG-121D5  
ctg420□ctg1155□ctg6531□WAG-117E6  
ctg420□ctg1155□ctg6531□WAG-118N17  
ctg4200□ctg2833□□WAG-64D24  
ctg4200□ctg2833□ctg3658□WAG-13K19  
ctg4200□ctg2833□ctg3658□WAG-96L22  
ctg4200□ctg2833□ctg3658□WAG-110I1

ctg4200□ctg2833□ctg3658□WAG-120G8  
ctg4200□ctg2833□ctg4113□WAG-16I20  
ctg4200□ctg2833□ctg4113□WAG-51C8  
ctg4200□ctg2833□ctg4113□WAG-129C12  
ctg4200□ctg5183□ctg5887□WAG-74L1  
ctg4200□ctg5183□ctg5887□WAG-114I21  
ctg4201□ctg5057□ctg5585□WAG-66E1  
ctg4201□ctg5057□ctg5585□WAG-108B22  
ctg4202□□□WAG-66N21  
ctg4202□ctg29□ctg31□WAG-9G7  
ctg4202□ctg29□ctg31□WAG-15C4  
ctg4202□ctg29□ctg31□WAG-16A8  
ctg4202□ctg29□ctg31□WAG-23A8  
ctg4202□ctg29□ctg31□WAG-28J5  
ctg4202□ctg29□ctg31□WAG-34G22  
ctg4202□ctg29□ctg31□WAG-40I2  
ctg4202□ctg29□ctg31□WAG-58F21  
ctg4202□ctg29□ctg31□WAG-62O15  
ctg4202□ctg29□ctg31□WAG-65P10  
ctg4202□ctg29□ctg31□WAG-93A1  
ctg4202□ctg29□ctg31□WAG-104C24  
ctg4202□ctg29□ctg31□WAG-109H14  
ctg4202□ctg29□ctg31□WAG-117P2  
ctg4202□ctg29□ctg31□WAG-119N23  
ctg4202□ctg29□ctg31□WAG-124P7  
ctg4202□ctg29□ctg4130□WAG-53F15  
ctg4202□ctg29□ctg4130□WAG-106M7  
ctg4202□ctg29□ctg4130□WAG-127L12  
ctg4202□ctg4817□ctg5082□WAG-129L3  
ctg4202□ctg4817□ctg5082□WAG-130C7  
ctg4202□ctg6322□□WAG-4G10  
ctg4202□ctg6322□□WAG-14I14  
ctg4203□□□WAG-113L11  
ctg4203□ctg3033□□WAG-50O3  
ctg4203□ctg3033□ctg4140□WAG-51L17  
ctg4203□ctg3033□ctg4140□WAG-51N17  
ctg4203□ctg4708□□WAG-6J16  
ctg4203□ctg4708□□WAG-77P17  
ctg4203□ctg4708□□WAG-81A22  
ctg4204□□□WAG-5H16  
ctg4204□□□WAG-12B8  
ctg4204□□□WAG-41N1  
ctg4204□□□WAG-77M2  
ctg4204□ctg1027□□WAG-51I3  
ctg4204□ctg1027□ctg1134□WAG-3L5  
ctg4204□ctg1027□ctg1134□WAG-17P11  
ctg4204□ctg1027□ctg1134□WAG-22G13  
ctg4204□ctg1027□ctg1134□WAG-101B19  
ctg4204□ctg1027□ctg1134□WAG-105N6  
ctg4204□ctg1027□ctg1134□WAG-125F8  
ctg4204□ctg398□□WAG-22B13  
ctg4204□ctg398□□WAG-29I24  
ctg4204□ctg398□□WAG-77J24  
ctg4204□ctg398□ctg395□WAG-28H17  
ctg4204□ctg398□ctg395□WAG-50P8  
ctg4204□ctg398□ctg395□WAG-60I4

ctg4204□ctg398□ctg395□WAG-85M11  
ctg4204□ctg398□ctg395□WAG-110H14  
ctg4204□ctg398□ctg395□WAG-118D24  
ctg4204□ctg398□ctg395□WAG-123I8  
ctg4204□ctg4399□□WAG-101K17  
ctg4204□ctg4399□ctg6598□WAG-77L11  
ctg4204□ctg4399□ctg6598□WAG-117A23  
ctg4204□ctg4906□ctg5235□WAG-94P12  
ctg4204□ctg4906□ctg5235□WAG-122K18  
ctg4204□ctg4935□ctg5294□WAG-28B15  
ctg4204□ctg4935□ctg5294□WAG-69L10  
ctg4204□ctg5691□□WAG-83K11  
ctg4204□ctg5691□□WAG-125O13  
ctg4204□ctg5844□□WAG-60A6  
ctg4204□ctg5844□□WAG-119N2  
ctg4204□ctg814□ctg830□WAG-3H6  
ctg4204□ctg814□ctg830□WAG-6B20  
ctg4204□ctg814□ctg830□WAG-41J13  
ctg4204□ctg814□ctg830□WAG-44M20  
ctg4204□ctg814□ctg830□WAG-68H8  
ctg4204□ctg814□ctg830□WAG-71N9  
ctg4204□ctg814□ctg830□WAG-95H24  
ctg4204□ctg814□ctg830□WAG-103L18  
ctg4204□ctg814□ctg830□WAG-130P24  
ctg4205□□□WAG-14G1  
ctg4205□ctg4272□ctg4468□WAG-10O5  
ctg4205□ctg4272□ctg4468□WAG-92F10  
ctg4206□□□WAG-1O5  
ctg4206□□□WAG-114J13  
ctg4206□□□WAG-119F23  
ctg4206□ctg214□ctg2715□WAG-2C22  
ctg4206□ctg214□ctg2715□WAG-43F14  
ctg4206□ctg214□ctg2715□WAG-105H23  
ctg4206□ctg214□ctg2715□WAG-110I6  
ctg4206□ctg214□ctg3449□WAG-64P11  
ctg4206□ctg214□ctg3449□WAG-66O3  
ctg4206□ctg214□ctg3449□WAG-75L17  
ctg4206□ctg214□ctg514□WAG-8D19  
ctg4206□ctg214□ctg514□WAG-23D16  
ctg4206□ctg214□ctg514□WAG-42G5  
ctg4206□ctg214□ctg514□WAG-62I15  
ctg4206□ctg214□ctg514□WAG-63D16  
ctg4206□ctg214□ctg514□WAG-65J24  
ctg4206□ctg214□ctg514□WAG-83G21  
ctg4206□ctg214□ctg514□WAG-87M3  
ctg4206□ctg214□ctg514□WAG-107P18  
ctg4206□ctg4122□ctg4382□WAG-44G7  
ctg4206□ctg4122□ctg4382□WAG-63J10  
ctg4206□ctg87□ctg4274□WAG-57B4  
ctg4206□ctg87□ctg4274□WAG-101F11  
ctg4206□ctg87□ctg4274□WAG-120H13  
ctg4206□ctg87□ctg4337□WAG-16D4  
ctg4206□ctg87□ctg4337□WAG-40H21  
ctg4206□ctg87□ctg4337□WAG-128J21  
ctg4206□ctg87□ctg63□WAG-8F14  
ctg4206□ctg87□ctg63□WAG-8N8

ctg4206□ctg87□ctg63□WAG-12M8  
ctg4206□ctg87□ctg63□WAG-15P10  
ctg4206□ctg87□ctg63□WAG-61M12  
ctg4206□ctg87□ctg63□WAG-81A17  
ctg4206□ctg87□ctg63□WAG-85J17  
ctg4206□ctg87□ctg63□WAG-96H20  
ctg4206□ctg87□ctg63□WAG-98H20  
ctg4206□ctg87□ctg63□WAG-102E5  
ctg4206□ctg87□ctg63□WAG-103A4  
ctg4206□ctg87□ctg63□WAG-126F16  
ctg4207□□□WAG-10C10  
ctg4207□□□WAG-120A11  
ctg4207□ctg4049□□WAG-117G13  
ctg4207□ctg4049□ctg5957□WAG-15H4  
ctg4207□ctg4049□ctg5957□WAG-102I2  
ctg4208□□□WAG-52L4  
ctg4208□□□WAG-76J6  
ctg4208□ctg3797□□WAG-116L1  
ctg4208□ctg3797□ctg5034□WAG-79A11  
ctg4208□ctg3797□ctg5034□WAG-110A22  
ctg4208□ctg3797□ctg6456□WAG-76H23  
ctg4208□ctg3797□ctg6456□WAG-97L10  
ctg4208□ctg4794□ctg5029□WAG-30O6  
ctg4208□ctg4794□ctg5029□WAG-106E20  
ctg4209□□□WAG-32L17  
ctg4209□□□WAG-35G24  
ctg4209□□□WAG-58B1  
ctg4209□□□WAG-123D15  
ctg4209□ctg1699□ctg1546□WAG-10F12  
ctg4209□ctg1699□ctg1546□WAG-24E1  
ctg4209□ctg1699□ctg1546□WAG-33N23  
ctg4209□ctg1699□ctg1546□WAG-40C3  
ctg4209□ctg1699□ctg1546□WAG-80J12  
ctg4209□ctg1699□ctg1546□WAG-81E10  
ctg4209□ctg3255□ctg3298□WAG-40H7  
ctg4209□ctg3255□ctg3298□WAG-83O15  
ctg4209□ctg3255□ctg3298□WAG-114B10  
ctg4209□ctg3450□ctg3561□WAG-46J4  
ctg4209□ctg3450□ctg3561□WAG-99O11  
ctg4209□ctg3450□ctg3561□WAG-127C12  
ctg4209□ctg6209□□WAG-16H8  
ctg4209□ctg6209□□WAG-28P10  
ctg421□□□WAG-69P3  
ctg421□ctg1012□□WAG-68O17  
ctg421□ctg1012□□WAG-123I9  
ctg421□ctg1012□ctg1290□WAG-74O19  
ctg421□ctg1012□ctg1290□WAG-79C11  
ctg421□ctg1012□ctg1290□WAG-110N23  
ctg421□ctg1012□ctg1290□WAG-111N14  
ctg421□ctg1012□ctg1290□WAG-116D16  
ctg4210□□□WAG-15J10  
ctg4210□ctg148□ctg201□WAG-20F13  
ctg4210□ctg148□ctg201□WAG-20N20  
ctg4210□ctg148□ctg201□WAG-21A15  
ctg4210□ctg148□ctg201□WAG-74G19  
ctg4210□ctg148□ctg201□WAG-109M2



ctg4210□ctg148□ctg201□WAG-113F8  
ctg4210□ctg148□ctg201□WAG-115M3  
ctg4210□ctg148□ctg201□WAG-123J8  
ctg4210□ctg148□ctg201□WAG-126C1  
ctg4210□ctg148□ctg288□WAG-15A5  
ctg4210□ctg148□ctg288□WAG-23J8  
ctg4210□ctg148□ctg288□WAG-29J6  
ctg4210□ctg148□ctg288□WAG-30L10  
ctg4210□ctg148□ctg288□WAG-33H1  
ctg4210□ctg148□ctg288□WAG-33L10  
ctg4210□ctg148□ctg288□WAG-36C24  
ctg4210□ctg148□ctg288□WAG-57G17  
ctg4210□ctg148□ctg288□WAG-57M17  
ctg4210□ctg148□ctg288□WAG-69O20  
ctg4210□ctg148□ctg288□WAG-77G24  
ctg4210□ctg148□ctg288□WAG-92L22  
ctg4210□ctg148□ctg288□WAG-103J4  
ctg4210□ctg148□ctg288□WAG-116P1  
ctg4210□ctg148□ctg288□WAG-126L9  
ctg4211□□□WAG-40F20  
ctg4211□ctg3014□□WAG-73F16  
ctg4211□ctg3014□ctg4111□WAG-11H18  
ctg4211□ctg3014□ctg4111□WAG-44C20  
ctg4211□ctg3014□ctg4111□WAG-74G11  
ctg4211□ctg35□□WAG-3H7  
ctg4211□ctg35□ctg39□WAG-2F8  
ctg4211□ctg35□ctg39□WAG-6I17  
ctg4211□ctg35□ctg39□WAG-23I17  
ctg4211□ctg35□ctg39□WAG-26C16  
ctg4211□ctg35□ctg39□WAG-49C18  
ctg4211□ctg35□ctg39□WAG-59M1  
ctg4211□ctg35□ctg39□WAG-60B13  
ctg4211□ctg35□ctg39□WAG-69D18  
ctg4211□ctg35□ctg39□WAG-74C14  
ctg4211□ctg35□ctg39□WAG-76F4  
ctg4211□ctg35□ctg39□WAG-83B21  
ctg4211□ctg35□ctg39□WAG-91G1  
ctg4211□ctg35□ctg39□WAG-92I7  
ctg4211□ctg35□ctg39□WAG-99I15  
ctg4211□ctg35□ctg39□WAG-107L8  
ctg4211□ctg35□ctg39□WAG-109C9  
ctg4211□ctg35□ctg39□WAG-114L7  
ctg4211□ctg35□ctg39□WAG-130P21  
ctg4211□ctg374□□WAG-15K13  
ctg4211□ctg374□□WAG-89B7  
ctg4211□ctg374□□WAG-96M21  
ctg4211□ctg374□□WAG-122A24  
ctg4211□ctg374□□WAG-126E8  
ctg4211□ctg374□ctg1787□WAG-26J13  
ctg4211□ctg374□ctg1787□WAG-86F3  
ctg4211□ctg374□ctg1787□WAG-94J6  
ctg4211□ctg374□ctg1787□WAG-104J22  
ctg4211□ctg374□ctg278□WAG-57E12  
ctg4211□ctg374□ctg278□WAG-67J11  
ctg4211□ctg374□ctg278□WAG-73A5  
ctg4211□ctg374□ctg278□WAG-75I20

ctg4211□ctg374□ctg278□WAG-85N22  
ctg4211□ctg374□ctg278□WAG-87G15  
ctg4211□ctg374□ctg278□WAG-119E23  
ctg4212□□□WAG-26H11  
ctg4212□□□WAG-50D10  
ctg4212□□□WAG-124K24  
ctg4212□ctg2144□□WAG-56P7  
ctg4212□ctg2144□□WAG-84M6  
ctg4212□ctg2144□ctg2726□WAG-10P8  
ctg4212□ctg2144□ctg2726□WAG-61P21  
ctg4212□ctg2144□ctg2726□WAG-124H10  
ctg4212□ctg2174□□WAG-37N23  
ctg4212□ctg2174□□WAG-61H5  
ctg4212□ctg2174□ctg2050□WAG-2P8  
ctg4212□ctg2174□ctg2050□WAG-15E2  
ctg4212□ctg2174□ctg2050□WAG-42D8  
ctg4212□ctg2174□ctg2050□WAG-61G5  
ctg4212□ctg2174□ctg2050□WAG-85O9  
ctg4212□ctg2174□ctg2050□WAG-123K18  
ctg4212□ctg4210□□WAG-31J5  
ctg4212□ctg4210□□WAG-63H15  
ctg4212□ctg4210□ctg6361□WAG-46P7  
ctg4212□ctg4210□ctg6361□WAG-122P1  
ctg4212□ctg5401□ctg6394□WAG-37I1  
ctg4212□ctg5401□ctg6394□WAG-83K2  
ctg4213□□□WAG-74A21  
ctg4213□□□WAG-93E9  
ctg4213□□□WAG-110B6  
ctg4213□ctg3654□□WAG-6F18  
ctg4213□ctg3654□□WAG-123N10  
ctg4213□ctg3654□ctg5317□WAG-11D1  
ctg4213□ctg3654□ctg5317□WAG-122C2  
ctg4214□□□WAG-93E6  
ctg4214□□□WAG-98M18  
ctg4214□ctg1789□□WAG-28C8  
ctg4214□ctg1789□□WAG-57G16  
ctg4214□ctg1789□ctg1696□WAG-10J11  
ctg4214□ctg1789□ctg1696□WAG-15K3  
ctg4214□ctg1789□ctg1696□WAG-45H16  
ctg4214□ctg1789□ctg1696□WAG-64N20  
ctg4214□ctg1789□ctg1696□WAG-81N10  
ctg4214□ctg1789□ctg1696□WAG-96O10  
ctg4214□ctg1789□ctg1696□WAG-103F21  
ctg4214□ctg1789□ctg1696□WAG-105M9  
ctg4214□ctg1789□ctg6934□WAG-59L11  
ctg4214□ctg1789□ctg6934□WAG-118H16  
ctg4215□□□WAG-45L2  
ctg4215□□□WAG-108A13  
ctg4215□ctg1376□ctg1216□WAG-15D18  
ctg4215□ctg1376□ctg1216□WAG-97D19  
ctg4215□ctg1376□ctg1216□WAG-100C19  
ctg4215□ctg1376□ctg1216□WAG-103O7  
ctg4215□ctg1376□ctg1216□WAG-117K9  
ctg4215□ctg4259□□WAG-43N23  
ctg4215□ctg4259□ctg6704□WAG-57C18  
ctg4215□ctg4259□ctg6704□WAG-59P1

ctg4216□□□WAG-17D14  
ctg4216□□□WAG-29O14  
ctg4216□□□WAG-38C4  
ctg4216□□□WAG-76P8  
ctg4216□□□WAG-111D14  
ctg4216□ctg309□□WAG-72P24  
ctg4216□ctg309□ctg293□WAG-12O18  
ctg4216□ctg309□ctg293□WAG-29C3  
ctg4216□ctg309□ctg293□WAG-40K10  
ctg4216□ctg309□ctg293□WAG-70I11  
ctg4216□ctg309□ctg293□WAG-76N6  
ctg4216□ctg309□ctg293□WAG-124E15  
ctg4216□ctg309□ctg3966□WAG-63H3  
ctg4216□ctg309□ctg3966□WAG-89D9  
ctg4216□ctg309□ctg3966□WAG-116O13  
ctg4216□ctg416□□WAG-106G14  
ctg4216□ctg416□ctg327□WAG-18J4  
ctg4216□ctg416□ctg327□WAG-23N9  
ctg4216□ctg416□ctg327□WAG-24A4  
ctg4216□ctg416□ctg327□WAG-37C17  
ctg4216□ctg416□ctg327□WAG-76N2  
ctg4216□ctg416□ctg327□WAG-85N8  
ctg4216□ctg416□ctg327□WAG-95M10  
ctg4216□ctg416□ctg327□WAG-99N13  
ctg4216□ctg416□ctg327□WAG-100D22  
ctg4216□ctg416□ctg327□WAG-119E12  
ctg4216□ctg416□ctg327□WAG-125G23  
ctg4216□ctg416□ctg327□WAG-130C13  
ctg4216□ctg5048□ctg5572□WAG-42I23  
ctg4216□ctg5048□ctg5572□WAG-52I1  
ctg4216□ctg5475□ctg6551□WAG-31M6  
ctg4216□ctg5475□ctg6551□WAG-77A16  
ctg4216□ctg5616□ctg6779□WAG-20I21  
ctg4216□ctg5616□ctg6779□WAG-128I20  
ctg4216□ctg993□ctg838□WAG-25A15  
ctg4216□ctg993□ctg838□WAG-38P3  
ctg4216□ctg993□ctg838□WAG-49B8  
ctg4216□ctg993□ctg838□WAG-64F6  
ctg4216□ctg993□ctg838□WAG-101L18  
ctg4216□ctg993□ctg838□WAG-105G16  
ctg4216□ctg993□ctg838□WAG-105L20  
ctg4217□ctg2526□ctg3153□WAG-6I14  
ctg4217□ctg2526□ctg3153□WAG-32N2  
ctg4217□ctg2526□ctg3153□WAG-34G16  
ctg4217□ctg2526□ctg3153□WAG-115I4  
ctg4217□ctg2526□ctg5744□WAG-10B18  
ctg4217□ctg2526□ctg5744□WAG-118I5  
ctg4217□ctg585□□WAG-17P22  
ctg4217□ctg585□□WAG-94G10  
ctg4217□ctg585□□WAG-100I15  
ctg4217□ctg585□ctg478□WAG-2G23  
ctg4217□ctg585□ctg478□WAG-37D16  
ctg4217□ctg585□ctg478□WAG-54C2  
ctg4217□ctg585□ctg478□WAG-59N8  
ctg4217□ctg585□ctg478□WAG-62D14  
ctg4217□ctg585□ctg478□WAG-65J22

ctg4217□ctg585□ctg478□WAG-74L18  
ctg4217□ctg585□ctg478□WAG-75J11  
ctg4217□ctg585□ctg478□WAG-76C9  
ctg4217□ctg585□ctg478□WAG-83D3  
ctg4217□ctg585□ctg478□WAG-84H13  
ctg4217□ctg585□ctg478□WAG-84N14  
ctg4217□ctg585□ctg478□WAG-88L6  
ctg4217□ctg585□ctg478□WAG-93N5  
ctg4217□ctg585□ctg478□WAG-93N6  
ctg4217□ctg585□ctg478□WAG-95O19  
ctg4217□ctg585□ctg478□WAG-98P10  
ctg4217□ctg585□ctg478□WAG-110D9  
ctg4217□ctg585□ctg478□WAG-114E10  
ctg4218□ctg2440□ctg3163□WAG-20C18  
ctg4218□ctg2440□ctg3163□WAG-57C5  
ctg4218□ctg2440□ctg3163□WAG-99A4  
ctg4218□ctg2440□ctg3163□WAG-99M10  
ctg4218□ctg3365□□WAG-72H11  
ctg4218□ctg3365□ctg4539□WAG-77M5  
ctg4218□ctg3365□ctg4539□WAG-119G14  
ctg4219□□□WAG-48J7  
ctg4219□□□WAG-87I16  
ctg4219□□□WAG-121E24  
ctg4219□□□WAG-122M23  
ctg4219□ctg3996□ctg4264□WAG-93P14  
ctg4219□ctg3996□ctg4264□WAG-98N16  
ctg4219□ctg3996□ctg4264□WAG-120J21  
ctg422□ctg1761□□WAG-24P17  
ctg422□ctg1761□ctg1923□WAG-8O18  
ctg422□ctg1761□ctg1923□WAG-24F11  
ctg422□ctg1761□ctg1923□WAG-60J14  
ctg422□ctg1761□ctg1923□WAG-64K24  
ctg422□ctg1761□ctg1923□WAG-88H18  
ctg422□ctg1761□ctg1923□WAG-101I21  
ctg422□ctg1761□ctg1923□WAG-105J8  
ctg422□ctg1761□ctg1923□WAG-120C19  
ctg422□ctg1761□ctg1923□WAG-122K12  
ctg4220□ctg1452□□WAG-16O9  
ctg4220□ctg1452□ctg1304□WAG-2H14  
ctg4220□ctg1452□ctg1304□WAG-12G7  
ctg4220□ctg1452□ctg1304□WAG-31I19  
ctg4220□ctg1452□ctg1304□WAG-96I16  
ctg4220□ctg1452□ctg1304□WAG-124F18  
ctg4220□ctg4993□ctg5441□WAG-102B13  
ctg4220□ctg4993□ctg5441□WAG-114C3  
ctg4220□ctg6173□□WAG-67F22  
ctg4220□ctg6173□□WAG-122O21  
ctg4221□□□WAG-85H22  
ctg4221□ctg2314□□WAG-75P13  
ctg4221□ctg2314□□WAG-83D4  
ctg4221□ctg2314□□WAG-110D19  
ctg4221□ctg2314□ctg2875□WAG-26B18  
ctg4221□ctg2314□ctg2875□WAG-92N24  
ctg4221□ctg2314□ctg2875□WAG-116K12  
ctg4221□ctg2314□ctg2875□WAG-120D1  
ctg4221□ctg2314□ctg3575□WAG-38L9

ctg4221□ctg2314□ctg3575□WAG-70K21  
ctg4221□ctg2314□ctg3575□WAG-107M15  
ctg4221□ctg2314□ctg6759□WAG-14B21  
ctg4221□ctg2314□ctg6759□WAG-48D21  
ctg4221□ctg446□ctg2056□WAG-29G7  
ctg4221□ctg446□ctg2056□WAG-43N8  
ctg4221□ctg446□ctg2056□WAG-63F6  
ctg4221□ctg446□ctg2056□WAG-91O13  
ctg4221□ctg446□ctg358□WAG-21B11  
ctg4221□ctg446□ctg358□WAG-46C6  
ctg4221□ctg446□ctg358□WAG-64K20  
ctg4221□ctg446□ctg358□WAG-72B7  
ctg4221□ctg446□ctg358□WAG-92P15  
ctg4221□ctg446□ctg358□WAG-98B20  
ctg4221□ctg446□ctg6305□WAG-86A8  
ctg4221□ctg446□ctg6305□WAG-105G19  
ctg4222□□□WAG-56J13  
ctg4222□ctg225□□WAG-54C8  
ctg4222□ctg225□□WAG-111J7  
ctg4222□ctg225□□WAG-115C18  
ctg4222□ctg225□□WAG-130N2  
ctg4222□ctg225□ctg1803□WAG-11K7  
ctg4222□ctg225□ctg1803□WAG-33L18  
ctg4222□ctg225□ctg1803□WAG-70G17  
ctg4222□ctg225□ctg1803□WAG-86O16  
ctg4222□ctg225□ctg1803□WAG-86O21  
ctg4222□ctg225□ctg1803□WAG-103D20  
ctg4222□ctg225□ctg1803□WAG-118P8  
ctg4222□ctg225□ctg1803□WAG-119D18  
ctg4222□ctg225□ctg1803□WAG-121L18  
ctg4222□ctg225□ctg380□WAG-50J2  
ctg4222□ctg225□ctg380□WAG-52E13  
ctg4222□ctg225□ctg380□WAG-93M8  
ctg4222□ctg225□ctg380□WAG-105B16  
ctg4222□ctg225□ctg380□WAG-118G11  
ctg4222□ctg225□ctg380□WAG-127E4  
ctg4222□ctg225□ctg3898□WAG-40A13  
ctg4222□ctg225□ctg3898□WAG-54B13  
ctg4222□ctg225□ctg3898□WAG-74K14  
ctg4222□ctg225□ctg4990□WAG-96N24  
ctg4222□ctg225□ctg4990□WAG-120G20  
ctg4223□□□WAG-P9  
ctg4223□□□WAG-11A7  
ctg4223□□□WAG-21K22  
ctg4223□□□WAG-27H14  
ctg4223□□□WAG-50L2  
ctg4223□□□WAG-64E20  
ctg4223□ctg1372□□WAG-24I20  
ctg4223□ctg1372□□WAG-45E7  
ctg4223□ctg1372□□WAG-124N22  
ctg4223□ctg1372□ctg2000□WAG-23L13  
ctg4223□ctg1372□ctg2000□WAG-31D1  
ctg4223□ctg1372□ctg2000□WAG-31F20  
ctg4223□ctg1372□ctg2000□WAG-34C4  
ctg4223□ctg1372□ctg3620□WAG-61O8  
ctg4223□ctg1372□ctg3620□WAG-69F20

ctg4223□ctg3877□ctg4143□WAG-21L12  
ctg4223□ctg3877□ctg4143□WAG-117L1  
ctg4223□ctg801□□WAG-8H13  
ctg4223□ctg801□□WAG-130M4  
ctg4223□ctg801□ctg1119□WAG-1E1  
ctg4223□ctg801□ctg1119□WAG-1H22  
ctg4223□ctg801□ctg1119□WAG-4A4  
ctg4223□ctg801□ctg1119□WAG-21M10  
ctg4223□ctg801□ctg1119□WAG-56F4  
ctg4223□ctg801□ctg1119□WAG-58E5  
ctg4223□ctg801□ctg1119□WAG-59F7  
ctg4223□ctg801□ctg1119□WAG-66G10  
ctg4223□ctg801□ctg1119□WAG-78B24  
ctg4223□ctg801□ctg1119□WAG-79P4  
ctg4223□ctg801□ctg1119□WAG-110C21  
ctg4223□ctg801□ctg1119□WAG-121I17  
ctg4223□ctg908□□WAG-90O17  
ctg4223□ctg908□ctg993□WAG-15C19  
ctg4223□ctg908□ctg993□WAG-49A14  
ctg4223□ctg908□ctg993□WAG-109M11  
ctg4223□ctg908□ctg993□WAG-112H7  
ctg4224□ctg2907□□WAG-114D4  
ctg4224□ctg2907□ctg3791□WAG-16N22  
ctg4224□ctg2907□ctg3791□WAG-97B12  
ctg4225□□□WAG-7A24  
ctg4225□□□WAG-34P13  
ctg4225□ctg142□□WAG-48A17  
ctg4225□ctg142□□WAG-113N23  
ctg4225□ctg142□ctg155□WAG-24A9  
ctg4225□ctg142□ctg155□WAG-69P1  
ctg4225□ctg142□ctg155□WAG-78J8  
ctg4225□ctg142□ctg155□WAG-86E22  
ctg4225□ctg142□ctg155□WAG-89A11  
ctg4225□ctg142□ctg155□WAG-107N17  
ctg4225□ctg142□ctg155□WAG-117H20  
ctg4225□ctg142□ctg155□WAG-117I22  
ctg4225□ctg2897□ctg2980□WAG-73F7  
ctg4225□ctg2897□ctg2980□WAG-92O11  
ctg4225□ctg2897□ctg2980□WAG-103C14  
ctg4225□ctg2897□ctg3334□WAG-64H23  
ctg4225□ctg2897□ctg3334□WAG-70H16  
ctg4225□ctg2897□ctg3334□WAG-125M15  
ctg4225□ctg3170□ctg4133□WAG-12J19  
ctg4225□ctg3170□ctg4133□WAG-46D17  
ctg4225□ctg3170□ctg4133□WAG-83B23  
ctg4225□ctg3170□ctg4133□WAG-122K13  
ctg4225□ctg3170□ctg6342□WAG-30F10  
ctg4225□ctg3170□ctg6342□WAG-69K24  
ctg4225□ctg4499□ctg4630□WAG-97E5  
ctg4225□ctg4499□ctg4630□WAG-97J6  
ctg4226□□□WAG-12G22  
ctg4226□□□WAG-97G23  
ctg4226□ctg1045□□WAG-7E2  
ctg4226□ctg1045□ctg878□WAG-14N11  
ctg4226□ctg1045□ctg878□WAG-35J17  
ctg4226□ctg1045□ctg878□WAG-67N8

ctg4226□ctg1045□ctg878□WAG-69M18  
ctg4226□ctg1045□ctg878□WAG-85N23  
ctg4226□ctg1045□ctg878□WAG-99B16  
ctg4226□ctg1045□ctg878□WAG-100K12  
ctg4226□ctg1045□ctg878□WAG-100P16  
ctg4226□ctg1912□□WAG-36F13  
ctg4226□ctg1912□□WAG-66I17  
ctg4226□ctg1912□ctg2274□WAG-101B22  
ctg4226□ctg1912□ctg2274□WAG-114D11  
ctg4226□ctg1912□ctg2274□WAG-120L11  
ctg4226□ctg3865□□WAG-31G13  
ctg4226□ctg3865□□WAG-64K22  
ctg4226□ctg3865□□WAG-123A7  
ctg4226□ctg3865□ctg5557□WAG-47F9  
ctg4226□ctg3865□ctg5557□WAG-102D14  
ctg4226□ctg4946□ctg5316□WAG-17C14  
ctg4226□ctg4946□ctg5316□WAG-129M15  
ctg4227□□□WAG-N5  
ctg4227□□□WAG-112O21  
ctg4227□ctg1570□ctg1413□WAG-8H18  
ctg4227□ctg1570□ctg1413□WAG-15H15  
ctg4227□ctg1570□ctg1413□WAG-25H4  
ctg4227□ctg1570□ctg1413□WAG-26K9  
ctg4227□ctg1570□ctg1413□WAG-91K7  
ctg4227□ctg1570□ctg1413□WAG-112F18  
ctg4227□ctg1570□ctg1413□WAG-114O14  
ctg4227□ctg2549□□WAG-28G15  
ctg4227□ctg2549□ctg3317□WAG-45H13  
ctg4227□ctg2549□ctg3317□WAG-58A5  
ctg4227□ctg2549□ctg3317□WAG-71L21  
ctg4227□ctg2549□ctg3317□WAG-71M20  
ctg4227□ctg2549□ctg3317□WAG-71M21  
ctg4227□ctg2600□ctg3264□WAG-24G23  
ctg4227□ctg2600□ctg3264□WAG-48H24  
ctg4227□ctg2600□ctg3264□WAG-60L9  
ctg4227□ctg2600□ctg6239□WAG-103N21  
ctg4227□ctg2600□ctg6239□WAG-130C22  
ctg4227□ctg4277□ctg4478□WAG-44M11  
ctg4227□ctg4277□ctg4478□WAG-107L15  
ctg4228□□□WAG-32B11  
ctg4228□ctg2958□□WAG-5I10  
ctg4228□ctg2958□ctg2942□WAG-25H10  
ctg4228□ctg2958□ctg2942□WAG-40F19  
ctg4228□ctg2958□ctg2942□WAG-78B21  
ctg4228□ctg2958□ctg3973□WAG-7E10  
ctg4228□ctg2958□ctg3973□WAG-41D6  
ctg4228□ctg2958□ctg3973□WAG-74D4  
ctg4229□□□WAG-99N17  
ctg4229□ctg2556□□WAG-117B23  
ctg4229□ctg2556□ctg4349□WAG-35O12  
ctg4229□ctg2556□ctg4349□WAG-39D7  
ctg4229□ctg2556□ctg4349□WAG-129B10  
ctg4229□ctg4826□ctg5098□WAG-57O3  
ctg4229□ctg4826□ctg5098□WAG-77F20  
ctg4229□ctg4933□ctg5290□WAG-9B17  
ctg4229□ctg4933□ctg5290□WAG-79J9

ctg423□ctg1067□ctg992□WAG-16A22  
ctg423□ctg1067□ctg992□WAG-18F2  
ctg423□ctg1067□ctg992□WAG-40P1  
ctg423□ctg1067□ctg992□WAG-53G12  
ctg423□ctg1067□ctg992□WAG-65F16  
ctg423□ctg1067□ctg992□WAG-65L13  
ctg423□ctg1067□ctg992□WAG-80G24  
ctg423□ctg1067□ctg992□WAG-89L10  
ctg4230□□□WAG-120D9  
ctg4230□□□WAG-129J14  
ctg4230□ctg267□□WAG-78P19  
ctg4230□ctg267□□WAG-101M10  
ctg4230□ctg267□ctg379□WAG-12H7  
ctg4230□ctg267□ctg379□WAG-13O20  
ctg4230□ctg267□ctg379□WAG-31E23  
ctg4230□ctg267□ctg379□WAG-69O5  
ctg4230□ctg267□ctg379□WAG-71C23  
ctg4230□ctg267□ctg379□WAG-80B19  
ctg4230□ctg267□ctg379□WAG-80E12  
ctg4230□ctg267□ctg379□WAG-84A23  
ctg4230□ctg267□ctg379□WAG-91P17  
ctg4230□ctg267□ctg379□WAG-97G4  
ctg4230□ctg267□ctg379□WAG-98K6  
ctg4230□ctg267□ctg379□WAG-110B4  
ctg4230□ctg267□ctg379□WAG-124M7  
ctg4230□ctg267□ctg6940□WAG-20L17  
ctg4230□ctg267□ctg6940□WAG-22I6  
ctg4230□ctg2985□□WAG-54O8  
ctg4230□ctg2985□ctg3886□WAG-24E24  
ctg4230□ctg2985□ctg3886□WAG-40D19  
ctg4230□ctg2985□ctg3886□WAG-96J18  
ctg4231□ctg2268□□WAG-80D16  
ctg4231□ctg2268□□WAG-106J15  
ctg4231□ctg2268□ctg5726□WAG-58K6  
ctg4231□ctg2268□ctg5726□WAG-60G5  
ctg4231□ctg2268□ctg6085□WAG-42P4  
ctg4231□ctg2268□ctg6085□WAG-67N5  
ctg4231□ctg2268□ctg6826□WAG-107C6  
ctg4231□ctg2268□ctg6826□WAG-107J4  
ctg4232□ctg1607□ctg1455□WAG-52P12  
ctg4232□ctg1607□ctg1455□WAG-59D12  
ctg4232□ctg1607□ctg1455□WAG-107I1  
ctg4232□ctg1607□ctg1455□WAG-129B16  
ctg4232□ctg2246□□WAG-50F7  
ctg4232□ctg2246□ctg2789□WAG-39N9  
ctg4232□ctg2246□ctg2789□WAG-70M24  
ctg4232□ctg2246□ctg2789□WAG-79F24  
ctg4232□ctg3061□□WAG-107P22  
ctg4232□ctg3061□ctg4172□WAG-22F17  
ctg4232□ctg3061□ctg4172□WAG-130F5  
ctg4232□ctg4975□ctg5400□WAG-46F21  
ctg4232□ctg4975□ctg5400□WAG-76D10  
ctg4233□□□WAG-115K2  
ctg4233□ctg122□□WAG-24N22  
ctg4233□ctg122□□WAG-94O23  
ctg4233□ctg122□□WAG-95I7



ctg4233□ctg122□□WAG-106O17  
ctg4233□ctg122□ctg97□WAG-21C8  
ctg4233□ctg122□ctg97□WAG-39H3  
ctg4233□ctg122□ctg97□WAG-43O9  
ctg4233□ctg122□ctg97□WAG-55K7  
ctg4233□ctg122□ctg97□WAG-59D23  
ctg4233□ctg122□ctg97□WAG-71O8  
ctg4233□ctg122□ctg97□WAG-72H18  
ctg4233□ctg122□ctg97□WAG-77C7  
ctg4233□ctg122□ctg97□WAG-80L11  
ctg4233□ctg122□ctg97□WAG-82H12  
ctg4233□ctg122□ctg97□WAG-98K9  
ctg4233□ctg122□ctg97□WAG-100L10  
ctg4233□ctg122□ctg97□WAG-104D5  
ctg4233□ctg122□ctg97□WAG-106E1  
ctg4233□ctg122□ctg97□WAG-109O8  
ctg4233□ctg122□ctg97□WAG-114O2  
ctg4233□ctg122□ctg97□WAG-116I5  
ctg4233□ctg122□ctg97□WAG-118N11  
ctg4233□ctg1753□ctg1749□WAG-46G7  
ctg4233□ctg1753□ctg1749□WAG-57D6  
ctg4233□ctg1753□ctg1749□WAG-111F22  
ctg4233□ctg1753□ctg2096□WAG-12F14  
ctg4233□ctg1753□ctg2096□WAG-68J14  
ctg4233□ctg1753□ctg2096□WAG-108P12  
ctg4233□ctg1753□ctg2096□WAG-113I17  
ctg4233□ctg2386□ctg2285□WAG-90A3  
ctg4233□ctg2386□ctg2285□WAG-106L6  
ctg4233□ctg2386□ctg2285□WAG-118M6  
ctg4233□ctg2386□ctg2285□WAG-126F1  
ctg4234□□□WAG-100G19  
ctg4234□ctg2140□ctg2630□WAG-94L12  
ctg4234□ctg2140□ctg2630□WAG-111H24  
ctg4234□ctg2140□ctg2630□WAG-113N7  
ctg4234□ctg2140□ctg2630□WAG-122G19  
ctg4234□ctg2140□ctg2630□WAG-127J21  
ctg4234□ctg2140□ctg6001□WAG-98C15  
ctg4234□ctg2140□ctg6001□WAG-115P21  
ctg4235□ctg1785□□WAG-3J17  
ctg4235□ctg1785□ctg2092□WAG-20D10  
ctg4235□ctg1785□ctg2092□WAG-34A6  
ctg4235□ctg1785□ctg2092□WAG-79C10  
ctg4235□ctg1785□ctg2092□WAG-110B12  
ctg4235□ctg2007□□WAG-59E9  
ctg4235□ctg2007□ctg2046□WAG-67K24  
ctg4235□ctg2007□ctg2046□WAG-75K9  
ctg4235□ctg2007□ctg2046□WAG-76E4  
ctg4235□ctg2007□ctg2046□WAG-100H6  
ctg4235□ctg2007□ctg2046□WAG-101D16  
ctg4235□ctg2007□ctg2617□WAG-1F12  
ctg4235□ctg2007□ctg2617□WAG-24O5  
ctg4235□ctg2007□ctg2617□WAG-46D14  
ctg4235□ctg2007□ctg2617□WAG-92P10  
ctg4235□ctg2007□ctg2617□WAG-107B14  
ctg4235□ctg2007□ctg2617□WAG-116H9  
ctg4236□□□WAG-130N9

ctg4236□ctg1525□ctg1371□WAG-29K15  
ctg4236□ctg1525□ctg1371□WAG-47I2  
ctg4236□ctg1525□ctg1371□WAG-55F6  
ctg4236□ctg1525□ctg1371□WAG-86P2  
ctg4236□ctg1525□ctg4401□WAG-60J3  
ctg4236□ctg1525□ctg4401□WAG-118I10  
ctg4236□ctg1801□□WAG-37F14  
ctg4236□ctg1801□□WAG-40F5  
ctg4236□ctg1801□□WAG-102D19  
ctg4236□ctg1801□ctg2128□WAG-59D7  
ctg4236□ctg1801□ctg2128□WAG-66P7  
ctg4236□ctg1801□ctg2128□WAG-91I1  
ctg4236□ctg1801□ctg2128□WAG-94P5  
ctg4236□ctg1801□ctg2128□WAG-122I12  
ctg4236□ctg1801□ctg3492□WAG-54K20  
ctg4236□ctg1801□ctg3492□WAG-60A15  
ctg4236□ctg1801□ctg3492□WAG-72A7  
ctg4236□ctg2895□□WAG-85N17  
ctg4236□ctg2895□□WAG-89D16  
ctg4236□ctg2895□ctg3773□WAG-22D5  
ctg4236□ctg2895□ctg3773□WAG-33E7  
ctg4236□ctg3066□□WAG-36F17  
ctg4236□ctg3066□□WAG-42H14  
ctg4236□ctg3066□ctg5023□WAG-41A2  
ctg4236□ctg3066□ctg5023□WAG-101H19  
ctg4236□ctg3231□□WAG-103A18  
ctg4236□ctg3231□□WAG-107G24  
ctg4236□ctg3231□□WAG-125M9  
ctg4236□ctg3231□ctg6396□WAG-75J22  
ctg4236□ctg3231□ctg6396□WAG-82N12  
ctg4236□ctg4013□□WAG-80K3  
ctg4236□ctg4013□ctg5341□WAG-17P9  
ctg4236□ctg4013□ctg5341□WAG-94B5  
ctg4236□ctg4998□ctg5449□WAG-82F1  
ctg4236□ctg4998□ctg5449□WAG-129G2  
ctg4237□□□WAG-2H17  
ctg4237□□□WAG-13H6  
ctg4237□□□WAG-14I11  
ctg4237□□□WAG-58F18  
ctg4237□□□WAG-84K3  
ctg4237□ctg1915□□WAG-3N8  
ctg4237□ctg1915□□WAG-56B9  
ctg4237□ctg1915□ctg2280□WAG-11L8  
ctg4237□ctg1915□ctg2280□WAG-26K14  
ctg4237□ctg1915□ctg2280□WAG-43I17  
ctg4237□ctg1915□ctg2280□WAG-126K18  
ctg4237□ctg2148□ctg2641□WAG-62J24  
ctg4237□ctg2148□ctg2641□WAG-82N24  
ctg4237□ctg2148□ctg2641□WAG-93F4  
ctg4237□ctg2148□ctg5154□WAG-61E19  
ctg4237□ctg2148□ctg5154□WAG-120K18  
ctg4237□ctg6126□□WAG-111I3  
ctg4237□ctg6126□□WAG-117P7  
ctg4237□ctg832□□WAG-39J3  
ctg4237□ctg832□□WAG-123F23  
ctg4237□ctg832□ctg1062□WAG-1A4

ctg4237□ctg832□ctg1062□WAG-13M9  
ctg4237□ctg832□ctg1062□WAG-21L7  
ctg4237□ctg832□ctg1062□WAG-24E11  
ctg4237□ctg832□ctg1062□WAG-26A14  
ctg4237□ctg832□ctg1062□WAG-33E5  
ctg4237□ctg832□ctg1062□WAG-34D17  
ctg4237□ctg832□ctg1062□WAG-52F17  
ctg4237□ctg832□ctg1062□WAG-72J2  
ctg4237□ctg832□ctg1062□WAG-89D2  
ctg4237□ctg832□ctg1062□WAG-97C20  
ctg4237□ctg832□ctg1062□WAG-101A22  
ctg4237□ctg832□ctg1062□WAG-105A5  
ctg4237□ctg832□ctg1062□WAG-117C22  
ctg4238□ctg2109□ctg2586□WAG-63L22  
ctg4238□ctg2109□ctg2586□WAG-69J2  
ctg4238□ctg2109□ctg2586□WAG-81C19  
ctg4238□ctg2109□ctg3014□WAG-22K18  
ctg4238□ctg2109□ctg3014□WAG-38A1  
ctg4238□ctg2109□ctg3014□WAG-71E2  
ctg4238□ctg2109□ctg3014□WAG-90D15  
ctg4238□ctg2109□ctg3014□WAG-102K17  
ctg4238□ctg2109□ctg3014□WAG-107M3  
ctg4238□ctg2109□ctg3014□WAG-108F9  
ctg4239□ctg1711□ctg2421□WAG-49G23  
ctg4239□ctg1711□ctg2421□WAG-56M21  
ctg4239□ctg1711□ctg2421□WAG-61G14  
ctg4239□ctg1711□ctg2421□WAG-101G12  
ctg4239□ctg1711□ctg2421□WAG-117G22  
ctg4239□ctg1889□ctg1722□WAG-48H8  
ctg4239□ctg1889□ctg1722□WAG-52C12  
ctg4239□ctg1889□ctg1722□WAG-64G11  
ctg4239□ctg1889□ctg1722□WAG-76C19  
ctg424□ctg1319□□WAG-49F20  
ctg424□ctg1319□□WAG-84N19  
ctg424□ctg1319□□WAG-92G10  
ctg424□ctg1319□□WAG-107J8  
ctg424□ctg1319□□WAG-125M8  
ctg424□ctg1319□ctg1963□WAG-12B5  
ctg424□ctg1319□ctg1963□WAG-29D23  
ctg424□ctg1319□ctg1963□WAG-46N6  
ctg424□ctg1319□ctg1963□WAG-62N6  
ctg424□ctg1319□ctg1963□WAG-82I9  
ctg424□ctg1319□ctg1963□WAG-101D14  
ctg424□ctg1319□ctg1963□WAG-107J7  
ctg424□ctg1319□ctg1963□WAG-113G19  
ctg424□ctg1319□ctg4660□WAG-42K20  
ctg424□ctg1319□ctg4660□WAG-130J1  
ctg424□ctg3168□□WAG-114J12  
ctg424□ctg3168□ctg4340□WAG-33M5  
ctg424□ctg3168□ctg4340□WAG-130I13  
ctg4240□□□WAG-1K7  
ctg4240□□□WAG-3A19  
ctg4240□□□WAG-86N24  
ctg4240□□□WAG-115G22  
ctg4240□ctg1663□□WAG-63E16  
ctg4240□ctg1663□ctg1515□WAG-42P23

ctg4240□ctg1663□ctg1515□WAG-90H17  
ctg4240□ctg1663□ctg1515□WAG-102E4  
ctg4240□ctg1663□ctg1515□WAG-109E5  
ctg4240□ctg1906□□WAG-107A12  
ctg4240□ctg1906□ctg2370□WAG-29O16  
ctg4240□ctg1906□ctg2370□WAG-48G2  
ctg4240□ctg1906□ctg2370□WAG-75G11  
ctg4240□ctg1906□ctg2370□WAG-95J1  
ctg4240□ctg1906□ctg2370□WAG-120G9  
ctg4240□ctg400□ctg412□WAG-28L21  
ctg4240□ctg400□ctg412□WAG-46K22  
ctg4240□ctg400□ctg412□WAG-49P1  
ctg4240□ctg400□ctg412□WAG-63H7  
ctg4240□ctg400□ctg412□WAG-71B2  
ctg4240□ctg400□ctg412□WAG-88J15  
ctg4240□ctg400□ctg412□WAG-91O5  
ctg4240□ctg400□ctg412□WAG-95L24  
ctg4240□ctg400□ctg412□WAG-96A20  
ctg4240□ctg400□ctg412□WAG-111O20  
ctg4240□ctg400□ctg5550□WAG-32I11  
ctg4240□ctg400□ctg5550□WAG-83J1  
ctg4240□ctg594□□WAG-73M3  
ctg4240□ctg594□□WAG-115I23  
ctg4240□ctg594□ctg780□WAG-12K22  
ctg4240□ctg594□ctg780□WAG-34D10  
ctg4240□ctg594□ctg780□WAG-41A14  
ctg4240□ctg594□ctg780□WAG-59O3  
ctg4240□ctg594□ctg780□WAG-66I18  
ctg4240□ctg594□ctg780□WAG-70G9  
ctg4240□ctg594□ctg780□WAG-81D23  
ctg4240□ctg594□ctg780□WAG-89F16  
ctg4240□ctg594□ctg780□WAG-89G18  
ctg4240□ctg594□ctg780□WAG-89J10  
ctg4240□ctg594□ctg780□WAG-120B1  
ctg4241□ctg1538□ctg1386□WAG-74N16  
ctg4241□ctg1538□ctg1386□WAG-98N19  
ctg4241□ctg1538□ctg1386□WAG-127L13  
ctg4241□ctg997□□WAG-34H21  
ctg4241□ctg997□□WAG-44I4  
ctg4241□ctg997□ctg1090□WAG-11N16  
ctg4241□ctg997□ctg1090□WAG-12I1  
ctg4241□ctg997□ctg1090□WAG-59E12  
ctg4241□ctg997□ctg1090□WAG-59F1  
ctg4241□ctg997□ctg1090□WAG-70I22  
ctg4241□ctg997□ctg1090□WAG-85B11  
ctg4241□ctg997□ctg1090□WAG-129N3  
ctg4241□ctg997□ctg2153□WAG-66J20  
ctg4241□ctg997□ctg2153□WAG-116J11  
ctg4241□ctg997□ctg2153□WAG-124H23  
ctg4242□□□WAG-5L6  
ctg4242□ctg1521□□WAG-123I21  
ctg4242□ctg1521□ctg1811□WAG-68K11  
ctg4242□ctg1521□ctg1811□WAG-69M22  
ctg4242□ctg1521□ctg1811□WAG-73B12  
ctg4242□ctg1521□ctg1811□WAG-97F15  
ctg4242□ctg1521□ctg1811□WAG-109M17

ctg4242□ctg1521□ctg1811□WAG-127H12  
ctg4242□ctg944□□WAG-49A8  
ctg4242□ctg944□□WAG-125D24  
ctg4242□ctg944□ctg1021□WAG-25J12  
ctg4242□ctg944□ctg1021□WAG-30M9  
ctg4242□ctg944□ctg1021□WAG-52O17  
ctg4242□ctg944□ctg1021□WAG-62M4  
ctg4242□ctg944□ctg1021□WAG-83N1  
ctg4242□ctg944□ctg1021□WAG-115H3  
ctg4243□□□WAG-3N3  
ctg4243□ctg1502□□WAG-47G10  
ctg4243□ctg1502□ctg1780□WAG-21K20  
ctg4243□ctg1502□ctg1780□WAG-24O13  
ctg4243□ctg1502□ctg1780□WAG-109F2  
ctg4243□ctg1502□ctg1780□WAG-117N8  
ctg4244□ctg1775□ctg2083□WAG-14K15  
ctg4244□ctg1775□ctg2083□WAG-35F13  
ctg4244□ctg1775□ctg2083□WAG-78O23  
ctg4244□ctg1775□ctg2083□WAG-81C11  
ctg4244□ctg1775□ctg2083□WAG-88L7  
ctg4244□ctg1775□ctg2083□WAG-89N17  
ctg4244□ctg1775□ctg2083□WAG-91C7  
ctg4244□ctg1775□ctg2083□WAG-105N9  
ctg4244□ctg192□ctg157□WAG-10O23  
ctg4244□ctg192□ctg157□WAG-12J3  
ctg4244□ctg192□ctg157□WAG-40F3  
ctg4244□ctg192□ctg157□WAG-70E24  
ctg4244□ctg192□ctg157□WAG-78G14  
ctg4244□ctg192□ctg157□WAG-82G9  
ctg4244□ctg192□ctg157□WAG-88C16  
ctg4244□ctg192□ctg157□WAG-106M4  
ctg4244□ctg192□ctg157□WAG-123D5  
ctg4244□ctg2151□ctg3138□WAG-16M15  
ctg4244□ctg2151□ctg3138□WAG-55E1  
ctg4244□ctg2151□ctg3138□WAG-108B5  
ctg4244□ctg2151□ctg3138□WAG-124J8  
ctg4244□ctg2151□ctg4141□WAG-50K13  
ctg4244□ctg2151□ctg4141□WAG-110P15  
ctg4244□ctg2151□ctg4141□WAG-125M14  
ctg4244□ctg3185□ctg3209□WAG-58F7  
ctg4244□ctg3185□ctg3209□WAG-107P6  
ctg4244□ctg877□ctg721□WAG-22A18  
ctg4244□ctg877□ctg721□WAG-30L21  
ctg4244□ctg877□ctg721□WAG-48C8  
ctg4244□ctg877□ctg721□WAG-58F11  
ctg4244□ctg877□ctg721□WAG-71K2  
ctg4245□□□WAG-23P5  
ctg4245□ctg2483□ctg2407□WAG-18N16  
ctg4245□ctg2483□ctg2407□WAG-33K23  
ctg4245□ctg2483□ctg2407□WAG-44M7  
ctg4245□ctg2483□ctg2407□WAG-82O4  
ctg4245□ctg2483□ctg2407□WAG-83D10  
ctg4245□ctg2483□ctg2407□WAG-115A8  
ctg4245□ctg2483□ctg5806□WAG-18L14  
ctg4245□ctg2483□ctg5806□WAG-58J3  
ctg4245□ctg976□ctg819□WAG-21E10

ctg4245□ctg976□ctg819□WAG-22C2  
ctg4245□ctg976□ctg819□WAG-65C7  
ctg4245□ctg976□ctg819□WAG-113H20  
ctg4245□ctg976□ctg819□WAG-114D22  
ctg4246□□□WAG-38A18  
ctg4246□□□WAG-59P14  
ctg4246□ctg1034□□WAG-60F22  
ctg4246□ctg1034□ctg1189□WAG-17D3  
ctg4246□ctg1034□ctg1189□WAG-33N8  
ctg4246□ctg1034□ctg1189□WAG-58B19  
ctg4246□ctg1034□ctg1189□WAG-76D24  
ctg4246□ctg1034□ctg1189□WAG-83H16  
ctg4246□ctg1034□ctg1189□WAG-96G14  
ctg4246□ctg1034□ctg1189□WAG-96O13  
ctg4246□ctg1034□ctg1189□WAG-97M8  
ctg4246□ctg1034□ctg1189□WAG-106L13  
ctg4246□ctg1034□ctg1189□WAG-112B13  
ctg4246□ctg1034□ctg1189□WAG-117O9  
ctg4246□ctg426□□WAG-13C13  
ctg4246□ctg426□□WAG-26F14  
ctg4246□ctg426□ctg1494□WAG-50L22  
ctg4246□ctg426□ctg1494□WAG-115N1  
ctg4246□ctg426□ctg1494□WAG-121K11  
ctg4246□ctg426□ctg1494□WAG-127P23  
ctg4246□ctg426□ctg430□WAG-22O20  
ctg4246□ctg426□ctg430□WAG-45B21  
ctg4246□ctg426□ctg430□WAG-55C20  
ctg4246□ctg426□ctg430□WAG-66B23  
ctg4246□ctg426□ctg430□WAG-69E19  
ctg4246□ctg426□ctg430□WAG-83E10  
ctg4246□ctg426□ctg430□WAG-113H24  
ctg4246□ctg426□ctg430□WAG-117L18  
ctg4247□ctg1326□□WAG-16J20  
ctg4247□ctg1326□□WAG-62J6  
ctg4247□ctg1326□□WAG-63L10  
ctg4247□ctg1326□ctg1173□WAG-30M18  
ctg4247□ctg1326□ctg1173□WAG-46H10  
ctg4247□ctg1326□ctg1173□WAG-92I8  
ctg4247□ctg1326□ctg1173□WAG-100G13  
ctg4247□ctg1326□ctg1173□WAG-116L12  
ctg4247□ctg1326□ctg1173□WAG-118G16  
ctg4247□ctg1326□ctg1173□WAG-126C2  
ctg4247□ctg1396□ctg1245□WAG-13H9  
ctg4247□ctg1396□ctg1245□WAG-68F4  
ctg4247□ctg1396□ctg1245□WAG-78O1  
ctg4247□ctg1396□ctg1245□WAG-94A6  
ctg4247□ctg6249□□WAG-52O15  
ctg4247□ctg6249□□WAG-117D19  
ctg4248□□□WAG-44P8  
ctg4248□ctg1254□□WAG-10G9  
ctg4248□ctg1254□ctg1477□WAG-52D11  
ctg4248□ctg1254□ctg1477□WAG-69P9  
ctg4248□ctg1254□ctg1477□WAG-108C20  
ctg4248□ctg1254□ctg1477□WAG-112B9  
ctg4248□ctg1254□ctg5501□WAG-60H15  
ctg4248□ctg1254□ctg5501□WAG-99H4

ctg4248□ctg2799□ctg2794□WAG-14A4  
ctg4248□ctg2799□ctg2794□WAG-57N24  
ctg4248□ctg2799□ctg2794□WAG-93P3  
ctg4248□ctg2799□ctg2794□WAG-105B19  
ctg4249□ctg1208□ctg1401□WAG-58K2  
ctg4249□ctg1208□ctg1401□WAG-67A23  
ctg4249□ctg1208□ctg1401□WAG-70N12  
ctg4249□ctg1208□ctg1401□WAG-107H12  
ctg4249□ctg1208□ctg1401□WAG-117A21  
ctg4249□ctg1208□ctg1401□WAG-126J17  
ctg4249□ctg1208□ctg1793□WAG-52P13  
ctg4249□ctg1208□ctg1793□WAG-55H9  
ctg4249□ctg1208□ctg1793□WAG-69B22  
ctg4249□ctg1208□ctg1793□WAG-90D19  
ctg4249□ctg1208□ctg1793□WAG-125B23  
ctg425□□□WAG-12P11  
ctg425□□□WAG-68H19  
ctg425□□□WAG-78L22  
ctg425□□□WAG-117D9  
ctg425□ctg1366□□WAG-71I9  
ctg425□ctg1366□ctg1536□WAG-17N14  
ctg425□ctg1366□ctg1536□WAG-45E16  
ctg425□ctg1366□ctg1536□WAG-62O8  
ctg425□ctg1366□ctg1536□WAG-119A17  
ctg425□ctg1366□ctg1536□WAG-128A24  
ctg425□ctg1366□ctg1536□WAG-130K4  
ctg425□ctg6383□□WAG-8L19  
ctg425□ctg6383□□WAG-102J18  
ctg4250□□□WAG-15J4  
ctg4250□□□WAG-81J14  
ctg4250□□□WAG-98D19  
ctg4250□ctg1127□ctg2610□WAG-23P6  
ctg4250□ctg1127□ctg2610□WAG-64H13  
ctg4250□ctg1127□ctg2610□WAG-103H2  
ctg4250□ctg1127□ctg962□WAG-53K23  
ctg4250□ctg1127□ctg962□WAG-76G10  
ctg4250□ctg1127□ctg962□WAG-83B18  
ctg4250□ctg1127□ctg962□WAG-107O7  
ctg4250□ctg1127□ctg962□WAG-116L11  
ctg4250□ctg1127□ctg962□WAG-117L7  
ctg4250□ctg2692□ctg2673□WAG-2A24  
ctg4250□ctg2692□ctg2673□WAG-124J15  
ctg4250□ctg2692□ctg2673□WAG-129M4  
ctg4250□ctg2692□ctg2673□WAG-130B12  
ctg4251□□□WAG-37K10  
ctg4251□□□WAG-100P21  
ctg4251□ctg5301□ctg6147□WAG-3D9  
ctg4251□ctg5301□ctg6147□WAG-3P3  
ctg4251□ctg881□□WAG-127H6  
ctg4251□ctg881□ctg906□WAG-57A19  
ctg4251□ctg881□ctg906□WAG-66H4  
ctg4251□ctg881□ctg906□WAG-77A8  
ctg4251□ctg881□ctg906□WAG-92B12  
ctg4251□ctg881□ctg906□WAG-93F16  
ctg4251□ctg881□ctg906□WAG-106F15  
ctg4251□ctg881□ctg906□WAG-109A24

ctg4251□ctg881□ctg906□WAG-124K15  
ctg4252□□□WAG-6J17  
ctg4252□□□WAG-48L1  
ctg4252□ctg1731□ctg2109□WAG-22L19  
ctg4252□ctg1731□ctg2109□WAG-46B10  
ctg4252□ctg1731□ctg2109□WAG-96G4  
ctg4252□ctg1731□ctg2109□WAG-119F6  
ctg4252□ctg3002□□WAG-83O8  
ctg4252□ctg3002□□WAG-100N2  
ctg4252□ctg3002□□WAG-129P8  
ctg4252□ctg3002□ctg2987□WAG-63C21  
ctg4252□ctg3002□ctg2987□WAG-120M8  
ctg4252□ctg3002□ctg2987□WAG-130J22  
ctg4252□ctg4662□□WAG-43A13  
ctg4252□ctg4662□□WAG-82A2  
ctg4252□ctg4662□□WAG-129K13  
ctg4252□ctg5212□ctg5949□WAG-6D1  
ctg4252□ctg5212□ctg5949□WAG-78J5  
ctg4252□ctg917□ctg761□WAG-42O7  
ctg4252□ctg917□ctg761□WAG-47A20  
ctg4252□ctg917□ctg761□WAG-104G24  
ctg4252□ctg917□ctg761□WAG-113B21  
ctg4252□ctg917□ctg761□WAG-119F11  
ctg4253□□□WAG-22P17  
ctg4253□□□WAG-34C22  
ctg4253□□□WAG-43J7  
ctg4253□□□WAG-88D18  
ctg4253□ctg1859□□WAG-110G18  
ctg4253□ctg1859□ctg2286□WAG-73N18  
ctg4253□ctg1859□ctg2286□WAG-113G7  
ctg4253□ctg1859□ctg2286□WAG-129K5  
ctg4253□ctg1859□ctg2286□WAG-130G14  
ctg4253□ctg33□ctg29□WAG-7I23  
ctg4253□ctg33□ctg29□WAG-7M16  
ctg4253□ctg33□ctg29□WAG-26B6  
ctg4253□ctg33□ctg29□WAG-37E6  
ctg4253□ctg33□ctg29□WAG-45J21  
ctg4253□ctg33□ctg29□WAG-45N5  
ctg4253□ctg33□ctg29□WAG-58E1  
ctg4253□ctg33□ctg29□WAG-68F17  
ctg4253□ctg33□ctg29□WAG-71N5  
ctg4253□ctg33□ctg29□WAG-72F7  
ctg4253□ctg33□ctg29□WAG-75G6  
ctg4253□ctg33□ctg29□WAG-101A2  
ctg4253□ctg33□ctg29□WAG-119O23  
ctg4253□ctg33□ctg29□WAG-128M18  
ctg4253□ctg911□ctg1582□WAG-4K16  
ctg4253□ctg911□ctg1582□WAG-19E17  
ctg4253□ctg911□ctg1582□WAG-51E14  
ctg4253□ctg911□ctg1582□WAG-56B1  
ctg4253□ctg911□ctg1582□WAG-62J7  
ctg4253□ctg911□ctg1582□WAG-70K5  
ctg4253□ctg911□ctg1582□WAG-102B9  
ctg4253□ctg911□ctg1582□WAG-105D3  
ctg4253□ctg911□ctg1582□WAG-109F4  
ctg4253□ctg911□ctg1582□WAG-122M7



ctg4253□ctg911□ctg1582□WAG-125J1  
ctg4254□□□WAG-27C17  
ctg4254□ctg2431□ctg2339□WAG-25D17  
ctg4254□ctg2431□ctg2339□WAG-29H23  
ctg4254□ctg2431□ctg2339□WAG-73F23  
ctg4254□ctg2431□ctg2339□WAG-83D2  
ctg4254□ctg2431□ctg2339□WAG-86O20  
ctg4254□ctg2431□ctg2339□WAG-114P11  
ctg4254□ctg895□ctg6807□WAG-23E21  
ctg4254□ctg895□ctg6807□WAG-123K6  
ctg4254□ctg895□ctg848□WAG-28P19  
ctg4254□ctg895□ctg848□WAG-33B16  
ctg4254□ctg895□ctg848□WAG-33C13  
ctg4254□ctg895□ctg848□WAG-56B21  
ctg4254□ctg895□ctg848□WAG-60D18  
ctg4255□□□WAG-5J23  
ctg4255□□□WAG-52K23  
ctg4255□□□WAG-106E6  
ctg4255□□□WAG-113C10  
ctg4255□ctg1043□ctg2048□WAG-20I14  
ctg4255□ctg1043□ctg2048□WAG-25N7  
ctg4255□ctg1043□ctg2048□WAG-38M18  
ctg4255□ctg1043□ctg2048□WAG-48C23  
ctg4255□ctg1043□ctg2048□WAG-53A23  
ctg4255□ctg1043□ctg2048□WAG-53P22  
ctg4255□ctg1043□ctg2048□WAG-66F1  
ctg4255□ctg1043□ctg2048□WAG-78M1  
ctg4255□ctg1043□ctg2048□WAG-85G4  
ctg4255□ctg1043□ctg2048□WAG-114N13  
ctg4255□ctg1043□ctg3741□WAG-7P21  
ctg4255□ctg1043□ctg3741□WAG-21P15  
ctg4255□ctg1043□ctg3741□WAG-112K21  
ctg4255□ctg1100□□WAG-123J22  
ctg4255□ctg1100□ctg1231□WAG-10D5  
ctg4255□ctg1100□ctg1231□WAG-30I9  
ctg4255□ctg1100□ctg1231□WAG-52H6  
ctg4255□ctg1100□ctg1231□WAG-77P7  
ctg4255□ctg1100□ctg1231□WAG-86O23  
ctg4255□ctg1100□ctg1581□WAG-40L19  
ctg4255□ctg1100□ctg1581□WAG-67L4  
ctg4255□ctg1100□ctg1581□WAG-90M2  
ctg4255□ctg1416□ctg1476□WAG-2M18  
ctg4255□ctg1416□ctg1476□WAG-38F8  
ctg4255□ctg1416□ctg1476□WAG-39F15  
ctg4255□ctg1416□ctg1476□WAG-85I2  
ctg4255□ctg1416□ctg1476□WAG-91D9  
ctg4255□ctg1416□ctg1476□WAG-103D9  
ctg4255□ctg1416□ctg1476□WAG-124H16  
ctg4255□ctg1416□ctg3778□WAG-14F22  
ctg4255□ctg1416□ctg3778□WAG-41F12  
ctg4255□ctg1416□ctg3778□WAG-104L21  
ctg4255□ctg1416□ctg3778□WAG-120M5  
ctg4255□ctg1416□ctg3979□WAG-66F10  
ctg4255□ctg1416□ctg3979□WAG-80B4  
ctg4255□ctg1416□ctg3979□WAG-115K5  
ctg4255□ctg1416□ctg5944□WAG-14K9

ctg4255□ctg1416□ctg5944□WAG-31L5  
ctg4255□ctg1416□ctg6816□WAG-20E22  
ctg4255□ctg1416□ctg6816□WAG-74C13  
ctg4255□ctg1566□□WAG-73A8  
ctg4255□ctg1566□ctg2442□WAG-56C13  
ctg4255□ctg1566□ctg2442□WAG-62O22  
ctg4255□ctg1566□ctg2442□WAG-66H3  
ctg4255□ctg1566□ctg2442□WAG-87F16  
ctg4255□ctg1566□ctg2442□WAG-105F9  
ctg4255□ctg1566□ctg2442□WAG-107F19  
ctg4255□ctg1566□ctg2442□WAG-127M3  
ctg4255□ctg1566□ctg2766□WAG-37F5  
ctg4255□ctg1566□ctg2766□WAG-100J24  
ctg4255□ctg880□ctg915□WAG-43C20  
ctg4255□ctg880□ctg915□WAG-56N5  
ctg4255□ctg880□ctg915□WAG-75P6  
ctg4255□ctg880□ctg915□WAG-88B23  
ctg4255□ctg880□ctg915□WAG-99C17  
ctg4255□ctg880□ctg915□WAG-103I15  
ctg4256□□□WAG-43P7  
ctg4256□ctg1229□□WAG-50F5  
ctg4256□ctg1229□ctg1070□WAG-10G23  
ctg4256□ctg1229□ctg1070□WAG-14J17  
ctg4256□ctg1229□ctg1070□WAG-21I4  
ctg4256□ctg1229□ctg1070□WAG-29A5  
ctg4256□ctg1229□ctg1070□WAG-92B8  
ctg4256□ctg1229□ctg1070□WAG-96I15  
ctg4256□ctg1229□ctg1070□WAG-96P24  
ctg4256□ctg83□ctg1760□WAG-83M24  
ctg4256□ctg83□ctg1760□WAG-86F11  
ctg4256□ctg83□ctg1760□WAG-115P18  
ctg4256□ctg83□ctg711□WAG-35A21  
ctg4256□ctg83□ctg711□WAG-38F11  
ctg4256□ctg83□ctg711□WAG-46I21  
ctg4256□ctg83□ctg711□WAG-54A21  
ctg4256□ctg83□ctg711□WAG-59K21  
ctg4256□ctg83□ctg711□WAG-63O18  
ctg4256□ctg83□ctg711□WAG-92C18  
ctg4256□ctg83□ctg711□WAG-118C16  
ctg4256□ctg83□ctg77□WAG-14C11  
ctg4256□ctg83□ctg77□WAG-14I12  
ctg4256□ctg83□ctg77□WAG-32I4  
ctg4256□ctg83□ctg77□WAG-34B2  
ctg4256□ctg83□ctg77□WAG-34J6  
ctg4256□ctg83□ctg77□WAG-40B1  
ctg4256□ctg83□ctg77□WAG-41D10  
ctg4256□ctg83□ctg77□WAG-45O7  
ctg4256□ctg83□ctg77□WAG-62E5  
ctg4256□ctg83□ctg77□WAG-68H2  
ctg4256□ctg83□ctg77□WAG-74M7  
ctg4256□ctg83□ctg77□WAG-74N9  
ctg4256□ctg83□ctg77□WAG-83I8  
ctg4256□ctg83□ctg77□WAG-89H17  
ctg4256□ctg83□ctg77□WAG-94D14  
ctg4256□ctg83□ctg77□WAG-95B13  
ctg4256□ctg83□ctg77□WAG-102N3

ctg4256□ctg83□ctg77□WAG-109M4  
ctg4256□ctg83□ctg77□WAG-117M17  
ctg4256□ctg83□ctg77□WAG-124D10  
ctg4256□ctg83□ctg77□WAG-126F15  
ctg4256□ctg83□ctg77□WAG-126N6  
ctg4256□ctg83□ctg774□WAG-12M24  
ctg4256□ctg83□ctg774□WAG-13G23  
ctg4256□ctg83□ctg774□WAG-14P5  
ctg4256□ctg83□ctg774□WAG-88D14  
ctg4256□ctg83□ctg774□WAG-104M14  
ctg4256□ctg83□ctg774□WAG-126C12  
ctg4256□ctg83□ctg774□WAG-126F19  
ctg4257□□□WAG-94M20  
ctg4257□ctg720□□WAG-13O1  
ctg4257□ctg720□□WAG-31A21  
ctg4257□ctg720□ctg2525□WAG-19N20  
ctg4257□ctg720□ctg2525□WAG-49K2  
ctg4257□ctg720□ctg2525□WAG-50P24  
ctg4257□ctg720□ctg2525□WAG-102B5  
ctg4257□ctg720□ctg762□WAG-17E12  
ctg4257□ctg720□ctg762□WAG-40F4  
ctg4257□ctg720□ctg762□WAG-59A11  
ctg4257□ctg720□ctg762□WAG-71F23  
ctg4257□ctg720□ctg762□WAG-86N14  
ctg4257□ctg720□ctg762□WAG-108G19  
ctg4257□ctg720□ctg762□WAG-128H12  
ctg4258□□□WAG-15B2  
ctg4258□□□WAG-93G4  
ctg4258□□□WAG-108A9  
ctg4258□□□WAG-120O19  
ctg4258□ctg1909□□WAG-31A15  
ctg4258□ctg1909□ctg2953□WAG-16E24  
ctg4258□ctg1909□ctg2953□WAG-19K11  
ctg4258□ctg1909□ctg2953□WAG-32H3  
ctg4258□ctg1909□ctg4309□WAG-2M23  
ctg4258□ctg1909□ctg4309□WAG-21M22  
ctg4258□ctg1909□ctg4309□WAG-78C5  
ctg4258□ctg1909□ctg5119□WAG-31A20  
ctg4258□ctg1909□ctg5119□WAG-61K6  
ctg4258□ctg2821□□WAG-126M22  
ctg4258□ctg2821□ctg3839□WAG-24O6  
ctg4258□ctg2821□ctg3839□WAG-39B5  
ctg4258□ctg2821□ctg3839□WAG-106D14  
ctg4259□ctg1306□□WAG-110G3  
ctg4259□ctg1306□ctg1856□WAG-4E8  
ctg4259□ctg1306□ctg1856□WAG-56J4  
ctg4259□ctg1306□ctg1856□WAG-67A10  
ctg4259□ctg1306□ctg1856□WAG-76N18  
ctg4259□ctg1306□ctg1856□WAG-77G8  
ctg4259□ctg1306□ctg1856□WAG-89M8  
ctg4259□ctg1306□ctg1856□WAG-130H1  
ctg4259□ctg1306□ctg6213□WAG-75K23  
ctg4259□ctg1306□ctg6213□WAG-124E14  
ctg4259□ctg2480□ctg3095□WAG-22D12  
ctg4259□ctg2480□ctg3095□WAG-63I4  
ctg4259□ctg2480□ctg3095□WAG-77K5

ctg4259□ctg2480□ctg5439□WAG-88H2  
ctg4259□ctg2480□ctg5439□WAG-107A24  
ctg426□□□WAG-114G21  
ctg426□ctg1453□□WAG-24G15  
ctg426□ctg1453□□WAG-35N14  
ctg426□ctg1453□ctg2985□WAG-3I9  
ctg426□ctg1453□ctg2985□WAG-3J8  
ctg426□ctg1453□ctg2985□WAG-17A11  
ctg426□ctg1453□ctg2985□WAG-61K11  
ctg426□ctg1453□ctg4474□WAG-55N20  
ctg426□ctg1453□ctg4474□WAG-88E15  
ctg426□ctg1453□ctg5956□WAG-42N24  
ctg426□ctg1453□ctg5956□WAG-111G9  
ctg4260□ctg151□ctg160□WAG-19E15  
ctg4260□ctg151□ctg160□WAG-25J17  
ctg4260□ctg151□ctg160□WAG-42A5  
ctg4260□ctg151□ctg160□WAG-48A7  
ctg4260□ctg151□ctg160□WAG-77H4  
ctg4260□ctg151□ctg160□WAG-81M7  
ctg4260□ctg151□ctg160□WAG-99J18  
ctg4260□ctg151□ctg160□WAG-101E6  
ctg4260□ctg151□ctg6247□WAG-16G11  
ctg4260□ctg151□ctg6247□WAG-114C15  
ctg4261□□□WAG-51P4  
ctg4261□ctg1422□ctg2238□WAG-10N8  
ctg4261□ctg1422□ctg2238□WAG-43L19  
ctg4261□ctg1422□ctg2238□WAG-52G10  
ctg4261□ctg1422□ctg2238□WAG-70L8  
ctg4261□ctg1422□ctg2238□WAG-81H9  
ctg4261□ctg1422□ctg2238□WAG-105J24  
ctg4261□ctg1422□ctg2238□WAG-112B16  
ctg4261□ctg1468□□WAG-13J1  
ctg4261□ctg1468□ctg1670□WAG-12M5  
ctg4261□ctg1468□ctg1670□WAG-16L13  
ctg4261□ctg1468□ctg1670□WAG-26G12  
ctg4261□ctg1468□ctg1670□WAG-55P7  
ctg4261□ctg1468□ctg1670□WAG-101D21  
ctg4261□ctg186□□WAG-4E13  
ctg4261□ctg186□ctg154□WAG-10B9  
ctg4261□ctg186□ctg154□WAG-45I9  
ctg4261□ctg186□ctg154□WAG-56P13  
ctg4261□ctg186□ctg154□WAG-57K6  
ctg4261□ctg186□ctg154□WAG-72F23  
ctg4261□ctg186□ctg154□WAG-107H23  
ctg4262□□□WAG-1F6  
ctg4262□□□WAG-2P10  
ctg4262□□□WAG-30E4  
ctg4262□ctg170□□WAG-93C24  
ctg4262□ctg170□ctg173□WAG-50A11  
ctg4262□ctg170□ctg173□WAG-52A20  
ctg4262□ctg170□ctg173□WAG-64G22  
ctg4262□ctg170□ctg173□WAG-74E18  
ctg4262□ctg170□ctg173□WAG-90C7  
ctg4262□ctg170□ctg173□WAG-91E12  
ctg4262□ctg170□ctg173□WAG-96D13  
ctg4262□ctg170□ctg173□WAG-103B17

ctg4262□ctg170□ctg173□WAG-105E2  
ctg4262□ctg170□ctg173□WAG-115K3  
ctg4262□ctg170□ctg173□WAG-127C24  
ctg4262□ctg170□ctg173□WAG-129M7  
ctg4262□ctg170□ctg4917□WAG-59I8  
ctg4262□ctg170□ctg4917□WAG-113G21  
ctg4262□ctg3498□ctg3621□WAG-15A9  
ctg4262□ctg3498□ctg3621□WAG-46M17  
ctg4262□ctg3561□ctg3729□WAG-18D8  
ctg4262□ctg3561□ctg3729□WAG-109H9  
ctg4262□ctg3561□ctg3729□WAG-111J21  
ctg4262□ctg396□□WAG-56M8  
ctg4262□ctg396□ctg1841□WAG-13A20  
ctg4262□ctg396□ctg1841□WAG-48B18  
ctg4262□ctg396□ctg1841□WAG-77C22  
ctg4262□ctg396□ctg1841□WAG-97M2  
ctg4262□ctg396□ctg1841□WAG-109O3  
ctg4262□ctg396□ctg524□WAG-33O2  
ctg4262□ctg396□ctg524□WAG-70F19  
ctg4262□ctg396□ctg524□WAG-74B24  
ctg4262□ctg396□ctg524□WAG-78H21  
ctg4262□ctg396□ctg524□WAG-84O8  
ctg4262□ctg396□ctg524□WAG-96P15  
ctg4262□ctg396□ctg524□WAG-107G9  
ctg4262□ctg396□ctg524□WAG-108H10  
ctg4262□ctg396□ctg524□WAG-111K10  
ctg4262□ctg396□ctg524□WAG-116P8  
ctg4262□ctg396□ctg524□WAG-117D6  
ctg4262□ctg396□ctg728□WAG-20B10  
ctg4262□ctg396□ctg728□WAG-22O6  
ctg4262□ctg396□ctg728□WAG-44B14  
ctg4262□ctg396□ctg728□WAG-48I6  
ctg4262□ctg396□ctg728□WAG-76K21  
ctg4262□ctg396□ctg728□WAG-108G21  
ctg4262□ctg396□ctg728□WAG-125C21  
ctg4262□ctg4727□ctg4915□WAG-123O16  
ctg4262□ctg4727□ctg4915□WAG-126M15  
ctg4262□ctg4953□ctg5338□WAG-O17  
ctg4262□ctg4953□ctg5338□WAG-98J14  
ctg4262□ctg583□□WAG-16O13  
ctg4262□ctg583□□WAG-74D24  
ctg4262□ctg583□ctg766□WAG-25N2  
ctg4262□ctg583□ctg766□WAG-44I7  
ctg4262□ctg583□ctg766□WAG-51G24  
ctg4262□ctg583□ctg766□WAG-51N13  
ctg4262□ctg583□ctg766□WAG-65I3  
ctg4262□ctg583□ctg766□WAG-70B2  
ctg4262□ctg583□ctg766□WAG-95H20  
ctg4262□ctg583□ctg766□WAG-99N14  
ctg4262□ctg583□ctg766□WAG-102A1  
ctg4262□ctg583□ctg766□WAG-109D11  
ctg4262□ctg583□ctg766□WAG-121I24  
ctg4262□ctg583□ctg766□WAG-122B11  
ctg4262□ctg583□ctg766□WAG-129C11  
ctg4263□□□WAG-21B16  
ctg4263□□□WAG-30A22

ctg4264□□□WAG-1L1  
ctg4264□□□WAG-14J11  
ctg4264□□□WAG-124O5  
ctg4265□ctg3908□ctg4190□WAG-39J15  
ctg4265□ctg3908□ctg4190□WAG-89E10  
ctg4266□ctg3737□ctg4902□WAG-43H12  
ctg4266□ctg3737□ctg4902□WAG-57L1  
ctg4266□ctg3737□ctg5857□WAG-61P13  
ctg4266□ctg3737□ctg5857□WAG-82N9  
ctg4267□ctg3105□□WAG-95H9  
ctg4267□ctg3105□ctg4075□WAG-76K8  
ctg4267□ctg3105□ctg4075□WAG-107O22  
ctg4267□ctg3105□ctg4075□WAG-123A3  
ctg4268□□□WAG-88C1  
ctg4268□ctg1581□ctg2677□WAG-8O1  
ctg4268□ctg1581□ctg2677□WAG-11F4  
ctg4268□ctg1581□ctg2677□WAG-15F1  
ctg4268□ctg1581□ctg2677□WAG-18H17  
ctg4268□ctg1581□ctg2677□WAG-24B20  
ctg4268□ctg1581□ctg2677□WAG-36H21  
ctg4268□ctg1581□ctg2677□WAG-71P20  
ctg4268□ctg200□□WAG-52O6  
ctg4268□ctg200□□WAG-86O5  
ctg4268□ctg200□□WAG-110H9  
ctg4268□ctg200□ctg207□WAG-23A22  
ctg4268□ctg200□ctg207□WAG-62H12  
ctg4268□ctg200□ctg207□WAG-67C5  
ctg4268□ctg200□ctg207□WAG-79A8  
ctg4268□ctg200□ctg207□WAG-79F14  
ctg4268□ctg200□ctg207□WAG-105P10  
ctg4268□ctg200□ctg207□WAG-128B7  
ctg4268□ctg2986□ctg2969□WAG-82N15  
ctg4268□ctg2986□ctg2969□WAG-99M1  
ctg4268□ctg2986□ctg2969□WAG-123E7  
ctg4268□ctg3194□ctg3214□WAG-13I8  
ctg4268□ctg3194□ctg3214□WAG-28C16  
ctg4268□ctg3194□ctg3214□WAG-39P9  
ctg4268□ctg3194□ctg3214□WAG-61G17  
ctg4269□ctg2763□ctg2743□WAG-68G16  
ctg4269□ctg2763□ctg2743□WAG-124C13  
ctg427□ctg3637□□WAG-117B15  
ctg427□ctg3637□ctg4935□WAG-45M15  
ctg427□ctg3637□ctg4935□WAG-123D3  
ctg427□ctg987□ctg834□WAG-16D5  
ctg427□ctg987□ctg834□WAG-38N21  
ctg427□ctg987□ctg834□WAG-93G10  
ctg427□ctg987□ctg834□WAG-104J17  
ctg427□ctg987□ctg834□WAG-115E11  
ctg427□ctg987□ctg834□WAG-129F22  
ctg4270□□□WAG-65O23  
ctg4270□ctg2597□□WAG-C19  
ctg4270□ctg2597□ctg3249□WAG-69O18  
ctg4270□ctg2597□ctg3249□WAG-109E4  
ctg4270□ctg2597□ctg3249□WAG-123H6  
ctg4270□ctg3021□□WAG-89E14  
ctg4270□ctg3021□ctg3569□WAG-13O7

ctg4270□ctg3021□ctg3569□WAG-28N22  
ctg4270□ctg3021□ctg3569□WAG-76B10  
ctg4270□ctg3021□ctg3569□WAG-98A16  
ctg4270□ctg3021□ctg3569□WAG-119D12  
ctg4270□ctg3021□ctg4126□WAG-107D16  
ctg4270□ctg3021□ctg4126□WAG-116L13  
ctg4271□□□WAG-129I11  
ctg4271□ctg5261□ctg6070□WAG-60J15  
ctg4271□ctg5261□ctg6070□WAG-85A8  
ctg4272□□□WAG-106N4  
ctg4272□ctg2511□ctg2444□WAG-17L20  
ctg4272□ctg2511□ctg2444□WAG-36P14  
ctg4272□ctg2511□ctg2444□WAG-67M23  
ctg4272□ctg2511□ctg2444□WAG-89J20  
ctg4272□ctg3680□□WAG-58D6  
ctg4272□ctg3680□ctg5025□WAG-99F9  
ctg4272□ctg3680□ctg5025□WAG-128D13  
ctg4273□□□WAG-29C13  
ctg4273□□□WAG-47O19  
ctg4273□ctg18□□WAG-54G23  
ctg4273□ctg18□ctg1190□WAG-34B16  
ctg4273□ctg18□ctg1190□WAG-70H12  
ctg4273□ctg18□ctg1190□WAG-95C11  
ctg4273□ctg18□ctg1190□WAG-121M23  
ctg4273□ctg18□ctg1190□WAG-121O15  
ctg4273□ctg4116□ctg4375□WAG-93J13  
ctg4273□ctg4116□ctg4375□WAG-117J9  
ctg4273□ctg6605□ctg20□WAG-8G17  
ctg4273□ctg6605□ctg20□WAG-20K5  
ctg4273□ctg6605□ctg20□WAG-29P8  
ctg4273□ctg6605□ctg20□WAG-33I21  
ctg4273□ctg6605□ctg20□WAG-37L11  
ctg4273□ctg6605□ctg20□WAG-66A8  
ctg4273□ctg6605□ctg20□WAG-77B15  
ctg4273□ctg6605□ctg20□WAG-77I5  
ctg4273□ctg6605□ctg20□WAG-102N23  
ctg4273□ctg6605□ctg20□WAG-114F19  
ctg4273□ctg6605□ctg20□WAG-116M18  
ctg4273□ctg6605□ctg20□WAG-120O5  
ctg4273□ctg6605□ctg20□WAG-121K10  
ctg4273□ctg6605□ctg20□WAG-121L10  
ctg4273□ctg6605□ctg20□WAG-123N16  
ctg4274□□□WAG-5B10  
ctg4274□□□WAG-27P11  
ctg4274□□□WAG-31N22  
ctg4274□□□WAG-45C13  
ctg4274□□□WAG-83B9  
ctg4274□□□WAG-108N20  
ctg4274□ctg1657□□WAG-8I12  
ctg4274□ctg1657□□WAG-59I20  
ctg4274□ctg1657□ctg2720□WAG-7G20  
ctg4274□ctg1657□ctg2720□WAG-45G19  
ctg4274□ctg1657□ctg2720□WAG-86M13  
ctg4274□ctg1962□ctg1801□WAG-49I12  
ctg4274□ctg1962□ctg1801□WAG-56I24  
ctg4274□ctg1962□ctg1801□WAG-62H23

ctg4274□ctg1962□ctg1801□WAG-88E6  
ctg4274□ctg1962□ctg1801□WAG-103C18  
ctg4274□ctg201□□WAG-69I14  
ctg4274□ctg201□□WAG-76L4  
ctg4274□ctg201□□WAG-121G14  
ctg4274□ctg201□ctg1235□WAG-10O13  
ctg4274□ctg201□ctg1235□WAG-29P12  
ctg4274□ctg201□ctg1235□WAG-34D22  
ctg4274□ctg201□ctg1235□WAG-117J17  
ctg4274□ctg201□ctg1235□WAG-127P13  
ctg4274□ctg201□ctg168□WAG-9H8  
ctg4274□ctg201□ctg168□WAG-11C14  
ctg4274□ctg201□ctg168□WAG-17M6  
ctg4274□ctg201□ctg168□WAG-26A23  
ctg4274□ctg201□ctg168□WAG-73J3  
ctg4274□ctg201□ctg168□WAG-88F24  
ctg4274□ctg201□ctg168□WAG-110E15  
ctg4274□ctg201□ctg168□WAG-115O13  
ctg4274□ctg201□ctg168□WAG-128M14  
ctg4274□ctg201□ctg168□WAG-130L3  
ctg4274□ctg2815□□WAG-46O5  
ctg4274□ctg2815□ctg3625□WAG-25L16  
ctg4274□ctg2815□ctg3625□WAG-57J19  
ctg4274□ctg2815□ctg3625□WAG-93H12  
ctg4275□□□WAG-9C2  
ctg4275□□□WAG-97P10  
ctg4275□ctg1716□ctg2113□WAG-33P11  
ctg4275□ctg1716□ctg2113□WAG-87G1  
ctg4275□ctg1716□ctg2113□WAG-109H23  
ctg4275□ctg1716□ctg2113□WAG-122L16  
ctg4275□ctg1716□ctg3708□WAG-34P2  
ctg4275□ctg1716□ctg3708□WAG-101L6  
ctg4275□ctg1716□ctg3708□WAG-107L4  
ctg4275□ctg1843□□WAG-30G18  
ctg4275□ctg1843□□WAG-120C3  
ctg4275□ctg1843□ctg2915□WAG-14D20  
ctg4275□ctg1843□ctg2915□WAG-56E4  
ctg4275□ctg1843□ctg2915□WAG-80M10  
ctg4275□ctg1843□ctg6427□WAG-23I7  
ctg4275□ctg1843□ctg6427□WAG-47P1  
ctg4275□ctg3459□□WAG-117P16  
ctg4275□ctg3459□ctg4658□WAG-24P3  
ctg4275□ctg3459□ctg4658□WAG-48O16  
ctg4276□ctg1991□ctg3206□WAG-47E16  
ctg4276□ctg1991□ctg3206□WAG-56C1  
ctg4276□ctg1991□ctg3206□WAG-91A11  
ctg4276□ctg1991□ctg3206□WAG-124H15  
ctg4276□ctg1991□ctg6347□WAG-2H5  
ctg4276□ctg1991□ctg6347□WAG-13K14  
ctg4277□□□WAG-8D24  
ctg4277□□□WAG-45D20  
ctg4277□□□WAG-67D16  
ctg4277□□□WAG-104B2  
ctg4277□ctg1048□□WAG-60E2  
ctg4277□ctg1048□□WAG-95C18  
ctg4277□ctg1048□ctg3218□WAG-16E19



ctg4277□ctg1048□ctg3218□WAG-74D11  
ctg4277□ctg1048□ctg3218□WAG-122F20  
ctg4277□ctg1048□ctg883□WAG-44H9  
ctg4277□ctg1048□ctg883□WAG-56A12  
ctg4277□ctg1048□ctg883□WAG-59E1  
ctg4277□ctg1048□ctg883□WAG-64K9  
ctg4277□ctg1048□ctg883□WAG-102B24  
ctg4277□ctg1939□□WAG-59F24  
ctg4277□ctg1939□□WAG-59L12  
ctg4277□ctg1939□ctg1778□WAG-2A14  
ctg4277□ctg1939□ctg1778□WAG-2N15  
ctg4277□ctg1939□ctg1778□WAG-17J6  
ctg4277□ctg1939□ctg1778□WAG-62P13  
ctg4277□ctg1939□ctg1778□WAG-79O6  
ctg4277□ctg1939□ctg1778□WAG-106O20  
ctg4277□ctg1939□ctg1778□WAG-114G18  
ctg4277□ctg481□□WAG-74N13  
ctg4277□ctg481□ctg490□WAG-7J11  
ctg4277□ctg481□ctg490□WAG-11K18  
ctg4277□ctg481□ctg490□WAG-16F3  
ctg4277□ctg481□ctg490□WAG-35F19  
ctg4277□ctg481□ctg490□WAG-41I12  
ctg4277□ctg481□ctg490□WAG-50I2  
ctg4277□ctg481□ctg490□WAG-65K8  
ctg4277□ctg481□ctg490□WAG-80B21  
ctg4277□ctg481□ctg490□WAG-122D3  
ctg4278□ctg1584□□WAG-93G16  
ctg4278□ctg1584□ctg1430□WAG-56D3  
ctg4278□ctg1584□ctg1430□WAG-75B9  
ctg4278□ctg1584□ctg1430□WAG-86H14  
ctg4278□ctg1584□ctg1430□WAG-92A18  
ctg4278□ctg1584□ctg1430□WAG-118B13  
ctg4278□ctg1584□ctg1430□WAG-121L16  
ctg4278□ctg1584□ctg4119□WAG-33L9  
ctg4278□ctg1584□ctg4119□WAG-78F24  
ctg4278□ctg1584□ctg4119□WAG-115C15  
ctg4279□ctg1529□ctg1822□WAG-14K4  
ctg4279□ctg1529□ctg1822□WAG-26G8  
ctg4279□ctg1529□ctg1822□WAG-110H24  
ctg4279□ctg1529□ctg1822□WAG-111C24  
ctg4279□ctg1529□ctg6484□WAG-19D22  
ctg4279□ctg1529□ctg6484□WAG-67B11  
ctg428□□□WAG-79L16  
ctg428□ctg991□□WAG-5L12  
ctg428□ctg991□□WAG-47N4  
ctg428□ctg991□ctg837□WAG-18P20  
ctg428□ctg991□ctg837□WAG-38H19  
ctg428□ctg991□ctg837□WAG-76H17  
ctg428□ctg991□ctg837□WAG-119O11  
ctg428□ctg991□ctg837□WAG-121M21  
ctg4280□□□WAG-7G2  
ctg4280□□□WAG-111M22  
ctg4280□ctg1339□ctg1511□WAG-37L8  
ctg4280□ctg1339□ctg1511□WAG-49L14  
ctg4280□ctg1339□ctg1511□WAG-111K22  
ctg4280□ctg1339□ctg1511□WAG-111L20

ctg4280□ctg1339□ctg1511□WAG-111L22  
ctg4280□ctg4171□ctg4406□WAG-39B7  
ctg4280□ctg4171□ctg4406□WAG-107K12  
ctg4281□□□WAG-80L5  
ctg4281□ctg2142□□WAG-54A9  
ctg4281□ctg2142□ctg2020□WAG-10H14  
ctg4281□ctg2142□ctg2020□WAG-65P24  
ctg4281□ctg2142□ctg2020□WAG-71A4  
ctg4281□ctg2142□ctg2020□WAG-114E17  
ctg4281□ctg4070□□WAG-104C19  
ctg4281□ctg4070□ctg5617□WAG-6I9  
ctg4281□ctg4070□ctg5617□WAG-121I8  
ctg4282□□□WAG-18I17  
ctg4282□□□WAG-55P15  
ctg4282□ctg1403□ctg1255□WAG-6N7  
ctg4282□ctg1403□ctg1255□WAG-17E18  
ctg4282□ctg1403□ctg1255□WAG-24P11  
ctg4282□ctg1403□ctg1255□WAG-41L9  
ctg4282□ctg1403□ctg1255□WAG-108D5  
ctg4282□ctg1415□ctg1262□WAG-7B6  
ctg4282□ctg1415□ctg1262□WAG-75G14  
ctg4282□ctg1415□ctg1262□WAG-78I9  
ctg4282□ctg1415□ctg1262□WAG-118M8  
ctg4282□ctg1689□ctg1541□WAG-17E23  
ctg4282□ctg1689□ctg1541□WAG-23N12  
ctg4282□ctg1689□ctg1541□WAG-89P2  
ctg4282□ctg1689□ctg1541□WAG-91N2  
ctg4282□ctg1689□ctg1541□WAG-127E10  
ctg4282□ctg2092□ctg2567□WAG-16J6  
ctg4282□ctg2092□ctg2567□WAG-69H12  
ctg4282□ctg2092□ctg2567□WAG-123A18  
ctg4282□ctg2092□ctg3430□WAG-66K23  
ctg4282□ctg2092□ctg3430□WAG-83M20  
ctg4282□ctg3234□ctg3269□WAG-7J10  
ctg4282□ctg3234□ctg3269□WAG-58B10  
ctg4282□ctg3234□ctg3269□WAG-98H9  
ctg4283□ctg3401□ctg3579□WAG-25M18  
ctg4283□ctg3401□ctg3579□WAG-45I11  
ctg4283□ctg3401□ctg3579□WAG-101C21  
ctg4283□ctg5761□□WAG-88D1  
ctg4283□ctg5761□□WAG-107L14  
ctg4284□□□WAG-13C23  
ctg4284□□□WAG-86K13  
ctg4284□□□WAG-107J9  
ctg4284□ctg3118□□WAG-80G6  
ctg4284□ctg3118□□WAG-87H16  
ctg4284□ctg3118□ctg4240□WAG-27B20  
ctg4284□ctg3118□ctg4240□WAG-27D15  
ctg4284□ctg3118□ctg4240□WAG-101G9  
ctg4284□ctg3118□ctg4240□WAG-105F15  
ctg4284□ctg3889□□WAG-51J4  
ctg4284□ctg3889□□WAG-73K14  
ctg4284□ctg3889□ctg5220□WAG-K14  
ctg4284□ctg3889□ctg5220□WAG-67I11  
ctg4284□ctg986□□WAG-94F18  
ctg4284□ctg986□ctg1141□WAG-22P13

ctg4284□ctg986□ctg1141□WAG-25E14  
ctg4284□ctg986□ctg1141□WAG-71B17  
ctg4284□ctg986□ctg1141□WAG-94P18  
ctg4284□ctg986□ctg1141□WAG-110G1  
ctg4284□ctg986□ctg1141□WAG-113N16  
ctg4284□ctg986□ctg1141□WAG-128I12  
ctg4285□ctg2793□□WAG-57A5  
ctg4285□ctg2793□ctg3742□WAG-29M17  
ctg4285□ctg2793□ctg3742□WAG-123N8  
ctg4285□ctg860□□WAG-43P11  
ctg4285□ctg860□ctg1992□WAG-13A17  
ctg4285□ctg860□ctg1992□WAG-61A13  
ctg4285□ctg860□ctg1992□WAG-64K1  
ctg4285□ctg860□ctg1992□WAG-78C20  
ctg4285□ctg860□ctg1992□WAG-93K9  
ctg4285□ctg860□ctg1992□WAG-119H11  
ctg4285□ctg860□ctg4245□WAG-87H22  
ctg4285□ctg860□ctg4245□WAG-89C18  
ctg4285□ctg860□ctg4724□WAG-6A23  
ctg4285□ctg860□ctg4724□WAG-33E2  
ctg4286□ctg1090□ctg930□WAG-62K7  
ctg4286□ctg1090□ctg930□WAG-68P1  
ctg4286□ctg1090□ctg930□WAG-88L15  
ctg4286□ctg1090□ctg930□WAG-93K10  
ctg4286□ctg2421□ctg2329□WAG-55B3  
ctg4286□ctg2421□ctg2329□WAG-95E14  
ctg4286□ctg2421□ctg2329□WAG-118N6  
ctg4286□ctg5651□ctg6817□WAG-16H1  
ctg4286□ctg5651□ctg6817□WAG-16J23  
ctg4286□ctg577□ctg787□WAG-1D21  
ctg4286□ctg577□ctg787□WAG-2E6  
ctg4286□ctg577□ctg787□WAG-22P7  
ctg4286□ctg577□ctg787□WAG-50J5  
ctg4286□ctg577□ctg787□WAG-56F15  
ctg4286□ctg577□ctg787□WAG-84I19  
ctg4286□ctg577□ctg787□WAG-116M6  
ctg4286□ctg577□ctg787□WAG-118D5  
ctg4286□ctg577□ctg787□WAG-129J6  
ctg4287□□□WAG-2A20  
ctg4287□□□WAG-13G22  
ctg4287□□□WAG-94O18  
ctg4287□ctg2095□□WAG-64D6  
ctg4287□ctg2095□□WAG-78B22  
ctg4287□ctg2095□□WAG-83G4  
ctg4287□ctg2095□ctg3563□WAG-60C22  
ctg4287□ctg2095□ctg3563□WAG-89B11  
ctg4287□ctg2095□ctg3563□WAG-101E1  
ctg4287□ctg2856□□WAG-78N16  
ctg4287□ctg2856□□WAG-89D5  
ctg4287□ctg2856□ctg2847□WAG-69C10  
ctg4287□ctg2856□ctg2847□WAG-89P6  
ctg4287□ctg2856□ctg2847□WAG-98F19  
ctg4287□ctg2856□ctg3998□WAG-11J8  
ctg4287□ctg2856□ctg3998□WAG-78B7  
ctg4287□ctg2856□ctg3998□WAG-110K13  
ctg4287□ctg388□□WAG-2L14

ctg4287□ctg388□□WAG-25D18  
ctg4287□ctg388□□WAG-32F3  
ctg4287□ctg388□ctg343□WAG-18K16  
ctg4287□ctg388□ctg343□WAG-19C20  
ctg4287□ctg388□ctg343□WAG-51K15  
ctg4287□ctg388□ctg343□WAG-60K22  
ctg4287□ctg388□ctg343□WAG-69O4  
ctg4287□ctg388□ctg343□WAG-80K7  
ctg4287□ctg388□ctg343□WAG-86J4  
ctg4287□ctg388□ctg343□WAG-88F11  
ctg4287□ctg388□ctg343□WAG-97J24  
ctg4287□ctg388□ctg343□WAG-99A23  
ctg4287□ctg388□ctg343□WAG-99L6  
ctg4287□ctg388□ctg343□WAG-115G8  
ctg4287□ctg388□ctg343□WAG-120C21  
ctg4287□ctg388□ctg343□WAG-120J9  
ctg4287□ctg388□ctg343□WAG-128C4  
ctg4287□ctg789□□WAG-46O10  
ctg4287□ctg789□□WAG-97I6  
ctg4287□ctg789□□WAG-118L19  
ctg4287□ctg789□ctg1379□WAG-11D16  
ctg4287□ctg789□ctg1379□WAG-15G19  
ctg4287□ctg789□ctg1379□WAG-36L4  
ctg4287□ctg789□ctg1379□WAG-80D13  
ctg4287□ctg789□ctg1379□WAG-80G22  
ctg4287□ctg789□ctg1379□WAG-90I6  
ctg4287□ctg789□ctg1379□WAG-113I5  
ctg4287□ctg789□ctg1379□WAG-122I5  
ctg4288□□□WAG-6B3  
ctg4288□ctg288□□WAG-17D21  
ctg4288□ctg288□ctg325□WAG-49K9  
ctg4288□ctg288□ctg325□WAG-51G16  
ctg4288□ctg288□ctg325□WAG-69L8  
ctg4288□ctg288□ctg325□WAG-84E24  
ctg4288□ctg288□ctg325□WAG-91B4  
ctg4288□ctg288□ctg325□WAG-103D11  
ctg4288□ctg288□ctg325□WAG-120I13  
ctg4288□ctg288□ctg325□WAG-123E23  
ctg4289□□□WAG-9C1  
ctg4289□□□WAG-71O7  
ctg4289□□□WAG-91D5  
ctg4289□□□WAG-101I24  
ctg4289□ctg2279□□WAG-117B22  
ctg4289□ctg2279□ctg2183□WAG-79G24  
ctg4289□ctg2279□ctg2183□WAG-91K14  
ctg4289□ctg2279□ctg2183□WAG-93D6  
ctg4289□ctg2279□ctg2183□WAG-121D2  
ctg4289□ctg415□□WAG-35O21  
ctg4289□ctg415□□WAG-125A2  
ctg4289□ctg415□ctg341□WAG-2J4  
ctg4289□ctg415□ctg341□WAG-7N4  
ctg4289□ctg415□ctg341□WAG-15N11  
ctg4289□ctg415□ctg341□WAG-21F8  
ctg4289□ctg415□ctg341□WAG-67M13  
ctg4289□ctg415□ctg341□WAG-95J11  
ctg4289□ctg415□ctg341□WAG-117G16

ctg4289□ctg415□ctg341□WAG-120C9  
ctg4289□ctg415□ctg341□WAG-130O18  
ctg4289□ctg6017□□WAG-13J6  
ctg4289□ctg6017□□WAG-129H22  
ctg4289□ctg822□□WAG-7I8  
ctg4289□ctg822□□WAG-81J4  
ctg4289□ctg822□□WAG-88E21  
ctg4289□ctg822□ctg672□WAG-24A11  
ctg4289□ctg822□ctg672□WAG-41J5  
ctg4289□ctg822□ctg672□WAG-69C15  
ctg4289□ctg822□ctg672□WAG-72J22  
ctg4289□ctg822□ctg672□WAG-106D16  
ctg4289□ctg822□ctg672□WAG-107D21  
ctg4289□ctg822□ctg672□WAG-122P8  
ctg429□□□WAG-84K6  
ctg429□ctg995□ctg1510□WAG-75L14  
ctg429□ctg995□ctg1510□WAG-75M21  
ctg429□ctg995□ctg1510□WAG-76F2  
ctg429□ctg995□ctg1510□WAG-98K13  
ctg429□ctg995□ctg1510□WAG-116B17  
ctg429□ctg995□ctg1510□WAG-120O14  
ctg429□ctg995□ctg1510□WAG-127G4  
ctg429□ctg995□ctg3404□WAG-61F11  
ctg429□ctg995□ctg3404□WAG-112G6  
ctg429□ctg995□ctg3404□WAG-118A15  
ctg4290□□□WAG-25O16  
ctg4290□ctg127□ctg102□WAG-7E20  
ctg4290□ctg127□ctg102□WAG-13B16  
ctg4290□ctg127□ctg102□WAG-78M9  
ctg4290□ctg127□ctg102□WAG-83G20  
ctg4290□ctg127□ctg102□WAG-100H8  
ctg4290□ctg127□ctg102□WAG-112B17  
ctg4290□ctg127□ctg102□WAG-112O14  
ctg4290□ctg127□ctg102□WAG-122L9  
ctg4290□ctg5013□ctg5492□WAG-38O17  
ctg4290□ctg5013□ctg5492□WAG-119I12  
ctg4290□ctg887□□WAG-23G11  
ctg4290□ctg887□ctg964□WAG-7I19  
ctg4290□ctg887□ctg964□WAG-20E13  
ctg4290□ctg887□ctg964□WAG-24J24  
ctg4290□ctg887□ctg964□WAG-31B13  
ctg4290□ctg887□ctg964□WAG-31G19  
ctg4290□ctg887□ctg964□WAG-39D21  
ctg4290□ctg887□ctg964□WAG-45K21  
ctg4290□ctg887□ctg964□WAG-79J20  
ctg4290□ctg916□□WAG-49O1  
ctg4290□ctg916□ctg3876□WAG-26J9  
ctg4290□ctg916□ctg3876□WAG-47D22  
ctg4290□ctg916□ctg3876□WAG-107O5  
ctg4290□ctg916□ctg6382□WAG-95M23  
ctg4290□ctg916□ctg6382□WAG-102H19  
ctg4290□ctg916□ctg969□WAG-4K13  
ctg4290□ctg916□ctg969□WAG-30G14  
ctg4290□ctg916□ctg969□WAG-47D14  
ctg4290□ctg916□ctg969□WAG-59H20  
ctg4290□ctg916□ctg969□WAG-73K16

ctg4290□ctg916□ctg969□WAG-96H11  
ctg4291□ctg144□ctg113□WAG-2G12  
ctg4291□ctg144□ctg113□WAG-26J3  
ctg4291□ctg144□ctg113□WAG-30H21  
ctg4291□ctg144□ctg113□WAG-53N4  
ctg4291□ctg144□ctg113□WAG-73M19  
ctg4291□ctg144□ctg113□WAG-95A13  
ctg4291□ctg144□ctg113□WAG-114B17  
ctg4291□ctg977□□WAG-29O11  
ctg4291□ctg977□□WAG-83P20  
ctg4291□ctg977□□WAG-110B16  
ctg4291□ctg977□□WAG-122G16  
ctg4291□ctg977□ctg1116□WAG-25L2  
ctg4291□ctg977□ctg1116□WAG-47D19  
ctg4291□ctg977□ctg1116□WAG-79M2  
ctg4291□ctg977□ctg1116□WAG-91C2  
ctg4291□ctg977□ctg1116□WAG-120I14  
ctg4291□ctg977□ctg1116□WAG-128I10  
ctg4291□ctg977□ctg1599□WAG-11O11  
ctg4291□ctg977□ctg1599□WAG-19K5  
ctg4291□ctg977□ctg1599□WAG-79N18  
ctg4291□ctg977□ctg1599□WAG-121L20  
ctg4291□ctg977□ctg1599□WAG-130H10  
ctg4292□□□WAG-84C21  
ctg4292□□□WAG-85J12  
ctg4292□ctg1803□□WAG-99C18  
ctg4292□ctg1803□ctg2216□WAG-79F8  
ctg4292□ctg1803□ctg2216□WAG-123H24  
ctg4292□ctg1803□ctg2216□WAG-127B20  
ctg4292□ctg6279□□WAG-7M14  
ctg4292□ctg6279□□WAG-124G12  
ctg4293□ctg1023□ctg1036□WAG-6D21  
ctg4293□ctg1023□ctg1036□WAG-12N10  
ctg4293□ctg1023□ctg1036□WAG-26B12  
ctg4293□ctg1023□ctg1036□WAG-35F9  
ctg4293□ctg1023□ctg1036□WAG-36P12  
ctg4293□ctg1023□ctg1036□WAG-58N12  
ctg4293□ctg1023□ctg1036□WAG-59G13  
ctg4293□ctg1023□ctg1036□WAG-68B22  
ctg4293□ctg1023□ctg1036□WAG-112D18  
ctg4293□ctg1023□ctg1036□WAG-120C10  
ctg4294□□□WAG-49N12  
ctg4294□□□WAG-86C24  
ctg4294□□□WAG-104K1  
ctg4295□□□WAG-32G5  
ctg4295□□□WAG-80F1  
ctg4295□□□WAG-102L14  
ctg4295□□□WAG-130K7  
ctg4295□ctg3505□ctg4771□WAG-37K11  
ctg4295□ctg3505□ctg4771□WAG-69P4  
ctg4295□ctg3505□ctg6885□WAG-38A14  
ctg4295□ctg3505□ctg6885□WAG-43O6  
ctg4295□ctg6087□□WAG-101E21  
ctg4295□ctg6087□□WAG-109K6  
ctg4296□□□WAG-17P23  
ctg4296□□□WAG-19I21

ctg4296□□□WAG-20G6  
ctg4296□□□WAG-39L14  
ctg4296□□□WAG-41L13  
ctg4296□□□WAG-44D15  
ctg4296□□□WAG-97F22  
ctg4296□ctg132□ctg181□WAG-24K11  
ctg4296□ctg132□ctg181□WAG-26B11  
ctg4296□ctg132□ctg181□WAG-35D17  
ctg4296□ctg132□ctg181□WAG-47D15  
ctg4296□ctg132□ctg181□WAG-53H24  
ctg4296□ctg132□ctg181□WAG-53L12  
ctg4296□ctg132□ctg181□WAG-64B15  
ctg4296□ctg132□ctg181□WAG-64G7  
ctg4296□ctg132□ctg181□WAG-68C9  
ctg4296□ctg132□ctg181□WAG-79K21  
ctg4296□ctg132□ctg181□WAG-79P6  
ctg4296□ctg132□ctg181□WAG-82J19  
ctg4296□ctg132□ctg181□WAG-108E23  
ctg4296□ctg132□ctg181□WAG-110D6  
ctg4296□ctg132□ctg181□WAG-114F9  
ctg4296□ctg132□ctg181□WAG-121F18  
ctg4296□ctg1441□ctg1289□WAG-58D22  
ctg4296□ctg1441□ctg1289□WAG-76N11  
ctg4296□ctg1441□ctg1289□WAG-99G19  
ctg4296□ctg1441□ctg1289□WAG-103C11  
ctg4296□ctg1441□ctg1289□WAG-106G10  
ctg4296□ctg1441□ctg1289□WAG-108N7  
ctg4296□ctg711□□WAG-23M9  
ctg4296□ctg711□□WAG-104M5  
ctg4296□ctg711□ctg2253□WAG-29A17  
ctg4296□ctg711□ctg2253□WAG-52A11  
ctg4296□ctg711□ctg2253□WAG-120J2  
ctg4296□ctg711□ctg956□WAG-9N17  
ctg4296□ctg711□ctg956□WAG-18G9  
ctg4296□ctg711□ctg956□WAG-29C2  
ctg4296□ctg711□ctg956□WAG-44L23  
ctg4296□ctg711□ctg956□WAG-106N7  
ctg4296□ctg711□ctg956□WAG-124G4  
ctg4297□ctg1261□□WAG-10H24  
ctg4297□ctg1261□□WAG-28K6  
ctg4297□ctg1261□□WAG-58B5  
ctg4297□ctg1261□ctg1859□WAG-32G8  
ctg4297□ctg1261□ctg1859□WAG-51E17  
ctg4297□ctg1261□ctg1859□WAG-64B17  
ctg4297□ctg1261□ctg1859□WAG-64F3  
ctg4297□ctg1261□ctg1859□WAG-71C19  
ctg4297□ctg6529□□WAG-54D16  
ctg4297□ctg6529□□WAG-120O21  
ctg4298□□□WAG-2I18  
ctg4298□□□WAG-69C21  
ctg4298□ctg1147□ctg1751□WAG-60L2  
ctg4298□ctg1147□ctg1751□WAG-73N14  
ctg4298□ctg1147□ctg1751□WAG-90G3  
ctg4298□ctg1147□ctg1751□WAG-97E8  
ctg4298□ctg1147□ctg2215□WAG-7E15  
ctg4298□ctg1147□ctg2215□WAG-10G2

ctg4298□ctg1147□ctg2215□WAG-24E13  
ctg4298□ctg1147□ctg2215□WAG-31P16  
ctg4298□ctg1147□ctg2215□WAG-34J19  
ctg4298□ctg1147□ctg2215□WAG-124N12  
ctg4299□□□WAG-21J13  
ctg4299□□□WAG-24G20  
ctg4299□□□WAG-97K19  
ctg4299□□□WAG-106F8  
ctg4299□ctg1192□□WAG-30D10  
ctg4299□ctg1192□ctg1685□WAG-25I18  
ctg4299□ctg1192□ctg1685□WAG-41O9  
ctg4299□ctg1192□ctg1685□WAG-48F20  
ctg4299□ctg1192□ctg1685□WAG-70K23  
ctg4299□ctg1192□ctg1685□WAG-90F14  
ctg4299□ctg1192□ctg1685□WAG-101N14  
ctg4299□ctg1192□ctg1685□WAG-113C4  
ctg4299□ctg1192□ctg2197□WAG-5C9  
ctg4299□ctg1192□ctg2197□WAG-42J22  
ctg4299□ctg1192□ctg2197□WAG-76A10  
ctg4299□ctg1192□ctg2197□WAG-102A9  
ctg4299□ctg1192□ctg2197□WAG-110E18  
ctg4299□ctg1192□ctg2197□WAG-122B23  
ctg4299□ctg1192□ctg2197□WAG-124L19  
ctg4299□ctg1192□ctg2748□WAG-42B19  
ctg4299□ctg1192□ctg2748□WAG-107H1  
ctg4299□ctg1192□ctg2748□WAG-107P3  
ctg4299□ctg1399□□WAG-17D24  
ctg4299□ctg1399□ctg1576□WAG-29N10  
ctg4299□ctg1399□ctg1576□WAG-75J8  
ctg4299□ctg1399□ctg1576□WAG-78E20  
ctg4299□ctg1399□ctg1576□WAG-123P4  
ctg4299□ctg1399□ctg1576□WAG-127G22  
ctg4299□ctg5987□□WAG-13P12  
ctg4299□ctg5987□□WAG-38O12  
ctg4299□ctg6476□□WAG-41A1  
ctg4299□ctg6476□□WAG-74F3  
ctg43□□□WAG-80J2  
ctg43□ctg1079□□WAG-6N13  
ctg43□ctg1079□ctg2135□WAG-13K9  
ctg43□ctg1079□ctg2135□WAG-23G9  
ctg43□ctg1079□ctg2135□WAG-52F13  
ctg43□ctg1079□ctg2135□WAG-69E4  
ctg43□ctg1079□ctg2135□WAG-80L12  
ctg43□ctg1079□ctg2135□WAG-98J8  
ctg43□ctg1079□ctg2135□WAG-108L11  
ctg43□ctg1079□ctg2411□WAG-65O2  
ctg43□ctg1079□ctg2411□WAG-119I20  
ctg43□ctg1079□ctg2411□WAG-126N24  
ctg43□ctg1079□ctg3573□WAG-22G24  
ctg43□ctg1079□ctg3573□WAG-46C20  
ctg43□ctg1079□ctg3573□WAG-66N9  
ctg43□ctg5224□ctg5980□WAG-28E13  
ctg43□ctg5224□ctg5980□WAG-116M7  
ctg43□ctg5327□ctg6218□WAG-37M15  
ctg43□ctg5327□ctg6218□WAG-48P2  
ctg430□□□WAG-73E12



ctg430□ctg1459□□WAG-120B19  
ctg430□ctg1459□ctg1309□WAG-51C9  
ctg430□ctg1459□ctg1309□WAG-56H1  
ctg430□ctg1459□ctg1309□WAG-88H1  
ctg430□ctg1459□ctg1309□WAG-112C22  
ctg430□ctg1459□ctg3728□WAG-51O4  
ctg430□ctg1459□ctg3728□WAG-118K21  
ctg430□ctg1459□ctg3728□WAG-127D14  
ctg430□ctg2559□ctg2493□WAG-65K15  
ctg430□ctg2559□ctg2493□WAG-66H21  
ctg430□ctg2559□ctg2493□WAG-92E8  
ctg4300□ctg6296□□WAG-60G15  
ctg4300□ctg6296□□WAG-90P16  
ctg4301□□□WAG-58E4  
ctg4301□□□WAG-60J11  
ctg4301□ctg4400□□WAG-9E7  
ctg4301□ctg4400□□WAG-27B24  
ctg4301□ctg4400□ctg6642□WAG-59M13  
ctg4301□ctg4400□ctg6642□WAG-66H15  
ctg4301□ctg4516□ctg4645□WAG-75F19  
ctg4301□ctg4516□ctg4645□WAG-108K6  
ctg4301□ctg6239□□WAG-81O18  
ctg4301□ctg6239□□WAG-81P7  
ctg4302□ctg2541□□WAG-45G12  
ctg4302□ctg2541□□WAG-97I12  
ctg4302□ctg2541□ctg5230□WAG-29H1  
ctg4302□ctg2541□ctg5230□WAG-96C18  
ctg4302□ctg2541□ctg6562□WAG-53M5  
ctg4302□ctg2541□ctg6562□WAG-59J21  
ctg4302□ctg6200□□WAG-15E11  
ctg4302□ctg6200□□WAG-44E8  
ctg4303□ctg1804□ctg2217□WAG-18D24  
ctg4303□ctg1804□ctg2217□WAG-61J8  
ctg4303□ctg1804□ctg2217□WAG-72I8  
ctg4303□ctg1804□ctg2217□WAG-90L8  
ctg4303□ctg1804□ctg2217□WAG-108E18  
ctg4303□ctg6196□□WAG-36D24  
ctg4303□ctg6196□□WAG-48B12  
ctg4303□ctg742□ctg887□WAG-8G10  
ctg4303□ctg742□ctg887□WAG-55A23  
ctg4303□ctg742□ctg887□WAG-63P9  
ctg4303□ctg742□ctg887□WAG-87P22  
ctg4303□ctg742□ctg887□WAG-89G4  
ctg4303□ctg742□ctg887□WAG-93K3  
ctg4303□ctg742□ctg887□WAG-97G24  
ctg4304□□□WAG-10B15  
ctg4304□□□WAG-117C18  
ctg4304□ctg1931□ctg1769□WAG-35H13  
ctg4304□ctg1931□ctg1769□WAG-39D5  
ctg4304□ctg1931□ctg1769□WAG-46P12  
ctg4304□ctg1931□ctg1769□WAG-61C23  
ctg4304□ctg1931□ctg1769□WAG-91H15  
ctg4304□ctg1931□ctg1769□WAG-104P15  
ctg4304□ctg6101□□WAG-33H11  
ctg4304□ctg6101□□WAG-35C13  
ctg4305□ctg5888□□WAG-108C15

ctg4305□ctg5888□□WAG-129H17  
ctg4306□ctg5789□□WAG-85A17  
ctg4306□ctg5789□□WAG-122A14  
ctg4306□ctg5867□□WAG-26G1  
ctg4306□ctg5867□□WAG-53E21  
ctg4307□ctg5795□□WAG-4K12  
ctg4307□ctg5795□□WAG-104L15  
ctg4308□□□WAG-39C7  
ctg4308□□□WAG-105H1  
ctg4308□ctg1250□ctg2323□WAG-15I6  
ctg4308□ctg1250□ctg2323□WAG-69G7  
ctg4308□ctg1250□ctg2323□WAG-72P7  
ctg4308□ctg1250□ctg2323□WAG-76D19  
ctg4308□ctg1250□ctg2323□WAG-104E22  
ctg4308□ctg1250□ctg2323□WAG-125D16  
ctg4308□ctg152□□WAG-39C9  
ctg4308□ctg152□□WAG-93O2  
ctg4308□ctg152□ctg161□WAG-4M6  
ctg4308□ctg152□ctg161□WAG-38P20  
ctg4308□ctg152□ctg161□WAG-39P5  
ctg4308□ctg152□ctg161□WAG-42N2  
ctg4308□ctg152□ctg161□WAG-55B17  
ctg4308□ctg152□ctg161□WAG-57K2  
ctg4308□ctg152□ctg161□WAG-57O7  
ctg4308□ctg152□ctg161□WAG-61J12  
ctg4308□ctg152□ctg161□WAG-92F9  
ctg4308□ctg152□ctg161□WAG-122C6  
ctg4308□ctg152□ctg161□WAG-125F1  
ctg4308□ctg152□ctg161□WAG-126A7  
ctg4308□ctg152□ctg161□WAG-129D23  
ctg4308□ctg152□ctg161□WAG-130C2  
ctg4308□ctg152□ctg1805□WAG-58D23  
ctg4308□ctg152□ctg1805□WAG-59M5  
ctg4308□ctg152□ctg1805□WAG-68H1  
ctg4308□ctg152□ctg1805□WAG-101B8  
ctg4308□ctg5635□□WAG-91M22  
ctg4308□ctg5635□□WAG-112H1  
ctg4309□ctg2865□ctg2853□WAG-37G2  
ctg4309□ctg2865□ctg2853□WAG-66F5  
ctg4309□ctg2865□ctg2853□WAG-90I18  
ctg4309□ctg4943□ctg5309□WAG-31M17  
ctg4309□ctg4943□ctg5309□WAG-44E18  
ctg4309□ctg89□□WAG-5O2  
ctg4309□ctg89□□WAG-32B14  
ctg4309□ctg89□□WAG-101E18  
ctg4309□ctg89□ctg752□WAG-8F17  
ctg4309□ctg89□ctg752□WAG-25L5  
ctg4309□ctg89□ctg752□WAG-44O1  
ctg4309□ctg89□ctg752□WAG-84E15  
ctg4309□ctg89□ctg752□WAG-86O9  
ctg4309□ctg89□ctg752□WAG-98O7  
ctg4309□ctg89□ctg752□WAG-101O11  
ctg4309□ctg89□ctg752□WAG-109P15  
ctg4309□ctg89□ctg752□WAG-110B2  
ctg4309□ctg89□ctg752□WAG-118J9  
ctg4309□ctg89□ctg752□WAG-123C10

ctg4309□ctg89□ctg752□WAG-125A24  
ctg4309□ctg89□ctg91□WAG-5H9  
ctg4309□ctg89□ctg91□WAG-15C16  
ctg4309□ctg89□ctg91□WAG-25E3  
ctg4309□ctg89□ctg91□WAG-28H11  
ctg4309□ctg89□ctg91□WAG-41D4  
ctg4309□ctg89□ctg91□WAG-62F9  
ctg4309□ctg89□ctg91□WAG-66L4  
ctg4309□ctg89□ctg91□WAG-77L13  
ctg4309□ctg89□ctg91□WAG-82C4  
ctg4309□ctg89□ctg91□WAG-92J17  
ctg4309□ctg89□ctg91□WAG-125G18  
ctg431□□□WAG-10L8  
ctg431□□□WAG-27G2  
ctg431□□□WAG-39D10  
ctg431□□□WAG-98O23  
ctg431□□□WAG-101C24  
ctg431□ctg1382□□WAG-2A22  
ctg431□ctg1382□□WAG-22M10  
ctg431□ctg1382□ctg1609□WAG-87F13  
ctg431□ctg1382□ctg1609□WAG-87F14  
ctg431□ctg1382□ctg1609□WAG-95J9  
ctg431□ctg1382□ctg1609□WAG-115J10  
ctg431□ctg1382□ctg4023□WAG-53F6  
ctg431□ctg1382□ctg4023□WAG-68N24  
ctg431□ctg1382□ctg4023□WAG-79H16  
ctg431□ctg1382□ctg4023□WAG-80H14  
ctg431□ctg1382□ctg4023□WAG-114J1  
ctg431□ctg1868□ctg2209□WAG-26G6  
ctg431□ctg1868□ctg2209□WAG-49E16  
ctg431□ctg1868□ctg2209□WAG-66H9  
ctg431□ctg1868□ctg2209□WAG-129B24  
ctg431□ctg1868□ctg6344□WAG-18I16  
ctg431□ctg1868□ctg6344□WAG-18M11  
ctg4310□□□WAG-85J5  
ctg4310□□□WAG-91N15  
ctg4310□ctg2037□□WAG-43G19  
ctg4310□ctg2037□□WAG-89L12  
ctg4310□ctg2037□ctg2584□WAG-19L1  
ctg4310□ctg2037□ctg2584□WAG-25L4  
ctg4310□ctg2037□ctg2584□WAG-51K24  
ctg4310□ctg2037□ctg2584□WAG-118F18  
ctg4310□ctg2037□ctg2584□WAG-121C6  
ctg4310□ctg5595□ctg6760□WAG-22L21  
ctg4310□ctg5595□ctg6760□WAG-45P23  
ctg4310□ctg6164□□WAG-2J2  
ctg4310□ctg6164□□WAG-81M23  
ctg4310□ctg98□□WAG-29C6  
ctg4310□ctg98□□WAG-48J13  
ctg4310□ctg98□□WAG-66F4  
ctg4310□ctg98□ctg89□WAG-25A9  
ctg4310□ctg98□ctg89□WAG-29M3  
ctg4310□ctg98□ctg89□WAG-38P16  
ctg4310□ctg98□ctg89□WAG-41L2  
ctg4310□ctg98□ctg89□WAG-51L12  
ctg4310□ctg98□ctg89□WAG-77F5

ctg4310□ctg98□ctg89□WAG-82P10  
ctg4310□ctg98□ctg89□WAG-89A22  
ctg4310□ctg98□ctg89□WAG-89N1  
ctg4310□ctg98□ctg89□WAG-103O6  
ctg4310□ctg98□ctg89□WAG-124D9  
ctg4310□ctg98□ctg89□WAG-130I17  
ctg4311□ctg5408□ctg6413□WAG-13B10  
ctg4311□ctg5408□ctg6413□WAG-51H20  
ctg4312□ctg1393□ctg2016□WAG-68C6  
ctg4312□ctg1393□ctg2016□WAG-98I17  
ctg4312□ctg1393□ctg2016□WAG-100I1  
ctg4312□ctg1393□ctg2016□WAG-104A18  
ctg4312□ctg1393□ctg2016□WAG-105E22  
ctg4312□ctg1393□ctg2016□WAG-113G6  
ctg4312□ctg1393□ctg5262□WAG-17O21  
ctg4312□ctg1393□ctg5262□WAG-130C8  
ctg4312□ctg1393□ctg5912□WAG-77I13  
ctg4312□ctg1393□ctg5912□WAG-79B20  
ctg4312□ctg5377□ctg6335□WAG-42P14  
ctg4312□ctg5377□ctg6335□WAG-92L7  
ctg4313□ctg5357□ctg6291□WAG-11E8  
ctg4313□ctg5357□ctg6291□WAG-55O23  
ctg4314□ctg5335□ctg6237□WAG-52M12  
ctg4314□ctg5335□ctg6237□WAG-62A5  
ctg4315□□□WAG-55E16  
ctg4315□□□WAG-69E1  
ctg4315□□□WAG-119H12  
ctg4315□ctg3107□ctg3297□WAG-60E24  
ctg4315□ctg3107□ctg3297□WAG-84A17  
ctg4315□ctg3107□ctg3297□WAG-95J23  
ctg4315□ctg3107□ctg3297□WAG-111H4  
ctg4315□ctg5311□ctg6184□WAG-16B23  
ctg4315□ctg5311□ctg6184□WAG-73H9  
ctg4315□ctg5654□ctg6818□WAG-32C12  
ctg4315□ctg5654□ctg6818□WAG-127J23  
ctg4316□□□WAG-33B13  
ctg4316□□□WAG-84O17  
ctg4316□ctg5101□ctg5691□WAG-19B19  
ctg4316□ctg5101□ctg5691□WAG-30B21  
ctg4316□ctg92□□WAG-23E1  
ctg4316□ctg92□□WAG-43B8  
ctg4316□ctg92□□WAG-67G15  
ctg4316□ctg92□ctg262□WAG-4D20  
ctg4316□ctg92□ctg262□WAG-5E3  
ctg4316□ctg92□ctg262□WAG-11H16  
ctg4316□ctg92□ctg262□WAG-22I14  
ctg4316□ctg92□ctg262□WAG-28I9  
ctg4316□ctg92□ctg262□WAG-51L1  
ctg4316□ctg92□ctg262□WAG-68C17  
ctg4316□ctg92□ctg262□WAG-80B17  
ctg4316□ctg92□ctg262□WAG-82G16  
ctg4316□ctg92□ctg262□WAG-123A12  
ctg4316□ctg92□ctg262□WAG-127F17  
ctg4316□ctg92□ctg5850□WAG-80N19  
ctg4316□ctg92□ctg5850□WAG-91P5  
ctg4316□ctg92□ctg85□WAG-21E20

ctg4316□ctg92□ctg85□WAG-28M18  
ctg4316□ctg92□ctg85□WAG-36G6  
ctg4316□ctg92□ctg85□WAG-37D5  
ctg4316□ctg92□ctg85□WAG-49N16  
ctg4316□ctg92□ctg85□WAG-62I6  
ctg4316□ctg92□ctg85□WAG-63B8  
ctg4316□ctg92□ctg85□WAG-70O1  
ctg4316□ctg92□ctg85□WAG-74M19  
ctg4316□ctg92□ctg85□WAG-92J7  
ctg4316□ctg92□ctg85□WAG-93M22  
ctg4316□ctg92□ctg85□WAG-98A11  
ctg4316□ctg92□ctg85□WAG-108E6  
ctg4316□ctg92□ctg85□WAG-110J3  
ctg4316□ctg92□ctg85□WAG-126I24  
ctg4316□ctg92□ctg85□WAG-130A19  
ctg4317□□□WAG-4K4  
ctg4317□□□WAG-37H11  
ctg4317□□□WAG-42F1  
ctg4317□□□WAG-44H6  
ctg4317□ctg2301□ctg2200□WAG-65H14  
ctg4317□ctg2301□ctg2200□WAG-89M21  
ctg4317□ctg2301□ctg2200□WAG-115N10  
ctg4317□ctg2301□ctg2200□WAG-122E23  
ctg4317□ctg2540□ctg2803□WAG-28A12  
ctg4317□ctg2540□ctg2803□WAG-46O1  
ctg4317□ctg2540□ctg2803□WAG-88P20  
ctg4317□ctg2540□ctg4038□WAG-8J14  
ctg4317□ctg2540□ctg4038□WAG-103C4  
ctg4317□ctg2540□ctg4038□WAG-109K5  
ctg4318□ctg5038□ctg5545□WAG-96F11  
ctg4318□ctg5038□ctg5545□WAG-119C15  
ctg4319□ctg5036□ctg5540□WAG-61N5  
ctg4319□ctg5036□ctg5540□WAG-109F3  
ctg432□□□WAG-103P22  
ctg432□□□WAG-117A9  
ctg432□ctg999□□WAG-13M1  
ctg432□ctg999□□WAG-54N11  
ctg432□ctg999□□WAG-92O10  
ctg432□ctg999□ctg2024□WAG-54F15  
ctg432□ctg999□ctg2024□WAG-55C10  
ctg432□ctg999□ctg2024□WAG-75C19  
ctg432□ctg999□ctg2024□WAG-98F14  
ctg4320□ctg5032□ctg5529□WAG-26O3  
ctg4320□ctg5032□ctg5529□WAG-127N15  
ctg4320□ctg632□ctg518□WAG-35J15  
ctg4320□ctg632□ctg518□WAG-36I18  
ctg4320□ctg632□ctg518□WAG-36P11  
ctg4320□ctg632□ctg518□WAG-71J21  
ctg4320□ctg632□ctg518□WAG-71K21  
ctg4320□ctg632□ctg518□WAG-84H19  
ctg4320□ctg632□ctg518□WAG-89F1  
ctg4320□ctg632□ctg518□WAG-90J24  
ctg4320□ctg632□ctg518□WAG-111A17  
ctg4320□ctg632□ctg518□WAG-120L3  
ctg4321□ctg3096□ctg3094□WAG-22P4  
ctg4321□ctg3096□ctg3094□WAG-48I11

ctg4321□ctg3096□ctg3094□WAG-119B6  
ctg4321□ctg3327□ctg3392□WAG-70I23  
ctg4321□ctg3327□ctg3392□WAG-106D6  
ctg4321□ctg4023□ctg5971□WAG-55K5  
ctg4321□ctg4023□ctg5971□WAG-64H6  
ctg4321□ctg4023□ctg6216□WAG-54E12  
ctg4321□ctg4023□ctg6216□WAG-57J11  
ctg4321□ctg4988□ctg5429□WAG-47G6  
ctg4321□ctg4988□ctg5429□WAG-83J14  
ctg4322□□□WAG-47M13  
ctg4322□□□WAG-82L7  
ctg4322□ctg2066□□WAG-61D21  
ctg4322□ctg2066□□WAG-99N8  
ctg4322□ctg2066□ctg2106□WAG-75P20  
ctg4322□ctg2066□ctg2106□WAG-101B20  
ctg4322□ctg2066□ctg2106□WAG-103B14  
ctg4322□ctg2066□ctg2106□WAG-107E23  
ctg4322□ctg2066□ctg2106□WAG-111A12  
ctg4322□ctg2066□ctg2106□WAG-120O13  
ctg4322□ctg2387□ctg2288□WAG-8A15  
ctg4322□ctg2387□ctg2288□WAG-107H13  
ctg4322□ctg4978□ctg5406□WAG-63P5  
ctg4322□ctg4978□ctg5406□WAG-78I14  
ctg4322□ctg5127□ctg5756□WAG-8G7  
ctg4322□ctg5127□ctg5756□WAG-64M24  
ctg4323□□□WAG-92L15  
ctg4323□ctg158□□WAG-50J14  
ctg4323□ctg158□ctg125□WAG-8E7  
ctg4323□ctg158□ctg125□WAG-15L12  
ctg4323□ctg158□ctg125□WAG-34H4  
ctg4323□ctg158□ctg125□WAG-42L8  
ctg4323□ctg158□ctg125□WAG-47G4  
ctg4323□ctg158□ctg125□WAG-50B17  
ctg4323□ctg158□ctg125□WAG-53H23  
ctg4323□ctg158□ctg125□WAG-54C13  
ctg4323□ctg158□ctg125□WAG-72O10  
ctg4323□ctg158□ctg125□WAG-93H7  
ctg4323□ctg158□ctg125□WAG-94K22  
ctg4323□ctg158□ctg125□WAG-95K21  
ctg4323□ctg158□ctg125□WAG-103O8  
ctg4323□ctg158□ctg125□WAG-121P12  
ctg4323□ctg158□ctg125□WAG-123I13  
ctg4323□ctg158□ctg3267□WAG-20C11  
ctg4323□ctg158□ctg3267□WAG-48C19  
ctg4323□ctg158□ctg3267□WAG-79J6  
ctg4323□ctg2330□□WAG-2K10  
ctg4323□ctg2330□ctg2536□WAG-7L18  
ctg4323□ctg2330□ctg2536□WAG-25M7  
ctg4323□ctg2330□ctg2536□WAG-68M14  
ctg4323□ctg2330□ctg2536□WAG-106E2  
ctg4323□ctg2330□ctg2536□WAG-111G17  
ctg4323□ctg857□□WAG-84A1  
ctg4323□ctg857□□WAG-89G5  
ctg4323□ctg857□ctg1294□WAG-12M18  
ctg4323□ctg857□ctg1294□WAG-20M10  
ctg4323□ctg857□ctg1294□WAG-51K14

ctg4323□ctg857□ctg1294□WAG-51O10  
ctg4323□ctg857□ctg1294□WAG-58J1  
ctg4323□ctg857□ctg1294□WAG-60H8  
ctg4323□ctg857□ctg1294□WAG-66K18  
ctg4323□ctg857□ctg1294□WAG-89P10  
ctg4323□ctg857□ctg2112□WAG-56J10  
ctg4323□ctg857□ctg2112□WAG-69A9  
ctg4323□ctg857□ctg2112□WAG-70J18  
ctg4323□ctg857□ctg2112□WAG-94M8  
ctg4323□ctg857□ctg2112□WAG-115G21  
ctg4323□ctg857□ctg2112□WAG-117G5  
ctg4323□ctg857□ctg3902□WAG-12G14  
ctg4323□ctg857□ctg3902□WAG-44G20  
ctg4323□ctg857□ctg3902□WAG-114M1  
ctg4323□ctg857□ctg3902□WAG-128A17  
ctg4323□ctg857□ctg6630□WAG-21M14  
ctg4323□ctg857□ctg6630□WAG-77L14  
ctg4324□ctg4950□ctg5329□WAG-49B10  
ctg4324□ctg4950□ctg5329□WAG-118L18  
ctg4325□□□WAG-81C20  
ctg4325□ctg1115□□WAG-8E15  
ctg4325□ctg1115□□WAG-126M4  
ctg4325□ctg1115□ctg1775□WAG-75K22  
ctg4325□ctg1115□ctg1775□WAG-99I13  
ctg4325□ctg1115□ctg1775□WAG-101M6  
ctg4325□ctg1115□ctg1775□WAG-127M23  
ctg4325□ctg1115□ctg1782□WAG-25K3  
ctg4325□ctg1115□ctg1782□WAG-77C9  
ctg4325□ctg1115□ctg1782□WAG-91H5  
ctg4325□ctg3029□ctg3956□WAG-61P15  
ctg4325□ctg3029□ctg3956□WAG-104H16  
ctg4325□ctg3029□ctg3956□WAG-108O8  
ctg4325□ctg3029□ctg5888□WAG-94O2  
ctg4325□ctg3029□ctg5888□WAG-113O24  
ctg4325□ctg4922□ctg5264□WAG-11H4  
ctg4325□ctg4922□ctg5264□WAG-17J3  
ctg4326□□□WAG-12E23  
ctg4326□□□WAG-50D1  
ctg4326□□□WAG-51G14  
ctg4326□□□WAG-67B16  
ctg4326□ctg2405□ctg2303□WAG-16P9  
ctg4326□ctg2405□ctg2303□WAG-30O19  
ctg4326□ctg2405□ctg2303□WAG-103N14  
ctg4326□ctg2822□□WAG-51N20  
ctg4326□ctg2822□□WAG-76L23  
ctg4326□ctg2822□ctg3842□WAG-4F20  
ctg4326□ctg2822□ctg3842□WAG-36N14  
ctg4326□ctg2822□ctg3842□WAG-66N12  
ctg4326□ctg3468□□WAG-12M15  
ctg4326□ctg3468□□WAG-29L4  
ctg4326□ctg3468□□WAG-77H21  
ctg4326□ctg3468□□WAG-107C15  
ctg4326□ctg3468□ctg4682□WAG-45H15  
ctg4326□ctg3468□ctg4682□WAG-78J16  
ctg4326□ctg4850□ctg5128□WAG-74L21  
ctg4326□ctg4850□ctg5128□WAG-125B21

ctg4327□□□WAG-13F3  
ctg4327□ctg2711□ctg3443□WAG-3L11  
ctg4327□ctg2711□ctg3443□WAG-8I3  
ctg4327□ctg2711□ctg3443□WAG-83J21  
ctg4327□ctg2711□ctg3443□WAG-124H1  
ctg4327□ctg4792□□WAG-19K8  
ctg4327□ctg4792□□WAG-21E8  
ctg4327□ctg4792□□WAG-25O8  
ctg4328□□□WAG-22D3  
ctg4328□ctg4189□□WAG-17K22  
ctg4328□ctg4189□ctg6008□WAG-37G20  
ctg4328□ctg4189□ctg6008□WAG-97J20  
ctg4328□ctg6046□□WAG-115B13  
ctg4328□ctg6046□□WAG-122B20  
ctg4329□□□WAG-2I2  
ctg4329□□□WAG-52E22  
ctg4329□□□WAG-96J4  
ctg4329□□□WAG-130B13  
ctg4329□ctg2374□ctg2270□WAG-17O14  
ctg4329□ctg2374□ctg2270□WAG-20A17  
ctg4329□ctg2374□ctg2270□WAG-25C2  
ctg4329□ctg2374□ctg2270□WAG-33G23  
ctg4329□ctg2374□ctg2270□WAG-38M9  
ctg4329□ctg2374□ctg2270□WAG-66G15  
ctg4329□ctg2374□ctg2270□WAG-91H13  
ctg4329□ctg2374□ctg2270□WAG-100J9  
ctg4329□ctg2494□□WAG-34G18  
ctg4329□ctg2494□ctg2419□WAG-24A14  
ctg4329□ctg2494□ctg2419□WAG-89N19  
ctg4329□ctg2494□ctg2419□WAG-117A17  
ctg4329□ctg2494□ctg2419□WAG-117K5  
ctg4329□ctg4710□□WAG-17M12  
ctg4329□ctg4710□□WAG-20L5  
ctg4329□ctg4710□□WAG-21D20  
ctg4329□ctg6072□□WAG-86I17  
ctg4329□ctg6072□□WAG-116P20  
ctg433□□□WAG-28M21  
ctg433□ctg1174□□WAG-99L23  
ctg433□ctg1174□ctg1317□WAG-18G19  
ctg433□ctg1174□ctg1317□WAG-61F17  
ctg433□ctg1174□ctg1317□WAG-71H23  
ctg433□ctg1174□ctg1317□WAG-84M19  
ctg433□ctg1174□ctg1317□WAG-91E7  
ctg433□ctg1174□ctg1317□WAG-110H5  
ctg433□ctg1174□ctg4331□WAG-18O16  
ctg433□ctg1174□ctg4331□WAG-122I3  
ctg4330□□□WAG-22A1  
ctg4330□□□WAG-46A5  
ctg4330□□□WAG-84P19  
ctg4330□□□WAG-90N16  
ctg4330□ctg1165□□WAG-15P13  
ctg4330□ctg1165□□WAG-38J3  
ctg4330□ctg1165□ctg1312□WAG-77E20  
ctg4330□ctg1165□ctg1312□WAG-90N17  
ctg4330□ctg1165□ctg1312□WAG-106G22  
ctg4330□ctg1165□ctg1312□WAG-128O10



ctg4330□ctg1165□ctg6244□WAG-21K2  
ctg4330□ctg1165□ctg6244□WAG-116M12  
ctg4330□ctg2579□□WAG-35P16  
ctg4330□ctg2579□ctg2541□WAG-62C18  
ctg4330□ctg2579□ctg2541□WAG-101M14  
ctg4330□ctg2579□ctg2541□WAG-120J20  
ctg4330□ctg2579□ctg2541□WAG-124F21  
ctg4330□ctg2579□ctg5807□WAG-58I1  
ctg4330□ctg2579□ctg5807□WAG-85C17  
ctg4330□ctg5676□ctg6854□WAG-2A16  
ctg4330□ctg5676□ctg6854□WAG-3P19  
ctg4330□ctg5697□□WAG-54C22  
ctg4330□ctg5697□□WAG-66O9  
ctg4330□ctg6067□□WAG-55J6  
ctg4330□ctg6067□□WAG-109I4  
ctg4330□ctg65□ctg48□WAG-14H20  
ctg4330□ctg65□ctg48□WAG-43H19  
ctg4330□ctg65□ctg48□WAG-43N19  
ctg4330□ctg65□ctg48□WAG-62G19  
ctg4330□ctg65□ctg48□WAG-79D21  
ctg4330□ctg65□ctg48□WAG-109D7  
ctg4330□ctg65□ctg48□WAG-117D17  
ctg4331□ctg1199□ctg1390□WAG-79G6  
ctg4331□ctg1199□ctg1390□WAG-96C5  
ctg4331□ctg1199□ctg1390□WAG-102J13  
ctg4331□ctg1199□ctg1390□WAG-105K12  
ctg4331□ctg1199□ctg1390□WAG-108J2  
ctg4331□ctg1632□ctg1882□WAG-60A7  
ctg4331□ctg1632□ctg1882□WAG-79N7  
ctg4331□ctg1632□ctg1882□WAG-102O4  
ctg4331□ctg1632□ctg1882□WAG-124D13  
ctg4331□ctg1632□ctg1882□WAG-128C1  
ctg4331□ctg4530□□WAG-29D9  
ctg4331□ctg4530□□WAG-38K20  
ctg4331□ctg4530□□WAG-50G20  
ctg4332□□□WAG-69F13  
ctg4332□□□WAG-98D1  
ctg4332□□□WAG-112D16  
ctg4332□ctg405□□WAG-39G16  
ctg4332□ctg405□ctg314□WAG-43M5  
ctg4332□ctg405□ctg314□WAG-59A5  
ctg4332□ctg405□ctg314□WAG-60A22  
ctg4332□ctg405□ctg314□WAG-61B15  
ctg4332□ctg405□ctg314□WAG-86H4  
ctg4332□ctg405□ctg314□WAG-121C15  
ctg4332□ctg915□□WAG-55F2  
ctg4332□ctg915□□WAG-94A8  
ctg4332□ctg915□ctg5306□WAG-47A3  
ctg4332□ctg915□ctg5306□WAG-59G7  
ctg4332□ctg915□ctg759□WAG-24N4  
ctg4332□ctg915□ctg759□WAG-26O2  
ctg4332□ctg915□ctg759□WAG-28D12  
ctg4332□ctg915□ctg759□WAG-33D17  
ctg4332□ctg915□ctg759□WAG-57A21  
ctg4332□ctg915□ctg759□WAG-67H23  
ctg4332□ctg915□ctg759□WAG-74E9

ctg4332□ctg915□ctg759□WAG-84P2  
ctg4332□ctg915□ctg759□WAG-95P12  
ctg4333□□□WAG-1N21  
ctg4333□ctg2355□□WAG-45L24  
ctg4333□ctg2355□ctg2809□WAG-45L8  
ctg4333□ctg2355□ctg2809□WAG-46C22  
ctg4333□ctg2355□ctg2809□WAG-49F17  
ctg4333□ctg2355□ctg2809□WAG-130K8  
ctg4333□ctg4526□□WAG-46L3  
ctg4333□ctg4526□□WAG-61E4  
ctg4333□ctg4526□□WAG-89D7  
ctg4333□ctg4526□□WAG-91D6  
ctg4334□□□WAG-36M24  
ctg4334□ctg1149□□WAG-126C11  
ctg4334□ctg1149□ctg1002□WAG-12C7  
ctg4334□ctg1149□ctg1002□WAG-37P8  
ctg4334□ctg1149□ctg1002□WAG-45N7  
ctg4334□ctg1149□ctg1002□WAG-48G13  
ctg4334□ctg1149□ctg1002□WAG-69K5  
ctg4334□ctg1149□ctg1002□WAG-71P7  
ctg4334□ctg1149□ctg1002□WAG-77J13  
ctg4334□ctg1149□ctg1002□WAG-119G16  
ctg4334□ctg4515□ctg4641□WAG-51O5  
ctg4334□ctg4515□ctg4641□WAG-126F7  
ctg4334□ctg922□ctg1198□WAG-5P24  
ctg4334□ctg922□ctg1198□WAG-32E12  
ctg4334□ctg922□ctg1198□WAG-60I9  
ctg4334□ctg922□ctg1198□WAG-63F8  
ctg4334□ctg922□ctg1198□WAG-65E24  
ctg4334□ctg922□ctg1198□WAG-68G5  
ctg4334□ctg922□ctg1198□WAG-80O10  
ctg4334□ctg922□ctg1198□WAG-83F5  
ctg4334□ctg922□ctg1198□WAG-92D21  
ctg4334□ctg922□ctg1198□WAG-94K21  
ctg4334□ctg922□ctg1198□WAG-118A14  
ctg4334□ctg922□ctg1198□WAG-120M1  
ctg4335□□□WAG-73G5  
ctg4335□ctg5137□ctg5777□WAG-44J5  
ctg4335□ctg5137□ctg5777□WAG-126P4  
ctg4336□ctg5820□□WAG-48E9  
ctg4336□ctg5820□□WAG-70D17  
ctg4336□ctg627□□WAG-12G19  
ctg4336□ctg627□□WAG-20P3  
ctg4336□ctg627□□WAG-31G4  
ctg4336□ctg627□□WAG-76H8  
ctg4336□ctg627□ctg2754□WAG-3I14  
ctg4336□ctg627□ctg2754□WAG-12G5  
ctg4336□ctg627□ctg2754□WAG-35A2  
ctg4336□ctg627□ctg2754□WAG-49O21  
ctg4336□ctg627□ctg2754□WAG-53F16  
ctg4336□ctg627□ctg2754□WAG-60E15  
ctg4336□ctg627□ctg2754□WAG-87D24  
ctg4336□ctg627□ctg5450□WAG-23L3  
ctg4336□ctg627□ctg5450□WAG-81G13  
ctg4336□ctg627□ctg971□WAG-42J1  
ctg4336□ctg627□ctg971□WAG-57G9

ctg4336□ctg627□ctg971□WAG-67F19  
ctg4336□ctg627□ctg971□WAG-68N16  
ctg4336□ctg627□ctg971□WAG-79F19  
ctg4336□ctg627□ctg971□WAG-79K16  
ctg4336□ctg627□ctg971□WAG-85F1  
ctg4336□ctg627□ctg971□WAG-88P3  
ctg4336□ctg627□ctg971□WAG-93O22  
ctg4336□ctg627□ctg971□WAG-95K6  
ctg4336□ctg627□ctg971□WAG-124F3  
ctg4337□□□WAG-33A8  
ctg4337□ctg4269□□WAG-39K4  
ctg4337□ctg4269□ctg6205□WAG-100F1  
ctg4337□ctg4269□ctg6205□WAG-120O3  
ctg4338□ctg4263□□WAG-109O7  
ctg4338□ctg4263□ctg6176□WAG-9F11  
ctg4338□ctg4263□ctg6176□WAG-45L3  
ctg4339□ctg4170□ctg4405□WAG-11A17  
ctg4339□ctg4170□ctg4405□WAG-118J13  
ctg434□ctg1212□□WAG-3L14  
ctg434□ctg1212□ctg1781□WAG-31M22  
ctg434□ctg1212□ctg1781□WAG-49C11  
ctg434□ctg1212□ctg1781□WAG-50G5  
ctg434□ctg1212□ctg1781□WAG-50I19  
ctg434□ctg1212□ctg1781□WAG-110H16  
ctg434□ctg1212□ctg1781□WAG-123B18  
ctg4340□ctg4004□□WAG-109C3  
ctg4340□ctg4004□ctg5530□WAG-7N20  
ctg4340□ctg4004□ctg5530□WAG-127L5  
ctg4341□ctg3989□□WAG-93E24  
ctg4341□ctg3989□ctg5692□WAG-19C7  
ctg4341□ctg3989□ctg5692□WAG-33K13  
ctg4342□□□WAG-1K8  
ctg4342□□□WAG-69O10  
ctg4342□ctg129□□WAG-20C10  
ctg4342□ctg129□ctg133□WAG-7A16  
ctg4342□ctg129□ctg133□WAG-33A7  
ctg4342□ctg129□ctg133□WAG-40P3  
ctg4342□ctg129□ctg133□WAG-50N5  
ctg4342□ctg129□ctg133□WAG-89N14  
ctg4342□ctg129□ctg133□WAG-104K21  
ctg4342□ctg129□ctg133□WAG-106I22  
ctg4342□ctg129□ctg133□WAG-115N4  
ctg4342□ctg129□ctg133□WAG-123N6  
ctg4342□ctg2744□ctg2722□WAG-97L19  
ctg4342□ctg2744□ctg2722□WAG-113A4  
ctg4342□ctg2744□ctg2722□WAG-117K23  
ctg4342□ctg4857□ctg5141□WAG-14H16  
ctg4342□ctg4857□ctg5141□WAG-121I1  
ctg4343□□□WAG-22D20  
ctg4343□□□WAG-39I16  
ctg4343□ctg3636□□WAG-77D3  
ctg4343□ctg3636□ctg4923□WAG-32A4  
ctg4343□ctg3636□ctg4923□WAG-89E19  
ctg4343□ctg3895□ctg4177□WAG-65L1  
ctg4343□ctg3895□ctg4177□WAG-117O20  
ctg4343□ctg3895□ctg4177□WAG-119D23

ctg4344□□□WAG-116F5  
ctg4344□ctg386□□WAG-15O9  
ctg4344□ctg386□ctg484□WAG-17B17  
ctg4344□ctg386□ctg484□WAG-43C17  
ctg4344□ctg386□ctg484□WAG-44M17  
ctg4344□ctg386□ctg484□WAG-46K1  
ctg4344□ctg386□ctg484□WAG-59C2  
ctg4344□ctg386□ctg484□WAG-70A15  
ctg4344□ctg386□ctg484□WAG-75P2  
ctg4344□ctg386□ctg484□WAG-86P16  
ctg4344□ctg386□ctg484□WAG-88A20  
ctg4344□ctg386□ctg484□WAG-89E16  
ctg4344□ctg386□ctg484□WAG-102C22  
ctg4344□ctg386□ctg484□WAG-122E8  
ctg4344□ctg386□ctg6193□WAG-68G6  
ctg4344□ctg386□ctg6193□WAG-112B5  
ctg4344□ctg3879□ctg4145□WAG-52H11  
ctg4344□ctg3879□ctg4145□WAG-61B12  
ctg4344□ctg3879□ctg4145□WAG-115D5  
ctg4344□ctg4607□ctg4769□WAG-68C3  
ctg4344□ctg4607□ctg4769□WAG-87I13  
ctg4344□ctg5404□ctg6399□WAG-71D5  
ctg4344□ctg5404□ctg6399□WAG-77B12  
ctg4345□ctg3777□ctg4028□WAG-57H11  
ctg4345□ctg3777□ctg4028□WAG-114N24  
ctg4346□□□WAG-27K24  
ctg4346□ctg5490□ctg6582□WAG-28A11  
ctg4346□ctg5490□ctg6582□WAG-100J18  
ctg4346□ctg5633□□WAG-87F17  
ctg4346□ctg5633□□WAG-126J15  
ctg4347□□□WAG-109I14  
ctg4347□ctg1168□□WAG-68K8  
ctg4347□ctg1168□□WAG-70F11  
ctg4347□ctg1168□□WAG-126N17  
ctg4347□ctg1168□ctg1718□WAG-57E7  
ctg4347□ctg1168□ctg1718□WAG-93D23  
ctg4347□ctg1168□ctg1718□WAG-100M15  
ctg4347□ctg1168□ctg1718□WAG-104H20  
ctg4347□ctg1168□ctg1718□WAG-115G11  
ctg4347□ctg1168□ctg4561□WAG-59L15  
ctg4347□ctg1168□ctg4561□WAG-60P1  
ctg4347□ctg3732□□WAG-103J3  
ctg4347□ctg3732□ctg5153□WAG-41P4  
ctg4347□ctg3732□ctg5153□WAG-127O8  
ctg4347□ctg4329□□WAG-30N13  
ctg4347□ctg4329□ctg6097□WAG-97K22  
ctg4347□ctg4329□ctg6097□WAG-130D16  
ctg4348□□□WAG-99A10  
ctg4348□ctg1187□□WAG-60C10  
ctg4348□ctg1187□ctg1030□WAG-7K21  
ctg4348□ctg1187□ctg1030□WAG-34N3  
ctg4348□ctg1187□ctg1030□WAG-49P13  
ctg4348□ctg1187□ctg1030□WAG-73F3  
ctg4348□ctg1187□ctg1030□WAG-80A11  
ctg4348□ctg1187□ctg1030□WAG-127K9  
ctg4348□ctg3671□□WAG-43K13

ctg4348□ctg3671□□WAG-45G8  
ctg4348□ctg3671□□WAG-87N16  
ctg4348□ctg3671□□WAG-92N6  
ctg4349□□□WAG-87N17  
ctg4349□ctg3668□ctg3862□WAG-36A17  
ctg4349□ctg3668□ctg3862□WAG-51C11  
ctg4349□ctg3668□ctg3862□WAG-120K23  
ctg435□ctg1006□ctg3515□WAG-75P11  
ctg435□ctg1006□ctg3515□WAG-125B3  
ctg435□ctg1006□ctg847□WAG-16E11  
ctg435□ctg1006□ctg847□WAG-49N8  
ctg435□ctg1006□ctg847□WAG-78L6  
ctg435□ctg1006□ctg847□WAG-79M11  
ctg435□ctg1006□ctg847□WAG-122G17  
ctg435□ctg1006□ctg847□WAG-125A3  
ctg4350□□□WAG-6G20  
ctg4350□□□WAG-30K8  
ctg4350□□□WAG-59N19  
ctg4350□□□WAG-109O1  
ctg4350□□□WAG-116A14  
ctg4350□ctg1131□□WAG-23P21  
ctg4350□ctg1131□ctg1126□WAG-4H12  
ctg4350□ctg1131□ctg1126□WAG-4M5  
ctg4350□ctg1131□ctg1126□WAG-26C17  
ctg4350□ctg1131□ctg1126□WAG-56N13  
ctg4350□ctg1131□ctg1126□WAG-59A9  
ctg4350□ctg1131□ctg1126□WAG-59D5  
ctg4350□ctg1131□ctg1126□WAG-64M17  
ctg4350□ctg1131□ctg1126□WAG-64P15  
ctg4350□ctg1131□ctg1126□WAG-69L24  
ctg4350□ctg1131□ctg1126□WAG-80A18  
ctg4350□ctg1131□ctg1126□WAG-86C23  
ctg4350□ctg1131□ctg1126□WAG-114B16  
ctg4350□ctg1131□ctg1126□WAG-114F3  
ctg4350□ctg1131□ctg1126□WAG-116D23  
ctg4350□ctg1131□ctg1126□WAG-118F6  
ctg4350□ctg1131□ctg2828□WAG-59D22  
ctg4350□ctg1131□ctg2828□WAG-72O12  
ctg4350□ctg1131□ctg2828□WAG-100D15  
ctg4350□ctg1131□ctg2828□WAG-115G7  
ctg4350□ctg2329□□WAG-8B11  
ctg4350□ctg2329□□WAG-82J3  
ctg4350□ctg2329□ctg3601□WAG-13O13  
ctg4350□ctg2329□ctg3601□WAG-54O3  
ctg4350□ctg2329□ctg3601□WAG-112I24  
ctg4350□ctg2329□ctg4416□WAG-63I22  
ctg4350□ctg2329□ctg4416□WAG-100O11  
ctg4350□ctg2329□ctg4416□WAG-128H7  
ctg4350□ctg3768□ctg4013□WAG-44D3  
ctg4350□ctg3768□ctg4013□WAG-44L9  
ctg4350□ctg3964□□WAG-107N21  
ctg4350□ctg3964□ctg5802□WAG-69F10  
ctg4350□ctg3964□ctg5802□WAG-71I12  
ctg4350□ctg5240□ctg6023□WAG-62F6  
ctg4350□ctg5240□ctg6023□WAG-80P4  
ctg4351□□□WAG-2N20

ctg4351□□□WAG-50C20  
ctg4351□□□WAG-122J23  
ctg4351□ctg3527□□WAG-52M1  
ctg4351□ctg3527□□WAG-61C7  
ctg4351□ctg3527□□WAG-89A2  
ctg4351□ctg3527□□WAG-105P2  
ctg4352□□□WAG-80A5  
ctg4352□ctg3480□ctg3602□WAG-16F22  
ctg4352□ctg3480□ctg3602□WAG-97O8  
ctg4352□ctg3480□ctg3602□WAG-107G17  
ctg4352□ctg3533□□WAG-56P4  
ctg4352□ctg3533□□WAG-98G21  
ctg4352□ctg3533□ctg4602□WAG-46K3  
ctg4352□ctg3533□ctg4602□WAG-112F7  
ctg4353□ctg3478□ctg3599□WAG-78I2  
ctg4353□ctg3478□ctg3599□WAG-93J9  
ctg4353□ctg3478□ctg3599□WAG-125E15  
ctg4354□□□WAG-56B14  
ctg4354□ctg3690□ctg3893□WAG-58N17  
ctg4354□ctg3690□ctg3893□WAG-102C20  
ctg4354□ctg3690□ctg3893□WAG-103M14  
ctg4355□□□WAG-63N8  
ctg4355□ctg3587□ctg3759□WAG-37G10  
ctg4355□ctg3587□ctg3759□WAG-71M22  
ctg4355□ctg3587□ctg3759□WAG-83F13  
ctg4356□□□WAG-73M23  
ctg4356□□□WAG-75H12  
ctg4356□ctg3398□ctg3497□WAG-56E17  
ctg4356□ctg3398□ctg3497□WAG-83H5  
ctg4356□ctg3398□ctg3497□WAG-94K2  
ctg4356□ctg3398□ctg3497□WAG-95K24  
ctg4357□□□WAG-114A2  
ctg4357□ctg3132□□WAG-11B19  
ctg4357□ctg3132□□WAG-80N13  
ctg4357□ctg3132□ctg4117□WAG-69O22  
ctg4357□ctg3132□ctg4117□WAG-78N12  
ctg4357□ctg3132□ctg4117□WAG-104H4  
ctg4357□ctg3308□ctg3370□WAG-68G23  
ctg4357□ctg3308□ctg3370□WAG-88H22  
ctg4357□ctg3308□ctg3370□WAG-95F15  
ctg4358□ctg3305□ctg5513□WAG-47E14  
ctg4358□ctg3305□ctg5513□WAG-49J22  
ctg4358□ctg3305□ctg6242□WAG-90A18  
ctg4358□ctg3305□ctg6242□WAG-120K11  
ctg4359□ctg3224□ctg4253□WAG-7M18  
ctg4359□ctg3224□ctg4253□WAG-75I8  
ctg4359□ctg3224□ctg4253□WAG-125A19  
ctg4359□ctg3224□ctg4253□WAG-129I9  
ctg4359□ctg3273□ctg3326□WAG-13F15  
ctg4359□ctg3273□ctg3326□WAG-51F17  
ctg4359□ctg3273□ctg3326□WAG-84N24  
ctg436□□□WAG-25M3  
ctg436□□□WAG-34F12  
ctg436□□□WAG-82G4  
ctg436□ctg1180□□WAG-47L4  
ctg436□ctg1180□ctg1622□WAG-8D5

ctg436□ctg1180□ctg1622□WAG-8K4  
ctg436□ctg1180□ctg1622□WAG-58A18  
ctg436□ctg1180□ctg1622□WAG-71E1  
ctg436□ctg1180□ctg1622□WAG-127J5  
ctg436□ctg2813□ctg2807□WAG-8D23  
ctg436□ctg2813□ctg2807□WAG-61K2  
ctg436□ctg2813□ctg2807□WAG-84F9  
ctg436□ctg3818□□WAG-20F7  
ctg436□ctg3818□ctg5424□WAG-16P18  
ctg436□ctg3818□ctg5424□WAG-122G2  
ctg436□ctg4838□ctg5109□WAG-119K1  
ctg436□ctg4838□ctg5109□WAG-129P10  
ctg4360□□□WAG-29H6  
ctg4360□□□WAG-92J15  
ctg4360□ctg1465□□WAG-84B12  
ctg4360□ctg1465□ctg2560□WAG-40K11  
ctg4360□ctg1465□ctg2560□WAG-50F12  
ctg4360□ctg1465□ctg2560□WAG-51M19  
ctg4360□ctg1465□ctg2560□WAG-57G24  
ctg4360□ctg1465□ctg2560□WAG-62M16  
ctg4360□ctg1465□ctg2560□WAG-65O11  
ctg4360□ctg1465□ctg2560□WAG-112K7  
ctg4360□ctg1465□ctg2560□WAG-130P20  
ctg4360□ctg1465□ctg2666□WAG-43J8  
ctg4360□ctg1465□ctg2666□WAG-81G7  
ctg4360□ctg1465□ctg2666□WAG-121P23  
ctg4360□ctg1465□ctg6406□WAG-11N11  
ctg4360□ctg1465□ctg6406□WAG-66L14  
ctg4360□ctg3909□ctg4193□WAG-15H18  
ctg4360□ctg3909□ctg4193□WAG-46M15  
ctg4360□ctg3909□ctg4193□WAG-70I20  
ctg4360□ctg5075□ctg5624□WAG-56F19  
ctg4360□ctg5075□ctg5624□WAG-102H2  
ctg4361□ctg1273□□WAG-5A24  
ctg4361□ctg1273□□WAG-77J1  
ctg4361□ctg1273□ctg1642□WAG-43I15  
ctg4361□ctg1273□ctg1642□WAG-95K16  
ctg4361□ctg1273□ctg1642□WAG-113G18  
ctg4361□ctg1273□ctg1642□WAG-127L16  
ctg4361□ctg6005□□WAG-26L11  
ctg4361□ctg6005□□WAG-65E15  
ctg4362□ctg3248□ctg3286□WAG-34G14  
ctg4362□ctg3248□ctg3286□WAG-70D8  
ctg4362□ctg3248□ctg3286□WAG-103I20  
ctg4363□□□WAG-60A1  
ctg4363□ctg3868□ctg4134□WAG-58I18  
ctg4363□ctg3868□ctg4134□WAG-62E11  
ctg4363□ctg3868□ctg4134□WAG-74D1  
ctg4363□ctg3868□ctg4134□WAG-116O3  
ctg4363□ctg3868□ctg4134□WAG-121H5  
ctg4364□□□WAG-3H4  
ctg4364□□□WAG-59L20  
ctg4364□□□WAG-70J7  
ctg4364□ctg3848□□WAG-49M18  
ctg4364□ctg3848□ctg4115□WAG-17C7  
ctg4364□ctg3848□ctg4115□WAG-118J11

ctg4364□ctg3848□ctg4115□WAG-129K7  
ctg4364□ctg4615□□WAG-24A12  
ctg4364□ctg4615□□WAG-48O8  
ctg4364□ctg4615□□WAG-85N6  
ctg4365□ctg3479□□WAG-51A1  
ctg4365□ctg3479□□WAG-82P2  
ctg4365□ctg3479□ctg5299□WAG-59I1  
ctg4365□ctg3479□ctg5299□WAG-59I19  
ctg4366□□□WAG-39D12  
ctg4366□□□WAG-63B2  
ctg4366□ctg3085□□WAG-93P7  
ctg4366□ctg3085□ctg4010□WAG-29I5  
ctg4366□ctg3085□ctg4010□WAG-73J9  
ctg4366□ctg3085□ctg4731□WAG-15E1  
ctg4366□ctg3085□ctg4731□WAG-100M21  
ctg4367□ctg3063□ctg3060□WAG-65N20  
ctg4367□ctg3063□ctg3060□WAG-82P15  
ctg4367□ctg3063□ctg3060□WAG-130I8  
ctg4368□□□WAG-32L4  
ctg4368□ctg3044□ctg3039□WAG-4G8  
ctg4368□ctg3044□ctg3039□WAG-111K5  
ctg4368□ctg3044□ctg3039□WAG-113E10  
ctg4369□□□WAG-5I14  
ctg4369□□□WAG-19G16  
ctg4369□□□WAG-124M16  
ctg4369□ctg1911□ctg1748□WAG-13O3  
ctg4369□ctg1911□ctg1748□WAG-14F10  
ctg4369□ctg1911□ctg1748□WAG-44K12  
ctg4369□ctg1911□ctg1748□WAG-62B12  
ctg4369□ctg1911□ctg1748□WAG-113I18  
ctg4369□ctg2069□□WAG-40J15  
ctg4369□ctg2069□□WAG-66B13  
ctg4369□ctg2069□□WAG-88C3  
ctg4369□ctg2069□ctg3353□WAG-97N10  
ctg4369□ctg2069□ctg3353□WAG-110O16  
ctg4369□ctg2069□ctg3353□WAG-129H9  
ctg4369□ctg2069□ctg4169□WAG-12G2  
ctg4369□ctg2069□ctg4169□WAG-19J8  
ctg4369□ctg2069□ctg4169□WAG-80J4  
ctg4369□ctg337□ctg443□WAG-35F24  
ctg4369□ctg337□ctg443□WAG-38M19  
ctg4369□ctg337□ctg443□WAG-46F11  
ctg4369□ctg337□ctg443□WAG-58B6  
ctg4369□ctg337□ctg443□WAG-85O21  
ctg4369□ctg337□ctg443□WAG-88H8  
ctg4369□ctg337□ctg443□WAG-103N4  
ctg4369□ctg337□ctg443□WAG-104C14  
ctg4369□ctg337□ctg443□WAG-124I7  
ctg4369□ctg3606□□WAG-112J12  
ctg4369□ctg3606□ctg3785□WAG-42N13  
ctg4369□ctg3606□ctg3785□WAG-68D5  
ctg4369□ctg3606□ctg3785□WAG-130K2  
ctg437□ctg1233□□WAG-38A24  
ctg437□ctg1233□□WAG-82G13  
ctg437□ctg1233□ctg2471□WAG-11L16  
ctg437□ctg1233□ctg2471□WAG-19D8



ctg437□ctg1233□ctg2471□WAG-19J9  
ctg437□ctg1233□ctg2471□WAG-20C7  
ctg437□ctg1233□ctg2471□WAG-90M14  
ctg437□ctg1233□ctg2471□WAG-99N22  
ctg437□ctg1233□ctg3608□WAG-32G14  
ctg437□ctg1233□ctg3608□WAG-71E21  
ctg437□ctg1233□ctg3608□WAG-79D11  
ctg4370□□□WAG-5K1  
ctg4370□□□WAG-53M21  
ctg4370□ctg3517□□WAG-41D16  
ctg4370□ctg3517□ctg3653□WAG-16F12  
ctg4370□ctg3517□ctg3653□WAG-28G14  
ctg4370□ctg3517□ctg3653□WAG-63N24  
ctg4370□ctg6092□□WAG-33H4  
ctg4370□ctg6092□□WAG-69C24  
ctg4371□□□WAG-94O9  
ctg4371□□□WAG-104O2  
ctg4371□ctg3058□□WAG-44F15  
ctg4371□ctg3058□□WAG-101G1  
ctg4371□ctg3058□ctg4833□WAG-70F2  
ctg4371□ctg3058□ctg4833□WAG-123L15  
ctg4371□ctg4254□ctg4455□WAG-28H22  
ctg4371□ctg4254□ctg4455□WAG-120K24  
ctg4372□□□WAG-94F14  
ctg4372□ctg3389□□WAG-52G23  
ctg4372□ctg3389□□WAG-56K18  
ctg4372□ctg3389□□WAG-59F15  
ctg4372□ctg3389□□WAG-94L21  
ctg4372□ctg3389□ctg6010□WAG-81J5  
ctg4372□ctg3389□ctg6010□WAG-94E3  
ctg4372□ctg4374□□WAG-26L4  
ctg4372□ctg4374□ctg6581□WAG-22K19  
ctg4372□ctg4374□ctg6581□WAG-28B19  
ctg4372□ctg4954□ctg5346□WAG-88I3  
ctg4372□ctg4954□ctg5346□WAG-103D16  
ctg4373□□□WAG-89K5  
ctg4373□ctg2873□□WAG-44L2  
ctg4373□ctg2873□□WAG-58L22  
ctg4373□ctg2873□□WAG-103K3  
ctg4373□ctg2873□ctg4637□WAG-42G6  
ctg4373□ctg2873□ctg4637□WAG-90H5  
ctg4374□ctg2864□ctg3901□WAG-15I1  
ctg4374□ctg2864□ctg3901□WAG-40D6  
ctg4374□ctg2864□ctg3901□WAG-71A5  
ctg4374□ctg2864□ctg3901□WAG-108J24  
ctg4375□□□WAG-23J20  
ctg4375□□□WAG-97B10  
ctg4375□□□WAG-107E22  
ctg4375□ctg1997□□WAG-100P15  
ctg4375□ctg1997□ctg2520□WAG-4F16  
ctg4375□ctg1997□ctg2520□WAG-105J20  
ctg4375□ctg1997□ctg2520□WAG-117H7  
ctg4375□ctg1997□ctg2520□WAG-128L19  
ctg4375□ctg1997□ctg6359□WAG-18G3  
ctg4375□ctg1997□ctg6359□WAG-124N17  
ctg4375□ctg2863□□WAG-57P17

ctg4375□ctg2863□□WAG-120B2  
ctg4375□ctg2863□ctg3713□WAG-14J1  
ctg4375□ctg2863□ctg3713□WAG-74F10  
ctg4375□ctg2863□ctg3713□WAG-129H12  
ctg4375□ctg344□□WAG-3M21  
ctg4375□ctg344□□WAG-92K19  
ctg4375□ctg344□ctg571□WAG-16J10  
ctg4375□ctg344□ctg571□WAG-46M10  
ctg4375□ctg344□ctg571□WAG-54J21  
ctg4375□ctg344□ctg571□WAG-64E17  
ctg4375□ctg344□ctg571□WAG-104N18  
ctg4375□ctg344□ctg571□WAG-107G19  
ctg4375□ctg344□ctg571□WAG-120F20  
ctg4376□□□WAG-24E3  
ctg4376□ctg2848□□WAG-53A13  
ctg4376□ctg2848□ctg3310□WAG-55M20  
ctg4376□ctg2848□ctg3310□WAG-69J20  
ctg4376□ctg2848□ctg3310□WAG-72E19  
ctg4377□□□WAG-48F14  
ctg4377□□□WAG-58O9  
ctg4377□ctg1292□□WAG-28P18  
ctg4377□ctg1292□□WAG-65H1  
ctg4377□ctg1292□□WAG-82K2  
ctg4377□ctg1292□ctg1146□WAG-93J2  
ctg4377□ctg1292□ctg1146□WAG-102N18  
ctg4377□ctg1292□ctg1146□WAG-106K19  
ctg4377□ctg1292□ctg1146□WAG-112C3  
ctg4377□ctg1292□ctg1600□WAG-19M5  
ctg4377□ctg1292□ctg1600□WAG-50G2  
ctg4377□ctg1292□ctg1600□WAG-52M6  
ctg4377□ctg1292□ctg1600□WAG-94N2  
ctg4377□ctg1292□ctg2070□WAG-41F13  
ctg4377□ctg1292□ctg2070□WAG-46L2  
ctg4377□ctg1292□ctg2070□WAG-51D3  
ctg4377□ctg1292□ctg2070□WAG-72O6  
ctg4377□ctg1292□ctg2070□WAG-79F5  
ctg4377□ctg1292□ctg2070□WAG-118C12  
ctg4378□□□WAG-37D22  
ctg4378□ctg3946□□WAG-110D22  
ctg4378□ctg3946□□WAG-125J9  
ctg4378□ctg3946□ctg5764□WAG-35J7  
ctg4378□ctg3946□ctg5764□WAG-41G20  
ctg4378□ctg709□□WAG-50M6  
ctg4378□ctg709□ctg754□WAG-10C13  
ctg4378□ctg709□ctg754□WAG-25A16  
ctg4378□ctg709□ctg754□WAG-45I19  
ctg4378□ctg709□ctg754□WAG-94H13  
ctg4378□ctg709□ctg754□WAG-97N17  
ctg4379□□□WAG-3K10  
ctg4379□□□WAG-6O24  
ctg4379□□□WAG-14D9  
ctg4379□□□WAG-47K14  
ctg4379□□□WAG-72I9  
ctg4379□ctg1371□ctg1212□WAG-15E17  
ctg4379□ctg1371□ctg1212□WAG-19M9  
ctg4379□ctg1371□ctg1212□WAG-44D13

ctg4379□ctg1371□ctg1212□WAG-64G9  
ctg4379□ctg1371□ctg1212□WAG-71G15  
ctg4379□ctg1371□ctg1212□WAG-111O17  
ctg4379□ctg1371□ctg1212□WAG-121N3  
ctg4379□ctg3853□□WAG-32I3  
ctg4379□ctg3853□ctg4124□WAG-14L10  
ctg4379□ctg3853□ctg4124□WAG-39D22  
ctg4379□ctg3853□ctg4124□WAG-51J11  
ctg4379□ctg4091□ctg4360□WAG-71M5  
ctg4379□ctg4091□ctg4360□WAG-102K16  
ctg4379□ctg4143□□WAG-55K22  
ctg4379□ctg4143□ctg5676□WAG-99P18  
ctg4379□ctg4143□ctg5676□WAG-103H19  
ctg4379□ctg5847□□WAG-13B6  
ctg4379□ctg5847□□WAG-102M2  
ctg4379□ctg6312□□WAG-51E21  
ctg4379□ctg6312□□WAG-74K21  
ctg438□ctg1236□□WAG-35K4  
ctg438□ctg1236□ctg1764□WAG-3C17  
ctg438□ctg1236□ctg1764□WAG-40E18  
ctg438□ctg1236□ctg1764□WAG-44A8  
ctg438□ctg1236□ctg1764□WAG-49B13  
ctg438□ctg1236□ctg1764□WAG-81I19  
ctg438□ctg1236□ctg1764□WAG-122N5  
ctg438□ctg1236□ctg4147□WAG-59G5  
ctg438□ctg1236□ctg4147□WAG-85K17  
ctg438□ctg1236□ctg4147□WAG-117I18  
ctg4380□□□WAG-31H20  
ctg4380□□□WAG-61D23  
ctg4380□ctg3744□□WAG-105F10  
ctg4380□ctg3744□ctg4114□WAG-51E22  
ctg4380□ctg3744□ctg4114□WAG-86D4  
ctg4380□ctg3744□ctg4114□WAG-89A20  
ctg4380□ctg3744□ctg4114□WAG-123H15  
ctg4380□ctg3744□ctg5103□WAG-39F19  
ctg4380□ctg3744□ctg5103□WAG-82P23  
ctg4381□ctg2572□□WAG-6E21  
ctg4381□ctg2572□□WAG-61B24  
ctg4381□ctg2572□ctg3216□WAG-18H20  
ctg4381□ctg2572□ctg3216□WAG-100G6  
ctg4381□ctg2572□ctg3216□WAG-128N3  
ctg4382□ctg2547□□WAG-99E11  
ctg4382□ctg2547□ctg3178□WAG-48J8  
ctg4382□ctg2547□ctg3178□WAG-67C8  
ctg4382□ctg2547□ctg3178□WAG-87P19  
ctg4382□ctg2547□ctg3178□WAG-91H2  
ctg4382□ctg2547□ctg3178□WAG-113E13  
ctg4383□□□WAG-10G22  
ctg4383□□□WAG-113L14  
ctg4383□ctg2963□□WAG-126C4  
ctg4383□ctg2963□ctg4030□WAG-81O16  
ctg4383□ctg2963□ctg4030□WAG-91G16  
ctg4383□ctg725□□WAG-75D1  
ctg4383□ctg725□ctg842□WAG-15D3  
ctg4383□ctg725□ctg842□WAG-16N12  
ctg4383□ctg725□ctg842□WAG-24I4

ctg4383□ctg725□ctg842□WAG-41L23  
ctg4383□ctg725□ctg842□WAG-88H16  
ctg4383□ctg725□ctg842□WAG-119H4  
ctg4383□ctg725□ctg842□WAG-127A19  
ctg4383□ctg725□ctg842□WAG-128F18  
ctg4384□ctg2412□ctg2312□WAG-83A16  
ctg4384□ctg2412□ctg2312□WAG-95P22  
ctg4384□ctg2412□ctg2312□WAG-101G8  
ctg4384□ctg2412□ctg2312□WAG-101J23  
ctg4384□ctg2412□ctg2312□WAG-109I2  
ctg4385□ctg2881□□WAG-109L22  
ctg4385□ctg2881□ctg2871□WAG-18C4  
ctg4385□ctg2881□ctg2871□WAG-113E22  
ctg4385□ctg2881□ctg2871□WAG-129H11  
ctg4386□□□WAG-26H10  
ctg4386□ctg1944□□WAG-15J22  
ctg4386□ctg1944□□WAG-36N17  
ctg4386□ctg1944□□WAG-67I5  
ctg4386□ctg1944□ctg2330□WAG-47F10  
ctg4386□ctg1944□ctg2330□WAG-118E8  
ctg4386□ctg1944□ctg2330□WAG-128K13  
ctg4386□ctg5412□ctg6424□WAG-31I11  
ctg4386□ctg5412□ctg6424□WAG-111H6  
ctg4386□ctg927□□WAG-56B8  
ctg4386□ctg927□ctg1033□WAG-7C18  
ctg4386□ctg927□ctg1033□WAG-25E20  
ctg4386□ctg927□ctg1033□WAG-113O11  
ctg4386□ctg927□ctg1033□WAG-126D19  
ctg4386□ctg927□ctg1033□WAG-126K11  
ctg4387□ctg1143□□WAG-31M10  
ctg4387□ctg1143□□WAG-64F2  
ctg4387□ctg1143□□WAG-129H19  
ctg4387□ctg1143□ctg1509□WAG-11B1  
ctg4387□ctg1143□ctg1509□WAG-50O10  
ctg4387□ctg1143□ctg1509□WAG-67F17  
ctg4387□ctg1143□ctg1509□WAG-88B22  
ctg4387□ctg1143□ctg1509□WAG-104D21  
ctg4387□ctg2623□ctg2738□WAG-32I6  
ctg4387□ctg2623□ctg2738□WAG-60E16  
ctg4387□ctg2623□ctg2738□WAG-66L5  
ctg4387□ctg2623□ctg2738□WAG-68M16  
ctg4387□ctg2623□ctg2738□WAG-76H19  
ctg4387□ctg2623□ctg2943□WAG-29F1  
ctg4387□ctg2623□ctg2943□WAG-52B1  
ctg4387□ctg2623□ctg2943□WAG-90K3  
ctg4388□ctg2250□□WAG-57M4  
ctg4388□ctg2250□□WAG-108O23  
ctg4388□ctg2250□ctg3806□WAG-53G11  
ctg4388□ctg2250□ctg3806□WAG-65G16  
ctg4388□ctg2250□ctg3806□WAG-92G11  
ctg4388□ctg2250□ctg3806□WAG-114G6  
ctg4389□□□WAG-5M12  
ctg4389□□□WAG-93A8  
ctg4389□ctg1708□□WAG-21E23  
ctg4389□ctg1708□□WAG-28K13  
ctg4389□ctg1708□ctg2080□WAG-48A20

ctg4389□ctg1708□ctg2080□WAG-85M9  
ctg4389□ctg1708□ctg2080□WAG-89C13  
ctg4389□ctg1708□ctg6222□WAG-22K22  
ctg4389□ctg1708□ctg6222□WAG-46C4  
ctg4389□ctg2217□ctg2094□WAG-13C18  
ctg4389□ctg2217□ctg2094□WAG-29E17  
ctg4389□ctg2217□ctg2094□WAG-44I23  
ctg4389□ctg2217□ctg2094□WAG-115O16  
ctg4389□ctg2516□□WAG-15L2  
ctg4389□ctg2516□ctg2540□WAG-26B19  
ctg4389□ctg2516□ctg2540□WAG-44C16  
ctg4389□ctg2516□ctg2540□WAG-65D17  
ctg4389□ctg2516□ctg2540□WAG-87C16  
ctg4389□ctg2516□ctg2540□WAG-108J12  
ctg4389□ctg2905□□WAG-37K4  
ctg4389□ctg2905□ctg3787□WAG-117L9  
ctg4389□ctg2905□ctg3787□WAG-126I21  
ctg4389□ctg2905□ctg3787□WAG-130M8  
ctg4389□ctg953□ctg805□WAG-17B5  
ctg4389□ctg953□ctg805□WAG-34C15  
ctg4389□ctg953□ctg805□WAG-40F6  
ctg4389□ctg953□ctg805□WAG-43N22  
ctg4389□ctg953□ctg805□WAG-62J5  
ctg4389□ctg953□ctg805□WAG-66O8  
ctg439□□□WAG-45G5  
ctg439□□□WAG-108M21  
ctg439□ctg1198□ctg1044□WAG-24A7  
ctg439□ctg1198□ctg1044□WAG-24J14  
ctg439□ctg1198□ctg1044□WAG-72G8  
ctg439□ctg1198□ctg1044□WAG-104B18  
ctg439□ctg1643□ctg2692□WAG-70M12  
ctg439□ctg1643□ctg2692□WAG-96E20  
ctg439□ctg1643□ctg2692□WAG-125P7  
ctg439□ctg1643□ctg6320□WAG-76L20  
ctg439□ctg1643□ctg6320□WAG-118I18  
ctg4390□□□WAG-110H20  
ctg4390□ctg2562□ctg2502□WAG-1M3  
ctg4390□ctg2562□ctg2502□WAG-89L20  
ctg4390□ctg2562□ctg2502□WAG-95F12  
ctg4390□ctg2562□ctg2502□WAG-105L23  
ctg4390□ctg2562□ctg2502□WAG-114C20  
ctg4390□ctg323□□WAG-1F2  
ctg4390□ctg323□ctg394□WAG-10C6  
ctg4390□ctg323□ctg394□WAG-25C14  
ctg4390□ctg323□ctg394□WAG-73G15  
ctg4390□ctg323□ctg394□WAG-74N14  
ctg4390□ctg323□ctg394□WAG-75B7  
ctg4390□ctg323□ctg394□WAG-87O9  
ctg4390□ctg323□ctg394□WAG-120P21  
ctg4390□ctg323□ctg394□WAG-125P15  
ctg4390□ctg5052□ctg5580□WAG-14L14  
ctg4390□ctg5052□ctg5580□WAG-120C24  
ctg4391□ctg2150□□WAG-60L12  
ctg4391□ctg2150□ctg2029□WAG-11D15  
ctg4391□ctg2150□ctg2029□WAG-23J10  
ctg4391□ctg2150□ctg2029□WAG-36G12

ctg4391□ctg2150□ctg2029□WAG-84H20  
ctg4391□ctg2150□ctg6173□WAG-49D20  
ctg4391□ctg2150□ctg6173□WAG-129E24  
ctg4391□ctg940□ctg1114□WAG-16P23  
ctg4391□ctg940□ctg1114□WAG-70C23  
ctg4391□ctg940□ctg1114□WAG-86K15  
ctg4391□ctg940□ctg1114□WAG-124L16  
ctg4391□ctg940□ctg1721□WAG-10K22  
ctg4391□ctg940□ctg1721□WAG-12M13  
ctg4391□ctg940□ctg1721□WAG-37G6  
ctg4391□ctg940□ctg1721□WAG-74A16  
ctg4391□ctg940□ctg1721□WAG-122P5  
ctg4392□ctg2120□□WAG-44J21  
ctg4392□ctg2120□ctg2595□WAG-52B23  
ctg4392□ctg2120□ctg2595□WAG-93L9  
ctg4392□ctg2120□ctg2595□WAG-114J23  
ctg4393□□□WAG-E2  
ctg4393□□□WAG-93G13  
ctg4393□□□WAG-109F24  
ctg4393□ctg2393□□WAG-70G24  
ctg4393□ctg2393□ctg3320□WAG-13B1  
ctg4393□ctg2393□ctg3320□WAG-56A24  
ctg4393□ctg2393□ctg3320□WAG-83B12  
ctg4393□ctg2393□ctg4217□WAG-72I21  
ctg4393□ctg2393□ctg4217□WAG-78K1  
ctg4393□ctg2393□ctg5847□WAG-102K6  
ctg4393□ctg2393□ctg5847□WAG-119J13  
ctg4393□ctg429□ctg526□WAG-21D16  
ctg4393□ctg429□ctg526□WAG-30M13  
ctg4393□ctg429□ctg526□WAG-37J13  
ctg4393□ctg429□ctg526□WAG-37N1  
ctg4393□ctg429□ctg526□WAG-46C14  
ctg4393□ctg429□ctg526□WAG-66D18  
ctg4393□ctg429□ctg526□WAG-90E15  
ctg4393□ctg429□ctg526□WAG-98E4  
ctg4393□ctg429□ctg526□WAG-130G17  
ctg4394□ctg114□ctg111□WAG-42C22  
ctg4394□ctg114□ctg111□WAG-42K18  
ctg4394□ctg114□ctg111□WAG-48J19  
ctg4394□ctg114□ctg111□WAG-51D21  
ctg4394□ctg114□ctg111□WAG-52K20  
ctg4394□ctg114□ctg111□WAG-58B24  
ctg4394□ctg114□ctg111□WAG-81A10  
ctg4394□ctg114□ctg111□WAG-85J4  
ctg4394□ctg114□ctg111□WAG-87P13  
ctg4394□ctg114□ctg111□WAG-90O8  
ctg4394□ctg114□ctg111□WAG-103P9  
ctg4394□ctg114□ctg111□WAG-112K24  
ctg4394□ctg114□ctg111□WAG-122N7  
ctg4394□ctg114□ctg111□WAG-125N3  
ctg4394□ctg114□ctg111□WAG-127M24  
ctg4394□ctg114□ctg4094□WAG-67N15  
ctg4394□ctg114□ctg4094□WAG-112H15  
ctg4394□ctg114□ctg4094□WAG-128N16  
ctg4394□ctg281□ctg1626□WAG-67O11  
ctg4394□ctg281□ctg1626□WAG-85A12

ctg4394□ctg281□ctg1626□WAG-110F16  
ctg4394□ctg281□ctg1626□WAG-119E11  
ctg4394□ctg281□ctg1626□WAG-123G20  
ctg4394□ctg281□ctg217□WAG-8A8  
ctg4394□ctg281□ctg217□WAG-12D18  
ctg4394□ctg281□ctg217□WAG-26J17  
ctg4394□ctg281□ctg217□WAG-26K19  
ctg4394□ctg281□ctg217□WAG-29I9  
ctg4394□ctg281□ctg217□WAG-37H23  
ctg4394□ctg281□ctg217□WAG-39F9  
ctg4394□ctg281□ctg217□WAG-43F9  
ctg4394□ctg281□ctg217□WAG-50G8  
ctg4394□ctg281□ctg217□WAG-57G21  
ctg4394□ctg281□ctg217□WAG-60I2  
ctg4394□ctg281□ctg217□WAG-87O23  
ctg4394□ctg281□ctg217□WAG-102O21  
ctg4394□ctg281□ctg217□WAG-104B5  
ctg4394□ctg281□ctg217□WAG-105O21  
ctg4394□ctg281□ctg217□WAG-116H10  
ctg4394□ctg281□ctg217□WAG-120J13  
ctg4394□ctg281□ctg217□WAG-122A13  
ctg4394□ctg281□ctg217□WAG-122B22  
ctg4394□ctg281□ctg217□WAG-130P22  
ctg4394□ctg281□ctg6974□WAG-9E22  
ctg4394□ctg281□ctg6974□WAG-9O12  
ctg4394□ctg281□ctg6974□WAG-15G8  
ctg4394□ctg281□ctg6974□WAG-31J18  
ctg4394□ctg281□ctg6974□WAG-54M23  
ctg4394□ctg281□ctg6974□WAG-72D14  
ctg4394□ctg281□ctg6974□WAG-89D24  
ctg4394□ctg281□ctg6974□WAG-104J21  
ctg4394□ctg281□ctg6974□WAG-105H8  
ctg4394□ctg281□ctg6974□WAG-106K4  
ctg4395□□□WAG-69H24  
ctg4395□□□WAG-80O12  
ctg4395□ctg1164□□WAG-127K13  
ctg4395□ctg1164□ctg1011□WAG-2N9  
ctg4395□ctg1164□ctg1011□WAG-11K20  
ctg4395□ctg1164□ctg1011□WAG-59L10  
ctg4395□ctg1164□ctg1011□WAG-128A1  
ctg4395□ctg1164□ctg1011□WAG-129E5  
ctg4395□ctg1164□ctg3977□WAG-35D11  
ctg4395□ctg1164□ctg3977□WAG-93H23  
ctg4395□ctg1164□ctg3977□WAG-119G20  
ctg4395□ctg1950□ctg1795□WAG-10G24  
ctg4395□ctg1950□ctg1795□WAG-19L19  
ctg4395□ctg1950□ctg1795□WAG-105O10  
ctg4395□ctg1950□ctg1795□WAG-118J20  
ctg4395□ctg580□□WAG-81D8  
ctg4395□ctg580□ctg628□WAG-44C19  
ctg4395□ctg580□ctg628□WAG-48L21  
ctg4395□ctg580□ctg628□WAG-81H20  
ctg4395□ctg580□ctg628□WAG-91D16  
ctg4395□ctg580□ctg628□WAG-122J6  
ctg4395□ctg5891□□WAG-84K4  
ctg4395□ctg5891□□WAG-118K14

ctg4395□ctg670□ctg544□WAG-56F16  
ctg4395□ctg670□ctg544□WAG-58D11  
ctg4395□ctg670□ctg544□WAG-91L6  
ctg4395□ctg670□ctg544□WAG-93J21  
ctg4395□ctg670□ctg544□WAG-98G4  
ctg4395□ctg670□ctg544□WAG-106N20  
ctg4396□□□WAG-22G11  
ctg4396□□□WAG-37F2  
ctg4396□ctg1814□□WAG-19A13  
ctg4396□ctg1814□ctg1640□WAG-40E20  
ctg4396□ctg1814□ctg1640□WAG-53B12  
ctg4396□ctg1814□ctg1640□WAG-58K11  
ctg4396□ctg1814□ctg1640□WAG-78M17  
ctg4396□ctg1927□ctg1763□WAG-8O4  
ctg4396□ctg1927□ctg1763□WAG-19C19  
ctg4396□ctg1927□ctg1763□WAG-49H5  
ctg4396□ctg1927□ctg1763□WAG-101J11  
ctg4396□ctg1927□ctg1763□WAG-115J13  
ctg4396□ctg2418□ctg2322□WAG-26O12  
ctg4396□ctg2418□ctg2322□WAG-43H4  
ctg4396□ctg2418□ctg2322□WAG-63K15  
ctg4396□ctg2418□ctg2322□WAG-80B6  
ctg4396□ctg4674□□WAG-43P13  
ctg4396□ctg4674□□WAG-84E17  
ctg4396□ctg4674□□WAG-120H6  
ctg4397□□□WAG-10B20  
ctg4397□□□WAG-86P8  
ctg4397□ctg2276□□WAG-12I13  
ctg4397□ctg2276□□WAG-16G16  
ctg4397□ctg2276□□WAG-27D8  
ctg4397□ctg2276□ctg2205□WAG-1B23  
ctg4397□ctg2276□ctg2205□WAG-4G2  
ctg4397□ctg2276□ctg2205□WAG-5O17  
ctg4397□ctg2276□ctg2205□WAG-11E18  
ctg4397□ctg2276□ctg2205□WAG-58A22  
ctg4397□ctg2276□ctg2205□WAG-66L11  
ctg4397□ctg2276□ctg2205□WAG-79H18  
ctg4397□ctg2276□ctg2205□WAG-110N8  
ctg4398□□□WAG-118O1  
ctg4398□□□WAG-123I19  
ctg4398□ctg1866□ctg2203□WAG-46E6  
ctg4398□ctg1866□ctg2203□WAG-103B15  
ctg4398□ctg1866□ctg2203□WAG-110I9  
ctg4398□ctg1866□ctg3411□WAG-17I7  
ctg4398□ctg1866□ctg3411□WAG-67B17  
ctg4398□ctg1866□ctg3411□WAG-87A5  
ctg4398□ctg1866□ctg6448□WAG-51M13  
ctg4398□ctg1866□ctg6448□WAG-117O21  
ctg4399□□□WAG-114I14  
ctg4399□ctg1851□ctg1683□WAG-53F7  
ctg4399□ctg1851□ctg1683□WAG-107M10  
ctg4399□ctg1851□ctg1683□WAG-111I9  
ctg4399□ctg1851□ctg1683□WAG-129G14  
ctg4399□ctg1851□ctg1683□WAG-129P9  
ctg44□□□WAG-5G14  
ctg44□□□WAG-6B15



ctg44□□□WAG-85F11  
ctg44□□□WAG-124E12  
ctg44□ctg1914□□WAG-88O15  
ctg44□ctg1914□ctg2278□WAG-43M12  
ctg44□ctg1914□ctg2278□WAG-61I23  
ctg44□ctg1914□ctg2278□WAG-118G19  
ctg44□ctg3503□ctg3629□WAG-56E16  
ctg44□ctg3503□ctg3629□WAG-60A9  
ctg44□ctg3503□ctg3629□WAG-123H4  
ctg44□ctg4075□ctg4347□WAG-47B24  
ctg44□ctg4075□ctg4347□WAG-79B3  
ctg44□ctg4403□ctg4571□WAG-13P19  
ctg44□ctg4403□ctg4571□WAG-109J9  
ctg440□ctg1352□ctg1196□WAG-13E18  
ctg440□ctg1352□ctg1196□WAG-13N7  
ctg440□ctg1352□ctg1196□WAG-26M15  
ctg440□ctg1352□ctg1196□WAG-108F22  
ctg440□ctg1352□ctg1196□WAG-111F11  
ctg440□ctg1616□ctg1470□WAG-44L15  
ctg440□ctg1616□ctg1470□WAG-83J8  
ctg440□ctg1616□ctg1470□WAG-113E6  
ctg4400□□□WAG-3I19  
ctg4400□ctg1815□□WAG-13D19  
ctg4400□ctg1815□□WAG-38I11  
ctg4400□ctg1815□□WAG-88O6  
ctg4400□ctg1815□ctg1661□WAG-29F13  
ctg4400□ctg1815□ctg1661□WAG-51K16  
ctg4400□ctg1815□ctg1661□WAG-86L11  
ctg4400□ctg1815□ctg1661□WAG-96B7  
ctg4400□ctg3647□□WAG-120D12  
ctg4400□ctg3647□ctg4776□WAG-38C6  
ctg4400□ctg3647□ctg4776□WAG-42G21  
ctg4401□ctg1799□ctg2208□WAG-10J7  
ctg4401□ctg1799□ctg2208□WAG-12C19  
ctg4401□ctg1799□ctg2208□WAG-23G20  
ctg4401□ctg1799□ctg2208□WAG-58O16  
ctg4401□ctg1799□ctg2208□WAG-66G9  
ctg4401□ctg1799□ctg2208□WAG-89K20  
ctg4401□ctg1799□ctg2208□WAG-104E3  
ctg4402□□□WAG-9M8  
ctg4402□ctg1776□□WAG-27N9  
ctg4402□ctg1776□ctg2196□WAG-84K7  
ctg4402□ctg1776□ctg2196□WAG-102L5  
ctg4402□ctg1776□ctg2196□WAG-110C10  
ctg4402□ctg1776□ctg3556□WAG-14O14  
ctg4402□ctg1776□ctg3556□WAG-96H6  
ctg4402□ctg1776□ctg3556□WAG-98I10  
ctg4402□ctg1776□ctg5474□WAG-17C12  
ctg4402□ctg1776□ctg5474□WAG-85M17  
ctg4402□ctg3439□□WAG-22O8  
ctg4402□ctg3439□□WAG-51N1  
ctg4402□ctg3439□ctg3694□WAG-33K19  
ctg4402□ctg3439□ctg3694□WAG-54K16  
ctg4402□ctg3439□ctg3694□WAG-68B12  
ctg4403□□□WAG-82O3  
ctg4403□□□WAG-95O20

ctg4403□ctg2101□□WAG-24J15  
ctg4403□ctg2101□□WAG-70B5  
ctg4403□ctg2101□□WAG-78J12  
ctg4403□ctg2101□ctg3417□WAG-54M4  
ctg4403□ctg2101□ctg3417□WAG-73B13  
ctg4403□ctg2101□ctg4447□WAG-70A6  
ctg4403□ctg2101□ctg4447□WAG-90I7  
ctg4404□□□WAG-102A5  
ctg4404□ctg2030□ctg2456□WAG-23A2  
ctg4404□ctg2030□ctg2456□WAG-34D8  
ctg4404□ctg2030□ctg2456□WAG-67F18  
ctg4404□ctg2030□ctg2456□WAG-92O15  
ctg4404□ctg2030□ctg2456□WAG-107L9  
ctg4405□ctg2229□ctg2123□WAG-55M8  
ctg4405□ctg2229□ctg2123□WAG-70E18  
ctg4405□ctg2229□ctg2123□WAG-118D3  
ctg4405□ctg2229□ctg2123□WAG-120P22  
ctg4405□ctg6470□□WAG-66N16  
ctg4405□ctg6470□□WAG-73M15  
ctg4406□□□WAG-83D6  
ctg4406□ctg2420□ctg2328□WAG-31E7  
ctg4406□ctg2420□ctg2328□WAG-78I21  
ctg4406□ctg2420□ctg2328□WAG-125J14  
ctg4406□ctg6488□□WAG-6C7  
ctg4406□ctg6488□□WAG-72J19  
ctg4407□□□WAG-43M24  
ctg4407□ctg1996□ctg2401□WAG-60K18  
ctg4407□ctg1996□ctg2401□WAG-73G4  
ctg4407□ctg1996□ctg2401□WAG-100N12  
ctg4407□ctg1996□ctg2401□WAG-114B20  
ctg4407□ctg3911□□WAG-2I3  
ctg4407□ctg3911□ctg5684□WAG-41F1  
ctg4407□ctg3911□ctg5684□WAG-55H21  
ctg4407□ctg6223□□WAG-14L4  
ctg4407□ctg6223□□WAG-115M5  
ctg4407□ctg6242□□WAG-66N4  
ctg4407□ctg6242□□WAG-80G17  
ctg4408□ctg1952□□WAG-19F23  
ctg4408□ctg1952□ctg3127□WAG-50O15  
ctg4408□ctg1952□ctg3127□WAG-53E1  
ctg4408□ctg1952□ctg3127□WAG-70H8  
ctg4408□ctg1952□ctg4912□WAG-21O13  
ctg4408□ctg1952□ctg4912□WAG-130G19  
ctg4408□ctg2477□ctg2397□WAG-49K8  
ctg4408□ctg2477□ctg2397□WAG-52P19  
ctg4408□ctg2477□ctg2397□WAG-73E2  
ctg4408□ctg2477□ctg2397□WAG-95J14  
ctg4409□□□WAG-D3  
ctg4409□□□WAG-25G7  
ctg4409□□□WAG-101A10  
ctg4409□ctg1433□□WAG-3P22  
ctg4409□ctg1433□ctg2177□WAG-21E9  
ctg4409□ctg1433□ctg2177□WAG-54E22  
ctg4409□ctg1433□ctg2177□WAG-69D12  
ctg4409□ctg1433□ctg2177□WAG-72D22  
ctg4409□ctg1433□ctg2177□WAG-73H24

ctg4409□ctg1433□ctg2177□WAG-101H23  
ctg4409□ctg1433□ctg2177□WAG-112A13  
ctg4409□ctg1573□□WAG-106D24  
ctg4409□ctg1573□ctg1874□WAG-15L15  
ctg4409□ctg1573□ctg1874□WAG-69O19  
ctg4409□ctg1573□ctg1874□WAG-109A17  
ctg4409□ctg1573□ctg1874□WAG-113E7  
ctg4409□ctg1573□ctg5475□WAG-13I12  
ctg4409□ctg1573□ctg5475□WAG-13K10  
ctg4409□ctg1918□□WAG-13E10  
ctg4409□ctg1918□□WAG-66I19  
ctg4409□ctg1918□□WAG-101B15  
ctg4409□ctg1918□ctg2396□WAG-12B2  
ctg4409□ctg1918□ctg2396□WAG-41P19  
ctg4409□ctg1918□ctg2396□WAG-50K19  
ctg4409□ctg1918□ctg2396□WAG-93M13  
ctg4409□ctg1941□□WAG-56M17  
ctg4409□ctg1941□□WAG-108K22  
ctg4409□ctg1941□ctg2687□WAG-19K24  
ctg4409□ctg1941□ctg2687□WAG-28G1  
ctg4409□ctg1941□ctg2687□WAG-54K18  
ctg4409□ctg1941□ctg2687□WAG-72L4  
ctg4409□ctg1941□ctg2687□WAG-103D15  
ctg4409□ctg2834□□WAG-28I12  
ctg4409□ctg2834□□WAG-113M12  
ctg4409□ctg2834□ctg3662□WAG-30B3  
ctg4409□ctg2834□ctg3662□WAG-43E21  
ctg4409□ctg2834□ctg3662□WAG-46N5  
ctg4409□ctg2834□ctg3662□WAG-68G20  
ctg4409□ctg2855□ctg2841□WAG-37C20  
ctg4409□ctg2855□ctg2841□WAG-43A18  
ctg4409□ctg2855□ctg2841□WAG-90E12  
ctg4409□ctg3019□ctg3738□WAG-26M13  
ctg4409□ctg3019□ctg3738□WAG-63P15  
ctg4409□ctg3019□ctg3738□WAG-76E1  
ctg4409□ctg3019□ctg5032□WAG-68A18  
ctg4409□ctg3019□ctg5032□WAG-85D17  
ctg4409□ctg3179□ctg3196□WAG-99C12  
ctg4409□ctg3179□ctg3196□WAG-103D13  
ctg4409□ctg3179□ctg3196□WAG-117E11  
ctg4409□ctg3242□ctg4278□WAG-11N22  
ctg4409□ctg3242□ctg4278□WAG-32K16  
ctg4409□ctg3242□ctg4278□WAG-56L20  
ctg4409□ctg3242□ctg4278□WAG-110F22  
ctg4409□ctg3815□□WAG-19A21  
ctg4409□ctg3815□□WAG-122B21  
ctg4409□ctg3815□ctg5322□WAG-72C9  
ctg4409□ctg3815□ctg5322□WAG-129E13  
ctg4409□ctg3815□ctg6538□WAG-68A3  
ctg4409□ctg3815□ctg6538□WAG-104N24  
ctg441□ctg1585□ctg1431□WAG-47F1  
ctg441□ctg1585□ctg1431□WAG-65P12  
ctg441□ctg1585□ctg1431□WAG-103G6  
ctg441□ctg1585□ctg1431□WAG-128P21  
ctg441□ctg4627□ctg4792□WAG-66C9  
ctg441□ctg4627□ctg4792□WAG-92H23

ctg441□ctg6468□□WAG-74H7  
ctg441□ctg6468□□WAG-80P11  
ctg4410□ctg1951□□WAG-107E13  
ctg4410□ctg1951□ctg1806□WAG-27N17  
ctg4410□ctg1951□ctg1806□WAG-46F6  
ctg4410□ctg1951□ctg1806□WAG-52P3  
ctg4410□ctg1951□ctg1806□WAG-77C8  
ctg4410□ctg1951□ctg1806□WAG-85C22  
ctg4410□ctg1951□ctg1806□WAG-91M10  
ctg4410□ctg1951□ctg1806□WAG-91M11  
ctg4410□ctg1951□ctg1806□WAG-91N11  
ctg4411□□□WAG-96A11  
ctg4411□ctg1820□□WAG-55G22  
ctg4411□ctg1820□ctg1995□WAG-4N18  
ctg4411□ctg1820□ctg1995□WAG-7C10  
ctg4411□ctg1820□ctg1995□WAG-10H13  
ctg4411□ctg1820□ctg1995□WAG-57J15  
ctg4411□ctg1820□ctg1995□WAG-57M16  
ctg4411□ctg1820□ctg1995□WAG-60H5  
ctg4411□ctg1820□ctg1995□WAG-103H6  
ctg4411□ctg1820□ctg1995□WAG-123A6  
ctg4411□ctg5257□ctg6062□WAG-17H19  
ctg4411□ctg5257□ctg6062□WAG-95D15  
ctg4412□ctg1541□□WAG-22D22  
ctg4412□ctg1541□ctg1387□WAG-10M1  
ctg4412□ctg1541□ctg1387□WAG-44A14  
ctg4412□ctg1541□ctg1387□WAG-56E1  
ctg4412□ctg1541□ctg1387□WAG-101A6  
ctg4413□□□WAG-7A18  
ctg4413□□□WAG-32K18  
ctg4413□ctg1508□ctg1354□WAG-21B5  
ctg4413□ctg1508□ctg1354□WAG-37B18  
ctg4413□ctg1508□ctg1354□WAG-64F4  
ctg4413□ctg1508□ctg1354□WAG-77G5  
ctg4413□ctg1508□ctg1354□WAG-94D22  
ctg4414□ctg1486□ctg1335□WAG-50J4  
ctg4414□ctg1486□ctg1335□WAG-73L23  
ctg4414□ctg1486□ctg1335□WAG-74H15  
ctg4414□ctg1486□ctg1335□WAG-76N8  
ctg4415□□□WAG-126L17  
ctg4415□ctg1446□□WAG-57C11  
ctg4415□ctg1446□□WAG-63C6  
ctg4415□ctg1446□□WAG-82C8  
ctg4415□ctg1446□ctg1624□WAG-62J20  
ctg4415□ctg1446□ctg1624□WAG-67D22  
ctg4415□ctg1446□ctg1624□WAG-99F18  
ctg4415□ctg1446□ctg1624□WAG-118D8  
ctg4415□ctg1446□ctg1624□WAG-128K19  
ctg4415□ctg1446□ctg3772□WAG-7O10  
ctg4415□ctg1446□ctg3772□WAG-41P10  
ctg4415□ctg1446□ctg3772□WAG-66M8  
ctg4416□□□WAG-6M2  
ctg4416□□□WAG-48D20  
ctg4416□□□WAG-74P24  
ctg4416□□□WAG-124O6  
ctg4416□ctg1367□□WAG-12C16

ctg4416□ctg1367□□WAG-15K20  
ctg4416□ctg1367□□WAG-69I9  
ctg4416□ctg1367□□WAG-77M20  
ctg4416□ctg1367□□WAG-95M11  
ctg4416□ctg1367□□WAG-124N9  
ctg4416□ctg1367□ctg2675□WAG-2E23  
ctg4416□ctg1367□ctg2675□WAG-14O4  
ctg4416□ctg1367□ctg2675□WAG-28L19  
ctg4416□ctg1367□ctg2675□WAG-72D24  
ctg4416□ctg1367□ctg2675□WAG-89H9  
ctg4416□ctg1367□ctg6323□WAG-69P16  
ctg4416□ctg1367□ctg6323□WAG-74P10  
ctg4416□ctg1425□□WAG-111F5  
ctg4416□ctg1425□ctg2258□WAG-4P18  
ctg4416□ctg1425□ctg2258□WAG-36M5  
ctg4416□ctg1425□ctg2258□WAG-36M20  
ctg4416□ctg1425□ctg2258□WAG-95K18  
ctg4416□ctg1425□ctg2258□WAG-114J16  
ctg4416□ctg1425□ctg3299□WAG-38H8  
ctg4416□ctg1425□ctg3299□WAG-86E12  
ctg4416□ctg1425□ctg3299□WAG-95E11  
ctg4416□ctg1425□ctg3299□WAG-99I6  
ctg4416□ctg1425□ctg3299□WAG-102J19  
ctg4416□ctg1425□ctg4786□WAG-126K16  
ctg4416□ctg1425□ctg4786□WAG-128M2  
ctg4416□ctg1425□ctg6673□WAG-94M23  
ctg4416□ctg1425□ctg6673□WAG-121B20  
ctg4417□ctg1421□□WAG-81C2  
ctg4417□ctg1421□ctg1665□WAG-11N1  
ctg4417□ctg1421□ctg1665□WAG-21B9  
ctg4417□ctg1421□ctg1665□WAG-31C14  
ctg4417□ctg1421□ctg1665□WAG-51E11  
ctg4417□ctg1421□ctg1665□WAG-63J7  
ctg4418□□□WAG-22K23  
ctg4418□□□WAG-55E18  
ctg4418□□□WAG-61O18  
ctg4418□□□WAG-75I13  
ctg4418□□□WAG-104K3  
ctg4418□□□WAG-118O19  
ctg4418□□□WAG-122B9  
ctg4418□ctg1683□ctg1962□WAG-18E22  
ctg4418□ctg1683□ctg1962□WAG-27H21  
ctg4418□ctg1683□ctg1962□WAG-96H4  
ctg4418□ctg1683□ctg1962□WAG-123I14  
ctg4418□ctg1683□ctg1962□WAG-127M2  
ctg4418□ctg1683□ctg2880□WAG-31C17  
ctg4418□ctg1683□ctg2880□WAG-47H13  
ctg4418□ctg1683□ctg2880□WAG-91A4  
ctg4418□ctg1683□ctg2880□WAG-93L11  
ctg4418□ctg2201□□WAG-13G4  
ctg4418□ctg2201□□WAG-120E15  
ctg4418□ctg2201□ctg3147□WAG-42E9  
ctg4418□ctg2201□ctg3147□WAG-48A24  
ctg4418□ctg2201□ctg3147□WAG-100F5  
ctg4418□ctg3001□□WAG-95F7  
ctg4418□ctg3001□ctg3915□WAG-37G21

ctg4418□ctg3001□ctg3915□WAG-77P8  
ctg4418□ctg3001□ctg3915□WAG-99N4  
ctg4418□ctg6374□□WAG-40F15  
ctg4418□ctg6374□□WAG-116P3  
ctg4418□ctg949□□WAG-27J15  
ctg4418□ctg949□□WAG-77K24  
ctg4418□ctg949□ctg1041□WAG-15H9  
ctg4418□ctg949□ctg1041□WAG-33B24  
ctg4418□ctg949□ctg1041□WAG-61N7  
ctg4418□ctg949□ctg1041□WAG-71D9  
ctg4418□ctg949□ctg1041□WAG-89J18  
ctg4418□ctg949□ctg1041□WAG-100J23  
ctg4418□ctg949□ctg1041□WAG-102C16  
ctg4419□□□WAG-24H20  
ctg4419□□□WAG-45M12  
ctg4419□□□WAG-51D16  
ctg4419□□□WAG-129B12  
ctg4419□ctg1054□□WAG-75A10  
ctg4419□ctg1054□□WAG-94F19  
ctg4419□ctg1054□ctg1183□WAG-34A22  
ctg4419□ctg1054□ctg1183□WAG-38A8  
ctg4419□ctg1054□ctg1183□WAG-56O13  
ctg4419□ctg1054□ctg1183□WAG-91N14  
ctg4419□ctg1054□ctg1183□WAG-97C11  
ctg4419□ctg1054□ctg1183□WAG-119D13  
ctg4419□ctg1054□ctg1183□WAG-126G10  
ctg4419□ctg1054□ctg1784□WAG-9K23  
ctg4419□ctg1054□ctg1784□WAG-25F13  
ctg4419□ctg1054□ctg1784□WAG-33N13  
ctg4419□ctg1054□ctg1784□WAG-34B7  
ctg4419□ctg1054□ctg1784□WAG-40L22  
ctg4419□ctg1054□ctg1784□WAG-87N21  
ctg4419□ctg1054□ctg1784□WAG-96O8  
ctg4419□ctg2430□□WAG-64A20  
ctg4419□ctg2430□□WAG-80I9  
ctg4419□ctg2430□□WAG-100M11  
ctg4419□ctg2430□□WAG-105A3  
ctg4419□ctg2430□ctg3960□WAG-26F11  
ctg4419□ctg2430□ctg3960□WAG-47B12  
ctg4419□ctg2430□ctg3960□WAG-71L24  
ctg442□ctg1251□□WAG-101J21  
ctg442□ctg1251□ctg1464□WAG-58I9  
ctg442□ctg1251□ctg1464□WAG-72A21  
ctg442□ctg1251□ctg1464□WAG-74C7  
ctg442□ctg1251□ctg1464□WAG-87P16  
ctg442□ctg1251□ctg1464□WAG-89M15  
ctg4420□□□WAG-85E13  
ctg4420□□□WAG-128A20  
ctg4420□ctg1856□□WAG-17J10  
ctg4420□ctg1856□ctg2973□WAG-42P1  
ctg4420□ctg1856□ctg2973□WAG-65L8  
ctg4420□ctg1856□ctg2973□WAG-104P21  
ctg4420□ctg1856□ctg2973□WAG-107F5  
ctg4420□ctg3452□□WAG-70P16  
ctg4420□ctg3452□ctg3564□WAG-35L14  
ctg4420□ctg3452□ctg3564□WAG-80F7

ctg4420□ctg3452□ctg3564□WAG-83B20  
ctg4420□ctg4575□□WAG-28C18  
ctg4420□ctg4575□□WAG-33E10  
ctg4420□ctg4575□□WAG-99P1  
ctg4420□ctg5673□ctg6851□WAG-15J17  
ctg4420□ctg5673□ctg6851□WAG-17J19  
ctg4421□□□WAG-7O6  
ctg4421□□□WAG-81O12  
ctg4421□ctg1544□ctg1519□WAG-9E11  
ctg4421□ctg1544□ctg1519□WAG-43J9  
ctg4421□ctg1544□ctg1519□WAG-72J12  
ctg4421□ctg1544□ctg1519□WAG-89I10  
ctg4421□ctg1544□ctg1519□WAG-98A9  
ctg4421□ctg1544□ctg1519□WAG-103N23  
ctg4421□ctg1544□ctg1519□WAG-114H7  
ctg4421□ctg1544□ctg6615□WAG-53F3  
ctg4421□ctg1544□ctg6615□WAG-102J12  
ctg4422□ctg2188□ctg2059□WAG-18P22  
ctg4422□ctg2188□ctg2059□WAG-31H3  
ctg4422□ctg2188□ctg2059□WAG-35M14  
ctg4422□ctg2188□ctg2059□WAG-124D2  
ctg4422□ctg5097□ctg5681□WAG-66H8  
ctg4422□ctg5097□ctg5681□WAG-75H13  
ctg4423□□□WAG-2M1  
ctg4423□□□WAG-77N12  
ctg4423□□□WAG-94B10  
ctg4423□□□WAG-106H1  
ctg4423□ctg1267□ctg1402□WAG-16G12  
ctg4423□ctg1267□ctg1402□WAG-49H14  
ctg4423□ctg1267□ctg1402□WAG-64M3  
ctg4423□ctg1267□ctg1402□WAG-90F16  
ctg4423□ctg1267□ctg1402□WAG-118E1  
ctg4423□ctg1267□ctg4936□WAG-7B3  
ctg4423□ctg1267□ctg4936□WAG-38D15  
ctg4423□ctg876□ctg1010□WAG-18L3  
ctg4423□ctg876□ctg1010□WAG-41K20  
ctg4423□ctg876□ctg1010□WAG-54P8  
ctg4423□ctg876□ctg1010□WAG-100G18  
ctg4423□ctg876□ctg1010□WAG-104I18  
ctg4423□ctg876□ctg1010□WAG-125I5  
ctg4423□ctg876□ctg1010□WAG-130D9  
ctg4424□ctg1494□ctg1700□WAG-9H10  
ctg4424□ctg1494□ctg1700□WAG-25D19  
ctg4424□ctg1494□ctg1700□WAG-82J10  
ctg4424□ctg1494□ctg1700□WAG-116A19  
ctg4424□ctg1494□ctg4335□WAG-36I6  
ctg4424□ctg1494□ctg4335□WAG-64M12  
ctg4424□ctg1494□ctg4335□WAG-82O5  
ctg4425□□□WAG-125L9  
ctg4425□ctg1490□□WAG-104F17  
ctg4425□ctg1490□□WAG-109G3  
ctg4425□ctg1490□□WAG-116K10  
ctg4425□ctg1490□ctg2198□WAG-31L15  
ctg4425□ctg1490□ctg2198□WAG-51K13  
ctg4425□ctg1490□ctg2198□WAG-80P7  
ctg4425□ctg1490□ctg2198□WAG-83O9

ctg4425□ctg1490□ctg2198□WAG-100K24  
ctg4425□ctg1490□ctg2198□WAG-127P2  
ctg4426□ctg1899□□WAG-6B12  
ctg4426□ctg1899□□WAG-10G13  
ctg4426□ctg1899□□WAG-12D20  
ctg4426□ctg1899□ctg1734□WAG-24A17  
ctg4426□ctg1899□ctg1734□WAG-51E24  
ctg4426□ctg1899□ctg1734□WAG-57E13  
ctg4426□ctg1899□ctg1734□WAG-107H6  
ctg4426□ctg1899□ctg1734□WAG-118F20  
ctg4426□ctg1899□ctg1734□WAG-127F4  
ctg4426□ctg1899□ctg1734□WAG-129P14  
ctg4426□ctg456□ctg363□WAG-18N8  
ctg4426□ctg456□ctg363□WAG-36J18  
ctg4426□ctg456□ctg363□WAG-38I14  
ctg4426□ctg456□ctg363□WAG-44B8  
ctg4426□ctg456□ctg363□WAG-57E11  
ctg4426□ctg456□ctg363□WAG-78N20  
ctg4426□ctg456□ctg363□WAG-128N17  
ctg4426□ctg456□ctg4840□WAG-19C6  
ctg4426□ctg456□ctg4840□WAG-68L19  
ctg4427□□□WAG-10C4  
ctg4427□ctg1480□□WAG-31A2  
ctg4427□ctg1480□□WAG-59D16  
ctg4427□ctg1480□□WAG-89A3  
ctg4427□ctg1480□ctg2265□WAG-12D22  
ctg4427□ctg1480□ctg2265□WAG-18D14  
ctg4427□ctg1480□ctg2265□WAG-52O12  
ctg4427□ctg1480□ctg2265□WAG-85M8  
ctg4427□ctg1480□ctg2265□WAG-98J3  
ctg4427□ctg1480□ctg2265□WAG-100N15  
ctg4427□ctg1480□ctg2265□WAG-130P18  
ctg4427□ctg2122□ctg1991□WAG-11F17  
ctg4427□ctg2122□ctg1991□WAG-42L3  
ctg4427□ctg2122□ctg1991□WAG-112N20  
ctg4427□ctg2122□ctg1991□WAG-120H19  
ctg4428□ctg1473□ctg1530□WAG-15N19  
ctg4428□ctg1473□ctg1530□WAG-25F5  
ctg4428□ctg1473□ctg1530□WAG-26D23  
ctg4428□ctg1473□ctg1530□WAG-26M9  
ctg4428□ctg1473□ctg1530□WAG-27H11  
ctg4428□ctg1473□ctg1530□WAG-65G1  
ctg4428□ctg1473□ctg1530□WAG-70B22  
ctg4428□ctg1473□ctg1530□WAG-73A18  
ctg4428□ctg1473□ctg1530□WAG-90B13  
ctg4428□ctg1473□ctg1530□WAG-90L19  
ctg4429□□□WAG-1E9  
ctg4429□□□WAG-62D22  
ctg4429□ctg1129□□WAG-52A2  
ctg4429□ctg1129□ctg1259□WAG-17G4  
ctg4429□ctg1129□ctg1259□WAG-50G18  
ctg4429□ctg1129□ctg1259□WAG-68K24  
ctg4429□ctg1129□ctg1259□WAG-77E8  
ctg4429□ctg1129□ctg1259□WAG-84O11  
ctg4429□ctg1129□ctg1259□WAG-121B19  
ctg4429□ctg1129□ctg1698□WAG-49B19



ctg4429□ctg1129□ctg1698□WAG-59I5  
ctg4429□ctg1129□ctg1698□WAG-63J2  
ctg4429□ctg1129□ctg1698□WAG-88C15  
ctg443□□□WAG-4I15  
ctg443□□□WAG-39I11  
ctg443□□□WAG-97M22  
ctg443□ctg1368□□WAG-39C12  
ctg443□ctg1368□ctg1208□WAG-32K11  
ctg443□ctg1368□ctg1208□WAG-44E15  
ctg443□ctg1368□ctg1208□WAG-55K6  
ctg443□ctg1368□ctg1208□WAG-65F10  
ctg443□ctg1368□ctg1208□WAG-107D5  
ctg443□ctg1368□ctg1208□WAG-118A24  
ctg443□ctg2459□ctg2851□WAG-70P15  
ctg443□ctg2459□ctg2851□WAG-91B10  
ctg443□ctg2459□ctg2851□WAG-106N5  
ctg443□ctg2459□ctg2851□WAG-118E14  
ctg4430□ctg1357□□WAG-10J14  
ctg4430□ctg1357□ctg2126□WAG-14K6  
ctg4430□ctg1357□ctg2126□WAG-69I11  
ctg4430□ctg1357□ctg2126□WAG-81F7  
ctg4430□ctg1357□ctg2126□WAG-111O6  
ctg4430□ctg1357□ctg2126□WAG-116G1  
ctg4430□ctg1357□ctg5298□WAG-60L7  
ctg4430□ctg1357□ctg5298□WAG-104P5  
ctg4431□□□WAG-7I2  
ctg4431□ctg1280□□WAG-55B6  
ctg4431□ctg1280□□WAG-75F18  
ctg4431□ctg1280□ctg1128□WAG-4A9  
ctg4431□ctg1280□ctg1128□WAG-6M23  
ctg4431□ctg1280□ctg1128□WAG-86F10  
ctg4431□ctg1280□ctg1128□WAG-87A22  
ctg4431□ctg1280□ctg1128□WAG-91F12  
ctg4431□ctg1280□ctg1128□WAG-95P11  
ctg4431□ctg1280□ctg1128□WAG-107I2  
ctg4431□ctg1280□ctg1128□WAG-116E12  
ctg4431□ctg1280□ctg1128□WAG-119B16  
ctg4431□ctg1280□ctg2002□WAG-42H5  
ctg4431□ctg1280□ctg2002□WAG-76K16  
ctg4431□ctg1280□ctg2002□WAG-85M4  
ctg4431□ctg1280□ctg2002□WAG-92M24  
ctg4431□ctg1280□ctg2002□WAG-108B18  
ctg4431□ctg1280□ctg2002□WAG-122I7  
ctg4431□ctg1280□ctg2002□WAG-126P5  
ctg4431□ctg1280□ctg2002□WAG-127K12  
ctg4432□ctg1044□□WAG-106E18  
ctg4432□ctg1044□ctg875□WAG-12P8  
ctg4432□ctg1044□ctg875□WAG-17P2  
ctg4432□ctg1044□ctg875□WAG-44A18  
ctg4432□ctg1044□ctg875□WAG-57H10  
ctg4432□ctg1044□ctg875□WAG-70K2  
ctg4432□ctg1044□ctg875□WAG-81D6  
ctg4433□□□WAG-117K19  
ctg4433□ctg1038□□WAG-120A23  
ctg4433□ctg1038□ctg1574□WAG-90B19  
ctg4433□ctg1038□ctg1574□WAG-119N11

ctg4433□ctg1038□ctg1574□WAG-130F23  
ctg4433□ctg1038□ctg869□WAG-20O13  
ctg4433□ctg1038□ctg869□WAG-38D24  
ctg4433□ctg1038□ctg869□WAG-43L9  
ctg4433□ctg1038□ctg869□WAG-50D16  
ctg4433□ctg1038□ctg869□WAG-79B19  
ctg4433□ctg1038□ctg869□WAG-93I6  
ctg4434□ctg848□□WAG-13E8  
ctg4434□ctg848□□WAG-59A19  
ctg4434□ctg848□□WAG-76B22  
ctg4434□ctg848□ctg1193□WAG-8D3  
ctg4434□ctg848□ctg1193□WAG-12B12  
ctg4434□ctg848□ctg1193□WAG-62G5  
ctg4434□ctg848□ctg1193□WAG-115O14  
ctg4434□ctg964□ctg1203□WAG-12N19  
ctg4434□ctg964□ctg1203□WAG-14I22  
ctg4434□ctg964□ctg1203□WAG-25O12  
ctg4434□ctg964□ctg1203□WAG-32A1  
ctg4434□ctg964□ctg1203□WAG-32H7  
ctg4434□ctg964□ctg1203□WAG-95M20  
ctg4435□ctg1157□ctg991□WAG-4L7  
ctg4435□ctg1157□ctg991□WAG-21B15  
ctg4435□ctg1157□ctg991□WAG-31F17  
ctg4435□ctg1157□ctg991□WAG-40B24  
ctg4435□ctg1157□ctg991□WAG-72B18  
ctg4435□ctg1157□ctg991□WAG-83B2  
ctg4435□ctg1157□ctg991□WAG-102G15  
ctg4436□ctg1142□□WAG-27L16  
ctg4436□ctg1142□ctg1271□WAG-28P5  
ctg4436□ctg1142□ctg1271□WAG-32G7  
ctg4436□ctg1142□ctg1271□WAG-37G8  
ctg4436□ctg1142□ctg1271□WAG-40D9  
ctg4436□ctg1142□ctg1271□WAG-42N16  
ctg4436□ctg1142□ctg1271□WAG-64H22  
ctg4437□□□WAG-97O23  
ctg4437□ctg900□□WAG-11B8  
ctg4437□ctg900□ctg985□WAG-7D7  
ctg4437□ctg900□ctg985□WAG-8H16  
ctg4437□ctg900□ctg985□WAG-85K4  
ctg4437□ctg900□ctg985□WAG-86O4  
ctg4437□ctg900□ctg985□WAG-91D15  
ctg4437□ctg900□ctg985□WAG-101F24  
ctg4437□ctg900□ctg985□WAG-111C1  
ctg4437□ctg900□ctg985□WAG-117L15  
ctg4438□ctg1269□□WAG-57M24  
ctg4438□ctg1269□ctg1418□WAG-31K12  
ctg4438□ctg1269□ctg1418□WAG-39H17  
ctg4438□ctg1269□ctg1418□WAG-48H11  
ctg4438□ctg1269□ctg1418□WAG-73A20  
ctg4438□ctg1269□ctg1418□WAG-93B2  
ctg4438□ctg1269□ctg1418□WAG-93H21  
ctg4438□ctg1269□ctg1418□WAG-125D6  
ctg4439□□□WAG-23J2  
ctg4439□□□WAG-102H9  
ctg4439□□□WAG-126A4  
ctg4439□ctg1189□□WAG-111L5

ctg4439□ctg1189□ctg1376□WAG-13H1  
ctg4439□ctg1189□ctg1376□WAG-15D17  
ctg4439□ctg1189□ctg1376□WAG-39L18  
ctg4439□ctg1189□ctg1376□WAG-58M22  
ctg4439□ctg1189□ctg1376□WAG-72K7  
ctg4439□ctg1189□ctg1376□WAG-98A14  
ctg4439□ctg1189□ctg1376□WAG-112A24  
ctg4439□ctg1189□ctg1376□WAG-123J3  
ctg4439□ctg1756□□WAG-56H10  
ctg4439□ctg1756□ctg1594□WAG-57P23  
ctg4439□ctg1756□ctg1594□WAG-94G9  
ctg4439□ctg1756□ctg1594□WAG-103M11  
ctg4439□ctg1756□ctg1594□WAG-126E20  
ctg4439□ctg1756□ctg4487□WAG-98D18  
ctg4439□ctg1756□ctg4487□WAG-105L19  
ctg4439□ctg1756□ctg4817□WAG-46P14  
ctg4439□ctg1756□ctg4817□WAG-111N9  
ctg4439□ctg1756□ctg5646□WAG-50F19  
ctg4439□ctg1756□ctg5646□WAG-117P12  
ctg4439□ctg994□□WAG-2B6  
ctg4439□ctg994□□WAG-11D24  
ctg4439□ctg994□□WAG-36K17  
ctg4439□ctg994□ctg1151□WAG-2E9  
ctg4439□ctg994□ctg1151□WAG-19M18  
ctg4439□ctg994□ctg1151□WAG-33A16  
ctg4439□ctg994□ctg1151□WAG-41E11  
ctg4439□ctg994□ctg1151□WAG-48I13  
ctg4439□ctg994□ctg1151□WAG-54N8  
ctg4439□ctg994□ctg1151□WAG-68I1  
ctg4439□ctg994□ctg1151□WAG-73N8  
ctg4439□ctg994□ctg1151□WAG-76A7  
ctg4439□ctg994□ctg1151□WAG-109L8  
ctg4439□ctg994□ctg1151□WAG-110C22  
ctg444□ctg1033□ctg866□WAG-17K11  
ctg444□ctg1033□ctg866□WAG-22I3  
ctg444□ctg1033□ctg866□WAG-24C12  
ctg444□ctg1033□ctg866□WAG-52B5  
ctg444□ctg1033□ctg866□WAG-129M14  
ctg4440□□□WAG-25K16  
ctg4440□ctg845□□WAG-11F8  
ctg4440□ctg845□ctg1236□WAG-4D3  
ctg4440□ctg845□ctg1236□WAG-9I11  
ctg4440□ctg845□ctg1236□WAG-62M22  
ctg4440□ctg845□ctg1236□WAG-75C20  
ctg4440□ctg845□ctg1236□WAG-92C11  
ctg4440□ctg845□ctg1236□WAG-118N18  
ctg4440□ctg845□ctg6106□WAG-8C14  
ctg4440□ctg845□ctg6106□WAG-76I4  
ctg4441□□□WAG-88N17  
ctg4441□ctg3121□□WAG-94B3  
ctg4441□ctg3121□□WAG-117E5  
ctg4441□ctg3121□ctg3782□WAG-61P7  
ctg4441□ctg3121□ctg3782□WAG-77L17  
ctg4441□ctg3121□ctg3782□WAG-93K8  
ctg4441□ctg3121□ctg3782□WAG-119G22  
ctg4441□ctg983□ctg1076□WAG-9F21

ctg4441□ctg983□ctg1076□WAG-9H2  
ctg4441□ctg983□ctg1076□WAG-35B4  
ctg4441□ctg983□ctg1076□WAG-60B14  
ctg4441□ctg983□ctg1076□WAG-95B1  
ctg4441□ctg983□ctg1076□WAG-99N5  
ctg4441□ctg983□ctg1076□WAG-108K20  
ctg4441□ctg983□ctg1076□WAG-110O24  
ctg4442□ctg892□ctg6545□WAG-66P14  
ctg4442□ctg892□ctg6545□WAG-89L6  
ctg4442□ctg892□ctg796□WAG-45H12  
ctg4442□ctg892□ctg796□WAG-46E20  
ctg4442□ctg892□ctg796□WAG-48M16  
ctg4442□ctg892□ctg796□WAG-58K4  
ctg4442□ctg892□ctg796□WAG-62O21  
ctg4442□ctg892□ctg796□WAG-72B10  
ctg4442□ctg892□ctg796□WAG-99O22  
ctg4442□ctg892□ctg796□WAG-102O24  
ctg4442□ctg892□ctg796□WAG-115C5  
ctg4442□ctg892□ctg796□WAG-118E12  
ctg4442□ctg892□ctg796□WAG-118F10  
ctg4442□ctg892□ctg796□WAG-129F5  
ctg4443□□□WAG-15F2  
ctg4443□□□WAG-20J18  
ctg4443□□□WAG-36D22  
ctg4443□□□WAG-81D17  
ctg4443□ctg1281□□WAG-11K13  
ctg4443□ctg1281□□WAG-17B14  
ctg4443□ctg1281□□WAG-112F3  
ctg4443□ctg1281□□WAG-113D6  
ctg4443□ctg1281□ctg1130□WAG-78D2  
ctg4443□ctg1281□ctg1130□WAG-104B24  
ctg4443□ctg1281□ctg1130□WAG-115N14  
ctg4443□ctg1281□ctg1130□WAG-116K16  
ctg4443□ctg1281□ctg2159□WAG-24A6  
ctg4443□ctg1281□ctg2159□WAG-66I24  
ctg4443□ctg1281□ctg2159□WAG-80A13  
ctg4443□ctg1281□ctg2159□WAG-111D3  
ctg4443□ctg1281□ctg4732□WAG-64E21  
ctg4443□ctg1281□ctg4732□WAG-130J4  
ctg4443□ctg1281□ctg6627□WAG-83O14  
ctg4443□ctg1281□ctg6627□WAG-97L21  
ctg4444□□□WAG-26M7  
ctg4444□ctg5291□ctg6127□WAG-36P8  
ctg4444□ctg5291□ctg6127□WAG-95B18  
ctg4444□ctg778□□WAG-19M15  
ctg4444□ctg778□□WAG-105E6  
ctg4444□ctg778□ctg821□WAG-25C6  
ctg4444□ctg778□ctg821□WAG-74L23  
ctg4444□ctg778□ctg821□WAG-80O4  
ctg4444□ctg778□ctg821□WAG-83J24  
ctg4444□ctg778□ctg821□WAG-99L15  
ctg4444□ctg778□ctg821□WAG-108I16  
ctg4444□ctg778□ctg821□WAG-124I3  
ctg4445□ctg2103□□WAG-32J11  
ctg4445□ctg2103□ctg2678□WAG-66N15  
ctg4445□ctg2103□ctg2678□WAG-108A5

ctg4445□ctg2103□ctg2678□WAG-119J24  
ctg4445□ctg909□ctg6020□WAG-1L12  
ctg4445□ctg909□ctg6020□WAG-71L13  
ctg4445□ctg909□ctg953□WAG-28P21  
ctg4445□ctg909□ctg953□WAG-65C9  
ctg4445□ctg909□ctg953□WAG-65E5  
ctg4445□ctg909□ctg953□WAG-99C23  
ctg4445□ctg909□ctg953□WAG-114F15  
ctg4445□ctg909□ctg953□WAG-117P10  
ctg4446□□□WAG-127G24  
ctg4446□ctg727□ctg1593□WAG-11A9  
ctg4446□ctg727□ctg1593□WAG-13I5  
ctg4446□ctg727□ctg1593□WAG-20C6  
ctg4446□ctg727□ctg1593□WAG-24E12  
ctg4446□ctg727□ctg1593□WAG-51F14  
ctg4446□ctg727□ctg1593□WAG-60N16  
ctg4446□ctg727□ctg1593□WAG-66G2  
ctg4446□ctg727□ctg1593□WAG-66H12  
ctg4446□ctg727□ctg1593□WAG-74M21  
ctg4446□ctg727□ctg1593□WAG-84F10  
ctg4446□ctg727□ctg1593□WAG-89J15  
ctg4446□ctg727□ctg1593□WAG-121C16  
ctg4446□ctg727□ctg4096□WAG-97K11  
ctg4446□ctg727□ctg4096□WAG-99F23  
ctg4446□ctg727□ctg4096□WAG-121O10  
ctg4446□ctg727□ctg4504□WAG-89J4  
ctg4446□ctg727□ctg4504□WAG-121P2  
ctg4446□ctg727□ctg6041□WAG-21B17  
ctg4446□ctg727□ctg6041□WAG-123A4  
ctg4446□ctg727□ctg6299□WAG-73L22  
ctg4446□ctg727□ctg6299□WAG-122D21  
ctg4446□ctg727□ctg6636□WAG-69K17  
ctg4446□ctg727□ctg6636□WAG-77C21  
ctg4447□ctg710□□□WAG-120P8  
ctg4447□ctg710□ctg726□WAG-5D5  
ctg4447□ctg710□ctg726□WAG-15C12  
ctg4447□ctg710□ctg726□WAG-74N3  
ctg4447□ctg710□ctg726□WAG-75G2  
ctg4447□ctg710□ctg726□WAG-84P18  
ctg4448□ctg811□□□WAG-120H18  
ctg4448□ctg811□ctg886□WAG-2J19  
ctg4448□ctg811□ctg886□WAG-7B18  
ctg4448□ctg811□ctg886□WAG-26G10  
ctg4448□ctg811□ctg886□WAG-28B11  
ctg4448□ctg811□ctg886□WAG-52P7  
ctg4448□ctg811□ctg886□WAG-97F21  
ctg4448□ctg811□ctg886□WAG-99H3  
ctg4448□ctg811□ctg886□WAG-109G22  
ctg4449□ctg638□ctg521□WAG-31O3  
ctg4449□ctg638□ctg521□WAG-55E4  
ctg4449□ctg638□ctg521□WAG-70O15  
ctg4449□ctg638□ctg521□WAG-87O5  
ctg4449□ctg638□ctg521□WAG-88D9  
ctg4449□ctg638□ctg521□WAG-120G16  
ctg445□□□WAG-23J24  
ctg445□ctg1253□□□WAG-98G2

ctg445□ctg1253□ctg1851□WAG-18B22  
ctg445□ctg1253□ctg1851□WAG-89C23  
ctg445□ctg1253□ctg1851□WAG-121C10  
ctg445□ctg1253□ctg1851□WAG-128G11  
ctg445□ctg1253□ctg6647□WAG-9C12  
ctg445□ctg1253□ctg6647□WAG-54J9  
ctg4450□ctg568□□WAG-54N19  
ctg4450□ctg568□ctg621□WAG-1K5  
ctg4450□ctg568□ctg621□WAG-44E5  
ctg4450□ctg568□ctg621□WAG-82H15  
ctg4450□ctg568□ctg621□WAG-90E2  
ctg4450□ctg568□ctg621□WAG-90P21  
ctg4450□ctg568□ctg621□WAG-130I15  
ctg4451□□□WAG-89D1  
ctg4451□ctg526□ctg429□WAG-52O23  
ctg4451□ctg526□ctg429□WAG-53M9  
ctg4451□ctg526□ctg429□WAG-57O12  
ctg4451□ctg526□ctg429□WAG-60F7  
ctg4451□ctg526□ctg429□WAG-80B1  
ctg4451□ctg526□ctg429□WAG-91N10  
ctg4451□ctg526□ctg429□WAG-115A3  
ctg4451□ctg526□ctg429□WAG-126O11  
ctg4451□ctg526□ctg429□WAG-128L13  
ctg4452□ctg650□ctg601□WAG-7C11  
ctg4452□ctg650□ctg601□WAG-15H12  
ctg4452□ctg650□ctg601□WAG-22D14  
ctg4452□ctg650□ctg601□WAG-30F22  
ctg4452□ctg650□ctg601□WAG-32K12  
ctg4452□ctg650□ctg601□WAG-39F6  
ctg4452□ctg650□ctg601□WAG-42I14  
ctg4452□ctg650□ctg601□WAG-48B3  
ctg4452□ctg650□ctg601□WAG-59I11  
ctg4452□ctg650□ctg601□WAG-63E19  
ctg4452□ctg650□ctg601□WAG-79E16  
ctg4452□ctg650□ctg601□WAG-92E19  
ctg4452□ctg650□ctg601□WAG-100O7  
ctg4452□ctg650□ctg601□WAG-108J23  
ctg4453□ctg596□□WAG-99F3  
ctg4453□ctg596□ctg488□WAG-20H6  
ctg4453□ctg596□ctg488□WAG-29D17  
ctg4453□ctg596□ctg488□WAG-88M10  
ctg4453□ctg596□ctg488□WAG-99G12  
ctg4453□ctg596□ctg488□WAG-100F17  
ctg4453□ctg596□ctg488□WAG-119B20  
ctg4453□ctg596□ctg488□WAG-129I14  
ctg4454□□□WAG-79O22  
ctg4454□ctg2281□□WAG-7D22  
ctg4454□ctg2281□□WAG-71D4  
ctg4454□ctg2281□□WAG-76G12  
ctg4454□ctg2281□□WAG-105N11  
ctg4454□ctg2281□ctg2185□WAG-76J3  
ctg4454□ctg2281□ctg2185□WAG-91I11  
ctg4454□ctg2281□ctg2185□WAG-119E10  
ctg4454□ctg2281□ctg2185□WAG-123J21  
ctg4454□ctg2281□ctg5256□WAG-25H6  
ctg4454□ctg2281□ctg5256□WAG-43M4

ctg4454□ctg728□□WAG-35C6  
ctg4454□ctg728□□WAG-89M24  
ctg4454□ctg728□□WAG-126H10  
ctg4454□ctg728□ctg3273□WAG-35J21  
ctg4454□ctg728□ctg3273□WAG-105D18  
ctg4454□ctg728□ctg3273□WAG-130G2  
ctg4454□ctg728□ctg585□WAG-25G19  
ctg4454□ctg728□ctg585□WAG-38D10  
ctg4454□ctg728□ctg585□WAG-42H8  
ctg4454□ctg728□ctg585□WAG-53B9  
ctg4454□ctg728□ctg585□WAG-54L4  
ctg4454□ctg728□ctg585□WAG-61B5  
ctg4454□ctg728□ctg585□WAG-64J24  
ctg4454□ctg728□ctg585□WAG-64K19  
ctg4454□ctg728□ctg585□WAG-99J14  
ctg4454□ctg728□ctg585□WAG-121A8  
ctg4454□ctg728□ctg585□WAG-127K21  
ctg4455□ctg431□□WAG-19L8  
ctg4455□ctg431□□WAG-110I5  
ctg4455□ctg431□ctg420□WAG-62G1  
ctg4455□ctg431□ctg420□WAG-81L18  
ctg4455□ctg431□ctg420□WAG-89G23  
ctg4455□ctg431□ctg420□WAG-93L1  
ctg4455□ctg431□ctg420□WAG-98F17  
ctg4455□ctg431□ctg420□WAG-108D3  
ctg4455□ctg431□ctg420□WAG-114A20  
ctg4455□ctg431□ctg6430□WAG-16J22  
ctg4455□ctg431□ctg6430□WAG-91E6  
ctg4455□ctg431□ctg6722□WAG-6L20  
ctg4455□ctg431□ctg6722□WAG-130I11  
ctg4456□□□WAG-21M15  
ctg4456□□□WAG-31B18  
ctg4456□□□WAG-31K11  
ctg4456□ctg102□□WAG-34L21  
ctg4456□ctg102□□WAG-53C22  
ctg4456□ctg102□ctg117□WAG-3F21  
ctg4456□ctg102□ctg117□WAG-9K16  
ctg4456□ctg102□ctg117□WAG-14D8  
ctg4456□ctg102□ctg117□WAG-24F24  
ctg4456□ctg102□ctg117□WAG-26O21  
ctg4456□ctg102□ctg117□WAG-45K8  
ctg4456□ctg102□ctg117□WAG-45O16  
ctg4456□ctg102□ctg117□WAG-48D18  
ctg4456□ctg102□ctg117□WAG-57L16  
ctg4456□ctg102□ctg117□WAG-60N20  
ctg4456□ctg102□ctg117□WAG-69D5  
ctg4456□ctg102□ctg117□WAG-76K4  
ctg4456□ctg102□ctg117□WAG-82F23  
ctg4456□ctg102□ctg117□WAG-84B24  
ctg4456□ctg102□ctg117□WAG-92E5  
ctg4456□ctg102□ctg117□WAG-103F3  
ctg4456□ctg102□ctg117□WAG-112K2  
ctg4456□ctg102□ctg117□WAG-114P16  
ctg4456□ctg102□ctg117□WAG-118F3  
ctg4456□ctg102□ctg117□WAG-120D24  
ctg4456□ctg102□ctg117□WAG-129I23

ctg4456□ctg102□ctg117□WAG-130D19  
ctg4456□ctg102□ctg732□WAG-15A15  
ctg4456□ctg102□ctg732□WAG-41G2  
ctg4456□ctg102□ctg732□WAG-78M6  
ctg4456□ctg102□ctg732□WAG-80K14  
ctg4456□ctg102□ctg732□WAG-88N13  
ctg4456□ctg102□ctg732□WAG-98P22  
ctg4456□ctg102□ctg872□WAG-9G13  
ctg4456□ctg102□ctg872□WAG-23O15  
ctg4456□ctg102□ctg872□WAG-42B16  
ctg4456□ctg102□ctg872□WAG-56G5  
ctg4456□ctg102□ctg872□WAG-103N15  
ctg4456□ctg102□ctg872□WAG-121M14  
ctg4456□ctg3351□□WAG-37K22  
ctg4456□ctg3351□□WAG-38C14  
ctg4456□ctg3351□□WAG-101O5  
ctg4456□ctg3351□ctg6004□WAG-83E15  
ctg4456□ctg3351□ctg6004□WAG-103K10  
ctg4457□□□WAG-53A2  
ctg4457□ctg360□□WAG-38F12  
ctg4457□ctg360□□WAG-116P16  
ctg4457□ctg360□ctg568□WAG-11H20  
ctg4457□ctg360□ctg568□WAG-15C13  
ctg4457□ctg360□ctg568□WAG-32K7  
ctg4457□ctg360□ctg568□WAG-76B17  
ctg4457□ctg360□ctg568□WAG-88I21  
ctg4457□ctg360□ctg568□WAG-95P21  
ctg4457□ctg360□ctg568□WAG-100H22  
ctg4457□ctg360□ctg568□WAG-104D10  
ctg4457□ctg360□ctg568□WAG-111O23  
ctg4457□ctg360□ctg568□WAG-121N15  
ctg4457□ctg360□ctg568□WAG-124J16  
ctg4457□ctg360□ctg6926□WAG-70J10  
ctg4457□ctg360□ctg6926□WAG-94B15  
ctg4458□□□WAG-20E20  
ctg4458□□□WAG-51B20  
ctg4458□□□WAG-93D24  
ctg4458□ctg333□□WAG-14J23  
ctg4458□ctg333□□WAG-39I17  
ctg4458□ctg333□□WAG-101J19  
ctg4458□ctg333□□WAG-109O23  
ctg4458□ctg333□ctg332□WAG-25A10  
ctg4458□ctg333□ctg332□WAG-25E24  
ctg4458□ctg333□ctg332□WAG-34E12  
ctg4458□ctg333□ctg332□WAG-54N17  
ctg4458□ctg333□ctg332□WAG-59E20  
ctg4458□ctg333□ctg332□WAG-65B10  
ctg4458□ctg333□ctg332□WAG-66B16  
ctg4458□ctg333□ctg332□WAG-71C22  
ctg4458□ctg333□ctg332□WAG-72O20  
ctg4458□ctg333□ctg332□WAG-75J12  
ctg4458□ctg333□ctg332□WAG-79C14  
ctg4458□ctg333□ctg332□WAG-86I4  
ctg4458□ctg333□ctg332□WAG-88H23  
ctg4458□ctg333□ctg332□WAG-95A18  
ctg4458□ctg333□ctg332□WAG-95K8



ctg4458□ctg333□ctg332□WAG-100M18  
ctg4458□ctg333□ctg332□WAG-120K22  
ctg4458□ctg333□ctg4626□WAG-124C5  
ctg4458□ctg333□ctg4626□WAG-129M23  
ctg4458□ctg333□ctg983□WAG-17C11  
ctg4458□ctg333□ctg983□WAG-21A10  
ctg4458□ctg333□ctg983□WAG-42B14  
ctg4458□ctg333□ctg983□WAG-49K11  
ctg4458□ctg333□ctg983□WAG-62A18  
ctg4458□ctg333□ctg983□WAG-67A7  
ctg4458□ctg333□ctg983□WAG-68C8  
ctg4458□ctg333□ctg983□WAG-80A15  
ctg4458□ctg333□ctg983□WAG-81F5  
ctg4458□ctg6609□□WAG-87D4  
ctg4458□ctg6609□ctg3008□WAG-O12  
ctg4458□ctg6609□ctg3008□WAG-12E1  
ctg4458□ctg6609□ctg3008□WAG-121O19  
ctg4459□□□WAG-80J16  
ctg4459□ctg1242□□WAG-56D7  
ctg4459□ctg1242□ctg1234□WAG-11P10  
ctg4459□ctg1242□ctg1234□WAG-26K10  
ctg4459□ctg1242□ctg1234□WAG-71N6  
ctg4459□ctg1242□ctg1234□WAG-73D5  
ctg4459□ctg1242□ctg1234□WAG-78I5  
ctg4459□ctg1242□ctg1234□WAG-114O16  
ctg4459□ctg258□ctg200□WAG-10E7  
ctg4459□ctg258□ctg200□WAG-19F14  
ctg4459□ctg258□ctg200□WAG-21P4  
ctg4459□ctg258□ctg200□WAG-35E12  
ctg4459□ctg258□ctg200□WAG-63L17  
ctg4459□ctg258□ctg200□WAG-78I20  
ctg4459□ctg258□ctg200□WAG-109N20  
ctg4459□ctg258□ctg200□WAG-124E6  
ctg4459□ctg258□ctg200□WAG-127C4  
ctg446□ctg1216□ctg1409□WAG-3C20  
ctg446□ctg1216□ctg1409□WAG-17L12  
ctg446□ctg1216□ctg1409□WAG-20G9  
ctg446□ctg1216□ctg1409□WAG-46C9  
ctg446□ctg1216□ctg4657□WAG-7O8  
ctg446□ctg1216□ctg4657□WAG-25K6  
ctg4460□□□WAG-1J8  
ctg4460□□□WAG-122F16  
ctg4460□ctg226□□WAG-125F5  
ctg4460□ctg226□ctg282□WAG-54M17  
ctg4460□ctg226□ctg282□WAG-56M2  
ctg4460□ctg226□ctg282□WAG-88K13  
ctg4460□ctg226□ctg282□WAG-89L23  
ctg4460□ctg226□ctg282□WAG-101K5  
ctg4460□ctg226□ctg282□WAG-124B13  
ctg4460□ctg226□ctg282□WAG-127F16  
ctg4460□ctg226□ctg282□WAG-128O24  
ctg4460□ctg785□□WAG-52B11  
ctg4460□ctg785□ctg4631□WAG-90F23  
ctg4460□ctg785□ctg4631□WAG-90H16  
ctg4460□ctg785□ctg789□WAG-8B10  
ctg4460□ctg785□ctg789□WAG-18L2

ctg4460□ctg785□ctg789□WAG-47D17  
ctg4460□ctg785□ctg789□WAG-57C4  
ctg4460□ctg785□ctg789□WAG-70M11  
ctg4460□ctg785□ctg789□WAG-90N14  
ctg4461□□□WAG-17M19  
ctg4461□□□WAG-18I13  
ctg4461□ctg284□□WAG-5A8  
ctg4461□ctg284□□WAG-37O3  
ctg4461□ctg284□□WAG-85D5  
ctg4461□ctg284□ctg219□WAG-10N7  
ctg4461□ctg284□ctg219□WAG-12N11  
ctg4461□ctg284□ctg219□WAG-22M11  
ctg4461□ctg284□ctg219□WAG-26F6  
ctg4461□ctg284□ctg219□WAG-35B5  
ctg4461□ctg284□ctg219□WAG-51I19  
ctg4461□ctg284□ctg219□WAG-58A14  
ctg4461□ctg284□ctg219□WAG-65P5  
ctg4461□ctg284□ctg219□WAG-96L16  
ctg4461□ctg284□ctg219□WAG-101H20  
ctg4461□ctg284□ctg219□WAG-102M11  
ctg4461□ctg284□ctg219□WAG-107G7  
ctg4461□ctg284□ctg219□WAG-113K17  
ctg4461□ctg284□ctg219□WAG-120F9  
ctg4461□ctg284□ctg219□WAG-121G17  
ctg4461□ctg284□ctg219□WAG-126P15  
ctg4461□ctg284□ctg219□WAG-128N2  
ctg4461□ctg284□ctg3085□WAG-35E9  
ctg4461□ctg284□ctg3085□WAG-45O21  
ctg4461□ctg284□ctg3085□WAG-115N16  
ctg4462□□□WAG-6F14  
ctg4462□ctg2802□ctg2796□WAG-25I6  
ctg4462□ctg2802□ctg2796□WAG-26P19  
ctg4462□ctg2802□ctg2796□WAG-34G17  
ctg4462□ctg2802□ctg2796□WAG-95N15  
ctg4462□ctg2802□ctg2796□WAG-99A9  
ctg4462□ctg2802□ctg2796□WAG-111L4  
ctg4462□ctg340□□WAG-25D23  
ctg4462□ctg340□□WAG-34J9  
ctg4462□ctg340□□WAG-128O4  
ctg4462□ctg340□ctg269□WAG-8O10  
ctg4462□ctg340□ctg269□WAG-13I2  
ctg4462□ctg340□ctg269□WAG-33O15  
ctg4462□ctg340□ctg269□WAG-55P11  
ctg4462□ctg340□ctg269□WAG-60J8  
ctg4462□ctg340□ctg269□WAG-63L18  
ctg4462□ctg340□ctg269□WAG-77O9  
ctg4462□ctg340□ctg269□WAG-83F19  
ctg4462□ctg340□ctg269□WAG-117O16  
ctg4462□ctg340□ctg269□WAG-126E5  
ctg4462□ctg340□ctg269□WAG-130F14  
ctg4462□ctg340□ctg339□WAG-4I16  
ctg4462□ctg340□ctg339□WAG-54L12  
ctg4462□ctg340□ctg339□WAG-78B2  
ctg4462□ctg340□ctg339□WAG-79M9  
ctg4462□ctg340□ctg339□WAG-97D23  
ctg4462□ctg340□ctg339□WAG-106M3

ctg4462□ctg340□ctg339□WAG-117N20  
ctg4462□ctg340□ctg339□WAG-124J3  
ctg4462□ctg340□ctg339□WAG-130N21  
ctg4462□ctg3983□ctg4255□WAG-31C10  
ctg4462□ctg3983□ctg4255□WAG-38B13  
ctg4462□ctg3983□ctg4255□WAG-50N20  
ctg4462□ctg5387□ctg6355□WAG-125K10  
ctg4462□ctg5387□ctg6355□WAG-126J8  
ctg4463□□□WAG-41L19  
ctg4463□ctg1078□□WAG-60C23  
ctg4463□ctg1078□ctg1789□WAG-15O14  
ctg4463□ctg1078□ctg1789□WAG-41L18  
ctg4463□ctg1078□ctg1789□WAG-126I20  
ctg4463□ctg1078□ctg923□WAG-12G13  
ctg4463□ctg1078□ctg923□WAG-14E12  
ctg4463□ctg1078□ctg923□WAG-19C5  
ctg4463□ctg1078□ctg923□WAG-26A16  
ctg4463□ctg1078□ctg923□WAG-26M8  
ctg4463□ctg1078□ctg923□WAG-38P14  
ctg4463□ctg1078□ctg923□WAG-48B23  
ctg4463□ctg1078□ctg923□WAG-79B18  
ctg4463□ctg1078□ctg923□WAG-82K10  
ctg4463□ctg1078□ctg923□WAG-84G21  
ctg4463□ctg1078□ctg923□WAG-120O7  
ctg4463□ctg1078□ctg923□WAG-123G22  
ctg4463□ctg1124□□WAG-8M24  
ctg4463□ctg1124□□WAG-27B12  
ctg4463□ctg1124□□WAG-64P22  
ctg4463□ctg1124□□WAG-86N2  
ctg4463□ctg1124□ctg2667□WAG-14M19  
ctg4463□ctg1124□ctg2667□WAG-15N24  
ctg4463□ctg1124□ctg2667□WAG-16C21  
ctg4463□ctg1124□ctg2667□WAG-63P3  
ctg4463□ctg1124□ctg2667□WAG-119J1  
ctg4463□ctg268□□WAG-69N18  
ctg4463□ctg268□□WAG-91G12  
ctg4463□ctg268□ctg210□WAG-40H12  
ctg4463□ctg268□ctg210□WAG-43H10  
ctg4463□ctg268□ctg210□WAG-43P24  
ctg4463□ctg268□ctg210□WAG-82F8  
ctg4463□ctg268□ctg210□WAG-106K6  
ctg4463□ctg268□ctg210□WAG-111A19  
ctg4463□ctg268□ctg210□WAG-117E21  
ctg4463□ctg268□ctg210□WAG-126G4  
ctg4463□ctg268□ctg210□WAG-128C11  
ctg4463□ctg2758□□WAG-96B8  
ctg4463□ctg2758□ctg2742□WAG-8P5  
ctg4463□ctg2758□ctg2742□WAG-33F11  
ctg4463□ctg2758□ctg2742□WAG-49D14  
ctg4463□ctg2758□ctg2742□WAG-55H19  
ctg4464□ctg2683□ctg2652□WAG-55N22  
ctg4464□ctg2683□ctg2652□WAG-82A8  
ctg4464□ctg2683□ctg2652□WAG-82B1  
ctg4464□ctg2683□ctg2652□WAG-90C10  
ctg4464□ctg745□ctg605□WAG-29B4  
ctg4464□ctg745□ctg605□WAG-36P1

ctg4464□ctg745□ctg605□WAG-53K11  
ctg4464□ctg745□ctg605□WAG-71D21  
ctg4464□ctg745□ctg605□WAG-73D8  
ctg4464□ctg745□ctg605□WAG-80E5  
ctg4464□ctg745□ctg605□WAG-108D7  
ctg4464□ctg745□ctg605□WAG-112F16  
ctg4464□ctg745□ctg605□WAG-121O2  
ctg4464□ctg745□ctg605□WAG-129A21  
ctg4465□□□WAG-52M13  
ctg4465□ctg2351□□WAG-66E15  
ctg4465□ctg2351□□WAG-96A4  
ctg4465□ctg2351□ctg3909□WAG-39H1  
ctg4465□ctg2351□ctg3909□WAG-119F20  
ctg4465□ctg2351□ctg5705□WAG-100B17  
ctg4465□ctg2351□ctg5705□WAG-115G13  
ctg4465□ctg5650□□WAG-29G8  
ctg4465□ctg5650□□WAG-33P7  
ctg4466□□□WAG-8P13  
ctg4466□ctg149□ctg204□WAG-2K8  
ctg4466□ctg149□ctg204□WAG-29F24  
ctg4466□ctg149□ctg204□WAG-52B4  
ctg4466□ctg149□ctg204□WAG-56G4  
ctg4466□ctg149□ctg204□WAG-65J14  
ctg4466□ctg149□ctg204□WAG-74F1  
ctg4466□ctg149□ctg204□WAG-82A11  
ctg4466□ctg149□ctg204□WAG-96E15  
ctg4466□ctg149□ctg204□WAG-100D14  
ctg4466□ctg149□ctg204□WAG-115D19  
ctg4466□ctg149□ctg204□WAG-121I11  
ctg4466□ctg2736□□WAG-90N1  
ctg4466□ctg2736□ctg3494□WAG-69G8  
ctg4466□ctg2736□ctg3494□WAG-75C2  
ctg4466□ctg2736□ctg3494□WAG-117H18  
ctg4466□ctg2736□ctg3494□WAG-121J18  
ctg4466□ctg2784□ctg2770□WAG-32C20  
ctg4466□ctg2784□ctg2770□WAG-42H23  
ctg4466□ctg2784□ctg2770□WAG-49A21  
ctg4466□ctg2784□ctg2770□WAG-63D4  
ctg4466□ctg2784□ctg2770□WAG-64G19  
ctg4467□□□WAG-116E23  
ctg4467□ctg91□ctg66□WAG-10P5  
ctg4467□ctg91□ctg66□WAG-27N21  
ctg4467□ctg91□ctg66□WAG-31B8  
ctg4467□ctg91□ctg66□WAG-35I2  
ctg4467□ctg91□ctg66□WAG-40F18  
ctg4467□ctg91□ctg66□WAG-40P9  
ctg4467□ctg91□ctg66□WAG-48F9  
ctg4467□ctg91□ctg66□WAG-49L9  
ctg4467□ctg91□ctg66□WAG-62L24  
ctg4467□ctg91□ctg66□WAG-70F21  
ctg4467□ctg91□ctg66□WAG-76P18  
ctg4467□ctg91□ctg66□WAG-111M4  
ctg4468□□□WAG-31F21  
ctg4468□□□WAG-38J15  
ctg4468□ctg3404□□WAG-47G21  
ctg4468□ctg3404□ctg4456□WAG-10M12

ctg4468□ctg3404□ctg4456□WAG-25B5  
ctg4469□□□WAG-29L20  
ctg4469□□□WAG-31F24  
ctg4469□ctg23□□WAG-112L14  
ctg4469□ctg23□ctg27□WAG-2E18  
ctg4469□ctg23□ctg27□WAG-11B21  
ctg4469□ctg23□ctg27□WAG-17G20  
ctg4469□ctg23□ctg27□WAG-18K21  
ctg4469□ctg23□ctg27□WAG-20N10  
ctg4469□ctg23□ctg27□WAG-52A22  
ctg4469□ctg23□ctg27□WAG-53G2  
ctg4469□ctg23□ctg27□WAG-54I19  
ctg4469□ctg23□ctg27□WAG-62H5  
ctg4469□ctg23□ctg27□WAG-78M3  
ctg4469□ctg23□ctg27□WAG-87C14  
ctg4469□ctg23□ctg27□WAG-89F22  
ctg4469□ctg23□ctg27□WAG-96H16  
ctg4469□ctg23□ctg27□WAG-102K10  
ctg4469□ctg23□ctg27□WAG-112D1  
ctg447□□□WAG-3P16  
ctg447□ctg1217□ctg1416□WAG-38B4  
ctg447□ctg1217□ctg1416□WAG-48N21  
ctg447□ctg1217□ctg1416□WAG-49H19  
ctg447□ctg1217□ctg1416□WAG-62I11  
ctg447□ctg1217□ctg1416□WAG-71H2  
ctg447□ctg1217□ctg1416□WAG-75O13  
ctg447□ctg1217□ctg1416□WAG-88B9  
ctg447□ctg1217□ctg1416□WAG-89D6  
ctg447□ctg1217□ctg1416□WAG-94K5  
ctg447□ctg1217□ctg1416□WAG-107H2  
ctg447□ctg1217□ctg1416□WAG-123P1  
ctg447□ctg1217□ctg1416□WAG-124L3  
ctg447□ctg1217□ctg1416□WAG-128P3  
ctg447□ctg1464□ctg1482□WAG-32L16  
ctg447□ctg1464□ctg1482□WAG-37K23  
ctg447□ctg1464□ctg1482□WAG-72K15  
ctg447□ctg1464□ctg1482□WAG-113G13  
ctg447□ctg2157□ctg2827□WAG-68L5  
ctg447□ctg2157□ctg2827□WAG-73L17  
ctg447□ctg2157□ctg2827□WAG-101J22  
ctg447□ctg2157□ctg2827□WAG-111N2  
ctg4470□□□WAG-11C21  
ctg4470□□□WAG-87D9  
ctg4470□ctg1590□□WAG-80H11  
ctg4470□ctg1590□□WAG-127D3  
ctg4470□ctg1590□ctg2473□WAG-41O12  
ctg4470□ctg1590□ctg2473□WAG-52N1  
ctg4470□ctg1590□ctg2473□WAG-79B13  
ctg4470□ctg1590□ctg2473□WAG-127O5  
ctg4471□□□WAG-73P22  
ctg4471□ctg2622□ctg3302□WAG-46E8  
ctg4471□ctg2622□ctg3302□WAG-64M9  
ctg4471□ctg2622□ctg3302□WAG-100N19  
ctg4471□ctg2622□ctg3302□WAG-107J21  
ctg4471□ctg5798□□WAG-103B21  
ctg4471□ctg5798□□WAG-110K15

ctg4471□ctg861□□WAG-21J14  
ctg4471□ctg861□□WAG-83P13  
ctg4471□ctg861□□WAG-95H12  
ctg4471□ctg861□□WAG-103P7  
ctg4471□ctg861□ctg882□WAG-20L19  
ctg4471□ctg861□ctg882□WAG-28B14  
ctg4471□ctg861□ctg882□WAG-57D9  
ctg4471□ctg861□ctg882□WAG-68N19  
ctg4471□ctg861□ctg882□WAG-70F8  
ctg4471□ctg861□ctg882□WAG-73F1  
ctg4471□ctg861□ctg882□WAG-83P7  
ctg4471□ctg861□ctg882□WAG-92J8  
ctg4471□ctg861□ctg882□WAG-102O11  
ctg4472□□□WAG-17E14  
ctg4472□ctg2203□ctg2081□WAG-20I10  
ctg4472□ctg2203□ctg2081□WAG-48O4  
ctg4472□ctg2203□ctg2081□WAG-98J1  
ctg4472□ctg2203□ctg2081□WAG-114F1  
ctg4472□ctg6225□□WAG-29G4  
ctg4472□ctg6225□□WAG-112P10  
ctg4473□□□WAG-9E13  
ctg4473□□□WAG-40P20  
ctg4473□ctg3912□□WAG-38D5  
ctg4473□ctg3912□ctg5685□WAG-10F22  
ctg4473□ctg3912□ctg5685□WAG-50I16  
ctg4473□ctg3912□ctg6123□WAG-70P10  
ctg4473□ctg3912□ctg6123□WAG-104A21  
ctg4473□ctg4271□ctg4463□WAG-100L24  
ctg4473□ctg4271□ctg4463□WAG-115H17  
ctg4473□ctg5941□□WAG-87C13  
ctg4473□ctg5941□□WAG-90H4  
ctg4474□ctg5392□ctg6367□WAG-94J21  
ctg4474□ctg5392□ctg6367□WAG-111O3  
ctg4475□□□WAG-91P23  
ctg4475□ctg5072□ctg5620□WAG-2O8  
ctg4475□ctg5072□ctg5620□WAG-104L20  
ctg4476□ctg4889□ctg5212□WAG-53J18  
ctg4476□ctg4889□ctg5212□WAG-110G9  
ctg4477□ctg4793□ctg5026□WAG-28M19  
ctg4477□ctg4793□ctg5026□WAG-126F6  
ctg4478□ctg4593□□WAG-54M21  
ctg4478□ctg4593□□WAG-86A3  
ctg4478□ctg4593□□WAG-102D4  
ctg4479□□□WAG-11L7  
ctg4479□□□WAG-21G11  
ctg4479□□□WAG-85O20  
ctg4479□□□WAG-107I17  
ctg4479□ctg1053□□WAG-15P11  
ctg4479□ctg1053□□WAG-76E22  
ctg4479□ctg1053□ctg1224□WAG-42J8  
ctg4479□ctg1053□ctg1224□WAG-44A3  
ctg4479□ctg1053□ctg1224□WAG-58H22  
ctg4479□ctg1053□ctg1224□WAG-61K15  
ctg4479□ctg1053□ctg1224□WAG-66H14  
ctg4479□ctg1053□ctg1224□WAG-113N1  
ctg4479□ctg3622□□WAG-46F17

ctg4479□ctg3622□ctg4910□WAG-22I11  
ctg4479□ctg3622□ctg4910□WAG-59N9  
ctg4479□ctg4521□ctg4653□WAG-47M21  
ctg4479□ctg4521□ctg4653□WAG-63G19  
ctg448□ctg1225□□WAG-40C7  
ctg448□ctg1225□□WAG-55I13  
ctg448□ctg1225□□WAG-85F21  
ctg448□ctg1225□ctg1800□WAG-17M14  
ctg448□ctg1225□ctg1800□WAG-69E21  
ctg448□ctg1225□ctg1800□WAG-72P22  
ctg448□ctg1225□ctg1800□WAG-73E23  
ctg448□ctg1225□ctg1800□WAG-74M12  
ctg448□ctg1225□ctg1800□WAG-127K22  
ctg4480□ctg4252□ctg4453□WAG-57O13  
ctg4480□ctg4252□ctg4453□WAG-67F1  
ctg4481□ctg4111□□WAG-39I10  
ctg4481□ctg4111□ctg6258□WAG-4C14  
ctg4481□ctg4111□ctg6258□WAG-92D3  
ctg4482□□□WAG-7F15  
ctg4482□□□WAG-33E12  
ctg4482□□□WAG-72F9  
ctg4482□ctg1559□□WAG-31N10  
ctg4482□ctg1559□ctg1438□WAG-14J16  
ctg4482□ctg1559□ctg1438□WAG-114J8  
ctg4482□ctg1559□ctg1438□WAG-118H1  
ctg4482□ctg1559□ctg1438□WAG-124C3  
ctg4482□ctg1559□ctg1857□WAG-14G6  
ctg4482□ctg1559□ctg1857□WAG-43J19  
ctg4482□ctg1559□ctg1857□WAG-81D20  
ctg4482□ctg1559□ctg1857□WAG-88P24  
ctg4482□ctg2077□□WAG-55A22  
ctg4482□ctg2077□ctg2637□WAG-31G1  
ctg4482□ctg2077□ctg2637□WAG-35P12  
ctg4482□ctg2077□ctg2637□WAG-99E2  
ctg4482□ctg2077□ctg2637□WAG-101H3  
ctg4482□ctg2077□ctg2637□WAG-112F9  
ctg4482□ctg3793□ctg4053□WAG-70B23  
ctg4482□ctg3793□ctg4053□WAG-103N10  
ctg4483□□□WAG-1C7  
ctg4483□□□WAG-108B9  
ctg4483□ctg3923□ctg4200□WAG-9D21  
ctg4483□ctg3923□ctg4200□WAG-100G17  
ctg4483□ctg3923□ctg4200□WAG-126F3  
ctg4484□□□WAG-128B20  
ctg4484□ctg4130□ctg4386□WAG-71M23  
ctg4484□ctg4130□ctg4386□WAG-71N23  
ctg4485□□□WAG-58C1  
ctg4485□□□WAG-74L4  
ctg4485□ctg3418□□WAG-113B12  
ctg4485□ctg3418□ctg4489□WAG-42A22  
ctg4485□ctg3418□ctg4489□WAG-90A20  
ctg4486□ctg3315□□WAG-82M13  
ctg4486□ctg3315□□WAG-125L16  
ctg4486□ctg3315□ctg5822□WAG-23P3  
ctg4486□ctg3315□ctg5822□WAG-130J15  
ctg4486□ctg4157□□WAG-45L7

ctg4486□ctg4157□ctg5935□WAG-34B4  
ctg4486□ctg4157□ctg5935□WAG-55D8  
ctg4487□ctg3266□□WAG-87E22  
ctg4487□ctg3266□ctg4319□WAG-90L1  
ctg4487□ctg3266□ctg4319□WAG-103E7  
ctg4488□ctg3559□ctg3724□WAG-108P4  
ctg4488□ctg3559□ctg3724□WAG-114I16  
ctg4488□ctg3559□ctg3724□WAG-116A6  
ctg4488□ctg4555□□WAG-45K1  
ctg4488□ctg4555□ctg6946□WAG-11A16  
ctg4488□ctg4555□ctg6946□WAG-69M5  
ctg4488□ctg6424□□WAG-23H3  
ctg4488□ctg6424□□WAG-114A3  
ctg4489□ctg2955□ctg2929□WAG-86P5  
ctg4489□ctg2955□ctg2929□WAG-107C10  
ctg4489□ctg2955□ctg2929□WAG-124P6  
ctg449□□□WAG-9B11  
ctg449□□□WAG-24L16  
ctg449□□□WAG-118L12  
ctg449□ctg1432□ctg1285□WAG-34B20  
ctg449□ctg1432□ctg1285□WAG-54L16  
ctg449□ctg1432□ctg1285□WAG-62N14  
ctg449□ctg1432□ctg1285□WAG-107M5  
ctg449□ctg1432□ctg1285□WAG-118L13  
ctg449□ctg5258□ctg6064□WAG-42M16  
ctg449□ctg5258□ctg6064□WAG-128N6  
ctg4490□□□WAG-9I7  
ctg4490□ctg2843□ctg2831□WAG-75K10  
ctg4490□ctg2843□ctg2831□WAG-99E17  
ctg4490□ctg2843□ctg2831□WAG-105N16  
ctg4490□ctg891□□WAG-31B19  
ctg4490□ctg891□ctg733□WAG-1G19  
ctg4490□ctg891□ctg733□WAG-13D21  
ctg4490□ctg891□ctg733□WAG-54L11  
ctg4490□ctg891□ctg733□WAG-67K6  
ctg4490□ctg891□ctg733□WAG-103A10  
ctg4490□ctg891□ctg733□WAG-122F23  
ctg4490□ctg891□ctg733□WAG-124L14  
ctg4490□ctg891□ctg733□WAG-124L15  
ctg4491□□□WAG-17E6  
ctg4491□□□WAG-70C21  
ctg4491□□□WAG-94M12  
ctg4491□ctg1334□ctg1184□WAG-17H6  
ctg4491□ctg1334□ctg1184□WAG-33C10  
ctg4491□ctg1334□ctg1184□WAG-55H20  
ctg4491□ctg1334□ctg1184□WAG-70N8  
ctg4491□ctg1334□ctg1184□WAG-70N13  
ctg4491□ctg1334□ctg1184□WAG-120N19  
ctg4491□ctg1334□ctg1184□WAG-123I4  
ctg4491□ctg2649□□WAG-40E16  
ctg4491□ctg2649□□WAG-80O7  
ctg4491□ctg2649□ctg3035□WAG-56J11  
ctg4491□ctg2649□ctg3035□WAG-108K2  
ctg4491□ctg2649□ctg3035□WAG-110M18  
ctg4491□ctg2649□ctg4587□WAG-16F4  
ctg4491□ctg2649□ctg4587□WAG-48N17



ctg4491□ctg3795□□WAG-37C3  
ctg4491□ctg3795□□WAG-74C16  
ctg4491□ctg3795□ctg4058□WAG-39B19  
ctg4491□ctg3795□ctg4058□WAG-104H6  
ctg4492□□□WAG-26N15  
ctg4492□□□WAG-39C17  
ctg4492□ctg2585□□WAG-12K5  
ctg4492□ctg2585□□WAG-50C12  
ctg4492□ctg2585□ctg4233□WAG-78A20  
ctg4492□ctg2585□ctg4233□WAG-79O14  
ctg4492□ctg5866□□WAG-54M19  
ctg4492□ctg5866□□WAG-125E23  
ctg4493□□□WAG-100E19  
ctg4493□□□WAG-117A5  
ctg4493□ctg3119□ctg3118□WAG-93H22  
ctg4493□ctg3119□ctg3118□WAG-96K12  
ctg4493□ctg3119□ctg3118□WAG-101F1  
ctg4494□□□WAG-5D12  
ctg4494□□□WAG-21N8  
ctg4494□□□WAG-71C12  
ctg4494□□□WAG-87C8  
ctg4494□ctg1645□□WAG-10G10  
ctg4494□ctg1645□□WAG-44H24  
ctg4494□ctg1645□□WAG-76G18  
ctg4494□ctg1645□ctg1990□WAG-12M9  
ctg4494□ctg1645□ctg1990□WAG-39F11  
ctg4494□ctg1645□ctg1990□WAG-81B14  
ctg4494□ctg1645□ctg3312□WAG-2D1  
ctg4494□ctg1645□ctg3312□WAG-22L15  
ctg4494□ctg1645□ctg3312□WAG-40H17  
ctg4494□ctg1645□ctg3776□WAG-15G23  
ctg4494□ctg1645□ctg3776□WAG-15K1  
ctg4494□ctg1645□ctg3776□WAG-116A5  
ctg4494□ctg1645□ctg5051□WAG-89C16  
ctg4494□ctg1645□ctg5051□WAG-118L24  
ctg4494□ctg2527□□WAG-77A22  
ctg4494□ctg2527□ctg3154□WAG-9H9  
ctg4494□ctg2527□ctg3154□WAG-17A1  
ctg4494□ctg2527□ctg3154□WAG-99H2  
ctg4495□□□WAG-77N8  
ctg4495□ctg2504□ctg2486□WAG-35H16  
ctg4495□ctg2504□ctg2486□WAG-71L23  
ctg4495□ctg2504□ctg2486□WAG-75A16  
ctg4495□ctg2504□ctg2486□WAG-93M19  
ctg4496□ctg2807□□WAG-72I19  
ctg4496□ctg2807□ctg3303□WAG-19G3  
ctg4496□ctg2807□ctg3303□WAG-52H18  
ctg4496□ctg2807□ctg3303□WAG-88I22  
ctg4496□ctg2807□ctg3303□WAG-117E15  
ctg4497□□□WAG-4N13  
ctg4497□□□WAG-14G17  
ctg4497□□□WAG-42N11  
ctg4497□□□WAG-48P13  
ctg4497□□□WAG-101D6  
ctg4497□ctg1241□□WAG-16K24  
ctg4497□ctg1241□ctg1385□WAG-18M6

ctg4497□ctg1241□ctg1385□WAG-36M6  
ctg4497□ctg1241□ctg1385□WAG-36P13  
ctg4497□ctg1241□ctg1385□WAG-74E20  
ctg4497□ctg1241□ctg1385□WAG-94G21  
ctg4497□ctg1241□ctg1385□WAG-103K20  
ctg4497□ctg1241□ctg1385□WAG-119E4  
ctg4497□ctg1241□ctg2552□WAG-50G16  
ctg4497□ctg1241□ctg2552□WAG-63C7  
ctg4497□ctg1241□ctg2552□WAG-91G22  
ctg4497□ctg1241□ctg2552□WAG-91I9  
ctg4497□ctg1241□ctg2552□WAG-104F21  
ctg4497□ctg1241□ctg2552□WAG-113J11  
ctg4497□ctg1241□ctg2552□WAG-118B8  
ctg4497□ctg1241□ctg2552□WAG-122G12  
ctg4497□ctg1241□ctg5088□WAG-49K14  
ctg4497□ctg1241□ctg5088□WAG-88D11  
ctg4497□ctg3726□□WAG-50I23  
ctg4497□ctg3726□ctg4879□WAG-11O8  
ctg4497□ctg3726□ctg4879□WAG-63E9  
ctg4497□ctg4178□ctg4417□WAG-59I6  
ctg4497□ctg4178□ctg4417□WAG-111F14  
ctg4497□ctg4178□ctg4417□WAG-112P18  
ctg4498□□□WAG-33F23  
ctg4498□□□WAG-59G16  
ctg4498□□□WAG-74K11  
ctg4498□ctg1921□□WAG-2L16  
ctg4498□ctg1921□□WAG-24E6  
ctg4498□ctg1921□□WAG-91B19  
ctg4498□ctg1921□□WAG-91C14  
ctg4498□ctg1921□□WAG-115M12  
ctg4498□ctg1921□ctg1758□WAG-35G4  
ctg4498□ctg1921□ctg1758□WAG-48D3  
ctg4498□ctg1921□ctg1758□WAG-108F3  
ctg4498□ctg5399□ctg6389□WAG-88H7  
ctg4498□ctg5399□ctg6389□WAG-128M6  
ctg4499□ctg1881□ctg1716□WAG-4L11  
ctg4499□ctg1881□ctg1716□WAG-4M8  
ctg4499□ctg1881□ctg1716□WAG-5B18  
ctg4499□ctg1881□ctg1716□WAG-89H15  
ctg4499□ctg1881□ctg1716□WAG-89M1  
ctg45□□□WAG-33N1  
ctg45□ctg234□□WAG-42E17  
ctg45□ctg234□ctg303□WAG-33A24  
ctg45□ctg234□ctg303□WAG-39O7  
ctg45□ctg234□ctg303□WAG-39O9  
ctg45□ctg234□ctg303□WAG-82H9  
ctg45□ctg234□ctg303□WAG-111I18  
ctg45□ctg234□ctg303□WAG-111I19  
ctg45□ctg234□ctg303□WAG-111I20  
ctg45□ctg234□ctg303□WAG-111J17  
ctg45□ctg234□ctg303□WAG-111J19  
ctg45□ctg234□ctg303□WAG-114I2  
ctg45□ctg4029□□WAG-81F8  
ctg45□ctg4029□ctg5496□WAG-110K5  
ctg45□ctg4029□ctg5496□WAG-120G3  
ctg450□ctg1264□□WAG-35E8

ctg450□ctg1264□ctg1408□WAG-92O8  
ctg450□ctg1264□ctg1408□WAG-93A16  
ctg450□ctg1264□ctg1408□WAG-100M5  
ctg450□ctg1264□ctg1408□WAG-112A18  
ctg450□ctg1264□ctg1813□WAG-31F4  
ctg450□ctg1264□ctg1813□WAG-42H3  
ctg450□ctg1264□ctg1813□WAG-51M6  
ctg450□ctg1264□ctg1813□WAG-73D2  
ctg450□ctg1264□ctg1813□WAG-74A5  
ctg450□ctg1264□ctg1813□WAG-90F1  
ctg450□ctg1264□ctg2732□WAG-26I18  
ctg450□ctg1264□ctg2732□WAG-63K10  
ctg450□ctg1264□ctg2732□WAG-88E22  
ctg450□ctg1264□ctg2732□WAG-89D13  
ctg450□ctg1264□ctg5637□WAG-93B7  
ctg450□ctg1264□ctg5637□WAG-111E15  
ctg4500□□□WAG-55M19  
ctg4500□ctg1698□□WAG-13D18  
ctg4500□ctg1698□ctg1981□WAG-103O15  
ctg4500□ctg1698□ctg1981□WAG-130K3  
ctg4500□ctg1698□ctg1981□WAG-130O17  
ctg4500□ctg191□ctg264□WAG-42G10  
ctg4500□ctg191□ctg264□WAG-48E11  
ctg4500□ctg191□ctg264□WAG-59P16  
ctg4500□ctg191□ctg264□WAG-62K22  
ctg4500□ctg191□ctg264□WAG-75J13  
ctg4500□ctg191□ctg264□WAG-89P18  
ctg4500□ctg191□ctg264□WAG-97H3  
ctg4500□ctg191□ctg264□WAG-103L11  
ctg4500□ctg191□ctg264□WAG-109F11  
ctg4500□ctg191□ctg264□WAG-115G5  
ctg4500□ctg191□ctg264□WAG-129P11  
ctg4501□ctg1653□ctg2563□WAG-27F3  
ctg4501□ctg1653□ctg2563□WAG-29L7  
ctg4501□ctg1653□ctg2563□WAG-70K24  
ctg4501□ctg1653□ctg2563□WAG-79M19  
ctg4501□ctg1653□ctg2563□WAG-109N18  
ctg4501□ctg1653□ctg2563□WAG-118P2  
ctg4502□ctg1613□ctg1467□WAG-49G18  
ctg4502□ctg1613□ctg1467□WAG-81I12  
ctg4502□ctg1613□ctg1467□WAG-88C13  
ctg4502□ctg1613□ctg1467□WAG-98M5  
ctg4502□ctg5070□ctg5610□WAG-32F24  
ctg4502□ctg5070□ctg5610□WAG-76L21  
ctg4503□□□WAG-12B22  
ctg4503□□□WAG-25F14  
ctg4503□ctg1619□□WAG-7I1  
ctg4503□ctg1619□□WAG-128I4  
ctg4503□ctg1619□ctg1728□WAG-33M3  
ctg4503□ctg1619□ctg1728□WAG-44E22  
ctg4503□ctg1619□ctg1728□WAG-52M8  
ctg4503□ctg1619□ctg1728□WAG-52N8  
ctg4503□ctg1619□ctg1728□WAG-65L5  
ctg4503□ctg1619□ctg1728□WAG-88G6  
ctg4503□ctg1619□ctg1728□WAG-101L5  
ctg4503□ctg1619□ctg1728□WAG-104H1

ctg4503□ctg1619□ctg1728□WAG-124H12  
ctg4503□ctg1619□ctg5192□WAG-65M13  
ctg4503□ctg1619□ctg5192□WAG-98J6  
ctg4504□□□WAG-6C8  
ctg4504□□□WAG-59A13  
ctg4504□ctg1794□□WAG-20G7  
ctg4504□ctg1794□□WAG-25B14  
ctg4504□ctg1794□□WAG-88L18  
ctg4504□ctg1794□□WAG-110O8  
ctg4504□ctg1794□□WAG-115N17  
ctg4504□ctg1794□ctg2365□WAG-22M1  
ctg4504□ctg1794□ctg2365□WAG-39L3  
ctg4504□ctg1794□ctg2365□WAG-50C17  
ctg4504□ctg1794□ctg2365□WAG-98O13  
ctg4504□ctg1794□ctg5869□WAG-13H8  
ctg4504□ctg1794□ctg5869□WAG-26E10  
ctg4504□ctg1794□ctg6543□WAG-78B3  
ctg4504□ctg1794□ctg6543□WAG-94I18  
ctg4505□□□WAG-47F20  
ctg4505□ctg1359□□WAG-93K21  
ctg4505□ctg1359□ctg1462□WAG-30M15  
ctg4505□ctg1359□ctg1462□WAG-38J20  
ctg4505□ctg1359□ctg1462□WAG-74G17  
ctg4505□ctg1359□ctg1462□WAG-106C16  
ctg4505□ctg1359□ctg1462□WAG-115O11  
ctg4505□ctg1359□ctg1462□WAG-130D4  
ctg4505□ctg2084□□WAG-108G8  
ctg4505□ctg2084□ctg3255□WAG-22O3  
ctg4505□ctg2084□ctg3255□WAG-62C24  
ctg4505□ctg2084□ctg3255□WAG-77E16  
ctg4505□ctg2084□ctg3719□WAG-31I3  
ctg4505□ctg2084□ctg3719□WAG-63F1  
ctg4505□ctg2084□ctg3719□WAG-124P2  
ctg4506□ctg1219□ctg1063□WAG-13A19  
ctg4506□ctg1219□ctg1063□WAG-98K21  
ctg4506□ctg1219□ctg1063□WAG-103K23  
ctg4506□ctg1219□ctg1063□WAG-128B11  
ctg4507□□□WAG-12N22  
ctg4507□□□WAG-61D1  
ctg4507□□□WAG-66G13  
ctg4507□□□WAG-88I2  
ctg4507□□□WAG-102D10  
ctg4507□ctg1597□□WAG-16L7  
ctg4507□ctg1597□□WAG-18P23  
ctg4507□ctg1597□□WAG-53F1  
ctg4507□ctg1597□ctg1445□WAG-1B9  
ctg4507□ctg1597□ctg1445□WAG-6H7  
ctg4507□ctg1597□ctg1445□WAG-31P23  
ctg4507□ctg1597□ctg1445□WAG-38D14  
ctg4507□ctg1597□ctg1445□WAG-41N5  
ctg4507□ctg1597□ctg1445□WAG-72I5  
ctg4507□ctg1597□ctg1445□WAG-74C12  
ctg4507□ctg1597□ctg1445□WAG-88C18  
ctg4507□ctg1597□ctg1445□WAG-104H19  
ctg4507□ctg1597□ctg1445□WAG-110L10  
ctg4507□ctg1597□ctg1445□WAG-117M3

ctg4507□ctg1597□ctg1445□WAG-121D24  
ctg4507□ctg3200□□WAG-25G16  
ctg4507□ctg3200□□WAG-99K24  
ctg4507□ctg3200□ctg5083□WAG-93N12  
ctg4507□ctg3200□ctg5083□WAG-115H5  
ctg4507□ctg3200□ctg5634□WAG-103J6  
ctg4507□ctg3200□ctg5634□WAG-104F15  
ctg4508□ctg1182□□WAG-1H7  
ctg4508□ctg1182□ctg1366□WAG-12C1  
ctg4508□ctg1182□ctg1366□WAG-25I7  
ctg4508□ctg1182□ctg1366□WAG-43D2  
ctg4508□ctg1182□ctg1366□WAG-82J17  
ctg4508□ctg1182□ctg1366□WAG-96P10  
ctg4508□ctg1182□ctg1366□WAG-99G11  
ctg4509□□□WAG-44P24  
ctg4509□□□WAG-45L12  
ctg4509□□□WAG-121C18  
ctg4509□□□WAG-125L13  
ctg4509□ctg1255□□WAG-2I6  
ctg4509□ctg1255□□WAG-29P7  
ctg4509□ctg1255□□WAG-53C20  
ctg4509□ctg1255□ctg2556□WAG-29J1  
ctg4509□ctg1255□ctg2556□WAG-43I12  
ctg4509□ctg1255□ctg2556□WAG-52P16  
ctg4509□ctg1255□ctg2556□WAG-53E14  
ctg4509□ctg1255□ctg2556□WAG-70P17  
ctg4509□ctg1255□ctg2556□WAG-76O13  
ctg4509□ctg1255□ctg2556□WAG-91K12  
ctg4509□ctg1255□ctg2556□WAG-92N9  
ctg4509□ctg1255□ctg2556□WAG-96L24  
ctg451□□□WAG-2O6  
ctg451□ctg1641□□WAG-24E15  
ctg451□ctg1641□ctg1979□WAG-3I3  
ctg451□ctg1641□ctg1979□WAG-5D24  
ctg451□ctg1641□ctg1979□WAG-8I20  
ctg451□ctg1641□ctg1979□WAG-86L23  
ctg451□ctg1641□ctg1979□WAG-127C18  
ctg451□ctg1641□ctg4484□WAG-118G18  
ctg451□ctg1641□ctg4484□WAG-128K16  
ctg4510□ctg1228□ctg1093□WAG-44P20  
ctg4510□ctg1228□ctg1093□WAG-71C16  
ctg4510□ctg1228□ctg1093□WAG-73D7  
ctg4510□ctg1228□ctg1093□WAG-81K14  
ctg4510□ctg1228□ctg1093□WAG-83F20  
ctg4510□ctg1228□ctg1093□WAG-84H1  
ctg4510□ctg1228□ctg1093□WAG-94N8  
ctg4510□ctg1228□ctg1093□WAG-102D9  
ctg4510□ctg1228□ctg1093□WAG-123F4  
ctg4511□ctg1020□□WAG-72M5  
ctg4511□ctg1020□ctg1175□WAG-62N23  
ctg4511□ctg1020□ctg1175□WAG-70L17  
ctg4511□ctg1020□ctg1175□WAG-78E21  
ctg4511□ctg1020□ctg1175□WAG-84D9  
ctg4511□ctg1020□ctg1175□WAG-102L8  
ctg4512□□□WAG-23F9  
ctg4512□ctg1184□□WAG-93F1

ctg4512□ctg1184□□WAG-110P10  
ctg4512□ctg1184□ctg1326□WAG-46K6  
ctg4512□ctg1184□ctg1326□WAG-82I2  
ctg4512□ctg1184□ctg1326□WAG-90N5  
ctg4512□ctg1184□ctg1326□WAG-93L8  
ctg4512□ctg1184□ctg1326□WAG-97L23  
ctg4512□ctg1184□ctg1326□WAG-102E2  
ctg4512□ctg1184□ctg1326□WAG-107H5  
ctg4512□ctg1184□ctg1326□WAG-110O19  
ctg4512□ctg1184□ctg1326□WAG-120P10  
ctg4512□ctg1184□ctg1326□WAG-124B15  
ctg4513□ctg921□□WAG-90K22  
ctg4513□ctg921□ctg1603□WAG-4H23  
ctg4513□ctg921□ctg1603□WAG-56D21  
ctg4513□ctg921□ctg1603□WAG-60A16  
ctg4513□ctg921□ctg1603□WAG-65M1  
ctg4513□ctg921□ctg1603□WAG-71O1  
ctg4513□ctg921□ctg1603□WAG-81J19  
ctg4513□ctg921□ctg1603□WAG-89I6  
ctg4513□ctg921□ctg1603□WAG-97C12  
ctg4513□ctg921□ctg1603□WAG-104H8  
ctg4513□ctg921□ctg1603□WAG-106L23  
ctg4513□ctg921□ctg1603□WAG-114O20  
ctg4514□□□WAG-13H20  
ctg4514□□□WAG-31O4  
ctg4514□□□WAG-40B3  
ctg4514□□□WAG-59O16  
ctg4514□□□WAG-92J23  
ctg4514□□□WAG-121K12  
ctg4514□ctg1083□□WAG-4B17  
ctg4514□ctg1083□ctg1489□WAG-44O14  
ctg4514□ctg1083□ctg1489□WAG-47F6  
ctg4514□ctg1083□ctg1489□WAG-57K8  
ctg4514□ctg1083□ctg1489□WAG-62N22  
ctg4514□ctg1083□ctg1489□WAG-85D8  
ctg4514□ctg1083□ctg1489□WAG-86P20  
ctg4514□ctg1083□ctg1489□WAG-89J23  
ctg4514□ctg1083□ctg1489□WAG-103N19  
ctg4514□ctg1083□ctg1489□WAG-122A15  
ctg4514□ctg1083□ctg3861□WAG-54O13  
ctg4514□ctg1083□ctg3861□WAG-61I15  
ctg4514□ctg1083□ctg3861□WAG-123B12  
ctg4514□ctg1379□ctg1219□WAG-31J16  
ctg4514□ctg1379□ctg1219□WAG-40H20  
ctg4514□ctg1379□ctg1219□WAG-53I5  
ctg4514□ctg1379□ctg1219□WAG-102A2  
ctg4514□ctg1379□ctg1219□WAG-114M6  
ctg4514□ctg790□□WAG-65M5  
ctg4514□ctg790□□WAG-120K19  
ctg4514□ctg790□ctg3030□WAG-60K20  
ctg4514□ctg790□ctg3030□WAG-106N6  
ctg4514□ctg790□ctg3030□WAG-114O6  
ctg4514□ctg790□ctg827□WAG-8M20  
ctg4514□ctg790□ctg827□WAG-39A2  
ctg4514□ctg790□ctg827□WAG-44H20  
ctg4514□ctg790□ctg827□WAG-46J7

ctg4514□ctg790□ctg827□WAG-79K5  
ctg4514□ctg790□ctg827□WAG-86F2  
ctg4514□ctg790□ctg827□WAG-98D9  
ctg4515□□□WAG-106J2  
ctg4515□ctg780□ctg633□WAG-12O20  
ctg4515□ctg780□ctg633□WAG-25I16  
ctg4515□ctg780□ctg633□WAG-42M24  
ctg4515□ctg780□ctg633□WAG-46K17  
ctg4515□ctg780□ctg633□WAG-51K5  
ctg4515□ctg780□ctg633□WAG-80I14  
ctg4516□ctg753□ctg3089□WAG-18F20  
ctg4516□ctg753□ctg3089□WAG-122H17  
ctg4516□ctg753□ctg3089□WAG-130L13  
ctg4516□ctg753□ctg795□WAG-28L7  
ctg4516□ctg753□ctg795□WAG-29M2  
ctg4516□ctg753□ctg795□WAG-90D14  
ctg4516□ctg753□ctg795□WAG-91L1  
ctg4516□ctg753□ctg795□WAG-111F20  
ctg4517□□□WAG-38M2  
ctg4517□□□WAG-93L14  
ctg4517□ctg1040□□WAG-1B14  
ctg4517□ctg1040□□WAG-23M18  
ctg4517□ctg1040□ctg2553□WAG-13M12  
ctg4517□ctg1040□ctg2553□WAG-35B13  
ctg4517□ctg1040□ctg2553□WAG-74M15  
ctg4517□ctg1040□ctg2553□WAG-109E20  
ctg4517□ctg1040□ctg4770□WAG-39D23  
ctg4517□ctg1040□ctg4770□WAG-83F11  
ctg4517□ctg1040□ctg4926□WAG-73P18  
ctg4517□ctg1040□ctg4926□WAG-81N23  
ctg4517□ctg1040□ctg6685□WAG-33A3  
ctg4517□ctg1040□ctg6685□WAG-91K2  
ctg4517□ctg4383□ctg4556□WAG-57P4  
ctg4517□ctg4383□ctg4556□WAG-88G8  
ctg4518□ctg717□□WAG-3J3  
ctg4518□ctg717□ctg730□WAG-10G21  
ctg4518□ctg717□ctg730□WAG-83K3  
ctg4518□ctg717□ctg730□WAG-112C1  
ctg4518□ctg717□ctg730□WAG-117G12  
ctg4518□ctg717□ctg730□WAG-117K10  
ctg4518□ctg717□ctg730□WAG-123A17  
ctg4519□□□WAG-39G12  
ctg4519□□□WAG-115D10  
ctg4519□ctg678□□WAG-24H6  
ctg4519□ctg678□ctg1336□WAG-10O10  
ctg4519□ctg678□ctg1336□WAG-51A16  
ctg4519□ctg678□ctg1336□WAG-56G14  
ctg4519□ctg678□ctg1336□WAG-76H4  
ctg4519□ctg678□ctg1336□WAG-87O7  
ctg4519□ctg678□ctg1336□WAG-108E5  
ctg4519□ctg678□ctg1336□WAG-128D17  
ctg4519□ctg678□ctg1808□WAG-29K6  
ctg4519□ctg678□ctg1808□WAG-46P9  
ctg4519□ctg678□ctg1808□WAG-53I10  
ctg4519□ctg678□ctg1808□WAG-80D2  
ctg4519□ctg678□ctg1808□WAG-108I5

ctg4519□ctg678□ctg722□WAG-50A19  
ctg4519□ctg678□ctg722□WAG-56J8  
ctg4519□ctg678□ctg722□WAG-85H10  
ctg4519□ctg678□ctg722□WAG-117E1  
ctg4519□ctg678□ctg722□WAG-120J17  
ctg4519□ctg678□ctg722□WAG-126G9  
ctg4519□ctg678□ctg722□WAG-127M10  
ctg4519□ctg678□ctg722□WAG-129K14  
ctg452□□□WAG-7M23  
ctg452□□□WAG-32B3  
ctg452□□□WAG-49H2  
ctg452□□□WAG-58I10  
ctg452□ctg1436□□WAG-5M18  
ctg452□ctg1436□□WAG-85N10  
ctg452□ctg1436□ctg1715□WAG-8K15  
ctg452□ctg1436□ctg1715□WAG-51C17  
ctg452□ctg1436□ctg1715□WAG-113M19  
ctg452□ctg1436□ctg1715□WAG-116C23  
ctg452□ctg1436□ctg1715□WAG-125I17  
ctg452□ctg1436□ctg2685□WAG-16L22  
ctg452□ctg1436□ctg2685□WAG-17I13  
ctg452□ctg1436□ctg2685□WAG-109K3  
ctg452□ctg1436□ctg2685□WAG-116M8  
ctg452□ctg1436□ctg3885□WAG-6I15  
ctg452□ctg1436□ctg3885□WAG-55E6  
ctg452□ctg1436□ctg3885□WAG-106O9  
ctg452□ctg3182□ctg3202□WAG-19L14  
ctg452□ctg3182□ctg3202□WAG-97H8  
ctg452□ctg3182□ctg3202□WAG-112E8  
ctg4520□□□WAG-115F3  
ctg4520□ctg59□□WAG-46P16  
ctg4520□ctg59□ctg115□WAG-15M15  
ctg4520□ctg59□ctg115□WAG-26A12  
ctg4520□ctg59□ctg115□WAG-44M22  
ctg4520□ctg59□ctg115□WAG-68B21  
ctg4520□ctg59□ctg115□WAG-75L2  
ctg4520□ctg59□ctg115□WAG-78H2  
ctg4520□ctg59□ctg115□WAG-80O3  
ctg4520□ctg59□ctg115□WAG-128H4  
ctg4520□ctg59□ctg144□WAG-9I12  
ctg4520□ctg59□ctg144□WAG-42P18  
ctg4520□ctg59□ctg144□WAG-45K11  
ctg4520□ctg59□ctg144□WAG-53O11  
ctg4520□ctg59□ctg144□WAG-57I21  
ctg4520□ctg59□ctg144□WAG-66I16  
ctg4520□ctg59□ctg144□WAG-70G4  
ctg4520□ctg59□ctg144□WAG-76C14  
ctg4520□ctg59□ctg144□WAG-76I19  
ctg4520□ctg59□ctg144□WAG-85H19  
ctg4520□ctg59□ctg144□WAG-96P18  
ctg4520□ctg59□ctg144□WAG-100N3  
ctg4520□ctg59□ctg144□WAG-105D23  
ctg4520□ctg59□ctg144□WAG-110D7  
ctg4520□ctg59□ctg144□WAG-114M23  
ctg4520□ctg59□ctg144□WAG-120B17  
ctg4520□ctg59□ctg144□WAG-122P13



ctg4520□ctg59□ctg144□WAG-129C23  
ctg4520□ctg59□ctg6192□WAG-14H9  
ctg4520□ctg59□ctg6192□WAG-94K8  
ctg4520□ctg59□ctg6747□WAG-37C15  
ctg4520□ctg59□ctg6747□WAG-72D21  
ctg4521□ctg560□□WAG-21P10  
ctg4521□ctg560□□WAG-102I21  
ctg4521□ctg560□ctg570□WAG-2K4  
ctg4521□ctg560□ctg570□WAG-3P20  
ctg4521□ctg560□ctg570□WAG-34O16  
ctg4521□ctg560□ctg570□WAG-44D2  
ctg4521□ctg560□ctg570□WAG-70J23  
ctg4521□ctg560□ctg570□WAG-71M11  
ctg4521□ctg560□ctg570□WAG-75C23  
ctg4521□ctg560□ctg570□WAG-76O22  
ctg4521□ctg560□ctg570□WAG-82E12  
ctg4521□ctg560□ctg570□WAG-88F20  
ctg4521□ctg560□ctg570□WAG-94O5  
ctg4521□ctg560□ctg570□WAG-94P7  
ctg4521□ctg560□ctg570□WAG-95B14  
ctg4521□ctg560□ctg570□WAG-108O6  
ctg4521□ctg560□ctg570□WAG-110F7  
ctg4521□ctg560□ctg570□WAG-114N14  
ctg4521□ctg560□ctg570□WAG-115B9  
ctg4521□ctg560□ctg570□WAG-124M10  
ctg4522□□□WAG-41H13  
ctg4522□ctg533□□WAG-31O20  
ctg4522□ctg533□ctg768□WAG-2D2  
ctg4522□ctg533□ctg768□WAG-13C8  
ctg4522□ctg533□ctg768□WAG-33D21  
ctg4522□ctg533□ctg768□WAG-34M3  
ctg4522□ctg533□ctg768□WAG-72H20  
ctg4522□ctg533□ctg768□WAG-100B19  
ctg4522□ctg533□ctg768□WAG-126O8  
ctg4523□□□WAG-122K2  
ctg4523□ctg736□ctg776□WAG-4E20  
ctg4523□ctg736□ctg776□WAG-13B21  
ctg4523□ctg736□ctg776□WAG-21F15  
ctg4523□ctg736□ctg776□WAG-35E1  
ctg4523□ctg736□ctg776□WAG-50C9  
ctg4523□ctg736□ctg776□WAG-53J6  
ctg4523□ctg736□ctg776□WAG-68F6  
ctg4523□ctg736□ctg776□WAG-76N14  
ctg4523□ctg736□ctg776□WAG-76P20  
ctg4523□ctg736□ctg776□WAG-92B20  
ctg4523□ctg736□ctg776□WAG-97E7  
ctg4523□ctg736□ctg776□WAG-107O2  
ctg4523□ctg736□ctg776□WAG-109B9  
ctg4523□ctg736□ctg776□WAG-124A9  
ctg4524□□□WAG-6E13  
ctg4524□ctg462□□WAG-95E7  
ctg4524□ctg462□□WAG-102I23  
ctg4524□ctg462□ctg609□WAG-1O13  
ctg4524□ctg462□ctg609□WAG-4O2  
ctg4524□ctg462□ctg609□WAG-26F7  
ctg4524□ctg462□ctg609□WAG-74L11

ctg4524□ctg462□ctg609□WAG-79L1  
ctg4524□ctg462□ctg609□WAG-97C4  
ctg4524□ctg462□ctg609□WAG-109C16  
ctg4524□ctg462□ctg609□WAG-111L3  
ctg4524□ctg462□ctg609□WAG-121J11  
ctg4525□□□WAG-89I1  
ctg4525□ctg403□□WAG-6E12  
ctg4525□ctg403□□WAG-21I9  
ctg4525□ctg403□ctg2962□WAG-10K19  
ctg4525□ctg403□ctg2962□WAG-14K13  
ctg4525□ctg403□ctg2962□WAG-40O3  
ctg4525□ctg403□ctg665□WAG-34F16  
ctg4525□ctg403□ctg665□WAG-35A7  
ctg4525□ctg403□ctg665□WAG-101O3  
ctg4525□ctg403□ctg665□WAG-105G15  
ctg4525□ctg403□ctg665□WAG-127P24  
ctg4526□□□WAG-5N10  
ctg4526□□□WAG-31M3  
ctg4526□□□WAG-36F14  
ctg4526□□□WAG-42E10  
ctg4526□□□WAG-77L22  
ctg4526□□□WAG-124O13  
ctg4526□ctg1553□ctg2413□WAG-46D20  
ctg4526□ctg1553□ctg2413□WAG-47D5  
ctg4526□ctg1553□ctg2413□WAG-66J3  
ctg4526□ctg1553□ctg2413□WAG-73N22  
ctg4526□ctg1553□ctg2413□WAG-76A8  
ctg4526□ctg1553□ctg2413□WAG-86J17  
ctg4526□ctg1553□ctg2413□WAG-121E10  
ctg4526□ctg1553□ctg4985□WAG-11F15  
ctg4526□ctg1553□ctg4985□WAG-66B8  
ctg4526□ctg277□□WAG-94O15  
ctg4526□ctg277□ctg215□WAG-8F11  
ctg4526□ctg277□ctg215□WAG-56I16  
ctg4526□ctg277□ctg215□WAG-62G14  
ctg4526□ctg277□ctg215□WAG-78P17  
ctg4526□ctg277□ctg215□WAG-85P8  
ctg4526□ctg277□ctg215□WAG-86N8  
ctg4526□ctg277□ctg215□WAG-90H14  
ctg4526□ctg277□ctg215□WAG-94C2  
ctg4526□ctg277□ctg215□WAG-111N19  
ctg4526□ctg277□ctg215□WAG-120N11  
ctg4526□ctg770□□WAG-28H10  
ctg4526□ctg770□ctg2119□WAG-72N22  
ctg4526□ctg770□ctg2119□WAG-90K16  
ctg4526□ctg770□ctg2119□WAG-109M18  
ctg4526□ctg770□ctg2119□WAG-129L1  
ctg4526□ctg770□ctg623□WAG-18I9  
ctg4526□ctg770□ctg623□WAG-36P16  
ctg4526□ctg770□ctg623□WAG-52G13  
ctg4526□ctg770□ctg623□WAG-58H4  
ctg4526□ctg770□ctg623□WAG-62P11  
ctg4526□ctg770□ctg623□WAG-68P10  
ctg4526□ctg770□ctg623□WAG-110E21  
ctg4526□ctg770□ctg623□WAG-118O17  
ctg4527□□□WAG-6H11

ctg4527□ctg265□ctg208□WAG-3O18  
ctg4527□ctg265□ctg208□WAG-11J2  
ctg4527□ctg265□ctg208□WAG-110O15  
ctg4527□ctg265□ctg208□WAG-119N19  
ctg4527□ctg265□ctg208□WAG-122L24  
ctg4527□ctg265□ctg208□WAG-123J12  
ctg4527□ctg265□ctg208□WAG-127A5  
ctg4528□ctg242□□WAG-35B21  
ctg4528□ctg242□ctg320□WAG-2L2  
ctg4528□ctg242□ctg320□WAG-7J7  
ctg4528□ctg242□ctg320□WAG-8C8  
ctg4528□ctg242□ctg320□WAG-16B9  
ctg4528□ctg242□ctg320□WAG-16P15  
ctg4528□ctg242□ctg320□WAG-20F3  
ctg4528□ctg242□ctg320□WAG-23H12  
ctg4528□ctg242□ctg320□WAG-38G7  
ctg4528□ctg242□ctg320□WAG-60N22  
ctg4528□ctg242□ctg320□WAG-67I12  
ctg4528□ctg242□ctg320□WAG-73O15  
ctg4528□ctg242□ctg320□WAG-82H11  
ctg4528□ctg242□ctg320□WAG-83F10  
ctg4528□ctg242□ctg320□WAG-86E23  
ctg4528□ctg242□ctg320□WAG-95G11  
ctg4528□ctg242□ctg320□WAG-106N24  
ctg4528□ctg242□ctg320□WAG-114J3  
ctg4528□ctg242□ctg320□WAG-116F4  
ctg4529□ctg235□ctg188□WAG-6O7  
ctg4529□ctg235□ctg188□WAG-30C18  
ctg4529□ctg235□ctg188□WAG-42P22  
ctg4529□ctg235□ctg188□WAG-70O18  
ctg4529□ctg235□ctg188□WAG-85M15  
ctg4529□ctg235□ctg188□WAG-92H2  
ctg4529□ctg235□ctg188□WAG-94D8  
ctg4529□ctg235□ctg188□WAG-99L9  
ctg4529□ctg235□ctg188□WAG-107F20  
ctg4529□ctg235□ctg188□WAG-112M3  
ctg453□□□WAG-21E6  
ctg453□ctg1392□□WAG-9E20  
ctg453□ctg1392□□WAG-77F23  
ctg453□ctg1392□□WAG-86A14  
ctg453□ctg1392□□WAG-94B6  
ctg453□ctg1392□ctg2014□WAG-18H12  
ctg453□ctg1392□ctg2014□WAG-29A2  
ctg453□ctg1392□ctg2014□WAG-63I6  
ctg453□ctg1392□ctg2014□WAG-100P24  
ctg453□ctg1392□ctg2014□WAG-101D1  
ctg453□ctg1392□ctg3227□WAG-13K13  
ctg453□ctg1392□ctg3227□WAG-38G1  
ctg453□ctg1392□ctg3227□WAG-86P14  
ctg4530□□□WAG-56O15  
ctg4530□□□WAG-88O12  
ctg4530□□□WAG-121H8  
ctg4530□ctg3396□ctg3493□WAG-36M9  
ctg4530□ctg3396□ctg3493□WAG-58A10  
ctg4530□ctg3396□ctg3493□WAG-121N8  
ctg4530□ctg347□□WAG-9P18

ctg4530□ctg347□□WAG-22I1  
ctg4530□ctg347□ctg441□WAG-7B2  
ctg4530□ctg347□ctg441□WAG-11N17  
ctg4530□ctg347□ctg441□WAG-23M6  
ctg4530□ctg347□ctg441□WAG-32G9  
ctg4530□ctg347□ctg441□WAG-33I19  
ctg4530□ctg347□ctg441□WAG-63P7  
ctg4530□ctg347□ctg441□WAG-89K2  
ctg4530□ctg347□ctg441□WAG-98C3  
ctg4530□ctg347□ctg441□WAG-98O2  
ctg4530□ctg347□ctg441□WAG-99J2  
ctg4530□ctg347□ctg441□WAG-108P16  
ctg4530□ctg347□ctg441□WAG-118H5  
ctg4531□□□WAG-17L17  
ctg4531□□□WAG-34O1  
ctg4531□□□WAG-43F11  
ctg4531□□□WAG-88O19  
ctg4531□ctg204□□WAG-27I22  
ctg4531□ctg204□□WAG-42M6  
ctg4531□ctg204□ctg265□WAG-10D14  
ctg4531□ctg204□ctg265□WAG-52F15  
ctg4531□ctg204□ctg265□WAG-80A10  
ctg4531□ctg204□ctg265□WAG-82H24  
ctg4531□ctg204□ctg265□WAG-86K21  
ctg4531□ctg204□ctg265□WAG-90I21  
ctg4531□ctg204□ctg265□WAG-109I7  
ctg4531□ctg204□ctg265□WAG-125O16  
ctg4531□ctg2344□□WAG-39A18  
ctg4531□ctg2344□□WAG-52G15  
ctg4531□ctg2344□□WAG-97E14  
ctg4531□ctg2344□□WAG-128F19  
ctg4531□ctg2344□ctg3819□WAG-32N8  
ctg4531□ctg2344□ctg3819□WAG-32P8  
ctg4531□ctg2344□ctg3819□WAG-45C5  
ctg4531□ctg2344□ctg3819□WAG-103B11  
ctg4531□ctg2344□ctg3819□WAG-103C9  
ctg4531□ctg5637□□WAG-82C13  
ctg4531□ctg5637□□WAG-101K18  
ctg4532□□□WAG-6A18  
ctg4532□ctg165□□WAG-16L12  
ctg4532□ctg165□ctg179□WAG-58P16  
ctg4532□ctg165□ctg179□WAG-66C20  
ctg4532□ctg165□ctg179□WAG-85I19  
ctg4532□ctg165□ctg179□WAG-87I24  
ctg4532□ctg165□ctg179□WAG-92N1  
ctg4532□ctg165□ctg179□WAG-108K5  
ctg4532□ctg165□ctg179□WAG-119L5  
ctg4532□ctg165□ctg806□WAG-15E4  
ctg4532□ctg165□ctg806□WAG-31I20  
ctg4532□ctg165□ctg806□WAG-41L5  
ctg4532□ctg165□ctg806□WAG-42D15  
ctg4532□ctg165□ctg806□WAG-71K9  
ctg4532□ctg165□ctg806□WAG-74N24  
ctg4532□ctg165□ctg806□WAG-102E16  
ctg4532□ctg2647□□WAG-103D24  
ctg4532□ctg2647□ctg4186□WAG-18I7

ctg4532□ctg2647□ctg4186□WAG-42G22  
ctg4532□ctg2647□ctg4186□WAG-60L10  
ctg4532□ctg2647□ctg5237□WAG-63N9  
ctg4532□ctg2647□ctg5237□WAG-106I11  
ctg4533□□□WAG-18B8  
ctg4533□□□WAG-102I4  
ctg4533□ctg198□ctg1454□WAG-9O16  
ctg4533□ctg198□ctg1454□WAG-42A15  
ctg4533□ctg198□ctg1454□WAG-44L16  
ctg4533□ctg198□ctg1454□WAG-50A5  
ctg4533□ctg198□ctg1454□WAG-50K11  
ctg4533□ctg198□ctg1454□WAG-53L22  
ctg4533□ctg198□ctg1454□WAG-82O18  
ctg4533□ctg198□ctg1454□WAG-92D23  
ctg4533□ctg198□ctg162□WAG-18I10  
ctg4533□ctg198□ctg162□WAG-48B8  
ctg4533□ctg198□ctg162□WAG-73K22  
ctg4533□ctg198□ctg162□WAG-76I1  
ctg4533□ctg198□ctg162□WAG-105I1  
ctg4533□ctg198□ctg162□WAG-112G12  
ctg4533□ctg198□ctg162□WAG-121B15  
ctg4533□ctg198□ctg162□WAG-126F23  
ctg4533□ctg198□ctg162□WAG-127C3  
ctg4533□ctg198□ctg162□WAG-128H13  
ctg4533□ctg806□□WAG-9J14  
ctg4533□ctg806□□WAG-17N13  
ctg4533□ctg806□□WAG-20J1  
ctg4533□ctg806□□WAG-36I19  
ctg4533□ctg806□ctg1129□WAG-13K15  
ctg4533□ctg806□ctg1129□WAG-30N16  
ctg4533□ctg806□ctg1129□WAG-65O19  
ctg4533□ctg806□ctg1129□WAG-66B10  
ctg4533□ctg806□ctg1129□WAG-98I19  
ctg4533□ctg806□ctg1129□WAG-118J24  
ctg4533□ctg806□ctg1998□WAG-11G24  
ctg4533□ctg806□ctg1998□WAG-91E5  
ctg4533□ctg806□ctg1998□WAG-100L6  
ctg4533□ctg806□ctg1998□WAG-106B12  
ctg4533□ctg806□ctg2011□WAG-59P21  
ctg4533□ctg806□ctg2011□WAG-129G20  
ctg4533□ctg806□ctg2011□WAG-129O19  
ctg4533□ctg806□ctg3938□WAG-12A23  
ctg4533□ctg806□ctg3938□WAG-84N12  
ctg4533□ctg806□ctg3938□WAG-118E11  
ctg4534□ctg3□□WAG-75B15  
ctg4534□ctg3□ctg3□WAG-1E2  
ctg4534□ctg3□ctg3□WAG-11N18  
ctg4534□ctg3□ctg3□WAG-42F24  
ctg4534□ctg3□ctg3□WAG-46A16  
ctg4534□ctg3□ctg3□WAG-62I12  
ctg4534□ctg3□ctg3□WAG-67M11  
ctg4534□ctg3□ctg3□WAG-77P21  
ctg4534□ctg3□ctg3□WAG-88H10  
ctg4534□ctg3□ctg3□WAG-91K19  
ctg4534□ctg3□ctg3□WAG-94D12  
ctg4534□ctg3□ctg3□WAG-96E4

ctg4534□ctg3□ctg3□WAG-100B3  
ctg4534□ctg3□ctg3□WAG-105C19  
ctg4534□ctg3□ctg3□WAG-105H10  
ctg4534□ctg3□ctg3□WAG-110C8  
ctg4534□ctg3□ctg3□WAG-113L18  
ctg4534□ctg3□ctg3□WAG-116C10  
ctg4534□ctg3□ctg3□WAG-125G24  
ctg4534□ctg3□ctg3□WAG-126B23  
ctg4534□ctg3176□□WAG-113H5  
ctg4534□ctg3176□ctg3222□WAG-23G15  
ctg4534□ctg3176□ctg3222□WAG-80M16  
ctg4534□ctg3176□ctg3222□WAG-97E22  
ctg4534□ctg3176□ctg3222□WAG-105C22  
ctg4534□ctg3176□ctg6252□WAG-53J12  
ctg4534□ctg3176□ctg6252□WAG-104G8  
ctg4535□□□WAG-5J21  
ctg4535□□□WAG-60I7  
ctg4535□ctg145□□WAG-7L12  
ctg4535□ctg145□□WAG-25N4  
ctg4535□ctg145□□WAG-32D3  
ctg4535□ctg145□□WAG-36E23  
ctg4535□ctg145□□WAG-70L13  
ctg4535□ctg145□□WAG-77A4  
ctg4535□ctg145□□WAG-83C20  
ctg4535□ctg145□□WAG-105H22  
ctg4535□ctg145□ctg2643□WAG-15O8  
ctg4535□ctg145□ctg2643□WAG-44M5  
ctg4535□ctg145□ctg2643□WAG-77C12  
ctg4535□ctg145□ctg279□WAG-15H13  
ctg4535□ctg145□ctg279□WAG-17P17  
ctg4535□ctg145□ctg279□WAG-25P2  
ctg4535□ctg145□ctg279□WAG-29J10  
ctg4535□ctg145□ctg279□WAG-30M10  
ctg4535□ctg145□ctg279□WAG-40I17  
ctg4535□ctg145□ctg279□WAG-41C9  
ctg4535□ctg145□ctg279□WAG-43J17  
ctg4535□ctg145□ctg279□WAG-44F17  
ctg4535□ctg145□ctg279□WAG-55H17  
ctg4535□ctg145□ctg279□WAG-58H10  
ctg4535□ctg145□ctg279□WAG-60I23  
ctg4535□ctg145□ctg279□WAG-73L24  
ctg4535□ctg145□ctg279□WAG-98J19  
ctg4535□ctg145□ctg279□WAG-106D13  
ctg4535□ctg145□ctg279□WAG-120K16  
ctg4535□ctg145□ctg3615□WAG-42C2  
ctg4535□ctg145□ctg3615□WAG-92E11  
ctg4535□ctg145□ctg3615□WAG-99O6  
ctg4535□ctg2532□ctg2458□WAG-25N9  
ctg4535□ctg2532□ctg2458□WAG-122L12  
ctg4535□ctg6001□□WAG-60J18  
ctg4535□ctg6001□□WAG-78G5  
ctg4535□ctg912□□WAG-30H22  
ctg4535□ctg912□ctg999□WAG-23D22  
ctg4535□ctg912□ctg999□WAG-28P4  
ctg4535□ctg912□ctg999□WAG-32A24  
ctg4535□ctg912□ctg999□WAG-44G3

ctg4535□ctg912□ctg999□WAG-60D5  
ctg4535□ctg912□ctg999□WAG-63O14  
ctg4535□ctg912□ctg999□WAG-72B20  
ctg4535□ctg912□ctg999□WAG-83K12  
ctg4535□ctg912□ctg999□WAG-89G16  
ctg4535□ctg912□ctg999□WAG-94B2  
ctg4535□ctg912□ctg999□WAG-119O3  
ctg4535□ctg912□ctg999□WAG-124P18  
ctg4535□ctg912□ctg999□WAG-126H9  
ctg4535□ctg912□ctg999□WAG-126P16  
ctg4536□□□WAG-58D16  
ctg4536□□□WAG-60G8  
ctg4536□□□WAG-96K18  
ctg4536□ctg146□ctg166□WAG-25C4  
ctg4536□ctg146□ctg166□WAG-47I18  
ctg4536□ctg146□ctg166□WAG-64D23  
ctg4536□ctg146□ctg166□WAG-71K17  
ctg4536□ctg146□ctg166□WAG-78A10  
ctg4536□ctg146□ctg166□WAG-83E22  
ctg4536□ctg146□ctg166□WAG-89L9  
ctg4536□ctg146□ctg166□WAG-94H5  
ctg4536□ctg146□ctg166□WAG-98A10  
ctg4536□ctg146□ctg166□WAG-106A14  
ctg4536□ctg146□ctg166□WAG-123C4  
ctg4536□ctg2068□□WAG-96I19  
ctg4536□ctg2068□ctg2524□WAG-42M10  
ctg4536□ctg2068□ctg2524□WAG-57P11  
ctg4536□ctg2068□ctg2524□WAG-129P17  
ctg4536□ctg227□ctg218□WAG-40C16  
ctg4536□ctg227□ctg218□WAG-46I12  
ctg4536□ctg227□ctg218□WAG-58O20  
ctg4536□ctg227□ctg218□WAG-68P13  
ctg4536□ctg227□ctg218□WAG-71A7  
ctg4536□ctg227□ctg218□WAG-73I2  
ctg4536□ctg227□ctg218□WAG-122G10  
ctg4536□ctg3186□ctg3211□WAG-37I5  
ctg4536□ctg3186□ctg3211□WAG-84K2  
ctg4536□ctg3186□ctg3211□WAG-111N22  
ctg4536□ctg3186□ctg5350□WAG-79K13  
ctg4536□ctg3186□ctg5350□WAG-103I11  
ctg4537□□□WAG-14C14  
ctg4537□□□WAG-26J4  
ctg4537□ctg2894□□WAG-123A15  
ctg4537□ctg2894□ctg3686□WAG-26B20  
ctg4537□ctg2894□ctg3686□WAG-119N7  
ctg4537□ctg37□□WAG-1I5  
ctg4537□ctg37□□WAG-7K5  
ctg4537□ctg37□□WAG-124M3  
ctg4537□ctg37□ctg532□WAG-8M12  
ctg4537□ctg37□ctg532□WAG-17I4  
ctg4537□ctg37□ctg532□WAG-25G17  
ctg4537□ctg37□ctg532□WAG-26K8  
ctg4537□ctg37□ctg532□WAG-38H23  
ctg4537□ctg37□ctg532□WAG-47E4  
ctg4537□ctg37□ctg532□WAG-47G9  
ctg4537□ctg37□ctg532□WAG-59J8

ctg4537□ctg37□ctg532□WAG-79H17  
ctg4537□ctg37□ctg532□WAG-87F4  
ctg4537□ctg37□ctg532□WAG-94E23  
ctg4537□ctg37□ctg532□WAG-98B11  
ctg4537□ctg37□ctg532□WAG-111A21  
ctg4537□ctg37□ctg532□WAG-113D3  
ctg4537□ctg37□ctg532□WAG-118L4  
ctg4537□ctg37□ctg532□WAG-125D5  
ctg4537□ctg37□ctg532□WAG-125P2  
ctg4537□ctg37□ctg70□WAG-25K8  
ctg4537□ctg37□ctg70□WAG-40J6  
ctg4537□ctg37□ctg70□WAG-49J20  
ctg4537□ctg37□ctg70□WAG-49N18  
ctg4537□ctg37□ctg70□WAG-60D19  
ctg4537□ctg37□ctg70□WAG-69F11  
ctg4537□ctg37□ctg70□WAG-76F7  
ctg4537□ctg37□ctg70□WAG-82G5  
ctg4537□ctg37□ctg70□WAG-91K24  
ctg4537□ctg37□ctg70□WAG-106B9  
ctg4537□ctg37□ctg70□WAG-125N19  
ctg4537□ctg3813□ctg5383□WAG-1M14  
ctg4537□ctg3813□ctg5383□WAG-52F19  
ctg4537□ctg3813□ctg5383□WAG-113G15  
ctg4537□ctg5696□□WAG-70J5  
ctg4537□ctg5696□□WAG-80P6  
ctg4538□□□WAG-24D14  
ctg4538□□□WAG-40B14  
ctg4538□□□WAG-61M4  
ctg4538□ctg155□□WAG-63D2  
ctg4538□ctg155□ctg212□WAG-29L8  
ctg4538□ctg155□ctg212□WAG-38P8  
ctg4538□ctg155□ctg212□WAG-47A11  
ctg4538□ctg155□ctg212□WAG-53H22  
ctg4538□ctg155□ctg212□WAG-67L7  
ctg4538□ctg155□ctg212□WAG-76D22  
ctg4538□ctg155□ctg212□WAG-86H6  
ctg4538□ctg155□ctg212□WAG-97A8  
ctg4538□ctg155□ctg212□WAG-114K1  
ctg4538□ctg155□ctg212□WAG-115F18  
ctg4538□ctg155□ctg212□WAG-118G23  
ctg4538□ctg155□ctg3486□WAG-68E10  
ctg4538□ctg155□ctg3486□WAG-113H9  
ctg4538□ctg155□ctg3486□WAG-115J8  
ctg4538□ctg322□ctg316□WAG-21G14  
ctg4538□ctg322□ctg316□WAG-22L1  
ctg4538□ctg322□ctg316□WAG-28N14  
ctg4538□ctg322□ctg316□WAG-32A22  
ctg4538□ctg322□ctg316□WAG-46I9  
ctg4538□ctg322□ctg316□WAG-50A1  
ctg4538□ctg322□ctg316□WAG-58H19  
ctg4538□ctg322□ctg316□WAG-63N20  
ctg4538□ctg322□ctg316□WAG-68F24  
ctg4538□ctg322□ctg316□WAG-72K8  
ctg4538□ctg3254□□WAG-28G23  
ctg4538□ctg3254□ctg4411□WAG-30B1  
ctg4538□ctg3254□ctg4411□WAG-72I6



ctg4539□□□WAG-34M20  
ctg4539□ctg351□□WAG-82B23  
ctg4539□ctg351□ctg2764□WAG-34F11  
ctg4539□ctg351□ctg2764□WAG-53M6  
ctg4539□ctg351□ctg2764□WAG-86A21  
ctg4539□ctg351□ctg2764□WAG-118G5  
ctg4539□ctg351□ctg428□WAG-55G14  
ctg4539□ctg351□ctg428□WAG-78E17  
ctg4539□ctg351□ctg428□WAG-83H4  
ctg4539□ctg351□ctg428□WAG-98H3  
ctg4539□ctg351□ctg428□WAG-101E7  
ctg4539□ctg351□ctg428□WAG-108N13  
ctg4539□ctg351□ctg428□WAG-117H16  
ctg4539□ctg351□ctg428□WAG-120J16  
ctg4539□ctg351□ctg428□WAG-126B4  
ctg4539□ctg5904□□WAG-84M20  
ctg4539□ctg5904□□WAG-125C1  
ctg454□□□WAG-32N22  
ctg454□□□WAG-65L9  
ctg454□□□WAG-87N2  
ctg454□□□WAG-91K9  
ctg454□ctg1235□□WAG-77C2  
ctg454□ctg1235□ctg1303□WAG-B11  
ctg454□ctg1235□ctg1303□WAG-20L20  
ctg454□ctg1235□ctg1303□WAG-44P3  
ctg454□ctg1235□ctg1303□WAG-77K13  
ctg454□ctg1235□ctg1303□WAG-79C2  
ctg454□ctg6075□□WAG-5C5  
ctg454□ctg6075□□WAG-72H6  
ctg4540□ctg4915□ctg5253□WAG-13I13  
ctg4540□ctg4915□ctg5253□WAG-58L4  
ctg4541□ctg1248□ctg1084□WAG-15L1  
ctg4541□ctg1248□ctg1084□WAG-47J11  
ctg4541□ctg1248□ctg1084□WAG-55E10  
ctg4541□ctg1248□ctg1084□WAG-62H18  
ctg4541□ctg1248□ctg1084□WAG-109E24  
ctg4541□ctg5563□ctg6714□WAG-25I2  
ctg4541□ctg5563□ctg6714□WAG-32N5  
ctg4542□ctg833□□WAG-6K3  
ctg4542□ctg833□□WAG-22P8  
ctg4542□ctg833□□WAG-69B13  
ctg4542□ctg833□ctg1601□WAG-3F6  
ctg4542□ctg833□ctg1601□WAG-6B18  
ctg4542□ctg833□ctg1601□WAG-22C9  
ctg4542□ctg833□ctg1601□WAG-37N20  
ctg4542□ctg833□ctg1601□WAG-42J24  
ctg4542□ctg833□ctg1601□WAG-116D8  
ctg4543□□□WAG-14L24  
ctg4543□□□WAG-55B15  
ctg4543□□□WAG-118B12  
ctg4544□ctg6403□□WAG-22H20  
ctg4544□ctg6403□□WAG-54J11  
ctg4545□□□WAG-21O8  
ctg4545□□□WAG-44J12  
ctg4545□ctg3486□□WAG-76E3  
ctg4545□ctg3486□□WAG-77B6

ctg4545□ctg3486□ctg6362□WAG-109M10  
ctg4545□ctg3486□ctg6362□WAG-120J23  
ctg4546□□□WAG-10J21  
ctg4546□□□WAG-88G16  
ctg4546□□□WAG-113E11  
ctg4546□ctg1066□ctg908□WAG-21N4  
ctg4546□ctg1066□ctg908□WAG-78K2  
ctg4546□ctg1066□ctg908□WAG-80B15  
ctg4546□ctg1066□ctg908□WAG-99B24  
ctg4546□ctg1066□ctg908□WAG-128C23  
ctg4546□ctg2149□ctg2027□WAG-24H4  
ctg4546□ctg2149□ctg2027□WAG-105L15  
ctg4546□ctg2149□ctg2027□WAG-128I15  
ctg4546□ctg2149□ctg2027□WAG-129P21  
ctg4547□□□WAG-31O9  
ctg4547□□□WAG-74E8  
ctg4547□ctg72□□WAG-10D17  
ctg4547□ctg72□□WAG-36D20  
ctg4547□ctg72□□WAG-47I1  
ctg4547□ctg72□□WAG-58J13  
ctg4547□ctg72□□WAG-88O18  
ctg4547□ctg72□□WAG-115O3  
ctg4547□ctg72□ctg3910□WAG-44K20  
ctg4547□ctg72□ctg3910□WAG-68I4  
ctg4547□ctg72□ctg3910□WAG-128L21  
ctg4547□ctg72□ctg65□WAG-25B9  
ctg4547□ctg72□ctg65□WAG-32N9  
ctg4547□ctg72□ctg65□WAG-42D16  
ctg4547□ctg72□ctg65□WAG-48B14  
ctg4547□ctg72□ctg65□WAG-68N22  
ctg4547□ctg72□ctg65□WAG-72B16  
ctg4547□ctg72□ctg65□WAG-85E17  
ctg4547□ctg72□ctg65□WAG-92B9  
ctg4547□ctg72□ctg65□WAG-95P9  
ctg4547□ctg72□ctg65□WAG-103A24  
ctg4547□ctg72□ctg65□WAG-121G10  
ctg4547□ctg72□ctg65□WAG-122I18  
ctg4547□ctg72□ctg65□WAG-122J18  
ctg4548□□□WAG-30P10  
ctg4548□□□WAG-57A23  
ctg4549□ctg5777□□WAG-25O9  
ctg4549□ctg5777□□WAG-38M1  
ctg455□ctg1380□□WAG-30M16  
ctg455□ctg1380□□WAG-126P13  
ctg455□ctg1380□ctg1220□WAG-20O18  
ctg455□ctg1380□ctg1220□WAG-55N18  
ctg455□ctg1380□ctg1220□WAG-72N12  
ctg455□ctg1380□ctg1220□WAG-82D8  
ctg455□ctg1380□ctg1220□WAG-101E19  
ctg455□ctg1380□ctg1220□WAG-104E15  
ctg4550□□□WAG-48I12  
ctg4550□ctg6400□□WAG-47C9  
ctg4550□ctg6400□□WAG-57B11  
ctg4551□ctg4743□□WAG-48D1  
ctg4551□ctg4743□□WAG-59E6  
ctg4551□ctg4743□□WAG-115J14

ctg4552□□□WAG-21E22  
ctg4552□ctg4551□□WAG-11N14  
ctg4552□ctg4551□□WAG-92G16  
ctg4552□ctg4551□□WAG-93H19  
ctg4553□ctg4239□□WAG-87L1  
ctg4553□ctg4239□ctg6159□WAG-83L1  
ctg4553□ctg4239□ctg6159□WAG-106B22  
ctg4554□□□WAG-18L24  
ctg4554□ctg4811□ctg5064□WAG-22O18  
ctg4554□ctg4811□ctg5064□WAG-65C1  
ctg4554□ctg5176□ctg5875□WAG-98D16  
ctg4554□ctg5176□ctg5875□WAG-119F17  
ctg4555□□□WAG-84G10  
ctg4555□□□WAG-114I22  
ctg4555□ctg3509□ctg3636□WAG-64G14  
ctg4555□ctg3509□ctg3636□WAG-122D18  
ctg4556□□□WAG-41P9  
ctg4556□□□WAG-52A24  
ctg4556□□□WAG-71G22  
ctg4556□ctg4221□□WAG-106E4  
ctg4556□ctg4221□ctg6096□WAG-1E20  
ctg4556□ctg4221□ctg6096□WAG-44F12  
ctg4556□ctg5078□ctg5632□WAG-57I14  
ctg4556□ctg5078□ctg5632□WAG-109C18  
ctg4557□□□WAG-120P9  
ctg4557□ctg3038□□WAG-50C10  
ctg4557□ctg3038□□WAG-81O15  
ctg4557□ctg3038□ctg5191□WAG-69J6  
ctg4557□ctg3038□ctg5191□WAG-114J24  
ctg4558□□□WAG-37B23  
ctg4558□ctg2957□ctg2941□WAG-42L12  
ctg4558□ctg2957□ctg2941□WAG-59M18  
ctg4558□ctg2957□ctg2941□WAG-61H13  
ctg4558□ctg2957□ctg2941□WAG-62K19  
ctg4558□ctg2957□ctg2941□WAG-66C5  
ctg4559□□□WAG-77F1  
ctg4559□ctg2778□ctg2760□WAG-9O10  
ctg4559□ctg2778□ctg2760□WAG-48F2  
ctg4559□ctg2778□ctg2760□WAG-87D15  
ctg456□□□WAG-14D14  
ctg456□□□WAG-15H2  
ctg456□□□WAG-94E21  
ctg456□□□WAG-109D1  
ctg456□□□WAG-129J18  
ctg456□ctg1481□ctg1332□WAG-48L11  
ctg456□ctg1481□ctg1332□WAG-61J5  
ctg456□ctg1481□ctg1332□WAG-63J6  
ctg456□ctg1481□ctg1332□WAG-71P15  
ctg456□ctg1481□ctg1332□WAG-124F5  
ctg456□ctg1481□ctg1332□WAG-130M2  
ctg456□ctg2454□□WAG-23M13  
ctg456□ctg2454□ctg2825□WAG-87B5  
ctg456□ctg2454□ctg2825□WAG-125K3  
ctg456□ctg2454□ctg2825□WAG-126F14  
ctg456□ctg2704□□WAG-9L15  
ctg456□ctg2704□□WAG-38N17

ctg456□ctg2704□ctg4569□WAG-10E17  
ctg456□ctg2704□ctg4569□WAG-84G24  
ctg456□ctg4429□ctg6772□WAG-27F17  
ctg456□ctg4429□ctg6772□WAG-63A23  
ctg456□ctg4429□ctg6777□WAG-2A5  
ctg456□ctg4429□ctg6777□WAG-10F8  
ctg456□ctg4482□ctg4619□WAG-45L11  
ctg456□ctg4482□ctg4619□WAG-111P19  
ctg456□ctg4783□ctg4997□WAG-93I12  
ctg456□ctg4783□ctg4997□WAG-99H20  
ctg4560□□□WAG-32I18  
ctg4560□□□WAG-82H14  
ctg4560□□□WAG-86B19  
ctg4560□□□WAG-90D13  
ctg4560□ctg2727□□WAG-12M11  
ctg4560□ctg2727□□WAG-42G4  
ctg4560□ctg2727□□WAG-101P12  
ctg4560□ctg2727□ctg6078□WAG-58D20  
ctg4560□ctg2727□ctg6078□WAG-114F18  
ctg4561□ctg2606□ctg2572□WAG-23M1  
ctg4561□ctg2606□ctg2572□WAG-65L11  
ctg4561□ctg2606□ctg2572□WAG-78J3  
ctg4561□ctg2606□ctg2572□WAG-87P6  
ctg4562□ctg2184□□WAG-73C18  
ctg4562□ctg2184□ctg2767□WAG-45E23  
ctg4562□ctg2184□ctg2767□WAG-72I13  
ctg4562□ctg2184□ctg2767□WAG-97O2  
ctg4562□ctg2184□ctg2767□WAG-120G23  
ctg4563□□□WAG-126E17  
ctg4563□ctg2058□□WAG-113J16  
ctg4563□ctg2058□ctg2612□WAG-77P3  
ctg4563□ctg2058□ctg2612□WAG-95B21  
ctg4563□ctg2058□ctg2612□WAG-97M10  
ctg4563□ctg2058□ctg2612□WAG-103A7  
ctg4564□□□WAG-19G7  
ctg4564□□□WAG-69E17  
ctg4564□ctg1676□□WAG-120N23  
ctg4564□ctg1676□ctg1531□WAG-72P18  
ctg4564□ctg1676□ctg1531□WAG-81E1  
ctg4564□ctg1676□ctg1531□WAG-84N5  
ctg4564□ctg1676□ctg1531□WAG-123H8  
ctg4564□ctg1676□ctg1776□WAG-37B19  
ctg4564□ctg1676□ctg1776□WAG-46I14  
ctg4564□ctg1676□ctg1776□WAG-96H3  
ctg4564□ctg1676□ctg1776□WAG-96M14  
ctg4565□□□WAG-54I1  
ctg4565□□□WAG-75M18  
ctg4565□ctg1656□□WAG-20M3  
ctg4565□ctg1656□□WAG-52I18  
ctg4565□ctg1656□□WAG-100P2  
ctg4565□ctg1656□ctg2517□WAG-11F11  
ctg4565□ctg1656□ctg2517□WAG-76A13  
ctg4565□ctg1656□ctg2517□WAG-105M6  
ctg4565□ctg1656□ctg3931□WAG-16G6  
ctg4565□ctg1656□ctg3931□WAG-43A6  
ctg4565□ctg1656□ctg3931□WAG-45E5

ctg4565□ctg1656□ctg3931□WAG-67E10  
ctg4565□ctg1656□ctg3931□WAG-97G3  
ctg4565□ctg1656□ctg5136□WAG-49C6  
ctg4565□ctg1656□ctg5136□WAG-70P20  
ctg4566□□□WAG-54B17  
ctg4566□ctg1227□ctg1315□WAG-40F9  
ctg4566□ctg1227□ctg1315□WAG-54P24  
ctg4566□ctg1227□ctg1315□WAG-65G7  
ctg4566□ctg1227□ctg1315□WAG-87G24  
ctg4566□ctg1227□ctg1315□WAG-102E17  
ctg4566□ctg1227□ctg1315□WAG-103P21  
ctg4566□ctg1227□ctg1315□WAG-124D1  
ctg4567□□□WAG-110A24  
ctg4567□ctg1197□□WAG-20F8  
ctg4567□ctg1197□ctg1042□WAG-16B5  
ctg4567□ctg1197□ctg1042□WAG-100C11  
ctg4567□ctg1197□ctg1042□WAG-101N1  
ctg4567□ctg1197□ctg1042□WAG-112M16  
ctg4567□ctg1337□ctg1185□WAG-26L9  
ctg4567□ctg1337□ctg1185□WAG-49H8  
ctg4567□ctg1337□ctg1185□WAG-58D2  
ctg4567□ctg1337□ctg1185□WAG-76O10  
ctg4567□ctg1337□ctg1185□WAG-87A4  
ctg4567□ctg2056□ctg2498□WAG-21K1  
ctg4567□ctg2056□ctg2498□WAG-47M22  
ctg4567□ctg2056□ctg2498□WAG-62B17  
ctg4567□ctg2056□ctg2498□WAG-110K24  
ctg4567□ctg2056□ctg3472□WAG-95N10  
ctg4567□ctg2056□ctg3472□WAG-98O11  
ctg4567□ctg2056□ctg3472□WAG-129F19  
ctg4568□□□WAG-66E11  
ctg4568□□□WAG-101D20  
ctg4568□ctg681□□WAG-43F16  
ctg4568□ctg681□□WAG-56F3  
ctg4568□ctg681□□WAG-73I19  
ctg4568□ctg681□□WAG-105H4  
ctg4568□ctg681□ctg696□WAG-9H23  
ctg4568□ctg681□ctg696□WAG-18I6  
ctg4568□ctg681□ctg696□WAG-19F4  
ctg4568□ctg681□ctg696□WAG-19G15  
ctg4568□ctg681□ctg696□WAG-71A14  
ctg4568□ctg681□ctg696□WAG-73A19  
ctg4568□ctg681□ctg696□WAG-80H9  
ctg4568□ctg681□ctg696□WAG-83D15  
ctg4568□ctg681□ctg696□WAG-84L9  
ctg4568□ctg681□ctg696□WAG-84P16  
ctg4568□ctg681□ctg696□WAG-87A10  
ctg4568□ctg681□ctg696□WAG-102P5  
ctg4568□ctg681□ctg696□WAG-109C21  
ctg4568□ctg681□ctg696□WAG-112O1  
ctg4568□ctg681□ctg696□WAG-122N20  
ctg4568□ctg681□ctg696□WAG-122P4  
ctg4568□ctg681□ctg696□WAG-125D10  
ctg4568□ctg681□ctg696□WAG-125M10  
ctg4568□ctg681□ctg696□WAG-126J16  
ctg4568□ctg681□ctg696□WAG-127H13

ctg4569□□□WAG-77D14  
ctg4569□ctg484□□WAG-13B14  
ctg4569□ctg484□□WAG-100A12  
ctg4569□ctg484□□WAG-127C13  
ctg4569□ctg484□ctg1557□WAG-16N18  
ctg4569□ctg484□ctg1557□WAG-41J8  
ctg4569□ctg484□ctg1557□WAG-50P16  
ctg4569□ctg484□ctg1557□WAG-54P13  
ctg4569□ctg484□ctg1557□WAG-87K20  
ctg4569□ctg484□ctg1557□WAG-97C14  
ctg4569□ctg484□ctg1557□WAG-101G21  
ctg4569□ctg484□ctg1557□WAG-106M17  
ctg4569□ctg484□ctg2999□WAG-59N3  
ctg4569□ctg484□ctg2999□WAG-64J23  
ctg4569□ctg484□ctg2999□WAG-69D10  
ctg4569□ctg484□ctg392□WAG-10L22  
ctg4569□ctg484□ctg392□WAG-34D12  
ctg4569□ctg484□ctg392□WAG-39G17  
ctg4569□ctg484□ctg392□WAG-49K16  
ctg4569□ctg484□ctg392□WAG-91H14  
ctg4569□ctg484□ctg392□WAG-104D15  
ctg4569□ctg484□ctg392□WAG-120I20  
ctg4569□ctg484□ctg392□WAG-121B3  
ctg4569□ctg484□ctg4368□WAG-28O2  
ctg4569□ctg484□ctg4368□WAG-85P7  
ctg4569□ctg484□ctg5144□WAG-82L14  
ctg4569□ctg484□ctg5144□WAG-97K6  
ctg4569□ctg484□ctg6617□WAG-42B9  
ctg4569□ctg484□ctg6617□WAG-100M1  
ctg4569□ctg6090□□WAG-37K24  
ctg4569□ctg6090□□WAG-81K17  
ctg457□ctg1245□□WAG-75H18  
ctg457□ctg1245□□WAG-124M4  
ctg457□ctg1245□ctg1754□WAG-34B8  
ctg457□ctg1245□ctg1754□WAG-37A16  
ctg457□ctg1245□ctg1754□WAG-70K17  
ctg457□ctg1245□ctg1754□WAG-84C13  
ctg457□ctg1245□ctg1754□WAG-117P18  
ctg457□ctg1245□ctg4497□WAG-19O5  
ctg457□ctg1245□ctg4497□WAG-43E14  
ctg457□ctg1245□ctg5417□WAG-38B20  
ctg457□ctg1245□ctg5417□WAG-62C1  
ctg4570□□□WAG-2K20  
ctg4570□□□WAG-88G12  
ctg4570□ctg1237□ctg1075□WAG-51L19  
ctg4570□ctg1237□ctg1075□WAG-84B11  
ctg4570□ctg1237□ctg1075□WAG-114N3  
ctg4570□ctg1237□ctg1075□WAG-117M14  
ctg4570□ctg1237□ctg1075□WAG-118I11  
ctg4570□ctg495□ctg549□WAG-I17  
ctg4570□ctg495□ctg549□WAG-M17  
ctg4570□ctg495□ctg549□WAG-29J5  
ctg4570□ctg495□ctg549□WAG-40L24  
ctg4570□ctg495□ctg549□WAG-43B14  
ctg4570□ctg495□ctg549□WAG-53N20  
ctg4570□ctg495□ctg549□WAG-77N18

ctg4570□ctg495□ctg549□WAG-89I19  
ctg4570□ctg495□ctg549□WAG-105I2  
ctg4571□□□WAG-63K3  
ctg4571□□□WAG-66J9  
ctg4571□ctg16□□WAG-5D20  
ctg4571□ctg16□ctg1154□WAG-25D11  
ctg4571□ctg16□ctg1154□WAG-53E3  
ctg4571□ctg16□ctg1154□WAG-54H19  
ctg4571□ctg16□ctg1154□WAG-67K4  
ctg4571□ctg16□ctg1154□WAG-76I2  
ctg4571□ctg16□ctg1154□WAG-109L21  
ctg4571□ctg16□ctg4021□WAG-38F7  
ctg4571□ctg16□ctg4021□WAG-51G20  
ctg4571□ctg16□ctg4021□WAG-98K22  
ctg4571□ctg16□ctg4021□WAG-120E4  
ctg4571□ctg3477□ctg3598□WAG-28F5  
ctg4571□ctg3477□ctg3598□WAG-40N16  
ctg4571□ctg3477□ctg3598□WAG-102N22  
ctg4571□ctg6604□□WAG-42I6  
ctg4571□ctg6604□□WAG-67D24  
ctg4571□ctg6604□□WAG-97L12  
ctg4571□ctg6604□ctg42□WAG-10D12  
ctg4571□ctg6604□ctg42□WAG-10M11  
ctg4571□ctg6604□ctg42□WAG-12N2  
ctg4571□ctg6604□ctg42□WAG-13G10  
ctg4571□ctg6604□ctg42□WAG-15L11  
ctg4571□ctg6604□ctg42□WAG-16M1  
ctg4571□ctg6604□ctg42□WAG-17P14  
ctg4571□ctg6604□ctg42□WAG-25M17  
ctg4571□ctg6604□ctg42□WAG-30L3  
ctg4571□ctg6604□ctg42□WAG-30P12  
ctg4571□ctg6604□ctg42□WAG-40B11  
ctg4571□ctg6604□ctg42□WAG-41K9  
ctg4571□ctg6604□ctg42□WAG-46P13  
ctg4571□ctg6604□ctg42□WAG-47N2  
ctg4571□ctg6604□ctg42□WAG-52G20  
ctg4571□ctg6604□ctg42□WAG-54I12  
ctg4571□ctg6604□ctg42□WAG-65E7  
ctg4571□ctg6604□ctg42□WAG-67D3  
ctg4571□ctg6604□ctg42□WAG-70I5  
ctg4571□ctg6604□ctg42□WAG-72H9  
ctg4571□ctg6604□ctg42□WAG-73D21  
ctg4571□ctg6604□ctg42□WAG-74K18  
ctg4571□ctg6604□ctg42□WAG-78B23  
ctg4571□ctg6604□ctg42□WAG-80G8  
ctg4571□ctg6604□ctg42□WAG-84H4  
ctg4571□ctg6604□ctg42□WAG-85H24  
ctg4571□ctg6604□ctg42□WAG-92L21  
ctg4571□ctg6604□ctg42□WAG-92P17  
ctg4571□ctg6604□ctg42□WAG-96I20  
ctg4571□ctg6604□ctg42□WAG-97A17  
ctg4571□ctg6604□ctg42□WAG-100E13  
ctg4571□ctg6604□ctg42□WAG-102E11  
ctg4571□ctg6604□ctg42□WAG-105F17  
ctg4571□ctg6604□ctg42□WAG-105J2  
ctg4571□ctg6604□ctg42□WAG-106I5

ctg4571□ctg6604□ctg42□WAG-113L6  
ctg4571□ctg6604□ctg42□WAG-116H14  
ctg4571□ctg6604□ctg42□WAG-116K7  
ctg4571□ctg6604□ctg42□WAG-120F1  
ctg4571□ctg6604□ctg42□WAG-120P4  
ctg4571□ctg6604□ctg42□WAG-124E13  
ctg4571□ctg6604□ctg42□WAG-124P10  
ctg4571□ctg6604□ctg42□WAG-128G9  
ctg4572□ctg2261□ctg2163□WAG-59O13  
ctg4572□ctg2261□ctg2163□WAG-79H19  
ctg4572□ctg2261□ctg2163□WAG-100C20  
ctg4572□ctg2261□ctg2163□WAG-114L22  
ctg4573□ctg2517□ctg2445□WAG-25I3  
ctg4573□ctg2517□ctg2445□WAG-38H15  
ctg4573□ctg2517□ctg2445□WAG-114O9  
ctg4573□ctg3307□□WAG-46P8  
ctg4573□ctg3307□□WAG-64O1  
ctg4573□ctg3307□ctg3368□WAG-1G4  
ctg4573□ctg3307□ctg3368□WAG-31J1  
ctg4573□ctg3307□ctg3368□WAG-108M12  
ctg4573□ctg3307□ctg5784□WAG-54N13  
ctg4573□ctg3307□ctg5784□WAG-119C14  
ctg4574□□□WAG-90H12  
ctg4574□ctg2836□□WAG-15A20  
ctg4574□ctg2836□□WAG-97F1  
ctg4574□ctg2836□ctg4793□WAG-57N1  
ctg4574□ctg2836□ctg4793□WAG-65I12  
ctg4575□ctg6546□□WAG-45D3  
ctg4575□ctg6546□□WAG-98H21  
ctg4576□□□WAG-52K1  
ctg4576□□□WAG-105K10  
ctg4577□□□WAG-19H24  
ctg4577□□□WAG-24C1  
ctg4578□ctg6313□□WAG-48B1  
ctg4578□ctg6313□□WAG-84E3  
ctg4579□ctg6157□□WAG-9N21  
ctg4579□ctg6157□□WAG-110G12  
ctg458□□□WAG-4N5  
ctg458□ctg1867□□WAG-13M19  
ctg458□ctg1867□□WAG-71A8  
ctg458□ctg1867□□WAG-88K6  
ctg458□ctg1867□ctg2184□WAG-20F2  
ctg458□ctg1867□ctg2184□WAG-45I22  
ctg458□ctg1867□ctg2184□WAG-52F16  
ctg458□ctg1867□ctg2184□WAG-80O24  
ctg458□ctg1867□ctg5502□WAG-97K4  
ctg458□ctg1867□ctg5502□WAG-98P9  
ctg458□ctg2046□ctg1907□WAG-28D2  
ctg458□ctg2046□ctg1907□WAG-48N20  
ctg458□ctg2046□ctg1907□WAG-81A9  
ctg458□ctg2046□ctg1907□WAG-84K24  
ctg458□ctg2046□ctg1907□WAG-87B20  
ctg458□ctg2046□ctg1907□WAG-89D17  
ctg458□ctg2046□ctg1907□WAG-112L9  
ctg458□ctg2046□ctg1907□WAG-123K24  
ctg458□ctg2404□ctg2301□WAG-1P14



ctg458□ctg2404□ctg2301□WAG-33J7  
ctg458□ctg2404□ctg2301□WAG-40M17  
ctg458□ctg2404□ctg2301□WAG-55I4  
ctg458□ctg2404□ctg2301□WAG-55M13  
ctg4580□ctg5799□□WAG-51B7  
ctg4580□ctg5799□□WAG-101G2  
ctg4581□ctg5774□□WAG-17F19  
ctg4581□ctg5774□□WAG-48D14  
ctg4582□ctg5527□ctg6658□WAG-35B14  
ctg4582□ctg5527□ctg6658□WAG-39A16  
ctg4583□ctg5488□ctg6579□WAG-23N6  
ctg4583□ctg5488□ctg6579□WAG-35E21  
ctg4584□ctg5463□ctg6525□WAG-3B4  
ctg4584□ctg5463□ctg6525□WAG-3H5  
ctg4585□ctg5302□ctg6148□WAG-1K10  
ctg4585□ctg5302□ctg6148□WAG-1P7  
ctg4586□ctg5094□ctg5673□WAG-63A4  
ctg4586□ctg5094□ctg5673□WAG-115G4  
ctg4587□ctg5005□ctg5470□WAG-29E7  
ctg4587□ctg5005□ctg5470□WAG-79E19  
ctg4588□□□WAG-44H12  
ctg4588□□□WAG-77M10  
ctg4588□□□WAG-84P14  
ctg4589□□□WAG-52P8  
ctg4589□□□WAG-55G15  
ctg4589□ctg6251□□WAG-49N10  
ctg4589□ctg6251□□WAG-121P17  
ctg459□□□WAG-26J23  
ctg459□ctg1744□□WAG-19F18  
ctg459□ctg1744□□WAG-42O5  
ctg459□ctg1744□□WAG-71D20  
ctg459□ctg1744□□WAG-73G8  
ctg459□ctg1744□□WAG-107G3  
ctg459□ctg1744□ctg2052□WAG-21A3  
ctg459□ctg1744□ctg2052□WAG-64N4  
ctg459□ctg1744□ctg2052□WAG-69F16  
ctg459□ctg1744□ctg2052□WAG-92F7  
ctg459□ctg1744□ctg2052□WAG-102N21  
ctg459□ctg1744□ctg2052□WAG-124D23  
ctg4590□ctg4610□ctg4777□WAG-32F8  
ctg4590□ctg4610□ctg4777□WAG-37B5  
ctg4591□□□WAG-1I17  
ctg4591□□□WAG-106E24  
ctg4591□ctg5519□ctg6639□WAG-29D22  
ctg4591□ctg5519□ctg6639□WAG-61O1  
ctg4592□ctg3963□ctg4339□WAG-57G2  
ctg4592□ctg3963□ctg4339□WAG-80N15  
ctg4592□ctg3963□ctg4339□WAG-83F16  
ctg4593□□□WAG-130O13  
ctg4593□ctg4822□ctg5093□WAG-83F14  
ctg4593□ctg4822□ctg5093□WAG-110J17  
ctg4594□ctg3925□ctg4204□WAG-9M17  
ctg4594□ctg3925□ctg4204□WAG-30I15  
ctg4594□ctg3925□ctg4204□WAG-122G8  
ctg4595□ctg3733□□WAG-74M10  
ctg4595□ctg3733□ctg5170□WAG-22F3

ctg4595□ctg3733□ctg5170□WAG-42M15  
ctg4596□□□WAG-15G9  
ctg4596□□□WAG-110K22  
ctg4596□ctg4501□ctg4633□WAG-43D10  
ctg4596□ctg4501□ctg4633□WAG-61M6  
ctg4597□ctg3597□□WAG-111D5  
ctg4597□ctg3597□ctg4636□WAG-50J3  
ctg4597□ctg3597□ctg4636□WAG-66K10  
ctg4598□ctg3585□ctg3756□WAG-45N24  
ctg4598□ctg3585□ctg3756□WAG-58K14  
ctg4598□ctg3585□ctg3756□WAG-94G16  
ctg4599□ctg3556□□WAG-88A5  
ctg4599□ctg3556□□WAG-99C21  
ctg4599□ctg3556□□WAG-105I24  
ctg4599□ctg3556□□WAG-110A1  
ctg4599□ctg3556□ctg5575□WAG-6M6  
ctg4599□ctg3556□ctg5575□WAG-95C4  
ctg46□□□WAG-64H4  
ctg46□□□WAG-74F6  
ctg46□□□WAG-80M9  
ctg46□□□WAG-111K3  
ctg46□□□WAG-120H16  
ctg46□ctg1070□□WAG-9C22  
ctg46□ctg1070□□WAG-80C7  
ctg46□ctg1070□□WAG-100E7  
ctg46□ctg1070□□WAG-129O1  
ctg46□ctg1070□ctg1458□WAG-20A24  
ctg46□ctg1070□ctg1458□WAG-20L12  
ctg46□ctg1070□ctg1458□WAG-37C19  
ctg46□ctg1070□ctg1458□WAG-38F20  
ctg46□ctg1070□ctg1458□WAG-55P22  
ctg46□ctg1070□ctg1458□WAG-89M12  
ctg46□ctg1070□ctg1458□WAG-111P12  
ctg46□ctg1070□ctg1458□WAG-129O16  
ctg46□ctg1070□ctg3295□WAG-83I15  
ctg46□ctg1070□ctg3295□WAG-101I6  
ctg46□ctg1070□ctg3295□WAG-112N18  
ctg46□ctg1070□ctg6182□WAG-21M2  
ctg46□ctg1070□ctg6182□WAG-70D1  
ctg46□ctg1740□□WAG-98J20  
ctg46□ctg1740□□WAG-101M22  
ctg46□ctg1740□ctg2371□WAG-3D22  
ctg46□ctg1740□ctg2371□WAG-31N11  
ctg46□ctg1740□ctg2371□WAG-34G5  
ctg46□ctg1740□ctg2371□WAG-54K1  
ctg46□ctg1740□ctg2371□WAG-73F22  
ctg46□ctg1740□ctg2371□WAG-82N16  
ctg46□ctg1740□ctg2371□WAG-88F12  
ctg46□ctg1740□ctg2371□WAG-99P10  
ctg46□ctg1740□ctg3201□WAG-71P10  
ctg46□ctg1740□ctg3201□WAG-86L14  
ctg46□ctg1740□ctg3201□WAG-112F8  
ctg46□ctg1740□ctg3201□WAG-127F12  
ctg460□ctg1655□ctg2003□WAG-20A2  
ctg460□ctg1655□ctg2003□WAG-29L17  
ctg460□ctg1655□ctg2003□WAG-44L10

ctg460□ctg1655□ctg2003□WAG-66I9  
ctg460□ctg1655□ctg2003□WAG-74M1  
ctg460□ctg1655□ctg2003□WAG-90D4  
ctg460□ctg1655□ctg2003□WAG-90P17  
ctg460□ctg1655□ctg2003□WAG-92F19  
ctg460□ctg1655□ctg2003□WAG-97O11  
ctg4600□ctg3331□□WAG-36K23  
ctg4600□ctg3331□ctg4268□WAG-35J12  
ctg4600□ctg3331□ctg4268□WAG-54M10  
ctg4600□ctg3331□ctg4268□WAG-117M9  
ctg4601□ctg3083□□WAG-107K14  
ctg4601□ctg3083□ctg4057□WAG-51H23  
ctg4601□ctg3083□ctg4057□WAG-89N13  
ctg4602□ctg3055□□WAG-96M23  
ctg4602□ctg3055□ctg4014□WAG-37O15  
ctg4602□ctg3055□ctg4014□WAG-105O12  
ctg4603□ctg3000□□WAG-6P13  
ctg4603□ctg3000□ctg4092□WAG-30L5  
ctg4603□ctg3000□ctg4092□WAG-64M14  
ctg4604□ctg2991□ctg3593□WAG-74P15  
ctg4604□ctg2991□ctg3593□WAG-84K19  
ctg4604□ctg2991□ctg3593□WAG-122F17  
ctg4604□ctg2991□ctg6942□WAG-17N19  
ctg4604□ctg2991□ctg6942□WAG-84M7  
ctg4605□ctg2913□ctg2892□WAG-52D5  
ctg4605□ctg2913□ctg2892□WAG-59H23  
ctg4605□ctg2913□ctg2892□WAG-67A15  
ctg4606□ctg2792□ctg3788□WAG-31O1  
ctg4606□ctg2792□ctg3788□WAG-32M11  
ctg4606□ctg2792□ctg3788□WAG-79J21  
ctg4606□ctg2792□ctg3788□WAG-106G18  
ctg4607□□□WAG-46B22  
ctg4607□□□WAG-122H13  
ctg4607□ctg2598□ctg3389□WAG-22F9  
ctg4607□ctg2598□ctg3389□WAG-63O2  
ctg4607□ctg2598□ctg3389□WAG-98I24  
ctg4607□ctg2598□ctg5571□WAG-54E24  
ctg4607□ctg2598□ctg5571□WAG-125O24  
ctg4608□ctg2904□□WAG-93O12  
ctg4608□ctg2904□ctg4247□WAG-29N3  
ctg4608□ctg2904□ctg4247□WAG-126D20  
ctg4608□ctg2904□ctg4672□WAG-102P13  
ctg4608□ctg2904□ctg4672□WAG-104D11  
ctg4608□ctg2904□ctg6151□WAG-18P2  
ctg4608□ctg2904□ctg6151□WAG-116K14  
ctg4609□ctg2576□ctg2534□WAG-8H14  
ctg4609□ctg2576□ctg2534□WAG-20M20  
ctg4609□ctg2576□ctg2534□WAG-59D2  
ctg4609□ctg2576□ctg2534□WAG-119O14  
ctg461□□□WAG-74M16  
ctg461□□□WAG-125B19  
ctg461□ctg1466□□WAG-30B9  
ctg461□ctg1466□ctg1727□WAG-22O22  
ctg461□ctg1466□ctg1727□WAG-31L14  
ctg461□ctg1466□ctg1727□WAG-43O21  
ctg461□ctg1466□ctg1727□WAG-53G8

ctg461□ctg1813□ctg1639□WAG-74E1  
ctg461□ctg1813□ctg1639□WAG-76B3  
ctg461□ctg1813□ctg1639□WAG-86C7  
ctg461□ctg1813□ctg1639□WAG-110C15  
ctg4610□ctg2062□ctg2932□WAG-71F24  
ctg4610□ctg2062□ctg2932□WAG-92G9  
ctg4610□ctg2062□ctg2932□WAG-101F19  
ctg4610□ctg2062□ctg3311□WAG-39L16  
ctg4610□ctg2062□ctg3311□WAG-44G12  
ctg4610□ctg2062□ctg3311□WAG-66N7  
ctg4611□ctg1848□ctg1677□WAG-52C10  
ctg4611□ctg1848□ctg1677□WAG-91L7  
ctg4611□ctg1848□ctg1677□WAG-102E18  
ctg4611□ctg1848□ctg1677□WAG-127E3  
ctg4612□□□WAG-76F19  
ctg4612□□□WAG-129J5  
ctg4612□ctg1875□ctg2222□WAG-17O4  
ctg4612□ctg1875□ctg2222□WAG-20K4  
ctg4612□ctg1875□ctg2222□WAG-35H11  
ctg4612□ctg1875□ctg2222□WAG-39E19  
ctg4612□ctg1875□ctg2222□WAG-100A5  
ctg4612□ctg1875□ctg2222□WAG-117M21  
ctg4612□ctg1875□ctg2222□WAG-128J14  
ctg4613□□□WAG-7P4  
ctg4613□ctg2156□ctg2034□WAG-49I13  
ctg4613□ctg2156□ctg2034□WAG-103B9  
ctg4613□ctg2156□ctg2034□WAG-124E1  
ctg4613□ctg2156□ctg2034□WAG-127C19  
ctg4614□ctg1738□□WAG-57O19  
ctg4614□ctg1738□ctg1583□WAG-17K14  
ctg4614□ctg1738□ctg1583□WAG-23K8  
ctg4614□ctg1738□ctg1583□WAG-107B1  
ctg4614□ctg1738□ctg1583□WAG-115C19  
ctg4615□ctg1658□□WAG-6I18  
ctg4615□ctg1658□□WAG-121J24  
ctg4615□ctg1658□ctg2625□WAG-12H2  
ctg4615□ctg1658□ctg2625□WAG-23B19  
ctg4615□ctg1658□ctg2625□WAG-74H14  
ctg4615□ctg1658□ctg2625□WAG-111O8  
ctg4615□ctg1658□ctg6380□WAG-8A10  
ctg4615□ctg1658□ctg6380□WAG-96L18  
ctg4616□□□WAG-105B3  
ctg4616□ctg1988□□WAG-51J10  
ctg4616□ctg1988□ctg2505□WAG-3E15  
ctg4616□ctg1988□ctg2505□WAG-58M16  
ctg4616□ctg1988□ctg2505□WAG-92C16  
ctg4616□ctg1988□ctg2505□WAG-100N11  
ctg4616□ctg3749□ctg3980□WAG-13C10  
ctg4616□ctg3749□ctg3980□WAG-25G14  
ctg4616□ctg3749□ctg3980□WAG-77D19  
ctg4617□□□WAG-J3  
ctg4617□□□WAG-102C7  
ctg4617□□□WAG-110O14  
ctg4617□ctg1424□□WAG-5F1  
ctg4617□ctg1424□□WAG-23K3  
ctg4617□ctg1424□□WAG-62L17

ctg4617□ctg1424□□WAG-71G19  
ctg4617□ctg1424□ctg2082□WAG-24A22  
ctg4617□ctg1424□ctg2082□WAG-26B8  
ctg4617□ctg1424□ctg2082□WAG-86J6  
ctg4617□ctg1424□ctg2082□WAG-86K22  
ctg4617□ctg1424□ctg2082□WAG-87L14  
ctg4617□ctg1424□ctg2082□WAG-92F4  
ctg4617□ctg1424□ctg2082□WAG-92H14  
ctg4618□ctg1615□ctg1469□WAG-13F22  
ctg4618□ctg1615□ctg1469□WAG-29I14  
ctg4618□ctg1615□ctg1469□WAG-32E11  
ctg4618□ctg1615□ctg1469□WAG-64F19  
ctg4619□□□WAG-123M4  
ctg4619□ctg2486□□WAG-23B8  
ctg4619□ctg2486□□WAG-124M18  
ctg4619□ctg2486□□WAG-127N2  
ctg4619□ctg2486□ctg2427□WAG-14N13  
ctg4619□ctg2486□ctg2427□WAG-45H21  
ctg4619□ctg2486□ctg2427□WAG-54G14  
ctg4619□ctg2486□ctg2427□WAG-57K22  
ctg4619□ctg2486□ctg2427□WAG-93B8  
ctg4619□ctg2486□ctg2427□WAG-105M4  
ctg4619□ctg2486□ctg5259□WAG-29E20  
ctg4619□ctg2486□ctg5259□WAG-59N11  
ctg4619□ctg2486□ctg5532□WAG-8M8  
ctg4619□ctg2486□ctg5532□WAG-125L14  
ctg4619□ctg2486□ctg5749□WAG-84L8  
ctg4619□ctg2486□ctg5749□WAG-124C9  
ctg4619□ctg2486□ctg5828□WAG-85F7  
ctg4619□ctg2486□ctg5828□WAG-99O23  
ctg462□□□WAG-117O8  
ctg462□ctg1551□□WAG-91H4  
ctg462□ctg1551□ctg1398□WAG-22F14  
ctg462□ctg1551□ctg1398□WAG-107K15  
ctg462□ctg1551□ctg1398□WAG-126J18  
ctg462□ctg2940□□WAG-47L14  
ctg462□ctg2940□ctg3829□WAG-65B3  
ctg462□ctg2940□ctg3829□WAG-85M14  
ctg462□ctg2965□□WAG-60C19  
ctg462□ctg2965□ctg3603□WAG-79E4  
ctg462□ctg2965□ctg3603□WAG-98N23  
ctg462□ctg2965□ctg3603□WAG-111A13  
ctg462□ctg2968□ctg2951□WAG-26N7  
ctg462□ctg2968□ctg2951□WAG-88N24  
ctg4620□□□WAG-30A24  
ctg4620□ctg1246□ctg1392□WAG-20L14  
ctg4620□ctg1246□ctg1392□WAG-52K8  
ctg4620□ctg1246□ctg1392□WAG-65J18  
ctg4620□ctg1246□ctg1392□WAG-73A4  
ctg4620□ctg1246□ctg1392□WAG-82K21  
ctg4620□ctg1246□ctg1392□WAG-86L16  
ctg4620□ctg6301□□WAG-60A5  
ctg4620□ctg6301□□WAG-74J16  
ctg4621□□□WAG-37M24  
ctg4621□□□WAG-78F16  
ctg4621□ctg2051□□WAG-78J24

ctg4621□ctg2051□ctg1910□WAG-50F2  
ctg4621□ctg2051□ctg1910□WAG-75F11  
ctg4621□ctg2051□ctg1910□WAG-82L18  
ctg4621□ctg2051□ctg1910□WAG-107M22  
ctg4621□ctg2051□ctg1910□WAG-117D8  
ctg4622□□□WAG-11G10  
ctg4622□ctg1370□ctg1211□WAG-31F14  
ctg4622□ctg1370□ctg1211□WAG-36D23  
ctg4622□ctg1370□ctg1211□WAG-48M4  
ctg4622□ctg1370□ctg1211□WAG-109K9  
ctg4622□ctg1370□ctg1211□WAG-111K9  
ctg4623□ctg741□ctg597□WAG-14H5  
ctg4623□ctg741□ctg597□WAG-31E13  
ctg4623□ctg741□ctg597□WAG-33P16  
ctg4623□ctg741□ctg597□WAG-44B1  
ctg4623□ctg741□ctg597□WAG-106G2  
ctg4623□ctg741□ctg597□WAG-127N23  
ctg4624□ctg731□ctg741□WAG-33G7  
ctg4624□ctg731□ctg741□WAG-44G8  
ctg4624□ctg731□ctg741□WAG-68M3  
ctg4624□ctg731□ctg741□WAG-80P20  
ctg4624□ctg731□ctg741□WAG-83O23  
ctg4624□ctg731□ctg741□WAG-122N2  
ctg4625□ctg5314□ctg6190□WAG-35B15  
ctg4625□ctg5314□ctg6190□WAG-115G9  
ctg4625□ctg535□□WAG-125I7  
ctg4625□ctg535□ctg717□WAG-52P20  
ctg4625□ctg535□ctg717□WAG-63O12  
ctg4625□ctg535□ctg717□WAG-67H11  
ctg4625□ctg535□ctg717□WAG-85G17  
ctg4625□ctg535□ctg717□WAG-106L5  
ctg4625□ctg535□ctg717□WAG-114B5  
ctg4625□ctg535□ctg717□WAG-118I6  
ctg4626□□□WAG-33O19  
ctg4626□ctg538□□WAG-126L22  
ctg4626□ctg538□ctg945□WAG-22J16  
ctg4626□ctg538□ctg945□WAG-33J3  
ctg4626□ctg538□ctg945□WAG-57M2  
ctg4626□ctg538□ctg945□WAG-61E23  
ctg4626□ctg538□ctg945□WAG-81K5  
ctg4626□ctg538□ctg945□WAG-84E1  
ctg4626□ctg538□ctg945□WAG-92B15  
ctg4626□ctg538□ctg945□WAG-95P13  
ctg4626□ctg538□ctg945□WAG-107D4  
ctg4626□ctg538□ctg945□WAG-114P13  
ctg4627□□□WAG-21K13  
ctg4627□ctg472□□WAG-117J6  
ctg4627□ctg472□ctg492□WAG-40K15  
ctg4627□ctg472□ctg492□WAG-56E5  
ctg4627□ctg472□ctg492□WAG-59P2  
ctg4627□ctg472□ctg492□WAG-61N15  
ctg4627□ctg472□ctg492□WAG-62J18  
ctg4627□ctg472□ctg492□WAG-76I9  
ctg4627□ctg472□ctg492□WAG-100M2  
ctg4627□ctg472□ctg492□WAG-130H2  
ctg4628□ctg2869□□WAG-123K8

ctg4628□ctg2869□ctg2865□WAG-8N16  
ctg4628□ctg2869□ctg2865□WAG-31A14  
ctg4628□ctg2869□ctg2865□WAG-44I12  
ctg4628□ctg2869□ctg2865□WAG-49J1  
ctg4628□ctg308□□WAG-3J10  
ctg4628□ctg308□ctg236□WAG-5A9  
ctg4628□ctg308□ctg236□WAG-17K13  
ctg4628□ctg308□ctg236□WAG-22N3  
ctg4628□ctg308□ctg236□WAG-28E18  
ctg4628□ctg308□ctg236□WAG-69L11  
ctg4628□ctg308□ctg236□WAG-76J4  
ctg4628□ctg308□ctg236□WAG-76P17  
ctg4628□ctg308□ctg236□WAG-79L13  
ctg4628□ctg308□ctg236□WAG-98H24  
ctg4628□ctg308□ctg236□WAG-129P23  
ctg4629□□□WAG-6I19  
ctg4629□□□WAG-77O22  
ctg4629□□□WAG-97O24  
ctg4629□ctg177□□WAG-47B2  
ctg4629□ctg177□□WAG-62A14  
ctg4629□ctg177□ctg148□WAG-15G11  
ctg4629□ctg177□ctg148□WAG-22D21  
ctg4629□ctg177□ctg148□WAG-30D8  
ctg4629□ctg177□ctg148□WAG-39P22  
ctg4629□ctg177□ctg148□WAG-44A13  
ctg4629□ctg177□ctg148□WAG-45I23  
ctg4629□ctg177□ctg148□WAG-46O7  
ctg4629□ctg177□ctg148□WAG-48P7  
ctg4629□ctg177□ctg148□WAG-54K14  
ctg4629□ctg177□ctg148□WAG-64J13  
ctg4629□ctg177□ctg148□WAG-65L21  
ctg4629□ctg177□ctg148□WAG-72F17  
ctg4629□ctg177□ctg148□WAG-74A20  
ctg4629□ctg177□ctg148□WAG-79P11  
ctg4629□ctg177□ctg148□WAG-85B19  
ctg4629□ctg177□ctg148□WAG-91F7  
ctg4629□ctg177□ctg148□WAG-93J10  
ctg4629□ctg177□ctg148□WAG-97M18  
ctg4629□ctg177□ctg148□WAG-97O13  
ctg4629□ctg177□ctg148□WAG-98A4  
ctg4629□ctg177□ctg148□WAG-114M8  
ctg4629□ctg177□ctg148□WAG-122O6  
ctg4629□ctg177□ctg396□WAG-45F7  
ctg4629□ctg177□ctg396□WAG-70N20  
ctg4629□ctg177□ctg396□WAG-73G10  
ctg4629□ctg177□ctg396□WAG-106A18  
ctg4629□ctg177□ctg396□WAG-109M19  
ctg4629□ctg392□ctg345□WAG-16D10  
ctg4629□ctg392□ctg345□WAG-18C8  
ctg4629□ctg392□ctg345□WAG-24D24  
ctg4629□ctg392□ctg345□WAG-28E16  
ctg4629□ctg392□ctg345□WAG-32P9  
ctg4629□ctg392□ctg345□WAG-33I24  
ctg4629□ctg392□ctg345□WAG-34F3  
ctg4629□ctg392□ctg345□WAG-36L14  
ctg4629□ctg392□ctg345□WAG-47H18

ctg4629□ctg392□ctg345□WAG-49O15  
ctg4629□ctg392□ctg345□WAG-51J1  
ctg4629□ctg392□ctg345□WAG-71G12  
ctg4629□ctg392□ctg345□WAG-71P12  
ctg4629□ctg392□ctg345□WAG-87K16  
ctg4629□ctg392□ctg345□WAG-92B10  
ctg4629□ctg392□ctg345□WAG-98C4  
ctg4629□ctg392□ctg345□WAG-106J22  
ctg4629□ctg392□ctg345□WAG-123M13  
ctg4629□ctg392□ctg345□WAG-124E2  
ctg463□□□WAG-95K9  
ctg463□ctg1300□□WAG-12N20  
ctg463□ctg1300□□WAG-61L10  
ctg463□ctg1300□ctg3220□WAG-80E11  
ctg463□ctg1300□ctg3220□WAG-92P9  
ctg463□ctg1300□ctg3220□WAG-97B14  
ctg463□ctg1300□ctg3220□WAG-97P19  
ctg463□ctg1300□ctg5551□WAG-49A10  
ctg463□ctg1300□ctg5551□WAG-82G10  
ctg463□ctg1300□ctg6470□WAG-68G11  
ctg463□ctg1300□ctg6470□WAG-81G22  
ctg463□ctg3905□ctg4183□WAG-28I6  
ctg463□ctg3905□ctg4183□WAG-35B10  
ctg463□ctg3905□ctg4183□WAG-123L20  
ctg4630□ctg14□□WAG-6N16  
ctg4630□ctg14□□WAG-48P6  
ctg4630□ctg14□ctg139□WAG-35J18  
ctg4630□ctg14□ctg139□WAG-36G15  
ctg4630□ctg14□ctg139□WAG-50O11  
ctg4630□ctg14□ctg139□WAG-94K10  
ctg4630□ctg14□ctg139□WAG-95B3  
ctg4630□ctg14□ctg139□WAG-97L5  
ctg4630□ctg14□ctg139□WAG-98M22  
ctg4630□ctg14□ctg139□WAG-107P9  
ctg4630□ctg14□ctg139□WAG-123L13  
ctg4630□ctg14□ctg139□WAG-124F6  
ctg4630□ctg14□ctg22□WAG-3H15  
ctg4630□ctg14□ctg22□WAG-25G23  
ctg4630□ctg14□ctg22□WAG-41M11  
ctg4630□ctg14□ctg22□WAG-47F7  
ctg4630□ctg14□ctg22□WAG-54N18  
ctg4630□ctg14□ctg22□WAG-58J21  
ctg4630□ctg14□ctg22□WAG-59N17  
ctg4630□ctg14□ctg22□WAG-60P16  
ctg4630□ctg14□ctg22□WAG-63E17  
ctg4630□ctg14□ctg22□WAG-63F17  
ctg4630□ctg14□ctg22□WAG-77F16  
ctg4630□ctg14□ctg22□WAG-86H12  
ctg4630□ctg14□ctg22□WAG-98H10  
ctg4630□ctg14□ctg22□WAG-110P1  
ctg4630□ctg14□ctg22□WAG-114K9  
ctg4630□ctg14□ctg22□WAG-117O19  
ctg4630□ctg14□ctg22□WAG-118F1  
ctg4631□ctg2108□□WAG-41B13  
ctg4631□ctg2108□ctg2683□WAG-28F1  
ctg4631□ctg2108□ctg2683□WAG-80G1



ctg4631□ctg2108□ctg2683□WAG-113G11  
ctg4632□ctg1693□□WAG-53L20  
ctg4632□ctg1693□ctg2146□WAG-29A11  
ctg4632□ctg1693□ctg2146□WAG-63F11  
ctg4632□ctg1693□ctg2146□WAG-86A24  
ctg4632□ctg1693□ctg2146□WAG-106G23  
ctg4632□ctg1693□ctg2146□WAG-115E20  
ctg4632□ctg1693□ctg3354□WAG-26O5  
ctg4632□ctg1693□ctg3354□WAG-56M15  
ctg4632□ctg1693□ctg3354□WAG-58L21  
ctg4632□ctg1693□ctg3354□WAG-129E4  
ctg4633□□□WAG-35F4  
ctg4633□□□WAG-65D24  
ctg4633□ctg1769□ctg2074□WAG-2D10  
ctg4633□ctg1769□ctg2074□WAG-18P5  
ctg4633□ctg1769□ctg2074□WAG-60A8  
ctg4633□ctg1769□ctg2074□WAG-62K21  
ctg4633□ctg1769□ctg2074□WAG-85P24  
ctg4633□ctg4698□ctg4870□WAG-103A23  
ctg4633□ctg4698□ctg4870□WAG-103L13  
ctg4634□ctg2810□□WAG-65G17  
ctg4634□ctg2810□ctg3618□WAG-28H14  
ctg4634□ctg2810□ctg3618□WAG-74A1  
ctg4634□ctg2810□ctg3618□WAG-95G7  
ctg4634□ctg2810□ctg3618□WAG-102K4  
ctg4635□□□WAG-119C8  
ctg4635□ctg1009□□WAG-48B22  
ctg4635□ctg1009□□WAG-83H13  
ctg4635□ctg1009□ctg1045□WAG-12K9  
ctg4635□ctg1009□ctg1045□WAG-28G6  
ctg4635□ctg1009□ctg1045□WAG-29L13  
ctg4635□ctg1009□ctg1045□WAG-48D19  
ctg4635□ctg1009□ctg1045□WAG-61I21  
ctg4635□ctg1009□ctg1045□WAG-65E1  
ctg4635□ctg1009□ctg1045□WAG-115L22  
ctg4635□ctg1009□ctg1045□WAG-122D8  
ctg4635□ctg1009□ctg1045□WAG-129O5  
ctg4636□□□WAG-22K21  
ctg4636□□□WAG-56M6  
ctg4636□ctg3032□ctg3961□WAG-11H22  
ctg4636□ctg3032□ctg3961□WAG-126C18  
ctg4636□ctg3032□ctg5628□WAG-13D12  
ctg4636□ctg3032□ctg5628□WAG-20D7  
ctg4636□ctg531□□WAG-96J17  
ctg4636□ctg531□□WAG-123F1  
ctg4636□ctg531□□WAG-128G19  
ctg4636□ctg531□ctg3912□WAG-23I12  
ctg4636□ctg531□ctg3912□WAG-93M17  
ctg4636□ctg531□ctg3912□WAG-120A9  
ctg4636□ctg531□ctg740□WAG-16F20  
ctg4636□ctg531□ctg740□WAG-19K23  
ctg4636□ctg531□ctg740□WAG-52N11  
ctg4636□ctg531□ctg740□WAG-109N12  
ctg4637□ctg2210□ctg2088□WAG-49I15  
ctg4637□ctg2210□ctg2088□WAG-73O13  
ctg4637□ctg2210□ctg2088□WAG-121A16

ctg4637□ctg2210□ctg2088□WAG-127I22  
ctg4638□□□WAG-11N2  
ctg4638□ctg304□ctg285□WAG-3A15  
ctg4638□ctg304□ctg285□WAG-11G1  
ctg4638□ctg304□ctg285□WAG-14H17  
ctg4638□ctg304□ctg285□WAG-41O4  
ctg4638□ctg304□ctg285□WAG-42K14  
ctg4638□ctg304□ctg285□WAG-46N22  
ctg4638□ctg304□ctg285□WAG-48G17  
ctg4638□ctg304□ctg285□WAG-61K13  
ctg4638□ctg304□ctg285□WAG-73D16  
ctg4638□ctg304□ctg285□WAG-81F12  
ctg4638□ctg304□ctg285□WAG-82G7  
ctg4638□ctg304□ctg285□WAG-85J6  
ctg4638□ctg304□ctg285□WAG-87M19  
ctg4638□ctg304□ctg285□WAG-94E11  
ctg4638□ctg304□ctg285□WAG-103J20  
ctg4638□ctg304□ctg285□WAG-105M11  
ctg4638□ctg304□ctg285□WAG-119N17  
ctg4639□ctg3264□□WAG-96P1  
ctg4639□ctg3264□□WAG-114I24  
ctg4639□ctg3264□ctg6172□WAG-50O16  
ctg4639□ctg3264□ctg6172□WAG-83M23  
ctg464□□□WAG-119L13  
ctg464□ctg1460□ctg1310□WAG-24N10  
ctg464□ctg1460□ctg1310□WAG-37M12  
ctg464□ctg1460□ctg1310□WAG-69M23  
ctg464□ctg1460□ctg1310□WAG-116J23  
ctg464□ctg1507□□WAG-35C8  
ctg464□ctg1507□□WAG-42F13  
ctg464□ctg1507□□WAG-106G9  
ctg464□ctg1507□□WAG-110K4  
ctg464□ctg1507□ctg2319□WAG-42E20  
ctg464□ctg1507□ctg2319□WAG-48B10  
ctg464□ctg1507□ctg2319□WAG-80J21  
ctg464□ctg1507□ctg2319□WAG-106I10  
ctg464□ctg1507□ctg2990□WAG-21H5  
ctg464□ctg1507□ctg2990□WAG-92H18  
ctg464□ctg1507□ctg5772□WAG-2M7  
ctg464□ctg1507□ctg5772□WAG-77M11  
ctg464□ctg1507□ctg5948□WAG-6P7  
ctg464□ctg1507□ctg5948□WAG-83B3  
ctg464□ctg3961□ctg4238□WAG-3I16  
ctg464□ctg3961□ctg4238□WAG-9J12  
ctg464□ctg3961□ctg4238□WAG-33E14  
ctg4640□□□WAG-72D11  
ctg4640□ctg3087□ctg3084□WAG-14M10  
ctg4640□ctg3087□ctg3084□WAG-59K4  
ctg4640□ctg3087□ctg3084□WAG-87B6  
ctg4640□ctg40□ctg34□WAG-10M16  
ctg4640□ctg40□ctg34□WAG-30O3  
ctg4640□ctg40□ctg34□WAG-48N13  
ctg4640□ctg40□ctg34□WAG-68I22  
ctg4640□ctg40□ctg34□WAG-72F2  
ctg4640□ctg40□ctg34□WAG-73H3  
ctg4640□ctg40□ctg34□WAG-78C12

ctg4640□ctg40□ctg34□WAG-82A4  
ctg4640□ctg40□ctg34□WAG-84A5  
ctg4640□ctg40□ctg34□WAG-97B11  
ctg4640□ctg40□ctg3543□WAG-84I12  
ctg4640□ctg40□ctg3543□WAG-113E24  
ctg4640□ctg40□ctg3543□WAG-124J10  
ctg4641□□□WAG-38K6  
ctg4641□ctg2159□□WAG-103H3  
ctg4641□ctg2159□ctg3524□WAG-19J4  
ctg4641□ctg2159□ctg3524□WAG-54M22  
ctg4641□ctg2159□ctg3524□WAG-109A23  
ctg4641□ctg2159□ctg3524□WAG-112O4  
ctg4642□ctg5506□ctg6614□WAG-61M9  
ctg4642□ctg5506□ctg6614□WAG-102K1  
ctg4643□□□WAG-101A17  
ctg4643□□□WAG-130G1  
ctg4644□□□WAG-53F9  
ctg4644□□□WAG-85B20  
ctg4644□ctg2189□□WAG-74M17  
ctg4644□ctg2189□ctg2061□WAG-21N1  
ctg4644□ctg2189□ctg2061□WAG-22C12  
ctg4644□ctg2189□ctg2061□WAG-49A9  
ctg4644□ctg2189□ctg2061□WAG-92C21  
ctg4644□ctg2610□□WAG-58P13  
ctg4644□ctg2610□ctg3770□WAG-43K5  
ctg4644□ctg2610□ctg3770□WAG-66L19  
ctg4644□ctg2610□ctg3770□WAG-98N2  
ctg4644□ctg2610□ctg4286□WAG-70K7  
ctg4644□ctg2610□ctg4286□WAG-104P2  
ctg4644□ctg3199□□WAG-84O10  
ctg4644□ctg3199□ctg4222□WAG-47J18  
ctg4644□ctg3199□ctg4222□WAG-109G8  
ctg4644□ctg3199□ctg4222□WAG-109N2  
ctg4644□ctg4520□ctg4652□WAG-50M13  
ctg4644□ctg4520□ctg4652□WAG-56I21  
ctg4644□ctg746□□WAG-53I12  
ctg4644□ctg746□□WAG-128C15  
ctg4644□ctg746□ctg606□WAG-33D14  
ctg4644□ctg746□ctg606□WAG-45D4  
ctg4644□ctg746□ctg606□WAG-62H24  
ctg4644□ctg746□ctg606□WAG-118H7  
ctg4644□ctg746□ctg606□WAG-120P15  
ctg4644□ctg746□ctg606□WAG-122H3  
ctg4645□□□WAG-39L12  
ctg4645□ctg448□□WAG-6K8  
ctg4645□ctg448□ctg460□WAG-55C7  
ctg4645□ctg448□ctg460□WAG-79B14  
ctg4645□ctg448□ctg460□WAG-83C6  
ctg4645□ctg448□ctg460□WAG-89N16  
ctg4645□ctg448□ctg460□WAG-101K13  
ctg4645□ctg448□ctg460□WAG-111G13  
ctg4645□ctg448□ctg460□WAG-130I16  
ctg4645□ctg448□ctg460□WAG-130K13  
ctg4646□ctg175□□WAG-43M19  
ctg4646□ctg175□□WAG-67P18  
ctg4646□ctg175□ctg145□WAG-4O7

ctg4646□ctg175□ctg145□WAG-10I23  
ctg4646□ctg175□ctg145□WAG-20D24  
ctg4646□ctg175□ctg145□WAG-25I4  
ctg4646□ctg175□ctg145□WAG-28D11  
ctg4646□ctg175□ctg145□WAG-28E23  
ctg4646□ctg175□ctg145□WAG-29P15  
ctg4646□ctg175□ctg145□WAG-101C19  
ctg4646□ctg175□ctg145□WAG-124C16  
ctg4647□□□WAG-91D21  
ctg4647□ctg1014□□□WAG-24G4  
ctg4647□ctg1014□□□WAG-71J17  
ctg4647□ctg1014□ctg1115□WAG-35P15  
ctg4647□ctg1014□ctg1115□WAG-76H3  
ctg4647□ctg1014□ctg1115□WAG-97A6  
ctg4647□ctg1014□ctg1115□WAG-102O17  
ctg4647□ctg1014□ctg1115□WAG-130J18  
ctg4647□ctg776□□□WAG-43L6  
ctg4647□ctg776□ctg1425□WAG-69D8  
ctg4647□ctg776□ctg1425□WAG-79A12  
ctg4647□ctg776□ctg1425□WAG-82D16  
ctg4647□ctg776□ctg1425□WAG-83D9  
ctg4647□ctg776□ctg1425□WAG-95O12  
ctg4647□ctg776□ctg1425□WAG-106G16  
ctg4647□ctg776□ctg1425□WAG-107J10  
ctg4647□ctg776□ctg1425□WAG-114A17  
ctg4648□ctg1407□□□WAG-111A22  
ctg4648□ctg1407□ctg1307□WAG-17E1  
ctg4648□ctg1407□ctg1307□WAG-17M13  
ctg4648□ctg1407□ctg1307□WAG-37N15  
ctg4648□ctg1407□ctg1307□WAG-40B8  
ctg4648□ctg1407□ctg1307□WAG-86L18  
ctg4648□ctg1407□ctg1307□WAG-87E19  
ctg4648□ctg1407□ctg1307□WAG-94A2  
ctg4648□ctg1407□ctg1307□WAG-96B2  
ctg4648□ctg1407□ctg1307□WAG-110L17  
ctg4648□ctg1407□ctg1307□WAG-118E24  
ctg4648□ctg1407□ctg1307□WAG-123C14  
ctg4649□□□WAG-2L10  
ctg4649□ctg4519□ctg4651□WAG-67I13  
ctg4649□ctg4519□ctg4651□WAG-110E16  
ctg465□ctg1302□ctg1152□WAG-55C18  
ctg465□ctg1302□ctg1152□WAG-73O19  
ctg465□ctg1302□ctg1152□WAG-83E11  
ctg465□ctg1302□ctg1152□WAG-88D4  
ctg465□ctg1302□ctg1152□WAG-118G7  
ctg465□ctg4878□ctg5181□WAG-24E14  
ctg465□ctg4878□ctg5181□WAG-113O9  
ctg4650□□□WAG-35M16  
ctg4650□□□WAG-69E18  
ctg4650□□□WAG-73O5  
ctg4650□ctg1151□ctg984□WAG-8L13  
ctg4650□ctg1151□ctg984□WAG-17L8  
ctg4650□ctg1151□ctg984□WAG-92O6  
ctg4651□ctg5756□□□WAG-109A15  
ctg4651□ctg5756□□□WAG-109E17  
ctg4652□ctg150□ctg116□WAG-16H13

ctg4652□ctg150□ctg116□WAG-29M7  
ctg4652□ctg150□ctg116□WAG-33J1  
ctg4652□ctg150□ctg116□WAG-66G8  
ctg4652□ctg150□ctg116□WAG-67O12  
ctg4652□ctg150□ctg116□WAG-106D1  
ctg4652□ctg150□ctg116□WAG-108I12  
ctg4652□ctg150□ctg116□WAG-110H19  
ctg4653□ctg1221□□WAG-103A3  
ctg4653□ctg1221□ctg1723□WAG-46A6  
ctg4653□ctg1221□ctg1723□WAG-53N21  
ctg4653□ctg1221□ctg1723□WAG-61N16  
ctg4653□ctg1221□ctg1723□WAG-79J12  
ctg4653□ctg1221□ctg1723□WAG-87B8  
ctg4653□ctg1221□ctg5484□WAG-16D17  
ctg4653□ctg1221□ctg5484□WAG-16N7  
ctg4653□ctg1221□ctg5999□WAG-73M4  
ctg4653□ctg1221□ctg5999□WAG-117H15  
ctg4653□ctg3349□ctg3405□WAG-40E22  
ctg4653□ctg3349□ctg3405□WAG-111H11  
ctg4653□ctg3349□ctg3405□WAG-130D11  
ctg4653□ctg3804□ctg4061□WAG-21J16  
ctg4653□ctg3804□ctg4061□WAG-76I16  
ctg4653□ctg3804□ctg4061□WAG-85J7  
ctg4653□ctg3825□□WAG-78L4  
ctg4653□ctg3825□ctg4087□WAG-17L6  
ctg4653□ctg3825□ctg4087□WAG-61I8  
ctg4653□ctg3825□ctg4087□WAG-61J7  
ctg4653□ctg3825□ctg4087□WAG-87J9  
ctg4654□□□WAG-A8  
ctg4654□□□WAG-23M15  
ctg4654□□□WAG-112I21  
ctg4654□ctg2452□ctg2363□WAG-11O7  
ctg4654□ctg2452□ctg2363□WAG-26K3  
ctg4654□ctg2452□ctg2363□WAG-73D23  
ctg4654□ctg2452□ctg2363□WAG-91K5  
ctg4654□ctg2452□ctg2363□WAG-129L13  
ctg4654□ctg4408□□WAG-8O21  
ctg4654□ctg4408□□WAG-46G21  
ctg4654□ctg4408□ctg6400□WAG-47K2  
ctg4654□ctg4408□ctg6400□WAG-74B17  
ctg4654□ctg749□□WAG-124N2  
ctg4654□ctg749□ctg764□WAG-21H20  
ctg4654□ctg749□ctg764□WAG-24G12  
ctg4654□ctg749□ctg764□WAG-83N22  
ctg4654□ctg749□ctg764□WAG-89N22  
ctg4654□ctg749□ctg764□WAG-114O18  
ctg4655□□□WAG-32J3  
ctg4655□□□WAG-45P3  
ctg4655□ctg1474□ctg1324□WAG-53B5  
ctg4655□ctg1474□ctg1324□WAG-82K6  
ctg4655□ctg1474□ctg1324□WAG-100J15  
ctg4655□ctg1474□ctg1324□WAG-110D10  
ctg4655□ctg1474□ctg1324□WAG-111O5  
ctg4655□ctg1474□ctg1324□WAG-112B12  
ctg4655□ctg274□ctg361□WAG-48H14  
ctg4655□ctg274□ctg361□WAG-51B16

ctg4655□ctg274□ctg361□WAG-71E7  
ctg4655□ctg274□ctg361□WAG-78K13  
ctg4655□ctg274□ctg361□WAG-97H10  
ctg4655□ctg274□ctg361□WAG-97H11  
ctg4655□ctg274□ctg361□WAG-104P19  
ctg4655□ctg274□ctg361□WAG-112K8  
ctg4655□ctg274□ctg361□WAG-117D4  
ctg4655□ctg274□ctg361□WAG-127A12  
ctg4655□ctg274□ctg361□WAG-130L20  
ctg4655□ctg274□ctg4838□WAG-3F8  
ctg4655□ctg274□ctg4838□WAG-69C12  
ctg4655□ctg3954□ctg4228□WAG-114E1  
ctg4655□ctg3954□ctg4228□WAG-114K19  
ctg4656□□□WAG-71A24  
ctg4656□□□WAG-99G24  
ctg4656□□□WAG-100O24  
ctg4656□ctg1426□□WAG-49N3  
ctg4656□ctg1426□ctg2054□WAG-37G23  
ctg4656□ctg1426□ctg2054□WAG-59F23  
ctg4656□ctg1426□ctg2054□WAG-60G14  
ctg4656□ctg1426□ctg2054□WAG-77P12  
ctg4656□ctg1426□ctg2054□WAG-78I24  
ctg4656□ctg1426□ctg2054□WAG-95O6  
ctg4656□ctg1733□□WAG-95C23  
ctg4656□ctg1733□□WAG-127J19  
ctg4656□ctg1733□ctg2775□WAG-48P3  
ctg4656□ctg1733□ctg2775□WAG-106O3  
ctg4656□ctg1733□ctg2775□WAG-108E12  
ctg4656□ctg3222□□WAG-90E18  
ctg4656□ctg3222□ctg4251□WAG-18A21  
ctg4656□ctg3222□ctg4251□WAG-26D18  
ctg4657□□□WAG-16H17  
ctg4657□□□WAG-28B21  
ctg4657□□□WAG-123E19  
ctg4657□ctg1204□□WAG-9K15  
ctg4657□ctg1204□ctg1344□WAG-9L24  
ctg4657□ctg1204□ctg1344□WAG-43G18  
ctg4657□ctg1204□ctg1344□WAG-46K21  
ctg4657□ctg1204□ctg1344□WAG-53F13  
ctg4657□ctg1204□ctg1344□WAG-70G16  
ctg4657□ctg1204□ctg1344□WAG-98O15  
ctg4657□ctg1204□ctg1344□WAG-109A13  
ctg4657□ctg1204□ctg1344□WAG-112M10  
ctg4657□ctg1204□ctg1344□WAG-114A22  
ctg4657□ctg1204□ctg1344□WAG-118E15  
ctg4657□ctg1629□ctg1955□WAG-9C18  
ctg4657□ctg1629□ctg1955□WAG-16D24  
ctg4657□ctg1629□ctg1955□WAG-64D15  
ctg4657□ctg1629□ctg1955□WAG-66F18  
ctg4657□ctg1629□ctg1955□WAG-80E17  
ctg4657□ctg1629□ctg1955□WAG-83P6  
ctg4657□ctg1629□ctg1955□WAG-96K13  
ctg4657□ctg1629□ctg1955□WAG-117A24  
ctg4658□□□WAG-28K24  
ctg4658□□□WAG-51M8  
ctg4658□□□WAG-116J18

ctg4659□□□WAG-26C3  
ctg4659□□□WAG-88H5  
ctg466□ctg1257□□WAG-14G21  
ctg466□ctg1257□□WAG-16E8  
ctg466□ctg1257□□WAG-22L6  
ctg466□ctg1257□□WAG-29H22  
ctg466□ctg1257□□WAG-103M19  
ctg466□ctg1257□□WAG-111J6  
ctg466□ctg1257□ctg2924□WAG-19I3  
ctg466□ctg1257□ctg2924□WAG-33O21  
ctg466□ctg1257□ctg2924□WAG-44E17  
ctg466□ctg1257□ctg2924□WAG-68E16  
ctg466□ctg1257□ctg2924□WAG-72C10  
ctg466□ctg1257□ctg2924□WAG-76M18  
ctg466□ctg1257□ctg4086□WAG-18N18  
ctg466□ctg1257□ctg4086□WAG-24D17  
ctg466□ctg1257□ctg4086□WAG-112F19  
ctg4660□ctg2185□□WAG-6N5  
ctg4660□ctg2185□ctg3415□WAG-25I22  
ctg4660□ctg2185□ctg3415□WAG-32E4  
ctg4660□ctg2185□ctg3415□WAG-45A21  
ctg4660□ctg2185□ctg3415□WAG-104D8  
ctg4660□ctg765□ctg616□WAG-3M16  
ctg4660□ctg765□ctg616□WAG-16C7  
ctg4660□ctg765□ctg616□WAG-43A9  
ctg4660□ctg765□ctg616□WAG-62O20  
ctg4660□ctg765□ctg616□WAG-71I14  
ctg4660□ctg765□ctg616□WAG-81K24  
ctg4660□ctg765□ctg616□WAG-87P24  
ctg4660□ctg765□ctg616□WAG-99I10  
ctg4660□ctg765□ctg616□WAG-123N11  
ctg4661□ctg1713□ctg1709□WAG-31D4  
ctg4661□ctg1713□ctg1709□WAG-36I13  
ctg4661□ctg1713□ctg1709□WAG-40M1  
ctg4661□ctg1713□ctg1709□WAG-55N4  
ctg4661□ctg1713□ctg1709□WAG-110K18  
ctg4661□ctg1713□ctg1709□WAG-120G24  
ctg4661□ctg1713□ctg6645□WAG-28B12  
ctg4661□ctg1713□ctg6645□WAG-55G24  
ctg4661□ctg6417□□WAG-5M16  
ctg4661□ctg6417□□WAG-6A9  
ctg4662□□□WAG-40A6  
ctg4662□□□WAG-46I15  
ctg4662□ctg1976□ctg2603□WAG-7D2  
ctg4662□ctg1976□ctg2603□WAG-32F10  
ctg4662□ctg1976□ctg2603□WAG-84A16  
ctg4662□ctg1976□ctg2603□WAG-84D18  
ctg4662□ctg1976□ctg2603□WAG-89D8  
ctg4662□ctg1976□ctg2603□WAG-105P1  
ctg4662□ctg1976□ctg2603□WAG-113A15  
ctg4662□ctg246□□WAG-7P8  
ctg4662□ctg246□□WAG-81G18  
ctg4662□ctg246□ctg246□WAG-10I2  
ctg4662□ctg246□ctg246□WAG-50N2  
ctg4662□ctg246□ctg246□WAG-55O13  
ctg4662□ctg246□ctg246□WAG-75F13

ctg4662□ctg246□ctg246□WAG-76E14  
ctg4662□ctg246□ctg246□WAG-85B8  
ctg4662□ctg246□ctg246□WAG-86K24  
ctg4662□ctg246□ctg246□WAG-90M5  
ctg4662□ctg246□ctg246□WAG-101F12  
ctg4662□ctg246□ctg246□WAG-108G14  
ctg4662□ctg246□ctg246□WAG-122J24  
ctg4663□ctg4325□□WAG-6A21  
ctg4663□ctg4325□□WAG-59N14  
ctg4663□ctg4325□□WAG-81H24  
ctg4664□□□WAG-41B5  
ctg4664□□□WAG-118N15  
ctg4664□ctg361□□WAG-97P23  
ctg4664□ctg361□□WAG-110O1  
ctg4664□ctg361□ctg3062□WAG-107D15  
ctg4664□ctg361□ctg3062□WAG-112C10  
ctg4664□ctg361□ctg3062□WAG-120N22  
ctg4664□ctg361□ctg3062□WAG-129H4  
ctg4664□ctg361□ctg5202□WAG-101O16  
ctg4664□ctg361□ctg5202□WAG-127K14  
ctg4664□ctg361□ctg580□WAG-42P10  
ctg4664□ctg361□ctg580□WAG-52N7  
ctg4664□ctg361□ctg580□WAG-55O8  
ctg4664□ctg361□ctg580□WAG-59C13  
ctg4664□ctg361□ctg580□WAG-65J5  
ctg4664□ctg361□ctg580□WAG-68E18  
ctg4664□ctg361□ctg580□WAG-70A1  
ctg4664□ctg361□ctg580□WAG-81D14  
ctg4664□ctg361□ctg580□WAG-90D9  
ctg4664□ctg361□ctg580□WAG-91G24  
ctg4664□ctg361□ctg580□WAG-126E7  
ctg4664□ctg361□ctg580□WAG-130I21  
ctg4664□ctg361□ctg604□WAG-10E21  
ctg4664□ctg361□ctg604□WAG-18J22  
ctg4664□ctg361□ctg604□WAG-59K23  
ctg4664□ctg361□ctg604□WAG-63G13  
ctg4664□ctg361□ctg604□WAG-69B16  
ctg4664□ctg361□ctg604□WAG-96B23  
ctg4664□ctg361□ctg604□WAG-107N24  
ctg4664□ctg361□ctg604□WAG-109B12  
ctg4664□ctg361□ctg604□WAG-115N3  
ctg4664□ctg361□ctg604□WAG-119O1  
ctg4664□ctg361□ctg604□WAG-123M17  
ctg4664□ctg361□ctg604□WAG-126M3  
ctg4664□ctg361□ctg6107□WAG-17M5  
ctg4664□ctg361□ctg6107□WAG-60O13  
ctg4665□□□WAG-86L9  
ctg4665□□□WAG-98E24  
ctg4665□ctg4224□ctg4432□WAG-104P9  
ctg4665□ctg4224□ctg4432□WAG-112B15  
ctg4666□ctg2354□□WAG-54G1  
ctg4666□ctg2354□ctg2257□WAG-18I5  
ctg4666□ctg2354□ctg2257□WAG-19B2  
ctg4666□ctg2354□ctg2257□WAG-87G7  
ctg4666□ctg2354□ctg2257□WAG-97B2  
ctg4666□ctg2354□ctg2257□WAG-105F5



ctg4667□□□WAG-11M23  
ctg4667□□□WAG-126P11  
ctg4667□ctg1990□□WAG-34K17  
ctg4667□ctg1990□□WAG-37L20  
ctg4667□ctg1990□□WAG-49M11  
ctg4667□ctg1990□□WAG-60E12  
ctg4667□ctg1990□ctg3346□WAG-20P14  
ctg4667□ctg1990□ctg3346□WAG-35O15  
ctg4667□ctg1990□ctg3346□WAG-68J11  
ctg4667□ctg1990□ctg4103□WAG-40J21  
ctg4667□ctg1990□ctg4103□WAG-96B4  
ctg4667□ctg1990□ctg4103□WAG-97G6  
ctg4667□ctg1990□ctg6337□WAG-37J10  
ctg4667□ctg1990□ctg6337□WAG-41L12  
ctg4667□ctg4174□ctg4412□WAG-43K12  
ctg4667□ctg4174□ctg4412□WAG-61G21  
ctg4668□□□WAG-80M19  
ctg4668□□□WAG-108N21  
ctg4668□□□WAG-125P13  
ctg4668□ctg2892□□WAG-30M5  
ctg4668□ctg2892□ctg2881□WAG-44I8  
ctg4668□ctg2892□ctg2881□WAG-50D3  
ctg4668□ctg2892□ctg2881□WAG-54E9  
ctg4669□ctg5288□ctg6122□WAG-50B8  
ctg4669□ctg5288□ctg6122□WAG-106J20  
ctg4669□ctg5950□□WAG-8P7  
ctg4669□ctg5950□□WAG-57D19  
ctg4669□ctg6410□□WAG-8L22  
ctg4669□ctg6410□□WAG-37I16  
ctg467□ctg1065□ctg907□WAG-26C15  
ctg467□ctg1065□ctg907□WAG-41E23  
ctg467□ctg1065□ctg907□WAG-99M16  
ctg467□ctg1065□ctg907□WAG-105P6  
ctg467□ctg1065□ctg907□WAG-108J22  
ctg467□ctg1065□ctg907□WAG-124N15  
ctg4670□□□WAG-K6  
ctg4670□□□WAG-1P23  
ctg4670□□□WAG-26A1  
ctg4670□□□WAG-61H23  
ctg4670□□□WAG-79L20  
ctg4670□ctg1646□□WAG-40O4  
ctg4670□ctg1646□ctg1561□WAG-55N3  
ctg4670□ctg1646□ctg1561□WAG-63N23  
ctg4670□ctg1646□ctg1561□WAG-79J15  
ctg4670□ctg1646□ctg1561□WAG-92F13  
ctg4670□ctg1646□ctg1561□WAG-102G14  
ctg4670□ctg2254□□WAG-42B15  
ctg4670□ctg2254□ctg3250□WAG-26F3  
ctg4670□ctg2254□ctg3250□WAG-79D2  
ctg4670□ctg2254□ctg3250□WAG-109D15  
ctg4670□ctg2254□ctg3455□WAG-15E5  
ctg4670□ctg2254□ctg3455□WAG-40I23  
ctg4670□ctg2254□ctg3455□WAG-122B19  
ctg4670□ctg764□□WAG-2N11  
ctg4670□ctg764□□WAG-8O19  
ctg4670□ctg764□□WAG-12G18

ctg4670□ctg764□□WAG-71O11  
ctg4670□ctg764□ctg1394□WAG-23E6  
ctg4670□ctg764□ctg1394□WAG-61K17  
ctg4670□ctg764□ctg1394□WAG-71M1  
ctg4670□ctg764□ctg1394□WAG-74B9  
ctg4670□ctg764□ctg1394□WAG-79I15  
ctg4670□ctg764□ctg1394□WAG-86D17  
ctg4670□ctg764□ctg1394□WAG-93L10  
ctg4670□ctg764□ctg1394□WAG-96L21  
ctg4670□ctg764□ctg1394□WAG-108D11  
ctg4670□ctg764□ctg1394□WAG-110M24  
ctg4670□ctg764□ctg1394□WAG-111G12  
ctg4670□ctg764□ctg2342□WAG-19F24  
ctg4670□ctg764□ctg2342□WAG-48O2  
ctg4670□ctg764□ctg2342□WAG-84D22  
ctg4670□ctg764□ctg2342□WAG-126C5  
ctg4671□□□WAG-109P21  
ctg4671□ctg357□□WAG-7E17  
ctg4671□ctg357□ctg1380□WAG-23L15  
ctg4671□ctg357□ctg1380□WAG-45A7  
ctg4671□ctg357□ctg1380□WAG-46E14  
ctg4671□ctg357□ctg1380□WAG-53G15  
ctg4671□ctg357□ctg1380□WAG-96C22  
ctg4671□ctg357□ctg1380□WAG-115L9  
ctg4671□ctg357□ctg263□WAG-7A8  
ctg4671□ctg357□ctg263□WAG-13L3  
ctg4671□ctg357□ctg263□WAG-41I14  
ctg4671□ctg357□ctg263□WAG-49N23  
ctg4671□ctg357□ctg263□WAG-56O5  
ctg4671□ctg357□ctg263□WAG-65C11  
ctg4671□ctg357□ctg263□WAG-94N17  
ctg4671□ctg357□ctg263□WAG-100C2  
ctg4672□ctg1601□□WAG-37E8  
ctg4672□ctg1601□ctg1920□WAG-47I13  
ctg4672□ctg1601□ctg1920□WAG-53P20  
ctg4672□ctg1601□ctg1920□WAG-65E20  
ctg4672□ctg1601□ctg1920□WAG-76H22  
ctg4672□ctg1601□ctg5232□WAG-15B21  
ctg4672□ctg1601□ctg5232□WAG-93N11  
ctg4673□ctg424□□WAG-78G24  
ctg4673□ctg424□ctg424□WAG-8P22  
ctg4673□ctg424□ctg424□WAG-17F15  
ctg4673□ctg424□ctg424□WAG-39F20  
ctg4673□ctg424□ctg424□WAG-47N5  
ctg4673□ctg424□ctg424□WAG-82M15  
ctg4673□ctg424□ctg424□WAG-84H21  
ctg4673□ctg424□ctg424□WAG-99A5  
ctg4673□ctg424□ctg424□WAG-118E3  
ctg4673□ctg424□ctg424□WAG-122J10  
ctg4673□ctg424□ctg424□WAG-126F18  
ctg4673□ctg424□ctg4471□WAG-66I5  
ctg4673□ctg424□ctg4471□WAG-97H22  
ctg4673□ctg424□ctg6862□WAG-78F9  
ctg4673□ctg424□ctg6862□WAG-83A3  
ctg4673□ctg424□ctg6975□WAG-10E5  
ctg4673□ctg424□ctg6975□WAG-40C2

ctg4673□ctg424□ctg6975□WAG-52B13  
ctg4673□ctg424□ctg6975□WAG-72E9  
ctg4673□ctg424□ctg6975□WAG-76A9  
ctg4673□ctg424□ctg6975□WAG-92M1  
ctg4673□ctg424□ctg6975□WAG-106N15  
ctg4674□ctg269□□WAG-82K9  
ctg4674□ctg269□ctg211□WAG-8A11  
ctg4674□ctg269□ctg211□WAG-25N22  
ctg4674□ctg269□ctg211□WAG-37N19  
ctg4674□ctg269□ctg211□WAG-55N11  
ctg4674□ctg269□ctg211□WAG-57P10  
ctg4674□ctg269□ctg211□WAG-77O2  
ctg4674□ctg269□ctg211□WAG-82G21  
ctg4674□ctg269□ctg211□WAG-88K17  
ctg4674□ctg269□ctg211□WAG-98K18  
ctg4674□ctg269□ctg211□WAG-106D17  
ctg4674□ctg269□ctg5900□WAG-67J20  
ctg4674□ctg269□ctg5900□WAG-93P2  
ctg4675□□□WAG-62B16  
ctg4675□□□WAG-86B9  
ctg4675□ctg349□ctg1250□WAG-10M15  
ctg4675□ctg349□ctg1250□WAG-11E6  
ctg4675□ctg349□ctg1250□WAG-38G23  
ctg4675□ctg349□ctg1250□WAG-77A15  
ctg4675□ctg349□ctg1250□WAG-94D16  
ctg4675□ctg349□ctg1250□WAG-98O20  
ctg4675□ctg349□ctg1250□WAG-100B15  
ctg4675□ctg349□ctg352□WAG-16K16  
ctg4675□ctg349□ctg352□WAG-20N21  
ctg4675□ctg349□ctg352□WAG-21F16  
ctg4675□ctg349□ctg352□WAG-29G23  
ctg4675□ctg349□ctg352□WAG-32K20  
ctg4675□ctg349□ctg352□WAG-45F23  
ctg4675□ctg349□ctg352□WAG-56A2  
ctg4675□ctg349□ctg352□WAG-60C2  
ctg4675□ctg349□ctg352□WAG-62G18  
ctg4675□ctg349□ctg352□WAG-89H4  
ctg4675□ctg349□ctg352□WAG-98I6  
ctg4675□ctg349□ctg352□WAG-108J21  
ctg4675□ctg349□ctg352□WAG-112M11  
ctg4675□ctg349□ctg352□WAG-116P12  
ctg4675□ctg349□ctg352□WAG-119A3  
ctg4675□ctg349□ctg352□WAG-126L13  
ctg4675□ctg349□ctg352□WAG-130D20  
ctg4675□ctg349□ctg6922□WAG-96P11  
ctg4675□ctg349□ctg6922□WAG-107G15  
ctg4676□ctg471□□WAG-24A23  
ctg4676□ctg471□□WAG-34C19  
ctg4676□ctg471□□WAG-37K7  
ctg4676□ctg471□□WAG-75L22  
ctg4676□ctg471□□WAG-109L11  
ctg4676□ctg471□ctg1155□WAG-18J18  
ctg4676□ctg471□ctg1155□WAG-32I15  
ctg4676□ctg471□ctg1155□WAG-52P1  
ctg4676□ctg471□ctg1155□WAG-58G6  
ctg4676□ctg471□ctg1155□WAG-80B14

ctg4676□ctg471□ctg1155□WAG-93N16  
ctg4676□ctg471□ctg1155□WAG-116F15  
ctg4676□ctg471□ctg1155□WAG-129P15  
ctg4676□ctg471□ctg2911□WAG-20O19  
ctg4676□ctg471□ctg2911□WAG-64B6  
ctg4676□ctg471□ctg2911□WAG-90I17  
ctg4676□ctg471□ctg383□WAG-3A18  
ctg4676□ctg471□ctg383□WAG-19A22  
ctg4676□ctg471□ctg383□WAG-59H21  
ctg4676□ctg471□ctg383□WAG-74N11  
ctg4676□ctg471□ctg383□WAG-76O19  
ctg4676□ctg471□ctg383□WAG-83K1  
ctg4676□ctg471□ctg383□WAG-84E18  
ctg4676□ctg471□ctg383□WAG-87K12  
ctg4676□ctg471□ctg383□WAG-113L22  
ctg4676□ctg471□ctg383□WAG-114P7  
ctg4676□ctg471□ctg383□WAG-122M17  
ctg4676□ctg471□ctg383□WAG-128P23  
ctg4676□ctg471□ctg5049□WAG-120H21  
ctg4676□ctg471□ctg5049□WAG-127G15  
ctg4676□ctg471□ctg5324□WAG-12N16  
ctg4676□ctg471□ctg5324□WAG-123F16  
ctg4676□ctg471□ctg5393□WAG-3H2  
ctg4676□ctg471□ctg5393□WAG-90P23  
ctg4677□ctg5732□□WAG-45I21  
ctg4677□ctg5732□□WAG-64P5  
ctg4678□□□WAG-7G19  
ctg4678□□□WAG-37L9  
ctg4678□ctg2005□□WAG-77O4  
ctg4678□ctg2005□ctg2535□WAG-16B19  
ctg4678□ctg2005□ctg2535□WAG-27E9  
ctg4678□ctg2005□ctg2535□WAG-84H11  
ctg4678□ctg3803□□WAG-25E17  
ctg4678□ctg3803□□WAG-110L8  
ctg4678□ctg3803□ctg5158□WAG-42B13  
ctg4678□ctg3803□ctg5158□WAG-74G21  
ctg4678□ctg969□□WAG-80C9  
ctg4678□ctg969□ctg1384□WAG-42N1  
ctg4678□ctg969□ctg1384□WAG-44M15  
ctg4678□ctg969□ctg1384□WAG-64C12  
ctg4678□ctg969□ctg1384□WAG-70G3  
ctg4678□ctg969□ctg1384□WAG-109F21  
ctg4678□ctg969□ctg1384□WAG-122E2  
ctg4678□ctg969□ctg1384□WAG-130F22  
ctg4679□□□WAG-39L20  
ctg4679□□□WAG-77G15  
ctg4679□ctg1691□□WAG-29J17  
ctg4679□ctg1691□□WAG-83I3  
ctg4679□ctg1691□□WAG-89L24  
ctg4679□ctg1691□□WAG-107B11  
ctg4679□ctg1691□ctg2512□WAG-24D23  
ctg4679□ctg1691□ctg2512□WAG-46B17  
ctg4679□ctg1691□ctg2512□WAG-129A11  
ctg4679□ctg1691□ctg2583□WAG-11C23  
ctg4679□ctg1691□ctg2583□WAG-66J4  
ctg4679□ctg1691□ctg2583□WAG-99C11

ctg4679□ctg1691□ctg2583□WAG-103A19  
ctg4679□ctg3900□□WAG-20A1  
ctg4679□ctg3900□ctg5201□WAG-8E12  
ctg4679□ctg3900□ctg5201□WAG-21C16  
ctg468□□□WAG-115L2  
ctg468□ctg1312□□WAG-28D24  
ctg468□ctg1312□□WAG-69C23  
ctg468□ctg1312□□WAG-84P1  
ctg468□ctg1312□ctg1526□WAG-90M1  
ctg468□ctg1312□ctg1526□WAG-104K11  
ctg468□ctg1312□ctg1526□WAG-129C7  
ctg468□ctg1312□ctg1526□WAG-129D14  
ctg468□ctg1312□ctg4577□WAG-10A12  
ctg468□ctg1312□ctg4577□WAG-26A22  
ctg468□ctg1312□ctg5648□WAG-33K5  
ctg468□ctg1312□ctg5648□WAG-39P19  
ctg4680□□□WAG-27L3  
ctg4680□□□WAG-63M20  
ctg4681□□□WAG-29K9  
ctg4681□□□WAG-30E15  
ctg4681□□□WAG-30P22  
ctg4681□□□WAG-54E14  
ctg4681□□□WAG-97B3  
ctg4681□□□WAG-114H14  
ctg4681□ctg1068□□WAG-34F4  
ctg4681□ctg1068□□WAG-71J13  
ctg4681□ctg1068□□WAG-104P11  
ctg4681□ctg1068□□WAG-124H22  
ctg4681□ctg1068□ctg1571□WAG-8L17  
ctg4681□ctg1068□ctg1571□WAG-15D5  
ctg4681□ctg1068□ctg1571□WAG-16P12  
ctg4681□ctg1068□ctg1571□WAG-22M22  
ctg4681□ctg1068□ctg1571□WAG-26C8  
ctg4681□ctg1068□ctg1571□WAG-52P14  
ctg4681□ctg1068□ctg1571□WAG-78O14  
ctg4681□ctg1068□ctg2348□WAG-41A24  
ctg4681□ctg1068□ctg2348□WAG-43C22  
ctg4681□ctg1068□ctg2348□WAG-44N15  
ctg4681□ctg1068□ctg2348□WAG-66P23  
ctg4681□ctg1068□ctg2348□WAG-85O3  
ctg4681□ctg1068□ctg2348□WAG-88K14  
ctg4681□ctg1068□ctg2348□WAG-110N13  
ctg4681□ctg1068□ctg4211□WAG-46N17  
ctg4681□ctg1068□ctg4211□WAG-65M4  
ctg4681□ctg1068□ctg4211□WAG-83H17  
ctg4681□ctg1068□ctg6167□WAG-45B20  
ctg4681□ctg1068□ctg6167□WAG-62P6  
ctg4681□ctg3027□ctg3026□WAG-63A16  
ctg4681□ctg3027□ctg3026□WAG-75M7  
ctg4681□ctg3027□ctg3026□WAG-88M8  
ctg4681□ctg5202□ctg5920□WAG-59N15  
ctg4681□ctg5202□ctg5920□WAG-126H13  
ctg4681□ctg5226□ctg5986□WAG-5P13  
ctg4681□ctg5226□ctg5986□WAG-102G2  
ctg4681□ctg6264□□WAG-12M16  
ctg4681□ctg6264□□WAG-84P22

ctg4681□ctg699□ctg565□WAG-11B18  
ctg4681□ctg699□ctg565□WAG-67L22  
ctg4681□ctg699□ctg565□WAG-85P13  
ctg4681□ctg699□ctg565□WAG-113A22  
ctg4681□ctg699□ctg565□WAG-122I8  
ctg4681□ctg699□ctg565□WAG-127F2  
ctg4682□□□WAG-7L1  
ctg4682□□□WAG-7N14  
ctg4682□□□WAG-41I10  
ctg4682□□□WAG-43P1  
ctg4682□□□WAG-109D24  
ctg4682□□□WAG-116F6  
ctg4682□ctg434□ctg1737□WAG-37L15  
ctg4682□ctg434□ctg1737□WAG-57N18  
ctg4682□ctg434□ctg1737□WAG-111M10  
ctg4682□ctg434□ctg1737□WAG-117B7  
ctg4682□ctg434□ctg3612□WAG-13B7  
ctg4682□ctg434□ctg3612□WAG-30B11  
ctg4682□ctg434□ctg3612□WAG-116J17  
ctg4682□ctg434□ctg590□WAG-29F22  
ctg4682□ctg434□ctg590□WAG-42G7  
ctg4682□ctg434□ctg590□WAG-49D9  
ctg4682□ctg434□ctg590□WAG-55P3  
ctg4682□ctg434□ctg590□WAG-63G8  
ctg4682□ctg434□ctg590□WAG-104F16  
ctg4682□ctg434□ctg590□WAG-112E17  
ctg4682□ctg434□ctg590□WAG-116L5  
ctg4682□ctg434□ctg590□WAG-118E4  
ctg4682□ctg4563□ctg4710□WAG-71O15  
ctg4682□ctg4563□ctg4710□WAG-82C6  
ctg4682□ctg5168□ctg5864□WAG-8E5  
ctg4682□ctg5168□ctg5864□WAG-43A23  
ctg4682□ctg5788□□WAG-122C14  
ctg4682□ctg5788□□WAG-125H21  
ctg4682□ctg990□□WAG-10C1  
ctg4682□ctg990□ctg4396□WAG-50B11  
ctg4682□ctg990□ctg4396□WAG-70C19  
ctg4682□ctg990□ctg6248□WAG-13I4  
ctg4682□ctg990□ctg6248□WAG-112J3  
ctg4682□ctg990□ctg836□WAG-21K6  
ctg4682□ctg990□ctg836□WAG-49G6  
ctg4682□ctg990□ctg836□WAG-71K12  
ctg4682□ctg990□ctg836□WAG-87M21  
ctg4682□ctg990□ctg836□WAG-92H22  
ctg4682□ctg990□ctg836□WAG-107E17  
ctg4683□ctg2889□ctg3762□WAG-60C15  
ctg4683□ctg2889□ctg3762□WAG-60L21  
ctg4683□ctg2889□ctg3762□WAG-87K23  
ctg4683□ctg2889□ctg3762□WAG-120G2  
ctg4684□ctg6003□□WAG-35D23  
ctg4684□ctg6003□□WAG-71G16  
ctg4685□□□WAG-107D17  
ctg4685□ctg661□ctg536□WAG-10I18  
ctg4685□ctg661□ctg536□WAG-58A15  
ctg4685□ctg661□ctg536□WAG-58J9  
ctg4685□ctg661□ctg536□WAG-60E10

ctg4685□ctg661□ctg536□WAG-63J23  
ctg4685□ctg661□ctg536□WAG-70H14  
ctg4685□ctg661□ctg536□WAG-99I22  
ctg4685□ctg661□ctg536□WAG-121D14  
ctg4686□□□WAG-3L13  
ctg4686□□□WAG-45B2  
ctg4686□ctg1036□□WAG-67D6  
ctg4686□ctg1036□ctg1191□WAG-53G13  
ctg4686□ctg1036□ctg1191□WAG-60E23  
ctg4686□ctg1036□ctg1191□WAG-97M9  
ctg4686□ctg1036□ctg1191□WAG-111A4  
ctg4686□ctg1410□ctg1260□WAG-45N1  
ctg4686□ctg1410□ctg1260□WAG-96G15  
ctg4686□ctg1410□ctg1260□WAG-99N1  
ctg4686□ctg1410□ctg1260□WAG-126M20  
ctg4686□ctg2114□ctg1982□WAG-11I24  
ctg4686□ctg2114□ctg1982□WAG-75E2  
ctg4686□ctg2114□ctg1982□WAG-89F19  
ctg4686□ctg2264□□WAG-66A15  
ctg4686□ctg2264□ctg2806□WAG-63E10  
ctg4686□ctg2264□ctg2806□WAG-76K24  
ctg4686□ctg2264□ctg2806□WAG-113K16  
ctg4687□ctg732□□WAG-33E17  
ctg4687□ctg732□□WAG-73L3  
ctg4687□ctg732□□WAG-108I13  
ctg4687□ctg732□ctg1292□WAG-23P15  
ctg4687□ctg732□ctg1292□WAG-26D17  
ctg4687□ctg732□ctg1292□WAG-33K22  
ctg4687□ctg732□ctg1292□WAG-35G9  
ctg4687□ctg732□ctg1292□WAG-45N21  
ctg4687□ctg732□ctg1292□WAG-65C2  
ctg4687□ctg732□ctg1292□WAG-70P23  
ctg4687□ctg732□ctg1292□WAG-72C6  
ctg4687□ctg732□ctg1292□WAG-75C16  
ctg4687□ctg732□ctg1292□WAG-75L15  
ctg4687□ctg732□ctg1292□WAG-79N23  
ctg4687□ctg732□ctg1292□WAG-82F13  
ctg4687□ctg732□ctg1292□WAG-95M8  
ctg4687□ctg732□ctg1292□WAG-96M24  
ctg4687□ctg732□ctg1292□WAG-129J4  
ctg4687□ctg799□ctg1365□WAG-16L14  
ctg4687□ctg799□ctg1365□WAG-43F5  
ctg4687□ctg799□ctg1365□WAG-48M13  
ctg4687□ctg799□ctg1365□WAG-57P8  
ctg4687□ctg799□ctg1365□WAG-66O20  
ctg4687□ctg799□ctg1365□WAG-83I13  
ctg4687□ctg799□ctg1365□WAG-106B6  
ctg4687□ctg799□ctg1365□WAG-127D9  
ctg4688□ctg3645□ctg3835□WAG-23O20  
ctg4688□ctg3645□ctg3835□WAG-42O3  
ctg4688□ctg3645□ctg3835□WAG-102C2  
ctg4689□ctg1858□□WAG-22K16  
ctg4689□ctg1858□□WAG-47N1  
ctg4689□ctg1858□□WAG-61E11  
ctg4689□ctg1858□ctg2843□WAG-29B3  
ctg4689□ctg1858□ctg2843□WAG-30C11

ctg4689□ctg1858□ctg2843□WAG-69J15  
ctg4689□ctg1858□ctg2843□WAG-101A8  
ctg4689□ctg1858□ctg2843□WAG-105M20  
ctg469□□□WAG-102C6  
ctg469□ctg1314□ctg1164□WAG-1I16  
ctg469□ctg1314□ctg1164□WAG-20G11  
ctg469□ctg1314□ctg1164□WAG-46M19  
ctg469□ctg1314□ctg1164□WAG-50A20  
ctg469□ctg1314□ctg1164□WAG-61M21  
ctg469□ctg1314□ctg1164□WAG-80G10  
ctg469□ctg1314□ctg1164□WAG-107H3  
ctg469□ctg1314□ctg1164□WAG-121L21  
ctg4690□□□WAG-104L22  
ctg4690□ctg815□□WAG-23F13  
ctg4690□ctg815□ctg1081□WAG-15N3  
ctg4690□ctg815□ctg1081□WAG-27B13  
ctg4690□ctg815□ctg1081□WAG-57D4  
ctg4690□ctg815□ctg1081□WAG-78F12  
ctg4690□ctg815□ctg1081□WAG-95F17  
ctg4690□ctg815□ctg1081□WAG-107I13  
ctg4690□ctg815□ctg1081□WAG-109K17  
ctg4690□ctg815□ctg1081□WAG-113N18  
ctg4690□ctg815□ctg1081□WAG-121P19  
ctg4691□ctg4205□□WAG-107O23  
ctg4691□ctg4205□ctg6610□WAG-37P5  
ctg4691□ctg4205□ctg6610□WAG-104P14  
ctg4692□ctg4868□ctg5155□WAG-66B24  
ctg4692□ctg4868□ctg5155□WAG-117M12  
ctg4693□ctg615□ctg666□WAG-11C11  
ctg4693□ctg615□ctg666□WAG-44I18  
ctg4693□ctg615□ctg666□WAG-96C9  
ctg4693□ctg615□ctg666□WAG-111O14  
ctg4693□ctg615□ctg666□WAG-116D5  
ctg4693□ctg615□ctg666□WAG-116N12  
ctg4694□□□WAG-56P1  
ctg4694□□□WAG-77F21  
ctg4694□ctg2481□ctg2404□WAG-8N3  
ctg4694□ctg2481□ctg2404□WAG-23J7  
ctg4694□ctg2481□ctg2404□WAG-89E5  
ctg4694□ctg2481□ctg2404□WAG-95J7  
ctg4694□ctg4892□ctg5216□WAG-79O10  
ctg4694□ctg4892□ctg5216□WAG-85A10  
ctg4695□□□WAG-14M3  
ctg4695□□□WAG-39I15  
ctg4695□□□WAG-65G6  
ctg4695□□□WAG-75G13  
ctg4695□ctg655□□WAG-66J1  
ctg4695□ctg655□□WAG-73D11  
ctg4695□ctg655□ctg3703□WAG-64E8  
ctg4695□ctg655□ctg3703□WAG-80G2  
ctg4695□ctg655□ctg3703□WAG-117C2  
ctg4695□ctg655□ctg876□WAG-17E19  
ctg4695□ctg655□ctg876□WAG-18H23  
ctg4695□ctg655□ctg876□WAG-44B13  
ctg4695□ctg655□ctg876□WAG-46N12  
ctg4695□ctg655□ctg876□WAG-55G16



ctg4695□ctg655□ctg876□WAG-83H19  
ctg4695□ctg655□ctg876□WAG-102A18  
ctg4695□ctg655□ctg876□WAG-111M12  
ctg4696□ctg862□□WAG-21I13  
ctg4696□ctg862□ctg1261□WAG-16B12  
ctg4696□ctg862□ctg1261□WAG-28M1  
ctg4696□ctg862□ctg1261□WAG-64E18  
ctg4696□ctg862□ctg1261□WAG-67N7  
ctg4696□ctg862□ctg1261□WAG-82L22  
ctg4696□ctg862□ctg1261□WAG-96C2  
ctg4696□ctg862□ctg1261□WAG-98D24  
ctg4696□ctg862□ctg1261□WAG-104J23  
ctg4696□ctg862□ctg1261□WAG-117J15  
ctg4696□ctg862□ctg1261□WAG-120L12  
ctg4697□□□WAG-12J16  
ctg4697□ctg1519□ctg1730□WAG-36K12  
ctg4697□ctg1519□ctg1730□WAG-55K2  
ctg4697□ctg1519□ctg1730□WAG-69E20  
ctg4697□ctg1519□ctg1730□WAG-77L24  
ctg4697□ctg1519□ctg1730□WAG-83A13  
ctg4697□ctg1519□ctg1730□WAG-94I4  
ctg4697□ctg1519□ctg1730□WAG-98G18  
ctg4698□□□WAG-26E5  
ctg4698□□□WAG-38E15  
ctg4698□□□WAG-60J1  
ctg4698□ctg1203□□WAG-32M18  
ctg4698□ctg1203□ctg1343□WAG-50O9  
ctg4698□ctg1203□ctg1343□WAG-111E12  
ctg4698□ctg1203□ctg1343□WAG-113N6  
ctg4698□ctg1203□ctg1343□WAG-117O6  
ctg4698□ctg1203□ctg1343□WAG-119M8  
ctg4698□ctg1495□□WAG-12P13  
ctg4698□ctg1495□□WAG-58M12  
ctg4698□ctg1495□□WAG-89H10  
ctg4698□ctg1495□ctg1342□WAG-24I24  
ctg4698□ctg1495□ctg1342□WAG-81D24  
ctg4698□ctg1495□ctg1342□WAG-85M10  
ctg4698□ctg1495□ctg1342□WAG-86C18  
ctg4698□ctg1495□ctg1342□WAG-107B3  
ctg4698□ctg1495□ctg1342□WAG-113C18  
ctg4698□ctg1495□ctg2403□WAG-32C23  
ctg4698□ctg1495□ctg2403□WAG-38I1  
ctg4698□ctg1495□ctg2403□WAG-39B9  
ctg4698□ctg1495□ctg2403□WAG-61N3  
ctg4698□ctg1495□ctg2403□WAG-85P5  
ctg4698□ctg1495□ctg2403□WAG-114I20  
ctg4698□ctg1495□ctg2734□WAG-5F22  
ctg4698□ctg1495□ctg2734□WAG-61H1  
ctg4698□ctg1495□ctg2734□WAG-108A21  
ctg4698□ctg1495□ctg2734□WAG-113B7  
ctg4698□ctg1495□ctg3649□WAG-20K18  
ctg4698□ctg1495□ctg3649□WAG-74O8  
ctg4698□ctg1495□ctg3649□WAG-76M4  
ctg4698□ctg4216□□WAG-52J8  
ctg4698□ctg4216□ctg5570□WAG-64K10  
ctg4698□ctg4216□ctg5570□WAG-68E1

ctg4698□ctg6595□□WAG-31E14  
ctg4698□ctg6595□□WAG-52J9  
ctg4699□□□WAG-2M2  
ctg4699□ctg4722□ctg4908□WAG-33O20  
ctg4699□ctg4722□ctg4908□WAG-108K19  
ctg47□□□WAG-30G5  
ctg47□ctg2929□ctg2904□WAG-67H18  
ctg47□ctg2929□ctg2904□WAG-68B23  
ctg47□ctg2929□ctg2904□WAG-97B23  
ctg47□ctg301□□WAG-112A15  
ctg47□ctg301□ctg301□WAG-20H3  
ctg47□ctg301□ctg301□WAG-29K19  
ctg47□ctg301□ctg301□WAG-30I16  
ctg47□ctg301□ctg301□WAG-42J18  
ctg47□ctg301□ctg301□WAG-64I24  
ctg47□ctg301□ctg301□WAG-86I9  
ctg47□ctg301□ctg301□WAG-90L23  
ctg47□ctg301□ctg301□WAG-98N10  
ctg47□ctg301□ctg301□WAG-123K12  
ctg47□ctg301□ctg301□WAG-130A14  
ctg47□ctg6027□□WAG-16M23  
ctg47□ctg6027□□WAG-100J6  
ctg470□ctg1071□□WAG-63A11  
ctg470□ctg1071□ctg1628□WAG-58H16  
ctg470□ctg1071□ctg1628□WAG-77H23  
ctg470□ctg1071□ctg1628□WAG-94I13  
ctg470□ctg1071□ctg1628□WAG-129A15  
ctg4700□□□WAG-61L20  
ctg4700□ctg2396□ctg2297□WAG-74C3  
ctg4700□ctg2396□ctg2297□WAG-86P13  
ctg4700□ctg2396□ctg2297□WAG-102L19  
ctg4701□ctg1650□□WAG-20J9  
ctg4701□ctg1650□□WAG-92A3  
ctg4701□ctg1650□□WAG-112E11  
ctg4701□ctg1650□ctg2392□WAG-54D10  
ctg4701□ctg1650□ctg2392□WAG-59A1  
ctg4701□ctg1650□ctg2392□WAG-71P6  
ctg4701□ctg1650□ctg2392□WAG-90A15  
ctg4701□ctg1650□ctg2392□WAG-98J10  
ctg4702□□□WAG-21J18  
ctg4702□ctg1364□□WAG-33D12  
ctg4702□ctg1364□□WAG-60M2  
ctg4702□ctg1364□□WAG-81F11  
ctg4702□ctg1364□ctg1705□WAG-46O3  
ctg4702□ctg1364□ctg1705□WAG-56G8  
ctg4702□ctg1364□ctg1705□WAG-74N1  
ctg4702□ctg1364□ctg1705□WAG-96E1  
ctg4702□ctg1364□ctg1705□WAG-97D17  
ctg4702□ctg1364□ctg1705□WAG-114H19  
ctg4702□ctg1364□ctg1705□WAG-115H6  
ctg4702□ctg1364□ctg1705□WAG-119A2  
ctg4702□ctg1364□ctg1705□WAG-120F10  
ctg4702□ctg1364□ctg2926□WAG-44M6  
ctg4702□ctg1364□ctg2926□WAG-115P5  
ctg4702□ctg1364□ctg2926□WAG-117L16  
ctg4702□ctg1364□ctg2926□WAG-119N8

ctg4702□ctg2733□ctg2788□WAG-17E3  
ctg4702□ctg2733□ctg2788□WAG-81A5  
ctg4702□ctg2733□ctg2788□WAG-109M24  
ctg4702□ctg2733□ctg5722□WAG-70N3  
ctg4702□ctg2733□ctg5722□WAG-100A7  
ctg4703□□□WAG-38E16  
ctg4703□□□WAG-94C14  
ctg4703□□□WAG-94O11  
ctg4703□ctg1980□□WAG-5H14  
ctg4703□ctg1980□□WAG-18H1  
ctg4703□ctg1980□ctg2187□WAG-20A23  
ctg4703□ctg1980□ctg2187□WAG-71L18  
ctg4703□ctg1980□ctg2187□WAG-72L16  
ctg4703□ctg1980□ctg2187□WAG-98D5  
ctg4703□ctg1980□ctg3189□WAG-29E13  
ctg4703□ctg1980□ctg3189□WAG-60D8  
ctg4703□ctg1980□ctg3189□WAG-103B5  
ctg4703□ctg3873□□WAG-7B9  
ctg4703□ctg3873□ctg5073□WAG-44G2  
ctg4703□ctg3873□ctg5073□WAG-129O10  
ctg4704□ctg1386□ctg1229□WAG-29P20  
ctg4704□ctg1386□ctg1229□WAG-30D23  
ctg4704□ctg1386□ctg1229□WAG-49K4  
ctg4704□ctg1386□ctg1229□WAG-119A12  
ctg4704□ctg1386□ctg1229□WAG-127L3  
ctg4704□ctg2300□□WAG-24G3  
ctg4704□ctg2300□ctg3704□WAG-63K19  
ctg4704□ctg2300□ctg3704□WAG-64G16  
ctg4704□ctg2300□ctg3704□WAG-116I24  
ctg4704□ctg2300□ctg5652□WAG-9A12  
ctg4704□ctg2300□ctg5652□WAG-17I18  
ctg4705□ctg3026□□WAG-10E22  
ctg4705□ctg3026□□WAG-26K16  
ctg4705□ctg3026□□WAG-27P18  
ctg4705□ctg3026□□WAG-72I23  
ctg4705□ctg3026□ctg5161□WAG-64I13  
ctg4705□ctg3026□ctg5161□WAG-79K23  
ctg4706□ctg2161□□WAG-46D7  
ctg4706□ctg2161□ctg2038□WAG-15J1  
ctg4706□ctg2161□ctg2038□WAG-78D5  
ctg4706□ctg2161□ctg2038□WAG-92M9  
ctg4706□ctg2161□ctg3123□WAG-78E22  
ctg4706□ctg2161□ctg3123□WAG-93M6  
ctg4706□ctg2161□ctg3123□WAG-95E5  
ctg4707□ctg1479□ctg1329□WAG-35D20  
ctg4707□ctg1479□ctg1329□WAG-63A22  
ctg4707□ctg1479□ctg1329□WAG-93K12  
ctg4707□ctg1479□ctg1329□WAG-94H9  
ctg4707□ctg1479□ctg1329□WAG-101H1  
ctg4708□□□WAG-26N14  
ctg4708□ctg3340□□WAG-9L18  
ctg4708□ctg3340□□WAG-11K10  
ctg4708□ctg3340□□WAG-72J13  
ctg4708□ctg3340□□WAG-115J18  
ctg4708□ctg3340□ctg5839□WAG-52O8  
ctg4708□ctg3340□ctg5839□WAG-123E14

ctg4709□□□WAG-2C6  
ctg4709□□□WAG-53G1  
ctg4709□ctg2063□□WAG-23I23  
ctg4709□ctg2063□□WAG-29L11  
ctg4709□ctg2063□ctg2614□WAG-100F10  
ctg4709□ctg2063□ctg2614□WAG-100L21  
ctg4709□ctg2063□ctg2614□WAG-110D15  
ctg4709□ctg2063□ctg4174□WAG-14B23  
ctg4709□ctg2063□ctg4174□WAG-44F5  
ctg4709□ctg4048□□WAG-56O11  
ctg4709□ctg4048□ctg6025□WAG-41P16  
ctg4709□ctg4048□ctg6025□WAG-59L3  
ctg471□□□WAG-2N23  
ctg471□□□WAG-7E6  
ctg471□ctg1575□□WAG-105G22  
ctg471□ctg1575□ctg1421□WAG-6B19  
ctg471□ctg1575□ctg1421□WAG-21P18  
ctg471□ctg1575□ctg1421□WAG-22P2  
ctg471□ctg1575□ctg1421□WAG-28N5  
ctg471□ctg1575□ctg1421□WAG-73P15  
ctg471□ctg1575□ctg1421□WAG-77I14  
ctg4710□□□WAG-106H7  
ctg4710□□□WAG-126N1  
ctg4710□ctg2910□□WAG-26J11  
ctg4710□ctg2910□ctg4712□WAG-72N7  
ctg4710□ctg2910□ctg4712□WAG-79D8  
ctg4710□ctg2910□ctg6729□WAG-59C18  
ctg4710□ctg2910□ctg6729□WAG-110I16  
ctg4711□□□WAG-72D19  
ctg4711□□□WAG-98A12  
ctg4711□ctg6563□□WAG-8F6  
ctg4711□ctg6563□□WAG-24G1  
ctg4712□ctg3382□ctg3465□WAG-61J9  
ctg4712□ctg3382□ctg3465□WAG-73O11  
ctg4712□ctg3382□ctg3465□WAG-107O3  
ctg4712□ctg6425□□WAG-92H7  
ctg4712□ctg6425□□WAG-108I15  
ctg4713□ctg452□ctg463□WAG-5J1  
ctg4713□ctg452□ctg463□WAG-29K1  
ctg4713□ctg452□ctg463□WAG-74I6  
ctg4713□ctg452□ctg463□WAG-80D7  
ctg4713□ctg452□ctg463□WAG-85L2  
ctg4713□ctg452□ctg463□WAG-91C11  
ctg4713□ctg452□ctg463□WAG-92F1  
ctg4713□ctg452□ctg463□WAG-122I24  
ctg4714□□□WAG-19J15  
ctg4714□ctg1512□ctg1427□WAG-1P11  
ctg4714□ctg1512□ctg1427□WAG-4K10  
ctg4714□ctg1512□ctg1427□WAG-9B6  
ctg4714□ctg1512□ctg1427□WAG-22H13  
ctg4714□ctg1512□ctg1427□WAG-26J14  
ctg4714□ctg1512□ctg1427□WAG-70H22  
ctg4714□ctg1512□ctg1427□WAG-74C2  
ctg4714□ctg1512□ctg1427□WAG-122N15  
ctg4714□ctg1512□ctg1427□WAG-129L16  
ctg4714□ctg1512□ctg1427□WAG-130M15

ctg4714□ctg2000□□WAG-111J1  
ctg4714□ctg2000□ctg1845□WAG-16K6  
ctg4714□ctg2000□ctg1845□WAG-17E21  
ctg4714□ctg2000□ctg1845□WAG-28M2  
ctg4714□ctg2000□ctg1845□WAG-68O8  
ctg4715□□□WAG-46C18  
ctg4715□ctg5659□ctg6827□WAG-72A10  
ctg4715□ctg5659□ctg6827□WAG-105N17  
ctg4716□□□WAG-1I2  
ctg4716□□□WAG-65E22  
ctg4716□ctg211□□WAG-74F15  
ctg4716□ctg211□ctg275□WAG-37D15  
ctg4716□ctg211□ctg275□WAG-42E5  
ctg4716□ctg211□ctg275□WAG-67P5  
ctg4716□ctg211□ctg275□WAG-95H1  
ctg4716□ctg211□ctg275□WAG-100C24  
ctg4716□ctg211□ctg275□WAG-102P7  
ctg4716□ctg211□ctg275□WAG-120M7  
ctg4716□ctg211□ctg275□WAG-129O22  
ctg4716□ctg211□ctg275□WAG-130E1  
ctg4717□□□WAG-13F16  
ctg4717□ctg317□ctg972□WAG-10A15  
ctg4717□ctg317□ctg972□WAG-13P16  
ctg4717□ctg317□ctg972□WAG-18F9  
ctg4717□ctg317□ctg972□WAG-23M5  
ctg4717□ctg317□ctg972□WAG-24F6  
ctg4717□ctg317□ctg972□WAG-29E16  
ctg4717□ctg317□ctg972□WAG-46N19  
ctg4717□ctg317□ctg972□WAG-53N15  
ctg4717□ctg317□ctg972□WAG-54J7  
ctg4717□ctg317□ctg972□WAG-70B6  
ctg4717□ctg317□ctg972□WAG-93D19  
ctg4717□ctg317□ctg972□WAG-94P9  
ctg4717□ctg317□ctg972□WAG-120H22  
ctg4717□ctg317□ctg972□WAG-130B14  
ctg4718□ctg2936□ctg2910□WAG-59N2  
ctg4718□ctg2936□ctg2910□WAG-65B13  
ctg4718□ctg2936□ctg2910□WAG-66A5  
ctg4719□ctg1025□ctg852□WAG-15L17  
ctg4719□ctg1025□ctg852□WAG-78P1  
ctg4719□ctg1025□ctg852□WAG-94E19  
ctg4719□ctg1025□ctg852□WAG-103E14  
ctg472□ctg1073□ctg1202□WAG-14J3  
ctg472□ctg1073□ctg1202□WAG-26P5  
ctg472□ctg1073□ctg1202□WAG-46N10  
ctg472□ctg1073□ctg1202□WAG-89C15  
ctg472□ctg1073□ctg1202□WAG-103A20  
ctg4720□□□WAG-37P20  
ctg4720□□□WAG-98I21  
ctg4720□ctg1272□□WAG-54A2  
ctg4720□ctg1272□□WAG-56F20  
ctg4720□ctg1272□□WAG-76K14  
ctg4720□ctg1272□□WAG-77G4  
ctg4720□ctg1272□□WAG-96E3  
ctg4720□ctg1272□ctg2454□WAG-23O8  
ctg4720□ctg1272□ctg2454□WAG-49L19

ctg4720□ctg1272□ctg2454□WAG-121M4  
ctg4720□ctg1272□ctg5343□WAG-71A13  
ctg4720□ctg1272□ctg5343□WAG-90F4  
ctg4720□ctg1272□ctg5426□WAG-12A11  
ctg4720□ctg1272□ctg5426□WAG-56F23  
ctg4721□ctg5571□□WAG-18P14  
ctg4721□ctg5571□□WAG-93C7  
ctg4722□□□WAG-69D19  
ctg4722□ctg1263□ctg1101□WAG-85P10  
ctg4722□ctg1263□ctg1101□WAG-92H19  
ctg4722□ctg1263□ctg1101□WAG-92K6  
ctg4722□ctg1263□ctg1101□WAG-109D12  
ctg4722□ctg1961□□WAG-94G3  
ctg4722□ctg1961□□WAG-123B8  
ctg4722□ctg1961□ctg3151□WAG-34L4  
ctg4722□ctg1961□ctg3151□WAG-71G5  
ctg4722□ctg1961□ctg3151□WAG-106C22  
ctg4722□ctg1961□ctg3151□WAG-120M3  
ctg4722□ctg1961□ctg4101□WAG-15P20  
ctg4722□ctg1961□ctg4101□WAG-37D7  
ctg4722□ctg1961□ctg4101□WAG-98A21  
ctg4722□ctg1961□ctg6605□WAG-26B16  
ctg4722□ctg1961□ctg6605□WAG-108G7  
ctg4722□ctg893□ctg6625□WAG-13K8  
ctg4722□ctg893□ctg6625□WAG-89I17  
ctg4722□ctg893□ctg736□WAG-17O9  
ctg4722□ctg893□ctg736□WAG-46A13  
ctg4722□ctg893□ctg736□WAG-56K24  
ctg4722□ctg893□ctg736□WAG-68H23  
ctg4722□ctg893□ctg736□WAG-113J18  
ctg4722□ctg893□ctg736□WAG-113J19  
ctg4723□□□WAG-15N22  
ctg4723□ctg1609□ctg1457□WAG-2O13  
ctg4723□ctg1609□ctg1457□WAG-11H7  
ctg4723□ctg1609□ctg1457□WAG-34F7  
ctg4723□ctg1609□ctg1457□WAG-111A16  
ctg4724□□□WAG-7G5  
ctg4724□ctg1138□□WAG-34H3  
ctg4724□ctg1138□ctg1316□WAG-26J8  
ctg4724□ctg1138□ctg1316□WAG-29M22  
ctg4724□ctg1138□ctg1316□WAG-36E21  
ctg4724□ctg1138□ctg1316□WAG-84B4  
ctg4724□ctg1138□ctg1316□WAG-85A11  
ctg4724□ctg1138□ctg1316□WAG-87C18  
ctg4724□ctg1138□ctg1316□WAG-110C6  
ctg4724□ctg1138□ctg1316□WAG-124F7  
ctg4724□ctg1138□ctg1316□WAG-124H7  
ctg4724□ctg25□□WAG-1C20  
ctg4724□ctg25□ctg32□WAG-2C3  
ctg4724□ctg25□ctg32□WAG-10G18  
ctg4724□ctg25□ctg32□WAG-22M6  
ctg4724□ctg25□ctg32□WAG-46E22  
ctg4724□ctg25□ctg32□WAG-49B17  
ctg4724□ctg25□ctg32□WAG-68J23  
ctg4724□ctg25□ctg32□WAG-83I12  
ctg4724□ctg25□ctg32□WAG-86C21

ctg4724□ctg25□ctg32□WAG-89C2  
ctg4724□ctg25□ctg32□WAG-90O13  
ctg4724□ctg25□ctg32□WAG-91B18  
ctg4724□ctg25□ctg32□WAG-103K11  
ctg4724□ctg25□ctg32□WAG-113I21  
ctg4724□ctg25□ctg32□WAG-123D16  
ctg4724□ctg25□ctg32□WAG-125E2  
ctg4724□ctg25□ctg32□WAG-125F22  
ctg4724□ctg25□ctg32□WAG-125H10  
ctg4724□ctg25□ctg748□WAG-13I15  
ctg4724□ctg25□ctg748□WAG-30H16  
ctg4724□ctg25□ctg748□WAG-40F22  
ctg4724□ctg25□ctg748□WAG-60E6  
ctg4724□ctg25□ctg748□WAG-63N10  
ctg4724□ctg25□ctg748□WAG-70C9  
ctg4724□ctg25□ctg748□WAG-106J9  
ctg4724□ctg25□ctg748□WAG-116N19  
ctg4724□ctg25□ctg748□WAG-117G3  
ctg4724□ctg830□ctg681□WAG-23C6  
ctg4724□ctg830□ctg681□WAG-27H5  
ctg4724□ctg830□ctg681□WAG-32M13  
ctg4724□ctg830□ctg681□WAG-70B12  
ctg4724□ctg830□ctg681□WAG-79K12  
ctg4724□ctg830□ctg681□WAG-89F11  
ctg4724□ctg830□ctg681□WAG-102L12  
ctg4724□ctg830□ctg681□WAG-111K23  
ctg4724□ctg830□ctg681□WAG-123E11  
ctg4724□ctg830□ctg681□WAG-130C23  
ctg4725□□□WAG-18L15  
ctg4725□□□WAG-70H18  
ctg4725□ctg1207□□WAG-9M10  
ctg4725□ctg1207□ctg1896□WAG-20O5  
ctg4725□ctg1207□ctg1896□WAG-36B16  
ctg4725□ctg1207□ctg1896□WAG-71F16  
ctg4725□ctg1207□ctg1896□WAG-80P18  
ctg4725□ctg1207□ctg1896□WAG-117I20  
ctg4725□ctg1207□ctg6641□WAG-60J12  
ctg4725□ctg1207□ctg6641□WAG-77M24  
ctg4726□□□WAG-43A14  
ctg4726□□□WAG-65N23  
ctg4726□□□WAG-67K10  
ctg4726□□□WAG-71I22  
ctg4726□□□WAG-118P5  
ctg4726□ctg5159□ctg5838□WAG-100C16  
ctg4726□ctg5159□ctg5838□WAG-123F7  
ctg4726□ctg587□□□WAG-8P9  
ctg4726□ctg587□□□WAG-40I5  
ctg4726□ctg587□ctg646□WAG-9H1  
ctg4726□ctg587□ctg646□WAG-9L5  
ctg4726□ctg587□ctg646□WAG-22A8  
ctg4726□ctg587□ctg646□WAG-23E15  
ctg4726□ctg587□ctg646□WAG-29B7  
ctg4726□ctg587□ctg646□WAG-34B17  
ctg4726□ctg587□ctg646□WAG-51N16  
ctg4726□ctg587□ctg646□WAG-58A8  
ctg4726□ctg587□ctg646□WAG-80B20

ctg4726□ctg587□ctg646□WAG-83F17  
ctg4726□ctg587□ctg646□WAG-117K8  
ctg4726□ctg587□ctg646□WAG-118O11  
ctg4726□ctg587□ctg646□WAG-130F6  
ctg4726□ctg587□ctg6871□WAG-28L10  
ctg4726□ctg587□ctg6871□WAG-123H16  
ctg4726□ctg5945□□WAG-41P7  
ctg4726□ctg5945□□WAG-68A21  
ctg4727□□□WAG-G13  
ctg4727□ctg1076□□WAG-77M7  
ctg4727□ctg1076□ctg1965□WAG-39L19  
ctg4727□ctg1076□ctg1965□WAG-76P7  
ctg4727□ctg1076□ctg1965□WAG-78B20  
ctg4727□ctg1076□ctg1965□WAG-85N7  
ctg4727□ctg1076□ctg1965□WAG-108D16  
ctg4727□ctg1076□ctg1965□WAG-124P1  
ctg4727□ctg3285□□WAG-11D11  
ctg4727□ctg3285□□WAG-49I1  
ctg4727□ctg3285□ctg3677□WAG-16K8  
ctg4727□ctg3285□ctg3677□WAG-47H6  
ctg4727□ctg3285□ctg3677□WAG-82D18  
ctg4727□ctg3285□ctg3677□WAG-100L13  
ctg4728□□□WAG-18P10  
ctg4728□□□WAG-27E6  
ctg4728□□□WAG-27P4  
ctg4728□□□WAG-33P10  
ctg4728□□□WAG-34G8  
ctg4728□□□WAG-110P20  
ctg4728□ctg2820□□WAG-123E16  
ctg4728□ctg2820□ctg3838□WAG-45A3  
ctg4728□ctg2820□ctg3838□WAG-99P12  
ctg4728□ctg2820□ctg3838□WAG-101K23  
ctg4728□ctg2820□ctg3838□WAG-119N6  
ctg4728□ctg648□□WAG-3H19  
ctg4728□ctg648□ctg5710□WAG-101A18  
ctg4728□ctg648□ctg5710□WAG-108B4  
ctg4728□ctg648□ctg854□WAG-20J17  
ctg4728□ctg648□ctg854□WAG-20K12  
ctg4728□ctg648□ctg854□WAG-35M2  
ctg4728□ctg648□ctg854□WAG-41C21  
ctg4728□ctg648□ctg854□WAG-59J4  
ctg4728□ctg648□ctg854□WAG-87P17  
ctg4728□ctg648□ctg854□WAG-127O17  
ctg4729□□□WAG-5P21  
ctg4729□□□WAG-73I5  
ctg4729□□□WAG-80J10  
ctg4729□ctg2260□□WAG-6M16  
ctg4729□ctg2260□□WAG-66I10  
ctg4729□ctg2260□□WAG-92O14  
ctg4729□ctg2260□ctg3818□WAG-31B9  
ctg4729□ctg2260□ctg3818□WAG-41J22  
ctg4729□ctg2260□ctg3818□WAG-80C4  
ctg4729□ctg2260□ctg3818□WAG-104H9  
ctg4729□ctg232□ctg186□WAG-26I16  
ctg4729□ctg232□ctg186□WAG-47G7  
ctg4729□ctg232□ctg186□WAG-64I12



ctg4729□ctg232□ctg186□WAG-70P4  
ctg4729□ctg232□ctg186□WAG-114C7  
ctg4729□ctg232□ctg186□WAG-124B23  
ctg4729□ctg232□ctg186□WAG-124F14  
ctg4729□ctg232□ctg186□WAG-130I20  
ctg473□□□WAG-75O21  
ctg473□ctg1483□ctg1560□WAG-16N14  
ctg473□ctg1483□ctg1560□WAG-71K1  
ctg473□ctg1483□ctg1560□WAG-82P4  
ctg473□ctg1483□ctg1560□WAG-90E10  
ctg473□ctg1483□ctg1560□WAG-111P21  
ctg473□ctg1483□ctg1560□WAG-118K10  
ctg473□ctg1483□ctg1560□WAG-121D16  
ctg473□ctg1483□ctg1560□WAG-125M18  
ctg4730□□□WAG-73K3  
ctg4730□□□WAG-122L14  
ctg4730□ctg9□□WAG-76A4  
ctg4730□ctg9□□WAG-85O19  
ctg4730□ctg9□ctg3366□WAG-24G8  
ctg4730□ctg9□ctg3366□WAG-25B13  
ctg4730□ctg9□ctg3366□WAG-64E11  
ctg4730□ctg9□ctg3366□WAG-126I5  
ctg4730□ctg9□ctg8□WAG-10B11  
ctg4730□ctg9□ctg8□WAG-14A22  
ctg4730□ctg9□ctg8□WAG-15G2  
ctg4730□ctg9□ctg8□WAG-18K7  
ctg4730□ctg9□ctg8□WAG-19K9  
ctg4730□ctg9□ctg8□WAG-19O3  
ctg4730□ctg9□ctg8□WAG-21I10  
ctg4730□ctg9□ctg8□WAG-57N17  
ctg4730□ctg9□ctg8□WAG-58G7  
ctg4730□ctg9□ctg8□WAG-63I10  
ctg4730□ctg9□ctg8□WAG-71I1  
ctg4730□ctg9□ctg8□WAG-81H15  
ctg4730□ctg9□ctg8□WAG-82G8  
ctg4730□ctg9□ctg8□WAG-91N18  
ctg4730□ctg9□ctg8□WAG-92E7  
ctg4730□ctg9□ctg8□WAG-109B13  
ctg4730□ctg9□ctg8□WAG-111D23  
ctg4731□ctg1275□□WAG-36D1  
ctg4731□ctg1275□□WAG-43H15  
ctg4731□ctg1275□□WAG-94P22  
ctg4731□ctg1275□□WAG-100C8  
ctg4731□ctg1275□ctg1885□WAG-19J22  
ctg4731□ctg1275□ctg1885□WAG-38C11  
ctg4731□ctg1275□ctg1885□WAG-75P5  
ctg4731□ctg1275□ctg1885□WAG-111K12  
ctg4731□ctg1275□ctg1915□WAG-15I19  
ctg4731□ctg1275□ctg1915□WAG-42C15  
ctg4731□ctg1275□ctg1915□WAG-65O10  
ctg4731□ctg1275□ctg1915□WAG-66H16  
ctg4731□ctg1275□ctg1915□WAG-77F19  
ctg4731□ctg1275□ctg1915□WAG-82A14  
ctg4732□□□WAG-3B12  
ctg4732□□□WAG-52N20  
ctg4732□ctg125□ctg134□WAG-3A12

ctg4732□ctg125□ctg134□WAG-3I11  
ctg4732□ctg125□ctg134□WAG-4K18  
ctg4732□ctg125□ctg134□WAG-17F11  
ctg4732□ctg125□ctg134□WAG-24H5  
ctg4732□ctg125□ctg134□WAG-38L6  
ctg4732□ctg125□ctg134□WAG-42K4  
ctg4732□ctg125□ctg134□WAG-53H7  
ctg4732□ctg125□ctg134□WAG-66A10  
ctg4732□ctg125□ctg134□WAG-76P4  
ctg4732□ctg125□ctg134□WAG-80D23  
ctg4732□ctg125□ctg134□WAG-93J1  
ctg4732□ctg125□ctg134□WAG-95M4  
ctg4732□ctg125□ctg134□WAG-97M19  
ctg4732□ctg125□ctg134□WAG-101J7  
ctg4732□ctg125□ctg134□WAG-112E15  
ctg4732□ctg125□ctg134□WAG-121C8  
ctg4732□ctg125□ctg134□WAG-125N4  
ctg4732□ctg2860□ctg2848□WAG-49J15  
ctg4732□ctg2860□ctg2848□WAG-69N22  
ctg4732□ctg2860□ctg2848□WAG-82H1  
ctg4732□ctg3281□ctg3332□WAG-34C23  
ctg4732□ctg3281□ctg3332□WAG-90G9  
ctg4732□ctg3281□ctg3332□WAG-110L13  
ctg4733□□□WAG-42A21  
ctg4733□ctg233□□□WAG-4I1  
ctg4733□ctg233□□□WAG-11B24  
ctg4733□ctg233□□□WAG-12B24  
ctg4733□ctg233□□□WAG-40G12  
ctg4733□ctg233□ctg402□WAG-1F17  
ctg4733□ctg233□ctg402□WAG-18D2  
ctg4733□ctg233□ctg402□WAG-37I18  
ctg4733□ctg233□ctg402□WAG-52A21  
ctg4733□ctg233□ctg402□WAG-56H5  
ctg4733□ctg233□ctg402□WAG-61F21  
ctg4733□ctg233□ctg402□WAG-69H11  
ctg4733□ctg233□ctg402□WAG-73E5  
ctg4733□ctg233□ctg402□WAG-93L22  
ctg4733□ctg233□ctg402□WAG-96F8  
ctg4733□ctg233□ctg402□WAG-102P9  
ctg4733□ctg233□ctg402□WAG-123C9  
ctg4733□ctg233□ctg402□WAG-128K12  
ctg4733□ctg233□ctg4296□WAG-77K12  
ctg4733□ctg233□ctg4296□WAG-109L17  
ctg4733□ctg233□ctg6459□WAG-83E5  
ctg4733□ctg233□ctg6459□WAG-95O2  
ctg4734□□□WAG-13M5  
ctg4734□ctg1654□ctg1508□WAG-24F1  
ctg4734□ctg1654□ctg1508□WAG-44K10  
ctg4734□ctg1654□ctg1508□WAG-87G6  
ctg4734□ctg1654□ctg1508□WAG-96K1  
ctg4734□ctg1654□ctg1508□WAG-104C22  
ctg4734□ctg1654□ctg1508□WAG-119N22  
ctg4734□ctg1654□ctg1860□WAG-44P23  
ctg4734□ctg1654□ctg1860□WAG-65F13  
ctg4734□ctg1654□ctg1860□WAG-117E4  
ctg4734□ctg1654□ctg1860□WAG-123O5

ctg4734□ctg3495□□WAG-103H1  
ctg4734□ctg3495□ctg4757□WAG-47L3  
ctg4734□ctg3495□ctg4757□WAG-62E17  
ctg4734□ctg5130□ctg5762□WAG-22B17  
ctg4734□ctg5130□ctg5762□WAG-43I22  
ctg4735□□□WAG-33B9  
ctg4735□□□WAG-53I8  
ctg4735□□□WAG-61J18  
ctg4735□□□WAG-118K5  
ctg4735□ctg239□□WAG-62E13  
ctg4735□ctg239□ctg229□WAG-15J9  
ctg4735□ctg239□ctg229□WAG-22F13  
ctg4735□ctg239□ctg229□WAG-42I22  
ctg4735□ctg239□ctg229□WAG-76D20  
ctg4735□ctg239□ctg229□WAG-77J2  
ctg4735□ctg239□ctg229□WAG-79O18  
ctg4735□ctg239□ctg229□WAG-86M20  
ctg4735□ctg239□ctg229□WAG-102D7  
ctg4735□ctg239□ctg229□WAG-106I24  
ctg4735□ctg433□□WAG-36D11  
ctg4735□ctg433□ctg437□WAG-17A7  
ctg4735□ctg433□ctg437□WAG-17B2  
ctg4735□ctg433□ctg437□WAG-20I19  
ctg4735□ctg433□ctg437□WAG-38K10  
ctg4735□ctg433□ctg437□WAG-39A22  
ctg4735□ctg433□ctg437□WAG-40M12  
ctg4735□ctg433□ctg437□WAG-60A17  
ctg4735□ctg433□ctg437□WAG-60E21  
ctg4735□ctg433□ctg437□WAG-62N4  
ctg4735□ctg433□ctg437□WAG-65N12  
ctg4735□ctg433□ctg437□WAG-97B8  
ctg4735□ctg433□ctg437□WAG-111D12  
ctg4735□ctg433□ctg909□WAG-30A7  
ctg4735□ctg433□ctg909□WAG-48B19  
ctg4735□ctg433□ctg909□WAG-68D9  
ctg4735□ctg433□ctg909□WAG-71I7  
ctg4735□ctg433□ctg909□WAG-73I10  
ctg4735□ctg433□ctg909□WAG-80K9  
ctg4735□ctg433□ctg909□WAG-97G9  
ctg4735□ctg504□□WAG-27C15  
ctg4735□ctg504□ctg414□WAG-9L1  
ctg4735□ctg504□ctg414□WAG-12G10  
ctg4735□ctg504□ctg414□WAG-20C14  
ctg4735□ctg504□ctg414□WAG-44P21  
ctg4735□ctg504□ctg414□WAG-49D7  
ctg4735□ctg504□ctg414□WAG-52M10  
ctg4735□ctg504□ctg414□WAG-87H3  
ctg4735□ctg504□ctg414□WAG-120O2  
ctg4735□ctg66□□WAG-110M3  
ctg4735□ctg66□ctg647□WAG-26J19  
ctg4735□ctg66□ctg647□WAG-39D20  
ctg4735□ctg66□ctg647□WAG-59D3  
ctg4735□ctg66□ctg647□WAG-81O7  
ctg4735□ctg66□ctg647□WAG-118C21  
ctg4735□ctg66□ctg647□WAG-122N16  
ctg4735□ctg66□ctg647□WAG-129J1

ctg4735□ctg66□ctg99□WAG-23G24  
ctg4735□ctg66□ctg99□WAG-28A9  
ctg4735□ctg66□ctg99□WAG-30J15  
ctg4735□ctg66□ctg99□WAG-33A12  
ctg4735□ctg66□ctg99□WAG-43O7  
ctg4735□ctg66□ctg99□WAG-57B2  
ctg4735□ctg66□ctg99□WAG-66C19  
ctg4735□ctg66□ctg99□WAG-76N15  
ctg4735□ctg66□ctg99□WAG-81L7  
ctg4735□ctg66□ctg99□WAG-94F22  
ctg4735□ctg66□ctg99□WAG-103L6  
ctg4735□ctg66□ctg99□WAG-116A7  
ctg4735□ctg66□ctg99□WAG-128D7  
ctg4735□ctg66□ctg99□WAG-130L7  
ctg4736□□□WAG-98K24  
ctg4736□ctg2713□□WAG-51D10  
ctg4736□ctg2713□ctg3444□WAG-57L18  
ctg4736□ctg2713□ctg3444□WAG-126J7  
ctg4736□ctg2713□ctg4273□WAG-56I17  
ctg4736□ctg2713□ctg4273□WAG-90D22  
ctg4736□ctg2713□ctg4273□WAG-114C2  
ctg4737□□□WAG-3K13  
ctg4737□□□WAG-41D19  
ctg4737□□□WAG-48B6  
ctg4737□ctg1320□□WAG-10G16  
ctg4737□ctg1320□□WAG-18J20  
ctg4737□ctg1320□□WAG-75H2  
ctg4737□ctg1320□□WAG-89C22  
ctg4737□ctg1320□ctg1717□WAG-9I5  
ctg4737□ctg1320□ctg1717□WAG-25O20  
ctg4737□ctg1320□ctg1717□WAG-35P21  
ctg4737□ctg1320□ctg1717□WAG-49A13  
ctg4737□ctg1320□ctg1717□WAG-76H16  
ctg4737□ctg1320□ctg1717□WAG-77B8  
ctg4737□ctg1320□ctg1717□WAG-85B4  
ctg4737□ctg1320□ctg1717□WAG-97M16  
ctg4737□ctg1320□ctg1717□WAG-112G20  
ctg4737□ctg1320□ctg1717□WAG-123D9  
ctg4737□ctg1320□ctg5853□WAG-19L9  
ctg4737□ctg1320□ctg5853□WAG-81H5  
ctg4737□ctg2604□ctg2570□WAG-24K15  
ctg4737□ctg2604□ctg2570□WAG-65G21  
ctg4737□ctg2604□ctg2570□WAG-88I17  
ctg4738□□□WAG-5A6  
ctg4738□□□WAG-59P9  
ctg4738□□□WAG-63L1  
ctg4738□□□WAG-97B17  
ctg4738□ctg1669□ctg1522□WAG-12F22  
ctg4738□ctg1669□ctg1522□WAG-30F3  
ctg4738□ctg1669□ctg1522□WAG-39J18  
ctg4738□ctg1669□ctg1522□WAG-45A12  
ctg4738□ctg1669□ctg3908□WAG-50P23  
ctg4738□ctg1669□ctg3908□WAG-74H11  
ctg4738□ctg4352□□WAG-111G7  
ctg4738□ctg4352□ctg6405□WAG-25L1  
ctg4738□ctg4352□ctg6405□WAG-69I16

ctg4738□ctg5483□ctg6570□WAG-6B2  
ctg4738□ctg5483□ctg6570□WAG-52F1  
ctg4738□ctg5730□□WAG-21L3  
ctg4738□ctg5730□□WAG-66C17  
ctg4738□ctg6016□□WAG-108I8  
ctg4738□ctg6016□□WAG-130I24  
ctg4738□ctg619□ctg2043□WAG-48M20  
ctg4738□ctg619□ctg2043□WAG-110P14  
ctg4738□ctg619□ctg2043□WAG-122J21  
ctg4738□ctg619□ctg648□WAG-10E9  
ctg4738□ctg619□ctg648□WAG-65L24  
ctg4738□ctg619□ctg648□WAG-68O13  
ctg4738□ctg619□ctg648□WAG-75C1  
ctg4738□ctg619□ctg648□WAG-111P11  
ctg4739□□□WAG-17K9  
ctg4739□□□WAG-70A11  
ctg4739□□□WAG-107I22  
ctg4739□ctg2179□□WAG-25L17  
ctg4739□ctg2179□ctg2606□WAG-3M12  
ctg4739□ctg2179□ctg2606□WAG-12P1  
ctg4739□ctg2179□ctg2606□WAG-65F14  
ctg4739□ctg2179□ctg2606□WAG-86B24  
ctg4739□ctg2179□ctg2606□WAG-107D19  
ctg4739□ctg2199□ctg2071□WAG-11M16  
ctg4739□ctg2199□ctg2071□WAG-40J17  
ctg4739□ctg2199□ctg2071□WAG-67E16  
ctg4739□ctg2199□ctg2071□WAG-70M21  
ctg4739□ctg2199□ctg2071□WAG-101B23  
ctg474□ctg1077□ctg1256□WAG-8A9  
ctg474□ctg1077□ctg1256□WAG-25O18  
ctg474□ctg1077□ctg1256□WAG-39O18  
ctg474□ctg1077□ctg1256□WAG-52K11  
ctg474□ctg1077□ctg1256□WAG-104H12  
ctg474□ctg1077□ctg1256□WAG-107N2  
ctg4740□ctg5638□□WAG-86D10  
ctg4740□ctg5638□□WAG-100I12  
ctg4741□□□WAG-54M3  
ctg4741□□□WAG-119N16  
ctg4741□ctg693□□WAG-54C11  
ctg4741□ctg693□ctg713□WAG-3G14  
ctg4741□ctg693□ctg713□WAG-29G12  
ctg4741□ctg693□ctg713□WAG-34F15  
ctg4741□ctg693□ctg713□WAG-86F15  
ctg4741□ctg693□ctg713□WAG-107B21  
ctg4741□ctg693□ctg713□WAG-120N21  
ctg4742□□□WAG-62C17  
ctg4742□ctg4418□□WAG-112L6  
ctg4742□ctg4418□ctg6719□WAG-3J14  
ctg4742□ctg4418□ctg6719□WAG-114C17  
ctg4742□ctg99□□WAG-109J10  
ctg4742□ctg99□□WAG-109N9  
ctg4742□ctg99□ctg114□WAG-9F23  
ctg4742□ctg99□ctg114□WAG-14L2  
ctg4742□ctg99□ctg114□WAG-19N15  
ctg4742□ctg99□ctg114□WAG-35K6  
ctg4742□ctg99□ctg114□WAG-47E13

ctg4742□ctg99□ctg114□WAG-47P7  
ctg4742□ctg99□ctg114□WAG-53P1  
ctg4742□ctg99□ctg114□WAG-60B17  
ctg4742□ctg99□ctg114□WAG-63G24  
ctg4742□ctg99□ctg114□WAG-65H24  
ctg4742□ctg99□ctg114□WAG-65N11  
ctg4742□ctg99□ctg114□WAG-77E15  
ctg4742□ctg99□ctg114□WAG-97K23  
ctg4742□ctg99□ctg114□WAG-110D11  
ctg4742□ctg99□ctg114□WAG-116G8  
ctg4742□ctg99□ctg114□WAG-126B19  
ctg4742□ctg99□ctg114□WAG-127F24  
ctg4743□□□WAG-127D10  
ctg4743□ctg266□□WAG-95H13  
ctg4743□ctg266□ctg349□WAG-55C22  
ctg4743□ctg266□ctg349□WAG-56P11  
ctg4743□ctg266□ctg349□WAG-69E2  
ctg4743□ctg266□ctg349□WAG-75D3  
ctg4743□ctg266□ctg349□WAG-79D5  
ctg4743□ctg266□ctg349□WAG-85N19  
ctg4743□ctg266□ctg349□WAG-94B24  
ctg4743□ctg266□ctg349□WAG-105I20  
ctg4743□ctg266□ctg349□WAG-119B11  
ctg4743□ctg3454□ctg3570□WAG-12A19  
ctg4743□ctg3454□ctg3570□WAG-34B10  
ctg4743□ctg3454□ctg3570□WAG-55D11  
ctg4743□ctg3454□ctg3570□WAG-64M11  
ctg4744□□□WAG-96A2  
ctg4744□□□WAG-105P21  
ctg4744□□□WAG-125M22  
ctg4744□ctg2131□□WAG-10C24  
ctg4744□ctg2131□ctg2706□WAG-18J2  
ctg4744□ctg2131□ctg2706□WAG-53B10  
ctg4744□ctg2131□ctg2706□WAG-64D4  
ctg4744□ctg3117□□WAG-44C24  
ctg4744□ctg3117□ctg3745□WAG-94A11  
ctg4744□ctg3117□ctg3745□WAG-109I19  
ctg4744□ctg3117□ctg3745□WAG-116D7  
ctg4744□ctg3117□ctg3745□WAG-125M20  
ctg4744□ctg853□□WAG-14D4  
ctg4744□ctg853□□WAG-39A14  
ctg4744□ctg853□ctg920□WAG-24A16  
ctg4744□ctg853□ctg920□WAG-35C10  
ctg4744□ctg853□ctg920□WAG-38F19  
ctg4744□ctg853□ctg920□WAG-46E13  
ctg4744□ctg853□ctg920□WAG-51H10  
ctg4744□ctg853□ctg920□WAG-54D5  
ctg4744□ctg853□ctg920□WAG-69C14  
ctg4744□ctg853□ctg920□WAG-87N18  
ctg4744□ctg853□ctg920□WAG-112N6  
ctg4744□ctg853□ctg920□WAG-115J22  
ctg4744□ctg853□ctg920□WAG-129I10  
ctg4745□□□WAG-34N23  
ctg4745□ctg1123□□WAG-104K5  
ctg4745□ctg1123□ctg3043□WAG-66F17  
ctg4745□ctg1123□ctg3043□WAG-66N13

ctg4745□ctg1123□ctg3043□WAG-89P5  
ctg4745□ctg1123□ctg3043□WAG-90G13  
ctg4745□ctg1123□ctg3043□WAG-108L14  
ctg4745□ctg1123□ctg6411□WAG-4M24  
ctg4745□ctg1123□ctg6411□WAG-59B16  
ctg4745□ctg1123□ctg960□WAG-23I14  
ctg4745□ctg1123□ctg960□WAG-40D18  
ctg4745□ctg1123□ctg960□WAG-56K12  
ctg4745□ctg1123□ctg960□WAG-58K21  
ctg4745□ctg1123□ctg960□WAG-60L15  
ctg4745□ctg1123□ctg960□WAG-100E15  
ctg4745□ctg1123□ctg960□WAG-102H10  
ctg4745□ctg1123□ctg960□WAG-107P4  
ctg4745□ctg1123□ctg960□WAG-109J14  
ctg4745□ctg1123□ctg960□WAG-122D14  
ctg4745□ctg1549□□WAG-100L12  
ctg4745□ctg1549□□WAG-107E12  
ctg4745□ctg1549□ctg2824□WAG-1O22  
ctg4745□ctg1549□ctg2824□WAG-3B8  
ctg4745□ctg1549□ctg2824□WAG-65F18  
ctg4745□ctg1549□ctg2824□WAG-88E4  
ctg4745□ctg1549□ctg6436□WAG-12I22  
ctg4745□ctg1549□ctg6436□WAG-79P13  
ctg4746□ctg2444□ctg2354□WAG-20K16  
ctg4746□ctg2444□ctg2354□WAG-43K22  
ctg4746□ctg2444□ctg2354□WAG-62F13  
ctg4746□ctg2444□ctg2354□WAG-78D7  
ctg4746□ctg4804□ctg5048□WAG-37G19  
ctg4746□ctg4804□ctg5048□WAG-94I22  
ctg4747□□□WAG-16C23  
ctg4747□ctg3361□□WAG-5M3  
ctg4747□ctg3361□ctg4374□WAG-35D4  
ctg4747□ctg3361□ctg4374□WAG-63N18  
ctg4748□□□WAG-111L1  
ctg4748□ctg3165□□WAG-10F3  
ctg4748□ctg3165□ctg4191□WAG-25I5  
ctg4748□ctg3165□ctg4191□WAG-35P14  
ctg4748□ctg3165□ctg4191□WAG-94P8  
ctg4748□ctg3165□ctg6332□WAG-2F14  
ctg4748□ctg3165□ctg6332□WAG-49E5  
ctg4749□ctg1627□□WAG-68D23  
ctg4749□ctg1627□ctg1951□WAG-26A17  
ctg4749□ctg1627□ctg1951□WAG-60K12  
ctg4749□ctg1627□ctg1951□WAG-90G5  
ctg4749□ctg1627□ctg1951□WAG-117A19  
ctg4749□ctg1627□ctg1951□WAG-127B17  
ctg475□ctg1080□□WAG-52G24  
ctg475□ctg1080□ctg1393□WAG-59G1  
ctg475□ctg1080□ctg1393□WAG-81A16  
ctg475□ctg1080□ctg1393□WAG-81C15  
ctg475□ctg1080□ctg1393□WAG-87D17  
ctg475□ctg1080□ctg1393□WAG-89C14  
ctg4750□ctg2884□ctg2876□WAG-11F21  
ctg4750□ctg2884□ctg2876□WAG-29A6  
ctg4750□ctg2884□ctg2876□WAG-94L2  
ctg4750□ctg2884□ctg2876□WAG-102F1

ctg4751□□□WAG-35N1  
ctg4751□□□WAG-66P19  
ctg4751□ctg803□□WAG-21O24  
ctg4751□ctg803□ctg2558□WAG-37I15  
ctg4751□ctg803□ctg2558□WAG-49E10  
ctg4751□ctg803□ctg2558□WAG-75K16  
ctg4751□ctg803□ctg661□WAG-12E8  
ctg4751□ctg803□ctg661□WAG-14E16  
ctg4751□ctg803□ctg661□WAG-23H11  
ctg4751□ctg803□ctg661□WAG-57G7  
ctg4751□ctg803□ctg661□WAG-79J16  
ctg4751□ctg803□ctg661□WAG-119E8  
ctg4752□□□WAG-16G20  
ctg4752□□□WAG-111D7  
ctg4752□ctg2433□ctg2340□WAG-17L18  
ctg4752□ctg2433□ctg2340□WAG-58F3  
ctg4752□ctg2433□ctg2340□WAG-112N3  
ctg4752□ctg2433□ctg5020□WAG-21N10  
ctg4752□ctg2433□ctg5020□WAG-42G9  
ctg4752□ctg455□□WAG-70D10  
ctg4752□ctg455□ctg1742□WAG-51J24  
ctg4752□ctg455□ctg1742□WAG-68C24  
ctg4752□ctg455□ctg1742□WAG-76L11  
ctg4752□ctg455□ctg1742□WAG-89F2  
ctg4752□ctg455□ctg465□WAG-43A17  
ctg4752□ctg455□ctg465□WAG-43O23  
ctg4752□ctg455□ctg465□WAG-54L19  
ctg4752□ctg455□ctg465□WAG-66H18  
ctg4752□ctg455□ctg465□WAG-90L5  
ctg4752□ctg455□ctg465□WAG-119N24  
ctg4753□□□WAG-46G8  
ctg4753□ctg1670□□WAG-107N6  
ctg4753□ctg1670□ctg2475□WAG-32H9  
ctg4753□ctg1670□ctg2475□WAG-44I19  
ctg4753□ctg1670□ctg2475□WAG-75P16  
ctg4753□ctg1670□ctg2475□WAG-98K4  
ctg4753□ctg1670□ctg2475□WAG-113L23  
ctg4753□ctg1670□ctg3040□WAG-85I22  
ctg4753□ctg1670□ctg3040□WAG-110B14  
ctg4753□ctg1670□ctg3040□WAG-116F23  
ctg4753□ctg1670□ctg4781□WAG-17E5  
ctg4753□ctg1670□ctg4781□WAG-65I17  
ctg4754□ctg6435□□WAG-6P9  
ctg4754□ctg6435□□WAG-58J5  
ctg4755□□□WAG-41D9  
ctg4755□ctg1031□ctg5989□WAG-108J7  
ctg4755□ctg1031□ctg5989□WAG-117F8  
ctg4755□ctg1031□ctg6177□WAG-45I10  
ctg4755□ctg1031□ctg6177□WAG-117I2  
ctg4755□ctg1031□ctg860□WAG-43A22  
ctg4755□ctg1031□ctg860□WAG-44O9  
ctg4755□ctg1031□ctg860□WAG-73L12  
ctg4755□ctg1031□ctg860□WAG-90L9  
ctg4755□ctg1031□ctg860□WAG-96F3  
ctg4755□ctg4517□ctg4646□WAG-106B24  
ctg4755□ctg4517□ctg4646□WAG-130C24



ctg4756□□□WAG-38C17  
ctg4756□□□WAG-48O21  
ctg4756□ctg2086□□WAG-25A18  
ctg4756□ctg2086□ctg1942□WAG-1J5  
ctg4756□ctg2086□ctg1942□WAG-19H16  
ctg4756□ctg2086□ctg1942□WAG-49H24  
ctg4756□ctg2086□ctg1942□WAG-114D5  
ctg4757□□□WAG-28O15  
ctg4757□□□WAG-75B3  
ctg4757□ctg688□□WAG-38A15  
ctg4757□ctg688□ctg3122□WAG-29O23  
ctg4757□ctg688□ctg3122□WAG-38D19  
ctg4757□ctg688□ctg3122□WAG-73J4  
ctg4757□ctg688□ctg3122□WAG-106P11  
ctg4757□ctg688□ctg3122□WAG-109G1  
ctg4757□ctg688□ctg3122□WAG-127G9  
ctg4757□ctg688□ctg3924□WAG-23M7  
ctg4757□ctg688□ctg3924□WAG-36L8  
ctg4757□ctg688□ctg3924□WAG-85D19  
ctg4757□ctg688□ctg881□WAG-18G14  
ctg4757□ctg688□ctg881□WAG-24L22  
ctg4757□ctg688□ctg881□WAG-25E4  
ctg4757□ctg688□ctg881□WAG-37A6  
ctg4757□ctg688□ctg881□WAG-41O2  
ctg4757□ctg688□ctg881□WAG-59L16  
ctg4757□ctg688□ctg881□WAG-77E9  
ctg4757□ctg688□ctg881□WAG-92I22  
ctg4757□ctg688□ctg881□WAG-120B3  
ctg4757□ctg782□□WAG-8C21  
ctg4757□ctg782□□WAG-9N8  
ctg4757□ctg782□□WAG-13I11  
ctg4757□ctg782□□WAG-64K17  
ctg4757□ctg782□ctg1817□WAG-38E20  
ctg4757□ctg782□ctg1817□WAG-91L10  
ctg4757□ctg782□ctg1817□WAG-93D5  
ctg4757□ctg782□ctg1817□WAG-107P15  
ctg4757□ctg782□ctg1817□WAG-125C19  
ctg4757□ctg782□ctg1817□WAG-128C24  
ctg4758□□□WAG-63B10  
ctg4758□ctg1678□□WAG-63J11  
ctg4758□ctg1678□ctg1952□WAG-33J24  
ctg4758□ctg1678□ctg1952□WAG-67O4  
ctg4758□ctg1678□ctg1952□WAG-90F3  
ctg4758□ctg1678□ctg1952□WAG-90N2  
ctg4758□ctg1678□ctg1952□WAG-105G5  
ctg4758□ctg2919□ctg4717□WAG-32F18  
ctg4758□ctg2919□ctg4717□WAG-61B4  
ctg4758□ctg2919□ctg5733□WAG-40N22  
ctg4758□ctg2919□ctg5733□WAG-102E21  
ctg4759□ctg157□ctg123□WAG-23O18  
ctg4759□ctg157□ctg123□WAG-36O22  
ctg4759□ctg157□ctg123□WAG-39E8  
ctg4759□ctg157□ctg123□WAG-60P24  
ctg4759□ctg157□ctg123□WAG-67F24  
ctg4759□ctg157□ctg123□WAG-74G2  
ctg4759□ctg157□ctg123□WAG-115P4

ctg4759□ctg157□ctg123□WAG-121E23  
ctg4759□ctg157□ctg123□WAG-125K20  
ctg4759□ctg157□ctg123□WAG-128J17  
ctg4759□ctg157□ctg921□WAG-21L10  
ctg4759□ctg157□ctg921□WAG-38C23  
ctg4759□ctg157□ctg921□WAG-81M6  
ctg4759□ctg157□ctg921□WAG-92G5  
ctg4759□ctg157□ctg921□WAG-95K12  
ctg476□ctg1084□ctg926□WAG-71D14  
ctg476□ctg1084□ctg926□WAG-81C13  
ctg476□ctg1084□ctg926□WAG-89E9  
ctg476□ctg1084□ctg926□WAG-90G6  
ctg476□ctg1084□ctg926□WAG-110J4  
ctg476□ctg1084□ctg926□WAG-126I11  
ctg476□ctg5828□□WAG-18M20  
ctg476□ctg5828□□WAG-49I6  
ctg4760□□□WAG-82C20  
ctg4760□ctg1039□ctg870□WAG-70B14  
ctg4760□ctg1039□ctg870□WAG-84K16  
ctg4760□ctg1039□ctg870□WAG-107F14  
ctg4760□ctg1039□ctg870□WAG-121I5  
ctg4760□ctg2027□ctg1877□WAG-44P18  
ctg4760□ctg2027□ctg1877□WAG-68K15  
ctg4760□ctg2027□ctg1877□WAG-76O15  
ctg4760□ctg2027□ctg1877□WAG-79K2  
ctg4761□□□WAG-42F3  
ctg4761□ctg1591□□WAG-107O1  
ctg4761□ctg1591□ctg1436□WAG-42J13  
ctg4761□ctg1591□ctg1436□WAG-75E23  
ctg4761□ctg1591□ctg1436□WAG-111M1  
ctg4761□ctg1591□ctg1436□WAG-130K16  
ctg4761□ctg1591□ctg6384□WAG-6E23  
ctg4761□ctg1591□ctg6384□WAG-93D18  
ctg4761□ctg486□□WAG-32N7  
ctg4761□ctg486□□WAG-51A21  
ctg4761□ctg486□□WAG-96J24  
ctg4761□ctg486□ctg1333□WAG-9E4  
ctg4761□ctg486□ctg1333□WAG-26O11  
ctg4761□ctg486□ctg1333□WAG-77H20  
ctg4761□ctg486□ctg1333□WAG-108I20  
ctg4761□ctg486□ctg1333□WAG-110P6  
ctg4761□ctg486□ctg3526□WAG-38E24  
ctg4761□ctg486□ctg3526□WAG-44A20  
ctg4761□ctg486□ctg3526□WAG-66K6  
ctg4761□ctg486□ctg3526□WAG-92I17  
ctg4761□ctg486□ctg3526□WAG-101C13  
ctg4761□ctg486□ctg3526□WAG-120D17  
ctg4761□ctg486□ctg517□WAG-20H16  
ctg4761□ctg486□ctg517□WAG-22I16  
ctg4761□ctg486□ctg517□WAG-39B21  
ctg4761□ctg486□ctg517□WAG-69G14  
ctg4761□ctg486□ctg517□WAG-79D24  
ctg4761□ctg486□ctg517□WAG-97A14  
ctg4761□ctg486□ctg517□WAG-116C22  
ctg4761□ctg486□ctg517□WAG-119I21  
ctg4761□ctg486□ctg6669□WAG-8D7

ctg4761□ctg486□ctg6669□WAG-54O15  
ctg4762□□□WAG-28I19  
ctg4762□□□WAG-49C16  
ctg4762□□□WAG-100J22  
ctg4762□□□WAG-111F2  
ctg4762□□□WAG-119J2  
ctg4762□ctg2737□ctg2716□WAG-15I21  
ctg4762□ctg2737□ctg2716□WAG-58I19  
ctg4762□ctg2737□ctg2716□WAG-101I1  
ctg4762□ctg2737□ctg2716□WAG-126G2  
ctg4762□ctg4204□□WAG-42K22  
ctg4762□ctg4204□ctg6608□WAG-14E20  
ctg4762□ctg4204□ctg6608□WAG-105J3  
ctg4762□ctg838□□WAG-28J6  
ctg4762□ctg838□□WAG-36D15  
ctg4762□ctg838□ctg3347□WAG-4P7  
ctg4762□ctg838□ctg3347□WAG-24E20  
ctg4762□ctg838□ctg3347□WAG-34A2  
ctg4762□ctg838□ctg3347□WAG-105D22  
ctg4762□ctg838□ctg894□WAG-29C23  
ctg4762□ctg838□ctg894□WAG-47E23  
ctg4762□ctg838□ctg894□WAG-64K11  
ctg4762□ctg838□ctg894□WAG-88K16  
ctg4763□ctg4813□ctg5067□WAG-57J3  
ctg4763□ctg4813□ctg5067□WAG-78P11  
ctg4764□ctg3257□□WAG-41G21  
ctg4764□ctg3257□ctg4303□WAG-46H15  
ctg4764□ctg3257□ctg4303□WAG-49L16  
ctg4764□ctg3257□ctg4303□WAG-81H10  
ctg4764□ctg3257□ctg6385□WAG-21O19  
ctg4764□ctg3257□ctg6385□WAG-91L12  
ctg4764□ctg379□□WAG-11N23  
ctg4764□ctg379□□WAG-40A3  
ctg4764□ctg379□□WAG-93A23  
ctg4764□ctg379□□WAG-124C4  
ctg4764□ctg379□□WAG-124L8  
ctg4764□ctg379□ctg2246□WAG-1C4  
ctg4764□ctg379□ctg2246□WAG-50F17  
ctg4764□ctg379□ctg2246□WAG-58P19  
ctg4764□ctg379□ctg2246□WAG-103N22  
ctg4764□ctg379□ctg2246□WAG-106E16  
ctg4764□ctg379□ctg472□WAG-8H19  
ctg4764□ctg379□ctg472□WAG-12I18  
ctg4764□ctg379□ctg472□WAG-36A24  
ctg4764□ctg379□ctg472□WAG-71F22  
ctg4764□ctg379□ctg472□WAG-90I15  
ctg4764□ctg379□ctg472□WAG-120L21  
ctg4764□ctg379□ctg472□WAG-121J8  
ctg4765□ctg5885□□WAG-11A13  
ctg4765□ctg5885□□WAG-40G13  
ctg4765□ctg840□□WAG-104L9  
ctg4765□ctg840□ctg1502□WAG-3E19  
ctg4765□ctg840□ctg1502□WAG-36E4  
ctg4765□ctg840□ctg1502□WAG-98P12  
ctg4765□ctg840□ctg1502□WAG-101H15  
ctg4765□ctg840□ctg1502□WAG-125B10

ctg4765□ctg840□ctg4022□WAG-36A6  
ctg4765□ctg840□ctg4022□WAG-58C23  
ctg4765□ctg840□ctg4022□WAG-71B9  
ctg4765□ctg840□ctg4022□WAG-95L17  
ctg4765□ctg840□ctg6741□WAG-39K24  
ctg4765□ctg840□ctg6741□WAG-80E22  
ctg4766□ctg6240□□WAG-57M22  
ctg4766□ctg6240□□WAG-72A15  
ctg4767□□□WAG-94C1  
ctg4767□ctg3910□ctg4194□WAG-3L21  
ctg4767□ctg3910□ctg4194□WAG-44F6  
ctg4767□ctg3910□ctg4194□WAG-62O6  
ctg4767□ctg3910□ctg4194□WAG-71N14  
ctg4767□ctg579□□WAG-22L4  
ctg4767□ctg579□□WAG-100B2  
ctg4767□ctg579□ctg602□WAG-11J18  
ctg4767□ctg579□ctg602□WAG-46G18  
ctg4767□ctg579□ctg602□WAG-82L12  
ctg4767□ctg579□ctg602□WAG-95C12  
ctg4767□ctg579□ctg602□WAG-104H22  
ctg4767□ctg579□ctg602□WAG-106D20  
ctg4767□ctg579□ctg602□WAG-123C3  
ctg4767□ctg763□□WAG-1L17  
ctg4767□ctg763□□WAG-81F10  
ctg4767□ctg763□ctg778□WAG-6P17  
ctg4767□ctg763□ctg778□WAG-75B5  
ctg4767□ctg763□ctg778□WAG-88H20  
ctg4767□ctg763□ctg778□WAG-116H6  
ctg4767□ctg763□ctg778□WAG-117H14  
ctg4767□ctg763□ctg778□WAG-119H10  
ctg4768□□□WAG-90O4  
ctg4768□ctg345□□WAG-63B24  
ctg4768□ctg345□ctg2515□WAG-44L6  
ctg4768□ctg345□ctg2515□WAG-74E14  
ctg4768□ctg345□ctg2515□WAG-98L7  
ctg4768□ctg345□ctg703□WAG-11O19  
ctg4768□ctg345□ctg703□WAG-18M21  
ctg4768□ctg345□ctg703□WAG-46D2  
ctg4768□ctg345□ctg703□WAG-50K20  
ctg4768□ctg345□ctg703□WAG-51D22  
ctg4768□ctg345□ctg703□WAG-55P10  
ctg4768□ctg345□ctg703□WAG-72B6  
ctg4768□ctg345□ctg703□WAG-79D20  
ctg4768□ctg345□ctg703□WAG-83L4  
ctg4768□ctg345□ctg703□WAG-87J24  
ctg4768□ctg345□ctg703□WAG-88N10  
ctg4768□ctg345□ctg703□WAG-90D12  
ctg4768□ctg345□ctg703□WAG-94M1  
ctg4768□ctg345□ctg703□WAG-103H11  
ctg4768□ctg345□ctg703□WAG-113F22  
ctg4768□ctg345□ctg703□WAG-113P18  
ctg4768□ctg345□ctg703□WAG-127M14  
ctg4768□ctg4309□ctg4500□WAG-68N17  
ctg4768□ctg4309□ctg4500□WAG-87H20  
ctg4769□□□WAG-39D13  
ctg4769□□□WAG-96L23

ctg4769□ctg1535□ctg1827□WAG-42N17  
ctg4769□ctg1535□ctg1827□WAG-62H9  
ctg4769□ctg1535□ctg1827□WAG-64N13  
ctg4769□ctg1535□ctg1827□WAG-66B4  
ctg4769□ctg1535□ctg1827□WAG-106C10  
ctg4769□ctg412□ctg1345□WAG-69C6  
ctg4769□ctg412□ctg1345□WAG-77E19  
ctg4769□ctg412□ctg1345□WAG-97I24  
ctg4769□ctg412□ctg1345□WAG-98G15  
ctg4769□ctg412□ctg1345□WAG-106D9  
ctg4769□ctg412□ctg1345□WAG-106F6  
ctg4769□ctg412□ctg433□WAG-18H13  
ctg4769□ctg412□ctg433□WAG-19L21  
ctg4769□ctg412□ctg433□WAG-29C8  
ctg4769□ctg412□ctg433□WAG-58A12  
ctg4769□ctg412□ctg433□WAG-62O1  
ctg4769□ctg412□ctg433□WAG-68L21  
ctg4769□ctg412□ctg433□WAG-80G4  
ctg4769□ctg412□ctg433□WAG-129D2  
ctg477□ctg1532□□WAG-82C15  
ctg477□ctg1532□ctg1872□WAG-36G1  
ctg477□ctg1532□ctg1872□WAG-43D18  
ctg477□ctg1532□ctg1872□WAG-64J14  
ctg477□ctg1532□ctg1872□WAG-98M21  
ctg477□ctg1532□ctg1872□WAG-115C10  
ctg477□ctg1532□ctg2432□WAG-11F18  
ctg477□ctg1532□ctg2432□WAG-100C4  
ctg477□ctg1532□ctg2432□WAG-104C1  
ctg477□ctg1532□ctg2907□WAG-37N16  
ctg477□ctg1532□ctg2907□WAG-46L16  
ctg477□ctg1532□ctg2907□WAG-77O12  
ctg477□ctg1532□ctg2907□WAG-92D13  
ctg477□ctg1532□ctg3528□WAG-15I22  
ctg477□ctg1532□ctg3528□WAG-96O6  
ctg477□ctg1532□ctg3528□WAG-123D21  
ctg4770□□□WAG-21J22  
ctg4770□□□WAG-90C8  
ctg4770□ctg108□□WAG-7D6  
ctg4770□ctg108□□WAG-16F14  
ctg4770□ctg108□□WAG-48M5  
ctg4770□ctg108□ctg156□WAG-3C19  
ctg4770□ctg108□ctg156□WAG-20C24  
ctg4770□ctg108□ctg156□WAG-27F19  
ctg4770□ctg108□ctg156□WAG-63I11  
ctg4770□ctg108□ctg156□WAG-70C6  
ctg4770□ctg108□ctg156□WAG-78B9  
ctg4770□ctg108□ctg156□WAG-91L19  
ctg4770□ctg108□ctg156□WAG-95G9  
ctg4770□ctg108□ctg156□WAG-109E15  
ctg4770□ctg108□ctg156□WAG-113N10  
ctg4770□ctg108□ctg156□WAG-114D24  
ctg4770□ctg108□ctg156□WAG-130J12  
ctg4770□ctg1218□ctg1419□WAG-13K16  
ctg4770□ctg1218□ctg1419□WAG-53D23  
ctg4770□ctg1218□ctg1419□WAG-59J17  
ctg4770□ctg1218□ctg1419□WAG-77L2

ctg4770□ctg1218□ctg1419□WAG-104J24  
ctg4770□ctg1218□ctg1419□WAG-114N7  
ctg4770□ctg1218□ctg1419□WAG-123B21  
ctg4771□□□WAG-42L16  
ctg4771□ctg188□ctg249□WAG-8C11  
ctg4771□ctg188□ctg249□WAG-11B14  
ctg4771□ctg188□ctg249□WAG-17G17  
ctg4771□ctg188□ctg249□WAG-18L7  
ctg4771□ctg188□ctg249□WAG-29E6  
ctg4771□ctg188□ctg249□WAG-35K16  
ctg4771□ctg188□ctg249□WAG-42C13  
ctg4771□ctg188□ctg249□WAG-42K2  
ctg4771□ctg188□ctg249□WAG-47K12  
ctg4771□ctg188□ctg249□WAG-48G1  
ctg4771□ctg188□ctg249□WAG-48M14  
ctg4771□ctg188□ctg249□WAG-50M5  
ctg4771□ctg188□ctg249□WAG-55I3  
ctg4771□ctg188□ctg249□WAG-55M16  
ctg4771□ctg188□ctg249□WAG-64E3  
ctg4771□ctg188□ctg249□WAG-74O5  
ctg4771□ctg188□ctg249□WAG-81E12  
ctg4771□ctg188□ctg249□WAG-101M5  
ctg4771□ctg188□ctg249□WAG-103E16  
ctg4771□ctg188□ctg249□WAG-122F2  
ctg4771□ctg188□ctg4953□WAG-16E9  
ctg4771□ctg188□ctg4953□WAG-124E10  
ctg4772□ctg3216□ctg3245□WAG-O3  
ctg4772□ctg3216□ctg3245□WAG-54I5  
ctg4773□□□WAG-22E11  
ctg4773□□□WAG-59E15  
ctg4773□□□WAG-67G21  
ctg4773□□□WAG-101E10  
ctg4773□ctg156□□WAG-22E9  
ctg4773□ctg156□□WAG-108N10  
ctg4773□ctg156□ctg119□WAG-24G2  
ctg4773□ctg156□ctg119□WAG-55E15  
ctg4773□ctg156□ctg119□WAG-68D7  
ctg4773□ctg156□ctg119□WAG-74G13  
ctg4773□ctg156□ctg119□WAG-75K20  
ctg4773□ctg156□ctg119□WAG-109K12  
ctg4773□ctg156□ctg119□WAG-125M5  
ctg4773□ctg156□ctg119□WAG-126M13  
ctg4773□ctg156□ctg1911□WAG-41P23  
ctg4773□ctg156□ctg1911□WAG-52N21  
ctg4773□ctg156□ctg1911□WAG-124K9  
ctg4773□ctg156□ctg1911□WAG-127M16  
ctg4773□ctg1831□□WAG-50A18  
ctg4773□ctg1831□□WAG-121D23  
ctg4773□ctg1831□ctg2155□WAG-28G5  
ctg4773□ctg1831□ctg2155□WAG-42P9  
ctg4773□ctg1831□ctg2155□WAG-43D14  
ctg4773□ctg1831□ctg2155□WAG-119F19  
ctg4773□ctg1831□ctg2155□WAG-124G11  
ctg4773□ctg2668□□WAG-14G5  
ctg4773□ctg2668□ctg3369□WAG-81D4  
ctg4773□ctg2668□ctg3369□WAG-88H17

ctg4773□ctg2668□ctg3369□WAG-127A8  
ctg4773□ctg4982□ctg5415□WAG-15O16  
ctg4773□ctg4982□ctg5415□WAG-40J14  
ctg4773□ctg839□ctg4603□WAG-25I12  
ctg4773□ctg839□ctg4603□WAG-108J20  
ctg4773□ctg839□ctg856□WAG-33K16  
ctg4773□ctg839□ctg856□WAG-35I11  
ctg4773□ctg839□ctg856□WAG-54M12  
ctg4773□ctg839□ctg856□WAG-63M21  
ctg4773□ctg839□ctg856□WAG-69M4  
ctg4773□ctg839□ctg856□WAG-80H8  
ctg4773□ctg839□ctg856□WAG-90K19  
ctg4773□ctg839□ctg856□WAG-103P15  
ctg4773□ctg839□ctg856□WAG-127P17  
ctg4773□ctg96□ctg69□WAG-9L11  
ctg4773□ctg96□ctg69□WAG-18E5  
ctg4773□ctg96□ctg69□WAG-19H10  
ctg4773□ctg96□ctg69□WAG-22K8  
ctg4773□ctg96□ctg69□WAG-25F21  
ctg4773□ctg96□ctg69□WAG-32H20  
ctg4773□ctg96□ctg69□WAG-34J8  
ctg4773□ctg96□ctg69□WAG-36H19  
ctg4773□ctg96□ctg69□WAG-38F2  
ctg4773□ctg96□ctg69□WAG-47J9  
ctg4773□ctg96□ctg69□WAG-55A1  
ctg4773□ctg96□ctg69□WAG-69P18  
ctg4773□ctg96□ctg69□WAG-88N15  
ctg4773□ctg96□ctg69□WAG-89B17  
ctg4773□ctg96□ctg69□WAG-95I19  
ctg4773□ctg96□ctg69□WAG-99J9  
ctg4773□ctg96□ctg69□WAG-103G9  
ctg4773□ctg96□ctg69□WAG-108M11  
ctg4773□ctg96□ctg69□WAG-110H12  
ctg4773□ctg96□ctg69□WAG-114B9  
ctg4773□ctg96□ctg69□WAG-117O24  
ctg4773□ctg96□ctg69□WAG-121C7  
ctg4773□ctg96□ctg69□WAG-129B17  
ctg4773□ctg971□□WAG-56P20  
ctg4773□ctg971□ctg2440□WAG-8I21  
ctg4773□ctg971□ctg2440□WAG-43G7  
ctg4773□ctg971□ctg2440□WAG-78I8  
ctg4773□ctg971□ctg2440□WAG-116A10  
ctg4773□ctg971□ctg3402□WAG-28H9  
ctg4773□ctg971□ctg3402□WAG-28M7  
ctg4773□ctg971□ctg3402□WAG-126J13  
ctg4773□ctg971□ctg3402□WAG-126L4  
ctg4774□ctg4780□ctg4992□WAG-63A19  
ctg4774□ctg4780□ctg4992□WAG-114B6  
ctg4775□□□WAG-72A6  
ctg4775□ctg516□ctg3878□WAG-7D10  
ctg4775□ctg516□ctg3878□WAG-41L4  
ctg4775□ctg516□ctg3878□WAG-65M3  
ctg4775□ctg516□ctg691□WAG-8F18  
ctg4775□ctg516□ctg691□WAG-21O1  
ctg4775□ctg516□ctg691□WAG-25K5  
ctg4775□ctg516□ctg691□WAG-33E3

ctg4775□ctg516□ctg691□WAG-75N23  
ctg4775□ctg6032□□WAG-80E14  
ctg4775□ctg6032□□WAG-94J3  
ctg4776□ctg2076□□WAG-4K9  
ctg4776□ctg2076□□WAG-22A16  
ctg4776□ctg2076□□WAG-29I1  
ctg4776□ctg2076□□WAG-75G9  
ctg4776□ctg2076□□WAG-77O6  
ctg4776□ctg2076□ctg2635□WAG-18D20  
ctg4776□ctg2076□ctg2635□WAG-74E12  
ctg4776□ctg2076□ctg2635□WAG-123D22  
ctg4776□ctg2076□ctg4440□WAG-11M1  
ctg4776□ctg2076□ctg4440□WAG-60D2  
ctg4777□□□WAG-14F9  
ctg4777□□□WAG-98N12  
ctg4777□ctg1136□□WAG-9M9  
ctg4777□ctg1136□□WAG-24N23  
ctg4777□ctg1136□□WAG-51F9  
ctg4777□ctg1136□ctg2791□WAG-9F14  
ctg4777□ctg1136□ctg2791□WAG-23H20  
ctg4777□ctg1136□ctg2791□WAG-24P4  
ctg4777□ctg1136□ctg2791□WAG-29H18  
ctg4777□ctg1136□ctg2791□WAG-58K10  
ctg4777□ctg1136□ctg2791□WAG-64E24  
ctg4777□ctg1136□ctg2791□WAG-99E9  
ctg4777□ctg1136□ctg2791□WAG-102N14  
ctg4777□ctg1136□ctg2913□WAG-7H10  
ctg4777□ctg1136□ctg2913□WAG-24A24  
ctg4777□ctg1136□ctg2913□WAG-49F14  
ctg4777□ctg1136□ctg2913□WAG-115C22  
ctg4777□ctg1136□ctg3969□WAG-50G23  
ctg4777□ctg1136□ctg3969□WAG-89K10  
ctg4777□ctg1136□ctg3969□WAG-112B7  
ctg4777□ctg1136□ctg6956□WAG-74L24  
ctg4777□ctg1136□ctg6956□WAG-97L3  
ctg4777□ctg1136□ctg6963□WAG-15E14  
ctg4777□ctg1136□ctg6963□WAG-114P22  
ctg4777□ctg1176□ctg1320□WAG-37G13  
ctg4777□ctg1176□ctg1320□WAG-60L20  
ctg4777□ctg1176□ctg1320□WAG-84C23  
ctg4777□ctg1176□ctg1320□WAG-105J15  
ctg4777□ctg2154□ctg2032□WAG-14A7  
ctg4777□ctg2154□ctg2032□WAG-39N23  
ctg4777□ctg2154□ctg2032□WAG-48O5  
ctg4777□ctg2154□ctg2032□WAG-67C11  
ctg4777□ctg6610□ctg3675□WAG-1G22  
ctg4777□ctg6610□ctg3675□WAG-11N10  
ctg4777□ctg6610□ctg3675□WAG-80K4  
ctg4777□ctg715□ctg1475□WAG-29B17  
ctg4777□ctg715□ctg1475□WAG-57A18  
ctg4777□ctg715□ctg1475□WAG-83F7  
ctg4777□ctg715□ctg1475□WAG-85P17  
ctg4777□ctg715□ctg1475□WAG-107G23  
ctg4777□ctg715□ctg1475□WAG-129N18  
ctg4777□ctg715□ctg573□WAG-47D11  
ctg4777□ctg715□ctg573□WAG-59F21



ctg4777□ctg715□ctg573□WAG-73O1  
ctg4777□ctg715□ctg573□WAG-90J16  
ctg4777□ctg715□ctg573□WAG-128F1  
ctg4778□□□WAG-58N14  
ctg4778□ctg798□ctg1113□WAG-42D10  
ctg4778□ctg798□ctg1113□WAG-44B17  
ctg4778□ctg798□ctg1113□WAG-56E6  
ctg4778□ctg798□ctg1113□WAG-63D8  
ctg4778□ctg798□ctg1113□WAG-79J11  
ctg4778□ctg798□ctg1113□WAG-79P24  
ctg4778□ctg798□ctg1113□WAG-85I7  
ctg4778□ctg798□ctg1113□WAG-92G8  
ctg4778□ctg798□ctg1113□WAG-101O20  
ctg4778□ctg798□ctg1113□WAG-114I8  
ctg4778□ctg798□ctg1113□WAG-118O21  
ctg4779□□□WAG-20P20  
ctg4779□ctg2748□□□WAG-18O1  
ctg4779□ctg2748□ctg3672□WAG-57G14  
ctg4779□ctg2748□ctg3672□WAG-89H1  
ctg4779□ctg2748□ctg3672□WAG-116J19  
ctg4779□ctg4176□ctg4414□WAG-45B3  
ctg4779□ctg4176□ctg4414□WAG-75N18  
ctg478□ctg1534□□□WAG-37O18  
ctg478□ctg1534□ctg1744□WAG-48J5  
ctg478□ctg1534□ctg1744□WAG-65I22  
ctg478□ctg1534□ctg1744□WAG-70D14  
ctg478□ctg1534□ctg1744□WAG-85O6  
ctg478□ctg1534□ctg1744□WAG-108K7  
ctg478□ctg1534□ctg1744□WAG-112F22  
ctg478□ctg1534□ctg5870□WAG-22E17  
ctg478□ctg1534□ctg5870□WAG-99N10  
ctg4780□ctg2024□ctg1871□WAG-4I8  
ctg4780□ctg2024□ctg1871□WAG-70I14  
ctg4780□ctg2024□ctg1871□WAG-86P24  
ctg4780□ctg2024□ctg1871□WAG-97C24  
ctg4780□ctg913□□□WAG-9N18  
ctg4780□ctg913□□□WAG-112D14  
ctg4780□ctg913□ctg1703□WAG-34C18  
ctg4780□ctg913□ctg1703□WAG-48C17  
ctg4780□ctg913□ctg1703□WAG-59B18  
ctg4780□ctg913□ctg1703□WAG-95F20  
ctg4780□ctg913□ctg1703□WAG-130G20  
ctg4780□ctg913□ctg5683□WAG-65J6  
ctg4780□ctg913□ctg5683□WAG-100B4  
ctg4781□□□WAG-15O20  
ctg4781□□□WAG-16I2  
ctg4781□ctg3180□ctg3198□WAG-21A16  
ctg4781□ctg3180□ctg3198□WAG-68C5  
ctg4781□ctg3180□ctg3198□WAG-73A10  
ctg4781□ctg3180□ctg3198□WAG-91N5  
ctg4781□ctg95□□□WAG-8C6  
ctg4781□ctg95□□□WAG-101J18  
ctg4781□ctg95□ctg104□WAG-39F12  
ctg4781□ctg95□ctg104□WAG-44K2  
ctg4781□ctg95□ctg104□WAG-46M18  
ctg4781□ctg95□ctg104□WAG-58M24

ctg4781□ctg95□ctg104□WAG-62J16  
ctg4781□ctg95□ctg104□WAG-71A17  
ctg4781□ctg95□ctg104□WAG-72I12  
ctg4781□ctg95□ctg104□WAG-77K14  
ctg4781□ctg95□ctg104□WAG-80C20  
ctg4781□ctg95□ctg104□WAG-82H5  
ctg4781□ctg95□ctg104□WAG-95O8  
ctg4781□ctg95□ctg104□WAG-100F4  
ctg4781□ctg95□ctg104□WAG-110C12  
ctg4781□ctg95□ctg104□WAG-111P2  
ctg4781□ctg95□ctg104□WAG-115M22  
ctg4781□ctg95□ctg104□WAG-126A16  
ctg4781□ctg95□ctg104□WAG-126C22  
ctg4781□ctg95□ctg2210□WAG-4I21  
ctg4781□ctg95□ctg2210□WAG-12O1  
ctg4781□ctg95□ctg2210□WAG-76I11  
ctg4781□ctg95□ctg2210□WAG-88D16  
ctg4782□□□WAG-31D9  
ctg4782□ctg752□□WAG-30A5  
ctg4782□ctg752□□WAG-77N19  
ctg4782□ctg752□ctg2989□WAG-20L2  
ctg4782□ctg752□ctg2989□WAG-23M3  
ctg4782□ctg752□ctg2989□WAG-32M3  
ctg4782□ctg752□ctg2989□WAG-108P14  
ctg4782□ctg752□ctg615□WAG-48J10  
ctg4782□ctg752□ctg615□WAG-58N16  
ctg4782□ctg752□ctg615□WAG-66F2  
ctg4782□ctg752□ctg615□WAG-84N15  
ctg4782□ctg752□ctg615□WAG-108I9  
ctg4782□ctg752□ctg615□WAG-119B24  
ctg4782□ctg752□ctg615□WAG-121E14  
ctg4783□□□WAG-40A24  
ctg4783□ctg3713□ctg3926□WAG-19K18  
ctg4783□ctg3713□ctg3926□WAG-79I4  
ctg4783□ctg3713□ctg3926□WAG-89L8  
ctg4783□ctg613□□WAG-41E13  
ctg4783□ctg613□□WAG-57K4  
ctg4783□ctg613□□WAG-69C20  
ctg4783□ctg613□□WAG-74B16  
ctg4783□ctg613□ctg1079□WAG-59H18  
ctg4783□ctg613□ctg1079□WAG-71H4  
ctg4783□ctg613□ctg1079□WAG-81H2  
ctg4783□ctg613□ctg1079□WAG-84J6  
ctg4783□ctg613□ctg1079□WAG-108M16  
ctg4783□ctg613□ctg2765□WAG-15F15  
ctg4783□ctg613□ctg2765□WAG-58A1  
ctg4783□ctg613□ctg2765□WAG-79B9  
ctg4783□ctg613□ctg2765□WAG-91B15  
ctg4783□ctg613□ctg2765□WAG-128D21  
ctg4783□ctg613□ctg4742□WAG-49I22  
ctg4783□ctg613□ctg4742□WAG-82L5  
ctg4783□ctg696□□WAG-53A17  
ctg4783□ctg696□□WAG-57O18  
ctg4783□ctg696□ctg5404□WAG-66E21  
ctg4783□ctg696□ctg5404□WAG-107D9  
ctg4783□ctg696□ctg564□WAG-11E9

ctg4783□ctg696□ctg564□WAG-41L3  
ctg4783□ctg696□ctg564□WAG-49L2  
ctg4783□ctg696□ctg564□WAG-79M20  
ctg4783□ctg696□ctg564□WAG-84C20  
ctg4783□ctg696□ctg564□WAG-92H6  
ctg4783□ctg696□ctg564□WAG-105B22  
ctg4784□□□WAG-51H3  
ctg4784□□□WAG-81F1  
ctg4784□ctg1621□□WAG-23O22  
ctg4784□ctg1621□□WAG-120I4  
ctg4784□ctg1621□ctg2434□WAG-60N4  
ctg4784□ctg1621□ctg2434□WAG-103I9  
ctg4784□ctg1621□ctg2434□WAG-117N5  
ctg4784□ctg1621□ctg2434□WAG-129J7  
ctg4784□ctg2064□ctg2616□WAG-48H17  
ctg4784□ctg2064□ctg2616□WAG-67E11  
ctg4784□ctg2064□ctg2616□WAG-75N12  
ctg4784□ctg2064□ctg2616□WAG-87C11  
ctg4784□ctg3862□□WAG-53M23  
ctg4784□ctg3862□ctg5166□WAG-42E24  
ctg4784□ctg3862□ctg5166□WAG-46F20  
ctg4784□ctg4939□ctg5301□WAG-46H13  
ctg4784□ctg4939□ctg5301□WAG-54G9  
ctg4784□ctg540□□WAG-45L9  
ctg4784□ctg540□□WAG-53P4  
ctg4784□ctg540□□WAG-106C11  
ctg4784□ctg540□□WAG-123F14  
ctg4784□ctg540□ctg439□WAG-40O14  
ctg4784□ctg540□ctg439□WAG-71F5  
ctg4784□ctg540□ctg439□WAG-85L5  
ctg4784□ctg540□ctg439□WAG-114B3  
ctg4784□ctg540□ctg439□WAG-114G15  
ctg4784□ctg540□ctg439□WAG-123H14  
ctg4784□ctg6155□□WAG-12C18  
ctg4784□ctg6155□□WAG-18K17  
ctg4785□□□WAG-107N4  
ctg4785□ctg1919□ctg1756□WAG-35P4  
ctg4785□ctg1919□ctg1756□WAG-51I10  
ctg4785□ctg1919□ctg1756□WAG-117O2  
ctg4785□ctg1919□ctg1756□WAG-129M6  
ctg4785□ctg4343□□WAG-48H18  
ctg4785□ctg4343□ctg6901□WAG-7H5  
ctg4785□ctg4343□ctg6901□WAG-10N23  
ctg4786□□□WAG-57F19  
ctg4786□□□WAG-78B19  
ctg4786□□□WAG-106A13  
ctg4786□ctg3706□□WAG-65K11  
ctg4786□ctg3706□□WAG-95I20  
ctg4786□ctg3706□ctg4844□WAG-24O15  
ctg4786□ctg3706□ctg4844□WAG-80C22  
ctg4787□ctg449□□WAG-4J4  
ctg4787□ctg449□□WAG-90A21  
ctg4787□ctg449□ctg479□WAG-36O16  
ctg4787□ctg449□ctg479□WAG-43M20  
ctg4787□ctg449□ctg479□WAG-46K14  
ctg4787□ctg449□ctg479□WAG-64O15

ctg4787□ctg449□ctg479□WAG-92F24  
ctg4787□ctg449□ctg479□WAG-104L8  
ctg4787□ctg449□ctg479□WAG-106C2  
ctg4787□ctg449□ctg479□WAG-112G5  
ctg4787□ctg449□ctg479□WAG-122D23  
ctg4788□□□WAG-4I9  
ctg4788□□□WAG-46O23  
ctg4788□□□WAG-59D21  
ctg4788□□□WAG-103G5  
ctg4788□□□WAG-109F14  
ctg4788□□□WAG-122F22  
ctg4788□ctg1401□ctg1251□WAG-36C20  
ctg4788□ctg1401□ctg1251□WAG-60B22  
ctg4788□ctg1401□ctg1251□WAG-88L9  
ctg4788□ctg1427□ctg1278□WAG-34C8  
ctg4788□ctg1427□ctg1278□WAG-37A9  
ctg4788□ctg1427□ctg1278□WAG-75M9  
ctg4788□ctg1427□ctg1278□WAG-103F4  
ctg4788□ctg1833□□WAG-100P4  
ctg4788□ctg1833□ctg1663□WAG-91D20  
ctg4788□ctg1833□ctg1663□WAG-95O23  
ctg4788□ctg1833□ctg1663□WAG-122F12  
ctg4788□ctg1833□ctg1663□WAG-123G12  
ctg4788□ctg2134□ctg2004□WAG-51B8  
ctg4788□ctg2134□ctg2004□WAG-83L11  
ctg4788□ctg2134□ctg2004□WAG-108M4  
ctg4788□ctg473□□WAG-30D21  
ctg4788□ctg473□ctg579□WAG-20F22  
ctg4788□ctg473□ctg579□WAG-30B20  
ctg4788□ctg473□ctg579□WAG-33A4  
ctg4788□ctg473□ctg579□WAG-70F7  
ctg4788□ctg473□ctg579□WAG-71D10  
ctg4788□ctg473□ctg579□WAG-118N9  
ctg4788□ctg473□ctg579□WAG-123I5  
ctg4788□ctg473□ctg579□WAG-129M8  
ctg4788□ctg500□□WAG-23N24  
ctg4788□ctg500□□WAG-124B14  
ctg4788□ctg500□ctg497□WAG-8A24  
ctg4788□ctg500□ctg497□WAG-20B9  
ctg4788□ctg500□ctg497□WAG-21O20  
ctg4788□ctg500□ctg497□WAG-36J23  
ctg4788□ctg500□ctg497□WAG-60E22  
ctg4788□ctg500□ctg497□WAG-63F23  
ctg4788□ctg500□ctg497□WAG-69G24  
ctg4788□ctg500□ctg497□WAG-81M8  
ctg4788□ctg500□ctg497□WAG-84M17  
ctg4788□ctg500□ctg497□WAG-124A14  
ctg4788□ctg500□ctg497□WAG-129I7  
ctg4788□ctg500□ctg497□WAG-130M20  
ctg4788□ctg6262□□WAG-19N12  
ctg4788□ctg6262□□WAG-68J1  
ctg4788□ctg769□ctg630□WAG-41A15  
ctg4788□ctg769□ctg630□WAG-51N24  
ctg4788□ctg769□ctg630□WAG-52L1  
ctg4788□ctg769□ctg630□WAG-89I5  
ctg4788□ctg769□ctg630□WAG-122A5

ctg4788□ctg769□ctg630□WAG-122B5  
ctg4788□ctg769□ctg630□WAG-127B15  
ctg4789□□□WAG-67K1  
ctg4789□ctg118□ctg163□WAG-8O16  
ctg4789□ctg118□ctg163□WAG-18M3  
ctg4789□ctg118□ctg163□WAG-19P14  
ctg4789□ctg118□ctg163□WAG-49L6  
ctg4789□ctg118□ctg163□WAG-50J15  
ctg4789□ctg118□ctg163□WAG-52C16  
ctg4789□ctg118□ctg163□WAG-80C19  
ctg4789□ctg118□ctg163□WAG-85C16  
ctg4789□ctg118□ctg163□WAG-115B3  
ctg4789□ctg118□ctg6929□WAG-35D12  
ctg4789□ctg118□ctg6929□WAG-81P23  
ctg4789□ctg4001□□WAG-46H1  
ctg4789□ctg4001□□WAG-128B21  
ctg4789□ctg4001□ctg5899□WAG-96A18  
ctg4789□ctg4001□ctg5899□WAG-119E20  
ctg4789□ctg430□□WAG-33D11  
ctg4789□ctg430□ctg1100□WAG-4P2  
ctg4789□ctg430□ctg1100□WAG-22K9  
ctg4789□ctg430□ctg1100□WAG-27B1  
ctg4789□ctg430□ctg1100□WAG-63G18  
ctg4789□ctg430□ctg1100□WAG-75K5  
ctg4789□ctg430□ctg1100□WAG-109F16  
ctg4789□ctg430□ctg839□WAG-2E15  
ctg4789□ctg430□ctg839□WAG-4P13  
ctg4789□ctg430□ctg839□WAG-7G6  
ctg4789□ctg430□ctg839□WAG-12C20  
ctg4789□ctg430□ctg839□WAG-12I20  
ctg4789□ctg430□ctg839□WAG-34H7  
ctg4789□ctg430□ctg839□WAG-43J4  
ctg4789□ctg430□ctg839□WAG-57J21  
ctg4789□ctg430□ctg839□WAG-68H14  
ctg4789□ctg430□ctg839□WAG-68H21  
ctg4789□ctg430□ctg839□WAG-74G15  
ctg4789□ctg430□ctg839□WAG-87E7  
ctg4789□ctg5558□ctg6705□WAG-33K21  
ctg4789□ctg5558□ctg6705□WAG-55H8  
ctg479□ctg1329□□WAG-7G7  
ctg479□ctg1329□□WAG-40I12  
ctg479□ctg1329□□WAG-72K21  
ctg479□ctg1329□□WAG-103G18  
ctg479□ctg1329□ctg1984□WAG-64A16  
ctg479□ctg1329□ctg1984□WAG-76K19  
ctg479□ctg1329□ctg1984□WAG-80E9  
ctg479□ctg1329□ctg1984□WAG-100E1  
ctg479□ctg1329□ctg3256□WAG-70N16  
ctg479□ctg1329□ctg3256□WAG-74N6  
ctg4790□□□WAG-31C19  
ctg4790□ctg3166□ctg3188□WAG-72C15  
ctg4790□ctg3166□ctg3188□WAG-121O1  
ctg4790□ctg3166□ctg3188□WAG-128P10  
ctg4791□□□WAG-17I15  
ctg4791□□□WAG-26J1  
ctg4791□□□WAG-30F16

ctg4791□□□WAG-47G12  
ctg4791□□□WAG-63D3  
ctg4791□□□WAG-122J12  
ctg4791□ctg1101□□WAG-72P15  
ctg4791□ctg1101□ctg1132□WAG-15L8  
ctg4791□ctg1101□ctg1132□WAG-19K7  
ctg4791□ctg1101□ctg1132□WAG-34D7  
ctg4791□ctg1101□ctg1132□WAG-67B15  
ctg4791□ctg1101□ctg1132□WAG-109D21  
ctg4791□ctg1101□ctg1943□WAG-13L15  
ctg4791□ctg1101□ctg1943□WAG-35C9  
ctg4791□ctg1101□ctg1943□WAG-86C5  
ctg4791□ctg1101□ctg1943□WAG-86F7  
ctg4791□ctg1101□ctg1943□WAG-98K3  
ctg4791□ctg1101□ctg2086□WAG-23J9  
ctg4791□ctg1101□ctg2086□WAG-39F16  
ctg4791□ctg1101□ctg2086□WAG-84L17  
ctg4791□ctg1101□ctg2086□WAG-86M2  
ctg4791□ctg1101□ctg2086□WAG-89H13  
ctg4791□ctg1101□ctg2086□WAG-111B11  
ctg4791□ctg1101□ctg4666□WAG-30A14  
ctg4791□ctg1101□ctg4666□WAG-121L3  
ctg4791□ctg1153□□WAG-32L19  
ctg4791□ctg1153□□WAG-67G1  
ctg4791□ctg1153□□WAG-101C23  
ctg4791□ctg1153□□WAG-114N12  
ctg4791□ctg1153□ctg2180□WAG-17E4  
ctg4791□ctg1153□ctg2180□WAG-31I18  
ctg4791□ctg1153□ctg2180□WAG-62O23  
ctg4791□ctg1153□ctg2180□WAG-84I3  
ctg4791□ctg1153□ctg3281□WAG-33J2  
ctg4791□ctg1153□ctg3281□WAG-94I10  
ctg4791□ctg1153□ctg3281□WAG-111E16  
ctg4791□ctg1166□□WAG-25P17  
ctg4791□ctg1166□□WAG-82N4  
ctg4791□ctg1166□□WAG-122D15  
ctg4791□ctg1166□ctg1352□WAG-31I5  
ctg4791□ctg1166□ctg1352□WAG-42J23  
ctg4791□ctg1166□ctg1352□WAG-47J6  
ctg4791□ctg1166□ctg1352□WAG-50N4  
ctg4791□ctg1166□ctg1352□WAG-67K2  
ctg4791□ctg1166□ctg1352□WAG-101J2  
ctg4791□ctg1166□ctg1352□WAG-112K9  
ctg4791□ctg5644□ctg6815□WAG-2F12  
ctg4791□ctg5644□ctg6815□WAG-71O6  
ctg4792□□□WAG-67J2  
ctg4792□ctg2676□ctg3949□WAG-76C12  
ctg4792□ctg2676□ctg3949□WAG-87A13  
ctg4792□ctg2676□ctg3949□WAG-129A8  
ctg4792□ctg2676□ctg4289□WAG-19J24  
ctg4792□ctg2676□ctg4289□WAG-54I15  
ctg4792□ctg2676□ctg4289□WAG-125J20  
ctg4793□□□WAG-28C3  
ctg4793□□□WAG-34N1  
ctg4793□ctg2079□ctg1938□WAG-8P3  
ctg4793□ctg2079□ctg1938□WAG-37J21

ctg4793□ctg2079□ctg1938□WAG-89M22  
ctg4793□ctg2079□ctg1938□WAG-94C7  
ctg4793□ctg90□ctg226□WAG-10A18  
ctg4793□ctg90□ctg226□WAG-13B22  
ctg4793□ctg90□ctg226□WAG-15A3  
ctg4793□ctg90□ctg226□WAG-16E14  
ctg4793□ctg90□ctg226□WAG-20D1  
ctg4793□ctg90□ctg226□WAG-21G3  
ctg4793□ctg90□ctg226□WAG-23I19  
ctg4793□ctg90□ctg226□WAG-34B22  
ctg4793□ctg90□ctg226□WAG-34D15  
ctg4793□ctg90□ctg226□WAG-51K2  
ctg4793□ctg90□ctg226□WAG-53A9  
ctg4793□ctg90□ctg226□WAG-57L12  
ctg4793□ctg90□ctg226□WAG-75C18  
ctg4793□ctg90□ctg226□WAG-81J16  
ctg4793□ctg90□ctg226□WAG-85B6  
ctg4793□ctg90□ctg226□WAG-91A7  
ctg4793□ctg90□ctg226□WAG-91F19  
ctg4793□ctg90□ctg226□WAG-104L13  
ctg4793□ctg90□ctg226□WAG-105P24  
ctg4793□ctg90□ctg226□WAG-106H15  
ctg4793□ctg90□ctg226□WAG-107F12  
ctg4793□ctg90□ctg226□WAG-121G18  
ctg4793□ctg90□ctg3374□WAG-18N22  
ctg4793□ctg90□ctg3374□WAG-26H9  
ctg4793□ctg90□ctg3374□WAG-112J4  
ctg4793□ctg959□□WAG-85E12  
ctg4793□ctg959□ctg810□WAG-18A20  
ctg4793□ctg959□ctg810□WAG-18J15  
ctg4793□ctg959□ctg810□WAG-113A3  
ctg4793□ctg959□ctg810□WAG-114E20  
ctg4793□ctg959□ctg810□WAG-127L1  
ctg4794□□□WAG-26P22  
ctg4794□ctg1757□□WAG-53F14  
ctg4794□ctg1757□ctg2930□WAG-47F19  
ctg4794□ctg1757□ctg2930□WAG-64C19  
ctg4794□ctg1757□ctg2930□WAG-106H3  
ctg4794□ctg1757□ctg2930□WAG-121A20  
ctg4794□ctg1757□ctg3424□WAG-7E16  
ctg4794□ctg1757□ctg3424□WAG-51H2  
ctg4794□ctg1757□ctg3424□WAG-77A13  
ctg4794□ctg1757□ctg3424□WAG-84A13  
ctg4794□ctg1757□ctg3424□WAG-118C11  
ctg4794□ctg1757□ctg3424□WAG-120L8  
ctg4794□ctg1757□ctg3424□WAG-120P14  
ctg4794□ctg945□□WAG-125G21  
ctg4794□ctg945□ctg1027□WAG-24J12  
ctg4794□ctg945□ctg1027□WAG-35P20  
ctg4794□ctg945□ctg1027□WAG-72A4  
ctg4794□ctg945□ctg1027□WAG-95C15  
ctg4794□ctg945□ctg1027□WAG-105D17  
ctg4794□ctg945□ctg1027□WAG-108J3  
ctg4794□ctg945□ctg1027□WAG-122F7  
ctg4795□□□WAG-38M16  
ctg4795□ctg578□□WAG-89A6

ctg4795□ctg578□ctg530□WAG-21F2  
ctg4795□ctg578□ctg530□WAG-27P7  
ctg4795□ctg578□ctg530□WAG-39N15  
ctg4795□ctg578□ctg530□WAG-59M14  
ctg4795□ctg578□ctg530□WAG-65B19  
ctg4795□ctg578□ctg530□WAG-65L22  
ctg4795□ctg578□ctg530□WAG-85C12  
ctg4795□ctg578□ctg530□WAG-103E19  
ctg4795□ctg578□ctg530□WAG-113J6  
ctg4796□ctg61□ctg53□WAG-3J1  
ctg4796□ctg61□ctg53□WAG-8O3  
ctg4796□ctg61□ctg53□WAG-29A20  
ctg4796□ctg61□ctg53□WAG-37O12  
ctg4796□ctg61□ctg53□WAG-53O20  
ctg4796□ctg61□ctg53□WAG-54L21  
ctg4796□ctg61□ctg53□WAG-75O8  
ctg4796□ctg61□ctg53□WAG-108C17  
ctg4796□ctg61□ctg53□WAG-110B13  
ctg4797□□□WAG-85F17  
ctg4797□ctg701□ctg1619□WAG-34K11  
ctg4797□ctg701□ctg1619□WAG-81E3  
ctg4797□ctg701□ctg1619□WAG-111O12  
ctg4797□ctg701□ctg4974□WAG-3C5  
ctg4797□ctg701□ctg4974□WAG-64L12  
ctg4797□ctg701□ctg5240□WAG-49N2  
ctg4797□ctg701□ctg5240□WAG-100B7  
ctg4797□ctg701□ctg566□WAG-14P12  
ctg4797□ctg701□ctg566□WAG-38I13  
ctg4797□ctg701□ctg566□WAG-44B7  
ctg4797□ctg701□ctg566□WAG-47L8  
ctg4797□ctg701□ctg566□WAG-71B15  
ctg4797□ctg701□ctg566□WAG-84I17  
ctg4797□ctg701□ctg566□WAG-103K9  
ctg4797□ctg701□ctg566□WAG-117H3  
ctg4797□ctg701□ctg566□WAG-124D7  
ctg4797□ctg701□ctg566□WAG-124J7  
ctg4797□ctg701□ctg566□WAG-128B2  
ctg4798□□□WAG-47E24  
ctg4798□ctg2074□ctg1930□WAG-55L2  
ctg4798□ctg2074□ctg1930□WAG-78E5  
ctg4798□ctg2074□ctg1930□WAG-85C23  
ctg4798□ctg2074□ctg1930□WAG-108P1  
ctg4798□ctg22□□WAG-116P14  
ctg4798□ctg22□ctg17□WAG-5G22  
ctg4798□ctg22□ctg17□WAG-12H17  
ctg4798□ctg22□ctg17□WAG-14E9  
ctg4798□ctg22□ctg17□WAG-17H1  
ctg4798□ctg22□ctg17□WAG-26O10  
ctg4798□ctg22□ctg17□WAG-29F6  
ctg4798□ctg22□ctg17□WAG-46F3  
ctg4798□ctg22□ctg17□WAG-49H17  
ctg4798□ctg22□ctg17□WAG-54P20  
ctg4798□ctg22□ctg17□WAG-61O17  
ctg4798□ctg22□ctg17□WAG-63K16  
ctg4798□ctg22□ctg17□WAG-67D17  
ctg4798□ctg22□ctg17□WAG-104F20



ctg4798□ctg22□ctg17□WAG-104M21  
ctg4798□ctg22□ctg17□WAG-109O4  
ctg4798□ctg22□ctg17□WAG-125A5  
ctg4798□ctg936□□WAG-6L13  
ctg4798□ctg936□□WAG-13J5  
ctg4798□ctg936□□WAG-26J6  
ctg4798□ctg936□ctg1785□WAG-40E11  
ctg4798□ctg936□ctg1785□WAG-47B11  
ctg4798□ctg936□ctg1785□WAG-52F23  
ctg4798□ctg936□ctg1785□WAG-63N22  
ctg4798□ctg936□ctg1785□WAG-87I22  
ctg4799□□□WAG-4O17  
ctg4799□□□WAG-16G2  
ctg4799□□□WAG-43J18  
ctg4799□□□WAG-111M17  
ctg4799□ctg1418□ctg1598□WAG-32L18  
ctg4799□ctg1418□ctg1598□WAG-89I11  
ctg4799□ctg1418□ctg1598□WAG-96P4  
ctg4799□ctg1418□ctg1598□WAG-118A10  
ctg4799□ctg358□□WAG-100E17  
ctg4799□ctg358□□WAG-112K15  
ctg4799□ctg358□ctg359□WAG-4L17  
ctg4799□ctg358□ctg359□WAG-12J12  
ctg4799□ctg358□ctg359□WAG-27D19  
ctg4799□ctg358□ctg359□WAG-45P15  
ctg4799□ctg358□ctg359□WAG-77G14  
ctg4799□ctg358□ctg359□WAG-90L13  
ctg4799□ctg358□ctg359□WAG-102J22  
ctg4799□ctg358□ctg359□WAG-105L10  
ctg4799□ctg358□ctg359□WAG-129A2  
ctg48□ctg161□□WAG-19K15  
ctg48□ctg161□ctg174□WAG-12J13  
ctg48□ctg161□ctg174□WAG-24K1  
ctg48□ctg161□ctg174□WAG-46M2  
ctg48□ctg161□ctg174□WAG-58B17  
ctg48□ctg161□ctg174□WAG-61C13  
ctg48□ctg161□ctg174□WAG-72J11  
ctg48□ctg161□ctg174□WAG-82E22  
ctg48□ctg161□ctg174□WAG-105O5  
ctg48□ctg161□ctg174□WAG-125A23  
ctg480□ctg1162□ctg1006□WAG-3I5  
ctg480□ctg1162□ctg1006□WAG-21D15  
ctg480□ctg1162□ctg1006□WAG-97J16  
ctg480□ctg1162□ctg1006□WAG-101M9  
ctg480□ctg1592□□WAG-44P7  
ctg480□ctg1592□ctg1440□WAG-40E5  
ctg480□ctg1592□ctg1440□WAG-81A11  
ctg480□ctg1592□ctg1440□WAG-102C17  
ctg480□ctg1592□ctg1440□WAG-127H2  
ctg4800□□□WAG-31K21  
ctg4800□□□WAG-108J11  
ctg4800□□□WAG-128K5  
ctg4800□ctg1002□□WAG-36F11  
ctg4800□ctg1002□□WAG-38C20  
ctg4800□ctg1002□ctg1096□WAG-49M1  
ctg4800□ctg1002□ctg1096□WAG-60D17

ctg4800□ctg1002□ctg1096□WAG-79I11  
ctg4800□ctg1002□ctg1096□WAG-94F3  
ctg4800□ctg1002□ctg1096□WAG-123P13  
ctg4800□ctg1002□ctg1096□WAG-129M21  
ctg4801□□□WAG-3G10  
ctg4801□ctg4052□□WAG-11O1  
ctg4801□ctg4052□ctg5622□WAG-66I2  
ctg4801□ctg4052□ctg5622□WAG-74L5  
ctg4802□□□WAG-38E10  
ctg4802□ctg1026□ctg853□WAG-16C1  
ctg4802□ctg1026□ctg853□WAG-16E17  
ctg4802□ctg1026□ctg853□WAG-20L6  
ctg4802□ctg1026□ctg853□WAG-57H6  
ctg4802□ctg1026□ctg853□WAG-57H7  
ctg4802□ctg1026□ctg853□WAG-68G13  
ctg4802□ctg1026□ctg853□WAG-95H17  
ctg4802□ctg5658□ctg6825□WAG-73D15  
ctg4802□ctg5658□ctg6825□WAG-110L21  
ctg4802□ctg6411□□WAG-30N2  
ctg4802□ctg6411□□WAG-56C21  
ctg4802□ctg656□ctg533□WAG-13O9  
ctg4802□ctg656□ctg533□WAG-15D15  
ctg4802□ctg656□ctg533□WAG-18I1  
ctg4802□ctg656□ctg533□WAG-38B19  
ctg4802□ctg656□ctg533□WAG-45H11  
ctg4802□ctg656□ctg533□WAG-48P8  
ctg4802□ctg656□ctg533□WAG-55P23  
ctg4802□ctg656□ctg533□WAG-60C11  
ctg4802□ctg656□ctg533□WAG-70H19  
ctg4802□ctg656□ctg533□WAG-77K18  
ctg4802□ctg656□ctg533□WAG-84E2  
ctg4802□ctg656□ctg533□WAG-87P23  
ctg4802□ctg656□ctg533□WAG-100I23  
ctg4802□ctg656□ctg533□WAG-101I10  
ctg4802□ctg656□ctg533□WAG-105C3  
ctg4802□ctg656□ctg533□WAG-116P13  
ctg4802□ctg656□ctg533□WAG-119J21  
ctg4803□□□WAG-37M14  
ctg4803□□□WAG-97J3  
ctg4803□ctg2132□ctg2001□WAG-69K8  
ctg4803□ctg2132□ctg2001□WAG-110I7  
ctg4803□ctg2132□ctg2001□WAG-112L23  
ctg4803□ctg4149□□WAG-50A12  
ctg4803□ctg4149□ctg6409□WAG-63C14  
ctg4803□ctg4149□ctg6409□WAG-64N22  
ctg4804□□□WAG-39H22  
ctg4804□ctg1375□□WAG-4A17  
ctg4804□ctg1375□□WAG-60N10  
ctg4804□ctg1375□□WAG-80P21  
ctg4804□ctg1375□ctg1215□WAG-58L1  
ctg4804□ctg1375□ctg1215□WAG-59O6  
ctg4804□ctg1375□ctg1215□WAG-60B11  
ctg4804□ctg1375□ctg1215□WAG-79K6  
ctg4804□ctg1375□ctg1215□WAG-85B23  
ctg4804□ctg1375□ctg1215□WAG-105C12  
ctg4804□ctg1375□ctg1215□WAG-119B19

ctg4805□ctg1336□□WAG-88P5  
ctg4805□ctg1336□ctg1507□WAG-28M12  
ctg4805□ctg1336□ctg1507□WAG-44E10  
ctg4805□ctg1336□ctg1507□WAG-53I15  
ctg4805□ctg1336□ctg1507□WAG-73I13  
ctg4805□ctg1336□ctg1507□WAG-77P23  
ctg4805□ctg1336□ctg2010□WAG-35G14  
ctg4805□ctg1336□ctg2010□WAG-70E23  
ctg4805□ctg1336□ctg2010□WAG-96L3  
ctg4805□ctg1336□ctg2010□WAG-122P18  
ctg4805□ctg1336□ctg2010□WAG-128K21  
ctg4805□ctg1336□ctg5952□WAG-78A12  
ctg4805□ctg1336□ctg5952□WAG-118M14  
ctg4806□ctg598□□WAG-G12  
ctg4806□ctg598□□WAG-36D7  
ctg4806□ctg598□□WAG-97F17  
ctg4806□ctg598□ctg1883□WAG-20M19  
ctg4806□ctg598□ctg1883□WAG-44L24  
ctg4806□ctg598□ctg1883□WAG-63D19  
ctg4806□ctg598□ctg1883□WAG-130M22  
ctg4806□ctg598□ctg690□WAG-7I16  
ctg4806□ctg598□ctg690□WAG-22O1  
ctg4806□ctg598□ctg690□WAG-41A16  
ctg4806□ctg598□ctg690□WAG-48F23  
ctg4806□ctg598□ctg690□WAG-52O18  
ctg4806□ctg598□ctg690□WAG-61L9  
ctg4806□ctg598□ctg690□WAG-70O16  
ctg4806□ctg598□ctg690□WAG-73B3  
ctg4806□ctg598□ctg690□WAG-88M13  
ctg4806□ctg598□ctg690□WAG-90C18  
ctg4806□ctg598□ctg690□WAG-92K7  
ctg4806□ctg598□ctg690□WAG-104N16  
ctg4806□ctg598□ctg690□WAG-108I21  
ctg4806□ctg598□ctg690□WAG-123I23  
ctg4806□ctg598□ctg690□WAG-128M1  
ctg4806□ctg598□ctg690□WAG-130E20  
ctg4806□ctg598□ctg690□WAG-130F4  
ctg4807□□□WAG-53G16  
ctg4807□ctg493□□WAG-16J15  
ctg4807□ctg493□□WAG-105P20  
ctg4807□ctg493□□WAG-121J22  
ctg4807□ctg493□ctg1085□WAG-31C4  
ctg4807□ctg493□ctg1085□WAG-51N7  
ctg4807□ctg493□ctg1085□WAG-59N13  
ctg4807□ctg493□ctg1085□WAG-65E12  
ctg4807□ctg493□ctg525□WAG-32H1  
ctg4807□ctg493□ctg525□WAG-44L13  
ctg4807□ctg493□ctg525□WAG-68G3  
ctg4807□ctg493□ctg525□WAG-88N5  
ctg4807□ctg493□ctg525□WAG-117L8  
ctg4807□ctg539□ctg614□WAG-10M10  
ctg4807□ctg539□ctg614□WAG-13M14  
ctg4807□ctg539□ctg614□WAG-14D3  
ctg4807□ctg539□ctg614□WAG-24E5  
ctg4807□ctg539□ctg614□WAG-38J12  
ctg4807□ctg539□ctg614□WAG-49O20

ctg4807□ctg539□ctg614□WAG-49O22  
ctg4807□ctg539□ctg614□WAG-52N6  
ctg4807□ctg539□ctg614□WAG-67D13  
ctg4807□ctg539□ctg614□WAG-90J3  
ctg4807□ctg539□ctg614□WAG-94M3  
ctg4807□ctg539□ctg614□WAG-113I14  
ctg4807□ctg539□ctg614□WAG-122G24  
ctg4807□ctg539□ctg614□WAG-122H24  
ctg4807□ctg539□ctg614□WAG-126O19  
ctg4808□ctg3372□ctg3450□WAG-42F6  
ctg4808□ctg3372□ctg3450□WAG-66C16  
ctg4808□ctg3372□ctg4909□WAG-23B9  
ctg4808□ctg3372□ctg4909□WAG-84J13  
ctg4808□ctg4686□ctg4854□WAG-18L12  
ctg4808□ctg4686□ctg4854□WAG-104A13  
ctg4808□ctg4782□ctg4995□WAG-3I18  
ctg4808□ctg4782□ctg4995□WAG-99K9  
ctg4808□ctg544□ctg444□WAG-52C1  
ctg4808□ctg544□ctg444□WAG-60B23  
ctg4808□ctg544□ctg444□WAG-70K12  
ctg4808□ctg544□ctg444□WAG-82G15  
ctg4808□ctg544□ctg444□WAG-109J24  
ctg4808□ctg544□ctg444□WAG-114B19  
ctg4808□ctg544□ctg444□WAG-120M9  
ctg4809□ctg1971□□WAG-85I24  
ctg4809□ctg1971□ctg1819□WAG-45A2  
ctg4809□ctg1971□ctg1819□WAG-82P24  
ctg4809□ctg1971□ctg1819□WAG-86L2  
ctg4809□ctg1971□ctg1819□WAG-100H21  
ctg4809□ctg1971□ctg1819□WAG-128P14  
ctg4809□ctg3741□ctg3972□WAG-68B18  
ctg4809□ctg3741□ctg3972□WAG-93L6  
ctg4809□ctg3741□ctg3972□WAG-101F9  
ctg481□□□WAG-1F15  
ctg481□□□WAG-43H6  
ctg481□ctg1545□ctg1391□WAG-27I3  
ctg481□ctg1545□ctg1391□WAG-37G18  
ctg481□ctg1545□ctg1391□WAG-71M14  
ctg481□ctg1545□ctg1391□WAG-75H16  
ctg481□ctg1545□ctg1391□WAG-105N24  
ctg481□ctg4869□ctg5160□WAG-64L22  
ctg481□ctg4869□ctg5160□WAG-76P22  
ctg4810□□□WAG-84P10  
ctg4810□□□WAG-86K23  
ctg4810□ctg2719□□WAG-100M4  
ctg4810□ctg2719□ctg3464□WAG-92H12  
ctg4810□ctg2719□ctg3464□WAG-123C22  
ctg4810□ctg2719□ctg3464□WAG-125J19  
ctg4810□ctg5593□ctg6753□WAG-56I1  
ctg4810□ctg5593□ctg6753□WAG-76D14  
ctg4810□ctg849□□WAG-109E11  
ctg4810□ctg849□ctg912□WAG-33E16  
ctg4810□ctg849□ctg912□WAG-90J10  
ctg4810□ctg849□ctg912□WAG-97A24  
ctg4810□ctg849□ctg912□WAG-104B15  
ctg4810□ctg849□ctg912□WAG-110N18

ctg4810□ctg849□ctg912□WAG-128P4  
ctg4811□ctg947□ctg1032□WAG-22I20  
ctg4811□ctg947□ctg1032□WAG-26L3  
ctg4811□ctg947□ctg1032□WAG-39H20  
ctg4811□ctg947□ctg1032□WAG-48H3  
ctg4811□ctg947□ctg1032□WAG-50M2  
ctg4811□ctg947□ctg1032□WAG-90L18  
ctg4812□ctg1081□□WAG-81L3  
ctg4812□ctg1081□ctg1244□WAG-50H6  
ctg4812□ctg1081□ctg1244□WAG-54H1  
ctg4812□ctg1081□ctg1244□WAG-61J2  
ctg4812□ctg1081□ctg1244□WAG-74B10  
ctg4812□ctg1081□ctg1244□WAG-80F16  
ctg4812□ctg1081□ctg1244□WAG-82G12  
ctg4812□ctg1081□ctg5990□WAG-42C23  
ctg4812□ctg1081□ctg5990□WAG-58G8  
ctg4812□ctg1818□□WAG-40L6  
ctg4812□ctg1818□ctg2226□WAG-10O20  
ctg4812□ctg1818□ctg2226□WAG-33H6  
ctg4812□ctg1818□ctg2226□WAG-73L18  
ctg4812□ctg1818□ctg2226□WAG-98L16  
ctg4812□ctg1818□ctg2226□WAG-112E16  
ctg4813□□□WAG-20I1  
ctg4813□□□WAG-73C5  
ctg4813□ctg549□□WAG-24F20  
ctg4813□ctg549□□WAG-54K2  
ctg4813□ctg549□ctg581□WAG-58C11  
ctg4813□ctg549□ctg581□WAG-59F8  
ctg4813□ctg549□ctg581□WAG-59P15  
ctg4813□ctg549□ctg581□WAG-67G2  
ctg4813□ctg549□ctg581□WAG-94L17  
ctg4813□ctg549□ctg581□WAG-100N22  
ctg4813□ctg549□ctg581□WAG-114O7  
ctg4813□ctg549□ctg581□WAG-124I9  
ctg4814□□□WAG-12L20  
ctg4814□ctg318□□WAG-34H22  
ctg4814□ctg318□ctg239□WAG-31H10  
ctg4814□ctg318□ctg239□WAG-45I17  
ctg4814□ctg318□ctg239□WAG-52G12  
ctg4814□ctg318□ctg239□WAG-89B10  
ctg4814□ctg318□ctg239□WAG-118B11  
ctg4814□ctg318□ctg239□WAG-121O12  
ctg4814□ctg318□ctg239□WAG-128M11  
ctg4815□□□WAG-10E13  
ctg4815□□□WAG-34I22  
ctg4815□ctg112□ctg88□WAG-6M18  
ctg4815□ctg112□ctg88□WAG-32C1  
ctg4815□ctg112□ctg88□WAG-32E21  
ctg4815□ctg112□ctg88□WAG-40P21  
ctg4815□ctg112□ctg88□WAG-62D18  
ctg4815□ctg112□ctg88□WAG-70H9  
ctg4815□ctg112□ctg88□WAG-72F12  
ctg4815□ctg112□ctg88□WAG-82P3  
ctg4815□ctg112□ctg88□WAG-94C3  
ctg4815□ctg112□ctg88□WAG-102B6  
ctg4815□ctg112□ctg88□WAG-112I17

ctg4815□ctg112□ctg88□WAG-112J16  
ctg4815□ctg112□ctg88□WAG-112K16  
ctg4815□ctg112□ctg88□WAG-112K17  
ctg4815□ctg112□ctg88□WAG-113O18  
ctg4815□ctg112□ctg88□WAG-125L12  
ctg4815□ctg112□ctg88□WAG-126B1  
ctg4815□ctg112□ctg88□WAG-127N22  
ctg4815□ctg3188□□WAG-71D12  
ctg4815□ctg3188□ctg3868□WAG-88A6  
ctg4815□ctg3188□ctg3868□WAG-99P8  
ctg4815□ctg3188□ctg3868□WAG-100B8  
ctg4815□ctg3188□ctg5716□WAG-90P4  
ctg4815□ctg3188□ctg5716□WAG-113E16  
ctg4816□□□WAG-73L1  
ctg4816□□□WAG-79G16  
ctg4816□ctg1456□ctg1638□WAG-23F11  
ctg4816□ctg1456□ctg1638□WAG-42F16  
ctg4816□ctg1456□ctg1638□WAG-66N23  
ctg4816□ctg1456□ctg1638□WAG-94J20  
ctg4816□ctg1456□ctg1638□WAG-106C6  
ctg4816□ctg1456□ctg1638□WAG-121O18  
ctg4816□ctg2033□ctg1888□WAG-44J2  
ctg4816□ctg2033□ctg1888□WAG-47C8  
ctg4816□ctg2033□ctg1888□WAG-106P7  
ctg4816□ctg2033□ctg1888□WAG-128B18  
ctg4816□ctg3088□ctg3088□WAG-5F3  
ctg4816□ctg3088□ctg3088□WAG-16G4  
ctg4816□ctg3088□ctg3088□WAG-63G21  
ctg4817□□□WAG-5L1  
ctg4817□□□WAG-7B7  
ctg4817□□□WAG-34N21  
ctg4817□□□WAG-48G22  
ctg4817□□□WAG-125A10  
ctg4817□ctg238□□WAG-41H19  
ctg4817□ctg238□ctg1472□WAG-37N7  
ctg4817□ctg238□ctg1472□WAG-78A11  
ctg4817□ctg238□ctg1472□WAG-78A17  
ctg4817□ctg238□ctg1472□WAG-90P15  
ctg4817□ctg238□ctg1472□WAG-116M14  
ctg4817□ctg238□ctg2033□WAG-32D18  
ctg4817□ctg238□ctg2033□WAG-34I14  
ctg4817□ctg238□ctg2033□WAG-81K12  
ctg4817□ctg238□ctg305□WAG-3B9  
ctg4817□ctg238□ctg305□WAG-21P7  
ctg4817□ctg238□ctg305□WAG-23K1  
ctg4817□ctg238□ctg305□WAG-27C8  
ctg4817□ctg238□ctg305□WAG-66D21  
ctg4817□ctg238□ctg305□WAG-86C11  
ctg4817□ctg238□ctg305□WAG-91I15  
ctg4817□ctg238□ctg305□WAG-97G20  
ctg4817□ctg238□ctg305□WAG-107O19  
ctg4817□ctg238□ctg305□WAG-110J23  
ctg4817□ctg238□ctg305□WAG-119D9  
ctg4817□ctg238□ctg305□WAG-127C8  
ctg4817□ctg238□ctg3967□WAG-28A8  
ctg4817□ctg238□ctg3967□WAG-108B13

ctg4817□ctg238□ctg3967□WAG-113I6  
ctg4817□ctg238□ctg5993□WAG-116H12  
ctg4817□ctg238□ctg5993□WAG-128L20  
ctg4817□ctg238□ctg638□WAG-15K18  
ctg4817□ctg238□ctg638□WAG-26A20  
ctg4817□ctg238□ctg638□WAG-59B6  
ctg4817□ctg238□ctg638□WAG-67C4  
ctg4817□ctg238□ctg638□WAG-69H1  
ctg4817□ctg238□ctg638□WAG-82N19  
ctg4817□ctg238□ctg638□WAG-86D11  
ctg4817□ctg238□ctg638□WAG-92I19  
ctg4817□ctg238□ctg638□WAG-100F7  
ctg4817□ctg238□ctg638□WAG-114B1  
ctg4817□ctg238□ctg638□WAG-127N13  
ctg4817□ctg3137□□WAG-21C10  
ctg4817□ctg3137□□WAG-23C10  
ctg4817□ctg3137□ctg5567□WAG-80L6  
ctg4817□ctg3137□ctg5567□WAG-95O13  
ctg4818□ctg1092□ctg933□WAG-49L23  
ctg4818□ctg1092□ctg933□WAG-75E14  
ctg4818□ctg1092□ctg933□WAG-108P18  
ctg4818□ctg1092□ctg933□WAG-114I11  
ctg4818□ctg1092□ctg933□WAG-114J11  
ctg4818□ctg537□□WAG-65D23  
ctg4818□ctg537□ctg3551□WAG-32M19  
ctg4818□ctg537□ctg3551□WAG-53C6  
ctg4818□ctg537□ctg3551□WAG-118L17  
ctg4818□ctg537□ctg494□WAG-28C9  
ctg4818□ctg537□ctg494□WAG-31P4  
ctg4818□ctg537□ctg494□WAG-40M5  
ctg4818□ctg537□ctg494□WAG-48K24  
ctg4818□ctg537□ctg494□WAG-104L16  
ctg4818□ctg537□ctg494□WAG-117D16  
ctg4819□□□WAG-95C8  
ctg4819□□□WAG-111J9  
ctg4819□□□WAG-129F4  
ctg4819□ctg4680□□WAG-4F2  
ctg4819□ctg4680□ctg6663□WAG-29A16  
ctg4819□ctg4680□ctg6663□WAG-64D12  
ctg4819□ctg750□□WAG-34A16  
ctg4819□ctg750□ctg1074□WAG-34O6  
ctg4819□ctg750□ctg1074□WAG-50H7  
ctg4819□ctg750□ctg1074□WAG-51E4  
ctg4819□ctg750□ctg1074□WAG-68I2  
ctg4819□ctg750□ctg1074□WAG-91J12  
ctg4819□ctg750□ctg1074□WAG-117G11  
ctg4819□ctg750□ctg1757□WAG-40B22  
ctg4819□ctg750□ctg1757□WAG-75N2  
ctg4819□ctg750□ctg1757□WAG-91O3  
ctg4819□ctg750□ctg1757□WAG-93I17  
ctg4819□ctg750□ctg1757□WAG-120G19  
ctg482□□□WAG-13F8  
ctg482□□□WAG-96E18  
ctg482□ctg1685□□WAG-1N18  
ctg482□ctg1685□□WAG-26O8  
ctg482□ctg1685□□WAG-30J17

ctg482□ctg1685□□WAG-87N4  
ctg482□ctg1685□ctg2672□WAG-67I3  
ctg482□ctg1685□ctg2672□WAG-81G20  
ctg482□ctg1685□ctg2672□WAG-120E13  
ctg482□ctg1685□ctg5661□WAG-61D2  
ctg482□ctg1685□ctg5661□WAG-109E10  
ctg482□ctg1869□□WAG-55J2  
ctg482□ctg1869□ctg2214□WAG-34O20  
ctg482□ctg1869□ctg2214□WAG-46N14  
ctg482□ctg1869□ctg2214□WAG-65N18  
ctg482□ctg1869□ctg2214□WAG-67L13  
ctg482□ctg1869□ctg2214□WAG-94H17  
ctg482□ctg1869□ctg2214□WAG-96F18  
ctg482□ctg1869□ctg4782□WAG-15F6  
ctg482□ctg1869□ctg4782□WAG-15F14  
ctg4820□ctg1784□ctg1616□WAG-61F9  
ctg4820□ctg1784□ctg1616□WAG-76H13  
ctg4820□ctg1784□ctg1616□WAG-89M9  
ctg4820□ctg2529□□WAG-1G13  
ctg4820□ctg2529□ctg3155□WAG-41C23  
ctg4820□ctg2529□ctg3155□WAG-116G20  
ctg4821□□□WAG-12O11  
ctg4821□□□WAG-18K3  
ctg4821□ctg6□□WAG-15C17  
ctg4821□ctg6□ctg135□WAG-7O17  
ctg4821□ctg6□ctg135□WAG-15O10  
ctg4821□ctg6□ctg135□WAG-17P8  
ctg4821□ctg6□ctg135□WAG-19J18  
ctg4821□ctg6□ctg135□WAG-25B4  
ctg4821□ctg6□ctg135□WAG-30E10  
ctg4821□ctg6□ctg135□WAG-58L2  
ctg4821□ctg6□ctg135□WAG-68L1  
ctg4821□ctg6□ctg135□WAG-86J22  
ctg4821□ctg6□ctg135□WAG-102G24  
ctg4821□ctg6□ctg135□WAG-107I3  
ctg4821□ctg6□ctg4198□WAG-34A14  
ctg4821□ctg6□ctg4198□WAG-109N13  
ctg4821□ctg6□ctg4198□WAG-112L5  
ctg4821□ctg6□ctg4198□WAG-114A11  
ctg4821□ctg6□ctg6□WAG-13L16  
ctg4821□ctg6□ctg6□WAG-14D12  
ctg4821□ctg6□ctg6□WAG-16O17  
ctg4821□ctg6□ctg6□WAG-17P15  
ctg4821□ctg6□ctg6□WAG-34H17  
ctg4821□ctg6□ctg6□WAG-36F9  
ctg4821□ctg6□ctg6□WAG-48F13  
ctg4821□ctg6□ctg6□WAG-50D14  
ctg4821□ctg6□ctg6□WAG-53A7  
ctg4821□ctg6□ctg6□WAG-62E20  
ctg4821□ctg6□ctg6□WAG-74B13  
ctg4821□ctg6□ctg6□WAG-83I20  
ctg4821□ctg6□ctg6□WAG-87O16  
ctg4821□ctg6□ctg6□WAG-100G2  
ctg4821□ctg6□ctg6□WAG-112M17  
ctg4821□ctg6□ctg6□WAG-125O19  
ctg4821□ctg6□ctg6□WAG-126H17



ctg4821□ctg6□ctg6□WAG-130O15  
ctg4822□□□WAG-O16  
ctg4822□□□WAG-46G14  
ctg4822□□□WAG-62I2  
ctg4822□□□WAG-95O11  
ctg4822□ctg1562□ctg1404□WAG-52L15  
ctg4822□ctg1562□ctg1404□WAG-55O9  
ctg4822□ctg1562□ctg1404□WAG-124L10  
ctg4822□ctg1562□ctg1404□WAG-127O22  
ctg4822□ctg863□ctg708□WAG-25E8  
ctg4822□ctg863□ctg708□WAG-25P10  
ctg4822□ctg863□ctg708□WAG-48D12  
ctg4822□ctg863□ctg708□WAG-49D10  
ctg4822□ctg863□ctg708□WAG-66E10  
ctg4822□ctg863□ctg708□WAG-68A9  
ctg4822□ctg863□ctg708□WAG-78I15  
ctg4822□ctg863□ctg708□WAG-81I17  
ctg4822□ctg863□ctg708□WAG-88D17  
ctg4822□ctg863□ctg708□WAG-91G20  
ctg4822□ctg863□ctg708□WAG-92J4  
ctg4822□ctg863□ctg708□WAG-97G14  
ctg4822□ctg863□ctg708□WAG-104G14  
ctg4822□ctg863□ctg708□WAG-104K19  
ctg4822□ctg863□ctg708□WAG-109M5  
ctg4822□ctg863□ctg708□WAG-119M4  
ctg4823□□□WAG-15L3  
ctg4823□□□WAG-125N18  
ctg4823□ctg375□□WAG-27G14  
ctg4823□ctg375□□WAG-113L10  
ctg4823□ctg375□ctg1411□WAG-14C10  
ctg4823□ctg375□ctg1411□WAG-20D22  
ctg4823□ctg375□ctg1411□WAG-21G12  
ctg4823□ctg375□ctg1411□WAG-31C15  
ctg4823□ctg375□ctg1411□WAG-31F13  
ctg4823□ctg375□ctg1411□WAG-39D8  
ctg4823□ctg375□ctg1411□WAG-44M1  
ctg4823□ctg375□ctg1411□WAG-86A7  
ctg4823□ctg375□ctg1411□WAG-106I7  
ctg4823□ctg375□ctg1411□WAG-112O3  
ctg4823□ctg375□ctg1411□WAG-118N1  
ctg4823□ctg375□ctg493□WAG-1J3  
ctg4823□ctg375□ctg493□WAG-36G24  
ctg4823□ctg375□ctg493□WAG-41J17  
ctg4823□ctg375□ctg493□WAG-56O17  
ctg4823□ctg375□ctg493□WAG-63G23  
ctg4823□ctg375□ctg493□WAG-68H7  
ctg4823□ctg375□ctg493□WAG-70I3  
ctg4823□ctg375□ctg493□WAG-76O9  
ctg4823□ctg375□ctg493□WAG-100K8  
ctg4823□ctg375□ctg493□WAG-128M21  
ctg4823□ctg870□□WAG-85I6  
ctg4823□ctg870□ctg935□WAG-39D19  
ctg4823□ctg870□ctg935□WAG-43M6  
ctg4823□ctg870□ctg935□WAG-50P12  
ctg4823□ctg870□ctg935□WAG-54E2  
ctg4823□ctg870□ctg935□WAG-58J19

ctg4823□ctg870□ctg935□WAG-84L13  
ctg4823□ctg870□ctg935□WAG-86B8  
ctg4823□ctg870□ctg935□WAG-94L16  
ctg4823□ctg870□ctg935□WAG-105F7  
ctg4823□ctg870□ctg935□WAG-114A9  
ctg4823□ctg870□ctg935□WAG-120J18  
ctg4823□ctg870□ctg935□WAG-126D5  
ctg4823□ctg870□ctg935□WAG-126H5  
ctg4824□□□WAG-88K8  
ctg4824□ctg3091□□WAG-29I20  
ctg4824□ctg3091□ctg3891□WAG-96D24  
ctg4824□ctg3091□ctg3891□WAG-104G9  
ctg4824□ctg3091□ctg3891□WAG-107M8  
ctg4824□ctg3091□ctg5363□WAG-41J4  
ctg4824□ctg3091□ctg5363□WAG-59E21  
ctg4825□□□WAG-128K7  
ctg4825□ctg5346□ctg6274□WAG-70L14  
ctg4825□ctg5346□ctg6274□WAG-81G24  
ctg4825□ctg743□□WAG-49J18  
ctg4825□ctg743□ctg3717□WAG-1B15  
ctg4825□ctg743□ctg3717□WAG-17M20  
ctg4825□ctg743□ctg3717□WAG-129G6  
ctg4825□ctg743□ctg599□WAG-22C19  
ctg4825□ctg743□ctg599□WAG-81P8  
ctg4825□ctg743□ctg599□WAG-89K21  
ctg4825□ctg743□ctg599□WAG-92I12  
ctg4825□ctg743□ctg599□WAG-108L19  
ctg4826□ctg1169□□WAG-16L9  
ctg4826□ctg1169□□WAG-25K10  
ctg4826□ctg1169□□WAG-37P23  
ctg4826□ctg1169□ctg1017□WAG-30O21  
ctg4826□ctg1169□ctg1017□WAG-41M1  
ctg4826□ctg1169□ctg1017□WAG-101E11  
ctg4826□ctg1169□ctg1017□WAG-113H23  
ctg4826□ctg1169□ctg1017□WAG-120L22  
ctg4827□□□WAG-23L24  
ctg4827□□□WAG-37D21  
ctg4827□□□WAG-128L15  
ctg4827□ctg1114□□WAG-77L16  
ctg4827□ctg1114□ctg1197□WAG-28H3  
ctg4827□ctg1114□ctg1197□WAG-33E11  
ctg4827□ctg1114□ctg1197□WAG-34K18  
ctg4827□ctg1114□ctg1197□WAG-46M4  
ctg4827□ctg1114□ctg1197□WAG-54H21  
ctg4827□ctg1114□ctg1197□WAG-104L6  
ctg4827□ctg2524□ctg3294□WAG-56K7  
ctg4827□ctg2524□ctg3294□WAG-86A1  
ctg4827□ctg2524□ctg3294□WAG-102J9  
ctg4827□ctg2524□ctg5953□WAG-8E6  
ctg4827□ctg2524□ctg5953□WAG-95J19  
ctg4827□ctg5338□ctg6250□WAG-19H6  
ctg4827□ctg5338□ctg6250□WAG-108B11  
ctg4827□ctg68□□WAG-83I14  
ctg4827□ctg68□ctg50□WAG-16O2  
ctg4827□ctg68□ctg50□WAG-45P19  
ctg4827□ctg68□ctg50□WAG-56L5

ctg4827□ctg68□ctg50□WAG-58I5  
ctg4827□ctg68□ctg50□WAG-66J21  
ctg4827□ctg68□ctg50□WAG-68K4  
ctg4827□ctg68□ctg50□WAG-75E13  
ctg4827□ctg68□ctg50□WAG-80K10  
ctg4827□ctg68□ctg50□WAG-83K14  
ctg4827□ctg68□ctg50□WAG-92A22  
ctg4827□ctg68□ctg50□WAG-98A15  
ctg4827□ctg68□ctg50□WAG-113N24  
ctg4827□ctg68□ctg50□WAG-115L6  
ctg4828□□□WAG-13O16  
ctg4828□□□WAG-96K17  
ctg4828□□□WAG-123O22  
ctg4828□ctg138□□WAG-2A12  
ctg4828□ctg138□□WAG-57H9  
ctg4828□ctg138□□WAG-68F19  
ctg4828□ctg138□□WAG-73E19  
ctg4828□ctg138□□WAG-98N9  
ctg4828□ctg138□□WAG-108D12  
ctg4828□ctg138□ctg193□WAG-5J6  
ctg4828□ctg138□ctg193□WAG-9M11  
ctg4828□ctg138□ctg193□WAG-10K24  
ctg4828□ctg138□ctg193□WAG-11P6  
ctg4828□ctg138□ctg193□WAG-14E4  
ctg4828□ctg138□ctg193□WAG-16M16  
ctg4828□ctg138□ctg193□WAG-19J17  
ctg4828□ctg138□ctg193□WAG-24B15  
ctg4828□ctg138□ctg193□WAG-35O17  
ctg4828□ctg138□ctg193□WAG-42L9  
ctg4828□ctg138□ctg193□WAG-44P14  
ctg4828□ctg138□ctg193□WAG-53F8  
ctg4828□ctg138□ctg193□WAG-74A6  
ctg4828□ctg138□ctg193□WAG-83N14  
ctg4828□ctg138□ctg193□WAG-101M18  
ctg4828□ctg138□ctg193□WAG-111L6  
ctg4828□ctg138□ctg193□WAG-122A17  
ctg4828□ctg138□ctg193□WAG-123B3  
ctg4828□ctg138□ctg193□WAG-124E7  
ctg4828□ctg138□ctg3933□WAG-49G17  
ctg4828□ctg138□ctg3933□WAG-71H21  
ctg4828□ctg138□ctg3933□WAG-121F9  
ctg4828□ctg138□ctg436□WAG-14D22  
ctg4828□ctg138□ctg436□WAG-15E18  
ctg4828□ctg138□ctg436□WAG-21H2  
ctg4828□ctg138□ctg436□WAG-23B4  
ctg4828□ctg138□ctg436□WAG-26L13  
ctg4828□ctg138□ctg436□WAG-29F18  
ctg4828□ctg138□ctg436□WAG-40A12  
ctg4828□ctg138□ctg436□WAG-53P8  
ctg4828□ctg138□ctg436□WAG-57O4  
ctg4828□ctg138□ctg436□WAG-73B19  
ctg4828□ctg138□ctg436□WAG-75D18  
ctg4828□ctg138□ctg436□WAG-104O3  
ctg4828□ctg138□ctg436□WAG-111N12  
ctg4828□ctg138□ctg436□WAG-118O15  
ctg4828□ctg138□ctg508□WAG-11B12

ctg4828□ctg138□ctg508□WAG-15K4  
ctg4828□ctg138□ctg508□WAG-80O14  
ctg4828□ctg138□ctg508□WAG-82M4  
ctg4828□ctg138□ctg508□WAG-96E2  
ctg4828□ctg138□ctg508□WAG-108M1  
ctg4828□ctg138□ctg508□WAG-114O23  
ctg4828□ctg138□ctg6183□WAG-16J11  
ctg4828□ctg138□ctg6183□WAG-89L13  
ctg4829□ctg812□□WAG-116K3  
ctg4829□ctg812□ctg2161□WAG-59O15  
ctg4829□ctg812□ctg2161□WAG-94K11  
ctg4829□ctg812□ctg2161□WAG-118C7  
ctg4829□ctg812□ctg800□WAG-5F14  
ctg4829□ctg812□ctg800□WAG-26I23  
ctg4829□ctg812□ctg800□WAG-64L10  
ctg4829□ctg812□ctg800□WAG-99G13  
ctg4829□ctg812□ctg800□WAG-120L4  
ctg4829□ctg812□ctg800□WAG-129L12  
ctg483□□□WAG-3C4  
ctg483□□□WAG-56P19  
ctg483□ctg2337□□WAG-119J7  
ctg483□ctg2337□ctg2900□WAG-48H7  
ctg483□ctg2337□ctg2900□WAG-78F20  
ctg483□ctg2337□ctg2900□WAG-115J23  
ctg483□ctg4911□ctg5243□WAG-77G10  
ctg483□ctg4911□ctg5243□WAG-91D7  
ctg483□ctg5853□□WAG-86F8  
ctg483□ctg5853□□WAG-114L19  
ctg4830□ctg698□□WAG-16C2  
ctg4830□ctg698□□WAG-53O2  
ctg4830□ctg698□□WAG-56O10  
ctg4830□ctg698□□WAG-64N6  
ctg4830□ctg698□□WAG-103A8  
ctg4830□ctg698□□WAG-110P19  
ctg4830□ctg698□ctg1766□WAG-11M18  
ctg4830□ctg698□ctg1766□WAG-14C13  
ctg4830□ctg698□ctg1766□WAG-26H7  
ctg4830□ctg698□ctg1766□WAG-37M23  
ctg4830□ctg698□ctg1766□WAG-48B4  
ctg4830□ctg698□ctg1766□WAG-52L11  
ctg4830□ctg698□ctg1766□WAG-75L16  
ctg4830□ctg698□ctg1766□WAG-128E23  
ctg4830□ctg698□ctg1766□WAG-130H5  
ctg4830□ctg698□ctg3525□WAG-14A10  
ctg4830□ctg698□ctg3525□WAG-112D3  
ctg4830□ctg698□ctg3525□WAG-117I10  
ctg4830□ctg698□ctg6075□WAG-13A4  
ctg4830□ctg698□ctg6075□WAG-62M12  
ctg4830□ctg698□ctg980□WAG-44P10  
ctg4830□ctg698□ctg980□WAG-50I22  
ctg4830□ctg698□ctg980□WAG-52M11  
ctg4830□ctg698□ctg980□WAG-93B10  
ctg4830□ctg698□ctg980□WAG-103B8  
ctg4830□ctg698□ctg980□WAG-115F2  
ctg4830□ctg698□ctg980□WAG-127I17  
ctg4831□□□WAG-2E17

ctg4831□□□WAG-72M21  
ctg4831□□□WAG-86M12  
ctg4831□ctg453□ctg1149□WAG-3B14  
ctg4831□ctg453□ctg1149□WAG-13C11  
ctg4831□ctg453□ctg1149□WAG-32C6  
ctg4831□ctg453□ctg1149□WAG-56E24  
ctg4831□ctg453□ctg1149□WAG-68M2  
ctg4831□ctg453□ctg1149□WAG-89I14  
ctg4831□ctg453□ctg1149□WAG-105F11  
ctg4831□ctg453□ctg1149□WAG-121L17  
ctg4831□ctg453□ctg5086□WAG-71C1  
ctg4831□ctg453□ctg5086□WAG-120F5  
ctg4831□ctg453□ctg6883□WAG-46J20  
ctg4831□ctg453□ctg6883□WAG-97O17  
ctg4831□ctg923□□WAG-41L8  
ctg4831□ctg923□□WAG-57B7  
ctg4831□ctg923□□WAG-85F22  
ctg4831□ctg923□ctg1182□WAG-14P24  
ctg4831□ctg923□ctg1182□WAG-56H23  
ctg4831□ctg923□ctg1182□WAG-66N22  
ctg4831□ctg923□ctg1182□WAG-68G8  
ctg4831□ctg923□ctg1182□WAG-84A6  
ctg4831□ctg923□ctg1182□WAG-106G17  
ctg4831□ctg923□ctg978□WAG-62B20  
ctg4831□ctg923□ctg978□WAG-67G3  
ctg4831□ctg923□ctg978□WAG-70H23  
ctg4831□ctg923□ctg978□WAG-107F11  
ctg4831□ctg923□ctg978□WAG-107N8  
ctg4831□ctg923□ctg978□WAG-107P19  
ctg4831□ctg923□ctg978□WAG-122E1  
ctg4831□ctg923□ctg978□WAG-128M19  
ctg4832□□□WAG-37G9  
ctg4832□□□WAG-87M7  
ctg4832□□□WAG-90E22  
ctg4832□□□WAG-94D20  
ctg4832□□□WAG-106H16  
ctg4832□ctg3940□□WAG-26C14  
ctg4832□ctg3940□□WAG-103K15  
ctg4832□ctg3940□ctg5184□WAG-18J14  
ctg4832□ctg3940□ctg5184□WAG-92J11  
ctg4832□ctg482□□WAG-106A16  
ctg4832□ctg482□ctg391□WAG-30B23  
ctg4832□ctg482□ctg391□WAG-32G18  
ctg4832□ctg482□ctg391□WAG-40P7  
ctg4832□ctg482□ctg391□WAG-66C23  
ctg4832□ctg482□ctg391□WAG-96G8  
ctg4832□ctg482□ctg391□WAG-97I13  
ctg4832□ctg482□ctg391□WAG-103J14  
ctg4832□ctg794□□WAG-15M9  
ctg4832□ctg794□□WAG-95P8  
ctg4832□ctg794□□WAG-100G12  
ctg4832□ctg794□□WAG-123P15  
ctg4832□ctg794□□WAG-127P1  
ctg4832□ctg794□ctg844□WAG-20E5  
ctg4832□ctg794□ctg844□WAG-34M4  
ctg4832□ctg794□ctg844□WAG-55G23

ctg4832□ctg794□ctg844□WAG-77G22  
ctg4832□ctg794□ctg844□WAG-82C21  
ctg4832□ctg794□ctg844□WAG-106F11  
ctg4833□□□WAG-3L20  
ctg4833□ctg4256□□WAG-110N11  
ctg4833□ctg4256□ctg6588□WAG-123K3  
ctg4833□ctg4256□ctg6588□WAG-130F11  
ctg4833□ctg94□□WAG-43P15  
ctg4833□ctg94□□WAG-55I19  
ctg4833□ctg94□□WAG-103E3  
ctg4833□ctg94□ctg1221□WAG-2B10  
ctg4833□ctg94□ctg1221□WAG-19L12  
ctg4833□ctg94□ctg1221□WAG-89F10  
ctg4833□ctg94□ctg1221□WAG-126G5  
ctg4833□ctg94□ctg81□WAG-14G15  
ctg4833□ctg94□ctg81□WAG-23F17  
ctg4833□ctg94□ctg81□WAG-42A20  
ctg4833□ctg94□ctg81□WAG-72F10  
ctg4833□ctg94□ctg81□WAG-78M4  
ctg4833□ctg94□ctg81□WAG-84K20  
ctg4833□ctg94□ctg81□WAG-112J24  
ctg4833□ctg94□ctg81□WAG-126I19  
ctg4834□□□WAG-68B8  
ctg4834□□□WAG-110H3  
ctg4834□□□WAG-125F14  
ctg4834□ctg1258□ctg1098□WAG-21J1  
ctg4834□ctg1258□ctg1098□WAG-37L3  
ctg4834□ctg1258□ctg1098□WAG-75C17  
ctg4834□ctg1258□ctg1098□WAG-106H12  
ctg4834□ctg1258□ctg1098□WAG-117L17  
ctg4834□ctg989□ctg835□WAG-70A24  
ctg4834□ctg989□ctg835□WAG-96J11  
ctg4834□ctg989□ctg835□WAG-99H5  
ctg4834□ctg989□ctg835□WAG-117E13  
ctg4835□ctg1618□□WAG-12L8  
ctg4835□ctg1618□□WAG-40G19  
ctg4835□ctg1618□ctg3116□WAG-121K21  
ctg4835□ctg1618□ctg3116□WAG-127H24  
ctg4835□ctg1618□ctg6668□WAG-9F24  
ctg4835□ctg1618□ctg6668□WAG-64C24  
ctg4836□□□WAG-43B3  
ctg4836□ctg329□□WAG-26G14  
ctg4836□ctg329□□WAG-61M15  
ctg4836□ctg329□ctg310□WAG-11O9  
ctg4836□ctg329□ctg310□WAG-21A11  
ctg4836□ctg329□ctg310□WAG-41C20  
ctg4836□ctg329□ctg310□WAG-49E3  
ctg4836□ctg329□ctg310□WAG-54A20  
ctg4836□ctg329□ctg310□WAG-76D2  
ctg4836□ctg329□ctg310□WAG-97J21  
ctg4836□ctg329□ctg310□WAG-101P5  
ctg4836□ctg4537□ctg4673□WAG-22D18  
ctg4836□ctg4537□ctg4673□WAG-100K7  
ctg4837□ctg1285□ctg1893□WAG-10J8  
ctg4837□ctg1285□ctg1893□WAG-69F17  
ctg4837□ctg1285□ctg1893□WAG-80O21

ctg4837□ctg1285□ctg1893□WAG-106J7  
ctg4837□ctg1285□ctg1893□WAG-109O21  
ctg4837□ctg1285□ctg2816□WAG-4I18  
ctg4837□ctg1285□ctg2816□WAG-17J13  
ctg4837□ctg1285□ctg2816□WAG-103F9  
ctg4837□ctg1285□ctg4421□WAG-4N12  
ctg4837□ctg1285□ctg4421□WAG-5D15  
ctg4837□ctg2977□ctg2960□WAG-57G23  
ctg4837□ctg2977□ctg2960□WAG-99M14  
ctg4837□ctg2977□ctg2960□WAG-110D5  
ctg4837□ctg4787□ctg5012□WAG-58B11  
ctg4837□ctg4787□ctg5012□WAG-101E24  
ctg4837□ctg5022□ctg5514□WAG-45E4  
ctg4837□ctg5022□ctg5514□WAG-45K3  
ctg4838□ctg2593□□WAG-15P16  
ctg4838□ctg2593□ctg5741□WAG-1K16  
ctg4838□ctg2593□ctg5741□WAG-29G11  
ctg4838□ctg2593□ctg6865□WAG-30C1  
ctg4838□ctg2593□ctg6865□WAG-51I11  
ctg4838□ctg325□□WAG-66L7  
ctg4838□ctg325□ctg535□WAG-31A6  
ctg4838□ctg325□ctg535□WAG-47O11  
ctg4838□ctg325□ctg535□WAG-51A9  
ctg4838□ctg325□ctg535□WAG-61M19  
ctg4838□ctg325□ctg535□WAG-70I16  
ctg4838□ctg325□ctg535□WAG-85M19  
ctg4838□ctg325□ctg535□WAG-86G19  
ctg4838□ctg325□ctg535□WAG-95D19  
ctg4838□ctg325□ctg535□WAG-117H11  
ctg4838□ctg325□ctg535□WAG-118M21  
ctg4838□ctg325□ctg535□WAG-120A19  
ctg4838□ctg325□ctg535□WAG-125P6  
ctg4838□ctg325□ctg989□WAG-33I15  
ctg4838□ctg325□ctg989□WAG-52J14  
ctg4838□ctg325□ctg989□WAG-59F18  
ctg4838□ctg325□ctg989□WAG-88B21  
ctg4838□ctg325□ctg989□WAG-100P22  
ctg4838□ctg325□ctg989□WAG-115N21  
ctg4839□ctg5513□ctg6631□WAG-72O19  
ctg4839□ctg5513□ctg6631□WAG-106B11  
ctg484□□□WAG-72L5  
ctg484□ctg1332□□WAG-7K18  
ctg484□ctg1332□□WAG-14A13  
ctg484□ctg1332□□WAG-16C17  
ctg484□ctg1332□□WAG-47D24  
ctg484□ctg1332□□WAG-50E3  
ctg484□ctg1332□□WAG-87B23  
ctg484□ctg1332□ctg2488□WAG-9G10  
ctg484□ctg1332□ctg2488□WAG-71K10  
ctg484□ctg1332□ctg2488□WAG-105A18  
ctg484□ctg1332□ctg3016□WAG-65H9  
ctg484□ctg1332□ctg3016□WAG-107B22  
ctg484□ctg1332□ctg3016□WAG-112A22  
ctg484□ctg1332□ctg3016□WAG-127L9  
ctg4840□□□WAG-3E21  
ctg4840□□□WAG-73A14

ctg4840□ctg1969□ctg1818□WAG-11L22  
ctg4840□ctg1969□ctg1818□WAG-60G13  
ctg4840□ctg1969□ctg1818□WAG-68A23  
ctg4840□ctg1969□ctg1818□WAG-106B4  
ctg4840□ctg1969□ctg1818□WAG-110I11  
ctg4840□ctg1969□ctg1818□WAG-129E2  
ctg4840□ctg4261□□WAG-94M15  
ctg4840□ctg4261□ctg6249□WAG-5B16  
ctg4840□ctg4261□ctg6249□WAG-110F21  
ctg4840□ctg4261□ctg6773□WAG-24O23  
ctg4840□ctg4261□ctg6773□WAG-35H3  
ctg4840□ctg547□ctg1077□WAG-5M14  
ctg4840□ctg547□ctg1077□WAG-7C22  
ctg4840□ctg547□ctg1077□WAG-26H18  
ctg4840□ctg547□ctg1077□WAG-30F15  
ctg4840□ctg547□ctg1077□WAG-32F1  
ctg4840□ctg547□ctg1077□WAG-36N23  
ctg4840□ctg547□ctg1077□WAG-74H22  
ctg4840□ctg547□ctg1077□WAG-81O5  
ctg4840□ctg547□ctg1077□WAG-96J6  
ctg4840□ctg547□ctg1077□WAG-123K4  
ctg4840□ctg547□ctg4778□WAG-31L12  
ctg4840□ctg547□ctg4778□WAG-38K14  
ctg4840□ctg547□ctg5255□WAG-48H10  
ctg4840□ctg547□ctg5255□WAG-48H12  
ctg4840□ctg547□ctg783□WAG-13G9  
ctg4840□ctg547□ctg783□WAG-14P9  
ctg4840□ctg547□ctg783□WAG-24G16  
ctg4840□ctg547□ctg783□WAG-34H2  
ctg4840□ctg547□ctg783□WAG-52M7  
ctg4840□ctg547□ctg783□WAG-79P3  
ctg4840□ctg547□ctg783□WAG-81G15  
ctg4840□ctg547□ctg783□WAG-91B8  
ctg4840□ctg547□ctg783□WAG-91E20  
ctg4840□ctg547□ctg783□WAG-96F7  
ctg4840□ctg547□ctg783□WAG-96H7  
ctg4840□ctg547□ctg783□WAG-98D4  
ctg4840□ctg547□ctg783□WAG-114C11  
ctg4840□ctg547□ctg783□WAG-116M2  
ctg4840□ctg547□ctg783□WAG-120B5  
ctg4841□□□WAG-92A8  
ctg4841□ctg140□ctg158□WAG-11F2  
ctg4841□ctg140□ctg158□WAG-23P4  
ctg4841□ctg140□ctg158□WAG-45B6  
ctg4841□ctg140□ctg158□WAG-47A14  
ctg4841□ctg140□ctg158□WAG-65F9  
ctg4841□ctg140□ctg158□WAG-68J20  
ctg4841□ctg140□ctg158□WAG-71A3  
ctg4841□ctg140□ctg158□WAG-79P8  
ctg4841□ctg140□ctg158□WAG-104F5  
ctg4841□ctg140□ctg158□WAG-106E14  
ctg4841□ctg140□ctg950□WAG-22E7  
ctg4841□ctg140□ctg950□WAG-38K19  
ctg4841□ctg140□ctg950□WAG-39B11  
ctg4841□ctg140□ctg950□WAG-62O14  
ctg4841□ctg140□ctg950□WAG-69A16



ctg4841□ctg140□ctg950□WAG-83N18  
ctg4841□ctg140□ctg950□WAG-107J19  
ctg4841□ctg140□ctg950□WAG-114A19  
ctg4841□ctg140□ctg950□WAG-121I14  
ctg4841□ctg140□ctg950□WAG-125C17  
ctg4841□ctg140□ctg950□WAG-126K13  
ctg4841□ctg1746□□WAG-14D6  
ctg4841□ctg1746□ctg3277□WAG-11J23  
ctg4841□ctg1746□ctg3277□WAG-25P14  
ctg4841□ctg1746□ctg3277□WAG-44B4  
ctg4841□ctg1746□ctg3277□WAG-87N6  
ctg4841□ctg1746□ctg3277□WAG-88P13  
ctg4841□ctg1746□ctg3277□WAG-98J23  
ctg4841□ctg1746□ctg3277□WAG-100A15  
ctg4841□ctg1746□ctg3576□WAG-56L16  
ctg4841□ctg1746□ctg3576□WAG-105G23  
ctg4841□ctg1746□ctg3576□WAG-124F8  
ctg4842□ctg458□□WAG-74G7  
ctg4842□ctg458□□WAG-74L3  
ctg4842□ctg458□ctg2945□WAG-56L17  
ctg4842□ctg458□ctg2945□WAG-71D17  
ctg4842□ctg458□ctg2945□WAG-78F5  
ctg4842□ctg458□ctg491□WAG-33C17  
ctg4842□ctg458□ctg491□WAG-51L10  
ctg4842□ctg458□ctg491□WAG-66D20  
ctg4842□ctg458□ctg491□WAG-69B18  
ctg4842□ctg458□ctg491□WAG-79E8  
ctg4842□ctg458□ctg491□WAG-83G17  
ctg4842□ctg458□ctg491□WAG-91F4  
ctg4842□ctg458□ctg491□WAG-104J16  
ctg4843□□□WAG-1J19  
ctg4843□□□WAG-12F23  
ctg4843□□□WAG-40G10  
ctg4843□□□WAG-90K21  
ctg4843□ctg1028□ctg1553□WAG-25J4  
ctg4843□ctg1028□ctg1553□WAG-42O1  
ctg4843□ctg1028□ctg1553□WAG-48K2  
ctg4843□ctg1028□ctg1553□WAG-52G7  
ctg4843□ctg1028□ctg1553□WAG-82E15  
ctg4843□ctg1028□ctg1553□WAG-86N15  
ctg4843□ctg1028□ctg1553□WAG-98F8  
ctg4843□ctg1028□ctg1553□WAG-116M5  
ctg4843□ctg285□□WAG-18N3  
ctg4843□ctg285□□WAG-30G24  
ctg4843□ctg285□ctg220□WAG-7C1  
ctg4843□ctg285□ctg220□WAG-13N15  
ctg4843□ctg285□ctg220□WAG-32C5  
ctg4843□ctg285□ctg220□WAG-32N18  
ctg4843□ctg285□ctg220□WAG-32P10  
ctg4843□ctg285□ctg220□WAG-39H6  
ctg4843□ctg285□ctg220□WAG-50L21  
ctg4843□ctg285□ctg220□WAG-64J22  
ctg4843□ctg285□ctg220□WAG-67B4  
ctg4843□ctg285□ctg220□WAG-67N14  
ctg4843□ctg285□ctg220□WAG-79D16  
ctg4843□ctg285□ctg220□WAG-90L10

ctg4843□ctg285□ctg220□WAG-99K10  
ctg4843□ctg285□ctg220□WAG-103H13  
ctg4843□ctg285□ctg220□WAG-104O21  
ctg4843□ctg285□ctg220□WAG-105P3  
ctg4843□ctg285□ctg220□WAG-108H9  
ctg4843□ctg285□ctg220□WAG-108P11  
ctg4843□ctg285□ctg220□WAG-112N1  
ctg4843□ctg285□ctg220□WAG-114K15  
ctg4843□ctg285□ctg220□WAG-119I24  
ctg4843□ctg285□ctg220□WAG-120E10  
ctg4843□ctg285□ctg220□WAG-120H3  
ctg4843□ctg285□ctg220□WAG-122M13  
ctg4843□ctg571□ctg1647□WAG-24M3  
ctg4843□ctg571□ctg1647□WAG-26P17  
ctg4843□ctg571□ctg1647□WAG-47E20  
ctg4843□ctg571□ctg1647□WAG-48I10  
ctg4843□ctg571□ctg1647□WAG-50H16  
ctg4843□ctg571□ctg1647□WAG-96D6  
ctg4843□ctg571□ctg1647□WAG-101L24  
ctg4843□ctg571□ctg1647□WAG-109N3  
ctg4843□ctg571□ctg1647□WAG-114C4  
ctg4843□ctg571□ctg3186□WAG-17A2  
ctg4843□ctg571□ctg3186□WAG-65A11  
ctg4843□ctg571□ctg3186□WAG-68B10  
ctg4843□ctg571□ctg3186□WAG-88L3  
ctg4843□ctg571□ctg596□WAG-40O8  
ctg4843□ctg571□ctg596□WAG-61C3  
ctg4843□ctg571□ctg596□WAG-70K13  
ctg4843□ctg571□ctg596□WAG-85D4  
ctg4843□ctg571□ctg596□WAG-86F24  
ctg4844□□□WAG-120K14  
ctg4844□ctg270□□WAG-39G20  
ctg4844□ctg270□□WAG-66F11  
ctg4844□ctg270□ctg354□WAG-2O23  
ctg4844□ctg270□ctg354□WAG-13K6  
ctg4844□ctg270□ctg354□WAG-17J9  
ctg4844□ctg270□ctg354□WAG-22I5  
ctg4844□ctg270□ctg354□WAG-61J21  
ctg4844□ctg270□ctg354□WAG-66D10  
ctg4844□ctg270□ctg354□WAG-90J14  
ctg4844□ctg270□ctg354□WAG-92P11  
ctg4844□ctg270□ctg354□WAG-107D12  
ctg4844□ctg270□ctg354□WAG-119E2  
ctg4844□ctg270□ctg354□WAG-125C24  
ctg4844□ctg270□ctg4098□WAG-79N1  
ctg4844□ctg270□ctg4098□WAG-105C13  
ctg4844□ctg270□ctg4098□WAG-116D1  
ctg4844□ctg270□ctg644□WAG-38K17  
ctg4844□ctg270□ctg644□WAG-72L21  
ctg4844□ctg270□ctg644□WAG-87K11  
ctg4844□ctg270□ctg644□WAG-116G22  
ctg4844□ctg270□ctg644□WAG-122E11  
ctg4844□ctg270□ctg6455□WAG-47B9  
ctg4844□ctg270□ctg6455□WAG-107D24  
ctg4845□□□WAG-105B17  
ctg4845□ctg5305□ctg6154□WAG-3H16

ctg4845□ctg5305□ctg6154□WAG-107D18  
ctg4846□□□WAG-95B11  
ctg4846□ctg4264□□WAG-33D3  
ctg4846□ctg4264□□WAG-45F15  
ctg4846□ctg4264□□WAG-92D24  
ctg4847□□□WAG-92B4  
ctg4847□ctg2487□□WAG-19I8  
ctg4847□ctg2487□□WAG-94G23  
ctg4847□ctg2487□□WAG-94H21  
ctg4847□ctg2487□ctg3484□WAG-23B14  
ctg4847□ctg2487□ctg3484□WAG-101C6  
ctg4847□ctg2487□ctg3484□WAG-119L16  
ctg4847□ctg2487□ctg3484□WAG-126I23  
ctg4847□ctg2487□ctg5757□WAG-11O12  
ctg4847□ctg2487□ctg5757□WAG-62M9  
ctg4848□□□WAG-3G12  
ctg4848□□□WAG-36F21  
ctg4848□ctg1477□□WAG-36C22  
ctg4848□ctg1477□□WAG-53H2  
ctg4848□ctg1477□ctg1740□WAG-9M1  
ctg4848□ctg1477□ctg1740□WAG-17O6  
ctg4848□ctg1477□ctg1740□WAG-43E18  
ctg4848□ctg1477□ctg1740□WAG-108H22  
ctg4848□ctg1477□ctg1740□WAG-119C9  
ctg4848□ctg1477□ctg3746□WAG-65C12  
ctg4848□ctg1477□ctg3746□WAG-71A6  
ctg4848□ctg1477□ctg3746□WAG-123H10  
ctg4849□□□WAG-100D13  
ctg4849□ctg1800□ctg1695□WAG-18P16  
ctg4849□ctg1800□ctg1695□WAG-38G6  
ctg4849□ctg1800□ctg1695□WAG-83P24  
ctg4849□ctg1800□ctg1695□WAG-104M1  
ctg4849□ctg1800□ctg1695□WAG-114B13  
ctg4849□ctg1800□ctg1695□WAG-115L20  
ctg4849□ctg1800□ctg1695□WAG-128J11  
ctg4849□ctg1800□ctg2757□WAG-74M18  
ctg4849□ctg1800□ctg2757□WAG-102K7  
ctg4849□ctg1800□ctg2757□WAG-119J5  
ctg485□□□WAG-35N13  
ctg485□ctg1296□□WAG-41C8  
ctg485□ctg1296□□WAG-72M14  
ctg485□ctg1296□ctg1925□WAG-13M11  
ctg485□ctg1296□ctg1925□WAG-21F24  
ctg485□ctg1296□ctg1925□WAG-40B10  
ctg485□ctg1296□ctg1925□WAG-88E14  
ctg485□ctg1296□ctg1925□WAG-93E4  
ctg485□ctg1296□ctg1925□WAG-123B23  
ctg4850□□□WAG-102J5  
ctg4850□ctg210□ctg280□WAG-22A13  
ctg4850□ctg210□ctg280□WAG-26O9  
ctg4850□ctg210□ctg280□WAG-29P22  
ctg4850□ctg210□ctg280□WAG-30D15  
ctg4850□ctg210□ctg280□WAG-49C10  
ctg4850□ctg210□ctg280□WAG-50P20  
ctg4850□ctg210□ctg280□WAG-53N6  
ctg4850□ctg210□ctg280□WAG-55K3

ctg4850□ctg210□ctg280□WAG-61I4  
ctg4850□ctg210□ctg280□WAG-61J10  
ctg4850□ctg210□ctg280□WAG-78F6  
ctg4850□ctg210□ctg280□WAG-79A13  
ctg4850□ctg210□ctg280□WAG-92D14  
ctg4850□ctg210□ctg280□WAG-104A24  
ctg4850□ctg210□ctg280□WAG-108O16  
ctg4850□ctg210□ctg280□WAG-122O15  
ctg4850□ctg210□ctg280□WAG-130D5  
ctg4851□□□WAG-34P17  
ctg4851□ctg1940□□WAG-2D15  
ctg4851□ctg1940□□WAG-18G18  
ctg4851□ctg1940□□WAG-72A13  
ctg4851□ctg1940□□WAG-118D7  
ctg4851□ctg1940□□WAG-130E4  
ctg4851□ctg1940□ctg3248□WAG-9H5  
ctg4851□ctg1940□ctg3248□WAG-48P9  
ctg4851□ctg1940□ctg3248□WAG-92K16  
ctg4851□ctg421□□WAG-3A3  
ctg4851□ctg421□ctg1361□WAG-21F14  
ctg4851□ctg421□ctg1361□WAG-37A23  
ctg4851□ctg421□ctg1361□WAG-55E22  
ctg4851□ctg421□ctg1361□WAG-59C20  
ctg4851□ctg421□ctg1361□WAG-66D17  
ctg4851□ctg421□ctg1361□WAG-97F24  
ctg4851□ctg421□ctg1361□WAG-111H21  
ctg4851□ctg421□ctg1361□WAG-113D9  
ctg4851□ctg421□ctg438□WAG-6J21  
ctg4851□ctg421□ctg438□WAG-16H5  
ctg4851□ctg421□ctg438□WAG-34A24  
ctg4851□ctg421□ctg438□WAG-36M18  
ctg4851□ctg421□ctg438□WAG-43C12  
ctg4851□ctg421□ctg438□WAG-58K15  
ctg4851□ctg421□ctg438□WAG-59N23  
ctg4851□ctg421□ctg438□WAG-96I24  
ctg4851□ctg421□ctg438□WAG-101G6  
ctg4851□ctg421□ctg438□WAG-111H7  
ctg4851□ctg421□ctg438□WAG-111O16  
ctg4852□□□WAG-39M19  
ctg4852□□□WAG-81A12  
ctg4852□□□WAG-122O3  
ctg4852□ctg115□□WAG-15G13  
ctg4852□ctg115□□WAG-16A15  
ctg4852□ctg115□□WAG-108A10  
ctg4852□ctg115□ctg2327□WAG-27B18  
ctg4852□ctg115□ctg2327□WAG-65A9  
ctg4852□ctg115□ctg2327□WAG-88I16  
ctg4852□ctg115□ctg6338□WAG-39E15  
ctg4852□ctg115□ctg6338□WAG-59F11  
ctg4852□ctg115□ctg770□WAG-3H3  
ctg4852□ctg115□ctg770□WAG-40F13  
ctg4852□ctg115□ctg770□WAG-44P17  
ctg4852□ctg115□ctg770□WAG-48N15  
ctg4852□ctg115□ctg770□WAG-72G20  
ctg4852□ctg115□ctg770□WAG-87M6  
ctg4852□ctg115□ctg770□WAG-115A19

ctg4853□□□WAG-37M19  
ctg4853□□□WAG-66G1  
ctg4853□□□WAG-128G22  
ctg4853□ctg236□□WAG-101F13  
ctg4853□ctg236□ctg191□WAG-41K10  
ctg4853□ctg236□ctg191□WAG-96F12  
ctg4853□ctg236□ctg191□WAG-102A16  
ctg4853□ctg236□ctg191□WAG-110B19  
ctg4853□ctg236□ctg191□WAG-127H17  
ctg4853□ctg236□ctg191□WAG-130G9  
ctg4853□ctg236□ctg3604□WAG-76A6  
ctg4853□ctg236□ctg3604□WAG-116L20  
ctg4853□ctg236□ctg3604□WAG-125M21  
ctg4853□ctg236□ctg5372□WAG-69J9  
ctg4853□ctg236□ctg5372□WAG-124K20  
ctg4853□ctg4851□ctg5129□WAG-8E8  
ctg4853□ctg4851□ctg5129□WAG-123G21  
ctg4854□ctg1024□□WAG-54H18  
ctg4854□ctg1024□□WAG-110C5  
ctg4854□ctg1024□ctg1178□WAG-12J7  
ctg4854□ctg1024□ctg1178□WAG-55O24  
ctg4854□ctg1024□ctg1178□WAG-90H13  
ctg4854□ctg1024□ctg1178□WAG-104A10  
ctg4854□ctg1024□ctg1178□WAG-123J23  
ctg4855□□□WAG-67E7  
ctg4855□□□WAG-73M11  
ctg4855□□□WAG-124G16  
ctg4855□ctg320□□WAG-85N15  
ctg4855□ctg320□ctg407□WAG-17A9  
ctg4855□ctg320□ctg407□WAG-36N9  
ctg4855□ctg320□ctg407□WAG-37F22  
ctg4855□ctg320□ctg407□WAG-45F8  
ctg4855□ctg320□ctg407□WAG-49K17  
ctg4855□ctg320□ctg407□WAG-65F8  
ctg4855□ctg320□ctg407□WAG-68D11  
ctg4855□ctg320□ctg407□WAG-75G18  
ctg4855□ctg320□ctg407□WAG-87B7  
ctg4855□ctg320□ctg407□WAG-87O18  
ctg4855□ctg320□ctg407□WAG-106F18  
ctg4855□ctg320□ctg407□WAG-114N15  
ctg4855□ctg320□ctg407□WAG-115K20  
ctg4855□ctg320□ctg407□WAG-116B15  
ctg4855□ctg320□ctg407□WAG-125N1  
ctg4855□ctg320□ctg407□WAG-128A7  
ctg4856□□□WAG-7O2  
ctg4856□□□WAG-54P23  
ctg4856□□□WAG-68O2  
ctg4856□□□WAG-83C3  
ctg4856□ctg256□ctg260□WAG-5P2  
ctg4856□ctg256□ctg260□WAG-12M17  
ctg4856□ctg256□ctg260□WAG-40O9  
ctg4856□ctg256□ctg260□WAG-49K5  
ctg4856□ctg256□ctg260□WAG-50C1  
ctg4856□ctg256□ctg260□WAG-50G13  
ctg4856□ctg256□ctg260□WAG-58G17  
ctg4856□ctg256□ctg260□WAG-77P9

ctg4856□ctg256□ctg260□WAG-80F13  
ctg4856□ctg256□ctg260□WAG-85F5  
ctg4856□ctg256□ctg260□WAG-92K15  
ctg4856□ctg256□ctg260□WAG-113A12  
ctg4856□ctg256□ctg260□WAG-122H15  
ctg4856□ctg256□ctg4582□WAG-97E10  
ctg4856□ctg256□ctg4582□WAG-128B8  
ctg4856□ctg256□ctg6089□WAG-14M6  
ctg4856□ctg256□ctg6089□WAG-25A23  
ctg4856□ctg6600□□WAG-36B5  
ctg4856□ctg6600□□WAG-66N19  
ctg4856□ctg6600□ctg455□WAG-12H15  
ctg4856□ctg6600□ctg455□WAG-25M8  
ctg4856□ctg6600□ctg455□WAG-27N15  
ctg4856□ctg6600□ctg455□WAG-60L6  
ctg4856□ctg6600□ctg455□WAG-63G11  
ctg4856□ctg6600□ctg455□WAG-64B20  
ctg4856□ctg6600□ctg455□WAG-74N18  
ctg4856□ctg6600□ctg455□WAG-81D13  
ctg4856□ctg6600□ctg455□WAG-102J3  
ctg4856□ctg6600□ctg455□WAG-113P24  
ctg4856□ctg6600□ctg482□WAG-5B20  
ctg4856□ctg6600□ctg482□WAG-25C11  
ctg4856□ctg6600□ctg482□WAG-31F1  
ctg4856□ctg6600□ctg482□WAG-42B5  
ctg4856□ctg6600□ctg482□WAG-48E19  
ctg4856□ctg6600□ctg482□WAG-58I14  
ctg4856□ctg6600□ctg482□WAG-86I19  
ctg4856□ctg6600□ctg482□WAG-88A12  
ctg4856□ctg6600□ctg482□WAG-95M6  
ctg4856□ctg6600□ctg482□WAG-114B15  
ctg4857□ctg1787□ctg2176□WAG-23G12  
ctg4857□ctg1787□ctg2176□WAG-82D10  
ctg4857□ctg1787□ctg2176□WAG-85M23  
ctg4857□ctg1787□ctg2176□WAG-95N7  
ctg4857□ctg1787□ctg2608□WAG-34C21  
ctg4857□ctg1787□ctg2608□WAG-41B12  
ctg4857□ctg1787□ctg2608□WAG-108B8  
ctg4857□ctg1787□ctg2608□WAG-116O12  
ctg4858□□□WAG-19J10  
ctg4858□□□WAG-34A5  
ctg4858□□□WAG-59O8  
ctg4858□□□WAG-91B14  
ctg4858□□□WAG-97A20  
ctg4858□ctg393□□WAG-51D24  
ctg4858□ctg393□□WAG-93H2  
ctg4858□ctg393□□WAG-98G9  
ctg4858□ctg393□□WAG-107H11  
ctg4858□ctg393□ctg1435□WAG-16C15  
ctg4858□ctg393□ctg1435□WAG-28L23  
ctg4858□ctg393□ctg1435□WAG-51B12  
ctg4858□ctg393□ctg1435□WAG-56G23  
ctg4858□ctg393□ctg1435□WAG-59G4  
ctg4858□ctg393□ctg1435□WAG-60H18  
ctg4858□ctg393□ctg1435□WAG-70L2  
ctg4858□ctg393□ctg1435□WAG-72F20

ctg4858□ctg393□ctg1435□WAG-73H16  
ctg4858□ctg393□ctg1435□WAG-75H11  
ctg4858□ctg393□ctg1435□WAG-96N6  
ctg4858□ctg393□ctg1435□WAG-107A5  
ctg4858□ctg393□ctg1435□WAG-109B11  
ctg4858□ctg393□ctg1435□WAG-125P24  
ctg4858□ctg393□ctg300□WAG-9B24  
ctg4858□ctg393□ctg300□WAG-10F24  
ctg4858□ctg393□ctg300□WAG-39N10  
ctg4858□ctg393□ctg300□WAG-45H10  
ctg4858□ctg393□ctg300□WAG-63O16  
ctg4858□ctg393□ctg300□WAG-65F21  
ctg4858□ctg393□ctg300□WAG-67H6  
ctg4858□ctg393□ctg300□WAG-70N10  
ctg4858□ctg393□ctg300□WAG-76C3  
ctg4858□ctg393□ctg300□WAG-77J10  
ctg4858□ctg393□ctg300□WAG-84L12  
ctg4858□ctg393□ctg300□WAG-88K24  
ctg4858□ctg5794□□WAG-7D21  
ctg4858□ctg5794□□WAG-105E7  
ctg4859□□□WAG-35L8  
ctg4859□□□WAG-101M2  
ctg4859□□□WAG-107D7  
ctg4859□ctg278□□WAG-66A4  
ctg4859□ctg278□□WAG-104I4  
ctg4859□ctg278□ctg1483□WAG-54L22  
ctg4859□ctg278□ctg1483□WAG-58A7  
ctg4859□ctg278□ctg1483□WAG-74D2  
ctg4859□ctg278□ctg1483□WAG-75B16  
ctg4859□ctg278□ctg1483□WAG-90I19  
ctg4859□ctg278□ctg1483□WAG-91H6  
ctg4859□ctg278□ctg1483□WAG-98N6  
ctg4859□ctg278□ctg1483□WAG-100I20  
ctg4859□ctg278□ctg277□WAG-4O5  
ctg4859□ctg278□ctg277□WAG-19I2  
ctg4859□ctg278□ctg277□WAG-21F5  
ctg4859□ctg278□ctg277□WAG-32J18  
ctg4859□ctg278□ctg277□WAG-40G7  
ctg4859□ctg278□ctg277□WAG-54D13  
ctg4859□ctg278□ctg277□WAG-57H4  
ctg4859□ctg278□ctg277□WAG-58G1  
ctg4859□ctg278□ctg277□WAG-66M9  
ctg4859□ctg278□ctg277□WAG-76A12  
ctg4859□ctg278□ctg277□WAG-88L2  
ctg4859□ctg278□ctg277□WAG-103M5  
ctg4859□ctg278□ctg277□WAG-125D20  
ctg486□□□WAG-20G22  
ctg486□□□WAG-44E7  
ctg486□□□WAG-92N23  
ctg486□ctg1338□□WAG-69E24  
ctg486□ctg1338□□WAG-71B14  
ctg486□ctg1338□ctg1761□WAG-39B18  
ctg486□ctg1338□ctg1761□WAG-43A19  
ctg486□ctg1338□ctg1761□WAG-56N6  
ctg486□ctg1338□ctg1761□WAG-127O1  
ctg486□ctg1338□ctg2006□WAG-5D14

ctg486□ctg1338□ctg2006□WAG-9F10  
ctg486□ctg1338□ctg2006□WAG-24N2  
ctg486□ctg1338□ctg2006□WAG-91P20  
ctg486□ctg1338□ctg4586□WAG-51I20  
ctg486□ctg1338□ctg4586□WAG-85K20  
ctg486□ctg1338□ctg4709□WAG-71L3  
ctg486□ctg1338□ctg4709□WAG-83L18  
ctg4860□ctg2□□WAG-127D24  
ctg4860□ctg2□ctg2□WAG-9N19  
ctg4860□ctg2□ctg2□WAG-11A8  
ctg4860□ctg2□ctg2□WAG-18G17  
ctg4860□ctg2□ctg2□WAG-19P3  
ctg4860□ctg2□ctg2□WAG-39F14  
ctg4860□ctg2□ctg2□WAG-48L8  
ctg4860□ctg2□ctg2□WAG-49H13  
ctg4860□ctg2□ctg2□WAG-52N10  
ctg4860□ctg2□ctg2□WAG-55A17  
ctg4860□ctg2□ctg2□WAG-68I14  
ctg4860□ctg2□ctg2□WAG-82P12  
ctg4860□ctg2□ctg2□WAG-83O13  
ctg4860□ctg2□ctg2□WAG-93C5  
ctg4860□ctg2□ctg2□WAG-104A6  
ctg4860□ctg2□ctg2□WAG-105A20  
ctg4860□ctg2□ctg2□WAG-109B1  
ctg4860□ctg2□ctg2□WAG-110K12  
ctg4860□ctg2□ctg2□WAG-111L8  
ctg4860□ctg2□ctg2□WAG-118D14  
ctg4860□ctg2□ctg2□WAG-123G17  
ctg4860□ctg2□ctg2□WAG-124N11  
ctg4860□ctg2□ctg2□WAG-125B8  
ctg4860□ctg2□ctg2□WAG-126K10  
ctg4860□ctg2□ctg2□WAG-127A11  
ctg4861□ctg5180□ctg5880□WAG-100H17  
ctg4861□ctg5180□ctg5880□WAG-128N19  
ctg4862□□□WAG-9E17  
ctg4862□□□WAG-35A18  
ctg4862□□□WAG-71L17  
ctg4862□□□WAG-111H10  
ctg4862□ctg217□□WAG-4L18  
ctg4862□ctg217□□WAG-31D2  
ctg4862□ctg217□ctg296□WAG-8N9  
ctg4862□ctg217□ctg296□WAG-11A20  
ctg4862□ctg217□ctg296□WAG-20L16  
ctg4862□ctg217□ctg296□WAG-47B16  
ctg4862□ctg217□ctg296□WAG-50K14  
ctg4862□ctg217□ctg296□WAG-55D19  
ctg4862□ctg217□ctg296□WAG-60L1  
ctg4862□ctg217□ctg296□WAG-61O23  
ctg4862□ctg217□ctg296□WAG-70C20  
ctg4862□ctg217□ctg296□WAG-71K16  
ctg4862□ctg217□ctg296□WAG-72B1  
ctg4862□ctg217□ctg296□WAG-72J20  
ctg4862□ctg217□ctg296□WAG-99O14  
ctg4862□ctg217□ctg296□WAG-110A14  
ctg4862□ctg217□ctg3511□WAG-57K5  
ctg4862□ctg217□ctg3511□WAG-60F14



ctg4862□ctg217□ctg3511□WAG-110J9  
ctg4863□□□WAG-2B4  
ctg4863□□□WAG-45P20  
ctg4863□ctg4365□□WAG-40I4  
ctg4863□ctg4365□□WAG-41C6  
ctg4863□ctg4365□□WAG-80C17  
ctg4864□ctg252□ctg256□WAG-28E21  
ctg4864□ctg252□ctg256□WAG-33M2  
ctg4864□ctg252□ctg256□WAG-46O19  
ctg4864□ctg252□ctg256□WAG-63N21  
ctg4864□ctg252□ctg256□WAG-79C22  
ctg4864□ctg252□ctg256□WAG-80E8  
ctg4864□ctg252□ctg256□WAG-84B21  
ctg4864□ctg252□ctg256□WAG-88F17  
ctg4864□ctg252□ctg256□WAG-89H12  
ctg4864□ctg4809□ctg5058□WAG-77I12  
ctg4864□ctg4809□ctg5058□WAG-93N24  
ctg4865□ctg1223□□WAG-28L12  
ctg4865□ctg1223□□WAG-55N7  
ctg4865□ctg1223□□WAG-86B3  
ctg4865□ctg1223□ctg1544□WAG-19J7  
ctg4865□ctg1223□ctg1544□WAG-33F24  
ctg4865□ctg1223□ctg1544□WAG-49E17  
ctg4865□ctg1223□ctg1544□WAG-56L1  
ctg4865□ctg1223□ctg1544□WAG-65G15  
ctg4865□ctg1223□ctg1544□WAG-81J12  
ctg4865□ctg1223□ctg1544□WAG-101N23  
ctg4865□ctg1223□ctg1544□WAG-119H18  
ctg4865□ctg1223□ctg5373□WAG-52L18  
ctg4865□ctg1223□ctg5373□WAG-52M18  
ctg4865□ctg1315□□WAG-125F7  
ctg4865□ctg1315□ctg1528□WAG-9E16  
ctg4865□ctg1315□ctg1528□WAG-28K11  
ctg4865□ctg1315□ctg1528□WAG-67M3  
ctg4865□ctg1315□ctg1528□WAG-75A19  
ctg4865□ctg1315□ctg1528□WAG-111J24  
ctg4865□ctg1315□ctg1528□WAG-118G3  
ctg4865□ctg1315□ctg3651□WAG-68N6  
ctg4865□ctg1315□ctg3651□WAG-113K24  
ctg4865□ctg1315□ctg3651□WAG-122J4  
ctg4866□ctg1195□□WAG-82L13  
ctg4866□ctg1195□ctg2276□WAG-12F5  
ctg4866□ctg1195□ctg2276□WAG-50N1  
ctg4866□ctg1195□ctg2276□WAG-52J21  
ctg4866□ctg1195□ctg2276□WAG-52J22  
ctg4866□ctg1195□ctg2276□WAG-70A2  
ctg4866□ctg1195□ctg2276□WAG-107H20  
ctg4866□ctg1195□ctg2276□WAG-129B8  
ctg4866□ctg3209□□WAG-44L14  
ctg4866□ctg3209□ctg3236□WAG-122D13  
ctg4866□ctg3209□ctg3236□WAG-123D8  
ctg4866□ctg3209□ctg3236□WAG-125O15  
ctg4866□ctg3209□ctg4547□WAG-78K20  
ctg4866□ctg3209□ctg4547□WAG-127M18  
ctg4867□ctg1725□ctg1567□WAG-15M5  
ctg4867□ctg1725□ctg1567□WAG-36A12

ctg4867□ctg1725□ctg1567□WAG-55O10  
ctg4867□ctg1725□ctg1567□WAG-74A10  
ctg4867□ctg1725□ctg1567□WAG-94C24  
ctg4867□ctg1725□ctg1567□WAG-102E10  
ctg4867□ctg1725□ctg1567□WAG-126A12  
ctg4868□□□WAG-24P10  
ctg4868□□□WAG-33H20  
ctg4868□□□WAG-90P20  
ctg4868□□□WAG-106B21  
ctg4868□ctg1062□ctg5133□WAG-2K22  
ctg4868□ctg1062□ctg5133□WAG-85O5  
ctg4868□ctg1062□ctg6257□WAG-94E16  
ctg4868□ctg1062□ctg6257□WAG-123K10  
ctg4868□ctg1062□ctg903□WAG-17C17  
ctg4868□ctg1062□ctg903□WAG-20D8  
ctg4868□ctg1062□ctg903□WAG-28J14  
ctg4868□ctg1062□ctg903□WAG-32G13  
ctg4868□ctg1062□ctg903□WAG-48O24  
ctg4868□ctg1062□ctg903□WAG-53O9  
ctg4868□ctg1062□ctg903□WAG-64L15  
ctg4868□ctg1666□□WAG-62F8  
ctg4868□ctg1666□ctg2028□WAG-49G2  
ctg4868□ctg1666□ctg2028□WAG-52H7  
ctg4868□ctg1666□ctg2028□WAG-59N10  
ctg4868□ctg1666□ctg2028□WAG-99K18  
ctg4868□ctg1666□ctg2028□WAG-123G14  
ctg4868□ctg1666□ctg2028□WAG-125E1  
ctg4869□□□WAG-80G12  
ctg4869□□□WAG-84I23  
ctg4869□ctg368□□WAG-48C2  
ctg4869□ctg368□ctg366□WAG-5M11  
ctg4869□ctg368□ctg366□WAG-7F23  
ctg4869□ctg368□ctg366□WAG-28I16  
ctg4869□ctg368□ctg366□WAG-31D13  
ctg4869□ctg368□ctg366□WAG-32A13  
ctg4869□ctg368□ctg366□WAG-62D10  
ctg4869□ctg368□ctg366□WAG-72P13  
ctg4869□ctg905□□WAG-25M15  
ctg4869□ctg905□□WAG-73B22  
ctg4869□ctg905□□WAG-93F2  
ctg4869□ctg905□ctg1895□WAG-3C14  
ctg4869□ctg905□ctg1895□WAG-17C3  
ctg4869□ctg905□ctg1895□WAG-21L11  
ctg4869□ctg905□ctg1895□WAG-51J13  
ctg4869□ctg905□ctg1895□WAG-56C15  
ctg4869□ctg905□ctg1895□WAG-62B18  
ctg4869□ctg905□ctg1895□WAG-130J24  
ctg4869□ctg905□ctg2784□WAG-43M21  
ctg4869□ctg905□ctg2784□WAG-62D9  
ctg4869□ctg905□ctg2784□WAG-102I12  
ctg4869□ctg905□ctg2784□WAG-123L19  
ctg4869□ctg905□ctg949□WAG-16N10  
ctg4869□ctg905□ctg949□WAG-43J1  
ctg4869□ctg905□ctg949□WAG-57H12  
ctg4869□ctg905□ctg949□WAG-65N16  
ctg4869□ctg905□ctg949□WAG-73O8

ctg4869□ctg905□ctg949□WAG-76L16  
ctg4869□ctg905□ctg949□WAG-83D24  
ctg4869□ctg905□ctg949□WAG-83I7  
ctg4869□ctg905□ctg949□WAG-91O12  
ctg4869□ctg905□ctg949□WAG-101L23  
ctg487□□□WAG-E11  
ctg487□□□WAG-G11  
ctg487□□□WAG-14J19  
ctg487□□□WAG-15L24  
ctg487□□□WAG-28O21  
ctg487□ctg1301□□WAG-31D24  
ctg487□ctg1301□□WAG-99F17  
ctg487□ctg1301□ctg1850□WAG-8J4  
ctg487□ctg1301□ctg1850□WAG-14A14  
ctg487□ctg1301□ctg1850□WAG-27H16  
ctg487□ctg1301□ctg1850□WAG-70E17  
ctg487□ctg1301□ctg1850□WAG-125L11  
ctg487□ctg2673□□WAG-101N5  
ctg487□ctg2673□ctg3397□WAG-71C21  
ctg487□ctg2673□ctg3397□WAG-92O20  
ctg487□ctg2673□ctg3397□WAG-113G20  
ctg487□ctg2673□ctg3397□WAG-114G4  
ctg487□ctg2673□ctg5844□WAG-86J5  
ctg487□ctg2673□ctg5844□WAG-113C9  
ctg487□ctg3837□ctg4100□WAG-82K13  
ctg487□ctg3837□ctg4100□WAG-109J17  
ctg487□ctg3837□ctg4100□WAG-119D4  
ctg487□ctg3864□□WAG-14J20  
ctg487□ctg3864□ctg5539□WAG-47M8  
ctg487□ctg3864□ctg5539□WAG-110H6  
ctg4870□□□WAG-4K11  
ctg4870□□□WAG-4N11  
ctg4870□□□WAG-52D24  
ctg4870□□□WAG-113D23  
ctg4870□ctg167□□WAG-119M18  
ctg4870□ctg167□ctg404□WAG-22G3  
ctg4870□ctg167□ctg404□WAG-23O13  
ctg4870□ctg167□ctg404□WAG-24I21  
ctg4870□ctg167□ctg404□WAG-24J3  
ctg4870□ctg167□ctg404□WAG-25N20  
ctg4870□ctg167□ctg404□WAG-27L11  
ctg4870□ctg167□ctg404□WAG-28D16  
ctg4870□ctg167□ctg404□WAG-32I13  
ctg4870□ctg167□ctg404□WAG-38A3  
ctg4870□ctg167□ctg404□WAG-44M9  
ctg4870□ctg167□ctg404□WAG-54F5  
ctg4870□ctg167□ctg404□WAG-102B2  
ctg4870□ctg167□ctg404□WAG-112O18  
ctg4870□ctg167□ctg404□WAG-120J12  
ctg4870□ctg167□ctg6422□WAG-38P13  
ctg4870□ctg167□ctg6422□WAG-110A23  
ctg4871□ctg4725□□WAG-58N24  
ctg4871□ctg4725□□WAG-100A10  
ctg4871□ctg4725□□WAG-117J14  
ctg4872□□□WAG-1E16  
ctg4872□□□WAG-99G3

ctg4872□ctg1141□ctg1319□WAG-27N19  
ctg4872□ctg1141□ctg1319□WAG-37A13  
ctg4872□ctg1141□ctg1319□WAG-47P6  
ctg4872□ctg1141□ctg1319□WAG-62N19  
ctg4872□ctg1141□ctg1319□WAG-69B12  
ctg4872□ctg1141□ctg1319□WAG-71J12  
ctg4872□ctg1141□ctg1319□WAG-80L10  
ctg4872□ctg1141□ctg1319□WAG-89O21  
ctg4872□ctg1141□ctg1319□WAG-90C4  
ctg4872□ctg1141□ctg1319□WAG-92P5  
ctg4872□ctg1141□ctg1319□WAG-100H15  
ctg4872□ctg1141□ctg2679□WAG-44G23  
ctg4872□ctg1141□ctg2679□WAG-68F21  
ctg4872□ctg1141□ctg2679□WAG-73B18  
ctg4872□ctg1141□ctg2679□WAG-87B13  
ctg4872□ctg1141□ctg2679□WAG-96F17  
ctg4872□ctg1141□ctg2679□WAG-112N13  
ctg4872□ctg1141□ctg2679□WAG-112O10  
ctg4872□ctg1141□ctg5804□WAG-49N17  
ctg4872□ctg1141□ctg5804□WAG-68H12  
ctg4873□ctg2427□□WAG-68I8  
ctg4873□ctg2427□ctg3023□WAG-33D22  
ctg4873□ctg2427□ctg3023□WAG-52N5  
ctg4873□ctg2427□ctg3023□WAG-88G1  
ctg4874□□□WAG-48F12  
ctg4874□□□WAG-125J21  
ctg4874□□□WAG-129P1  
ctg4874□ctg1489□□WAG-26J12  
ctg4874□ctg1489□□WAG-59D9  
ctg4874□ctg1489□□WAG-71B7  
ctg4874□ctg1489□□WAG-82G17  
ctg4874□ctg1489□ctg1340□WAG-18A19  
ctg4874□ctg1489□ctg1340□WAG-48A5  
ctg4874□ctg1489□ctg1340□WAG-88B20  
ctg4874□ctg1489□ctg1340□WAG-105O9  
ctg4874□ctg1489□ctg1340□WAG-110D23  
ctg4874□ctg1489□ctg1340□WAG-116J4  
ctg4874□ctg1567□□WAG-64O14  
ctg4874□ctg1567□ctg1407□WAG-15C3  
ctg4874□ctg1567□ctg1407□WAG-15I7  
ctg4874□ctg1567□ctg1407□WAG-47H1  
ctg4874□ctg1567□ctg1407□WAG-61G12  
ctg4874□ctg1567□ctg1407□WAG-104C11  
ctg4874□ctg1567□ctg1407□WAG-130L16  
ctg4874□ctg1567□ctg3128□WAG-28M3  
ctg4874□ctg1567□ctg3128□WAG-30A23  
ctg4874□ctg1567□ctg3128□WAG-102H12  
ctg4874□ctg2619□ctg2582□WAG-10P12  
ctg4874□ctg2619□ctg2582□WAG-77D11  
ctg4874□ctg2619□ctg2582□WAG-90A22  
ctg4874□ctg2619□ctg2582□WAG-90E5  
ctg4874□ctg2989□□WAG-72P2  
ctg4874□ctg2989□□WAG-86G6  
ctg4874□ctg2989□ctg4072□WAG-32P7  
ctg4874□ctg2989□ctg4072□WAG-56G22  
ctg4874□ctg2989□ctg4102□WAG-23M10

ctg4874□ctg2989□ctg4102□WAG-97D20  
ctg4874□ctg2989□ctg4102□WAG-99O3  
ctg4874□ctg739□ctg750□WAG-25G22  
ctg4874□ctg739□ctg750□WAG-45D17  
ctg4874□ctg739□ctg750□WAG-48B13  
ctg4874□ctg739□ctg750□WAG-51L15  
ctg4874□ctg739□ctg750□WAG-69K22  
ctg4874□ctg739□ctg750□WAG-72E21  
ctg4874□ctg739□ctg750□WAG-81A6  
ctg4874□ctg739□ctg750□WAG-84H8  
ctg4874□ctg739□ctg750□WAG-93D9  
ctg4874□ctg739□ctg750□WAG-102G17  
ctg4874□ctg739□ctg750□WAG-104G4  
ctg4874□ctg739□ctg750□WAG-119O9  
ctg4874□ctg777□ctg2482□WAG-4C24  
ctg4874□ctg777□ctg2482□WAG-23K10  
ctg4874□ctg777□ctg2482□WAG-45G21  
ctg4874□ctg777□ctg2482□WAG-102M14  
ctg4874□ctg777□ctg631□WAG-8I23  
ctg4874□ctg777□ctg631□WAG-23B16  
ctg4874□ctg777□ctg631□WAG-27N23  
ctg4874□ctg777□ctg631□WAG-63D6  
ctg4874□ctg777□ctg631□WAG-112A21  
ctg4874□ctg777□ctg631□WAG-122A20  
ctg4875□ctg1547□□WAG-128G6  
ctg4875□ctg1547□ctg1842□WAG-19E21  
ctg4875□ctg1547□ctg1842□WAG-32F6  
ctg4875□ctg1547□ctg1842□WAG-41P17  
ctg4875□ctg1547□ctg1842□WAG-84H10  
ctg4875□ctg1547□ctg1842□WAG-99L24  
ctg4875□ctg1547□ctg5500□WAG-50M22  
ctg4875□ctg1547□ctg5500□WAG-99L13  
ctg4875□ctg3512□ctg3641□WAG-60A3  
ctg4875□ctg3512□ctg3641□WAG-85M18  
ctg4875□ctg3512□ctg3641□WAG-129I5  
ctg4876□□□WAG-33C2  
ctg4876□□□WAG-92C8  
ctg4876□ctg1564□□WAG-45I16  
ctg4876□ctg1564□□WAG-120H8  
ctg4876□ctg1564□ctg1654□WAG-25I1  
ctg4876□ctg1564□ctg1654□WAG-77P14  
ctg4876□ctg1564□ctg1654□WAG-101O14  
ctg4876□ctg338□□WAG-19B20  
ctg4876□ctg338□□WAG-30L15  
ctg4876□ctg338□□WAG-30O18  
ctg4876□ctg338□ctg434□WAG-47A23  
ctg4876□ctg338□ctg434□WAG-53L15  
ctg4876□ctg338□ctg434□WAG-56B13  
ctg4876□ctg338□ctg434□WAG-64L7  
ctg4876□ctg338□ctg434□WAG-68G4  
ctg4876□ctg338□ctg434□WAG-71F8  
ctg4876□ctg338□ctg434□WAG-80K12  
ctg4876□ctg338□ctg434□WAG-89G6  
ctg4876□ctg338□ctg434□WAG-94N6  
ctg4876□ctg338□ctg434□WAG-116J6  
ctg4876□ctg338□ctg434□WAG-121C19

ctg4876□ctg338□ctg772□WAG-43I11  
ctg4876□ctg338□ctg772□WAG-51M15  
ctg4876□ctg338□ctg772□WAG-53I23  
ctg4876□ctg338□ctg772□WAG-75P24  
ctg4876□ctg338□ctg772□WAG-106D2  
ctg4876□ctg338□ctg772□WAG-118N13  
ctg4877□□□WAG-27L6  
ctg4877□□□WAG-41C14  
ctg4877□□□WAG-62D4  
ctg4877□ctg2536□□WAG-8D13  
ctg4877□ctg2536□□WAG-63B9  
ctg4877□ctg2536□ctg4261□WAG-89L7  
ctg4877□ctg2536□ctg4261□WAG-123D12  
ctg4877□ctg2536□ctg6716□WAG-11A6  
ctg4877□ctg2536□ctg6716□WAG-16H21  
ctg4877□ctg291□□WAG-3D14  
ctg4877□ctg291□□WAG-10B4  
ctg4877□ctg291□ctg509□WAG-13E24  
ctg4877□ctg291□ctg509□WAG-59I9  
ctg4877□ctg291□ctg509□WAG-79B15  
ctg4877□ctg291□ctg509□WAG-81D11  
ctg4877□ctg291□ctg509□WAG-107C18  
ctg4877□ctg291□ctg509□WAG-108N16  
ctg4877□ctg291□ctg509□WAG-117E16  
ctg4877□ctg291□ctg509□WAG-125E10  
ctg4877□ctg291□ctg931□WAG-41C15  
ctg4877□ctg291□ctg931□WAG-49F19  
ctg4877□ctg291□ctg931□WAG-61F16  
ctg4877□ctg291□ctg931□WAG-79M6  
ctg4877□ctg291□ctg931□WAG-92N13  
ctg4877□ctg4900□ctg5226□WAG-41O3  
ctg4877□ctg4900□ctg5226□WAG-60I5  
ctg4877□ctg70□ctg76□WAG-4O10  
ctg4877□ctg70□ctg76□WAG-9K13  
ctg4877□ctg70□ctg76□WAG-17H5  
ctg4877□ctg70□ctg76□WAG-20J16  
ctg4877□ctg70□ctg76□WAG-22H19  
ctg4877□ctg70□ctg76□WAG-23G22  
ctg4877□ctg70□ctg76□WAG-24L24  
ctg4877□ctg70□ctg76□WAG-26I12  
ctg4877□ctg70□ctg76□WAG-26J16  
ctg4877□ctg70□ctg76□WAG-29J15  
ctg4877□ctg70□ctg76□WAG-30K14  
ctg4877□ctg70□ctg76□WAG-40J23  
ctg4877□ctg70□ctg76□WAG-41E14  
ctg4877□ctg70□ctg76□WAG-41F14  
ctg4877□ctg70□ctg76□WAG-47F2  
ctg4877□ctg70□ctg76□WAG-84P4  
ctg4877□ctg70□ctg76□WAG-93A14  
ctg4877□ctg70□ctg76□WAG-97N13  
ctg4877□ctg70□ctg76□WAG-107P20  
ctg4877□ctg70□ctg76□WAG-109F19  
ctg4877□ctg70□ctg76□WAG-110E20  
ctg4877□ctg70□ctg76□WAG-121B9  
ctg4877□ctg71□□WAG-59B24  
ctg4877□ctg71□ctg54□WAG-8O9

ctg4877□ctg71□ctg54□WAG-12N1  
ctg4877□ctg71□ctg54□WAG-36K5  
ctg4877□ctg71□ctg54□WAG-55P5  
ctg4877□ctg71□ctg54□WAG-58G13  
ctg4877□ctg71□ctg54□WAG-70J1  
ctg4877□ctg71□ctg54□WAG-76M15  
ctg4877□ctg71□ctg54□WAG-79H22  
ctg4877□ctg71□ctg54□WAG-86E3  
ctg4877□ctg71□ctg54□WAG-114I12  
ctg4877□ctg71□ctg54□WAG-120C7  
ctg4877□ctg71□ctg54□WAG-124P16  
ctg4878□□□WAG-107L24  
ctg4878□ctg1303□□WAG-13M17  
ctg4878□ctg1303□□WAG-36O10  
ctg4878□ctg1303□□WAG-97F12  
ctg4878□ctg1303□ctg1473□WAG-23M23  
ctg4878□ctg1303□ctg1473□WAG-30O11  
ctg4878□ctg1303□ctg1473□WAG-40A18  
ctg4878□ctg1303□ctg1473□WAG-80A4  
ctg4878□ctg1303□ctg1473□WAG-81J9  
ctg4878□ctg1303□ctg1473□WAG-87E23  
ctg4878□ctg1303□ctg1473□WAG-116D6  
ctg4879□□□WAG-11L4  
ctg4879□□□WAG-91F9  
ctg4879□ctg506□□WAG-3K17  
ctg4879□ctg506□□WAG-5D17  
ctg4879□ctg506□□WAG-44J13  
ctg4879□ctg506□ctg684□WAG-5P20  
ctg4879□ctg506□ctg684□WAG-33A6  
ctg4879□ctg506□ctg684□WAG-36B15  
ctg4879□ctg506□ctg684□WAG-75H10  
ctg4879□ctg506□ctg684□WAG-84D23  
ctg4879□ctg506□ctg684□WAG-103J11  
ctg4879□ctg506□ctg684□WAG-112B24  
ctg4879□ctg506□ctg684□WAG-127D23  
ctg488□□□WAG-93N13  
ctg488□ctg1102□□WAG-53D4  
ctg488□ctg1102□ctg1279□WAG-10H12  
ctg488□ctg1102□ctg1279□WAG-43M3  
ctg488□ctg1102□ctg1279□WAG-86H23  
ctg488□ctg1102□ctg1279□WAG-89O11  
ctg4880□□□WAG-47F18  
ctg4880□□□WAG-73H21  
ctg4880□ctg423□ctg442□WAG-25L7  
ctg4880□ctg423□ctg442□WAG-34M19  
ctg4880□ctg423□ctg442□WAG-48J11  
ctg4880□ctg423□ctg442□WAG-79O4  
ctg4880□ctg423□ctg442□WAG-86B17  
ctg4880□ctg423□ctg442□WAG-104P16  
ctg4880□ctg423□ctg442□WAG-119J8  
ctg4881□ctg1447□□WAG-6A11  
ctg4881□ctg1447□ctg1577□WAG-52I5  
ctg4881□ctg1447□ctg1577□WAG-72L23  
ctg4881□ctg1447□ctg1577□WAG-80A6  
ctg4881□ctg1447□ctg1577□WAG-87M14  
ctg4881□ctg1447□ctg1577□WAG-127E22

ctg4882□□□WAG-34F2  
ctg4882□□□WAG-85I20  
ctg4882□ctg614□ctg645□WAG-14L16  
ctg4882□ctg614□ctg645□WAG-29I19  
ctg4882□ctg614□ctg645□WAG-34F8  
ctg4882□ctg614□ctg645□WAG-68I21  
ctg4882□ctg614□ctg645□WAG-78M11  
ctg4882□ctg614□ctg645□WAG-86J2  
ctg4882□ctg614□ctg645□WAG-119O10  
ctg4882□ctg614□ctg645□WAG-121E4  
ctg4882□ctg874□□WAG-84C7  
ctg4882□ctg874□ctg862□WAG-30F13  
ctg4882□ctg874□ctg862□WAG-62I22  
ctg4882□ctg874□ctg862□WAG-66C14  
ctg4882□ctg874□ctg862□WAG-107F1  
ctg4882□ctg874□ctg862□WAG-109L5  
ctg4883□ctg4214□□WAG-15L13  
ctg4883□ctg4214□ctg6068□WAG-63P22  
ctg4883□ctg4214□ctg6068□WAG-95B17  
ctg4884□□□WAG-119N10  
ctg4884□ctg1933□□WAG-63P18  
ctg4884□ctg1933□□WAG-110B17  
ctg4884□ctg1933□ctg1771□WAG-9L4  
ctg4884□ctg1933□ctg1771□WAG-25D3  
ctg4884□ctg1933□ctg1771□WAG-35J11  
ctg4884□ctg1933□ctg1771□WAG-40N12  
ctg4884□ctg1933□ctg1771□WAG-82E14  
ctg4884□ctg2937□□WAG-15H24  
ctg4884□ctg2937□□WAG-81O1  
ctg4884□ctg2937□ctg4931□WAG-54M20  
ctg4884□ctg2937□ctg4931□WAG-111N3  
ctg4884□ctg4226□ctg4438□WAG-32E14  
ctg4884□ctg4226□ctg4438□WAG-52J17  
ctg4884□ctg5390□ctg6365□WAG-14M23  
ctg4884□ctg5390□ctg6365□WAG-116L16  
ctg4884□ctg5681□□WAG-45L5  
ctg4884□ctg5681□□WAG-114D14  
ctg4884□ctg6136□□WAG-46G5  
ctg4884□ctg6136□□WAG-87C23  
ctg4885□□□WAG-5A5  
ctg4885□□□WAG-26D3  
ctg4885□□□WAG-31B15  
ctg4885□ctg3347□□WAG-5J11  
ctg4885□ctg3347□□WAG-73I18  
ctg4885□ctg3347□ctg4534□WAG-22B1  
ctg4885□ctg3347□ctg4534□WAG-108E9  
ctg4885□ctg4893□ctg5217□WAG-23L21  
ctg4885□ctg4893□ctg5217□WAG-77D8  
ctg4886□□□WAG-82M18  
ctg4886□□□WAG-102L6  
ctg4886□ctg515□□WAG-45K18  
ctg4886□ctg515□ctg746□WAG-6F15  
ctg4886□ctg515□ctg746□WAG-28E12  
ctg4886□ctg515□ctg746□WAG-45E17  
ctg4886□ctg515□ctg746□WAG-52G4  
ctg4886□ctg515□ctg746□WAG-58G15



ctg4886□ctg515□ctg746□WAG-60P3  
ctg4886□ctg515□ctg746□WAG-66L23  
ctg4886□ctg515□ctg746□WAG-75M22  
ctg4886□ctg515□ctg746□WAG-117A13  
ctg4886□ctg515□ctg746□WAG-121E7  
ctg4886□ctg515□ctg746□WAG-127I8  
ctg4886□ctg515□ctg746□WAG-129D4  
ctg4887□□□WAG-93D13  
ctg4887□ctg251□□WAG-32O10  
ctg4887□ctg251□□WAG-47C13  
ctg4887□ctg251□□WAG-101A3  
ctg4887□ctg251□ctg198□WAG-7L9  
ctg4887□ctg251□ctg198□WAG-10E11  
ctg4887□ctg251□ctg198□WAG-11K11  
ctg4887□ctg251□ctg198□WAG-16A7  
ctg4887□ctg251□ctg198□WAG-24K9  
ctg4887□ctg251□ctg198□WAG-26I9  
ctg4887□ctg251□ctg198□WAG-27C22  
ctg4887□ctg251□ctg198□WAG-30E16  
ctg4887□ctg251□ctg198□WAG-31D22  
ctg4887□ctg251□ctg198□WAG-36J21  
ctg4887□ctg251□ctg198□WAG-40K17  
ctg4887□ctg251□ctg198□WAG-40M10  
ctg4887□ctg251□ctg198□WAG-43C21  
ctg4887□ctg251□ctg198□WAG-47H12  
ctg4887□ctg251□ctg198□WAG-54L2  
ctg4887□ctg251□ctg198□WAG-58G20  
ctg4887□ctg251□ctg198□WAG-69C3  
ctg4887□ctg251□ctg198□WAG-69M6  
ctg4887□ctg251□ctg198□WAG-78H20  
ctg4887□ctg251□ctg198□WAG-82I15  
ctg4887□ctg251□ctg198□WAG-84P8  
ctg4887□ctg251□ctg198□WAG-88I23  
ctg4887□ctg251□ctg198□WAG-90H1  
ctg4887□ctg251□ctg198□WAG-95D24  
ctg4887□ctg251□ctg198□WAG-103G24  
ctg4887□ctg251□ctg198□WAG-105D16  
ctg4887□ctg251□ctg198□WAG-109D3  
ctg4887□ctg251□ctg198□WAG-117I23  
ctg4887□ctg251□ctg198□WAG-118O13  
ctg4887□ctg251□ctg198□WAG-121O6  
ctg4887□ctg251□ctg198□WAG-128H23  
ctg4887□ctg251□ctg198□WAG-128K2  
ctg4887□ctg251□ctg198□WAG-130P5  
ctg4888□□□WAG-107L11  
ctg4888□ctg2180□□WAG-86E5  
ctg4888□ctg2180□□WAG-99C13  
ctg4888□ctg2180□ctg2345□WAG-9E19  
ctg4888□ctg2180□ctg2345□WAG-26J18  
ctg4888□ctg2180□ctg2345□WAG-53E7  
ctg4888□ctg2180□ctg2345□WAG-54D23  
ctg4888□ctg2180□ctg2345□WAG-73C1  
ctg4888□ctg2180□ctg2345□WAG-75D14  
ctg4888□ctg2180□ctg2345□WAG-100F21  
ctg4888□ctg2180□ctg2345□WAG-112I5  
ctg4888□ctg3357□□WAG-122L17

ctg4888□ctg3357□□WAG-123O8  
ctg4888□ctg3357□ctg6931□WAG-70I15  
ctg4888□ctg3357□ctg6931□WAG-128O11  
ctg4889□□□WAG-18C10  
ctg4889□ctg2377□□WAG-54I8  
ctg4889□ctg2377□ctg3074□WAG-12K2  
ctg4889□ctg2377□ctg3074□WAG-28I22  
ctg4889□ctg2377□ctg3074□WAG-105E15  
ctg489□ctg1344□□WAG-57A20  
ctg489□ctg1344□□WAG-99M12  
ctg489□ctg1344□ctg1248□WAG-71E12  
ctg489□ctg1344□ctg1248□WAG-76B2  
ctg489□ctg1344□ctg1248□WAG-86E1  
ctg489□ctg1344□ctg1248□WAG-102P15  
ctg489□ctg1344□ctg1248□WAG-104G20  
ctg4890□ctg3625□ctg3810□WAG-99H14  
ctg4890□ctg3625□ctg3810□WAG-130P6  
ctg4891□ctg117□□WAG-36B17  
ctg4891□ctg117□ctg112□WAG-12A7  
ctg4891□ctg117□ctg112□WAG-38B23  
ctg4891□ctg117□ctg112□WAG-53H4  
ctg4891□ctg117□ctg112□WAG-56N15  
ctg4891□ctg117□ctg112□WAG-58H17  
ctg4891□ctg117□ctg112□WAG-91L21  
ctg4891□ctg117□ctg112□WAG-96G12  
ctg4891□ctg117□ctg112□WAG-99C16  
ctg4891□ctg117□ctg112□WAG-105E3  
ctg4891□ctg117□ctg112□WAG-110L24  
ctg4891□ctg117□ctg112□WAG-113K15  
ctg4891□ctg117□ctg112□WAG-114L3  
ctg4891□ctg117□ctg112□WAG-121O4  
ctg4891□ctg117□ctg2852□WAG-34D18  
ctg4891□ctg117□ctg2852□WAG-87C2  
ctg4891□ctg117□ctg2852□WAG-103K21  
ctg4891□ctg117□ctg440□WAG-6O10  
ctg4891□ctg117□ctg440□WAG-19D18  
ctg4891□ctg117□ctg440□WAG-23P7  
ctg4891□ctg117□ctg440□WAG-52B22  
ctg4891□ctg117□ctg440□WAG-53K16  
ctg4891□ctg117□ctg440□WAG-69G4  
ctg4891□ctg117□ctg440□WAG-81A4  
ctg4891□ctg117□ctg440□WAG-105P14  
ctg4891□ctg2169□ctg2044□WAG-41I20  
ctg4891□ctg2169□ctg2044□WAG-43K4  
ctg4891□ctg2169□ctg2044□WAG-76D11  
ctg4891□ctg2407□ctg2306□WAG-50D4  
ctg4891□ctg2407□ctg2306□WAG-73K6  
ctg4891□ctg2407□ctg2306□WAG-112I20  
ctg4892□□□WAG-51I8  
ctg4892□□□WAG-52I12  
ctg4892□ctg1797□□WAG-110L7  
ctg4892□ctg1797□ctg2121□WAG-26P7  
ctg4892□ctg1797□ctg2121□WAG-106H17  
ctg4892□ctg3548□□WAG-40N5  
ctg4892□ctg3548□ctg4610□WAG-110N16  
ctg4892□ctg3548□ctg4610□WAG-121G1

ctg4893□□□WAG-48K22  
ctg4893□□□WAG-54P3  
ctg4893□□□WAG-85A14  
ctg4893□ctg2500□□WAG-27P5  
ctg4893□ctg2500□□WAG-30A9  
ctg4893□ctg2500□□WAG-46I17  
ctg4893□ctg2500□□WAG-93E18  
ctg4893□ctg2500□ctg3944□WAG-87H11  
ctg4893□ctg2500□ctg3944□WAG-98B19  
ctg4893□ctg2500□ctg3944□WAG-119I2  
ctg4893□ctg335□□WAG-84C9  
ctg4893□ctg335□□WAG-95B10  
ctg4893□ctg335□ctg333□WAG-19J5  
ctg4893□ctg335□ctg333□WAG-28F8  
ctg4893□ctg335□ctg333□WAG-61A17  
ctg4893□ctg335□ctg333□WAG-121C23  
ctg4893□ctg335□ctg333□WAG-125L23  
ctg4893□ctg335□ctg333□WAG-126O15  
ctg4893□ctg335□ctg3780□WAG-38C21  
ctg4893□ctg335□ctg3780□WAG-48F6  
ctg4893□ctg335□ctg3780□WAG-88P18  
ctg4893□ctg335□ctg3780□WAG-93M16  
ctg4893□ctg335□ctg3780□WAG-116N22  
ctg4893□ctg335□ctg858□WAG-25O15  
ctg4893□ctg335□ctg858□WAG-31D10  
ctg4893□ctg335□ctg858□WAG-72K3  
ctg4893□ctg335□ctg858□WAG-108L13  
ctg4893□ctg335□ctg858□WAG-116M17  
ctg4893□ctg335□ctg858□WAG-122O19  
ctg4893□ctg335□ctg858□WAG-130P19  
ctg4894□□□WAG-26K17  
ctg4894□ctg314□□WAG-29F16  
ctg4894□ctg314□ctg411□WAG-41P14  
ctg4894□ctg314□ctg411□WAG-48C14  
ctg4894□ctg314□ctg411□WAG-49N14  
ctg4894□ctg314□ctg411□WAG-74K15  
ctg4894□ctg314□ctg411□WAG-75J9  
ctg4894□ctg314□ctg411□WAG-102L2  
ctg4894□ctg314□ctg411□WAG-109G23  
ctg4894□ctg314□ctg411□WAG-120D6  
ctg4894□ctg314□ctg411□WAG-129A6  
ctg4894□ctg314□ctg4482□WAG-3D15  
ctg4894□ctg314□ctg4482□WAG-65C17  
ctg4895□□□WAG-81K21  
ctg4895□□□WAG-81K23  
ctg4895□□□WAG-86O1  
ctg4895□ctg1214□□WAG-28D23  
ctg4895□ctg1214□ctg1086□WAG-25M4  
ctg4895□ctg1214□ctg1086□WAG-66M19  
ctg4895□ctg1214□ctg1086□WAG-76P21  
ctg4895□ctg1214□ctg1086□WAG-89H19  
ctg4895□ctg1214□ctg1086□WAG-118D11  
ctg4895□ctg2100□ctg1964□WAG-14O1  
ctg4895□ctg2100□ctg1964□WAG-49O18  
ctg4895□ctg2100□ctg1964□WAG-87D22  
ctg4895□ctg2100□ctg1964□WAG-88C21

ctg4895□ctg2100□ctg1964□WAG-125O12  
ctg4895□ctg2902□□WAG-28J11  
ctg4895□ctg2902□□WAG-80H19  
ctg4895□ctg2902□ctg3063□WAG-29M18  
ctg4895□ctg2902□ctg3063□WAG-53N24  
ctg4895□ctg2902□ctg3063□WAG-102O16  
ctg4895□ctg2902□ctg3063□WAG-117M10  
ctg4895□ctg2902□ctg3063□WAG-120D3  
ctg4895□ctg2902□ctg6464□WAG-87C1  
ctg4895□ctg2902□ctg6464□WAG-90B9  
ctg4895□ctg2902□ctg6607□WAG-94P13  
ctg4895□ctg2902□ctg6607□WAG-105K3  
ctg4895□ctg3560□□WAG-8I22  
ctg4895□ctg3560□□WAG-34H9  
ctg4895□ctg3560□□WAG-95G16  
ctg4895□ctg3560□ctg3725□WAG-33G12  
ctg4895□ctg3560□ctg3725□WAG-85E3  
ctg4895□ctg3560□ctg3725□WAG-94D4  
ctg4895□ctg3560□ctg3725□WAG-118E18  
ctg4895□ctg3560□ctg3725□WAG-118I17  
ctg4895□ctg4094□□WAG-114I3  
ctg4895□ctg4094□ctg5730□WAG-51M17  
ctg4895□ctg4094□ctg5730□WAG-112C20  
ctg4895□ctg4441□ctg4596□WAG-64C18  
ctg4895□ctg4441□ctg4596□WAG-71I5  
ctg4895□ctg4938□ctg5300□WAG-56F13  
ctg4895□ctg4938□ctg5300□WAG-116P6  
ctg4896□□□WAG-48P22  
ctg4896□ctg1116□ctg1257□WAG-12J4  
ctg4896□ctg1116□ctg1257□WAG-19N21  
ctg4896□ctg1116□ctg1257□WAG-29B13  
ctg4896□ctg1116□ctg1257□WAG-58E13  
ctg4896□ctg1116□ctg1257□WAG-87E2  
ctg4896□ctg1116□ctg1257□WAG-98A17  
ctg4896□ctg1116□ctg1257□WAG-113G5  
ctg4896□ctg1116□ctg1257□WAG-119P24  
ctg4896□ctg2465□□WAG-51I14  
ctg4896□ctg2465□□WAG-51P22  
ctg4896□ctg2465□ctg4351□WAG-9J19  
ctg4896□ctg2465□ctg4351□WAG-23O4  
ctg4897□□□WAG-5F8  
ctg4897□□□WAG-87F6  
ctg4897□□□WAG-112M18  
ctg4897□□□WAG-122H1  
ctg4897□ctg2167□□WAG-61J17  
ctg4897□ctg2167□ctg2653□WAG-35L3  
ctg4897□ctg2167□ctg2653□WAG-93O7  
ctg4897□ctg2167□ctg2653□WAG-96C14  
ctg4897□ctg2352□ctg3054□WAG-6M10  
ctg4897□ctg2352□ctg3054□WAG-67L17  
ctg4897□ctg2352□ctg3054□WAG-98B9  
ctg4897□ctg2352□ctg3054□WAG-109C20  
ctg4897□ctg2352□ctg3054□WAG-112F12  
ctg4897□ctg4932□ctg5288□WAG-28N1  
ctg4897□ctg4932□ctg5288□WAG-80C5  
ctg4897□ctg5152□ctg5823□WAG-23G6

ctg4897□ctg5152□ctg5823□WAG-82J8  
ctg4898□□□WAG-8N5  
ctg4898□□□WAG-28O19  
ctg4898□□□WAG-30P18  
ctg4898□□□WAG-52H13  
ctg4898□□□WAG-52J4  
ctg4898□□□WAG-95N16  
ctg4898□ctg1059□ctg4315□WAG-25H21  
ctg4898□ctg1059□ctg4315□WAG-44O10  
ctg4898□ctg1059□ctg4315□WAG-120B18  
ctg4898□ctg1059□ctg901□WAG-12F18  
ctg4898□ctg1059□ctg901□WAG-41M4  
ctg4898□ctg1059□ctg901□WAG-43L18  
ctg4898□ctg1059□ctg901□WAG-57E1  
ctg4898□ctg1059□ctg901□WAG-77J23  
ctg4898□ctg1059□ctg901□WAG-83H3  
ctg4898□ctg1059□ctg901□WAG-90P18  
ctg4898□ctg1059□ctg901□WAG-95H4  
ctg4898□ctg1059□ctg901□WAG-107I24  
ctg4898□ctg1059□ctg901□WAG-110I2  
ctg4898□ctg1059□ctg901□WAG-121I20  
ctg4898□ctg1059□ctg901□WAG-122F24  
ctg4898□ctg3065□□WAG-52A15  
ctg4898□ctg3065□□WAG-117O10  
ctg4898□ctg3065□□WAG-118I14  
ctg4898□ctg3065□ctg3706□WAG-28H15  
ctg4898□ctg3065□ctg3706□WAG-50N18  
ctg4898□ctg3065□ctg3706□WAG-110M2  
ctg4899□□□WAG-38M6  
ctg4899□□□WAG-121N4  
ctg4899□ctg48□ctg37□WAG-11J11  
ctg4899□ctg48□ctg37□WAG-14I4  
ctg4899□ctg48□ctg37□WAG-15C24  
ctg4899□ctg48□ctg37□WAG-20L18  
ctg4899□ctg48□ctg37□WAG-50A16  
ctg4899□ctg48□ctg37□WAG-55K16  
ctg4899□ctg48□ctg37□WAG-61B1  
ctg4899□ctg48□ctg37□WAG-70L5  
ctg4899□ctg48□ctg37□WAG-73G16  
ctg4899□ctg48□ctg37□WAG-80M3  
ctg4899□ctg48□ctg37□WAG-92P14  
ctg4899□ctg48□ctg37□WAG-96H14  
ctg4899□ctg48□ctg37□WAG-96L13  
ctg4899□ctg48□ctg37□WAG-113J23  
ctg4899□ctg48□ctg37□WAG-115M17  
ctg49□□□WAG-26M2  
ctg49□□□WAG-125A18  
ctg49□□□WAG-126N3  
ctg49□ctg1817□□WAG-19G20  
ctg49□ctg1817□□WAG-21D21  
ctg49□ctg1817□□WAG-66F16  
ctg49□ctg1817□□WAG-78I10  
ctg49□ctg1817□□WAG-99I20  
ctg49□ctg1817□ctg3337□WAG-32J19  
ctg49□ctg1817□ctg3337□WAG-46E7  
ctg49□ctg1817□ctg3337□WAG-86B21

ctg49□ctg1817□ctg3586□WAG-69B8  
ctg49□ctg1817□ctg3586□WAG-97K2  
ctg49□ctg1817□ctg3586□WAG-128B24  
ctg49□ctg1817□ctg6401□WAG-29O5  
ctg49□ctg1817□ctg6401□WAG-72M9  
ctg49□ctg4006□□WAG-85L15  
ctg49□ctg4006□□WAG-114N22  
ctg49□ctg4006□□WAG-115M16  
ctg49□ctg4006□ctg5538□WAG-47F13  
ctg49□ctg4006□ctg5538□WAG-116E1  
ctg49□ctg4006□ctg6821□WAG-80N4  
ctg49□ctg4006□ctg6821□WAG-122G1  
ctg49□ctg6103□□WAG-20G20  
ctg49□ctg6103□□WAG-43P17  
ctg490□□□WAG-92L11  
ctg490□ctg1511□□WAG-7K2  
ctg490□ctg1511□ctg2455□WAG-5C1  
ctg490□ctg1511□ctg2455□WAG-58O10  
ctg490□ctg1511□ctg2455□WAG-70J20  
ctg490□ctg1511□ctg2455□WAG-73E16  
ctg490□ctg1511□ctg2455□WAG-89H7  
ctg490□ctg1511□ctg2455□WAG-130L17  
ctg490□ctg2173□ctg2047□WAG-14M4  
ctg490□ctg2173□ctg2047□WAG-85H15  
ctg490□ctg2173□ctg2047□WAG-86I13  
ctg490□ctg2173□ctg2047□WAG-115I15  
ctg490□ctg5959□□WAG-87K19  
ctg490□ctg5959□□WAG-122H10  
ctg4900□ctg2220□ctg2100□WAG-44M16  
ctg4900□ctg2220□ctg2100□WAG-111F17  
ctg4900□ctg2220□ctg2100□WAG-113P9  
ctg4900□ctg2220□ctg2100□WAG-125N20  
ctg4900□ctg807□ctg1072□WAG-26N1  
ctg4900□ctg807□ctg1072□WAG-53I17  
ctg4900□ctg807□ctg1072□WAG-56G12  
ctg4900□ctg807□ctg1072□WAG-67E23  
ctg4900□ctg807□ctg1072□WAG-73K13  
ctg4900□ctg807□ctg1072□WAG-96K10  
ctg4900□ctg807□ctg1072□WAG-101N7  
ctg4900□ctg807□ctg1072□WAG-116A15  
ctg4900□ctg807□ctg1072□WAG-119L8  
ctg4900□ctg807□ctg1072□WAG-122O10  
ctg4900□ctg807□ctg1072□WAG-124D16  
ctg4900□ctg807□ctg1072□WAG-129B22  
ctg4901□ctg2475□□WAG-47F4  
ctg4901□ctg2475□ctg3212□WAG-10E6  
ctg4901□ctg2475□ctg3212□WAG-88B4  
ctg4901□ctg2475□ctg3212□WAG-129B23  
ctg4902□ctg2006□ctg2539□WAG-12F7  
ctg4902□ctg2006□ctg2539□WAG-12L13  
ctg4902□ctg2006□ctg2539□WAG-13J10  
ctg4902□ctg2006□ctg2539□WAG-123P8  
ctg4902□ctg2006□ctg5336□WAG-93N19  
ctg4902□ctg2006□ctg5336□WAG-105K20  
ctg4902□ctg43□□WAG-7I5  
ctg4902□ctg4815□ctg5076□WAG-35G19

ctg4902□ctg4815□ctg5076□WAG-94G18  
ctg4903□□□WAG-8F3  
ctg4903□□□WAG-68P9  
ctg4903□□□WAG-69L1  
ctg4903□ctg3470□□WAG-6P3  
ctg4903□ctg3470□□WAG-98L1  
ctg4903□ctg3470□□WAG-103F1  
ctg4903□ctg3470□ctg4643□WAG-36L6  
ctg4903□ctg3470□ctg4643□WAG-114O1  
ctg4903□ctg686□ctg554□WAG-32D12  
ctg4903□ctg686□ctg554□WAG-34B23  
ctg4903□ctg686□ctg554□WAG-62J2  
ctg4903□ctg686□ctg554□WAG-88M5  
ctg4903□ctg686□ctg554□WAG-127E21  
ctg4903□ctg686□ctg554□WAG-128P6  
ctg4904□ctg2544□ctg2472□WAG-10A9  
ctg4904□ctg2544□ctg2472□WAG-42G12  
ctg4904□ctg2544□ctg2472□WAG-62M8  
ctg4904□ctg2544□ctg2472□WAG-69G18  
ctg4904□ctg2544□ctg2472□WAG-77J7  
ctg4904□ctg2544□ctg2472□WAG-82K16  
ctg4904□ctg2544□ctg2472□WAG-106D19  
ctg4904□ctg2544□ctg2472□WAG-115N12  
ctg4904□ctg5□□WAG-1P13  
ctg4904□ctg5□□WAG-37B11  
ctg4904□ctg5□□WAG-42E12  
ctg4904□ctg5□□WAG-46J14  
ctg4904□ctg5□□WAG-96H15  
ctg4904□ctg5□ctg12□WAG-8H6  
ctg4904□ctg5□ctg12□WAG-9J5  
ctg4904□ctg5□ctg12□WAG-9L2  
ctg4904□ctg5□ctg12□WAG-17A13  
ctg4904□ctg5□ctg12□WAG-18E3  
ctg4904□ctg5□ctg12□WAG-20O8  
ctg4904□ctg5□ctg12□WAG-22G23  
ctg4904□ctg5□ctg12□WAG-26A6  
ctg4904□ctg5□ctg12□WAG-26D15  
ctg4904□ctg5□ctg12□WAG-32D14  
ctg4904□ctg5□ctg12□WAG-34A11  
ctg4904□ctg5□ctg12□WAG-39K8  
ctg4904□ctg5□ctg12□WAG-40J7  
ctg4904□ctg5□ctg12□WAG-46F19  
ctg4904□ctg5□ctg12□WAG-47O15  
ctg4904□ctg5□ctg12□WAG-48J21  
ctg4904□ctg5□ctg12□WAG-57J24  
ctg4904□ctg5□ctg12□WAG-58K13  
ctg4904□ctg5□ctg12□WAG-58O22  
ctg4904□ctg5□ctg12□WAG-62M23  
ctg4904□ctg5□ctg12□WAG-64F24  
ctg4904□ctg5□ctg12□WAG-67E13  
ctg4904□ctg5□ctg12□WAG-67F14  
ctg4904□ctg5□ctg12□WAG-69E14  
ctg4904□ctg5□ctg12□WAG-73D18  
ctg4904□ctg5□ctg12□WAG-75E16  
ctg4904□ctg5□ctg12□WAG-79P22  
ctg4904□ctg5□ctg12□WAG-94D2

ctg4904□ctg5□ctg12□WAG-99F24  
ctg4904□ctg5□ctg12□WAG-100A21  
ctg4904□ctg5□ctg12□WAG-105J21  
ctg4904□ctg5□ctg12□WAG-124N18  
ctg4904□ctg5□ctg2758□WAG-70E5  
ctg4904□ctg5□ctg2758□WAG-99I16  
ctg4904□ctg5□ctg2758□WAG-108L20  
ctg4904□ctg5□ctg5469□WAG-37B9  
ctg4904□ctg5□ctg5469□WAG-106N19  
ctg4905□□□WAG-34E21  
ctg4905□ctg1099□ctg1225□WAG-2H21  
ctg4905□ctg1099□ctg1225□WAG-2P13  
ctg4905□ctg1099□ctg1225□WAG-40P11  
ctg4905□ctg1099□ctg1225□WAG-46A9  
ctg4905□ctg1099□ctg1225□WAG-48G20  
ctg4905□ctg2198□□WAG-99B18  
ctg4905□ctg2198□ctg2068□WAG-11M17  
ctg4905□ctg2198□ctg2068□WAG-15D19  
ctg4905□ctg2198□ctg2068□WAG-62K4  
ctg4905□ctg2198□ctg2068□WAG-95I17  
ctg4906□ctg5695□□WAG-21L21  
ctg4906□ctg5695□□WAG-71A23  
ctg4907□□□WAG-75C24  
ctg4907□ctg1008□ctg1328□WAG-5D16  
ctg4907□ctg1008□ctg1328□WAG-21G8  
ctg4907□ctg1008□ctg1328□WAG-26K18  
ctg4907□ctg1008□ctg1328□WAG-43K24  
ctg4907□ctg1008□ctg1328□WAG-67G18  
ctg4907□ctg1008□ctg1328□WAG-82K1  
ctg4907□ctg1008□ctg1328□WAG-89F6  
ctg4907□ctg1008□ctg1328□WAG-99P9  
ctg4907□ctg1008□ctg1328□WAG-103O18  
ctg4907□ctg1008□ctg1328□WAG-128A2  
ctg4907□ctg1008□ctg1328□WAG-128H22  
ctg4907□ctg1008□ctg1328□WAG-129G22  
ctg4907□ctg1008□ctg3252□WAG-17E7  
ctg4907□ctg1008□ctg3252□WAG-25J5  
ctg4907□ctg1008□ctg3252□WAG-41I8  
ctg4907□ctg1008□ctg3252□WAG-54A19  
ctg4907□ctg3489□□WAG-16K18  
ctg4907□ctg3489□ctg3610□WAG-1F20  
ctg4907□ctg3489□ctg3610□WAG-6H5  
ctg4907□ctg3489□ctg3610□WAG-23C12  
ctg4907□ctg3489□ctg3610□WAG-61J3  
ctg4907□ctg4101□□WAG-18P4  
ctg4907□ctg4101□□WAG-73I9  
ctg4907□ctg4101□ctg5328□WAG-120G18  
ctg4907□ctg4101□ctg5328□WAG-124P5  
ctg4907□ctg5361□ctg6302□WAG-109G17  
ctg4907□ctg5361□ctg6302□WAG-110P9  
ctg4908□ctg1316□□WAG-99I19  
ctg4908□ctg1316□ctg1168□WAG-74K7  
ctg4908□ctg1316□ctg1168□WAG-81I2  
ctg4908□ctg1316□ctg1168□WAG-97N11  
ctg4908□ctg1316□ctg1168□WAG-124F19  
ctg4908□ctg1316□ctg1168□WAG-130K18



ctg4909□ctg3152□ctg3309□WAG-44O21  
ctg4909□ctg3152□ctg3309□WAG-57L23  
ctg4909□ctg3152□ctg3309□WAG-80I4  
ctg4909□ctg3152□ctg5616□WAG-11I10  
ctg4909□ctg3152□ctg5616□WAG-73I23  
ctg4909□ctg3152□ctg5923□WAG-53D2  
ctg4909□ctg3152□ctg5923□WAG-123O12  
ctg4909□ctg4219□□WAG-27B8  
ctg4909□ctg4219□□WAG-37O4  
ctg4909□ctg4219□ctg5884□WAG-17P3  
ctg4909□ctg4219□ctg5884□WAG-122J13  
ctg491□ctg1104□□WAG-15O1  
ctg491□ctg1104□ctg1904□WAG-4F6  
ctg491□ctg1104□ctg1904□WAG-80E7  
ctg491□ctg1104□ctg1904□WAG-101O15  
ctg491□ctg1104□ctg1904□WAG-122M4  
ctg491□ctg1104□ctg3247□WAG-27N1  
ctg491□ctg1104□ctg3247□WAG-60C9  
ctg491□ctg1104□ctg3247□WAG-63N1  
ctg491□ctg1104□ctg3247□WAG-114B11  
ctg4910□□□WAG-31G6  
ctg4910□ctg933□□WAG-12B17  
ctg4910□ctg933□□WAG-31H18  
ctg4910□ctg933□□WAG-59F12  
ctg4910□ctg933□□WAG-71B22  
ctg4910□ctg933□□WAG-84P11  
ctg4910□ctg933□□WAG-88P22  
ctg4910□ctg933□□WAG-96D2  
ctg4910□ctg933□□WAG-97H24  
ctg4910□ctg933□□WAG-115N24  
ctg4910□ctg933□ctg1779□WAG-26G19  
ctg4910□ctg933□ctg1779□WAG-44K24  
ctg4910□ctg933□ctg1779□WAG-87O11  
ctg4910□ctg933□ctg2703□WAG-58A3  
ctg4910□ctg933□ctg2703□WAG-102J20  
ctg4910□ctg933□ctg2703□WAG-113G8  
ctg4910□ctg933□ctg3130□WAG-15K8  
ctg4910□ctg933□ctg3130□WAG-31L6  
ctg4910□ctg933□ctg3130□WAG-37P13  
ctg4910□ctg933□ctg916□WAG-3A23  
ctg4910□ctg933□ctg916□WAG-3F22  
ctg4910□ctg933□ctg916□WAG-41G10  
ctg4910□ctg933□ctg916□WAG-75J6  
ctg4910□ctg933□ctg916□WAG-109K20  
ctg4910□ctg933□ctg916□WAG-123N23  
ctg4910□ctg933□ctg916□WAG-128I21  
ctg4911□□□WAG-22J7  
ctg4911□□□WAG-32E18  
ctg4911□□□WAG-68J7  
ctg4911□□□WAG-115I24  
ctg4911□ctg1205□ctg1396□WAG-73M24  
ctg4911□ctg1205□ctg1396□WAG-118L20  
ctg4911□ctg1205□ctg1396□WAG-118O20  
ctg4911□ctg1205□ctg1396□WAG-124E21  
ctg4911□ctg1205□ctg1396□WAG-129G7  
ctg4911□ctg1438□ctg1620□WAG-9M5

ctg4911□ctg1438□ctg1620□WAG-10L20  
ctg4911□ctg1438□ctg1620□WAG-95F18  
ctg4911□ctg1438□ctg1620□WAG-101M8  
ctg4911□ctg1438□ctg1620□WAG-113F5  
ctg4911□ctg1438□ctg1620□WAG-117A6  
ctg4911□ctg1610□□WAG-77C10  
ctg4911□ctg1610□□WAG-111O22  
ctg4911□ctg1610□ctg1459□WAG-74A17  
ctg4911□ctg1610□ctg1459□WAG-88I10  
ctg4911□ctg1610□ctg1459□WAG-88L16  
ctg4911□ctg1610□ctg1459□WAG-111P16  
ctg4911□ctg684□□WAG-3E7  
ctg4911□ctg684□ctg552□WAG-13G6  
ctg4911□ctg684□ctg552□WAG-57E20  
ctg4911□ctg684□ctg552□WAG-60G12  
ctg4911□ctg684□ctg552□WAG-80D14  
ctg4911□ctg684□ctg552□WAG-96N15  
ctg4911□ctg684□ctg910□WAG-1H18  
ctg4911□ctg684□ctg910□WAG-35P2  
ctg4911□ctg684□ctg910□WAG-44E9  
ctg4911□ctg684□ctg910□WAG-52M3  
ctg4911□ctg684□ctg910□WAG-71H11  
ctg4911□ctg684□ctg910□WAG-83F18  
ctg4911□ctg684□ctg910□WAG-87E14  
ctg4911□ctg684□ctg910□WAG-90K15  
ctg4911□ctg684□ctg910□WAG-95O15  
ctg4911□ctg684□ctg910□WAG-96H21  
ctg4911□ctg684□ctg910□WAG-100M14  
ctg4911□ctg684□ctg910□WAG-108C2  
ctg4912□ctg1455□ctg1485□WAG-11K23  
ctg4912□ctg1455□ctg1485□WAG-14H8  
ctg4912□ctg1455□ctg1485□WAG-76G4  
ctg4912□ctg1455□ctg1485□WAG-99C22  
ctg4912□ctg1455□ctg1485□WAG-99H21  
ctg4912□ctg1455□ctg1485□WAG-130G24  
ctg4913□□□WAG-32P2  
ctg4913□□□WAG-77G11  
ctg4913□□□WAG-86J1  
ctg4913□□□WAG-117G9  
ctg4913□ctg6506□□WAG-66M11  
ctg4913□ctg6506□□WAG-111H14  
ctg4913□ctg910□□WAG-2I9  
ctg4913□ctg910□ctg1339□WAG-20L3  
ctg4913□ctg910□ctg1339□WAG-67E17  
ctg4913□ctg910□ctg1339□WAG-89C6  
ctg4913□ctg910□ctg1339□WAG-92F12  
ctg4913□ctg910□ctg1339□WAG-95E22  
ctg4913□ctg910□ctg1339□WAG-107N15  
ctg4913□ctg910□ctg1339□WAG-122K3  
ctg4913□ctg910□ctg6017□WAG-65C18  
ctg4913□ctg910□ctg6017□WAG-79F21  
ctg4914□□□WAG-29H8  
ctg4914□□□WAG-49L17  
ctg4914□□□WAG-58E9  
ctg4914□ctg561□□WAG-6F1  
ctg4914□ctg561□□WAG-17A20

ctg4914□ctg561□□WAG-56J6  
ctg4914□ctg561□ctg996□WAG-31K14  
ctg4914□ctg561□ctg996□WAG-32C10  
ctg4914□ctg561□ctg996□WAG-36N15  
ctg4914□ctg561□ctg996□WAG-41D7  
ctg4914□ctg561□ctg996□WAG-41G4  
ctg4914□ctg561□ctg996□WAG-44G5  
ctg4914□ctg561□ctg996□WAG-44I9  
ctg4914□ctg561□ctg996□WAG-70M2  
ctg4914□ctg561□ctg996□WAG-71E17  
ctg4914□ctg561□ctg996□WAG-78K15  
ctg4914□ctg561□ctg996□WAG-92G2  
ctg4914□ctg561□ctg996□WAG-96G17  
ctg4914□ctg561□ctg996□WAG-100J4  
ctg4914□ctg561□ctg996□WAG-100K9  
ctg4914□ctg561□ctg996□WAG-123D19  
ctg4914□ctg561□ctg996□WAG-127O13  
ctg4915□ctg2825□□WAG-104D17  
ctg4915□ctg2825□ctg2817□WAG-65D9  
ctg4915□ctg2825□ctg2817□WAG-71O16  
ctg4915□ctg2825□ctg2817□WAG-89D3  
ctg4916□□□WAG-11N3  
ctg4916□□□WAG-34F19  
ctg4916□ctg271□□WAG-117G23  
ctg4916□ctg271□ctg1286□WAG-45B15  
ctg4916□ctg271□ctg1286□WAG-64N18  
ctg4916□ctg271□ctg1286□WAG-66H6  
ctg4916□ctg271□ctg1286□WAG-68H3  
ctg4916□ctg271□ctg1286□WAG-114G1  
ctg4916□ctg271□ctg1286□WAG-117C20  
ctg4916□ctg271□ctg336□WAG-9N22  
ctg4916□ctg271□ctg336□WAG-42D19  
ctg4916□ctg271□ctg336□WAG-42D23  
ctg4916□ctg271□ctg336□WAG-56P8  
ctg4916□ctg271□ctg336□WAG-57G8  
ctg4916□ctg271□ctg336□WAG-83G22  
ctg4916□ctg271□ctg336□WAG-86A16  
ctg4916□ctg271□ctg336□WAG-99J13  
ctg4916□ctg271□ctg336□WAG-106D5  
ctg4916□ctg271□ctg336□WAG-121C22  
ctg4917□ctg3139□□WAG-46L7  
ctg4917□ctg3139□□WAG-68B3  
ctg4917□ctg3139□□WAG-80L13  
ctg4917□ctg3139□ctg5411□WAG-49C3  
ctg4917□ctg3139□ctg5411□WAG-67D23  
ctg4918□ctg1491□□WAG-21E17  
ctg4918□ctg1491□□WAG-99A15  
ctg4918□ctg1491□□WAG-128J23  
ctg4918□ctg1491□ctg2202□WAG-21I16  
ctg4918□ctg1491□ctg2202□WAG-91J17  
ctg4918□ctg1491□ctg2202□WAG-110M12  
ctg4918□ctg1491□ctg2202□WAG-118O8  
ctg4918□ctg1491□ctg2691□WAG-12D12  
ctg4918□ctg1491□ctg2691□WAG-91C20  
ctg4918□ctg1491□ctg2691□WAG-112H6  
ctg4918□ctg1491□ctg2691□WAG-116A21

ctg4919□ctg11□□WAG-107G22  
ctg4919□ctg11□ctg7□WAG-11H3  
ctg4919□ctg11□ctg7□WAG-40D13  
ctg4919□ctg11□ctg7□WAG-52M16  
ctg4919□ctg11□ctg7□WAG-56H14  
ctg4919□ctg11□ctg7□WAG-57C17  
ctg4919□ctg11□ctg7□WAG-58A20  
ctg4919□ctg11□ctg7□WAG-60E19  
ctg4919□ctg11□ctg7□WAG-63E7  
ctg4919□ctg11□ctg7□WAG-71G14  
ctg4919□ctg11□ctg7□WAG-96P20  
ctg4919□ctg11□ctg7□WAG-97I17  
ctg4919□ctg11□ctg7□WAG-97K20  
ctg4919□ctg11□ctg7□WAG-113M17  
ctg4919□ctg11□ctg7□WAG-122H11  
ctg4919□ctg11□ctg7□WAG-127N6  
ctg4919□ctg11□ctg7□WAG-129N8  
ctg4919□ctg387□□WAG-1F11  
ctg4919□ctg387□ctg378□WAG-17M9  
ctg4919□ctg387□ctg378□WAG-22L13  
ctg4919□ctg387□ctg378□WAG-59B17  
ctg4919□ctg387□ctg378□WAG-60P9  
ctg4919□ctg387□ctg378□WAG-68P24  
ctg4919□ctg387□ctg378□WAG-70O9  
ctg4919□ctg387□ctg378□WAG-79O8  
ctg4919□ctg387□ctg378□WAG-115N22  
ctg492□□□WAG-36H3  
ctg492□□□WAG-92D18  
ctg492□□□WAG-99K11  
ctg492□□□WAG-116B19  
ctg492□ctg1305□ctg1308□WAG-3L17  
ctg492□ctg1305□ctg1308□WAG-42P21  
ctg492□ctg1305□ctg1308□WAG-48L13  
ctg492□ctg1305□ctg1308□WAG-67D2  
ctg492□ctg1305□ctg1308□WAG-123A22  
ctg492□ctg3095□ctg3091□WAG-11C22  
ctg492□ctg3095□ctg3091□WAG-61I1  
ctg492□ctg3095□ctg3091□WAG-61I18  
ctg4920□ctg181□□WAG-4M16  
ctg4920□ctg181□ctg151□WAG-1L10  
ctg4920□ctg181□ctg151□WAG-17H7  
ctg4920□ctg181□ctg151□WAG-22N12  
ctg4920□ctg181□ctg151□WAG-28D13  
ctg4920□ctg181□ctg151□WAG-67N21  
ctg4920□ctg181□ctg151□WAG-67P20  
ctg4920□ctg181□ctg151□WAG-70J16  
ctg4920□ctg181□ctg151□WAG-74L17  
ctg4920□ctg181□ctg151□WAG-74P12  
ctg4920□ctg181□ctg151□WAG-75N4  
ctg4920□ctg181□ctg151□WAG-83F15  
ctg4920□ctg181□ctg151□WAG-90B1  
ctg4920□ctg181□ctg151□WAG-95A7  
ctg4920□ctg181□ctg151□WAG-101E2  
ctg4920□ctg181□ctg151□WAG-104E17  
ctg4920□ctg181□ctg151□WAG-105D15  
ctg4920□ctg181□ctg151□WAG-105E4

ctg4920□ctg181□ctg151□WAG-109A18  
ctg4920□ctg181□ctg151□WAG-110F12  
ctg4920□ctg181□ctg151□WAG-118I19  
ctg4920□ctg181□ctg151□WAG-120B24  
ctg4920□ctg181□ctg151□WAG-123M20  
ctg4920□ctg4185□□WAG-81E8  
ctg4920□ctg4185□□WAG-107L1  
ctg4920□ctg4185□ctg6578□WAG-13D2  
ctg4920□ctg4185□ctg6578□WAG-36G17  
ctg4921□□□WAG-88E8  
ctg4921□ctg1628□□WAG-53F20  
ctg4921□ctg1628□ctg2449□WAG-28J15  
ctg4921□ctg1628□ctg2449□WAG-73D9  
ctg4921□ctg1628□ctg2449□WAG-85L19  
ctg4921□ctg1628□ctg2449□WAG-89I9  
ctg4921□ctg1628□ctg2449□WAG-104N6  
ctg4921□ctg2883□ctg2874□WAG-59H13  
ctg4921□ctg2883□ctg2874□WAG-86P1  
ctg4921□ctg2883□ctg2874□WAG-114A1  
ctg4921□ctg3543□ctg3689□WAG-38H14  
ctg4921□ctg3543□ctg3689□WAG-58M14  
ctg4921□ctg3543□ctg3689□WAG-105M19  
ctg4922□□□WAG-63C13  
ctg4922□□□WAG-66M4  
ctg4922□ctg30□□WAG-11K2  
ctg4922□ctg30□□WAG-35D21  
ctg4922□ctg30□ctg169□WAG-11N19  
ctg4922□ctg30□ctg169□WAG-18C15  
ctg4922□ctg30□ctg169□WAG-25I11  
ctg4922□ctg30□ctg169□WAG-29A10  
ctg4922□ctg30□ctg169□WAG-48E3  
ctg4922□ctg30□ctg169□WAG-49B24  
ctg4922□ctg30□ctg169□WAG-89A19  
ctg4922□ctg30□ctg169□WAG-89L4  
ctg4922□ctg30□ctg169□WAG-95J3  
ctg4922□ctg30□ctg169□WAG-100G1  
ctg4922□ctg30□ctg28□WAG-4J12  
ctg4922□ctg30□ctg28□WAG-10E19  
ctg4922□ctg30□ctg28□WAG-27J20  
ctg4922□ctg30□ctg28□WAG-33K6  
ctg4922□ctg30□ctg28□WAG-55A3  
ctg4922□ctg30□ctg28□WAG-70K6  
ctg4922□ctg30□ctg28□WAG-93C23  
ctg4922□ctg30□ctg28□WAG-93F19  
ctg4922□ctg30□ctg28□WAG-97I19  
ctg4922□ctg30□ctg28□WAG-98B21  
ctg4922□ctg30□ctg28□WAG-104P17  
ctg4922□ctg30□ctg28□WAG-110G16  
ctg4922□ctg30□ctg28□WAG-121H21  
ctg4922□ctg30□ctg28□WAG-130O6  
ctg4922□ctg30□ctg96□WAG-32G6  
ctg4922□ctg30□ctg96□WAG-36C11  
ctg4922□ctg30□ctg96□WAG-37A4  
ctg4922□ctg30□ctg96□WAG-60D6  
ctg4922□ctg30□ctg96□WAG-69O2  
ctg4922□ctg30□ctg96□WAG-71P18

ctg4922□ctg30□ctg96□WAG-79M8  
ctg4922□ctg30□ctg96□WAG-85O11  
ctg4922□ctg30□ctg96□WAG-90E8  
ctg4922□ctg30□ctg96□WAG-107F17  
ctg4922□ctg30□ctg96□WAG-118A20  
ctg4923□□□WAG-36N16  
ctg4923□□□WAG-38P24  
ctg4923□ctg390□ctg297□WAG-14L18  
ctg4923□ctg390□ctg297□WAG-29E14  
ctg4923□ctg390□ctg297□WAG-42A13  
ctg4923□ctg390□ctg297□WAG-42G19  
ctg4923□ctg390□ctg297□WAG-76E6  
ctg4923□ctg390□ctg297□WAG-100H7  
ctg4923□ctg390□ctg297□WAG-103K16  
ctg4923□ctg390□ctg297□WAG-118K22  
ctg4923□ctg390□ctg297□WAG-121G13  
ctg4923□ctg390□ctg297□WAG-128E4  
ctg4923□ctg3993□□WAG-48H20  
ctg4923□ctg3993□ctg5249□WAG-50I11  
ctg4923□ctg3993□ctg5249□WAG-68A6  
ctg4923□ctg5254□ctg6054□WAG-78E19  
ctg4923□ctg5254□ctg6054□WAG-96O24  
ctg4924□□□WAG-60C18  
ctg4924□ctg1649□ctg1506□WAG-43B20  
ctg4924□ctg1649□ctg1506□WAG-85E8  
ctg4924□ctg1649□ctg1506□WAG-118D10  
ctg4924□ctg2293□□WAG-74C11  
ctg4924□ctg2293□ctg2964□WAG-41H21  
ctg4924□ctg2293□ctg2964□WAG-45J4  
ctg4924□ctg2293□ctg5190□WAG-14G8  
ctg4924□ctg2293□ctg5190□WAG-71M9  
ctg4924□ctg718□□WAG-74P13  
ctg4924□ctg718□□WAG-107J24  
ctg4924□ctg718□ctg575□WAG-9I14  
ctg4924□ctg718□ctg575□WAG-10C7  
ctg4924□ctg718□ctg575□WAG-42F2  
ctg4924□ctg718□ctg575□WAG-63M9  
ctg4924□ctg718□ctg575□WAG-83L22  
ctg4924□ctg718□ctg575□WAG-99L2  
ctg4924□ctg718□ctg575□WAG-106A7  
ctg4925□□□WAG-76D13  
ctg4925□□□WAG-97L14  
ctg4925□ctg3380□ctg3456□WAG-119K11  
ctg4925□ctg3380□ctg3456□WAG-121K15  
ctg4925□ctg3380□ctg3456□WAG-128P1  
ctg4925□ctg4924□ctg5272□WAG-8C17  
ctg4925□ctg4924□ctg5272□WAG-119C16  
ctg4926□ctg1688□ctg1538□WAG-6B13  
ctg4926□ctg1688□ctg1538□WAG-49H7  
ctg4926□ctg1688□ctg1538□WAG-53P5  
ctg4926□ctg1688□ctg1538□WAG-56E7  
ctg4927□ctg385□□WAG-64C5  
ctg4927□ctg385□ctg2041□WAG-44H16  
ctg4927□ctg385□ctg2041□WAG-66I14  
ctg4927□ctg385□ctg2041□WAG-130C5  
ctg4927□ctg385□ctg510□WAG-12N14

ctg4927□ctg385□ctg510□WAG-33H13  
ctg4927□ctg385□ctg510□WAG-38K18  
ctg4927□ctg385□ctg510□WAG-55O11  
ctg4927□ctg385□ctg510□WAG-71I8  
ctg4927□ctg385□ctg510□WAG-76A17  
ctg4927□ctg385□ctg510□WAG-84G8  
ctg4927□ctg385□ctg510□WAG-88M7  
ctg4927□ctg385□ctg510□WAG-116M13  
ctg4928□□□WAG-36J22  
ctg4928□ctg503□□WAG-5J19  
ctg4928□ctg503□ctg2622□WAG-49O3  
ctg4928□ctg503□ctg2622□WAG-60E13  
ctg4928□ctg503□ctg2622□WAG-108N2  
ctg4928□ctg503□ctg2622□WAG-109J23  
ctg4928□ctg503□ctg2622□WAG-114I13  
ctg4928□ctg503□ctg3049□WAG-44G17  
ctg4928□ctg503□ctg3049□WAG-69K2  
ctg4928□ctg503□ctg3049□WAG-73L2  
ctg4928□ctg503□ctg5011□WAG-60O1  
ctg4928□ctg503□ctg5011□WAG-68I9  
ctg4928□ctg503□ctg5638□WAG-14D10  
ctg4928□ctg503□ctg5638□WAG-92A5  
ctg4928□ctg503□ctg704□WAG-1G11  
ctg4928□ctg503□ctg704□WAG-17O8  
ctg4928□ctg503□ctg704□WAG-37K19  
ctg4928□ctg503□ctg704□WAG-53N7  
ctg4928□ctg503□ctg704□WAG-71P22  
ctg4928□ctg503□ctg704□WAG-90K8  
ctg4928□ctg503□ctg704□WAG-108G15  
ctg4929□□□WAG-46G6  
ctg4929□ctg2449□□WAG-33I7  
ctg4929□ctg2449□□WAG-44F4  
ctg4929□ctg2449□□WAG-70J21  
ctg4929□ctg2449□ctg6058□WAG-30I19  
ctg4929□ctg2449□ctg6058□WAG-53K15  
ctg4929□ctg2449□ctg6271□WAG-39J9  
ctg4929□ctg2449□ctg6271□WAG-73F9  
ctg493□ctg1105□ctg942□WAG-54A16  
ctg493□ctg1105□ctg942□WAG-71I2  
ctg493□ctg1105□ctg942□WAG-91N16  
ctg493□ctg1105□ctg942□WAG-92A6  
ctg493□ctg1105□ctg942□WAG-99L14  
ctg493□ctg1105□ctg942□WAG-102L22  
ctg493□ctg1105□ctg942□WAG-112K18  
ctg4930□□□WAG-117F10  
ctg4930□ctg525□□WAG-3F18  
ctg4930□ctg525□□WAG-18K13  
ctg4930□ctg525□ctg899□WAG-3K16  
ctg4930□ctg525□ctg899□WAG-10I3  
ctg4930□ctg525□ctg899□WAG-51P13  
ctg4930□ctg525□ctg899□WAG-56K23  
ctg4930□ctg525□ctg899□WAG-86E18  
ctg4930□ctg525□ctg899□WAG-87C19  
ctg4930□ctg525□ctg899□WAG-87I11  
ctg4930□ctg525□ctg899□WAG-94F11  
ctg4930□ctg525□ctg899□WAG-100P11

ctg4930□ctg525□ctg899□WAG-105D12  
ctg4930□ctg525□ctg899□WAG-127L4  
ctg4931□□□WAG-107J15  
ctg4931□ctg3590□ctg3764□WAG-46P15  
ctg4931□ctg3590□ctg3764□WAG-82E11  
ctg4931□ctg3590□ctg3764□WAG-127A4  
ctg4932□□□WAG-4M19  
ctg4932□□□WAG-6O13  
ctg4932□□□WAG-51N23  
ctg4932□□□WAG-52N14  
ctg4932□□□WAG-86I24  
ctg4932□□□WAG-101B18  
ctg4932□□□WAG-102J10  
ctg4932□ctg2927□ctg2901□WAG-76M8  
ctg4932□ctg2927□ctg2901□WAG-78H11  
ctg4932□ctg2927□ctg2901□WAG-99G15  
ctg4932□ctg298□□WAG-71I6  
ctg4932□ctg298□□WAG-97D1  
ctg4932□ctg298□ctg228□WAG-11D3  
ctg4932□ctg298□ctg228□WAG-30B16  
ctg4932□ctg298□ctg228□WAG-82C9  
ctg4932□ctg298□ctg228□WAG-82N7  
ctg4932□ctg298□ctg228□WAG-84B3  
ctg4932□ctg298□ctg228□WAG-85K2  
ctg4932□ctg298□ctg228□WAG-90H23  
ctg4932□ctg298□ctg228□WAG-107A22  
ctg4932□ctg298□ctg228□WAG-119I16  
ctg4932□ctg298□ctg228□WAG-127C7  
ctg4932□ctg5024□ctg5517□WAG-28J19  
ctg4932□ctg5024□ctg5517□WAG-38L11  
ctg4933□□□WAG-43J20  
ctg4933□□□WAG-59C8  
ctg4933□ctg1863□ctg2292□WAG-87H12  
ctg4933□ctg1863□ctg2292□WAG-89N2  
ctg4933□ctg1863□ctg2292□WAG-106L12  
ctg4933□ctg1863□ctg2292□WAG-108I17  
ctg4933□ctg1863□ctg2292□WAG-114B8  
ctg4934□□□WAG-36E18  
ctg4934□□□WAG-89B3  
ctg4934□ctg104□□WAG-65P8  
ctg4934□ctg104□□WAG-111M21  
ctg4934□ctg104□ctg92□WAG-3I4  
ctg4934□ctg104□ctg92□WAG-8C16  
ctg4934□ctg104□ctg92□WAG-18O12  
ctg4934□ctg104□ctg92□WAG-20N5  
ctg4934□ctg104□ctg92□WAG-24I11  
ctg4934□ctg104□ctg92□WAG-45H19  
ctg4934□ctg104□ctg92□WAG-55I14  
ctg4934□ctg104□ctg92□WAG-64A15  
ctg4934□ctg104□ctg92□WAG-88J5  
ctg4934□ctg104□ctg92□WAG-111L21  
ctg4934□ctg104□ctg92□WAG-114P12  
ctg4934□ctg1369□ctg1539□WAG-16G15  
ctg4934□ctg1369□ctg1539□WAG-19J13  
ctg4934□ctg1369□ctg1539□WAG-21P5  
ctg4934□ctg1369□ctg1539□WAG-27J17



ctg4934□ctg1369□ctg1539□WAG-37A14  
ctg4934□ctg1369□ctg1539□WAG-71J3  
ctg4934□ctg1369□ctg1539□WAG-126B21  
ctg4934□ctg1369□ctg1539□WAG-127K11  
ctg4934□ctg1390□□WAG-130L24  
ctg4934□ctg1390□ctg1617□WAG-8E21  
ctg4934□ctg1390□ctg1617□WAG-36D3  
ctg4934□ctg1390□ctg1617□WAG-42M1  
ctg4934□ctg1390□ctg1617□WAG-88O10  
ctg4934□ctg254□□WAG-8K24  
ctg4934□ctg254□□WAG-32D19  
ctg4934□ctg254□ctg258□WAG-3K24  
ctg4934□ctg254□ctg258□WAG-3N19  
ctg4934□ctg254□ctg258□WAG-9D16  
ctg4934□ctg254□ctg258□WAG-10E3  
ctg4934□ctg254□ctg258□WAG-11J3  
ctg4934□ctg254□ctg258□WAG-16F6  
ctg4934□ctg254□ctg258□WAG-17I16  
ctg4934□ctg254□ctg258□WAG-37H14  
ctg4934□ctg254□ctg258□WAG-47P19  
ctg4934□ctg254□ctg258□WAG-65H23  
ctg4934□ctg254□ctg258□WAG-69P14  
ctg4934□ctg254□ctg258□WAG-71F17  
ctg4934□ctg254□ctg258□WAG-76C4  
ctg4934□ctg254□ctg258□WAG-82I10  
ctg4934□ctg254□ctg258□WAG-88B14  
ctg4934□ctg254□ctg258□WAG-94O6  
ctg4934□ctg254□ctg258□WAG-98N22  
ctg4934□ctg254□ctg258□WAG-102C5  
ctg4934□ctg254□ctg258□WAG-122G9  
ctg4934□ctg254□ctg258□WAG-125L19  
ctg4934□ctg254□ctg258□WAG-127L19  
ctg4934□ctg4291□□WAG-60P15  
ctg4934□ctg4291□□WAG-71I16  
ctg4934□ctg4291□ctg6245□WAG-116J15  
ctg4934□ctg4291□ctg6245□WAG-128H8  
ctg4935□□□WAG-13B5  
ctg4935□□□WAG-91G15  
ctg4935□□□WAG-104G13  
ctg4935□□□WAG-104J10  
ctg4935□ctg1049□□WAG-49B6  
ctg4935□ctg1049□ctg884□WAG-2E8  
ctg4935□ctg1049□ctg884□WAG-48I17  
ctg4935□ctg1049□ctg884□WAG-63H6  
ctg4935□ctg1049□ctg884□WAG-66B15  
ctg4935□ctg1049□ctg884□WAG-80M18  
ctg4935□ctg1049□ctg884□WAG-86G7  
ctg4935□ctg1049□ctg884□WAG-127D6  
ctg4935□ctg212□□WAG-102G11  
ctg4935□ctg212□ctg1013□WAG-4E6  
ctg4935□ctg212□ctg1013□WAG-32O22  
ctg4935□ctg212□ctg1013□WAG-61N9  
ctg4935□ctg212□ctg1013□WAG-61N12  
ctg4935□ctg212□ctg1013□WAG-76I10  
ctg4935□ctg212□ctg1013□WAG-93G19  
ctg4935□ctg212□ctg1013□WAG-99N20

ctg4935□ctg212□ctg1013□WAG-129L5  
ctg4935□ctg212□ctg175□WAG-30I1  
ctg4935□ctg212□ctg175□WAG-31D23  
ctg4935□ctg212□ctg175□WAG-36D2  
ctg4935□ctg212□ctg175□WAG-37D12  
ctg4935□ctg212□ctg175□WAG-55E7  
ctg4935□ctg212□ctg175□WAG-56I12  
ctg4935□ctg212□ctg175□WAG-72N5  
ctg4935□ctg212□ctg175□WAG-83D14  
ctg4935□ctg212□ctg175□WAG-99K8  
ctg4935□ctg212□ctg175□WAG-112L16  
ctg4935□ctg212□ctg175□WAG-121E6  
ctg4935□ctg212□ctg1890□WAG-17H9  
ctg4935□ctg212□ctg1890□WAG-86H10  
ctg4935□ctg212□ctg1890□WAG-127G14  
ctg4936□ctg185□ctg153□WAG-1K12  
ctg4936□ctg185□ctg153□WAG-50L20  
ctg4936□ctg185□ctg153□WAG-63H11  
ctg4936□ctg185□ctg153□WAG-63P13  
ctg4936□ctg185□ctg153□WAG-64K13  
ctg4936□ctg185□ctg153□WAG-65E14  
ctg4936□ctg185□ctg153□WAG-73O24  
ctg4936□ctg185□ctg153□WAG-74J8  
ctg4936□ctg185□ctg153□WAG-80I19  
ctg4936□ctg185□ctg153□WAG-93L24  
ctg4936□ctg185□ctg153□WAG-102I14  
ctg4936□ctg185□ctg153□WAG-120H15  
ctg4936□ctg185□ctg153□WAG-122N8  
ctg4936□ctg185□ctg153□WAG-127G23  
ctg4937□□□WAG-91F17  
ctg4937□ctg240□□WAG-45H2  
ctg4937□ctg240□ctg243□WAG-7K6  
ctg4937□ctg240□ctg243□WAG-17B3  
ctg4937□ctg240□ctg243□WAG-25G11  
ctg4937□ctg240□ctg243□WAG-74C23  
ctg4937□ctg240□ctg243□WAG-76G2  
ctg4937□ctg240□ctg243□WAG-85M21  
ctg4937□ctg240□ctg243□WAG-108E14  
ctg4937□ctg240□ctg243□WAG-111M5  
ctg4937□ctg240□ctg243□WAG-123F21  
ctg4937□ctg2513□□WAG-130N14  
ctg4937□ctg2513□ctg2670□WAG-42H4  
ctg4937□ctg2513□ctg2670□WAG-42H20  
ctg4937□ctg2513□ctg2670□WAG-45E20  
ctg4937□ctg2513□ctg2670□WAG-57C22  
ctg4938□□□WAG-23O9  
ctg4938□ctg1767□ctg2072□WAG-14F12  
ctg4938□ctg1767□ctg2072□WAG-30A21  
ctg4938□ctg1767□ctg2072□WAG-115M6  
ctg4938□ctg1767□ctg2072□WAG-128G14  
ctg4939□□□WAG-19I12  
ctg4939□□□WAG-27O11  
ctg4939□ctg290□□WAG-74M4  
ctg4939□ctg290□ctg222□WAG-12L12  
ctg4939□ctg290□ctg222□WAG-17D20  
ctg4939□ctg290□ctg222□WAG-17N18

ctg4939□ctg290□ctg222□WAG-22B5  
ctg4939□ctg290□ctg222□WAG-28P13  
ctg4939□ctg290□ctg222□WAG-53M13  
ctg4939□ctg290□ctg222□WAG-69A7  
ctg4939□ctg290□ctg222□WAG-76D17  
ctg4939□ctg290□ctg222□WAG-105H2  
ctg4939□ctg290□ctg222□WAG-107D22  
ctg4939□ctg290□ctg222□WAG-107M4  
ctg4939□ctg290□ctg3544□WAG-67G7  
ctg4939□ctg290□ctg3544□WAG-77D9  
ctg4939□ctg290□ctg3544□WAG-85E23  
ctg4939□ctg290□ctg4554□WAG-71F13  
ctg4939□ctg290□ctg4554□WAG-90A1  
ctg4939□ctg821□ctg1397□WAG-12B14  
ctg4939□ctg821□ctg1397□WAG-17K8  
ctg4939□ctg821□ctg1397□WAG-59B4  
ctg4939□ctg821□ctg1397□WAG-100C18  
ctg4939□ctg821□ctg1397□WAG-109K22  
ctg4939□ctg821□ctg671□WAG-17J18  
ctg4939□ctg821□ctg671□WAG-45B17  
ctg4939□ctg821□ctg671□WAG-86C13  
ctg4939□ctg821□ctg671□WAG-88F16  
ctg4939□ctg821□ctg671□WAG-101P9  
ctg4939□ctg821□ctg671□WAG-105B18  
ctg494□ctg1472□ctg1323□WAG-30C21  
ctg494□ctg1472□ctg1323□WAG-69J24  
ctg494□ctg1472□ctg1323□WAG-115G15  
ctg494□ctg1472□ctg1323□WAG-119J9  
ctg494□ctg1472□ctg1323□WAG-125I8  
ctg494□ctg2756□□WAG-71N17  
ctg494□ctg2756□□WAG-102C21  
ctg494□ctg2756□□WAG-118F21  
ctg494□ctg2756□ctg4187□WAG-12D3  
ctg494□ctg2756□ctg4187□WAG-41K12  
ctg494□ctg2756□ctg4187□WAG-95L9  
ctg4940□ctg3751□ctg3983□WAG-96F1  
ctg4940□ctg3751□ctg3983□WAG-109G14  
ctg4941□□□WAG-29H4  
ctg4941□□□WAG-36K6  
ctg4941□□□WAG-122H8  
ctg4941□ctg2298□□WAG-107K8  
ctg4941□ctg2298□ctg2967□WAG-19D1  
ctg4941□ctg2298□ctg2967□WAG-37J20  
ctg4941□ctg2298□ctg2967□WAG-98K16  
ctg4941□ctg586□□WAG-29O3  
ctg4941□ctg586□□WAG-36F20  
ctg4941□ctg586□□WAG-60M21  
ctg4941□ctg586□□WAG-126C14  
ctg4941□ctg586□ctg1633□WAG-8O5  
ctg4941□ctg586□ctg1633□WAG-42H6  
ctg4941□ctg586□ctg1633□WAG-128O16  
ctg4941□ctg586□ctg1633□WAG-129I16  
ctg4941□ctg586□ctg849□WAG-11D17  
ctg4941□ctg586□ctg849□WAG-18F8  
ctg4941□ctg586□ctg849□WAG-31F16  
ctg4941□ctg586□ctg849□WAG-39L5

ctg4941□ctg586□ctg849□WAG-54G24  
ctg4941□ctg586□ctg849□WAG-55A11  
ctg4941□ctg586□ctg849□WAG-67K21  
ctg4941□ctg586□ctg849□WAG-79P16  
ctg4941□ctg586□ctg849□WAG-99B3  
ctg4941□ctg586□ctg849□WAG-108F8  
ctg4941□ctg586□ctg849□WAG-109C10  
ctg4941□ctg586□ctg849□WAG-116C19  
ctg4941□ctg586□ctg849□WAG-130O3  
ctg4942□□□WAG-12B11  
ctg4942□□□WAG-45A17  
ctg4942□ctg6494□□WAG-3B18  
ctg4942□ctg6494□□WAG-35L1  
ctg4943□□□WAG-14I19  
ctg4943□□□WAG-33B19  
ctg4943□□□WAG-75N24  
ctg4943□ctg1046□ctg880□WAG-24B3  
ctg4943□ctg1046□ctg880□WAG-68K22  
ctg4943□ctg1046□ctg880□WAG-94H16  
ctg4943□ctg1046□ctg880□WAG-102F15  
ctg4943□ctg1046□ctg880□WAG-118B7  
ctg4943□ctg34□□WAG-39P13  
ctg4943□ctg34□□WAG-91N4  
ctg4943□ctg34□ctg36□WAG-28O17  
ctg4943□ctg34□ctg36□WAG-43J15  
ctg4943□ctg34□ctg36□WAG-46H18  
ctg4943□ctg34□ctg36□WAG-59B15  
ctg4943□ctg34□ctg36□WAG-60I21  
ctg4943□ctg34□ctg36□WAG-73P3  
ctg4943□ctg34□ctg36□WAG-80M21  
ctg4943□ctg34□ctg36□WAG-82M1  
ctg4943□ctg34□ctg36□WAG-86N22  
ctg4943□ctg34□ctg36□WAG-89N15  
ctg4943□ctg34□ctg36□WAG-92B7  
ctg4943□ctg34□ctg36□WAG-103N11  
ctg4943□ctg34□ctg36□WAG-117D12  
ctg4943□ctg34□ctg36□WAG-119C1  
ctg4943□ctg34□ctg36□WAG-130E7  
ctg4943□ctg84□□WAG-50N14  
ctg4943□ctg84□□WAG-106A4  
ctg4943□ctg84□ctg2064□WAG-69H23  
ctg4943□ctg84□ctg2064□WAG-98N7  
ctg4943□ctg84□ctg2064□WAG-113D17  
ctg4943□ctg84□ctg2064□WAG-115A14  
ctg4943□ctg84□ctg2064□WAG-124A1  
ctg4943□ctg84□ctg4299□WAG-34E14  
ctg4943□ctg84□ctg4299□WAG-127E15  
ctg4943□ctg84□ctg62□WAG-4O12  
ctg4943□ctg84□ctg62□WAG-10B14  
ctg4943□ctg84□ctg62□WAG-10F7  
ctg4943□ctg84□ctg62□WAG-16P22  
ctg4943□ctg84□ctg62□WAG-25P9  
ctg4943□ctg84□ctg62□WAG-38F23  
ctg4943□ctg84□ctg62□WAG-50J12  
ctg4943□ctg84□ctg62□WAG-72C18  
ctg4943□ctg84□ctg62□WAG-83L21

ctg4943□ctg84□ctg62□WAG-108F4  
ctg4943□ctg84□ctg62□WAG-118C14  
ctg4943□ctg84□ctg62□WAG-122C12  
ctg4943□ctg84□ctg62□WAG-123E24  
ctg4943□ctg84□ctg62□WAG-129B5  
ctg4944□□□WAG-34O18  
ctg4944□□□WAG-39N21  
ctg4944□ctg1450□□WAG-2L5  
ctg4944□ctg1450□□WAG-12E18  
ctg4944□ctg1450□ctg2854□WAG-47M7  
ctg4944□ctg1450□ctg2854□WAG-48E2  
ctg4944□ctg1450□ctg2854□WAG-91N9  
ctg4944□ctg1450□ctg2854□WAG-123C20  
ctg4944□ctg1450□ctg2859□WAG-61F1  
ctg4944□ctg1450□ctg2859□WAG-97M17  
ctg4944□ctg1450□ctg2859□WAG-118L5  
ctg4944□ctg1450□ctg4326□WAG-12P20  
ctg4944□ctg1450□ctg4326□WAG-49L18  
ctg4945□□□WAG-28F2  
ctg4945□□□WAG-64M7  
ctg4945□□□WAG-65A6  
ctg4945□ctg105□□WAG-111G22  
ctg4945□ctg105□ctg98□WAG-10G14  
ctg4945□ctg105□ctg98□WAG-25E5  
ctg4945□ctg105□ctg98□WAG-60N3  
ctg4945□ctg105□ctg98□WAG-62D20  
ctg4945□ctg105□ctg98□WAG-81D12  
ctg4945□ctg105□ctg98□WAG-85D12  
ctg4945□ctg105□ctg98□WAG-106M23  
ctg4945□ctg105□ctg98□WAG-112G17  
ctg4945□ctg105□ctg98□WAG-129C18  
ctg4945□ctg194□□WAG-14M8  
ctg4945□ctg194□ctg216□WAG-7K11  
ctg4945□ctg194□ctg216□WAG-25F17  
ctg4945□ctg194□ctg216□WAG-31A7  
ctg4945□ctg194□ctg216□WAG-39H2  
ctg4945□ctg194□ctg216□WAG-67N16  
ctg4945□ctg194□ctg216□WAG-68L4  
ctg4945□ctg194□ctg216□WAG-75C7  
ctg4945□ctg194□ctg216□WAG-76E13  
ctg4945□ctg194□ctg216□WAG-82N20  
ctg4945□ctg194□ctg216□WAG-82P19  
ctg4945□ctg194□ctg216□WAG-86O2  
ctg4945□ctg194□ctg216□WAG-90D17  
ctg4945□ctg194□ctg216□WAG-97E20  
ctg4945□ctg194□ctg216□WAG-104C10  
ctg4945□ctg194□ctg216□WAG-107F22  
ctg4945□ctg194□ctg216□WAG-114E6  
ctg4945□ctg194□ctg216□WAG-115P16  
ctg4945□ctg194□ctg216□WAG-116H15  
ctg4945□ctg194□ctg216□WAG-126E12  
ctg4945□ctg3914□□WAG-129O12  
ctg4945□ctg3914□ctg5275□WAG-106M16  
ctg4945□ctg3914□ctg5275□WAG-117F24  
ctg4945□ctg4145□□WAG-58E12  
ctg4945□ctg4145□ctg5876□WAG-35A16

ctg4945□ctg4145□ctg5876□WAG-106M18  
ctg4945□ctg6272□□WAG-1I18  
ctg4945□ctg6272□□WAG-7I15  
ctg4946□□□WAG-5K6  
ctg4946□□□WAG-61E2  
ctg4946□□□WAG-64D9  
ctg4946□□□WAG-74B5  
ctg4946□□□WAG-96I21  
ctg4946□ctg2877□□WAG-109L20  
ctg4946□ctg2877□ctg3850□WAG-13J13  
ctg4946□ctg2877□ctg3850□WAG-50M18  
ctg4946□ctg2877□ctg3850□WAG-61A18  
ctg4946□ctg2877□ctg3850□WAG-120A16  
ctg4946□ctg2877□ctg4836□WAG-88I7  
ctg4946□ctg2877□ctg4836□WAG-125C2  
ctg4946□ctg303□□WAG-107L16  
ctg4946□ctg303□ctg232□WAG-15N1  
ctg4946□ctg303□ctg232□WAG-36I9  
ctg4946□ctg303□ctg232□WAG-42J7  
ctg4946□ctg303□ctg232□WAG-44K6  
ctg4946□ctg303□ctg232□WAG-54P16  
ctg4946□ctg303□ctg232□WAG-57L14  
ctg4946□ctg303□ctg232□WAG-95J20  
ctg4946□ctg303□ctg3156□WAG-71P5  
ctg4946□ctg303□ctg3156□WAG-114K3  
ctg4946□ctg303□ctg3156□WAG-124K4  
ctg4946□ctg303□ctg6457□WAG-96P5  
ctg4946□ctg303□ctg6457□WAG-122H5  
ctg4946□ctg88□ctg105□WAG-8B12  
ctg4946□ctg88□ctg105□WAG-8D4  
ctg4946□ctg88□ctg105□WAG-9D2  
ctg4946□ctg88□ctg105□WAG-9O2  
ctg4946□ctg88□ctg105□WAG-11G20  
ctg4946□ctg88□ctg105□WAG-37P1  
ctg4946□ctg88□ctg105□WAG-44C6  
ctg4946□ctg88□ctg105□WAG-45J6  
ctg4946□ctg88□ctg105□WAG-72O11  
ctg4946□ctg88□ctg105□WAG-76J13  
ctg4946□ctg88□ctg105□WAG-92E12  
ctg4946□ctg88□ctg105□WAG-97J19  
ctg4946□ctg88□ctg105□WAG-104I13  
ctg4946□ctg88□ctg105□WAG-105C14  
ctg4946□ctg88□ctg105□WAG-120N1  
ctg4946□ctg88□ctg105□WAG-130B8  
ctg4947□ctg190□□WAG-52A4  
ctg4947□ctg190□□WAG-97G21  
ctg4947□ctg190□□WAG-122I13  
ctg4947□ctg190□ctg302□WAG-7K24  
ctg4947□ctg190□ctg302□WAG-37B15  
ctg4947□ctg190□ctg302□WAG-51L2  
ctg4947□ctg190□ctg302□WAG-61O24  
ctg4947□ctg190□ctg302□WAG-70C15  
ctg4947□ctg190□ctg302□WAG-111G11  
ctg4947□ctg190□ctg302□WAG-114J10  
ctg4947□ctg190□ctg302□WAG-120C15  
ctg4947□ctg190□ctg302□WAG-120I21

ctg4947□ctg190□ctg302□WAG-130N1  
ctg4947□ctg5360□ctg6298□WAG-115O2  
ctg4947□ctg5360□ctg6298□WAG-122J2  
ctg4947□ctg77□□WAG-6H8  
ctg4947□ctg77□□WAG-74J5  
ctg4947□ctg77□ctg67□WAG-12K14  
ctg4947□ctg77□ctg67□WAG-22D11  
ctg4947□ctg77□ctg67□WAG-32C9  
ctg4947□ctg77□ctg67□WAG-37P3  
ctg4947□ctg77□ctg67□WAG-51F20  
ctg4947□ctg77□ctg67□WAG-56E12  
ctg4947□ctg77□ctg67□WAG-66G5  
ctg4947□ctg77□ctg67□WAG-69L2  
ctg4947□ctg77□ctg67□WAG-74F5  
ctg4947□ctg77□ctg67□WAG-89M4  
ctg4947□ctg77□ctg67□WAG-108A22  
ctg4947□ctg77□ctg67□WAG-127A6  
ctg4948□□□WAG-16L4  
ctg4948□□□WAG-99O10  
ctg4948□□□WAG-105B13  
ctg4948□□□WAG-125K21  
ctg4948□ctg262□□WAG-23K7  
ctg4948□ctg262□□WAG-74L10  
ctg4948□ctg262□□WAG-94O10  
ctg4948□ctg262□ctg4963□WAG-91I19  
ctg4948□ctg262□ctg4963□WAG-123N3  
ctg4948□ctg262□ctg515□WAG-28G9  
ctg4948□ctg262□ctg515□WAG-62H7  
ctg4948□ctg262□ctg515□WAG-85C8  
ctg4948□ctg262□ctg515□WAG-93L2  
ctg4948□ctg262□ctg515□WAG-99L5  
ctg4948□ctg262□ctg515□WAG-115K19  
ctg4948□ctg262□ctg515□WAG-123J15  
ctg4948□ctg262□ctg515□WAG-127O14  
ctg4948□ctg262□ctg515□WAG-130H19  
ctg4948□ctg262□ctg591□WAG-15N8  
ctg4948□ctg262□ctg591□WAG-37A19  
ctg4948□ctg262□ctg591□WAG-38A22  
ctg4948□ctg262□ctg591□WAG-46O4  
ctg4948□ctg262□ctg591□WAG-49M12  
ctg4948□ctg262□ctg591□WAG-61K9  
ctg4948□ctg262□ctg591□WAG-75G24  
ctg4948□ctg262□ctg591□WAG-91K3  
ctg4948□ctg262□ctg591□WAG-92G20  
ctg4948□ctg262□ctg591□WAG-100N9  
ctg4948□ctg262□ctg591□WAG-125G4  
ctg4948□ctg376□ctg372□WAG-24E21  
ctg4948□ctg376□ctg372□WAG-27I17  
ctg4948□ctg376□ctg372□WAG-37P18  
ctg4948□ctg376□ctg372□WAG-40O16  
ctg4948□ctg376□ctg372□WAG-47I7  
ctg4948□ctg376□ctg372□WAG-51H1  
ctg4948□ctg376□ctg372□WAG-72P14  
ctg4948□ctg4319□□WAG-10P14  
ctg4948□ctg4319□ctg6640□WAG-61L3  
ctg4948□ctg4319□ctg6640□WAG-78K4

ctg4948□ctg622□ctg678□WAG-7K20  
ctg4948□ctg622□ctg678□WAG-26I17  
ctg4948□ctg622□ctg678□WAG-38K3  
ctg4948□ctg622□ctg678□WAG-44K11  
ctg4948□ctg622□ctg678□WAG-55A5  
ctg4948□ctg622□ctg678□WAG-57J22  
ctg4948□ctg622□ctg678□WAG-80L3  
ctg4948□ctg622□ctg678□WAG-83M16  
ctg4948□ctg622□ctg678□WAG-83N17  
ctg4948□ctg622□ctg678□WAG-118H9  
ctg4949□□□WAG-2B22  
ctg4949□□□WAG-14B22  
ctg4949□ctg2070□□WAG-72K14  
ctg4949□ctg2070□ctg2296□WAG-22H5  
ctg4949□ctg2070□ctg2296□WAG-110C17  
ctg4949□ctg2070□ctg2296□WAG-113M8  
ctg495□□□WAG-12O7  
ctg495□□□WAG-31A1  
ctg495□□□WAG-114G22  
ctg495□ctg1747□ctg2134□WAG-24F16  
ctg495□ctg1747□ctg2134□WAG-47K5  
ctg495□ctg1747□ctg2134□WAG-64M15  
ctg495□ctg1747□ctg2134□WAG-96M13  
ctg495□ctg1747□ctg2134□WAG-106O11  
ctg495□ctg1747□ctg6386□WAG-90M13  
ctg495□ctg1747□ctg6386□WAG-93L16  
ctg495□ctg1886□□WAG-112C24  
ctg495□ctg1886□ctg2065□WAG-24A21  
ctg495□ctg1886□ctg2065□WAG-59M19  
ctg495□ctg1886□ctg2065□WAG-70F1  
ctg495□ctg1886□ctg2065□WAG-71N12  
ctg495□ctg1886□ctg2065□WAG-97G15  
ctg495□ctg1886□ctg2065□WAG-110L20  
ctg495□ctg1886□ctg2065□WAG-111L16  
ctg495□ctg4769□ctg4982□WAG-28L6  
ctg495□ctg4769□ctg4982□WAG-43C16  
ctg4950□ctg1953□□WAG-42M7  
ctg4950□ctg1953□ctg2335□WAG-43K17  
ctg4950□ctg1953□ctg2335□WAG-44B5  
ctg4950□ctg1953□ctg2335□WAG-87E20  
ctg4951□ctg1055□□WAG-8B23  
ctg4951□ctg1055□□WAG-109L2  
ctg4951□ctg1055□ctg895□WAG-64J21  
ctg4951□ctg1055□ctg895□WAG-82C23  
ctg4951□ctg1055□ctg895□WAG-105A4  
ctg4951□ctg1055□ctg895□WAG-120P12  
ctg4952□□□WAG-124I19  
ctg4952□ctg193□□WAG-17J8  
ctg4952□ctg193□ctg202□WAG-9C15  
ctg4952□ctg193□ctg202□WAG-41I2  
ctg4952□ctg193□ctg202□WAG-51B3  
ctg4952□ctg193□ctg202□WAG-66C7  
ctg4952□ctg193□ctg202□WAG-82P17  
ctg4952□ctg193□ctg202□WAG-98B2  
ctg4952□ctg193□ctg202□WAG-101F21  
ctg4952□ctg193□ctg202□WAG-102L9



ctg4952□ctg193□ctg202□WAG-106K12  
ctg4952□ctg193□ctg202□WAG-109M12  
ctg4952□ctg193□ctg202□WAG-110D21  
ctg4952□ctg193□ctg202□WAG-115E8  
ctg4952□ctg193□ctg202□WAG-127I2  
ctg4952□ctg193□ctg202□WAG-127K2  
ctg4952□ctg193□ctg202□WAG-129O18  
ctg4952□ctg193□ctg2850□WAG-17B10  
ctg4952□ctg193□ctg2850□WAG-52B7  
ctg4952□ctg193□ctg2850□WAG-77N15  
ctg4953□□□WAG-71G1  
ctg4953□□□WAG-81M4  
ctg4953□ctg137□□WAG-65B6  
ctg4953□ctg137□□WAG-113K22  
ctg4953□ctg137□ctg108□WAG-2A2  
ctg4953□ctg137□ctg108□WAG-22F7  
ctg4953□ctg137□ctg108□WAG-42J20  
ctg4953□ctg137□ctg108□WAG-45I20  
ctg4953□ctg137□ctg108□WAG-53L6  
ctg4953□ctg137□ctg108□WAG-73C20  
ctg4953□ctg137□ctg108□WAG-94P17  
ctg4953□ctg137□ctg108□WAG-126M1  
ctg4953□ctg137□ctg3668□WAG-31K9  
ctg4953□ctg137□ctg3668□WAG-58M7  
ctg4953□ctg137□ctg3668□WAG-118O4  
ctg4953□ctg137□ctg3934□WAG-44F1  
ctg4953□ctg137□ctg3934□WAG-67J5  
ctg4953□ctg137□ctg3934□WAG-114H9  
ctg4953□ctg137□ctg5849□WAG-22J19  
ctg4953□ctg137□ctg5849□WAG-95K1  
ctg4953□ctg137□ctg652□WAG-54M14  
ctg4953□ctg137□ctg652□WAG-70J11  
ctg4953□ctg137□ctg652□WAG-72F8  
ctg4953□ctg137□ctg652□WAG-102D5  
ctg4953□ctg137□ctg652□WAG-117K13  
ctg4953□ctg2286□ctg2315□WAG-25D20  
ctg4953□ctg2286□ctg2315□WAG-102A24  
ctg4953□ctg2286□ctg2315□WAG-126D8  
ctg4953□ctg2286□ctg2986□WAG-8P4  
ctg4953□ctg2286□ctg2986□WAG-34H10  
ctg4953□ctg2286□ctg2986□WAG-49I2  
ctg4954□ctg2017□□WAG-51K11  
ctg4954□ctg2017□□WAG-51P16  
ctg4954□ctg2017□ctg2955□WAG-6A14  
ctg4954□ctg2017□ctg2955□WAG-6K7  
ctg4954□ctg2017□ctg2955□WAG-13A21  
ctg4954□ctg2017□ctg2955□WAG-57P20  
ctg4954□ctg2017□ctg3257□WAG-44G11  
ctg4954□ctg2017□ctg3257□WAG-72C23  
ctg4954□ctg2017□ctg6113□WAG-41D24  
ctg4954□ctg2017□ctg6113□WAG-63D1  
ctg4955□ctg2608□ctg2573□WAG-62J21  
ctg4955□ctg2608□ctg2573□WAG-88B18  
ctg4955□ctg2608□ctg2573□WAG-109C24  
ctg4955□ctg2608□ctg2573□WAG-113G12  
ctg4955□ctg2608□ctg3841□WAG-29H20

ctg4955□ctg2608□ctg3841□WAG-54D12  
ctg4955□ctg2608□ctg3841□WAG-73F19  
ctg4955□ctg4016□ctg4283□WAG-97D14  
ctg4955□ctg4016□ctg4283□WAG-117M8  
ctg4955□ctg6011□□WAG-19O22  
ctg4955□ctg6011□□WAG-112J18  
ctg4956□□□WAG-75N9  
ctg4956□ctg3226□ctg3258□WAG-4J5  
ctg4956□ctg3226□ctg3258□WAG-25A19  
ctg4956□ctg3226□ctg3258□WAG-64E19  
ctg4956□ctg62□□WAG-12I24  
ctg4956□ctg62□□WAG-110L1  
ctg4956□ctg62□ctg71□WAG-27D9  
ctg4956□ctg62□ctg71□WAG-27L22  
ctg4956□ctg62□ctg71□WAG-29L12  
ctg4956□ctg62□ctg71□WAG-58B3  
ctg4956□ctg62□ctg71□WAG-69M14  
ctg4956□ctg62□ctg71□WAG-76M10  
ctg4956□ctg62□ctg71□WAG-86J16  
ctg4956□ctg62□ctg71□WAG-92A13  
ctg4956□ctg62□ctg71□WAG-94P23  
ctg4956□ctg62□ctg71□WAG-97J15  
ctg4956□ctg62□ctg71□WAG-101H7  
ctg4956□ctg62□ctg71□WAG-116E4  
ctg4956□ctg62□ctg71□WAG-122E19  
ctg4956□ctg62□ctg71□WAG-124H18  
ctg4956□ctg62□ctg71□WAG-128E22  
ctg4956□ctg62□ctg71□WAG-130N4  
ctg4957□□□WAG-2I15  
ctg4957□ctg2326□□WAG-80F3  
ctg4957□ctg2326□ctg3012□WAG-25L11  
ctg4957□ctg2326□ctg3012□WAG-28G21  
ctg4957□ctg2326□ctg3012□WAG-83C21  
ctg4957□ctg2326□ctg3012□WAG-101H21  
ctg4957□ctg2614□ctg2580□WAG-26P4  
ctg4957□ctg2614□ctg2580□WAG-51K3  
ctg4957□ctg2614□ctg2580□WAG-52F7  
ctg4958□ctg3975□□WAG-46L4  
ctg4958□ctg3975□ctg5473□WAG-18D16  
ctg4958□ctg3975□ctg5473□WAG-79L3  
ctg4959□□□WAG-115B12  
ctg4959□ctg2464□ctg2379□WAG-12B9  
ctg4959□ctg2464□ctg2379□WAG-51E5  
ctg4959□ctg2464□ctg2379□WAG-101J4  
ctg496□ctg1107□ctg1240□WAG-13C9  
ctg496□ctg1107□ctg1240□WAG-52O4  
ctg496□ctg1107□ctg1240□WAG-103M20  
ctg496□ctg1107□ctg1240□WAG-106H8  
ctg496□ctg1107□ctg5374□WAG-119D3  
ctg496□ctg1107□ctg5374□WAG-130A9  
ctg4960□□□WAG-36N1  
ctg4960□□□WAG-113D24  
ctg4960□ctg1327□□WAG-3D7  
ctg4960□ctg1327□ctg1542□WAG-95A6  
ctg4960□ctg1327□ctg1542□WAG-102F2  
ctg4960□ctg1327□ctg1542□WAG-114F12

ctg4960□ctg1327□ctg1542□WAG-127D16  
ctg4960□ctg2335□□WAG-75O12  
ctg4960□ctg2335□ctg2898□WAG-30J12  
ctg4960□ctg2335□ctg2898□WAG-50P14  
ctg4960□ctg2335□ctg2898□WAG-81D10  
ctg4961□□□WAG-97C10  
ctg4961□ctg1167□ctg1016□WAG-24D10  
ctg4961□ctg1167□ctg1016□WAG-50I3  
ctg4961□ctg1167□ctg1016□WAG-85C10  
ctg4961□ctg1167□ctg1016□WAG-85H14  
ctg4961□ctg1167□ctg1016□WAG-85N18  
ctg4961□ctg1167□ctg1016□WAG-90H3  
ctg4961□ctg1714□□WAG-2K9  
ctg4961□ctg1714□ctg2090□WAG-37N5  
ctg4961□ctg1714□ctg2090□WAG-56J2  
ctg4961□ctg1714□ctg2090□WAG-126K23  
ctg4961□ctg2835□□WAG-130P17  
ctg4961□ctg2835□ctg4787□WAG-14J21  
ctg4961□ctg2835□ctg4787□WAG-125J18  
ctg4961□ctg2835□ctg5750□WAG-1D5  
ctg4961□ctg2835□ctg5750□WAG-78E16  
ctg4961□ctg3363□□WAG-15I12  
ctg4961□ctg3363□□WAG-83E13  
ctg4961□ctg3363□ctg6500□WAG-48I23  
ctg4961□ctg3363□ctg6500□WAG-80M5  
ctg4961□ctg4126□ctg5792□WAG-5F24  
ctg4961□ctg4126□ctg5792□WAG-22I21  
ctg4961□ctg4126□ctg5792□WAG-92J24  
ctg4962□ctg1091□ctg1547□WAG-14L1  
ctg4962□ctg1091□ctg1547□WAG-74I24  
ctg4962□ctg1091□ctg1547□WAG-118M19  
ctg4962□ctg1091□ctg1547□WAG-120M17  
ctg4962□ctg1091□ctg4768□WAG-85F24  
ctg4962□ctg1091□ctg4768□WAG-100I11  
ctg4962□ctg56□ctg44□WAG-5K7  
ctg4962□ctg56□ctg44□WAG-8I13  
ctg4962□ctg56□ctg44□WAG-17E11  
ctg4962□ctg56□ctg44□WAG-20J15  
ctg4962□ctg56□ctg44□WAG-45L10  
ctg4962□ctg56□ctg44□WAG-67H16  
ctg4962□ctg56□ctg44□WAG-73A1  
ctg4962□ctg56□ctg44□WAG-80E15  
ctg4962□ctg56□ctg44□WAG-121D6  
ctg4962□ctg56□ctg44□WAG-123L16  
ctg4962□ctg56□ctg44□WAG-126B22  
ctg4962□ctg56□ctg44□WAG-127M9  
ctg4963□□□WAG-2H18  
ctg4963□□□WAG-7C8  
ctg4963□□□WAG-89N12  
ctg4963□ctg523□□WAG-38K12  
ctg4963□ctg523□□WAG-52L14  
ctg4963□ctg523□□WAG-83H7  
ctg4963□ctg523□□WAG-90J22  
ctg4963□ctg523□□WAG-92K18  
ctg4963□ctg523□□WAG-104J9  
ctg4963□ctg523□ctg425□WAG-9O9

ctg4963□ctg523□ctg425□WAG-15A2  
ctg4963□ctg523□ctg425□WAG-23I24  
ctg4963□ctg523□ctg425□WAG-58P12  
ctg4963□ctg523□ctg425□WAG-74B21  
ctg4963□ctg523□ctg425□WAG-95G21  
ctg4963□ctg523□ctg425□WAG-99J4  
ctg4963□ctg523□ctg425□WAG-122M18  
ctg4963□ctg523□ctg425□WAG-126O24  
ctg4964□ctg1528□□WAG-12D23  
ctg4964□ctg1528□ctg1684□WAG-12B3  
ctg4964□ctg1528□ctg1684□WAG-21D23  
ctg4964□ctg1528□ctg1684□WAG-60F20  
ctg4964□ctg1528□ctg1684□WAG-83B11  
ctg4964□ctg1528□ctg1684□WAG-103D10  
ctg4964□ctg1528□ctg1684□WAG-118O10  
ctg4964□ctg890□□WAG-16I8  
ctg4964□ctg890□□WAG-111M8  
ctg4964□ctg890□ctg2699□WAG-18O5  
ctg4964□ctg890□ctg2699□WAG-20M2  
ctg4964□ctg890□ctg2699□WAG-80I20  
ctg4964□ctg890□ctg2699□WAG-84B1  
ctg4964□ctg890□ctg731□WAG-10G17  
ctg4964□ctg890□ctg731□WAG-86I7  
ctg4964□ctg890□ctg731□WAG-112L13  
ctg4964□ctg890□ctg731□WAG-112M12  
ctg4964□ctg890□ctg731□WAG-114D15  
ctg4964□ctg890□ctg731□WAG-126I2  
ctg4965□ctg1310□ctg2406□WAG-10D3  
ctg4965□ctg1310□ctg2406□WAG-60O2  
ctg4965□ctg1310□ctg2406□WAG-69N19  
ctg4965□ctg1310□ctg2406□WAG-75C6  
ctg4965□ctg1310□ctg2406□WAG-82D2  
ctg4965□ctg1310□ctg2406□WAG-82O15  
ctg4965□ctg1310□ctg2406□WAG-115C21  
ctg4966□ctg1900□ctg2355□WAG-1K1  
ctg4966□ctg1900□ctg2355□WAG-44L1  
ctg4966□ctg1900□ctg2355□WAG-89L3  
ctg4966□ctg1900□ctg5178□WAG-44P11  
ctg4966□ctg1900□ctg5178□WAG-61F18  
ctg4966□ctg38□□WAG-38O23  
ctg4966□ctg38□ctg25□WAG-29H2  
ctg4966□ctg38□ctg25□WAG-43P14  
ctg4966□ctg38□ctg25□WAG-47E8  
ctg4966□ctg38□ctg25□WAG-50D7  
ctg4966□ctg38□ctg25□WAG-53I9  
ctg4966□ctg38□ctg25□WAG-67P13  
ctg4966□ctg38□ctg25□WAG-84C2  
ctg4966□ctg38□ctg25□WAG-107O15  
ctg4966□ctg38□ctg25□WAG-111J11  
ctg4966□ctg38□ctg25□WAG-128A3  
ctg4967□□□WAG-5B6  
ctg4967□□□WAG-88G2  
ctg4967□□□WAG-92E1  
ctg4967□ctg4119□□WAG-28A15  
ctg4967□ctg4119□□WAG-84M3  
ctg4967□ctg4119□ctg4378□WAG-18M4

ctg4967□ctg4119□ctg4378□WAG-75H8  
ctg4967□ctg461□ctg4591□WAG-7O1  
ctg4967□ctg461□ctg4591□WAG-12O10  
ctg4967□ctg461□ctg469□WAG-14J24  
ctg4967□ctg461□ctg469□WAG-18C3  
ctg4967□ctg461□ctg469□WAG-25A22  
ctg4967□ctg461□ctg469□WAG-28B17  
ctg4967□ctg461□ctg469□WAG-46B4  
ctg4967□ctg461□ctg469□WAG-61N8  
ctg4967□ctg461□ctg469□WAG-64F18  
ctg4967□ctg461□ctg469□WAG-71L10  
ctg4967□ctg461□ctg469□WAG-79L12  
ctg4967□ctg461□ctg469□WAG-91L14  
ctg4967□ctg461□ctg469□WAG-100H2  
ctg4967□ctg461□ctg469□WAG-115D6  
ctg4967□ctg461□ctg469□WAG-128A4  
ctg4967□ctg461□ctg469□WAG-130L21  
ctg4968□□□WAG-36C10  
ctg4968□□□WAG-49N1  
ctg4968□ctg2707□ctg2690□WAG-56P10  
ctg4968□ctg2707□ctg2690□WAG-115J3  
ctg4968□ctg2707□ctg2690□WAG-119J15  
ctg4969□□□WAG-93C18  
ctg4969□ctg297□ctg418□WAG-1E7  
ctg4969□ctg297□ctg418□WAG-4L10  
ctg4969□ctg297□ctg418□WAG-8C13  
ctg4969□ctg297□ctg418□WAG-12C13  
ctg4969□ctg297□ctg418□WAG-57P1  
ctg4969□ctg297□ctg418□WAG-75I10  
ctg4969□ctg297□ctg418□WAG-83G24  
ctg4969□ctg297□ctg418□WAG-98D15  
ctg4969□ctg297□ctg418□WAG-98G10  
ctg4969□ctg297□ctg418□WAG-116O24  
ctg4969□ctg297□ctg418□WAG-123M12  
ctg4969□ctg370□□WAG-97F11  
ctg4969□ctg370□□WAG-123B6  
ctg4969□ctg370□ctg3467□WAG-81K4  
ctg4969□ctg370□ctg3467□WAG-104E9  
ctg4969□ctg370□ctg3467□WAG-127L7  
ctg4969□ctg370□ctg367□WAG-21O22  
ctg4969□ctg370□ctg367□WAG-69J10  
ctg4969□ctg370□ctg367□WAG-69K10  
ctg4969□ctg370□ctg367□WAG-82A23  
ctg4969□ctg370□ctg367□WAG-114C19  
ctg4969□ctg370□ctg367□WAG-129G10  
ctg4969□ctg370□ctg5946□WAG-6M17  
ctg4969□ctg370□ctg5946□WAG-13M10  
ctg4969□ctg5215□ctg5965□WAG-62F7  
ctg4969□ctg5215□ctg5965□WAG-73A9  
ctg497□□□WAG-14J14  
ctg497□□□WAG-107M19  
ctg497□ctg1323□□WAG-17N20  
ctg497□ctg1323□□WAG-31P3  
ctg497□ctg1323□□WAG-64P7  
ctg497□ctg1323□□WAG-120A21  
ctg497□ctg1323□ctg3146□WAG-17P16

ctg497□ctg1323□ctg3146□WAG-69C17  
ctg497□ctg1323□ctg3146□WAG-70G13  
ctg497□ctg1323□ctg3146□WAG-106H10  
ctg497□ctg1323□ctg3146□WAG-128G24  
ctg497□ctg6230□□WAG-53C3  
ctg497□ctg6230□□WAG-104J13  
ctg4970□□□WAG-63N2  
ctg4970□□□WAG-115K21  
ctg4970□ctg609□□WAG-4M7  
ctg4970□ctg609□□WAG-8N22  
ctg4970□ctg609□□WAG-9B1  
ctg4970□ctg609□□WAG-38A5  
ctg4970□ctg609□□WAG-63A6  
ctg4970□ctg609□□WAG-63O15  
ctg4970□ctg609□ctg527□WAG-84E21  
ctg4970□ctg609□ctg527□WAG-99N21  
ctg4970□ctg609□ctg527□WAG-106O4  
ctg4970□ctg609□ctg527□WAG-116E21  
ctg4970□ctg609□ctg527□WAG-121M22  
ctg4970□ctg609□ctg527□WAG-123B10  
ctg4970□ctg609□ctg6351□WAG-2F1  
ctg4970□ctg609□ctg6351□WAG-2L7  
ctg4970□ctg609□ctg742□WAG-7O24  
ctg4970□ctg609□ctg742□WAG-12O22  
ctg4970□ctg609□ctg742□WAG-18G5  
ctg4970□ctg609□ctg742□WAG-38J5  
ctg4970□ctg609□ctg742□WAG-40F2  
ctg4970□ctg609□ctg742□WAG-51O11  
ctg4970□ctg609□ctg742□WAG-52K12  
ctg4970□ctg609□ctg742□WAG-63N15  
ctg4970□ctg609□ctg742□WAG-88N20  
ctg4970□ctg609□ctg742□WAG-96D4  
ctg4970□ctg609□ctg742□WAG-118A23  
ctg4971□□□WAG-7A21  
ctg4971□□□WAG-42J15  
ctg4971□□□WAG-53J9  
ctg4971□□□WAG-70C3  
ctg4971□□□WAG-76L22  
ctg4971□□□WAG-96C21  
ctg4971□□□WAG-96H12  
ctg4971□ctg6351□□WAG-57C21  
ctg4971□ctg6351□□WAG-63E24  
ctg4971□ctg786□□WAG-21E2  
ctg4971□ctg786□□WAG-56N16  
ctg4971□ctg786□ctg1496□WAG-14K14  
ctg4971□ctg786□ctg1496□WAG-17J2  
ctg4971□ctg786□ctg1496□WAG-23J15  
ctg4971□ctg786□ctg1496□WAG-46M7  
ctg4971□ctg786□ctg1496□WAG-53J8  
ctg4971□ctg786□ctg1496□WAG-55J20  
ctg4971□ctg786□ctg1496□WAG-64P1  
ctg4971□ctg786□ctg1496□WAG-106L8  
ctg4971□ctg786□ctg3197□WAG-9K18  
ctg4971□ctg786□ctg3197□WAG-46G2  
ctg4971□ctg786□ctg3197□WAG-56A8  
ctg4972□ctg4019□ctg4287□WAG-38F15

ctg4972□ctg4019□ctg4287□WAG-85A18  
ctg4973□□□WAG-34J16  
ctg4973□□□WAG-69M16  
ctg4973□□□WAG-92M5  
ctg4973□□□WAG-98B6  
ctg4973□ctg171□ctg298□WAG-5P9  
ctg4973□ctg171□ctg298□WAG-19A14  
ctg4973□ctg171□ctg298□WAG-46J15  
ctg4973□ctg171□ctg298□WAG-65G22  
ctg4973□ctg171□ctg298□WAG-83M5  
ctg4973□ctg171□ctg298□WAG-94P16  
ctg4973□ctg171□ctg298□WAG-121D10  
ctg4973□ctg171□ctg298□WAG-125L3  
ctg4973□ctg524□ctg1383□WAG-20E4  
ctg4973□ctg524□ctg1383□WAG-21D11  
ctg4973□ctg524□ctg1383□WAG-26O4  
ctg4973□ctg524□ctg1383□WAG-33B14  
ctg4973□ctg524□ctg1383□WAG-71J24  
ctg4973□ctg524□ctg1383□WAG-82J1  
ctg4973□ctg524□ctg1383□WAG-87I2  
ctg4973□ctg524□ctg1383□WAG-103C6  
ctg4973□ctg524□ctg583□WAG-18K15  
ctg4973□ctg524□ctg583□WAG-32L8  
ctg4973□ctg524□ctg583□WAG-42M19  
ctg4973□ctg524□ctg583□WAG-42M21  
ctg4973□ctg524□ctg583□WAG-45J22  
ctg4973□ctg524□ctg583□WAG-63L16  
ctg4973□ctg524□ctg583□WAG-66K8  
ctg4973□ctg524□ctg583□WAG-93O8  
ctg4973□ctg524□ctg583□WAG-107P7  
ctg4973□ctg524□ctg583□WAG-114J9  
ctg4974□□□WAG-6C9  
ctg4974□□□WAG-59B13  
ctg4974□ctg3915□□WAG-14C16  
ctg4974□ctg3915□ctg5284□WAG-36N19  
ctg4974□ctg3915□ctg5284□WAG-91D23  
ctg4975□□□WAG-2J5  
ctg4975□□□WAG-102G1  
ctg4975□ctg5613□□WAG-37O8  
ctg4975□ctg5613□□WAG-38F9  
ctg4976□□□WAG-4I6  
ctg4976□□□WAG-26K6  
ctg4976□□□WAG-41D20  
ctg4976□□□WAG-58O15  
ctg4976□□□WAG-87F19  
ctg4976□ctg1282□ctg1131□WAG-60D23  
ctg4976□ctg1282□ctg1131□WAG-74I5  
ctg4976□ctg1282□ctg1131□WAG-87C24  
ctg4976□ctg4619□□WAG-124F10  
ctg4976□ctg4619□ctg6928□WAG-56N9  
ctg4976□ctg4619□ctg6928□WAG-84G2  
ctg4976□ctg6007□□WAG-1D9  
ctg4976□ctg6007□□WAG-43M15  
ctg4977□□□WAG-37M10  
ctg4977□□□WAG-116P7  
ctg4977□ctg4125□□WAG-102D24

ctg4977□ctg4125□ctg5709□WAG-98M7  
ctg4977□ctg4125□ctg5709□WAG-104G19  
ctg4978□□□WAG-14A16  
ctg4978□□□WAG-47I23  
ctg4978□□□WAG-54B14  
ctg4978□□□WAG-69G2  
ctg4978□ctg2241□ctg2771□WAG-6K5  
ctg4978□ctg2241□ctg2771□WAG-43I5  
ctg4978□ctg2241□ctg2771□WAG-120L20  
ctg4978□ctg2241□ctg2771□WAG-127L17  
ctg4979□ctg5566□□WAG-45B12  
ctg4979□ctg5566□□WAG-125P16  
ctg498□□□WAG-4O23  
ctg498□□□WAG-7O16  
ctg498□ctg1356□ctg1201□WAG-52E1  
ctg498□ctg1356□ctg1201□WAG-92O12  
ctg498□ctg1356□ctg1201□WAG-98K17  
ctg498□ctg1356□ctg1201□WAG-113A2  
ctg4980□ctg683□□WAG-76K6  
ctg4980□ctg683□ctg918□WAG-45G3  
ctg4980□ctg683□ctg918□WAG-64C16  
ctg4980□ctg683□ctg918□WAG-68I3  
ctg4980□ctg683□ctg918□WAG-68N14  
ctg4980□ctg683□ctg918□WAG-72O5  
ctg4980□ctg683□ctg918□WAG-79K17  
ctg4980□ctg683□ctg918□WAG-87A9  
ctg4980□ctg683□ctg918□WAG-107I14  
ctg4981□ctg24□□WAG-23H6  
ctg4981□ctg24□□WAG-125L24  
ctg4981□ctg24□ctg1277□WAG-37P21  
ctg4981□ctg24□ctg1277□WAG-52A9  
ctg4981□ctg24□ctg1277□WAG-57N8  
ctg4981□ctg24□ctg1277□WAG-66M1  
ctg4981□ctg24□ctg1277□WAG-85N9  
ctg4981□ctg24□ctg1277□WAG-86O19  
ctg4981□ctg24□ctg1277□WAG-97C17  
ctg4981□ctg24□ctg1277□WAG-107F4  
ctg4981□ctg24□ctg1277□WAG-122B16  
ctg4981□ctg24□ctg1277□WAG-124B2  
ctg4981□ctg24□ctg30□WAG-10D16  
ctg4981□ctg24□ctg30□WAG-17B16  
ctg4981□ctg24□ctg30□WAG-19L4  
ctg4981□ctg24□ctg30□WAG-40E1  
ctg4981□ctg24□ctg30□WAG-43D24  
ctg4981□ctg24□ctg30□WAG-44O23  
ctg4981□ctg24□ctg30□WAG-47M1  
ctg4981□ctg24□ctg30□WAG-56A10  
ctg4981□ctg24□ctg30□WAG-61M10  
ctg4981□ctg24□ctg30□WAG-61O10  
ctg4981□ctg24□ctg30□WAG-62I21  
ctg4981□ctg24□ctg30□WAG-64P2  
ctg4981□ctg24□ctg30□WAG-68E23  
ctg4981□ctg24□ctg30□WAG-68M24  
ctg4981□ctg24□ctg30□WAG-70B16  
ctg4981□ctg24□ctg30□WAG-75E9  
ctg4981□ctg24□ctg30□WAG-76F20



ctg4981□ctg24□ctg30□WAG-83C22  
ctg4981□ctg24□ctg30□WAG-92D16  
ctg4981□ctg24□ctg30□WAG-99H13  
ctg4981□ctg24□ctg30□WAG-104F4  
ctg4981□ctg24□ctg30□WAG-107O10  
ctg4981□ctg24□ctg30□WAG-110O20  
ctg4981□ctg24□ctg30□WAG-113K5  
ctg4981□ctg24□ctg30□WAG-125B18  
ctg4981□ctg24□ctg30□WAG-126I4  
ctg4982□□□WAG-98C7  
ctg4982□ctg1201□ctg1848□WAG-95O17  
ctg4982□ctg1201□ctg1848□WAG-100O21  
ctg4982□ctg1201□ctg1848□WAG-105B7  
ctg4982□ctg1201□ctg1848□WAG-121L6  
ctg4982□ctg1201□ctg5820□WAG-28O20  
ctg4982□ctg1201□ctg5820□WAG-51G9  
ctg4982□ctg554□□□WAG-13P8  
ctg4982□ctg554□□□WAG-82E23  
ctg4982□ctg554□□□WAG-104K14  
ctg4982□ctg554□ctg767□WAG-12I14  
ctg4982□ctg554□ctg767□WAG-41F23  
ctg4982□ctg554□ctg767□WAG-47M5  
ctg4982□ctg554□ctg767□WAG-57J12  
ctg4982□ctg554□ctg767□WAG-66N5  
ctg4982□ctg554□ctg767□WAG-88I13  
ctg4982□ctg554□ctg767□WAG-104K13  
ctg4983□ctg3820□□□WAG-36M2  
ctg4983□ctg3820□□□WAG-64G4  
ctg4983□ctg3820□ctg4077□WAG-36F16  
ctg4983□ctg3820□ctg4077□WAG-44O6  
ctg4983□ctg3820□ctg4077□WAG-113N9  
ctg4984□ctg332□□□WAG-113F10  
ctg4984□ctg332□ctg421□WAG-9A19  
ctg4984□ctg332□ctg421□WAG-10J2  
ctg4984□ctg332□ctg421□WAG-13P2  
ctg4984□ctg332□ctg421□WAG-18N9  
ctg4984□ctg332□ctg421□WAG-20C21  
ctg4984□ctg332□ctg421□WAG-28N18  
ctg4984□ctg332□ctg421□WAG-36E11  
ctg4984□ctg332□ctg421□WAG-37E12  
ctg4984□ctg332□ctg421□WAG-49I16  
ctg4984□ctg332□ctg421□WAG-51M4  
ctg4984□ctg332□ctg421□WAG-53K18  
ctg4984□ctg332□ctg421□WAG-60I10  
ctg4984□ctg332□ctg421□WAG-68G12  
ctg4984□ctg332□ctg421□WAG-95M16  
ctg4985□ctg3473□□□WAG-79D4  
ctg4985□ctg3473□ctg4537□WAG-59L23  
ctg4985□ctg3473□ctg4537□WAG-102K18  
ctg4986□ctg427□□□WAG-13C14  
ctg4986□ctg427□ctg462□WAG-1H4  
ctg4986□ctg427□ctg462□WAG-39K15  
ctg4986□ctg427□ctg462□WAG-42A18  
ctg4986□ctg427□ctg462□WAG-52F3  
ctg4986□ctg427□ctg462□WAG-56J1  
ctg4986□ctg427□ctg462□WAG-59J11

ctg4986□ctg427□ctg462□WAG-64E9  
ctg4986□ctg427□ctg462□WAG-91O18  
ctg4986□ctg427□ctg462□WAG-104A3  
ctg4986□ctg427□ctg462□WAG-105L16  
ctg4986□ctg771□□WAG-49I9  
ctg4986□ctg771□□WAG-111H8  
ctg4986□ctg771□ctg624□WAG-38L3  
ctg4986□ctg771□ctg624□WAG-44D11  
ctg4986□ctg771□ctg624□WAG-44H2  
ctg4986□ctg771□ctg624□WAG-81F23  
ctg4986□ctg771□ctg624□WAG-81L16  
ctg4986□ctg771□ctg624□WAG-81O24  
ctg4986□ctg771□ctg624□WAG-86J8  
ctg4986□ctg771□ctg624□WAG-86K17  
ctg4986□ctg771□ctg624□WAG-90I4  
ctg4986□ctg771□ctg624□WAG-104N7  
ctg4986□ctg771□ctg624□WAG-121O9  
ctg4987□□□WAG-53G20  
ctg4987□□□WAG-73M21  
ctg4987□ctg196□□WAG-50A17  
ctg4987□ctg196□ctg593□WAG-5M9  
ctg4987□ctg196□ctg593□WAG-16O19  
ctg4987□ctg196□ctg593□WAG-30A4  
ctg4987□ctg196□ctg593□WAG-46B24  
ctg4987□ctg196□ctg593□WAG-47B14  
ctg4987□ctg196□ctg593□WAG-71H15  
ctg4987□ctg196□ctg593□WAG-91P2  
ctg4987□ctg196□ctg593□WAG-109P16  
ctg4987□ctg196□ctg593□WAG-110O18  
ctg4987□ctg196□ctg593□WAG-118H2  
ctg4987□ctg196□ctg593□WAG-119K4  
ctg4987□ctg196□ctg593□WAG-122A3  
ctg4987□ctg196□ctg593□WAG-124G24  
ctg4987□ctg3535□□WAG-87K24  
ctg4987□ctg3535□ctg4576□WAG-25F18  
ctg4987□ctg3535□ctg4576□WAG-25P8  
ctg4988□□□WAG-60A18  
ctg4988□ctg2208□□WAG-45K5  
ctg4988□ctg2208□□WAG-51B22  
ctg4988□ctg2208□□WAG-92M20  
ctg4988□ctg2208□ctg3476□WAG-78H6  
ctg4988□ctg2208□ctg3476□WAG-99P14  
ctg4988□ctg259□□WAG-97L22  
ctg4988□ctg259□ctg2055□WAG-20B18  
ctg4988□ctg259□ctg2055□WAG-96I11  
ctg4988□ctg259□ctg2055□WAG-98D22  
ctg4988□ctg259□ctg2055□WAG-112J8  
ctg4988□ctg259□ctg253□WAG-12H4  
ctg4988□ctg259□ctg253□WAG-14H19  
ctg4988□ctg259□ctg253□WAG-15F17  
ctg4988□ctg259□ctg253□WAG-60P23  
ctg4988□ctg259□ctg253□WAG-103G23  
ctg4988□ctg259□ctg253□WAG-105D19  
ctg4988□ctg259□ctg253□WAG-128F7  
ctg4988□ctg559□□WAG-20I11  
ctg4988□ctg559□□WAG-20P19

ctg4988□ctg559□□WAG-47O22  
ctg4988□ctg559□□WAG-128I14  
ctg4988□ctg559□ctg2426□WAG-62L11  
ctg4988□ctg559□ctg2426□WAG-83J20  
ctg4988□ctg559□ctg2426□WAG-83N16  
ctg4988□ctg559□ctg2426□WAG-88D10  
ctg4988□ctg559□ctg804□WAG-20K15  
ctg4988□ctg559□ctg804□WAG-26H13  
ctg4988□ctg559□ctg804□WAG-55L23  
ctg4988□ctg559□ctg804□WAG-67K18  
ctg4988□ctg559□ctg804□WAG-111I23  
ctg4988□ctg559□ctg804□WAG-112A14  
ctg4988□ctg559□ctg804□WAG-113J4  
ctg4989□□□WAG-7K22  
ctg4989□□□WAG-34P14  
ctg4989□□□WAG-41J15  
ctg4989□□□WAG-53E8  
ctg4989□ctg1056□ctg1226□WAG-41J14  
ctg4989□ctg1056□ctg1226□WAG-66A22  
ctg4989□ctg1056□ctg1226□WAG-113C17  
ctg4989□ctg1056□ctg1226□WAG-114L12  
ctg4989□ctg1056□ctg1226□WAG-119O4  
ctg4989□ctg1056□ctg1226□WAG-128J7  
ctg4989□ctg147□ctg167□WAG-8B20  
ctg4989□ctg147□ctg167□WAG-11J13  
ctg4989□ctg147□ctg167□WAG-29O24  
ctg4989□ctg147□ctg167□WAG-35M19  
ctg4989□ctg147□ctg167□WAG-37I3  
ctg4989□ctg147□ctg167□WAG-56M16  
ctg4989□ctg147□ctg167□WAG-58A13  
ctg4989□ctg147□ctg167□WAG-112A17  
ctg4989□ctg147□ctg167□WAG-115F11  
ctg499□□□WAG-61C16  
ctg499□ctg1120□□WAG-51I16  
ctg499□ctg1120□ctg955□WAG-17M7  
ctg499□ctg1120□ctg955□WAG-69N4  
ctg499□ctg1120□ctg955□WAG-70J2  
ctg499□ctg1120□ctg955□WAG-77O14  
ctg499□ctg1120□ctg955□WAG-128F13  
ctg4990□ctg791□ctg1602□WAG-1C12  
ctg4990□ctg791□ctg1602□WAG-46C15  
ctg4990□ctg791□ctg1602□WAG-48P15  
ctg4990□ctg791□ctg1602□WAG-51A17  
ctg4990□ctg791□ctg1602□WAG-51E10  
ctg4990□ctg791□ctg1602□WAG-72K9  
ctg4990□ctg791□ctg1602□WAG-73I14  
ctg4990□ctg791□ctg1602□WAG-77M13  
ctg4990□ctg791□ctg1602□WAG-94D13  
ctg4990□ctg791□ctg1602□WAG-98I1  
ctg4990□ctg791□ctg1602□WAG-105F14  
ctg4990□ctg791□ctg1602□WAG-112E12  
ctg4990□ctg791□ctg2211□WAG-8N17  
ctg4990□ctg791□ctg2211□WAG-36H17  
ctg4990□ctg791□ctg2211□WAG-49M23  
ctg4990□ctg791□ctg2211□WAG-53K6  
ctg4991□□□WAG-5K15

ctg4991□□□WAG-28G16  
ctg4991□□□WAG-38C7  
ctg4991□□□WAG-106N3  
ctg4991□ctg2304□□WAG-24K21  
ctg4991□ctg2304□□WAG-71F14  
ctg4991□ctg2304□□WAG-85G19  
ctg4991□ctg2304□ctg2483□WAG-14F1  
ctg4991□ctg2304□ctg2483□WAG-41B23  
ctg4991□ctg2304□ctg2483□WAG-112P9  
ctg4991□ctg2304□ctg2483□WAG-117G7  
ctg4991□ctg2304□ctg2483□WAG-121A1  
ctg4992□□□WAG-16K17  
ctg4992□□□WAG-124C7  
ctg4992□ctg2135□ctg2005□WAG-8N18  
ctg4992□ctg2135□ctg2005□WAG-82K5  
ctg4992□ctg2135□ctg2005□WAG-130B16  
ctg4993□□□WAG-25G1  
ctg4993□ctg2016□□WAG-92L9  
ctg4993□ctg2016□ctg2433□WAG-95H16  
ctg4993□ctg2016□ctg2433□WAG-115H16  
ctg4993□ctg2016□ctg2433□WAG-116B5  
ctg4993□ctg4761□ctg4969□WAG-80J11  
ctg4993□ctg4761□ctg4969□WAG-81K15  
ctg4994□□□WAG-63A21  
ctg4994□ctg1735□□WAG-7M5  
ctg4994□ctg1735□□WAG-28F21  
ctg4994□ctg1735□ctg1579□WAG-16O10  
ctg4994□ctg1735□ctg1579□WAG-25B22  
ctg4994□ctg1735□ctg1579□WAG-68P7  
ctg4994□ctg1735□ctg1579□WAG-113N13  
ctg4994□ctg1735□ctg1579□WAG-123B14  
ctg4994□ctg276□□WAG-93A13  
ctg4994□ctg276□□WAG-106L18  
ctg4994□ctg276□ctg364□WAG-12E22  
ctg4994□ctg276□ctg364□WAG-24D8  
ctg4994□ctg276□ctg364□WAG-42K1  
ctg4994□ctg276□ctg364□WAG-44C3  
ctg4994□ctg276□ctg364□WAG-55I10  
ctg4994□ctg276□ctg364□WAG-56I13  
ctg4994□ctg276□ctg364□WAG-82M7  
ctg4994□ctg276□ctg364□WAG-88E24  
ctg4994□ctg276□ctg364□WAG-92H10  
ctg4994□ctg276□ctg364□WAG-114E21  
ctg4994□ctg276□ctg364□WAG-122C21  
ctg4995□ctg735□ctg753□WAG-9C7  
ctg4995□ctg735□ctg753□WAG-36A10  
ctg4995□ctg735□ctg753□WAG-48M8  
ctg4995□ctg735□ctg753□WAG-53H15  
ctg4995□ctg735□ctg753□WAG-63A18  
ctg4995□ctg735□ctg753□WAG-72G4  
ctg4995□ctg735□ctg753□WAG-73D10  
ctg4995□ctg735□ctg753□WAG-77A9  
ctg4995□ctg735□ctg753□WAG-104C23  
ctg4995□ctg735□ctg753□WAG-111C10  
ctg4995□ctg735□ctg753□WAG-118P13  
ctg4996□□□WAG-12C22

ctg4996□□□WAG-37A1  
ctg4996□□□WAG-39J5  
ctg4996□□□WAG-39M14  
ctg4996□□□WAG-95C2  
ctg4996□ctg2053□□WAG-115C24  
ctg4996□ctg2053□ctg2122□WAG-55J21  
ctg4996□ctg2053□ctg2122□WAG-59B21  
ctg4996□ctg2053□ctg2122□WAG-104P22  
ctg4996□ctg2053□ctg2122□WAG-121B2  
ctg4996□ctg2053□ctg3478□WAG-55F17  
ctg4996□ctg2053□ctg3478□WAG-55I9  
ctg4996□ctg2053□ctg3744□WAG-64D16  
ctg4996□ctg2053□ctg3744□WAG-96J14  
ctg4996□ctg633□□WAG-95H11  
ctg4996□ctg633□ctg635□WAG-4C22  
ctg4996□ctg633□ctg635□WAG-33F14  
ctg4996□ctg633□ctg635□WAG-61P16  
ctg4996□ctg633□ctg635□WAG-79H9  
ctg4996□ctg633□ctg635□WAG-94F8  
ctg4996□ctg633□ctg635□WAG-96B15  
ctg4996□ctg633□ctg635□WAG-99G7  
ctg4996□ctg633□ctg635□WAG-103I7  
ctg4996□ctg633□ctg635□WAG-112M22  
ctg4996□ctg633□ctg635□WAG-116F16  
ctg4996□ctg633□ctg635□WAG-122C3  
ctg4996□ctg633□ctg635□WAG-123H7  
ctg4996□ctg633□ctg635□WAG-125D9  
ctg4996□ctg633□ctg635□WAG-129P22  
ctg4997□□□WAG-16E20  
ctg4997□□□WAG-16I24  
ctg4997□□□WAG-110M4  
ctg4997□ctg199□□WAG-86I15  
ctg4997□ctg199□□WAG-112I23  
ctg4997□ctg199□ctg267□WAG-1J16  
ctg4997□ctg199□ctg267□WAG-21E3  
ctg4997□ctg199□ctg267□WAG-27K11  
ctg4997□ctg199□ctg267□WAG-27P19  
ctg4997□ctg199□ctg267□WAG-39N22  
ctg4997□ctg199□ctg267□WAG-43C3  
ctg4997□ctg199□ctg267□WAG-47P18  
ctg4997□ctg199□ctg267□WAG-56O1  
ctg4997□ctg199□ctg267□WAG-78C23  
ctg4997□ctg199□ctg267□WAG-79H23  
ctg4997□ctg199□ctg267□WAG-96N17  
ctg4997□ctg199□ctg267□WAG-99H1  
ctg4997□ctg199□ctg267□WAG-109F10  
ctg4997□ctg199□ctg267□WAG-120L7  
ctg4997□ctg199□ctg267□WAG-127N14  
ctg4997□ctg199□ctg6322□WAG-61G1  
ctg4997□ctg199□ctg6322□WAG-70N11  
ctg4998□ctg159□□WAG-22L14  
ctg4998□ctg159□□WAG-23C19  
ctg4998□ctg159□ctg165□WAG-9D3  
ctg4998□ctg159□ctg165□WAG-11N9  
ctg4998□ctg159□ctg165□WAG-14K1  
ctg4998□ctg159□ctg165□WAG-15L5

ctg4998□ctg159□ctg165□WAG-19F15  
ctg4998□ctg159□ctg165□WAG-36K13  
ctg4998□ctg159□ctg165□WAG-53B1  
ctg4998□ctg159□ctg165□WAG-75B14  
ctg4998□ctg159□ctg165□WAG-79D9  
ctg4998□ctg159□ctg165□WAG-97M4  
ctg4998□ctg159□ctg165□WAG-110P3  
ctg4998□ctg159□ctg165□WAG-119E24  
ctg4998□ctg159□ctg165□WAG-120O12  
ctg4998□ctg159□ctg165□WAG-121K16  
ctg4998□ctg159□ctg1726□WAG-1K11  
ctg4998□ctg159□ctg1726□WAG-29O6  
ctg4998□ctg159□ctg1726□WAG-30I6  
ctg4998□ctg159□ctg1726□WAG-54L23  
ctg4998□ctg159□ctg1726□WAG-58J16  
ctg4998□ctg159□ctg1726□WAG-93E23  
ctg4998□ctg159□ctg1726□WAG-100N24  
ctg4998□ctg159□ctg1726□WAG-113E23  
ctg4999□ctg835□□WAG-69N15  
ctg4999□ctg835□ctg829□WAG-10O15  
ctg4999□ctg835□ctg829□WAG-12P7  
ctg4999□ctg835□ctg829□WAG-74J4  
ctg4999□ctg835□ctg829□WAG-86K9  
ctg4999□ctg835□ctg829□WAG-96L14  
ctg5□ctg4586□ctg4743□WAG-81L19  
ctg5□ctg4586□ctg4743□WAG-97D11  
ctg5□ctg679□□WAG-53P15  
ctg5□ctg679□□WAG-124D18  
ctg5□ctg679□ctg694□WAG-8B17  
ctg5□ctg679□ctg694□WAG-17P5  
ctg5□ctg679□ctg694□WAG-64K14  
ctg5□ctg679□ctg694□WAG-75F21  
ctg5□ctg679□ctg694□WAG-84J12  
ctg5□ctg679□ctg694□WAG-105F18  
ctg5□ctg679□ctg694□WAG-119J19  
ctg5□ctg679□ctg694□WAG-127B11  
ctg50□ctg164□ctg130□WAG-75B17  
ctg50□ctg164□ctg130□WAG-83H8  
ctg50□ctg164□ctg130□WAG-101F7  
ctg50□ctg164□ctg130□WAG-101P6  
ctg50□ctg164□ctg130□WAG-108H14  
ctg50□ctg164□ctg130□WAG-129H14  
ctg500□□□WAG-90A10  
ctg500□ctg1360□□WAG-15D12  
ctg500□ctg1360□□WAG-80P8  
ctg500□ctg1360□ctg1635□WAG-3L9  
ctg500□ctg1360□ctg1635□WAG-33N12  
ctg500□ctg1360□ctg1635□WAG-56H3  
ctg500□ctg1360□ctg1635□WAG-97I22  
ctg500□ctg1360□ctg1635□WAG-105E10  
ctg5000□□□WAG-18K11  
ctg5000□□□WAG-30L19  
ctg5000□□□WAG-85N24  
ctg5000□□□WAG-102I3  
ctg5000□□□WAG-107C14  
ctg5000□ctg13□□WAG-115O24

ctg5000□ctg13□□WAG-116B24  
ctg5000□ctg13□□WAG-116I23  
ctg5000□ctg13□ctg16□WAG-8P15  
ctg5000□ctg13□ctg16□WAG-19P1  
ctg5000□ctg13□ctg16□WAG-21C7  
ctg5000□ctg13□ctg16□WAG-24N20  
ctg5000□ctg13□ctg16□WAG-25F2  
ctg5000□ctg13□ctg16□WAG-55M1  
ctg5000□ctg13□ctg16□WAG-77H13  
ctg5000□ctg13□ctg16□WAG-85E11  
ctg5000□ctg13□ctg16□WAG-94A7  
ctg5000□ctg13□ctg16□WAG-99D11  
ctg5000□ctg13□ctg16□WAG-110K2  
ctg5000□ctg13□ctg16□WAG-117N2  
ctg5000□ctg13□ctg16□WAG-124N3  
ctg5000□ctg13□ctg16□WAG-125P19  
ctg5000□ctg13□ctg16□WAG-128A16  
ctg5000□ctg13□ctg2353□WAG-33D4  
ctg5000□ctg13□ctg2353□WAG-128K11  
ctg5000□ctg13□ctg2353□WAG-129D12  
ctg5000□ctg13□ctg965□WAG-83E6  
ctg5000□ctg13□ctg965□WAG-90E4  
ctg5000□ctg13□ctg965□WAG-115P9  
ctg5000□ctg13□ctg965□WAG-123G19  
ctg5001□ctg1109□□WAG-37H15  
ctg5001□ctg1109□□WAG-45I1  
ctg5001□ctg1109□□WAG-57L17  
ctg5001□ctg1109□□WAG-121I2  
ctg5001□ctg1109□ctg2181□WAG-29D18  
ctg5001□ctg1109□ctg2181□WAG-55J5  
ctg5001□ctg1109□ctg2181□WAG-78L3  
ctg5001□ctg1109□ctg2181□WAG-107D23  
ctg5001□ctg1109□ctg2181□WAG-114G14  
ctg5001□ctg1109□ctg2181□WAG-118A18  
ctg5002□ctg1252□ctg1691□WAG-28P9  
ctg5002□ctg1252□ctg1691□WAG-49K24  
ctg5002□ctg1252□ctg1691□WAG-85E1  
ctg5002□ctg1252□ctg1691□WAG-92D17  
ctg5002□ctg1252□ctg1711□WAG-44D23  
ctg5002□ctg1252□ctg1711□WAG-53E24  
ctg5002□ctg1252□ctg1711□WAG-62G3  
ctg5002□ctg1252□ctg1711□WAG-117N1  
ctg5002□ctg1252□ctg2838□WAG-57F1  
ctg5002□ctg1252□ctg2838□WAG-60M9  
ctg5002□ctg1252□ctg2838□WAG-62D13  
ctg5002□ctg1252□ctg2838□WAG-113M6  
ctg5002□ctg1252□ctg5611□WAG-10G20  
ctg5002□ctg1252□ctg5611□WAG-49H11  
ctg5002□ctg3457□ctg3574□WAG-15H17  
ctg5002□ctg3457□ctg3574□WAG-64L14  
ctg5002□ctg3457□ctg3574□WAG-114D16  
ctg5003□ctg85□□WAG-44P12  
ctg5003□ctg85□□WAG-105I22  
ctg5003□ctg85□□WAG-115K4  
ctg5003□ctg85□ctg1535□WAG-20J4  
ctg5003□ctg85□ctg1535□WAG-43H3

ctg5003□ctg85□ctg1535□WAG-45J9  
ctg5003□ctg85□ctg1535□WAG-64N1  
ctg5003□ctg85□ctg1535□WAG-117O3  
ctg5003□ctg85□ctg2790□WAG-41G13  
ctg5003□ctg85□ctg2790□WAG-80B3  
ctg5003□ctg85□ctg2790□WAG-117D3  
ctg5003□ctg85□ctg3899□WAG-30C15  
ctg5003□ctg85□ctg3899□WAG-30P5  
ctg5003□ctg85□ctg3899□WAG-72I22  
ctg5003□ctg85□ctg93□WAG-3D2  
ctg5003□ctg85□ctg93□WAG-14F18  
ctg5003□ctg85□ctg93□WAG-17F4  
ctg5003□ctg85□ctg93□WAG-32O18  
ctg5003□ctg85□ctg93□WAG-54F19  
ctg5003□ctg85□ctg93□WAG-74F16  
ctg5003□ctg85□ctg93□WAG-82E1  
ctg5003□ctg85□ctg93□WAG-85M3  
ctg5003□ctg85□ctg93□WAG-92L5  
ctg5003□ctg85□ctg93□WAG-100A16  
ctg5003□ctg85□ctg93□WAG-109O12  
ctg5003□ctg85□ctg93□WAG-110K21  
ctg5004□□□WAG-20E16  
ctg5004□□□WAG-31O18  
ctg5004□□□WAG-35O5  
ctg5004□□□WAG-72N18  
ctg5004□□□WAG-75M24  
ctg5004□ctg2806□□WAG-113L16  
ctg5004□ctg2806□ctg3387□WAG-24A20  
ctg5004□ctg2806□ctg3387□WAG-49I24  
ctg5004□ctg2806□ctg3387□WAG-53P10  
ctg5004□ctg2806□ctg3387□WAG-68P15  
ctg5004□ctg2806□ctg3387□WAG-105O8  
ctg5004□ctg78□ctg72□WAG-4I4  
ctg5004□ctg78□ctg72□WAG-26G18  
ctg5004□ctg78□ctg72□WAG-29H9  
ctg5004□ctg78□ctg72□WAG-44J14  
ctg5004□ctg78□ctg72□WAG-46O16  
ctg5004□ctg78□ctg72□WAG-56A9  
ctg5004□ctg78□ctg72□WAG-61B13  
ctg5004□ctg78□ctg72□WAG-65M10  
ctg5004□ctg78□ctg72□WAG-66K7  
ctg5004□ctg78□ctg72□WAG-68G19  
ctg5004□ctg78□ctg72□WAG-103B23  
ctg5004□ctg78□ctg72□WAG-119O7  
ctg5005□ctg36□□WAG-116K19  
ctg5005□ctg36□ctg2103□WAG-42D22  
ctg5005□ctg36□ctg2103□WAG-44G10  
ctg5005□ctg36□ctg2103□WAG-59K5  
ctg5005□ctg36□ctg2674□WAG-10P24  
ctg5005□ctg36□ctg2674□WAG-40C9  
ctg5005□ctg36□ctg2674□WAG-76E20  
ctg5005□ctg36□ctg2674□WAG-87M8  
ctg5005□ctg36□ctg2674□WAG-89C19  
ctg5005□ctg36□ctg2674□WAG-104L19  
ctg5005□ctg36□ctg40□WAG-10D2  
ctg5005□ctg36□ctg40□WAG-10G12



ctg5005□ctg36□ctg40□WAG-15A7  
ctg5005□ctg36□ctg40□WAG-17J16  
ctg5005□ctg36□ctg40□WAG-28L11  
ctg5005□ctg36□ctg40□WAG-39J21  
ctg5005□ctg36□ctg40□WAG-42N22  
ctg5005□ctg36□ctg40□WAG-48A10  
ctg5005□ctg36□ctg40□WAG-52J16  
ctg5005□ctg36□ctg40□WAG-55M18  
ctg5005□ctg36□ctg40□WAG-56A6  
ctg5005□ctg36□ctg40□WAG-60M3  
ctg5005□ctg36□ctg40□WAG-69M15  
ctg5005□ctg36□ctg40□WAG-76E23  
ctg5005□ctg36□ctg40□WAG-83I9  
ctg5005□ctg36□ctg40□WAG-88M3  
ctg5005□ctg36□ctg40□WAG-90J7  
ctg5005□ctg36□ctg40□WAG-94H15  
ctg5005□ctg36□ctg40□WAG-99E22  
ctg5005□ctg36□ctg40□WAG-103N5  
ctg5005□ctg36□ctg40□WAG-106F2  
ctg5005□ctg36□ctg40□WAG-108E19  
ctg5005□ctg36□ctg40□WAG-119B7  
ctg5005□ctg36□ctg40□WAG-123C1  
ctg5005□ctg36□ctg40□WAG-126P19  
ctg5005□ctg36□ctg40□WAG-129A1  
ctg5005□ctg36□ctg40□WAG-129C10  
ctg5005□ctg36□ctg4139□WAG-58B22  
ctg5005□ctg36□ctg4139□WAG-65N2  
ctg5005□ctg36□ctg5573□WAG-49P18  
ctg5005□ctg36□ctg5573□WAG-78M19  
ctg5006□□□WAG-77O19  
ctg5006□ctg1777□ctg1613□WAG-20G21  
ctg5006□ctg1777□ctg1613□WAG-47H22  
ctg5006□ctg1777□ctg1613□WAG-66O7  
ctg5006□ctg1777□ctg1613□WAG-78B10  
ctg5006□ctg1777□ctg1613□WAG-87B24  
ctg5006□ctg1777□ctg1613□WAG-103P2  
ctg5006□ctg1777□ctg1613□WAG-108N14  
ctg5006□ctg1777□ctg1613□WAG-120C17  
ctg5006□ctg1777□ctg2377□WAG-59H4  
ctg5006□ctg1777□ctg2377□WAG-69M11  
ctg5006□ctg1777□ctg2377□WAG-69N16  
ctg5006□ctg1777□ctg2377□WAG-90N18  
ctg5006□ctg1777□ctg2377□WAG-100D20  
ctg5006□ctg4718□ctg4904□WAG-49A3  
ctg5006□ctg4718□ctg4904□WAG-74E17  
ctg5006□ctg843□□WAG-45O1  
ctg5006□ctg843□ctg689□WAG-104B9  
ctg5006□ctg843□ctg689□WAG-107L21  
ctg5006□ctg843□ctg689□WAG-120A22  
ctg5006□ctg843□ctg689□WAG-121E8  
ctg5006□ctg843□ctg689□WAG-126A8  
ctg5007□ctg1343□□WAG-9H24  
ctg5007□ctg1343□□WAG-57I17  
ctg5007□ctg1343□ctg1974□WAG-9H21  
ctg5007□ctg1343□ctg1974□WAG-55N2  
ctg5007□ctg1343□ctg1974□WAG-56A20

ctg5007□ctg1343□ctg1974□WAG-56J3  
ctg5007□ctg1343□ctg1974□WAG-61K3  
ctg5007□ctg1343□ctg1974□WAG-75A6  
ctg5007□ctg1343□ctg1974□WAG-81D22  
ctg5007□ctg1343□ctg1974□WAG-118J17  
ctg5007□ctg1343□ctg4297□WAG-60C20  
ctg5007□ctg1343□ctg4297□WAG-67K11  
ctg5007□ctg1343□ctg4297□WAG-69A11  
ctg5007□ctg1343□ctg4694□WAG-85I5  
ctg5007□ctg1343□ctg4694□WAG-101C22  
ctg5007□ctg261□□WAG-64K23  
ctg5007□ctg261□□WAG-97K14  
ctg5007□ctg261□ctg2661□WAG-54N21  
ctg5007□ctg261□ctg2661□WAG-58P11  
ctg5007□ctg261□ctg2661□WAG-97F10  
ctg5007□ctg261□ctg2661□WAG-103O21  
ctg5007□ctg261□ctg347□WAG-15F9  
ctg5007□ctg261□ctg347□WAG-37A2  
ctg5007□ctg261□ctg347□WAG-38D22  
ctg5007□ctg261□ctg347□WAG-61D20  
ctg5007□ctg261□ctg347□WAG-68F22  
ctg5007□ctg261□ctg347□WAG-68M15  
ctg5007□ctg261□ctg347□WAG-97B16  
ctg5007□ctg261□ctg347□WAG-103J9  
ctg5007□ctg261□ctg347□WAG-111I6  
ctg5007□ctg261□ctg347□WAG-119P7  
ctg5007□ctg2652□□WAG-39O3  
ctg5007□ctg2652□ctg2621□WAG-69F24  
ctg5007□ctg2652□ctg2621□WAG-91M14  
ctg5007□ctg2652□ctg2621□WAG-94P1  
ctg5008□□□WAG-48E22  
ctg5008□□□WAG-62N8  
ctg5008□□□WAG-104J3  
ctg5008□ctg286□□WAG-70B15  
ctg5008□ctg286□□WAG-114E22  
ctg5008□ctg286□ctg1367□WAG-18J5  
ctg5008□ctg286□ctg1367□WAG-46K2  
ctg5008□ctg286□ctg1367□WAG-53N12  
ctg5008□ctg286□ctg1367□WAG-61C4  
ctg5008□ctg286□ctg1367□WAG-64A11  
ctg5008□ctg286□ctg1367□WAG-73I12  
ctg5008□ctg286□ctg1367□WAG-83A17  
ctg5008□ctg286□ctg1367□WAG-89J1  
ctg5008□ctg286□ctg1367□WAG-98G23  
ctg5008□ctg286□ctg1367□WAG-116B23  
ctg5008□ctg286□ctg1367□WAG-116O18  
ctg5008□ctg286□ctg6957□WAG-19I15  
ctg5008□ctg286□ctg6957□WAG-99D16  
ctg5009□□□WAG-55D6  
ctg5009□ctg313□□WAG-74F19  
ctg5009□ctg313□□WAG-115F21  
ctg5009□ctg313□ctg389□WAG-13L10  
ctg5009□ctg313□ctg389□WAG-15A10  
ctg5009□ctg313□ctg389□WAG-58N18  
ctg5009□ctg313□ctg389□WAG-62P16  
ctg5009□ctg313□ctg389□WAG-72P4

ctg5009□ctg313□ctg389□WAG-95P7  
ctg5009□ctg313□ctg389□WAG-96O9  
ctg5009□ctg313□ctg389□WAG-106E10  
ctg5009□ctg313□ctg389□WAG-120O6  
ctg5009□ctg313□ctg389□WAG-128G7  
ctg501□ctg1122□ctg1254□WAG-11H8  
ctg501□ctg1122□ctg1254□WAG-15P5  
ctg501□ctg1122□ctg1254□WAG-71B8  
ctg501□ctg1122□ctg1254□WAG-88E17  
ctg501□ctg1122□ctg1254□WAG-98L21  
ctg5010□□□WAG-122G22  
ctg5010□ctg1907□□WAG-42F19  
ctg5010□ctg1907□□WAG-71E15  
ctg5010□ctg1907□ctg1743□WAG-20M9  
ctg5010□ctg1907□ctg1743□WAG-36J5  
ctg5010□ctg1907□ctg1743□WAG-73B23  
ctg5010□ctg1907□ctg1743□WAG-105E19  
ctg5010□ctg1907□ctg1743□WAG-130D17  
ctg5010□ctg1907□ctg5035□WAG-76O11  
ctg5010□ctg1907□ctg5035□WAG-84E11  
ctg5010□ctg1907□ctg5461□WAG-44O16  
ctg5010□ctg1907□ctg5461□WAG-54H8  
ctg5010□ctg5464□ctg6526□WAG-3A16  
ctg5010□ctg5464□ctg6526□WAG-3O23  
ctg5011□□□WAG-J15  
ctg5011□□□WAG-127G13  
ctg5011□ctg1981□ctg2382□WAG-67P1  
ctg5011□ctg1981□ctg2382□WAG-95F23  
ctg5011□ctg1981□ctg2382□WAG-96L5  
ctg5011□ctg1981□ctg2382□WAG-122O4  
ctg5011□ctg1981□ctg2382□WAG-129H18  
ctg5011□ctg2573□□WAG-125O14  
ctg5011□ctg2573□ctg3221□WAG-24I16  
ctg5011□ctg2573□ctg3221□WAG-32O12  
ctg5011□ctg2573□ctg3221□WAG-93F15  
ctg5011□ctg2573□ctg5268□WAG-1E12  
ctg5011□ctg2573□ctg5268□WAG-123P12  
ctg5011□ctg4335□ctg4519□WAG-1M4  
ctg5011□ctg4335□ctg4519□WAG-90O3  
ctg5012□□□WAG-17B13  
ctg5012□□□WAG-114D10  
ctg5012□ctg6483□□WAG-1N11  
ctg5012□ctg6483□□WAG-8D2  
ctg5013□ctg2041□ctg2476□WAG-42L19  
ctg5013□ctg2041□ctg2476□WAG-56L11  
ctg5013□ctg2041□ctg2476□WAG-82G24  
ctg5013□ctg2041□ctg2476□WAG-114L20  
ctg5013□ctg2041□ctg4919□WAG-18N17  
ctg5013□ctg2041□ctg4919□WAG-112P7  
ctg5014□□□WAG-33H14  
ctg5014□□□WAG-35N8  
ctg5014□ctg46□□WAG-26N11  
ctg5014□ctg46□□WAG-33F7  
ctg5014□ctg46□□WAG-50I17  
ctg5014□ctg46□ctg140□WAG-14L8  
ctg5014□ctg46□ctg140□WAG-16P20

ctg5014□ctg46□ctg140□WAG-23H16  
ctg5014□ctg46□ctg140□WAG-30N12  
ctg5014□ctg46□ctg140□WAG-40O12  
ctg5014□ctg46□ctg140□WAG-49J9  
ctg5014□ctg46□ctg140□WAG-50I8  
ctg5014□ctg46□ctg140□WAG-65F19  
ctg5014□ctg46□ctg140□WAG-72O8  
ctg5014□ctg46□ctg140□WAG-81I15  
ctg5014□ctg46□ctg140□WAG-85I11  
ctg5014□ctg46□ctg140□WAG-85P6  
ctg5014□ctg46□ctg140□WAG-88N22  
ctg5014□ctg46□ctg140□WAG-89N10  
ctg5014□ctg46□ctg140□WAG-89O14  
ctg5014□ctg46□ctg140□WAG-104E13  
ctg5014□ctg46□ctg140□WAG-112L15  
ctg5014□ctg46□ctg140□WAG-116D2  
ctg5014□ctg46□ctg140□WAG-121J3  
ctg5014□ctg46□ctg140□WAG-124F20  
ctg5014□ctg46□ctg140□WAG-128K8  
ctg5014□ctg46□ctg3283□WAG-41M20  
ctg5014□ctg46□ctg3283□WAG-71J19  
ctg5014□ctg46□ctg3283□WAG-104B10  
ctg5014□ctg46□ctg3283□WAG-121P3  
ctg5014□ctg575□□WAG-91D1  
ctg5014□ctg575□□WAG-96B21  
ctg5014□ctg575□ctg760□WAG-19O17  
ctg5014□ctg575□ctg760□WAG-27F21  
ctg5014□ctg575□ctg760□WAG-55F19  
ctg5014□ctg575□ctg760□WAG-119I7  
ctg5014□ctg575□ctg760□WAG-128A13  
ctg5014□ctg575□ctg760□WAG-130I23  
ctg5015□□□WAG-28M17  
ctg5015□ctg135□□WAG-9M6  
ctg5015□ctg135□□WAG-17M3  
ctg5015□ctg135□□WAG-107M24  
ctg5015□ctg135□□WAG-108M3  
ctg5015□ctg135□ctg137□WAG-15M7  
ctg5015□ctg135□ctg137□WAG-41M10  
ctg5015□ctg135□ctg137□WAG-45K15  
ctg5015□ctg135□ctg137□WAG-75E3  
ctg5015□ctg135□ctg137□WAG-96B24  
ctg5015□ctg135□ctg137□WAG-96F19  
ctg5015□ctg135□ctg137□WAG-112A9  
ctg5015□ctg135□ctg137□WAG-118P20  
ctg5015□ctg135□ctg137□WAG-122O12  
ctg5015□ctg135□ctg137□WAG-123A9  
ctg5015□ctg135□ctg4946□WAG-8B18  
ctg5015□ctg135□ctg4946□WAG-57L24  
ctg5015□ctg135□ctg5767□WAG-20A9  
ctg5015□ctg135□ctg5767□WAG-56M19  
ctg5016□□□WAG-35P1  
ctg5016□ctg697□□WAG-30J7  
ctg5016□ctg697□□WAG-43K11  
ctg5016□ctg697□ctg2492□WAG-22L10  
ctg5016□ctg697□ctg2492□WAG-65L4  
ctg5016□ctg697□ctg2492□WAG-82J23

ctg5016□ctg697□ctg840□WAG-19H5  
ctg5016□ctg697□ctg840□WAG-58K12  
ctg5016□ctg697□ctg840□WAG-66B7  
ctg5016□ctg697□ctg840□WAG-67A17  
ctg5016□ctg697□ctg840□WAG-79A18  
ctg5016□ctg697□ctg840□WAG-97I1  
ctg5016□ctg697□ctg840□WAG-114N1  
ctg5016□ctg697□ctg840□WAG-118M13  
ctg5016□ctg697□ctg840□WAG-119A10  
ctg5016□ctg697□ctg840□WAG-119B12  
ctg5016□ctg697□ctg840□WAG-121M18  
ctg5016□ctg697□ctg840□WAG-129E15  
ctg5016□ctg697□ctg840□WAG-129O13  
ctg5017□□□WAG-107E19  
ctg5017□ctg2618□ctg2902□WAG-51F6  
ctg5017□ctg2618□ctg2902□WAG-62C22  
ctg5017□ctg2618□ctg2902□WAG-64O17  
ctg5017□ctg2618□ctg2902□WAG-65I23  
ctg5017□ctg2618□ctg2902□WAG-88J9  
ctg5017□ctg3582□□WAG-9D13  
ctg5017□ctg3582□□WAG-14P11  
ctg5017□ctg3582□□WAG-87D19  
ctg5017□ctg3582□□WAG-106B10  
ctg5018□□□WAG-4N20  
ctg5018□□□WAG-34B14  
ctg5018□□□WAG-36D21  
ctg5018□□□WAG-93I21  
ctg5018□ctg3203□ctg5193□WAG-62I8  
ctg5018□ctg3203□ctg5193□WAG-102F18  
ctg5018□ctg3203□ctg5365□WAG-31B5  
ctg5018□ctg3203□ctg5365□WAG-110L19  
ctg5018□ctg660□□WAG-12P10  
ctg5018□ctg660□□WAG-20O7  
ctg5018□ctg660□□WAG-34J24  
ctg5018□ctg660□□WAG-47C1  
ctg5018□ctg660□□WAG-72G18  
ctg5018□ctg660□□WAG-77F9  
ctg5018□ctg660□□WAG-117F20  
ctg5018□ctg660□□WAG-118I13  
ctg5018□ctg660□□WAG-128E24  
ctg5018□ctg660□ctg1207□WAG-19G10  
ctg5018□ctg660□ctg1207□WAG-25A12  
ctg5018□ctg660□ctg1207□WAG-36O17  
ctg5018□ctg660□ctg1207□WAG-39D1  
ctg5018□ctg660□ctg1207□WAG-41C4  
ctg5018□ctg660□ctg1207□WAG-61L18  
ctg5018□ctg660□ctg1207□WAG-72E17  
ctg5018□ctg660□ctg1207□WAG-72E18  
ctg5018□ctg660□ctg1207□WAG-72F18  
ctg5018□ctg660□ctg1207□WAG-77M9  
ctg5018□ctg660□ctg1207□WAG-103J17  
ctg5018□ctg660□ctg1207□WAG-123M19  
ctg5018□ctg660□ctg1207□WAG-127M19  
ctg5018□ctg660□ctg3815□WAG-25B11  
ctg5018□ctg660□ctg3815□WAG-73J13  
ctg5018□ctg660□ctg3815□WAG-78C2

ctg5018□ctg660□ctg3815□WAG-122H20  
ctg5018□ctg660□ctg6209□WAG-15A16  
ctg5018□ctg660□ctg6209□WAG-89P19  
ctg5019□□□WAG-8K12  
ctg5019□ctg3421□ctg3522□WAG-13F2  
ctg5019□ctg3421□ctg3522□WAG-98F7  
ctg5019□ctg3421□ctg3522□WAG-108H19  
ctg5019□ctg3421□ctg3522□WAG-122K7  
ctg5019□ctg51□□WAG-22P22  
ctg5019□ctg51□□WAG-48N22  
ctg5019□ctg51□□WAG-87K13  
ctg5019□ctg51□ctg2251□WAG-50F20  
ctg5019□ctg51□ctg2251□WAG-53E5  
ctg5019□ctg51□ctg2251□WAG-128L24  
ctg5019□ctg51□ctg82□WAG-3A9  
ctg5019□ctg51□ctg82□WAG-3C11  
ctg5019□ctg51□ctg82□WAG-4K15  
ctg5019□ctg51□ctg82□WAG-26K7  
ctg5019□ctg51□ctg82□WAG-34O5  
ctg5019□ctg51□ctg82□WAG-37J8  
ctg5019□ctg51□ctg82□WAG-44B12  
ctg5019□ctg51□ctg82□WAG-45C16  
ctg5019□ctg51□ctg82□WAG-46J8  
ctg5019□ctg51□ctg82□WAG-47C23  
ctg5019□ctg51□ctg82□WAG-49L8  
ctg5019□ctg51□ctg82□WAG-49O11  
ctg5019□ctg51□ctg82□WAG-51E8  
ctg5019□ctg51□ctg82□WAG-53P19  
ctg5019□ctg51□ctg82□WAG-55O18  
ctg5019□ctg51□ctg82□WAG-56C9  
ctg5019□ctg51□ctg82□WAG-59K11  
ctg5019□ctg51□ctg82□WAG-63O7  
ctg5019□ctg51□ctg82□WAG-66C3  
ctg5019□ctg51□ctg82□WAG-70A19  
ctg5019□ctg51□ctg82□WAG-77C24  
ctg5019□ctg51□ctg82□WAG-81O10  
ctg5019□ctg51□ctg82□WAG-97C16  
ctg5019□ctg51□ctg82□WAG-104O6  
ctg5019□ctg51□ctg82□WAG-105I12  
ctg5019□ctg51□ctg82□WAG-106F14  
ctg5019□ctg51□ctg82□WAG-126C23  
ctg5019□ctg51□ctg82□WAG-127J16  
ctg5019□ctg51□ctg82□WAG-129F3  
ctg502□□□WAG-8L18  
ctg502□□□WAG-83A20  
ctg502□□□WAG-97F14  
ctg502□ctg1324□ctg1540□WAG-1L6  
ctg502□ctg1324□ctg1540□WAG-54C18  
ctg502□ctg1324□ctg1540□WAG-86C10  
ctg502□ctg1324□ctg1540□WAG-91A8  
ctg502□ctg1324□ctg1540□WAG-114D6  
ctg502□ctg1324□ctg1540□WAG-118F16  
ctg502□ctg5178□ctg5878□WAG-72E13  
ctg502□ctg5178□ctg5878□WAG-72F14  
ctg502□ctg5248□ctg6040□WAG-25E22  
ctg502□ctg5248□ctg6040□WAG-89O18

ctg5020□□□WAG-117G24  
ctg5020□ctg2060□□WAG-7O4  
ctg5020□ctg2060□ctg2507□WAG-24K18  
ctg5020□ctg2060□ctg2507□WAG-43F10  
ctg5020□ctg2060□ctg2507□WAG-82I1  
ctg5020□ctg2060□ctg2507□WAG-95J17  
ctg5020□ctg2060□ctg6887□WAG-33N14  
ctg5020□ctg2060□ctg6887□WAG-117O13  
ctg5021□□□WAG-81O9  
ctg5021□ctg2369□□WAG-72C22  
ctg5021□ctg2369□□WAG-123B5  
ctg5021□ctg2369□ctg2950□WAG-81P9  
ctg5021□ctg2369□ctg2950□WAG-129B13  
ctg5022□ctg4024□ctg5799□WAG-63N19  
ctg5022□ctg4024□ctg5799□WAG-78G15  
ctg5022□ctg4024□ctg6241□WAG-62G4  
ctg5022□ctg4024□ctg6241□WAG-122C1  
ctg5023□ctg1810□ctg1634□WAG-10N22  
ctg5023□ctg1810□ctg1634□WAG-103G21  
ctg5023□ctg1810□ctg1634□WAG-106C13  
ctg5023□ctg1810□ctg1634□WAG-112G15  
ctg5023□ctg1810□ctg1634□WAG-129O20  
ctg5023□ctg1810□ctg2453□WAG-74L2  
ctg5023□ctg1810□ctg2453□WAG-98N1  
ctg5023□ctg1810□ctg2453□WAG-129L14  
ctg5023□ctg1810□ctg6255□WAG-85B5  
ctg5023□ctg1810□ctg6255□WAG-102P20  
ctg5024□ctg859□□WAG-77H22  
ctg5024□ctg859□ctg1484□WAG-9P8  
ctg5024□ctg859□ctg1484□WAG-28E10  
ctg5024□ctg859□ctg1484□WAG-39F22  
ctg5024□ctg859□ctg1484□WAG-49H12  
ctg5024□ctg859□ctg1484□WAG-78D21  
ctg5024□ctg859□ctg1484□WAG-96L8  
ctg5024□ctg859□ctg1484□WAG-102J14  
ctg5024□ctg859□ctg1484□WAG-127H15  
ctg5025□□□WAG-30P24  
ctg5025□□□WAG-39K14  
ctg5025□ctg6598□ctg59□WAG-9B20  
ctg5025□ctg6598□ctg59□WAG-19J14  
ctg5025□ctg6598□ctg59□WAG-26C4  
ctg5025□ctg6598□ctg59□WAG-28H13  
ctg5025□ctg6598□ctg59□WAG-49F12  
ctg5025□ctg6598□ctg59□WAG-59H11  
ctg5025□ctg6598□ctg59□WAG-66G3  
ctg5025□ctg6598□ctg59□WAG-99E1  
ctg5025□ctg6598□ctg59□WAG-112E5  
ctg5025□ctg6598□ctg59□WAG-114J17  
ctg5025□ctg6598□ctg59□WAG-124N7  
ctg5025□ctg6598□ctg59□WAG-125N23  
ctg5025□ctg6598□ctg59□WAG-126D18  
ctg5025□ctg80□□WAG-16D22  
ctg5025□ctg80□□WAG-43A16  
ctg5025□ctg80□ctg1210□WAG-8B15  
ctg5025□ctg80□ctg1210□WAG-34M9  
ctg5025□ctg80□ctg1210□WAG-70I17

ctg5025□ctg80□ctg1210□WAG-85E18  
ctg5025□ctg80□ctg1210□WAG-92F18  
ctg5025□ctg80□ctg1210□WAG-110P18  
ctg5025□ctg80□ctg1210□WAG-111N11  
ctg5025□ctg80□ctg1210□WAG-122E22  
ctg5025□ctg80□ctg1210□WAG-127E13  
ctg5025□ctg80□ctg453□WAG-34D13  
ctg5025□ctg80□ctg453□WAG-42K19  
ctg5025□ctg80□ctg453□WAG-42L17  
ctg5025□ctg80□ctg453□WAG-48C10  
ctg5025□ctg80□ctg453□WAG-49L1  
ctg5025□ctg80□ctg453□WAG-52M23  
ctg5025□ctg80□ctg453□WAG-65G3  
ctg5025□ctg80□ctg453□WAG-73J5  
ctg5025□ctg80□ctg453□WAG-75A5  
ctg5025□ctg80□ctg453□WAG-78L14  
ctg5025□ctg80□ctg453□WAG-80J9  
ctg5025□ctg80□ctg453□WAG-80J22  
ctg5025□ctg80□ctg453□WAG-90P9  
ctg5025□ctg80□ctg453□WAG-106A24  
ctg5025□ctg80□ctg453□WAG-117K4  
ctg5025□ctg80□ctg453□WAG-119A8  
ctg5025□ctg80□ctg453□WAG-120O24  
ctg5025□ctg80□ctg453□WAG-121L1  
ctg5025□ctg80□ctg453□WAG-123O6  
ctg5025□ctg80□ctg453□WAG-127J15  
ctg5025□ctg80□ctg453□WAG-129M13  
ctg5026□□□WAG-23L18  
ctg5026□□□WAG-60E20  
ctg5026□□□WAG-78K23  
ctg5026□ctg1171□□WAG-125D15  
ctg5026□ctg1171□ctg1719□WAG-34J15  
ctg5026□ctg1171□ctg1719□WAG-63C23  
ctg5026□ctg1171□ctg1719□WAG-85H3  
ctg5026□ctg1171□ctg1719□WAG-129A20  
ctg5026□ctg1171□ctg6079□WAG-34K19  
ctg5026□ctg1171□ctg6079□WAG-57K15  
ctg5026□ctg2029□□WAG-47K20  
ctg5026□ctg2029□□WAG-98C1  
ctg5026□ctg2029□ctg2575□WAG-26H17  
ctg5026□ctg2029□ctg2575□WAG-26P14  
ctg5026□ctg2029□ctg2575□WAG-33I6  
ctg5026□ctg2029□ctg2575□WAG-66J17  
ctg5026□ctg2029□ctg2575□WAG-68A1  
ctg5026□ctg2029□ctg2575□WAG-87C20  
ctg5026□ctg2029□ctg2575□WAG-115D13  
ctg5026□ctg2029□ctg2575□WAG-122A7  
ctg5026□ctg2029□ctg2575□WAG-125F15  
ctg5027□□□WAG-2P19  
ctg5027□□□WAG-16H19  
ctg5027□□□WAG-28O7  
ctg5027□□□WAG-37E24  
ctg5027□□□WAG-74A4  
ctg5027□□□WAG-74K5  
ctg5027□□□WAG-77A11  
ctg5027□□□WAG-80H3



ctg5027□□□WAG-87E1  
ctg5027□□□WAG-92C5  
ctg5027□□□WAG-100E18  
ctg5027□ctg107□□WAG-24E18  
ctg5027□ctg107□ctg120□WAG-22B9  
ctg5027□ctg107□ctg120□WAG-34L7  
ctg5027□ctg107□ctg120□WAG-34M14  
ctg5027□ctg107□ctg120□WAG-35E13  
ctg5027□ctg107□ctg120□WAG-48G7  
ctg5027□ctg107□ctg120□WAG-53O15  
ctg5027□ctg107□ctg120□WAG-65D7  
ctg5027□ctg107□ctg120□WAG-66J10  
ctg5027□ctg107□ctg120□WAG-84J17  
ctg5027□ctg107□ctg120□WAG-93L3  
ctg5027□ctg107□ctg120□WAG-95A10  
ctg5027□ctg107□ctg120□WAG-97E11  
ctg5027□ctg107□ctg120□WAG-100O6  
ctg5027□ctg107□ctg120□WAG-102D1  
ctg5027□ctg107□ctg120□WAG-107H7  
ctg5027□ctg107□ctg120□WAG-110D20  
ctg5027□ctg107□ctg120□WAG-118J6  
ctg5027□ctg107□ctg120□WAG-121E13  
ctg5027□ctg107□ctg120□WAG-124A17  
ctg5027□ctg107□ctg120□WAG-124I1  
ctg5027□ctg107□ctg120□WAG-128G4  
ctg5027□ctg2548□□WAG-58L8  
ctg5027□ctg2548□□WAG-109C2  
ctg5027□ctg2548□ctg4996□WAG-46D18  
ctg5027□ctg2548□ctg4996□WAG-96P23  
ctg5027□ctg2548□ctg5145□WAG-51I13  
ctg5027□ctg2548□ctg5145□WAG-80D18  
ctg5027□ctg2548□ctg5761□WAG-48E12  
ctg5027□ctg2548□ctg5761□WAG-108N9  
ctg5027□ctg2548□ctg6267□WAG-26D24  
ctg5027□ctg2548□ctg6267□WAG-79J3  
ctg5027□ctg6608□ctg6973□WAG-61B16  
ctg5027□ctg6608□ctg6973□WAG-121E11  
ctg5028□ctg1706□□WAG-94G15  
ctg5028□ctg1706□ctg1989□WAG-7P16  
ctg5028□ctg1706□ctg1989□WAG-11L2  
ctg5028□ctg1706□ctg1989□WAG-62N10  
ctg5028□ctg1706□ctg1989□WAG-110K16  
ctg5028□ctg1706□ctg5233□WAG-8A14  
ctg5028□ctg1706□ctg5233□WAG-66M24  
ctg5029□ctg636□□WAG-67I23  
ctg5029□ctg636□ctg2395□WAG-59G9  
ctg5029□ctg636□ctg2395□WAG-79J1  
ctg5029□ctg636□ctg2395□WAG-99F10  
ctg5029□ctg636□ctg2395□WAG-120A18  
ctg5029□ctg636□ctg5793□WAG-58A23  
ctg5029□ctg636□ctg5793□WAG-91A19  
ctg5029□ctg636□ctg662□WAG-9N12  
ctg5029□ctg636□ctg662□WAG-22H21  
ctg5029□ctg636□ctg662□WAG-38M14  
ctg5029□ctg636□ctg662□WAG-43L5  
ctg5029□ctg636□ctg662□WAG-52C6

ctg5029□ctg636□ctg662□WAG-57F23  
ctg5029□ctg636□ctg662□WAG-57H22  
ctg5029□ctg636□ctg662□WAG-75H20  
ctg5029□ctg636□ctg662□WAG-99K16  
ctg5029□ctg636□ctg662□WAG-101H14  
ctg5029□ctg636□ctg662□WAG-109K21  
ctg5029□ctg636□ctg662□WAG-110J16  
ctg503□ctg1363□□WAG-32N3  
ctg503□ctg1363□□WAG-77P2  
ctg503□ctg1363□□WAG-121G3  
ctg503□ctg1363□□WAG-127L15  
ctg503□ctg1363□ctg1588□WAG-30I8  
ctg503□ctg1363□ctg1588□WAG-51M14  
ctg503□ctg1363□ctg1588□WAG-57O23  
ctg503□ctg1363□ctg1588□WAG-72C7  
ctg503□ctg1363□ctg1588□WAG-78C16  
ctg503□ctg1363□ctg1588□WAG-118D6  
ctg503□ctg1363□ctg5063□WAG-1H14  
ctg503□ctg1363□ctg5063□WAG-65K10  
ctg503□ctg6102□□WAG-30F5  
ctg503□ctg6102□□WAG-94O12  
ctg5030□ctg2761□ctg2959□WAG-93G12  
ctg5030□ctg2761□ctg2959□WAG-107F23  
ctg5030□ctg2761□ctg2959□WAG-120B21  
ctg5030□ctg2761□ctg2959□WAG-129P18  
ctg5030□ctg3894□ctg4173□WAG-69F2  
ctg5030□ctg3894□ctg4173□WAG-129M16  
ctg5031□□□WAG-61K19  
ctg5031□ctg55□□WAG-9N14  
ctg5031□ctg55□□WAG-27G19  
ctg5031□ctg55□□WAG-61A11  
ctg5031□ctg55□□WAG-81H13  
ctg5031□ctg55□□WAG-123O15  
ctg5031□ctg55□ctg1643□WAG-51O24  
ctg5031□ctg55□ctg1643□WAG-71M8  
ctg5031□ctg55□ctg1643□WAG-73N23  
ctg5031□ctg55□ctg1643□WAG-86P4  
ctg5031□ctg55□ctg1643□WAG-99H11  
ctg5031□ctg55□ctg1643□WAG-103K12  
ctg5031□ctg55□ctg1643□WAG-125B4  
ctg5031□ctg55□ctg559□WAG-16H9  
ctg5031□ctg55□ctg559□WAG-23E8  
ctg5031□ctg55□ctg559□WAG-83J2  
ctg5031□ctg55□ctg559□WAG-86B6  
ctg5031□ctg55□ctg559□WAG-89A15  
ctg5031□ctg55□ctg559□WAG-92O21  
ctg5031□ctg55□ctg559□WAG-106K22  
ctg5031□ctg55□ctg559□WAG-111A23  
ctg5031□ctg6597□□WAG-31H14  
ctg5031□ctg6597□□WAG-82P9  
ctg5031□ctg6597□□WAG-91B2  
ctg5031□ctg6597□ctg6976□WAG-24K14  
ctg5031□ctg6597□ctg6976□WAG-46N3  
ctg5031□ctg6597□ctg6976□WAG-82P16  
ctg5031□ctg6597□ctg6976□WAG-90O21  
ctg5031□ctg6597□ctg6976□WAG-102N4

ctg5031□ctg6597□ctg6976□WAG-128P9  
ctg5031□ctg6597□ctg6977□WAG-44J4  
ctg5031□ctg6597□ctg6977□WAG-95G22  
ctg5031□ctg6597□ctg6977□WAG-97H14  
ctg5031□ctg6597□ctg84□WAG-3A8  
ctg5031□ctg6597□ctg84□WAG-3N10  
ctg5031□ctg6597□ctg84□WAG-7J2  
ctg5031□ctg6597□ctg84□WAG-12G17  
ctg5031□ctg6597□ctg84□WAG-15G1  
ctg5031□ctg6597□ctg84□WAG-16O12  
ctg5031□ctg6597□ctg84□WAG-25C9  
ctg5031□ctg6597□ctg84□WAG-32L14  
ctg5031□ctg6597□ctg84□WAG-36F22  
ctg5031□ctg6597□ctg84□WAG-38N16  
ctg5031□ctg6597□ctg84□WAG-43L15  
ctg5031□ctg6597□ctg84□WAG-48I8  
ctg5031□ctg6597□ctg84□WAG-51J14  
ctg5031□ctg6597□ctg84□WAG-62C14  
ctg5031□ctg6597□ctg84□WAG-63J3  
ctg5031□ctg6597□ctg84□WAG-68M8  
ctg5031□ctg6597□ctg84□WAG-71P8  
ctg5031□ctg6597□ctg84□WAG-73J14  
ctg5031□ctg6597□ctg84□WAG-80N12  
ctg5031□ctg6597□ctg84□WAG-84C3  
ctg5031□ctg6597□ctg84□WAG-85D2  
ctg5031□ctg6597□ctg84□WAG-87K9  
ctg5031□ctg6597□ctg84□WAG-89C11  
ctg5031□ctg6597□ctg84□WAG-99F7  
ctg5031□ctg6597□ctg84□WAG-101G18  
ctg5031□ctg6597□ctg84□WAG-104E18  
ctg5031□ctg6597□ctg84□WAG-109M6  
ctg5031□ctg6597□ctg84□WAG-124H3  
ctg5032□ctg1119□ctg1688□WAG-23M2  
ctg5032□ctg1119□ctg1688□WAG-50B14  
ctg5032□ctg1119□ctg1688□WAG-80I13  
ctg5032□ctg1119□ctg1688□WAG-90C14  
ctg5032□ctg1119□ctg5072□WAG-44P19  
ctg5032□ctg1119□ctg5072□WAG-81G5  
ctg5032□ctg1119□ctg954□WAG-10P11  
ctg5032□ctg1119□ctg954□WAG-15D13  
ctg5032□ctg1119□ctg954□WAG-66M23  
ctg5032□ctg1119□ctg954□WAG-97O6  
ctg5032□ctg1119□ctg954□WAG-109B14  
ctg5032□ctg1119□ctg954□WAG-121G24  
ctg5032□ctg1119□ctg954□WAG-125O21  
ctg5032□ctg1119□ctg954□WAG-128N1  
ctg5032□ctg5632□□WAG-125A20  
ctg5032□ctg5632□□WAG-127H1  
ctg5033□□□WAG-8F13  
ctg5033□□□WAG-42O18  
ctg5033□ctg2160□ctg2035□WAG-19C2  
ctg5033□ctg2160□ctg2035□WAG-88F21  
ctg5033□ctg2160□ctg2035□WAG-91O15  
ctg5033□ctg2160□ctg2035□WAG-101P16  
ctg5033□ctg324□ctg244□WAG-40K20  
ctg5033□ctg324□ctg244□WAG-94C11

ctg5033□ctg324□ctg244□WAG-95A19  
ctg5033□ctg324□ctg244□WAG-103M16  
ctg5033□ctg324□ctg244□WAG-110I15  
ctg5033□ctg324□ctg244□WAG-130E5  
ctg5033□ctg4527□□WAG-30F24  
ctg5033□ctg4527□□WAG-31O10  
ctg5033□ctg4527□□WAG-85J11  
ctg5034□ctg6276□□WAG-95P23  
ctg5034□ctg6276□□WAG-128C5  
ctg5035□ctg4388□ctg4565□WAG-47N22  
ctg5035□ctg4388□ctg4565□WAG-53F24  
ctg5035□ctg616□□WAG-38A10  
ctg5035□ctg616□ctg512□WAG-5I11  
ctg5035□ctg616□ctg512□WAG-5O5  
ctg5035□ctg616□ctg512□WAG-5P11  
ctg5035□ctg616□ctg512□WAG-18I3  
ctg5035□ctg616□ctg512□WAG-35C17  
ctg5035□ctg616□ctg512□WAG-62M5  
ctg5035□ctg616□ctg512□WAG-70N14  
ctg5035□ctg616□ctg512□WAG-77J12  
ctg5035□ctg616□ctg512□WAG-81N11  
ctg5035□ctg616□ctg512□WAG-109K23  
ctg5035□ctg616□ctg512□WAG-128B22  
ctg5035□ctg616□ctg512□WAG-130I1  
ctg5036□□□WAG-128M20  
ctg5036□ctg162□ctg170□WAG-22G8  
ctg5036□ctg162□ctg170□WAG-37H20  
ctg5036□ctg162□ctg170□WAG-43A4  
ctg5036□ctg162□ctg170□WAG-68K23  
ctg5036□ctg162□ctg170□WAG-80I8  
ctg5036□ctg162□ctg170□WAG-86D20  
ctg5036□ctg162□ctg170□WAG-90L4  
ctg5036□ctg162□ctg170□WAG-114K5  
ctg5036□ctg162□ctg170□WAG-117H4  
ctg5037□ctg1633□□WAG-32B10  
ctg5037□ctg1633□□WAG-103H21  
ctg5037□ctg1633□ctg1967□WAG-10P17  
ctg5037□ctg1633□ctg1967□WAG-65B17  
ctg5037□ctg1633□ctg1967□WAG-129I6  
ctg5038□□□WAG-35L20  
ctg5038□□□WAG-43K7  
ctg5038□□□WAG-52A3  
ctg5038□□□WAG-55I7  
ctg5038□□□WAG-55P20  
ctg5038□□□WAG-104J7  
ctg5038□□□WAG-114H6  
ctg5038□ctg1796□□WAG-13O2  
ctg5038□ctg1796□ctg2049□WAG-10C11  
ctg5038□ctg1796□ctg2049□WAG-87A16  
ctg5038□ctg1796□ctg2049□WAG-90O5  
ctg5038□ctg1796□ctg2049□WAG-105I6  
ctg5038□ctg1796□ctg2049□WAG-118M20  
ctg5038□ctg1796□ctg2049□WAG-120A3  
ctg5038□ctg206□□WAG-29D3  
ctg5038□ctg206□ctg268□WAG-28P14  
ctg5038□ctg206□ctg268□WAG-30O22

ctg5038□ctg206□ctg268□WAG-47G17  
ctg5038□ctg206□ctg268□WAG-49N22  
ctg5038□ctg206□ctg268□WAG-52K15  
ctg5038□ctg206□ctg268□WAG-62D23  
ctg5038□ctg206□ctg268□WAG-63B4  
ctg5038□ctg206□ctg268□WAG-63C19  
ctg5038□ctg206□ctg268□WAG-79O21  
ctg5038□ctg206□ctg268□WAG-89D10  
ctg5038□ctg206□ctg268□WAG-97E17  
ctg5038□ctg206□ctg268□WAG-99G2  
ctg5038□ctg206□ctg268□WAG-107L5  
ctg5038□ctg206□ctg268□WAG-113M18  
ctg5038□ctg206□ctg268□WAG-116M16  
ctg5038□ctg206□ctg268□WAG-126G19  
ctg5038□ctg206□ctg943□WAG-24E2  
ctg5038□ctg206□ctg943□WAG-42K21  
ctg5038□ctg206□ctg943□WAG-89D14  
ctg5038□ctg206□ctg943□WAG-115O5  
ctg5038□ctg206□ctg943□WAG-116C4  
ctg5038□ctg206□ctg943□WAG-130K24  
ctg5038□ctg5762□□WAG-79F3  
ctg5038□ctg5762□□WAG-118J7  
ctg5039□□□WAG-2C2  
ctg5039□□□WAG-112P1  
ctg5039□ctg134□□WAG-47I17  
ctg5039□ctg134□□WAG-65O6  
ctg5039□ctg134□ctg1058□WAG-22O9  
ctg5039□ctg134□ctg1058□WAG-32P18  
ctg5039□ctg134□ctg1058□WAG-40L7  
ctg5039□ctg134□ctg1058□WAG-43N21  
ctg5039□ctg134□ctg1058□WAG-121A22  
ctg5039□ctg134□ctg136□WAG-2B19  
ctg5039□ctg134□ctg136□WAG-22M21  
ctg5039□ctg134□ctg136□WAG-44N14  
ctg5039□ctg134□ctg136□WAG-49C13  
ctg5039□ctg134□ctg136□WAG-54C12  
ctg5039□ctg134□ctg136□WAG-90J6  
ctg5039□ctg134□ctg136□WAG-117D1  
ctg5039□ctg134□ctg136□WAG-122O7  
ctg5039□ctg134□ctg2051□WAG-66N2  
ctg5039□ctg134□ctg2051□WAG-66O2  
ctg5039□ctg134□ctg2051□WAG-107H24  
ctg504□ctg1126□□WAG-115N19  
ctg504□ctg1126□ctg1194□WAG-3C6  
ctg504□ctg1126□ctg1194□WAG-3G4  
ctg504□ctg1126□ctg1194□WAG-8J22  
ctg504□ctg1126□ctg1194□WAG-24H1  
ctg504□ctg1126□ctg1194□WAG-54J3  
ctg504□ctg1126□ctg1194□WAG-110A17  
ctg504□ctg1126□ctg6446□WAG-60B20  
ctg504□ctg1126□ctg6446□WAG-119I3  
ctg5040□□□WAG-27G13  
ctg5040□□□WAG-54D1  
ctg5040□ctg1□□WAG-39M22  
ctg5040□ctg1□□WAG-57P2  
ctg5040□ctg1□□WAG-64A3

ctg5040□ctg1□□WAG-77O23  
ctg5040□ctg1□□WAG-87O10  
ctg5040□ctg1□ctg1□WAG-3C22  
ctg5040□ctg1□ctg1□WAG-6D16  
ctg5040□ctg1□ctg1□WAG-7M20  
ctg5040□ctg1□ctg1□WAG-9D18  
ctg5040□ctg1□ctg1□WAG-9J17  
ctg5040□ctg1□ctg1□WAG-19C12  
ctg5040□ctg1□ctg1□WAG-20I20  
ctg5040□ctg1□ctg1□WAG-26I15  
ctg5040□ctg1□ctg1□WAG-26P1  
ctg5040□ctg1□ctg1□WAG-49M9  
ctg5040□ctg1□ctg1□WAG-53F4  
ctg5040□ctg1□ctg1□WAG-62O7  
ctg5040□ctg1□ctg1□WAG-64E16  
ctg5040□ctg1□ctg1□WAG-65F23  
ctg5040□ctg1□ctg1□WAG-76I8  
ctg5040□ctg1□ctg1□WAG-80H15  
ctg5040□ctg1□ctg1□WAG-85A19  
ctg5040□ctg1□ctg1□WAG-85K21  
ctg5040□ctg1□ctg1□WAG-86C8  
ctg5040□ctg1□ctg1□WAG-87O12  
ctg5040□ctg1□ctg1□WAG-93N18  
ctg5040□ctg1□ctg1□WAG-96M2  
ctg5040□ctg1□ctg1□WAG-101M7  
ctg5040□ctg1□ctg1□WAG-106A8  
ctg5040□ctg1□ctg1□WAG-115H20  
ctg5040□ctg1□ctg1□WAG-115I22  
ctg5040□ctg1□ctg183□WAG-29A23  
ctg5040□ctg1□ctg183□WAG-38P2  
ctg5040□ctg1□ctg183□WAG-45J19  
ctg5040□ctg1□ctg183□WAG-49M3  
ctg5040□ctg1□ctg183□WAG-53O13  
ctg5040□ctg1□ctg183□WAG-55D18  
ctg5040□ctg1□ctg183□WAG-66C11  
ctg5040□ctg1□ctg183□WAG-67N1  
ctg5040□ctg1□ctg183□WAG-86N12  
ctg5040□ctg1□ctg183□WAG-87I12  
ctg5040□ctg1□ctg183□WAG-94J24  
ctg5040□ctg1□ctg183□WAG-116L2  
ctg5040□ctg1□ctg183□WAG-119B13  
ctg5040□ctg1□ctg183□WAG-123J13  
ctg5040□ctg1□ctg183□WAG-125H23  
ctg5040□ctg1□ctg183□WAG-130F20  
ctg5040□ctg1□ctg350□WAG-9E3  
ctg5040□ctg1□ctg350□WAG-34I13  
ctg5040□ctg1□ctg350□WAG-68O3  
ctg5040□ctg1□ctg350□WAG-83J3  
ctg5040□ctg1□ctg350□WAG-84J23  
ctg5040□ctg1□ctg350□WAG-90A12  
ctg5040□ctg1□ctg350□WAG-105K11  
ctg5040□ctg1□ctg350□WAG-106P17  
ctg5040□ctg1□ctg350□WAG-109P6  
ctg5040□ctg1□ctg350□WAG-114E8  
ctg5040□ctg1□ctg377□WAG-1G17  
ctg5040□ctg1□ctg377□WAG-5I18

ctg5040□ctg1□ctg377□WAG-18N20  
ctg5040□ctg1□ctg377□WAG-22N6  
ctg5040□ctg1□ctg377□WAG-23F20  
ctg5040□ctg1□ctg377□WAG-31H9  
ctg5040□ctg1□ctg377□WAG-33O12  
ctg5040□ctg1□ctg377□WAG-52N18  
ctg5040□ctg1□ctg377□WAG-61N23  
ctg5040□ctg1□ctg377□WAG-74A2  
ctg5040□ctg1□ctg377□WAG-74G10  
ctg5040□ctg1□ctg377□WAG-74L8  
ctg5040□ctg1□ctg377□WAG-75C5  
ctg5040□ctg1□ctg377□WAG-83M3  
ctg5040□ctg1□ctg377□WAG-87A3  
ctg5040□ctg1□ctg377□WAG-92C12  
ctg5040□ctg1□ctg377□WAG-94F23  
ctg5040□ctg1□ctg377□WAG-95D16  
ctg5040□ctg1□ctg377□WAG-96P3  
ctg5040□ctg1□ctg377□WAG-121C17  
ctg5040□ctg1□ctg377□WAG-123J16  
ctg5040□ctg1□ctg377□WAG-125O8  
ctg5040□ctg1□ctg4618□WAG-48L16  
ctg5040□ctg1□ctg4618□WAG-100F23  
ctg5041□□□WAG-111C14  
ctg5041□□□WAG-118H13  
ctg5041□ctg1885□ctg2325□WAG-24D1  
ctg5041□ctg1885□ctg2325□WAG-42L5  
ctg5041□ctg1885□ctg2325□WAG-56F5  
ctg5041□ctg1885□ctg2325□WAG-124J23  
ctg5041□ctg1885□ctg2745□WAG-26K4  
ctg5041□ctg1885□ctg2745□WAG-58N9  
ctg5041□ctg1885□ctg2745□WAG-91G10  
ctg5042□□□WAG-54P17  
ctg5042□ctg2842□□WAG-11B2  
ctg5042□ctg2842□□WAG-71L1  
ctg5042□ctg2842□□WAG-80P19  
ctg5042□ctg2842□□WAG-111F4  
ctg5042□ctg2842□□WAG-113L20  
ctg5043□ctg103□□WAG-9D11  
ctg5043□ctg103□□WAG-35B20  
ctg5043□ctg103□ctg118□WAG-17F3  
ctg5043□ctg103□ctg118□WAG-38D12  
ctg5043□ctg103□ctg118□WAG-54G4  
ctg5043□ctg103□ctg118□WAG-61E7  
ctg5043□ctg103□ctg118□WAG-68A2  
ctg5043□ctg103□ctg118□WAG-72B17  
ctg5043□ctg103□ctg118□WAG-73A16  
ctg5043□ctg103□ctg118□WAG-79P15  
ctg5043□ctg103□ctg118□WAG-80A14  
ctg5043□ctg103□ctg118□WAG-102C12  
ctg5043□ctg103□ctg118□WAG-111H15  
ctg5043□ctg103□ctg118□WAG-128A12  
ctg5043□ctg103□ctg118□WAG-129C22  
ctg5044□ctg2497□ctg2424□WAG-46D9  
ctg5044□ctg2497□ctg2424□WAG-53H12  
ctg5044□ctg2497□ctg2424□WAG-101A14  
ctg5045□□□WAG-33M19

ctg5045□ctg2850□□WAG-5C14  
ctg5045□ctg2850□ctg3592□WAG-15D4  
ctg5045□ctg2850□ctg3592□WAG-42K3  
ctg5045□ctg2850□ctg3592□WAG-83D8  
ctg5045□ctg2850□ctg3592□WAG-85L24  
ctg5045□ctg4348□□WAG-47J24  
ctg5045□ctg4348□□WAG-89I4  
ctg5045□ctg4348□ctg6462□WAG-80N21  
ctg5045□ctg4348□ctg6462□WAG-91K4  
ctg5046□ctg2947□□WAG-12I4  
ctg5046□ctg2947□□WAG-18E20  
ctg5046□ctg2947□□WAG-27H22  
ctg5046□ctg2947□ctg4272□WAG-15L19  
ctg5046□ctg2947□ctg4272□WAG-97I2  
ctg5046□ctg2947□ctg4272□WAG-123L9  
ctg5047□□□WAG-6K14  
ctg5047□□□WAG-80G11  
ctg5047□□□WAG-127B23  
ctg5047□ctg2990□□WAG-84I8  
ctg5047□ctg2990□ctg3890□WAG-31C6  
ctg5047□ctg2990□ctg3890□WAG-100H13  
ctg5047□ctg2990□ctg3890□WAG-112C5  
ctg5047□ctg2990□ctg5107□WAG-31N9  
ctg5047□ctg2990□ctg5107□WAG-98N11  
ctg5048□□□WAG-37B1  
ctg5048□□□WAG-71G24  
ctg5048□ctg6089□□WAG-92C22  
ctg5048□ctg6089□□WAG-109D14  
ctg5049□ctg1968□ctg1816□WAG-69N5  
ctg5049□ctg1968□ctg1816□WAG-70E6  
ctg5049□ctg1968□ctg1816□WAG-115C9  
ctg5049□ctg1968□ctg1816□WAG-129E12  
ctg505□ctg1128□□WAG-109O13  
ctg505□ctg1128□ctg1238□WAG-1J24  
ctg505□ctg1128□ctg1238□WAG-53B11  
ctg505□ctg1128□ctg1238□WAG-60P13  
ctg505□ctg1128□ctg1238□WAG-87A24  
ctg505□ctg1128□ctg1238□WAG-103P16  
ctg505□ctg1128□ctg4258□WAG-100N18  
ctg505□ctg1128□ctg4258□WAG-126M11  
ctg505□ctg6446□□WAG-8A6  
ctg505□ctg6446□□WAG-20P17  
ctg505□ctg6493□□WAG-6O19  
ctg505□ctg6493□□WAG-46J22  
ctg5050□ctg1345□ctg1188□WAG-9B19  
ctg5050□ctg1345□ctg1188□WAG-25D7  
ctg5050□ctg1345□ctg1188□WAG-35O9  
ctg5050□ctg1345□ctg1188□WAG-65B18  
ctg5050□ctg1345□ctg1188□WAG-77M4  
ctg5051□ctg529□ctg563□WAG-85G15  
ctg5051□ctg529□ctg563□WAG-91G2  
ctg5051□ctg529□ctg563□WAG-91M2  
ctg5051□ctg529□ctg563□WAG-93I11  
ctg5051□ctg529□ctg815□WAG-36I7  
ctg5051□ctg529□ctg815□WAG-63J17  
ctg5051□ctg529□ctg815□WAG-63O11



ctg5051□ctg529□ctg815□WAG-95G17  
ctg5051□ctg529□ctg815□WAG-121L14  
ctg5051□ctg529□ctg815□WAG-125I23  
ctg5052□□□WAG-38G9  
ctg5052□□□WAG-101J20  
ctg5052□ctg1278□□WAG-4O9  
ctg5052□ctg1278□□WAG-16B24  
ctg5052□ctg1278□□WAG-22A21  
ctg5052□ctg1278□□WAG-25H12  
ctg5052□ctg1278□□WAG-57A22  
ctg5052□ctg1278□□WAG-74D9  
ctg5052□ctg1278□□WAG-96N9  
ctg5052□ctg1278□□WAG-99A16  
ctg5052□ctg1278□□WAG-109E12  
ctg5052□ctg1278□□WAG-123K7  
ctg5052□ctg1278□□WAG-127B5  
ctg5052□ctg1278□□WAG-130D18  
ctg5052□ctg1278□ctg1124□WAG-31H15  
ctg5052□ctg1278□ctg1124□WAG-36E6  
ctg5052□ctg1278□ctg1124□WAG-38L7  
ctg5052□ctg1278□ctg1124□WAG-104I24  
ctg5052□ctg1278□ctg1124□WAG-104K20  
ctg5052□ctg1278□ctg1124□WAG-106I4  
ctg5052□ctg1278□ctg4429□WAG-1A14  
ctg5052□ctg1278□ctg4429□WAG-48N23  
ctg5052□ctg1278□ctg4429□WAG-69D14  
ctg5052□ctg1278□ctg6863□WAG-53O8  
ctg5052□ctg1278□ctg6863□WAG-111I21  
ctg5052□ctg1278□ctg6958□WAG-58E6  
ctg5052□ctg1278□ctg6958□WAG-104M19  
ctg5052□ctg1278□ctg6970□WAG-60N12  
ctg5052□ctg1278□ctg6970□WAG-75P8  
ctg5052□ctg6214□□WAG-12N17  
ctg5052□ctg6214□□WAG-56H20  
ctg5053□□□WAG-30N8  
ctg5053□ctg1274□□WAG-25K1  
ctg5053□ctg1274□□WAG-77H19  
ctg5053□ctg1274□ctg1488□WAG-31F2  
ctg5053□ctg1274□ctg1488□WAG-73F15  
ctg5053□ctg1274□ctg1488□WAG-89D4  
ctg5053□ctg1274□ctg1488□WAG-98M19  
ctg5053□ctg1274□ctg1847□WAG-53M2  
ctg5053□ctg1274□ctg1847□WAG-68F1  
ctg5053□ctg1274□ctg1847□WAG-99A24  
ctg5053□ctg1274□ctg1847□WAG-99D18  
ctg5053□ctg1274□ctg4726□WAG-12G8  
ctg5053□ctg1274□ctg4726□WAG-29F7  
ctg5054□□□WAG-42D1  
ctg5054□ctg708□□WAG-6N23  
ctg5054□ctg708□□WAG-14L15  
ctg5054□ctg708□□WAG-26J5  
ctg5054□ctg708□□WAG-47F3  
ctg5054□ctg708□□WAG-104P7  
ctg5054□ctg708□□WAG-120A8  
ctg5054□ctg708□ctg3081□WAG-20F18  
ctg5054□ctg708□ctg3081□WAG-55C15

ctg5054□ctg708□ctg3081□WAG-71K3  
ctg5054□ctg708□ctg5391□WAG-34P4  
ctg5054□ctg708□ctg5391□WAG-92G14  
ctg5055□□□WAG-31A23  
ctg5055□ctg422□□WAG-27J23  
ctg5055□ctg422□□WAG-38O6  
ctg5055□ctg422□ctg335□WAG-14F19  
ctg5055□ctg422□ctg335□WAG-23L10  
ctg5055□ctg422□ctg335□WAG-27N16  
ctg5055□ctg422□ctg335□WAG-44F14  
ctg5055□ctg422□ctg335□WAG-45C6  
ctg5055□ctg422□ctg335□WAG-54C10  
ctg5055□ctg422□ctg335□WAG-62I16  
ctg5055□ctg422□ctg335□WAG-65A4  
ctg5055□ctg422□ctg335□WAG-72N6  
ctg5055□ctg422□ctg335□WAG-73P13  
ctg5055□ctg422□ctg335□WAG-77P10  
ctg5055□ctg422□ctg335□WAG-90J21  
ctg5055□ctg422□ctg335□WAG-117F17  
ctg5055□ctg422□ctg335□WAG-121G5  
ctg5055□ctg422□ctg335□WAG-122E13  
ctg5056□□□WAG-2A9  
ctg5056□ctg311□ctg398□WAG-2P3  
ctg5056□ctg311□ctg398□WAG-29A19  
ctg5056□ctg311□ctg398□WAG-53L14  
ctg5056□ctg311□ctg398□WAG-64A9  
ctg5056□ctg311□ctg398□WAG-73P5  
ctg5056□ctg311□ctg398□WAG-75I21  
ctg5056□ctg311□ctg398□WAG-79F16  
ctg5056□ctg311□ctg398□WAG-86P3  
ctg5056□ctg311□ctg398□WAG-91E22  
ctg5056□ctg311□ctg398□WAG-117F7  
ctg5057□ctg3416□□WAG-12I15  
ctg5057□ctg3416□□WAG-22F23  
ctg5057□ctg3416□ctg6254□WAG-70L21  
ctg5057□ctg3416□ctg6254□WAG-103A9  
ctg5058□□□WAG-128G23  
ctg5058□ctg960□□WAG-2C10  
ctg5058□ctg960□□WAG-6F23  
ctg5058□ctg960□□WAG-10B5  
ctg5058□ctg960□ctg1094□WAG-60E3  
ctg5058□ctg960□ctg1094□WAG-118O3  
ctg5058□ctg960□ctg1094□WAG-119N18  
ctg5058□ctg960□ctg1094□WAG-127P16  
ctg5059□□□WAG-20K19  
ctg5059□ctg3144□□WAG-77E4  
ctg5059□ctg3144□ctg3157□WAG-72K1  
ctg5059□ctg3144□ctg3157□WAG-96K24  
ctg5059□ctg3144□ctg3157□WAG-120N16  
ctg506□□□WAG-31P1  
ctg506□□□WAG-89J7  
ctg506□ctg1330□□WAG-74O21  
ctg506□ctg1330□□WAG-121M13  
ctg506□ctg1330□ctg1549□WAG-17I6  
ctg506□ctg1330□ctg1549□WAG-24D15  
ctg506□ctg1330□ctg1549□WAG-28D6

ctg506□ctg1330□ctg1549□WAG-43A10  
ctg506□ctg1330□ctg1549□WAG-89O9  
ctg506□ctg1330□ctg1549□WAG-104A11  
ctg506□ctg1330□ctg1549□WAG-107J6  
ctg506□ctg1330□ctg1549□WAG-115J5  
ctg506□ctg1330□ctg1549□WAG-116M1  
ctg506□ctg1330□ctg3647□WAG-24G7  
ctg506□ctg1330□ctg3647□WAG-90D6  
ctg506□ctg1330□ctg3647□WAG-108N12  
ctg506□ctg1330□ctg3647□WAG-116K22  
ctg506□ctg3816□□WAG-123I1  
ctg506□ctg3816□ctg5307□WAG-45F18  
ctg506□ctg3816□ctg5307□WAG-45P8  
ctg506□ctg4560□ctg4698□WAG-70N21  
ctg506□ctg4560□ctg4698□WAG-125N11  
ctg5060□□□WAG-68F5  
ctg5060□□□WAG-101O13  
ctg5060□ctg215□□WAG-63P23  
ctg5060□ctg215□ctg370□WAG-1C10  
ctg5060□ctg215□ctg370□WAG-31H17  
ctg5060□ctg215□ctg370□WAG-44O22  
ctg5060□ctg215□ctg370□WAG-45L1  
ctg5060□ctg215□ctg370□WAG-61L22  
ctg5060□ctg215□ctg370□WAG-65J19  
ctg5060□ctg215□ctg370□WAG-68P21  
ctg5060□ctg215□ctg370□WAG-72M23  
ctg5060□ctg215□ctg370□WAG-77E23  
ctg5060□ctg215□ctg370□WAG-77I4  
ctg5060□ctg215□ctg370□WAG-79I24  
ctg5060□ctg215□ctg370□WAG-107E1  
ctg5060□ctg215□ctg370□WAG-108F11  
ctg5060□ctg215□ctg5180□WAG-51I9  
ctg5060□ctg215□ctg5180□WAG-119K3  
ctg5060□ctg215□ctg6606□WAG-61N24  
ctg5060□ctg215□ctg6606□WAG-108A19  
ctg5060□ctg215□ctg6908□WAG-12A2  
ctg5060□ctg215□ctg6908□WAG-31I22  
ctg5060□ctg215□ctg944□WAG-15P12  
ctg5060□ctg215□ctg944□WAG-49G10  
ctg5060□ctg215□ctg944□WAG-74H17  
ctg5060□ctg215□ctg944□WAG-74P7  
ctg5060□ctg215□ctg944□WAG-89B9  
ctg5060□ctg215□ctg944□WAG-89N7  
ctg5060□ctg215□ctg944□WAG-98G5  
ctg5060□ctg215□ctg944□WAG-101C17  
ctg5060□ctg215□ctg944□WAG-120C6  
ctg5060□ctg215□ctg944□WAG-121E1  
ctg5061□□□WAG-2B23  
ctg5061□□□WAG-35C14  
ctg5061□□□WAG-36L13  
ctg5061□□□WAG-98O6  
ctg5061□ctg179□□WAG-4A11  
ctg5061□ctg179□□WAG-41C19  
ctg5061□ctg179□□WAG-47O6  
ctg5061□ctg179□□WAG-51G18  
ctg5061□ctg179□□WAG-55K1

ctg5061□ctg179□□WAG-82O10  
ctg5061□ctg179□□WAG-93C11  
ctg5061□ctg179□ctg1167□WAG-12D17  
ctg5061□ctg179□ctg1167□WAG-22K3  
ctg5061□ctg179□ctg1167□WAG-70E9  
ctg5061□ctg179□ctg1167□WAG-123H12  
ctg5061□ctg179□ctg1370□WAG-35O7  
ctg5061□ctg179□ctg1370□WAG-67F9  
ctg5061□ctg179□ctg1370□WAG-104K16  
ctg5061□ctg179□ctg1370□WAG-127E14  
ctg5061□ctg179□ctg149□WAG-4C8  
ctg5061□ctg179□ctg149□WAG-17H10  
ctg5061□ctg179□ctg149□WAG-41B1  
ctg5061□ctg179□ctg149□WAG-43J24  
ctg5061□ctg179□ctg149□WAG-46B8  
ctg5061□ctg179□ctg149□WAG-50B20  
ctg5061□ctg179□ctg149□WAG-72P3  
ctg5061□ctg179□ctg149□WAG-76M5  
ctg5061□ctg179□ctg149□WAG-85F4  
ctg5061□ctg179□ctg149□WAG-98P16  
ctg5061□ctg179□ctg149□WAG-102A21  
ctg5061□ctg179□ctg149□WAG-109K10  
ctg5061□ctg179□ctg149□WAG-122M16  
ctg5061□ctg179□ctg2537□WAG-5E14  
ctg5061□ctg179□ctg2537□WAG-49I3  
ctg5061□ctg179□ctg2537□WAG-55P1  
ctg5061□ctg179□ctg2537□WAG-104B3  
ctg5061□ctg179□ctg271□WAG-5F11  
ctg5061□ctg179□ctg271□WAG-6O22  
ctg5061□ctg179□ctg271□WAG-7F12  
ctg5061□ctg179□ctg271□WAG-22A24  
ctg5061□ctg179□ctg271□WAG-23O10  
ctg5061□ctg179□ctg271□WAG-36M14  
ctg5061□ctg179□ctg271□WAG-40A16  
ctg5061□ctg179□ctg271□WAG-47L15  
ctg5061□ctg179□ctg271□WAG-48K5  
ctg5061□ctg179□ctg271□WAG-55O2  
ctg5061□ctg179□ctg271□WAG-61I22  
ctg5061□ctg179□ctg271□WAG-63F14  
ctg5061□ctg179□ctg271□WAG-64G8  
ctg5061□ctg179□ctg271□WAG-74I4  
ctg5061□ctg179□ctg271□WAG-91I17  
ctg5061□ctg179□ctg271□WAG-94B13  
ctg5061□ctg179□ctg271□WAG-100J19  
ctg5061□ctg179□ctg271□WAG-101C5  
ctg5061□ctg179□ctg271□WAG-112C15  
ctg5061□ctg179□ctg271□WAG-117N24  
ctg5061□ctg179□ctg271□WAG-118K16  
ctg5061□ctg179□ctg655□WAG-21M12  
ctg5061□ctg179□ctg655□WAG-26N16  
ctg5061□ctg179□ctg655□WAG-33B5  
ctg5061□ctg179□ctg655□WAG-33D8  
ctg5061□ctg179□ctg655□WAG-57D3  
ctg5061□ctg179□ctg655□WAG-80K24  
ctg5061□ctg179□ctg655□WAG-82E10  
ctg5061□ctg179□ctg655□WAG-83N2

ctg5061□ctg179□ctg655□WAG-95D23  
ctg5061□ctg179□ctg655□WAG-96L6  
ctg5061□ctg179□ctg655□WAG-97O21  
ctg5061□ctg179□ctg655□WAG-108C7  
ctg5061□ctg179□ctg655□WAG-113O4  
ctg5061□ctg179□ctg655□WAG-115I19  
ctg5061□ctg179□ctg655□WAG-117N7  
ctg5061□ctg179□ctg655□WAG-120I8  
ctg5061□ctg179□ctg655□WAG-121N6  
ctg5061□ctg179□ctg6561□WAG-61G4  
ctg5061□ctg179□ctg6561□WAG-61P19  
ctg5061□ctg6599□□WAG-13J4  
ctg5061□ctg6599□ctg1204□WAG-28C14  
ctg5061□ctg6599□ctg1204□WAG-28P16  
ctg5061□ctg6599□ctg1204□WAG-45M16  
ctg5061□ctg6599□ctg1204□WAG-52D18  
ctg5061□ctg6599□ctg1204□WAG-61K18  
ctg5061□ctg6599□ctg1204□WAG-92J14  
ctg5062□ctg2523□ctg4201□WAG-83E4  
ctg5062□ctg2523□ctg4201□WAG-100G7  
ctg5062□ctg2523□ctg4201□WAG-112C16  
ctg5062□ctg2523□ctg5680□WAG-62E9  
ctg5062□ctg2523□ctg5680□WAG-78M13  
ctg5062□ctg2523□ctg5872□WAG-16F23  
ctg5062□ctg2523□ctg5872□WAG-77E7  
ctg5063□ctg2323□ctg2227□WAG-20J23  
ctg5063□ctg2323□ctg2227□WAG-25M19  
ctg5063□ctg2323□ctg2227□WAG-50P9  
ctg5063□ctg2323□ctg2227□WAG-75C14  
ctg5064□□□WAG-6M8  
ctg5064□ctg1378□□WAG-91P22  
ctg5064□ctg1378□ctg1605□WAG-19I9  
ctg5064□ctg1378□ctg1605□WAG-28J2  
ctg5064□ctg1378□ctg1605□WAG-58I12  
ctg5064□ctg1378□ctg1605□WAG-104N10  
ctg5064□ctg1378□ctg1605□WAG-126F12  
ctg5064□ctg1378□ctg3290□WAG-68E17  
ctg5064□ctg1378□ctg3290□WAG-88F10  
ctg5064□ctg1378□ctg3290□WAG-99M22  
ctg5064□ctg1378□ctg3290□WAG-121K4  
ctg5065□ctg1765□□WAG-38B9  
ctg5065□ctg1765□□WAG-79I17  
ctg5065□ctg1765□ctg2060□WAG-12D19  
ctg5065□ctg1765□ctg2060□WAG-33I16  
ctg5065□ctg1765□ctg2060□WAG-42L22  
ctg5065□ctg1765□ctg2060□WAG-50A3  
ctg5065□ctg1765□ctg2060□WAG-54A1  
ctg5065□ctg1765□ctg2060□WAG-77G12  
ctg5065□ctg1765□ctg2060□WAG-86H17  
ctg5065□ctg1765□ctg2060□WAG-128P18  
ctg5065□ctg1765□ctg6408□WAG-64B5  
ctg5065□ctg1765□ctg6408□WAG-92M14  
ctg5066□□□WAG-10E10  
ctg5066□□□WAG-32I24  
ctg5066□□□WAG-39A20  
ctg5066□□□WAG-111I22

ctg5066□□□WAG-122N23  
ctg5066□ctg60□□WAG-2F21  
ctg5066□ctg60□□WAG-120L16  
ctg5066□ctg60□□WAG-125E11  
ctg5066□ctg60□ctg3171□WAG-24M15  
ctg5066□ctg60□ctg3171□WAG-47J10  
ctg5066□ctg60□ctg3171□WAG-126M16  
ctg5066□ctg60□ctg4748□WAG-68M12  
ctg5066□ctg60□ctg4748□WAG-70N9  
ctg5066□ctg60□ctg75□WAG-11L23  
ctg5066□ctg60□ctg75□WAG-22F15  
ctg5066□ctg60□ctg75□WAG-28K7  
ctg5066□ctg60□ctg75□WAG-33D24  
ctg5066□ctg60□ctg75□WAG-33K10  
ctg5066□ctg60□ctg75□WAG-49K23  
ctg5066□ctg60□ctg75□WAG-51J6  
ctg5066□ctg60□ctg75□WAG-57P15  
ctg5066□ctg60□ctg75□WAG-62B11  
ctg5066□ctg60□ctg75□WAG-65M17  
ctg5066□ctg60□ctg75□WAG-65P17  
ctg5066□ctg60□ctg75□WAG-66G20  
ctg5066□ctg60□ctg75□WAG-71G9  
ctg5066□ctg60□ctg75□WAG-73C15  
ctg5066□ctg60□ctg75□WAG-85B15  
ctg5066□ctg60□ctg75□WAG-85L12  
ctg5066□ctg60□ctg75□WAG-91J2  
ctg5066□ctg60□ctg75□WAG-98I18  
ctg5066□ctg60□ctg75□WAG-101L2  
ctg5066□ctg60□ctg75□WAG-103I13  
ctg5066□ctg60□ctg75□WAG-104O1  
ctg5066□ctg60□ctg75□WAG-109F15  
ctg5067□□□WAG-16K14  
ctg5067□□□WAG-101B17  
ctg5067□ctg6377□□WAG-111K24  
ctg5067□ctg6377□□WAG-112M4  
ctg5068□□□WAG-117M15  
ctg5068□ctg527□ctg582□WAG-9P6  
ctg5068□ctg527□ctg582□WAG-26A24  
ctg5068□ctg527□ctg582□WAG-34I18  
ctg5068□ctg527□ctg582□WAG-35O19  
ctg5068□ctg527□ctg582□WAG-56I20  
ctg5068□ctg527□ctg582□WAG-78H18  
ctg5068□ctg527□ctg582□WAG-82K24  
ctg5068□ctg527□ctg582□WAG-83A19  
ctg5068□ctg527□ctg582□WAG-107P17  
ctg5068□ctg527□ctg582□WAG-125K15  
ctg5068□ctg527□ctg582□WAG-129H21  
ctg5068□ctg527□ctg582□WAG-130J8  
ctg5068□ctg6394□□WAG-33F9  
ctg5068□ctg6394□□WAG-64A18  
ctg5069□□□WAG-2E13  
ctg5069□□□WAG-6P16  
ctg5069□□□WAG-40A17  
ctg5069□ctg3111□□WAG-111D18  
ctg5069□ctg3111□ctg4256□WAG-44G1  
ctg5069□ctg3111□ctg4256□WAG-71I24

ctg5069□ctg3111□ctg4256□WAG-88L11  
ctg5069□ctg3111□ctg4256□WAG-111C20  
ctg5069□ctg411□□WAG-40N15  
ctg5069□ctg411□ctg321□WAG-18C17  
ctg5069□ctg411□ctg321□WAG-42N15  
ctg5069□ctg411□ctg321□WAG-64C20  
ctg5069□ctg411□ctg321□WAG-70H21  
ctg5069□ctg411□ctg321□WAG-72H13  
ctg5069□ctg411□ctg321□WAG-76C21  
ctg5069□ctg411□ctg321□WAG-92I14  
ctg5069□ctg411□ctg321□WAG-104A23  
ctg5069□ctg411□ctg321□WAG-130A7  
ctg507□□□WAG-115K8  
ctg507□ctg1132□ctg966□WAG-3G15  
ctg507□ctg1132□ctg966□WAG-49K12  
ctg507□ctg1132□ctg966□WAG-103K19  
ctg507□ctg1132□ctg966□WAG-109C22  
ctg507□ctg1132□ctg966□WAG-117D13  
ctg5070□□□WAG-12H5  
ctg5070□□□WAG-37H19  
ctg5070□ctg2616□□WAG-65J21  
ctg5070□ctg2616□□WAG-88D20  
ctg5070□ctg2616□ctg3420□WAG-18O6  
ctg5070□ctg2616□ctg3420□WAG-63E23  
ctg5070□ctg2616□ctg3420□WAG-100L18  
ctg5070□ctg2616□ctg3420□WAG-121O5  
ctg5071□ctg3896□□WAG-84K13  
ctg5071□ctg3896□ctg5005□WAG-78D12  
ctg5071□ctg3896□ctg5005□WAG-82F14  
ctg5071□ctg879□□WAG-38E7  
ctg5071□ctg879□□WAG-108N23  
ctg5071□ctg879□ctg1270□WAG-2F6  
ctg5071□ctg879□ctg1270□WAG-5E9  
ctg5071□ctg879□ctg1270□WAG-33M11  
ctg5071□ctg879□ctg1270□WAG-54N20  
ctg5071□ctg879□ctg1270□WAG-57F4  
ctg5071□ctg879□ctg1270□WAG-61M16  
ctg5071□ctg879□ctg1270□WAG-62E10  
ctg5071□ctg879□ctg1270□WAG-86D9  
ctg5071□ctg879□ctg1270□WAG-87D8  
ctg5071□ctg879□ctg1270□WAG-92P21  
ctg5071□ctg879□ctg1270□WAG-103J16  
ctg5071□ctg879□ctg1270□WAG-112A2  
ctg5071□ctg879□ctg1270□WAG-118O23  
ctg5071□ctg879□ctg1270□WAG-123E1  
ctg5071□ctg879□ctg1270□WAG-124K12  
ctg5072□□□WAG-106E17  
ctg5072□□□WAG-114J14  
ctg5072□ctg219□□WAG-66N24  
ctg5072□ctg219□ctg1195□WAG-3F12  
ctg5072□ctg219□ctg1195□WAG-25D12  
ctg5072□ctg219□ctg1195□WAG-26M5  
ctg5072□ctg219□ctg1195□WAG-52I19  
ctg5072□ctg219□ctg1195□WAG-80N14  
ctg5072□ctg219□ctg1195□WAG-103I21  
ctg5072□ctg219□ctg1195□WAG-126H4

ctg5072□ctg219□ctg1195□WAG-129M17  
ctg5072□ctg219□ctg311□WAG-29P3  
ctg5072□ctg219□ctg311□WAG-30G15  
ctg5072□ctg219□ctg311□WAG-31E18  
ctg5072□ctg219□ctg311□WAG-40H5  
ctg5072□ctg219□ctg311□WAG-77G19  
ctg5072□ctg219□ctg311□WAG-78K10  
ctg5072□ctg219□ctg311□WAG-83A8  
ctg5072□ctg219□ctg311□WAG-90C11  
ctg5072□ctg219□ctg311□WAG-96D17  
ctg5072□ctg219□ctg311□WAG-116C21  
ctg5073□□□WAG-12L4  
ctg5073□□□WAG-101C2  
ctg5073□ctg182□□WAG-75O1  
ctg5073□ctg182□ctg185□WAG-8C22  
ctg5073□ctg182□ctg185□WAG-10B13  
ctg5073□ctg182□ctg185□WAG-13D5  
ctg5073□ctg182□ctg185□WAG-14N21  
ctg5073□ctg182□ctg185□WAG-19O2  
ctg5073□ctg182□ctg185□WAG-29E15  
ctg5073□ctg182□ctg185□WAG-36I16  
ctg5073□ctg182□ctg185□WAG-42J11  
ctg5073□ctg182□ctg185□WAG-43M13  
ctg5073□ctg182□ctg185□WAG-48D5  
ctg5073□ctg182□ctg185□WAG-72N3  
ctg5073□ctg182□ctg185□WAG-84C24  
ctg5073□ctg182□ctg185□WAG-86C6  
ctg5073□ctg182□ctg185□WAG-88H21  
ctg5073□ctg182□ctg185□WAG-90G14  
ctg5073□ctg182□ctg185□WAG-97K15  
ctg5073□ctg182□ctg185□WAG-98B3  
ctg5073□ctg182□ctg185□WAG-98E5  
ctg5073□ctg182□ctg185□WAG-101D11  
ctg5073□ctg182□ctg185□WAG-120E8  
ctg5073□ctg182□ctg185□WAG-122D7  
ctg5073□ctg182□ctg4195□WAG-10J12  
ctg5073□ctg182□ctg4195□WAG-37M11  
ctg5073□ctg182□ctg4195□WAG-108B16  
ctg5074□□□WAG-22O7  
ctg5074□□□WAG-35N24  
ctg5074□ctg2525□□WAG-26O19  
ctg5074□ctg2525□□WAG-34L8  
ctg5074□ctg2525□□WAG-44J20  
ctg5074□ctg2525□ctg4136□WAG-57I13  
ctg5074□ctg2525□ctg4136□WAG-68C21  
ctg5074□ctg2525□ctg4136□WAG-87C7  
ctg5074□ctg4007□□WAG-118K17  
ctg5074□ctg4007□ctg5445□WAG-93A10  
ctg5074□ctg4007□ctg5445□WAG-113D12  
ctg5075□ctg178□ctg234□WAG-43G16  
ctg5075□ctg178□ctg234□WAG-46A15  
ctg5075□ctg178□ctg234□WAG-51P15  
ctg5075□ctg178□ctg234□WAG-67P6  
ctg5075□ctg178□ctg234□WAG-81M2  
ctg5075□ctg178□ctg234□WAG-83G5  
ctg5075□ctg178□ctg234□WAG-99D19



ctg5075□ctg178□ctg234□WAG-121B8  
ctg5075□ctg178□ctg234□WAG-124E17  
ctg5076□ctg6057□□WAG-49J5  
ctg5076□ctg6057□□WAG-126E4  
ctg5077□ctg2410□□WAG-37L5  
ctg5077□ctg2410□□WAG-116J9  
ctg5077□ctg2410□ctg3714□WAG-37A5  
ctg5077□ctg2410□ctg3714□WAG-86A13  
ctg5077□ctg2410□ctg3714□WAG-103C20  
ctg5077□ctg2410□ctg5386□WAG-47B22  
ctg5077□ctg2410□ctg5386□WAG-103A14  
ctg5078□ctg1772□ctg2078□WAG-37A8  
ctg5078□ctg1772□ctg2078□WAG-59G22  
ctg5078□ctg1772□ctg2078□WAG-68G9  
ctg5078□ctg1772□ctg2078□WAG-81H19  
ctg5078□ctg1772□ctg2078□WAG-84J19  
ctg5078□ctg1772□ctg2078□WAG-124L11  
ctg5079□□□WAG-86I1  
ctg5079□□□WAG-93B4  
ctg5079□ctg1240□□WAG-9O3  
ctg5079□ctg1240□□WAG-46D11  
ctg5079□ctg1240□ctg2380□WAG-11H5  
ctg5079□ctg1240□ctg2380□WAG-11H6  
ctg5079□ctg1240□ctg2380□WAG-90E1  
ctg5079□ctg1240□ctg2965□WAG-8B6  
ctg5079□ctg1240□ctg2965□WAG-104M2  
ctg5079□ctg1240□ctg2965□WAG-129N12  
ctg5079□ctg1240□ctg5642□WAG-3D21  
ctg5079□ctg1240□ctg5642□WAG-65P11  
ctg5079□ctg31□ctg24□WAG-8N13  
ctg5079□ctg31□ctg24□WAG-24M12  
ctg5079□ctg31□ctg24□WAG-39M11  
ctg5079□ctg31□ctg24□WAG-45B8  
ctg5079□ctg31□ctg24□WAG-45I13  
ctg5079□ctg31□ctg24□WAG-62D11  
ctg5079□ctg31□ctg24□WAG-74I18  
ctg5079□ctg31□ctg24□WAG-81B5  
ctg5079□ctg31□ctg24□WAG-81F20  
ctg5079□ctg31□ctg24□WAG-84L14  
ctg5079□ctg31□ctg24□WAG-91J16  
ctg5079□ctg31□ctg24□WAG-110J2  
ctg5079□ctg31□ctg24□WAG-113B8  
ctg5079□ctg31□ctg24□WAG-113P16  
ctg5079□ctg31□ctg24□WAG-121L11  
ctg5079□ctg31□ctg24□WAG-125B11  
ctg5079□ctg31□ctg24□WAG-130A23  
ctg508□ctg1133□ctg968□WAG-20A12  
ctg508□ctg1133□ctg968□WAG-24M8  
ctg508□ctg1133□ctg968□WAG-66L21  
ctg508□ctg1133□ctg968□WAG-82N14  
ctg508□ctg1133□ctg968□WAG-98H18  
ctg508□ctg1133□ctg968□WAG-114C10  
ctg5080□ctg894□ctg932□WAG-19B4  
ctg5080□ctg894□ctg932□WAG-47G11  
ctg5080□ctg894□ctg932□WAG-48O18  
ctg5080□ctg894□ctg932□WAG-50A6

ctg5080□ctg894□ctg932□WAG-58F17  
ctg5080□ctg894□ctg932□WAG-62E8  
ctg5080□ctg894□ctg932□WAG-78H23  
ctg5080□ctg894□ctg932□WAG-95H10  
ctg5080□ctg894□ctg932□WAG-124J17  
ctg5081□□□WAG-42K15  
ctg5081□ctg315□□WAG-10I4  
ctg5081□ctg315□□WAG-13E17  
ctg5081□ctg315□□WAG-20E17  
ctg5081□ctg315□□WAG-26C12  
ctg5081□ctg315□□WAG-58A11  
ctg5081□ctg315□ctg1004□WAG-31C22  
ctg5081□ctg315□ctg1004□WAG-40G4  
ctg5081□ctg315□ctg1004□WAG-59H15  
ctg5081□ctg315□ctg1004□WAG-90P8  
ctg5081□ctg315□ctg1004□WAG-123E3  
ctg5081□ctg315□ctg1004□WAG-123E5  
ctg5081□ctg315□ctg660□WAG-3E3  
ctg5081□ctg315□ctg660□WAG-9O11  
ctg5081□ctg315□ctg660□WAG-16G17  
ctg5081□ctg315□ctg660□WAG-26E15  
ctg5081□ctg315□ctg660□WAG-33M14  
ctg5081□ctg315□ctg660□WAG-37C21  
ctg5081□ctg315□ctg660□WAG-39K19  
ctg5081□ctg315□ctg660□WAG-40G21  
ctg5081□ctg315□ctg660□WAG-41P1  
ctg5081□ctg315□ctg660□WAG-44G19  
ctg5081□ctg315□ctg660□WAG-63A12  
ctg5081□ctg315□ctg660□WAG-65D4  
ctg5081□ctg315□ctg660□WAG-73O17  
ctg5081□ctg315□ctg660□WAG-77B19  
ctg5081□ctg315□ctg660□WAG-87H4  
ctg5081□ctg315□ctg660□WAG-109I21  
ctg5081□ctg315□ctg660□WAG-113P3  
ctg5081□ctg315□ctg660□WAG-115I8  
ctg5081□ctg315□ctg660□WAG-125J2  
ctg5082□□□WAG-3D24  
ctg5082□ctg1498□□WAG-42H16  
ctg5082□ctg1498□□WAG-100E3  
ctg5082□ctg1498□ctg1710□WAG-29C20  
ctg5082□ctg1498□ctg1710□WAG-43C6  
ctg5082□ctg1498□ctg1710□WAG-63K20  
ctg5082□ctg1498□ctg1710□WAG-116F11  
ctg5082□ctg183□ctg1056□WAG-4O13  
ctg5082□ctg183□ctg1056□WAG-15K2  
ctg5082□ctg183□ctg1056□WAG-23D5  
ctg5082□ctg183□ctg1056□WAG-45A23  
ctg5082□ctg183□ctg1056□WAG-55F11  
ctg5082□ctg183□ctg1056□WAG-64P21  
ctg5082□ctg183□ctg1056□WAG-74L15  
ctg5082□ctg183□ctg1056□WAG-76M20  
ctg5082□ctg183□ctg1056□WAG-115F8  
ctg5082□ctg183□ctg194□WAG-24H13  
ctg5082□ctg183□ctg194□WAG-34N13  
ctg5082□ctg183□ctg194□WAG-50F21  
ctg5082□ctg183□ctg194□WAG-68E21

ctg5082□ctg183□ctg194□WAG-70F12  
ctg5082□ctg183□ctg194□WAG-84N23  
ctg5082□ctg183□ctg194□WAG-98D21  
ctg5082□ctg183□ctg194□WAG-127D20  
ctg5083□□□WAG-12C17  
ctg5083□□□WAG-22D19  
ctg5083□□□WAG-41G22  
ctg5083□□□WAG-42O9  
ctg5083□□□WAG-104G21  
ctg5083□□□WAG-109E9  
ctg5083□□□WAG-113L7  
ctg5083□□□WAG-126J20  
ctg5083□ctg17□ctg18□WAG-1C11  
ctg5083□ctg17□ctg18□WAG-1L5  
ctg5083□ctg17□ctg18□WAG-6L23  
ctg5083□ctg17□ctg18□WAG-17D15  
ctg5083□ctg17□ctg18□WAG-18I19  
ctg5083□ctg17□ctg18□WAG-24C10  
ctg5083□ctg17□ctg18□WAG-33K11  
ctg5083□ctg17□ctg18□WAG-34I8  
ctg5083□ctg17□ctg18□WAG-34P5  
ctg5083□ctg17□ctg18□WAG-35K19  
ctg5083□ctg17□ctg18□WAG-38G15  
ctg5083□ctg17□ctg18□WAG-38M15  
ctg5083□ctg17□ctg18□WAG-41L6  
ctg5083□ctg17□ctg18□WAG-48I9  
ctg5083□ctg17□ctg18□WAG-53J19  
ctg5083□ctg17□ctg18□WAG-65D22  
ctg5083□ctg17□ctg18□WAG-72J23  
ctg5083□ctg17□ctg18□WAG-73P20  
ctg5083□ctg17□ctg18□WAG-74B14  
ctg5083□ctg17□ctg18□WAG-77E5  
ctg5083□ctg17□ctg18□WAG-79H4  
ctg5083□ctg17□ctg18□WAG-83K10  
ctg5083□ctg17□ctg18□WAG-83O24  
ctg5083□ctg17□ctg18□WAG-85C19  
ctg5083□ctg17□ctg18□WAG-86M3  
ctg5083□ctg17□ctg18□WAG-94E20  
ctg5083□ctg17□ctg18□WAG-97E4  
ctg5083□ctg17□ctg18□WAG-100N14  
ctg5083□ctg17□ctg18□WAG-104E21  
ctg5083□ctg17□ctg18□WAG-107B2  
ctg5083□ctg17□ctg18□WAG-109A6  
ctg5083□ctg17□ctg18□WAG-109B15  
ctg5083□ctg17□ctg18□WAG-110K3  
ctg5083□ctg17□ctg18□WAG-111E4  
ctg5083□ctg17□ctg18□WAG-112F23  
ctg5083□ctg17□ctg18□WAG-115F13  
ctg5083□ctg17□ctg18□WAG-116E9  
ctg5083□ctg17□ctg18□WAG-117C23  
ctg5083□ctg17□ctg18□WAG-120B10  
ctg5083□ctg17□ctg18□WAG-121B11  
ctg5083□ctg17□ctg18□WAG-125B12  
ctg5083□ctg76□ctg57□WAG-12F10  
ctg5083□ctg76□ctg57□WAG-19K1  
ctg5083□ctg76□ctg57□WAG-22K6

ctg5083□ctg76□ctg57□WAG-41O5  
ctg5083□ctg76□ctg57□WAG-64H19  
ctg5083□ctg76□ctg57□WAG-68L24  
ctg5083□ctg76□ctg57□WAG-90C12  
ctg5083□ctg76□ctg57□WAG-101O10  
ctg5083□ctg76□ctg57□WAG-117J7  
ctg5084□□□WAG-22J22  
ctg5084□□□WAG-27I20  
ctg5084□ctg2528□□WAG-42L10  
ctg5084□ctg2528□ctg2684□WAG-74H4  
ctg5084□ctg2528□ctg2684□WAG-83J4  
ctg5084□ctg2528□ctg2684□WAG-108B6  
ctg5084□ctg4□□WAG-56F11  
ctg5084□ctg4□□WAG-106P23  
ctg5084□ctg4□ctg1142□WAG-16O14  
ctg5084□ctg4□ctg1142□WAG-30K18  
ctg5084□ctg4□ctg1142□WAG-37F17  
ctg5084□ctg4□ctg1142□WAG-46I7  
ctg5084□ctg4□ctg1142□WAG-46M21  
ctg5084□ctg4□ctg1142□WAG-70A7  
ctg5084□ctg4□ctg1142□WAG-72M4  
ctg5084□ctg4□ctg1142□WAG-80C16  
ctg5084□ctg4□ctg1142□WAG-111J16  
ctg5084□ctg4□ctg1142□WAG-117P20  
ctg5084□ctg4□ctg4□WAG-1A11  
ctg5084□ctg4□ctg4□WAG-18H4  
ctg5084□ctg4□ctg4□WAG-24O24  
ctg5084□ctg4□ctg4□WAG-38E9  
ctg5084□ctg4□ctg4□WAG-47C24  
ctg5084□ctg4□ctg4□WAG-50O4  
ctg5084□ctg4□ctg4□WAG-52H1  
ctg5084□ctg4□ctg4□WAG-62I9  
ctg5084□ctg4□ctg4□WAG-62L16  
ctg5084□ctg4□ctg4□WAG-62O9  
ctg5084□ctg4□ctg4□WAG-63J12  
ctg5084□ctg4□ctg4□WAG-70E16  
ctg5084□ctg4□ctg4□WAG-72B22  
ctg5084□ctg4□ctg4□WAG-75J14  
ctg5084□ctg4□ctg4□WAG-85J13  
ctg5084□ctg4□ctg4□WAG-85K19  
ctg5084□ctg4□ctg4□WAG-92J16  
ctg5084□ctg4□ctg4□WAG-104G16  
ctg5084□ctg4□ctg4□WAG-107I7  
ctg5084□ctg4□ctg4□WAG-113A18  
ctg5084□ctg4□ctg4□WAG-120M23  
ctg5084□ctg4□ctg4□WAG-121J9  
ctg5084□ctg4□ctg55□WAG-9J18  
ctg5084□ctg4□ctg55□WAG-10A7  
ctg5084□ctg4□ctg55□WAG-25L15  
ctg5084□ctg4□ctg55□WAG-26C24  
ctg5084□ctg4□ctg55□WAG-29G1  
ctg5084□ctg4□ctg55□WAG-29G21  
ctg5084□ctg4□ctg55□WAG-31B1  
ctg5084□ctg4□ctg55□WAG-38N2  
ctg5084□ctg4□ctg55□WAG-45E24  
ctg5084□ctg4□ctg55□WAG-49F4

ctg5084□ctg4□ctg55□WAG-61H3  
ctg5084□ctg4□ctg55□WAG-61N22  
ctg5084□ctg4□ctg55□WAG-63P17  
ctg5084□ctg4□ctg55□WAG-65L17  
ctg5084□ctg4□ctg55□WAG-75N21  
ctg5084□ctg4□ctg55□WAG-87M22  
ctg5084□ctg4□ctg55□WAG-93C3  
ctg5084□ctg4□ctg55□WAG-108G18  
ctg5084□ctg4□ctg55□WAG-122F14  
ctg5084□ctg4□ctg55□WAG-127L14  
ctg5084□ctg4□ctg55□WAG-129F9  
ctg5085□□□WAG-53J16  
ctg5085□ctg213□ctg178□WAG-21N12  
ctg5085□ctg213□ctg178□WAG-66K16  
ctg5085□ctg213□ctg178□WAG-72M17  
ctg5085□ctg213□ctg178□WAG-76O6  
ctg5085□ctg213□ctg178□WAG-91L4  
ctg5085□ctg213□ctg178□WAG-92N21  
ctg5085□ctg213□ctg178□WAG-99O8  
ctg5085□ctg213□ctg178□WAG-120A7  
ctg5085□ctg213□ctg178□WAG-128P5  
ctg5085□ctg213□ctg3580□WAG-70E15  
ctg5085□ctg213□ctg3580□WAG-76B12  
ctg5085□ctg213□ctg3580□WAG-86J14  
ctg5085□ctg213□ctg3580□WAG-98D7  
ctg5085□ctg213□ctg5606□WAG-106E7  
ctg5085□ctg213□ctg5606□WAG-113A17  
ctg5085□ctg213□ctg5606□WAG-114C9  
ctg5086□□□WAG-1F13  
ctg5086□ctg2294□ctg2422□WAG-16I10  
ctg5086□ctg2294□ctg2422□WAG-26M19  
ctg5086□ctg2294□ctg2422□WAG-62G2  
ctg5086□ctg2294□ctg2422□WAG-76P10  
ctg5086□ctg2294□ctg2422□WAG-107C22  
ctg5086□ctg2294□ctg2422□WAG-111F16  
ctg5087□□□WAG-26K13  
ctg5087□□□WAG-60K19  
ctg5087□□□WAG-119J23  
ctg5087□□□WAG-128M3  
ctg5087□ctg871□□□WAG-6F13  
ctg5087□ctg871□□□WAG-57B15  
ctg5087□ctg871□ctg1523□WAG-50B7  
ctg5087□ctg871□ctg1523□WAG-70D2  
ctg5087□ctg871□ctg1523□WAG-82D11  
ctg5087□ctg871□ctg1523□WAG-107A15  
ctg5087□ctg871□ctg1523□WAG-128P20  
ctg5087□ctg871□ctg2358□WAG-61G16  
ctg5087□ctg871□ctg2358□WAG-76J12  
ctg5087□ctg871□ctg2358□WAG-98C8  
ctg5087□ctg871□ctg6587□WAG-10M14  
ctg5087□ctg871□ctg6587□WAG-68I13  
ctg5087□ctg871□ctg6936□WAG-23M24  
ctg5087□ctg871□ctg6936□WAG-56B15  
ctg5088□□□WAG-91C18  
ctg5088□□□WAG-109O17  
ctg5088□ctg3790□ctg4046□WAG-55P8

ctg5088□ctg3790□ctg4046□WAG-70D21  
ctg5088□ctg3790□ctg4046□WAG-100D9  
ctg5088□ctg3790□ctg4046□WAG-104B1  
ctg5089□ctg663□ctg3567□WAG-20F14  
ctg5089□ctg663□ctg3567□WAG-55P14  
ctg5089□ctg663□ctg3567□WAG-72N8  
ctg5089□ctg663□ctg5369□WAG-4J10  
ctg5089□ctg663□ctg5369□WAG-21O10  
ctg5089□ctg663□ctg538□WAG-8N20  
ctg5089□ctg663□ctg538□WAG-21N18  
ctg5089□ctg663□ctg538□WAG-57C6  
ctg5089□ctg663□ctg538□WAG-85M20  
ctg5089□ctg663□ctg538□WAG-88F3  
ctg5089□ctg663□ctg538□WAG-94J22  
ctg5089□ctg663□ctg538□WAG-96C4  
ctg5089□ctg663□ctg538□WAG-114L8  
ctg5089□ctg663□ctg626□WAG-16F17  
ctg5089□ctg663□ctg626□WAG-19I24  
ctg5089□ctg663□ctg626□WAG-37E21  
ctg5089□ctg663□ctg626□WAG-46N15  
ctg5089□ctg663□ctg626□WAG-102F10  
ctg5089□ctg663□ctg626□WAG-126C13  
ctg509□□□WAG-69O17  
ctg509□ctg1598□ctg3101□WAG-62L13  
ctg509□ctg1598□ctg3101□WAG-108K10  
ctg509□ctg1598□ctg3101□WAG-114P10  
ctg509□ctg1598□ctg3101□WAG-122F13  
ctg509□ctg1598□ctg6771□WAG-30E23  
ctg509□ctg1598□ctg6771□WAG-119A4  
ctg509□ctg3277□□WAG-48O22  
ctg509□ctg3277□ctg4344□WAG-90E19  
ctg509□ctg3277□ctg4344□WAG-120E5  
ctg509□ctg3277□ctg5466□WAG-40I21  
ctg509□ctg3277□ctg5466□WAG-106D18  
ctg509□ctg4816□□WAG-17O13  
ctg509□ctg4816□□WAG-20H1  
ctg509□ctg4816□□WAG-49N21  
ctg5090□□□WAG-G20  
ctg5090□□□WAG-31N20  
ctg5090□□□WAG-112P6  
ctg5090□ctg2073□ctg1927□WAG-18G8  
ctg5090□ctg2073□ctg1927□WAG-38C15  
ctg5090□ctg2073□ctg1927□WAG-47I21  
ctg5090□ctg2073□ctg1927□WAG-112H2  
ctg5090□ctg2501□□WAG-41J7  
ctg5090□ctg2501□ctg2429□WAG-35P19  
ctg5090□ctg2501□ctg2429□WAG-48A12  
ctg5090□ctg2501□ctg2429□WAG-86M9  
ctg5090□ctg734□ctg589□WAG-9O23  
ctg5090□ctg734□ctg589□WAG-14D23  
ctg5090□ctg734□ctg589□WAG-19K20  
ctg5090□ctg734□ctg589□WAG-28G11  
ctg5090□ctg734□ctg589□WAG-52E23  
ctg5090□ctg734□ctg589□WAG-55B21  
ctg5090□ctg734□ctg589□WAG-58F2  
ctg5090□ctg734□ctg589□WAG-66D7

ctg5090□ctg734□ctg589□WAG-80K5  
ctg5090□ctg734□ctg589□WAG-97L9  
ctg5090□ctg734□ctg589□WAG-100A1  
ctg5090□ctg734□ctg589□WAG-101K24  
ctg5090□ctg734□ctg589□WAG-105A1  
ctg5090□ctg734□ctg589□WAG-109H19  
ctg5090□ctg734□ctg589□WAG-109K13  
ctg5090□ctg734□ctg589□WAG-122P3  
ctg5090□ctg734□ctg589□WAG-123H19  
ctg5091□□□WAG-6L9  
ctg5091□ctg938□□WAG-63O24  
ctg5091□ctg938□□WAG-71G17  
ctg5091□ctg938□ctg1022□WAG-5M13  
ctg5091□ctg938□ctg1022□WAG-22A22  
ctg5091□ctg938□ctg1022□WAG-24D22  
ctg5091□ctg938□ctg1022□WAG-70H20  
ctg5091□ctg938□ctg1022□WAG-73M16  
ctg5091□ctg938□ctg1022□WAG-75P3  
ctg5091□ctg938□ctg1022□WAG-101M16  
ctg5091□ctg938□ctg1022□WAG-120H17  
ctg5091□ctg938□ctg1022□WAG-127J22  
ctg5091□ctg938□ctg4930□WAG-45N14  
ctg5091□ctg938□ctg4930□WAG-58G10  
ctg5092□□□WAG-30P17  
ctg5092□□□WAG-86D1  
ctg5092□□□WAG-98L17  
ctg5092□□□WAG-100P9  
ctg5092□□□WAG-121E3  
ctg5092□□□WAG-126C6  
ctg5092□ctg128□□WAG-38N18  
ctg5092□ctg128□□WAG-105N10  
ctg5092□ctg128□ctg1641□WAG-18H9  
ctg5092□ctg128□ctg1641□WAG-26C9  
ctg5092□ctg128□ctg1641□WAG-37P11  
ctg5092□ctg128□ctg1641□WAG-64E7  
ctg5092□ctg128□ctg1641□WAG-72H16  
ctg5092□ctg128□ctg1641□WAG-78I4  
ctg5092□ctg128□ctg1641□WAG-87A7  
ctg5092□ctg128□ctg1641□WAG-109G20  
ctg5092□ctg128□ctg231□WAG-19H11  
ctg5092□ctg128□ctg231□WAG-19H21  
ctg5092□ctg128□ctg231□WAG-22F1  
ctg5092□ctg128□ctg231□WAG-25L21  
ctg5092□ctg128□ctg231□WAG-28I21  
ctg5092□ctg128□ctg231□WAG-29L1  
ctg5092□ctg128□ctg231□WAG-37P9  
ctg5092□ctg128□ctg231□WAG-39F5  
ctg5092□ctg128□ctg231□WAG-45G1  
ctg5092□ctg128□ctg231□WAG-47K4  
ctg5092□ctg128□ctg231□WAG-62D5  
ctg5092□ctg128□ctg231□WAG-65M11  
ctg5092□ctg128□ctg231□WAG-78I11  
ctg5092□ctg128□ctg231□WAG-80G23  
ctg5092□ctg128□ctg231□WAG-82M24  
ctg5092□ctg128□ctg231□WAG-85D21  
ctg5092□ctg128□ctg231□WAG-90G22

ctg5092□ctg128□ctg231□WAG-93L21  
ctg5092□ctg128□ctg231□WAG-105C10  
ctg5092□ctg128□ctg231□WAG-112N10  
ctg5092□ctg128□ctg231□WAG-114N19  
ctg5092□ctg128□ctg231□WAG-119F16  
ctg5092□ctg128□ctg231□WAG-123N24  
ctg5093□ctg813□□WAG-52K21  
ctg5093□ctg813□□WAG-113B18  
ctg5093□ctg813□ctg2663□WAG-15K9  
ctg5093□ctg813□ctg2663□WAG-29K16  
ctg5093□ctg813□ctg2663□WAG-31O12  
ctg5093□ctg813□ctg2663□WAG-80A21  
ctg5093□ctg813□ctg5936□WAG-31F8  
ctg5093□ctg813□ctg5936□WAG-67H9  
ctg5093□ctg813□ctg861□WAG-25J6  
ctg5093□ctg813□ctg861□WAG-30E11  
ctg5093□ctg813□ctg861□WAG-53M7  
ctg5093□ctg813□ctg861□WAG-82M16  
ctg5093□ctg813□ctg861□WAG-88L14  
ctg5093□ctg813□ctg861□WAG-88M6  
ctg5094□ctg5199□ctg5917□WAG-66C10  
ctg5094□ctg5199□ctg5917□WAG-69N21  
ctg5095□ctg3175□□WAG-69A23  
ctg5095□ctg3175□□WAG-105E13  
ctg5095□ctg3175□ctg6158□WAG-85M1  
ctg5095□ctg3175□ctg6158□WAG-93C9  
ctg5095□ctg57□ctg2219□WAG-10H8  
ctg5095□ctg57□ctg2219□WAG-27L18  
ctg5095□ctg57□ctg2219□WAG-45N9  
ctg5095□ctg57□ctg2219□WAG-92G7  
ctg5095□ctg57□ctg317□WAG-11H11  
ctg5095□ctg57□ctg317□WAG-17C22  
ctg5095□ctg57□ctg317□WAG-32B20  
ctg5095□ctg57□ctg317□WAG-39G18  
ctg5095□ctg57□ctg317□WAG-41N9  
ctg5095□ctg57□ctg317□WAG-41N10  
ctg5095□ctg57□ctg317□WAG-125I2  
ctg5095□ctg57□ctg6688□WAG-39E21  
ctg5095□ctg57□ctg6688□WAG-88H24  
ctg5095□ctg57□ctg68□WAG-14F23  
ctg5095□ctg57□ctg68□WAG-23F21  
ctg5095□ctg57□ctg68□WAG-28D17  
ctg5095□ctg57□ctg68□WAG-39F3  
ctg5095□ctg57□ctg68□WAG-95M21  
ctg5095□ctg57□ctg68□WAG-119E5  
ctg5095□ctg57□ctg68□WAG-122J20  
ctg5095□ctg57□ctg87□WAG-7I3  
ctg5095□ctg57□ctg87□WAG-41B20  
ctg5095□ctg57□ctg87□WAG-41F16  
ctg5095□ctg57□ctg87□WAG-44M19  
ctg5095□ctg57□ctg87□WAG-52F21  
ctg5095□ctg57□ctg87□WAG-65K6  
ctg5095□ctg57□ctg87□WAG-92L18  
ctg5095□ctg57□ctg87□WAG-113J13  
ctg5095□ctg57□ctg87□WAG-114O5  
ctg5095□ctg57□ctg87□WAG-122M19



ctg5095□ctg57□ctg891□WAG-54O2  
ctg5095□ctg57□ctg891□WAG-65D3  
ctg5095□ctg57□ctg891□WAG-73N3  
ctg5095□ctg57□ctg891□WAG-82O9  
ctg5095□ctg57□ctg891□WAG-122P15  
ctg5096□□□WAG-19M17  
ctg5096□□□WAG-86H9  
ctg5096□ctg2543□ctg2470□WAG-88J12  
ctg5096□ctg2543□ctg2470□WAG-88K2  
ctg5096□ctg2543□ctg2470□WAG-102L1  
ctg5096□ctg2543□ctg2470□WAG-116H13  
ctg5096□ctg289□□WAG-98J9  
ctg5096□ctg289□ctg221□WAG-9H6  
ctg5096□ctg289□ctg221□WAG-18P8  
ctg5096□ctg289□ctg221□WAG-49G7  
ctg5096□ctg289□ctg221□WAG-55P12  
ctg5096□ctg289□ctg221□WAG-63G16  
ctg5096□ctg289□ctg221□WAG-84E5  
ctg5096□ctg289□ctg221□WAG-89O24  
ctg5096□ctg289□ctg221□WAG-115H14  
ctg5096□ctg289□ctg221□WAG-128J10  
ctg5096□ctg726□□WAG-62M19  
ctg5096□ctg726□ctg1854□WAG-9K12  
ctg5096□ctg726□ctg1854□WAG-44C23  
ctg5096□ctg726□ctg1854□WAG-65J12  
ctg5096□ctg726□ctg1854□WAG-90O1  
ctg5096□ctg726□ctg1854□WAG-110C23  
ctg5096□ctg726□ctg1854□WAG-126E15  
ctg5096□ctg726□ctg1854□WAG-127M17  
ctg5096□ctg726□ctg1866□WAG-36K2  
ctg5096□ctg726□ctg1866□WAG-43J2  
ctg5096□ctg726□ctg1866□WAG-79J24  
ctg5096□ctg726□ctg1866□WAG-89N8  
ctg5096□ctg726□ctg979□WAG-64K12  
ctg5096□ctg726□ctg979□WAG-72D20  
ctg5096□ctg726□ctg979□WAG-78F3  
ctg5096□ctg726□ctg979□WAG-113B23  
ctg5096□ctg726□ctg979□WAG-121J10  
ctg5096□ctg726□ctg979□WAG-122M22  
ctg5097□□□WAG-6H12  
ctg5097□ctg1200□□WAG-76H21  
ctg5097□ctg1200□ctg1334□WAG-42B23  
ctg5097□ctg1200□ctg1334□WAG-50G3  
ctg5097□ctg1200□ctg1334□WAG-73J2  
ctg5097□ctg1200□ctg1334□WAG-74J9  
ctg5097□ctg1200□ctg1334□WAG-102K15  
ctg5097□ctg1200□ctg1334□WAG-116B2  
ctg5098□□□WAG-8F2  
ctg5098□□□WAG-35C20  
ctg5098□□□WAG-36J11  
ctg5098□□□WAG-49K21  
ctg5098□□□WAG-105B6  
ctg5098□ctg1449□□WAG-5P10  
ctg5098□ctg1449□□WAG-6E11  
ctg5098□ctg1449□□WAG-46C17  
ctg5098□ctg1449□□WAG-73L16

ctg5098□ctg1449□ctg1439□WAG-15H21  
ctg5098□ctg1449□ctg1439□WAG-32H5  
ctg5098□ctg1449□ctg1439□WAG-32J4  
ctg5098□ctg1449□ctg1439□WAG-79M3  
ctg5098□ctg1449□ctg1439□WAG-113B22  
ctg5098□ctg1449□ctg1689□WAG-57A13  
ctg5098□ctg1449□ctg1689□WAG-64I1  
ctg5098□ctg1449□ctg1689□WAG-72H3  
ctg5098□ctg1913□ctg3087□WAG-23K14  
ctg5098□ctg1913□ctg3087□WAG-58C6  
ctg5098□ctg1913□ctg3087□WAG-97D13  
ctg5098□ctg1913□ctg6944□WAG-12A13  
ctg5098□ctg1913□ctg6944□WAG-16B16  
ctg5098□ctg2575□□WAG-48G14  
ctg5098□ctg2575□ctg2529□WAG-37G16  
ctg5098□ctg2575□ctg2529□WAG-43O3  
ctg5098□ctg2575□ctg2529□WAG-85O17  
ctg5098□ctg2575□ctg2529□WAG-123B13  
ctg5099□ctg3293□ctg3343□WAG-12E11  
ctg5099□ctg3293□ctg3343□WAG-85H17  
ctg5099□ctg3293□ctg3343□WAG-125O10  
ctg51□□□WAG-41A3  
ctg51□ctg316□□WAG-29M23  
ctg51□ctg316□□WAG-96P22  
ctg51□ctg316□ctg459□WAG-9I6  
ctg51□ctg316□ctg459□WAG-13B11  
ctg51□ctg316□ctg459□WAG-29G3  
ctg51□ctg316□ctg459□WAG-33L7  
ctg51□ctg316□ctg459□WAG-44J15  
ctg51□ctg316□ctg459□WAG-60N5  
ctg51□ctg316□ctg459□WAG-70I1  
ctg51□ctg316□ctg459□WAG-79E3  
ctg51□ctg316□ctg459□WAG-87P7  
ctg51□ctg316□ctg459□WAG-92H1  
ctg51□ctg316□ctg459□WAG-104G23  
ctg51□ctg316□ctg459□WAG-107K21  
ctg51□ctg316□ctg459□WAG-112A4  
ctg51□ctg316□ctg6013□WAG-7H2  
ctg51□ctg316□ctg6013□WAG-86B22  
ctg51□ctg3562□ctg3730□WAG-73D24  
ctg51□ctg3562□ctg3730□WAG-96G6  
ctg51□ctg3562□ctg3730□WAG-105L24  
ctg510□□□WAG-108P21  
ctg510□ctg1134□ctg1314□WAG-41K1  
ctg510□ctg1134□ctg1314□WAG-44F11  
ctg510□ctg1134□ctg1314□WAG-44J16  
ctg510□ctg1134□ctg1314□WAG-79G3  
ctg510□ctg1134□ctg1314□WAG-93O11  
ctg510□ctg3122□□WAG-85E14  
ctg510□ctg3122□□WAG-91M21  
ctg510□ctg3122□ctg5351□WAG-75H3  
ctg510□ctg3122□ctg5351□WAG-86J19  
ctg5100□□□WAG-21C17  
ctg5100□□□WAG-47H20  
ctg5100□ctg1121□□WAG-15B3  
ctg5100□ctg1121□ctg959□WAG-35G3

ctg5100□ctg1121□ctg959□WAG-49G1  
ctg5100□ctg1121□ctg959□WAG-76O2  
ctg5100□ctg1121□ctg959□WAG-77J20  
ctg5100□ctg1121□ctg959□WAG-78C1  
ctg5100□ctg1121□ctg959□WAG-82C2  
ctg5100□ctg1121□ctg959□WAG-121E5  
ctg5100□ctg1121□ctg959□WAG-124J2  
ctg5100□ctg1121□ctg959□WAG-125E24  
ctg5100□ctg1121□ctg959□WAG-127A15  
ctg5101□ctg1523□□WAG-16J3  
ctg5101□ctg1523□ctg1814□WAG-21O18  
ctg5101□ctg1523□ctg1814□WAG-32G4  
ctg5101□ctg1523□ctg1814□WAG-51J12  
ctg5101□ctg1523□ctg1814□WAG-62N13  
ctg5101□ctg1523□ctg1814□WAG-105O16  
ctg5101□ctg1523□ctg1814□WAG-110F4  
ctg5101□ctg1523□ctg1814□WAG-121I7  
ctg5101□ctg1523□ctg3832□WAG-45D1  
ctg5101□ctg1523□ctg3832□WAG-106O8  
ctg5101□ctg1523□ctg3832□WAG-110C16  
ctg5102□□□WAG-40N10  
ctg5102□□□WAG-90B14  
ctg5102□ctg3150□□WAG-3D19  
ctg5102□ctg3150□ctg4292□WAG-87L17  
ctg5102□ctg3150□ctg4292□WAG-92N8  
ctg5103□□□WAG-52C2  
ctg5103□ctg2611□ctg3181□WAG-15N17  
ctg5103□ctg2611□ctg3181□WAG-17H11  
ctg5103□ctg2611□ctg3181□WAG-73I11  
ctg5103□ctg2611□ctg3181□WAG-99B11  
ctg5103□ctg2611□ctg3181□WAG-105P11  
ctg5103□ctg4805□□WAG-45D24  
ctg5103□ctg4805□□WAG-63K4  
ctg5103□ctg4805□□WAG-111H3  
ctg5104□ctg477□□WAG-6M22  
ctg5104□ctg477□□WAG-108H4  
ctg5104□ctg477□ctg1252□WAG-13B12  
ctg5104□ctg477□ctg1252□WAG-25N8  
ctg5104□ctg477□ctg1252□WAG-30I5  
ctg5104□ctg477□ctg1252□WAG-56B18  
ctg5104□ctg477□ctg1252□WAG-61P20  
ctg5104□ctg477□ctg1252□WAG-85N3  
ctg5104□ctg477□ctg1252□WAG-120N12  
ctg5104□ctg477□ctg1252□WAG-125O20  
ctg5104□ctg477□ctg3857□WAG-23A6  
ctg5104□ctg477□ctg3857□WAG-25C5  
ctg5104□ctg477□ctg3857□WAG-27C16  
ctg5104□ctg477□ctg3857□WAG-53D9  
ctg5104□ctg477□ctg503□WAG-38F21  
ctg5104□ctg477□ctg503□WAG-41B24  
ctg5104□ctg477□ctg503□WAG-42C4  
ctg5104□ctg477□ctg503□WAG-46A24  
ctg5104□ctg477□ctg503□WAG-69F7  
ctg5104□ctg477□ctg503□WAG-77H24  
ctg5104□ctg477□ctg503□WAG-102I24  
ctg5104□ctg477□ctg503□WAG-110I23

ctg5104□ctg477□ctg503□WAG-121H6  
ctg5105□ctg5480□ctg6560□WAG-18I23  
ctg5105□ctg5480□ctg6560□WAG-61M5  
ctg5106□□□WAG-30J24  
ctg5106□ctg1108□□WAG-65H16  
ctg5106□ctg1108□ctg1241□WAG-11D12  
ctg5106□ctg1108□ctg1241□WAG-14B14  
ctg5106□ctg1108□ctg1241□WAG-35G5  
ctg5106□ctg1108□ctg1241□WAG-77N20  
ctg5107□ctg1075□ctg1047□WAG-8K9  
ctg5107□ctg1075□ctg1047□WAG-12I6  
ctg5107□ctg1075□ctg1047□WAG-13F1  
ctg5107□ctg1075□ctg1047□WAG-58A19  
ctg5107□ctg1075□ctg1047□WAG-91F20  
ctg5107□ctg1075□ctg1047□WAG-125H15  
ctg5108□□□WAG-88B11  
ctg5108□ctg306□□WAG-83G7  
ctg5108□ctg306□ctg4727□WAG-9G4  
ctg5108□ctg306□ctg4727□WAG-21F6  
ctg5108□ctg306□ctg809□WAG-22M18  
ctg5108□ctg306□ctg809□WAG-25P24  
ctg5108□ctg306□ctg809□WAG-38J4  
ctg5108□ctg306□ctg809□WAG-41D3  
ctg5108□ctg306□ctg809□WAG-49K1  
ctg5108□ctg306□ctg809□WAG-65E18  
ctg5108□ctg306□ctg809□WAG-74A24  
ctg5108□ctg306□ctg809□WAG-102I19  
ctg5108□ctg306□ctg809□WAG-102P8  
ctg5108□ctg306□ctg809□WAG-104B23  
ctg5108□ctg306□ctg809□WAG-109E7  
ctg5108□ctg306□ctg809□WAG-110F1  
ctg5109□□□WAG-35P7  
ctg5109□ctg5543□ctg6676□WAG-60O10  
ctg5109□ctg5543□ctg6676□WAG-112N15  
ctg511□ctg1331□□WAG-33B3  
ctg511□ctg1331□□WAG-65E2  
ctg511□ctg1331□ctg1503□WAG-31M5  
ctg511□ctg1331□ctg1503□WAG-50O17  
ctg511□ctg1331□ctg1503□WAG-55F13  
ctg511□ctg1331□ctg1503□WAG-110B20  
ctg511□ctg1331□ctg5760□WAG-48K18  
ctg511□ctg1331□ctg5760□WAG-125H6  
ctg5110□□□WAG-96A23  
ctg5110□ctg223□ctg241□WAG-1O24  
ctg5110□ctg223□ctg241□WAG-14C1  
ctg5110□ctg223□ctg241□WAG-29G13  
ctg5110□ctg223□ctg241□WAG-29O17  
ctg5110□ctg223□ctg241□WAG-54M6  
ctg5110□ctg223□ctg241□WAG-57O2  
ctg5110□ctg223□ctg241□WAG-60A21  
ctg5110□ctg223□ctg241□WAG-82D23  
ctg5110□ctg223□ctg241□WAG-106I9  
ctg5110□ctg223□ctg241□WAG-115B24  
ctg5110□ctg223□ctg241□WAG-117F5  
ctg5110□ctg223□ctg241□WAG-125F11  
ctg5111□□□WAG-8D6

ctg5111□□□WAG-78L24  
ctg5111□ctg459□□WAG-22P3  
ctg5111□ctg459□□WAG-52O10  
ctg5111□ctg459□□WAG-56P14  
ctg5111□ctg459□ctg1050□WAG-21I19  
ctg5111□ctg459□ctg1050□WAG-23H23  
ctg5111□ctg459□ctg1050□WAG-25F4  
ctg5111□ctg459□ctg1050□WAG-42G18  
ctg5111□ctg459□ctg1050□WAG-62D21  
ctg5111□ctg459□ctg1050□WAG-67B14  
ctg5111□ctg459□ctg1050□WAG-76B21  
ctg5111□ctg459□ctg1050□WAG-80K8  
ctg5111□ctg459□ctg1050□WAG-94D24  
ctg5111□ctg459□ctg1050□WAG-97K1  
ctg5111□ctg459□ctg1050□WAG-100A6  
ctg5111□ctg459□ctg1050□WAG-105F21  
ctg5111□ctg459□ctg1050□WAG-106E15  
ctg5111□ctg459□ctg1050□WAG-122P22  
ctg5111□ctg459□ctg1050□WAG-124G8  
ctg5111□ctg459□ctg1050□WAG-128N13  
ctg5112□ctg2656□ctg2624□WAG-73K24  
ctg5112□ctg2656□ctg2624□WAG-93L12  
ctg5112□ctg2656□ctg2624□WAG-130K23  
ctg5113□ctg5002□ctg5457□WAG-60P17  
ctg5113□ctg5002□ctg5457□WAG-64O13  
ctg5114□ctg536□ctg529□WAG-4D24  
ctg5114□ctg536□ctg529□WAG-16G23  
ctg5114□ctg536□ctg529□WAG-28O3  
ctg5114□ctg536□ctg529□WAG-50O2  
ctg5114□ctg536□ctg529□WAG-61A7  
ctg5114□ctg536□ctg529□WAG-68N20  
ctg5114□ctg536□ctg529□WAG-76J21  
ctg5114□ctg536□ctg529□WAG-81A21  
ctg5114□ctg536□ctg529□WAG-92L8  
ctg5114□ctg536□ctg529□WAG-112H21  
ctg5115□ctg796□□WAG-20P18  
ctg5115□ctg796□□WAG-59H22  
ctg5115□ctg796□□WAG-104P3  
ctg5115□ctg796□ctg1358□WAG-10L7  
ctg5115□ctg796□ctg1358□WAG-45C9  
ctg5115□ctg796□ctg1358□WAG-46O21  
ctg5115□ctg796□ctg1358□WAG-53C18  
ctg5115□ctg796□ctg1358□WAG-75I16  
ctg5115□ctg796□ctg1358□WAG-77C15  
ctg5115□ctg796□ctg1358□WAG-128G10  
ctg5116□ctg2971□□WAG-64N23  
ctg5116□ctg2971□□WAG-118J19  
ctg5116□ctg2971□ctg2957□WAG-55M6  
ctg5116□ctg2971□ctg2957□WAG-87C9  
ctg5116□ctg2971□ctg2957□WAG-125D14  
ctg5117□ctg6591□ctg1584□WAG-1F14  
ctg5117□ctg6591□ctg1584□WAG-4N23  
ctg5117□ctg6591□ctg1584□WAG-14E8  
ctg5117□ctg6591□ctg1584□WAG-56G10  
ctg5117□ctg6591□ctg1584□WAG-72H24  
ctg5118□ctg653□ctg531□WAG-50H19

ctg5118□ctg653□ctg531□WAG-52C3  
ctg5118□ctg653□ctg531□WAG-56A7  
ctg5118□ctg653□ctg531□WAG-75K18  
ctg5119□□□WAG-31D17  
ctg5119□ctg5869□ctg6938□WAG-46F24  
ctg5119□ctg5869□ctg6938□WAG-66O5  
ctg512□ctg1333□□WAG-21N20  
ctg512□ctg1333□□WAG-130F15  
ctg512□ctg1333□ctg1495□WAG-15A1  
ctg512□ctg1333□ctg1495□WAG-109B19  
ctg512□ctg1333□ctg1495□WAG-126K15  
ctg512□ctg1333□ctg1495□WAG-129D18  
ctg512□ctg1333□ctg5598□WAG-28B18  
ctg512□ctg1333□ctg5598□WAG-94G6  
ctg5120□□□WAG-4A2  
ctg5120□□□WAG-29N5  
ctg5120□ctg2680□□WAG-9P3  
ctg5120□ctg2680□ctg3318□WAG-51K7  
ctg5120□ctg2680□ctg3318□WAG-60J24  
ctg5120□ctg2680□ctg3318□WAG-80H21  
ctg5120□ctg5193□ctg5906□WAG-87I17  
ctg5120□ctg5193□ctg5906□WAG-109L1  
ctg5121□ctg2358□□WAG-65O22  
ctg5121□ctg2358□□WAG-95N17  
ctg5121□ctg2358□ctg2938□WAG-38H24  
ctg5121□ctg2358□ctg2938□WAG-70G1  
ctg5121□ctg2358□ctg2938□WAG-88H12  
ctg5121□ctg2358□ctg2938□WAG-100P1  
ctg5121□ctg2663□□WAG-88B12  
ctg5121□ctg2663□□WAG-102P22  
ctg5121□ctg2663□□WAG-116C13  
ctg5121□ctg2663□□WAG-130A2  
ctg5121□ctg2663□ctg3507□WAG-22N15  
ctg5121□ctg2663□ctg3507□WAG-55N6  
ctg5121□ctg2663□ctg3507□WAG-100M20  
ctg5121□ctg2663□ctg4407□WAG-86K2  
ctg5121□ctg2663□ctg4407□WAG-103I18  
ctg5121□ctg5300□ctg6146□WAG-15J21  
ctg5121□ctg5300□ctg6146□WAG-106P4  
ctg5122□□□WAG-5L8  
ctg5122□ctg26□□WAG-48P16  
ctg5122□ctg26□□WAG-114G9  
ctg5122□ctg26□ctg23□WAG-8L9  
ctg5122□ctg26□ctg23□WAG-9A13  
ctg5122□ctg26□ctg23□WAG-12K11  
ctg5122□ctg26□ctg23□WAG-15I5  
ctg5122□ctg26□ctg23□WAG-15P4  
ctg5122□ctg26□ctg23□WAG-29A9  
ctg5122□ctg26□ctg23□WAG-33H5  
ctg5122□ctg26□ctg23□WAG-33L5  
ctg5122□ctg26□ctg23□WAG-34M12  
ctg5122□ctg26□ctg23□WAG-36P5  
ctg5122□ctg26□ctg23□WAG-39H10  
ctg5122□ctg26□ctg23□WAG-39H19  
ctg5122□ctg26□ctg23□WAG-44C13  
ctg5122□ctg26□ctg23□WAG-45F2

ctg5122□ctg26□ctg23□WAG-50K18  
ctg5122□ctg26□ctg23□WAG-56C22  
ctg5122□ctg26□ctg23□WAG-76B23  
ctg5122□ctg26□ctg23□WAG-79M10  
ctg5122□ctg26□ctg23□WAG-88J14  
ctg5122□ctg26□ctg23□WAG-94J16  
ctg5122□ctg26□ctg23□WAG-109N1  
ctg5122□ctg26□ctg23□WAG-110C3  
ctg5122□ctg26□ctg23□WAG-116E14  
ctg5122□ctg26□ctg23□WAG-120D20  
ctg5122□ctg26□ctg23□WAG-121K17  
ctg5122□ctg354□□WAG-28O10  
ctg5122□ctg354□□WAG-73L20  
ctg5122□ctg354□ctg451□WAG-10M8  
ctg5122□ctg354□ctg451□WAG-22O24  
ctg5122□ctg354□ctg451□WAG-23C1  
ctg5122□ctg354□ctg451□WAG-43L17  
ctg5122□ctg354□ctg451□WAG-53M1  
ctg5122□ctg354□ctg451□WAG-55M7  
ctg5122□ctg354□ctg451□WAG-60L17  
ctg5122□ctg354□ctg451□WAG-73K5  
ctg5122□ctg354□ctg451□WAG-83H11  
ctg5122□ctg354□ctg451□WAG-83I21  
ctg5122□ctg354□ctg451□WAG-87G3  
ctg5122□ctg354□ctg451□WAG-91O11  
ctg5122□ctg354□ctg451□WAG-96I23  
ctg5122□ctg354□ctg451□WAG-96O16  
ctg5122□ctg354□ctg451□WAG-113P19  
ctg5122□ctg354□ctg451□WAG-126L8  
ctg5123□ctg4211□□WAG-47D13  
ctg5123□ctg4211□□WAG-74O11  
ctg5123□ctg4211□□WAG-117A18  
ctg5123□ctg6045□□WAG-23F2  
ctg5123□ctg6045□□WAG-115E15  
ctg5124□□□WAG-7I21  
ctg5124□ctg15□□WAG-45D6  
ctg5124□ctg15□ctg15□WAG-4G18  
ctg5124□ctg15□ctg15□WAG-7E24  
ctg5124□ctg15□ctg15□WAG-11F7  
ctg5124□ctg15□ctg15□WAG-14L21  
ctg5124□ctg15□ctg15□WAG-17H3  
ctg5124□ctg15□ctg15□WAG-25F12  
ctg5124□ctg15□ctg15□WAG-32G20  
ctg5124□ctg15□ctg15□WAG-33F17  
ctg5124□ctg15□ctg15□WAG-66K24  
ctg5124□ctg15□ctg15□WAG-67I14  
ctg5124□ctg15□ctg15□WAG-75A18  
ctg5124□ctg15□ctg15□WAG-76B13  
ctg5124□ctg15□ctg15□WAG-80B24  
ctg5124□ctg15□ctg15□WAG-81C24  
ctg5124□ctg15□ctg15□WAG-82H16  
ctg5124□ctg15□ctg15□WAG-85J3  
ctg5124□ctg15□ctg15□WAG-86N1  
ctg5124□ctg15□ctg15□WAG-107K9  
ctg5124□ctg15□ctg15□WAG-109J19  
ctg5124□ctg15□ctg15□WAG-111H9

ctg5124□ctg15□ctg15□WAG-120N9  
ctg5124□ctg15□ctg15□WAG-127H7  
ctg5124□ctg15□ctg214□WAG-18E4  
ctg5124□ctg15□ctg214□WAG-42A24  
ctg5124□ctg15□ctg214□WAG-57F9  
ctg5124□ctg15□ctg214□WAG-60G3  
ctg5124□ctg15□ctg214□WAG-85B2  
ctg5124□ctg15□ctg214□WAG-98C9  
ctg5124□ctg15□ctg214□WAG-102G19  
ctg5124□ctg15□ctg214□WAG-118H18  
ctg5124□ctg15□ctg214□WAG-119P8  
ctg5124□ctg15□ctg214□WAG-122O11  
ctg5125□□□WAG-61H10  
ctg5125□□□WAG-91O9  
ctg5125□ctg1374□ctg1213□WAG-18D5  
ctg5125□ctg1374□ctg1213□WAG-32I19  
ctg5125□ctg1374□ctg1213□WAG-95M5  
ctg5125□ctg1374□ctg1213□WAG-98G11  
ctg5125□ctg1374□ctg1213□WAG-117I14  
ctg5126□ctg3930□□WAG-46H11  
ctg5126□ctg3930□□WAG-52P21  
ctg5126□ctg3930□ctg5713□WAG-96I13  
ctg5126□ctg3930□ctg5713□WAG-107J5  
ctg5127□□□WAG-121P22  
ctg5127□ctg163□□WAG-27I23  
ctg5127□ctg163□ctg397□WAG-7F1  
ctg5127□ctg163□ctg397□WAG-17C21  
ctg5127□ctg163□ctg397□WAG-20A7  
ctg5127□ctg163□ctg397□WAG-32E13  
ctg5127□ctg163□ctg397□WAG-38B2  
ctg5127□ctg163□ctg397□WAG-42E2  
ctg5127□ctg163□ctg397□WAG-47B8  
ctg5127□ctg163□ctg397□WAG-48B21  
ctg5127□ctg163□ctg397□WAG-50E2  
ctg5127□ctg163□ctg397□WAG-51G23  
ctg5127□ctg163□ctg397□WAG-65F2  
ctg5127□ctg163□ctg397□WAG-74M14  
ctg5127□ctg163□ctg397□WAG-77L4  
ctg5127□ctg163□ctg397□WAG-84F18  
ctg5127□ctg163□ctg397□WAG-91E18  
ctg5127□ctg163□ctg397□WAG-91K13  
ctg5127□ctg163□ctg397□WAG-92E16  
ctg5127□ctg163□ctg397□WAG-107P10  
ctg5127□ctg163□ctg397□WAG-112K13  
ctg5127□ctg163□ctg397□WAG-127C9  
ctg5127□ctg441□□WAG-19L22  
ctg5127□ctg441□□WAG-20B8  
ctg5127□ctg441□□WAG-71F12  
ctg5127□ctg441□ctg468□WAG-42I9  
ctg5127□ctg441□ctg468□WAG-49E2  
ctg5127□ctg441□ctg468□WAG-62A21  
ctg5127□ctg441□ctg468□WAG-68E6  
ctg5127□ctg441□ctg468□WAG-72P6  
ctg5127□ctg441□ctg468□WAG-80L9  
ctg5127□ctg441□ctg468□WAG-81F19  
ctg5127□ctg441□ctg468□WAG-97P13



ctg5127□ctg441□ctg468□WAG-107H22  
ctg5127□ctg441□ctg468□WAG-114J15  
ctg5127□ctg441□ctg468□WAG-118C15  
ctg5127□ctg441□ctg6733□WAG-2C4  
ctg5127□ctg441□ctg6733□WAG-103N18  
ctg5128□□□WAG-14P16  
ctg5128□ctg3436□ctg3552□WAG-3D1  
ctg5128□ctg3436□ctg3552□WAG-3E5  
ctg5128□ctg721□□□WAG-116F13  
ctg5128□ctg721□ctg1095□WAG-19L15  
ctg5128□ctg721□ctg1095□WAG-27E20  
ctg5128□ctg721□ctg1095□WAG-29E1  
ctg5128□ctg721□ctg1095□WAG-42F20  
ctg5128□ctg721□ctg1095□WAG-43C18  
ctg5128□ctg721□ctg1095□WAG-46A10  
ctg5128□ctg721□ctg1095□WAG-59E16  
ctg5128□ctg721□ctg1095□WAG-62H8  
ctg5128□ctg721□ctg1095□WAG-74F9  
ctg5128□ctg721□ctg1095□WAG-79N19  
ctg5128□ctg721□ctg1095□WAG-83B14  
ctg5128□ctg721□ctg1095□WAG-97A10  
ctg5128□ctg721□ctg1095□WAG-99G8  
ctg5128□ctg721□ctg1095□WAG-102O3  
ctg5128□ctg721□ctg1095□WAG-120L6  
ctg5128□ctg721□ctg1095□WAG-121D18  
ctg5128□ctg721□ctg1095□WAG-122E4  
ctg5128□ctg721□ctg1095□WAG-129N17  
ctg5128□ctg721□ctg4767□WAG-66B22  
ctg5128□ctg721□ctg4767□WAG-116G6  
ctg5129□ctg1148□□□WAG-38H3  
ctg5129□ctg1148□□□WAG-69D11  
ctg5129□ctg1148□ctg1327□WAG-14P7  
ctg5129□ctg1148□ctg1327□WAG-18F4  
ctg5129□ctg1148□ctg1327□WAG-19A1  
ctg5129□ctg1148□ctg1327□WAG-69I5  
ctg5129□ctg1148□ctg1327□WAG-85P4  
ctg5129□ctg1148□ctg1327□WAG-120G4  
ctg5129□ctg1148□ctg2787□WAG-3M9  
ctg5129□ctg1148□ctg2787□WAG-79F9  
ctg5129□ctg1148□ctg2787□WAG-128M13  
ctg5129□ctg1148□ctg2787□WAG-130G7  
ctg513□ctg1139□□□WAG-66K12  
ctg513□ctg1139□ctg1266□WAG-10C23  
ctg513□ctg1139□ctg1266□WAG-40F24  
ctg513□ctg1139□ctg1266□WAG-62P20  
ctg513□ctg1139□ctg1266□WAG-72C14  
ctg513□ctg1139□ctg1266□WAG-83K4  
ctg513□ctg1139□ctg1266□WAG-90N3  
ctg513□ctg4077□ctg4357□WAG-1G8  
ctg513□ctg4077□ctg4357□WAG-63B21  
ctg513□ctg4077□ctg4357□WAG-67C2  
ctg5130□ctg5231□ctg6000□WAG-46E9  
ctg5130□ctg5231□ctg6000□WAG-117B21  
ctg5130□ctg6187□□□WAG-50P18  
ctg5130□ctg6187□□□WAG-73C7  
ctg5131□□□WAG-30G10

ctg5131□□□WAG-78F7  
ctg5131□ctg1042□□WAG-17F17  
ctg5131□ctg1042□□WAG-120M15  
ctg5131□ctg1042□ctg1160□WAG-40C14  
ctg5131□ctg1042□ctg1160□WAG-67M19  
ctg5131□ctg1042□ctg1160□WAG-107H15  
ctg5131□ctg4243□ctg4442□WAG-32C14  
ctg5131□ctg4243□ctg4442□WAG-129I17  
ctg5131□ctg852□ctg1161□WAG-20K13  
ctg5131□ctg852□ctg1161□WAG-23I15  
ctg5131□ctg852□ctg1161□WAG-33M21  
ctg5131□ctg852□ctg1161□WAG-55M9  
ctg5131□ctg852□ctg1161□WAG-76K22  
ctg5131□ctg852□ctg1161□WAG-106C19  
ctg5131□ctg852□ctg1161□WAG-129F21  
ctg5132□ctg1905□□WAG-35H10  
ctg5132□ctg1905□□WAG-74D3  
ctg5132□ctg1905□ctg2261□WAG-49O14  
ctg5132□ctg1905□ctg2261□WAG-83O10  
ctg5132□ctg1905□ctg2261□WAG-130P8  
ctg5132□ctg1905□ctg4333□WAG-68J22  
ctg5132□ctg1905□ctg4333□WAG-81M3  
ctg5132□ctg1905□ctg4333□WAG-112B2  
ctg5133□□□WAG-51F19  
ctg5133□ctg280□□WAG-117N22  
ctg5133□ctg280□□WAG-119D22  
ctg5133□ctg280□ctg4553□WAG-97E13  
ctg5133□ctg280□ctg4553□WAG-109I17  
ctg5133□ctg280□ctg588□WAG-24N15  
ctg5133□ctg280□ctg588□WAG-26A21  
ctg5133□ctg280□ctg588□WAG-44M23  
ctg5133□ctg280□ctg588□WAG-46I18  
ctg5133□ctg280□ctg588□WAG-48E20  
ctg5133□ctg280□ctg588□WAG-55M14  
ctg5133□ctg280□ctg588□WAG-58L15  
ctg5133□ctg280□ctg588□WAG-66L2  
ctg5133□ctg280□ctg588□WAG-66O11  
ctg5133□ctg280□ctg588□WAG-79A17  
ctg5133□ctg280□ctg588□WAG-100O18  
ctg5133□ctg280□ctg588□WAG-104A14  
ctg5134□ctg3189□ctg5333□WAG-99D7  
ctg5134□ctg3189□ctg5333□WAG-112H10  
ctg5134□ctg3189□ctg6417□WAG-16H14  
ctg5134□ctg3189□ctg6417□WAG-46M22  
ctg5135□ctg6587□□WAG-64I19  
ctg5135□ctg6587□□WAG-114F2  
ctg5136□ctg4637□□WAG-60K9  
ctg5136□ctg4637□□WAG-80B16  
ctg5136□ctg4637□□WAG-130P23  
ctg5137□ctg4428□□WAG-32J20  
ctg5137□ctg4428□□WAG-116N5  
ctg5137□ctg4428□ctg6769□WAG-33I4  
ctg5137□ctg4428□ctg6769□WAG-98G8  
ctg5138□ctg1862□□WAG-31C20  
ctg5138□ctg1862□ctg1694□WAG-14A2  
ctg5138□ctg1862□ctg1694□WAG-64G15

ctg5138□ctg1862□ctg1694□WAG-70J19  
ctg5138□ctg1862□ctg1694□WAG-79F6  
ctg5138□ctg1862□ctg1694□WAG-90B17  
ctg5138□ctg1862□ctg1694□WAG-128I24  
ctg5138□ctg700□ctg718□WAG-13I10  
ctg5138□ctg700□ctg718□WAG-51N21  
ctg5138□ctg700□ctg718□WAG-68D6  
ctg5138□ctg700□ctg718□WAG-89N11  
ctg5138□ctg700□ctg718□WAG-90B7  
ctg5138□ctg700□ctg718□WAG-90O11  
ctg5138□ctg700□ctg718□WAG-99J16  
ctg5138□ctg700□ctg718□WAG-120C5  
ctg5139□□□WAG-11J19  
ctg5139□□□WAG-129A5  
ctg5139□ctg4241□□WAG-100H11  
ctg5139□ctg4241□ctg6168□WAG-49B7  
ctg5139□ctg4241□ctg6168□WAG-59I13  
ctg514□ctg1140□ctg1268□WAG-10A13  
ctg514□ctg1140□ctg1268□WAG-23C7  
ctg514□ctg1140□ctg1268□WAG-35B23  
ctg514□ctg1140□ctg1268□WAG-38O20  
ctg514□ctg1140□ctg1268□WAG-110I12  
ctg5140□ctg5329□ctg6223□WAG-21N11  
ctg5140□ctg5329□ctg6223□WAG-55E11  
ctg5141□□□WAG-24K7  
ctg5141□ctg3378□□WAG-33C21  
ctg5141□ctg3378□□WAG-82B3  
ctg5141□ctg3378□□WAG-101N15  
ctg5141□ctg3378□ctg4353□WAG-40G22  
ctg5141□ctg3378□ctg4353□WAG-107B6  
ctg5141□ctg3378□ctg4353□WAG-115P8  
ctg5142□ctg237□□WAG-10C9  
ctg5142□ctg237□□WAG-32L11  
ctg5142□ctg237□□WAG-43D22  
ctg5142□ctg237□□WAG-48L20  
ctg5142□ctg237□ctg2548□WAG-6I3  
ctg5142□ctg237□ctg2548□WAG-22C23  
ctg5142□ctg237□ctg2548□WAG-130D2  
ctg5142□ctg237□ctg399□WAG-2P12  
ctg5142□ctg237□ctg399□WAG-8K13  
ctg5142□ctg237□ctg399□WAG-15E23  
ctg5142□ctg237□ctg399□WAG-22D23  
ctg5142□ctg237□ctg399□WAG-50K8  
ctg5142□ctg237□ctg399□WAG-55H3  
ctg5142□ctg237□ctg399□WAG-68C14  
ctg5142□ctg237□ctg399□WAG-79C5  
ctg5142□ctg237□ctg399□WAG-84I14  
ctg5142□ctg237□ctg399□WAG-97I4  
ctg5142□ctg237□ctg399□WAG-111O10  
ctg5142□ctg237□ctg399□WAG-111O18  
ctg5142□ctg237□ctg399□WAG-114J20  
ctg5142□ctg237□ctg399□WAG-128A15  
ctg5142□ctg237□ctg519□WAG-9D14  
ctg5142□ctg237□ctg519□WAG-19O4  
ctg5142□ctg237□ctg519□WAG-58A16  
ctg5142□ctg237□ctg519□WAG-78N8

ctg5142□ctg237□ctg519□WAG-100K15  
ctg5142□ctg237□ctg519□WAG-102A22  
ctg5142□ctg237□ctg519□WAG-108F15  
ctg5142□ctg237□ctg519□WAG-108F17  
ctg5142□ctg237□ctg519□WAG-112N9  
ctg5142□ctg237□ctg519□WAG-113B4  
ctg5142□ctg237□ctg519□WAG-116J20  
ctg5142□ctg237□ctg519□WAG-122B24  
ctg5142□ctg237□ctg519□WAG-126M18  
ctg5142□ctg237□ctg5213□WAG-60C5  
ctg5142□ctg237□ctg5213□WAG-102D12  
ctg5143□□□WAG-126B2  
ctg5143□ctg3649□ctg3837□WAG-23C2  
ctg5143□ctg3649□ctg3837□WAG-89P22  
ctg5143□ctg3649□ctg3837□WAG-122K5  
ctg5144□□□WAG-75G3  
ctg5144□□□WAG-123F8  
ctg5144□ctg1540□□WAG-1G6  
ctg5144□ctg1540□□WAG-18L11  
ctg5144□ctg1540□□WAG-29A22  
ctg5144□ctg1540□□WAG-35K9  
ctg5144□ctg1540□□WAG-38G18  
ctg5144□ctg1540□□WAG-39I4  
ctg5144□ctg1540□□WAG-80K15  
ctg5144□ctg1540□□WAG-97D22  
ctg5144□ctg1540□□WAG-100G4  
ctg5144□ctg1540□ctg1745□WAG-10M6  
ctg5144□ctg1540□ctg1745□WAG-57I1  
ctg5144□ctg1540□ctg1745□WAG-95I15  
ctg5144□ctg1540□ctg1745□WAG-111D16  
ctg5144□ctg1540□ctg1745□WAG-117L10  
ctg5144□ctg1540□ctg2236□WAG-9I10  
ctg5144□ctg1540□ctg2236□WAG-71K20  
ctg5144□ctg1540□ctg2236□WAG-106I13  
ctg5144□ctg1540□ctg2236□WAG-117O18  
ctg5144□ctg1540□ctg4000□WAG-5J12  
ctg5144□ctg1540□ctg4000□WAG-7H6  
ctg5144□ctg1540□ctg4000□WAG-52L10  
ctg5144□ctg1540□ctg4000□WAG-127D7  
ctg5144□ctg1540□ctg4949□WAG-88N19  
ctg5144□ctg1540□ctg4949□WAG-126N10  
ctg5144□ctg1540□ctg6027□WAG-58C19  
ctg5144□ctg1540□ctg6027□WAG-91G21  
ctg5145□ctg4556□□WAG-9F2  
ctg5145□ctg4556□□WAG-77I19  
ctg5145□ctg4556□□WAG-94K23  
ctg5146□□□WAG-10H6  
ctg5146□□□WAG-43I16  
ctg5146□□□WAG-51F22  
ctg5146□□□WAG-87J23  
ctg5146□ctg6580□□WAG-47B19  
ctg5146□ctg6580□□WAG-118A5  
ctg5146□ctg6580□ctg11□WAG-1L14  
ctg5146□ctg6580□ctg11□WAG-14G19  
ctg5146□ctg6580□ctg11□WAG-21P8  
ctg5146□ctg6580□ctg11□WAG-50I1

ctg5146□ctg6580□ctg11□WAG-57L13  
ctg5146□ctg6580□ctg11□WAG-57M9  
ctg5146□ctg6580□ctg11□WAG-69J5  
ctg5146□ctg6580□ctg11□WAG-74H1  
ctg5146□ctg6580□ctg11□WAG-101B12  
ctg5146□ctg6580□ctg11□WAG-106J10  
ctg5146□ctg6580□ctg990□WAG-12M12  
ctg5146□ctg6580□ctg990□WAG-18J9  
ctg5146□ctg6580□ctg990□WAG-28C4  
ctg5146□ctg6580□ctg990□WAG-38N5  
ctg5146□ctg6580□ctg990□WAG-40B6  
ctg5146□ctg6580□ctg990□WAG-55B2  
ctg5146□ctg6580□ctg990□WAG-64E13  
ctg5146□ctg6580□ctg990□WAG-69G23  
ctg5146□ctg6580□ctg990□WAG-86C17  
ctg5146□ctg6580□ctg990□WAG-95G5  
ctg5146□ctg6580□ctg990□WAG-99I12  
ctg5146□ctg6580□ctg990□WAG-101C16  
ctg5146□ctg6580□ctg990□WAG-102B23  
ctg5146□ctg6580□ctg990□WAG-111K4  
ctg5146□ctg6580□ctg990□WAG-121N24  
ctg5146□ctg6580□ctg990□WAG-126C9  
ctg5146□ctg6580□ctg990□WAG-126E6  
ctg5146□ctg6580□ctg990□WAG-126J23  
ctg5147□ctg81□□WAG-7B4  
ctg5147□ctg81□□WAG-55L1  
ctg5147□ctg81□□WAG-79F7  
ctg5147□ctg81□□WAG-119M14  
ctg5147□ctg81□ctg2884□WAG-86E21  
ctg5147□ctg81□ctg2884□WAG-90N23  
ctg5147□ctg81□ctg2884□WAG-93E7  
ctg5147□ctg81□ctg61□WAG-5P5  
ctg5147□ctg81□ctg61□WAG-22O4  
ctg5147□ctg81□ctg61□WAG-25H16  
ctg5147□ctg81□ctg61□WAG-26G2  
ctg5147□ctg81□ctg61□WAG-27O6  
ctg5147□ctg81□ctg61□WAG-29A24  
ctg5147□ctg81□ctg61□WAG-46G13  
ctg5147□ctg81□ctg61□WAG-47E19  
ctg5147□ctg81□ctg61□WAG-82I3  
ctg5147□ctg81□ctg61□WAG-107D1  
ctg5147□ctg81□ctg61□WAG-117D15  
ctg5147□ctg81□ctg61□WAG-121G6  
ctg5147□ctg81□ctg61□WAG-123E22  
ctg5147□ctg81□ctg61□WAG-126C16  
ctg5147□ctg81□ctg61□WAG-128P22  
ctg5147□ctg81□ctg61□WAG-130E14  
ctg5148□ctg180□□WAG-94P24  
ctg5148□ctg180□ctg150□WAG-5E12  
ctg5148□ctg180□ctg150□WAG-27L23  
ctg5148□ctg180□ctg150□WAG-38O19  
ctg5148□ctg180□ctg150□WAG-67P21  
ctg5148□ctg180□ctg150□WAG-90E14  
ctg5148□ctg180□ctg150□WAG-106J17  
ctg5148□ctg180□ctg150□WAG-111E9  
ctg5148□ctg180□ctg150□WAG-111F8

ctg5148□ctg180□ctg150□WAG-111G8  
ctg5148□ctg180□ctg150□WAG-122P12  
ctg5148□ctg180□ctg1597□WAG-12J22  
ctg5148□ctg180□ctg1597□WAG-31L3  
ctg5148□ctg180□ctg1597□WAG-51G7  
ctg5148□ctg180□ctg1597□WAG-71C18  
ctg5148□ctg180□ctg1597□WAG-76O8  
ctg5148□ctg180□ctg1597□WAG-84F19  
ctg5148□ctg180□ctg1597□WAG-88D5  
ctg5148□ctg180□ctg1597□WAG-98H14  
ctg5148□ctg180□ctg1597□WAG-109O9  
ctg5148□ctg255□□WAG-124G2  
ctg5148□ctg255□ctg292□WAG-11C5  
ctg5148□ctg255□ctg292□WAG-16O21  
ctg5148□ctg255□ctg292□WAG-33M20  
ctg5148□ctg255□ctg292□WAG-37D13  
ctg5148□ctg255□ctg292□WAG-40D8  
ctg5148□ctg255□ctg292□WAG-45K16  
ctg5148□ctg255□ctg292□WAG-49A23  
ctg5148□ctg255□ctg292□WAG-50K12  
ctg5148□ctg255□ctg292□WAG-68D15  
ctg5148□ctg255□ctg292□WAG-72C21  
ctg5148□ctg255□ctg292□WAG-74I23  
ctg5148□ctg255□ctg292□WAG-108F12  
ctg5148□ctg255□ctg292□WAG-121M1  
ctg5148□ctg255□ctg6809□WAG-1D7  
ctg5148□ctg255□ctg6809□WAG-1O12  
ctg5148□ctg255□ctg695□WAG-33C12  
ctg5148□ctg255□ctg695□WAG-63M24  
ctg5148□ctg255□ctg695□WAG-67O5  
ctg5148□ctg255□ctg695□WAG-76I12  
ctg5148□ctg255□ctg695□WAG-81B16  
ctg5148□ctg255□ctg695□WAG-94L4  
ctg5148□ctg255□ctg695□WAG-95K23  
ctg5148□ctg255□ctg695□WAG-103D17  
ctg5148□ctg255□ctg695□WAG-130K21  
ctg5149□ctg6596□ctg45□WAG-25I20  
ctg5149□ctg6596□ctg45□WAG-29A13  
ctg5149□ctg6596□ctg45□WAG-30B4  
ctg5149□ctg6596□ctg45□WAG-30B6  
ctg5149□ctg6596□ctg45□WAG-44J8  
ctg5149□ctg6596□ctg45□WAG-45O17  
ctg5149□ctg6596□ctg45□WAG-108I1  
ctg5149□ctg6596□ctg45□WAG-108K14  
ctg5149□ctg6596□ctg45□WAG-115E6  
ctg5149□ctg6596□ctg45□WAG-121O24  
ctg5149□ctg6596□ctg45□WAG-122C22  
ctg515□□□WAG-4N7  
ctg515□ctg1341□□WAG-25B17  
ctg515□ctg1341□ctg1931□WAG-12H10  
ctg515□ctg1341□ctg1931□WAG-126I9  
ctg515□ctg1341□ctg1931□WAG-129G8  
ctg515□ctg1341□ctg4822□WAG-49O17  
ctg515□ctg1341□ctg4822□WAG-54K11  
ctg515□ctg1341□ctg6268□WAG-62K6  
ctg515□ctg1341□ctg6268□WAG-78F2

ctg5150□□□WAG-50E16  
ctg5150□ctg2448□ctg2373□WAG-50I6  
ctg5150□ctg2448□ctg2373□WAG-43N18  
ctg5150□ctg2448□ctg2373□WAG-74B4  
ctg5150□ctg2448□ctg2373□WAG-76K3  
ctg5150□ctg2448□ctg2373□WAG-84O7  
ctg5151□□□WAG-121A2  
ctg5151□ctg1949□ctg2333□WAG-47O4  
ctg5151□ctg1949□ctg2333□WAG-89P17  
ctg5151□ctg1949□ctg2333□WAG-112G16  
ctg5151□ctg1949□ctg5561□WAG-41B4  
ctg5151□ctg1949□ctg5561□WAG-102D22  
ctg5151□ctg2762□□□WAG-16D11  
ctg5151□ctg2762□□□WAG-16N13  
ctg5151□ctg2762□□□WAG-95F19  
ctg5151□ctg2762□□□WAG-96A6  
ctg5151□ctg2762□□□WAG-122E21  
ctg5151□ctg2762□ctg4615□WAG-74C10  
ctg5151□ctg2762□ctg4615□WAG-113J10  
ctg5152□□□WAG-36G3  
ctg5152□□□WAG-51D9  
ctg5152□□□WAG-92H21  
ctg5152□ctg272□□□WAG-22E13  
ctg5152□ctg272□□□WAG-22N13  
ctg5152□ctg272□□□WAG-29C9  
ctg5152□ctg272□□□WAG-33L11  
ctg5152□ctg272□□□WAG-97N7  
ctg5152□ctg272□□□WAG-99D8  
ctg5152□ctg272□ctg1105□WAG-29L6  
ctg5152□ctg272□ctg1105□WAG-61D7  
ctg5152□ctg272□ctg1105□WAG-66C8  
ctg5152□ctg272□ctg1105□WAG-66K17  
ctg5152□ctg272□ctg1105□WAG-80E23  
ctg5152□ctg272□ctg1105□WAG-100B22  
ctg5152□ctg272□ctg390□WAG-29F19  
ctg5152□ctg272□ctg390□WAG-30P4  
ctg5152□ctg272□ctg390□WAG-30P6  
ctg5152□ctg272□ctg390□WAG-38D7  
ctg5152□ctg272□ctg390□WAG-45K2  
ctg5152□ctg272□ctg390□WAG-55K18  
ctg5152□ctg272□ctg390□WAG-61A3  
ctg5152□ctg272□ctg390□WAG-63O22  
ctg5152□ctg272□ctg390□WAG-65L15  
ctg5152□ctg272□ctg390□WAG-77D18  
ctg5152□ctg272□ctg390□WAG-77P16  
ctg5152□ctg272□ctg390□WAG-98O5  
ctg5152□ctg272□ctg390□WAG-102L4  
ctg5152□ctg272□ctg390□WAG-113P7  
ctg5152□ctg272□ctg390□WAG-122G13  
ctg5152□ctg272□ctg390□WAG-126H1  
ctg5152□ctg272□ctg390□WAG-128P15  
ctg5152□ctg272□ctg390□WAG-129B4  
ctg5152□ctg272□ctg885□WAG-5G5  
ctg5152□ctg272□ctg885□WAG-5O20  
ctg5152□ctg272□ctg885□WAG-12L11  
ctg5152□ctg272□ctg885□WAG-30B10

ctg5152□ctg272□ctg885□WAG-30C4  
ctg5152□ctg272□ctg885□WAG-43M10  
ctg5152□ctg272□ctg885□WAG-46C13  
ctg5152□ctg272□ctg885□WAG-56P16  
ctg5152□ctg272□ctg885□WAG-57L7  
ctg5152□ctg272□ctg885□WAG-63G6  
ctg5152□ctg272□ctg885□WAG-73M18  
ctg5152□ctg272□ctg885□WAG-89A17  
ctg5153□□□WAG-76O4  
ctg5153□ctg4192□□WAG-26A13  
ctg5153□ctg4192□ctg6028□WAG-37K13  
ctg5153□ctg4192□ctg6028□WAG-54B1  
ctg5153□ctg6141□□WAG-40A19  
ctg5153□ctg6141□□WAG-59K1  
ctg5154□ctg4072□ctg4343□WAG-49P5  
ctg5154□ctg4072□ctg4343□WAG-98L15  
ctg5155□□□WAG-33L17  
ctg5155□□□WAG-105F4  
ctg5155□ctg383□□WAG-76C15  
ctg5155□ctg383□□WAG-126A21  
ctg5155□ctg383□ctg2063□WAG-14N19  
ctg5155□ctg383□ctg2063□WAG-50B21  
ctg5155□ctg383□ctg2063□WAG-65I14  
ctg5155□ctg383□ctg2063□WAG-89I15  
ctg5155□ctg383□ctg2063□WAG-101K2  
ctg5155□ctg383□ctg289□WAG-21B23  
ctg5155□ctg383□ctg289□WAG-28I20  
ctg5155□ctg383□ctg289□WAG-32H14  
ctg5155□ctg383□ctg289□WAG-41A22  
ctg5155□ctg383□ctg289□WAG-49D12  
ctg5155□ctg383□ctg289□WAG-50D13  
ctg5155□ctg383□ctg289□WAG-51D12  
ctg5155□ctg383□ctg289□WAG-57I22  
ctg5155□ctg383□ctg289□WAG-57K7  
ctg5155□ctg383□ctg289□WAG-85J8  
ctg5155□ctg383□ctg289□WAG-91M9  
ctg5155□ctg383□ctg289□WAG-101B3  
ctg5155□ctg383□ctg289□WAG-105J16  
ctg5155□ctg383□ctg289□WAG-120F15  
ctg5155□ctg383□ctg3232□WAG-19N11  
ctg5155□ctg383□ctg3232□WAG-33D2  
ctg5155□ctg383□ctg3232□WAG-90J12  
ctg5155□ctg5997□□WAG-76D12  
ctg5155□ctg5997□□WAG-121H16  
ctg5156□□□WAG-26I8  
ctg5156□ctg2403□ctg2300□WAG-21G5  
ctg5156□ctg2403□ctg2300□WAG-34J1  
ctg5156□ctg2403□ctg2300□WAG-98A2  
ctg5156□ctg2403□ctg2300□WAG-99L20  
ctg5156□ctg2403□ctg2300□WAG-112D2  
ctg5156□ctg2403□ctg2300□WAG-114O24  
ctg5156□ctg5603□□WAG-47P4  
ctg5156□ctg5603□□WAG-74L13  
ctg5157□ctg402□ctg415□WAG-12A3  
ctg5157□ctg402□ctg415□WAG-14A20  
ctg5157□ctg402□ctg415□WAG-20I5



ctg5157□ctg402□ctg415□WAG-33G18  
ctg5157□ctg402□ctg415□WAG-46E15  
ctg5157□ctg402□ctg415□WAG-106M14  
ctg5157□ctg402□ctg415□WAG-110B15  
ctg5157□ctg402□ctg415□WAG-115N15  
ctg5157□ctg402□ctg6046□WAG-11H9  
ctg5157□ctg402□ctg6046□WAG-29I2  
ctg5157□ctg4058□ctg4328□WAG-9F5  
ctg5157□ctg4058□ctg4328□WAG-42C14  
ctg5158□ctg2419□ctg2326□WAG-86H24  
ctg5158□ctg2419□ctg2326□WAG-97F20  
ctg5158□ctg2419□ctg2326□WAG-128J6  
ctg5159□□□WAG-11H14  
ctg5159□□□WAG-39H16  
ctg5159□□□WAG-63F12  
ctg5159□□□WAG-63K1  
ctg5159□□□WAG-113F21  
ctg5159□ctg557□□WAG-32M15  
ctg5159□ctg557□□WAG-129F8  
ctg5159□ctg557□ctg1239□WAG-9G1  
ctg5159□ctg557□ctg1239□WAG-16G9  
ctg5159□ctg557□ctg1239□WAG-16L18  
ctg5159□ctg557□ctg1239□WAG-16L20  
ctg5159□ctg557□ctg1239□WAG-81E22  
ctg5159□ctg557□ctg1239□WAG-83D5  
ctg5159□ctg557□ctg1239□WAG-85J9  
ctg5159□ctg557□ctg1239□WAG-96M4  
ctg516□□□WAG-1P18  
ctg516□□□WAG-9D8  
ctg516□□□WAG-23H2  
ctg516□ctg2914□□WAG-35D14  
ctg516□ctg2914□□WAG-55N12  
ctg516□ctg2914□ctg2895□WAG-12N23  
ctg516□ctg2914□ctg2895□WAG-37N3  
ctg516□ctg2914□ctg2895□WAG-130F13  
ctg516□ctg2914□ctg6371□WAG-89E2  
ctg516□ctg2914□ctg6371□WAG-107N20  
ctg516□ctg4099□□WAG-13F19  
ctg516□ctg4099□ctg6050□WAG-64B13  
ctg516□ctg4099□ctg6050□WAG-130N10  
ctg516□ctg5060□ctg5591□WAG-26B24  
ctg516□ctg5060□ctg5591□WAG-89H23  
ctg5160□□□WAG-16C5  
ctg5160□□□WAG-37L24  
ctg5160□□□WAG-91B21  
ctg5160□□□WAG-94C15  
ctg5160□ctg440□□WAG-14K5  
ctg5160□ctg440□□WAG-78G1  
ctg5160□ctg440□□WAG-107G12  
ctg5160□ctg440□ctg2592□WAG-5J14  
ctg5160□ctg440□ctg2592□WAG-50J21  
ctg5160□ctg440□ctg2592□WAG-65C19  
ctg5160□ctg440□ctg2592□WAG-118P12  
ctg5160□ctg440□ctg2736□WAG-39D18  
ctg5160□ctg440□ctg2736□WAG-66E5  
ctg5160□ctg440□ctg2736□WAG-98N20

ctg5160□ctg440□ctg600□WAG-15F4  
ctg5160□ctg440□ctg600□WAG-32I2  
ctg5160□ctg440□ctg600□WAG-38P11  
ctg5160□ctg440□ctg600□WAG-42L21  
ctg5160□ctg440□ctg600□WAG-44E6  
ctg5160□ctg440□ctg600□WAG-78N7  
ctg5160□ctg440□ctg600□WAG-84O16  
ctg5160□ctg440□ctg600□WAG-109H7  
ctg5160□ctg440□ctg680□WAG-27G24  
ctg5160□ctg440□ctg680□WAG-28J21  
ctg5160□ctg440□ctg680□WAG-36A13  
ctg5160□ctg440□ctg680□WAG-42I13  
ctg5160□ctg440□ctg680□WAG-44C7  
ctg5160□ctg440□ctg680□WAG-57L15  
ctg5160□ctg440□ctg680□WAG-65A22  
ctg5160□ctg440□ctg680□WAG-69P2  
ctg5160□ctg440□ctg680□WAG-78L17  
ctg5160□ctg440□ctg680□WAG-87J1  
ctg5160□ctg440□ctg680□WAG-88K21  
ctg5160□ctg440□ctg680□WAG-92K20  
ctg5160□ctg440□ctg680□WAG-113J1  
ctg5160□ctg440□ctg680□WAG-123K23  
ctg5160□ctg440□ctg680□WAG-124N21  
ctg5161□ctg4321□□WAG-5N12  
ctg5161□ctg4321□□WAG-50E17  
ctg5161□ctg4321□□WAG-130A5  
ctg5162□ctg5905□□WAG-34P8  
ctg5162□ctg5905□□WAG-84G5  
ctg5163□ctg6585□ctg477□WAG-10C18  
ctg5163□ctg6585□ctg477□WAG-33E13  
ctg5163□ctg6585□ctg477□WAG-33I14  
ctg5163□ctg6585□ctg477□WAG-44E4  
ctg5163□ctg6585□ctg477□WAG-128E10  
ctg5164□ctg1506□□WAG-87G23  
ctg5164□ctg1506□ctg1706□WAG-8J16  
ctg5164□ctg1506□ctg1706□WAG-10N3  
ctg5164□ctg1506□ctg1706□WAG-50J20  
ctg5164□ctg1506□ctg1706□WAG-58D15  
ctg5164□ctg1506□ctg1706□WAG-111B17  
ctg5165□ctg5283□ctg6117□WAG-9J7  
ctg5165□ctg5283□ctg6117□WAG-12N13  
ctg5166□ctg2853□□WAG-56I9  
ctg5166□ctg2853□□WAG-94M5  
ctg5166□ctg2853□□WAG-108G11  
ctg5166□ctg2853□ctg3489□WAG-87E15  
ctg5166□ctg2853□ctg3489□WAG-105B24  
ctg5166□ctg2853□ctg3489□WAG-124I16  
ctg5166□ctg3138□□WAG-25E12  
ctg5166□ctg3138□□WAG-77N16  
ctg5166□ctg3138□□WAG-108C23  
ctg5166□ctg3138□ctg3406□WAG-72L14  
ctg5166□ctg3138□ctg3406□WAG-72N11  
ctg5166□ctg3138□ctg3406□WAG-86A23  
ctg5166□ctg3138□ctg5542□WAG-29B18  
ctg5166□ctg3138□ctg5542□WAG-100M3  
ctg5167□ctg3583□ctg3754□WAG-68P17

ctg5167□ctg3583□ctg3754□WAG-119O12  
ctg5167□ctg3583□ctg3754□WAG-127H8  
ctg5168□ctg3141□ctg3152□WAG-47I10  
ctg5168□ctg3141□ctg3152□WAG-107K4  
ctg5168□ctg3141□ctg3152□WAG-128F22  
ctg5169□□□WAG-57J17  
ctg5169□ctg1552□□WAG-53N19  
ctg5169□ctg1552□□WAG-77A2  
ctg5169□ctg1552□ctg1400□WAG-6O2  
ctg5169□ctg1552□ctg1400□WAG-7C6  
ctg5169□ctg1552□ctg1400□WAG-26B5  
ctg5169□ctg1552□ctg1400□WAG-57K17  
ctg5169□ctg1552□ctg1400□WAG-60P5  
ctg5169□ctg1552□ctg1400□WAG-71E6  
ctg5169□ctg1552□ctg1400□WAG-76P24  
ctg5169□ctg1552□ctg1400□WAG-89O15  
ctg5169□ctg1552□ctg4678□WAG-89F15  
ctg5169□ctg1552□ctg4678□WAG-105N8  
ctg517□ctg1163□ctg1122□WAG-18J7  
ctg517□ctg1163□ctg1122□WAG-23P12  
ctg517□ctg1163□ctg1122□WAG-86M22  
ctg517□ctg1163□ctg1122□WAG-95L14  
ctg517□ctg1163□ctg1122□WAG-111H18  
ctg517□ctg1163□ctg1122□WAG-123E8  
ctg5170□ctg1229□ctg4736□WAG-5L15  
ctg5170□ctg1229□ctg4736□WAG-106O19  
ctg5171□□□WAG-I5  
ctg5171□□□WAG-20N13  
ctg5171□ctg39□□WAG-13G7  
ctg5171□ctg39□□WAG-92P18  
ctg5171□ctg39□□WAG-117C8  
ctg5171□ctg39□ctg110□WAG-15I20  
ctg5171□ctg39□ctg110□WAG-20N11  
ctg5171□ctg39□ctg110□WAG-26B21  
ctg5171□ctg39□ctg110□WAG-31H5  
ctg5171□ctg39□ctg110□WAG-33G6  
ctg5171□ctg39□ctg110□WAG-34K15  
ctg5171□ctg39□ctg110□WAG-42G2  
ctg5171□ctg39□ctg110□WAG-47H17  
ctg5171□ctg39□ctg110□WAG-51F21  
ctg5171□ctg39□ctg110□WAG-62D24  
ctg5171□ctg39□ctg110□WAG-66P20  
ctg5171□ctg39□ctg110□WAG-71G2  
ctg5171□ctg39□ctg110□WAG-77D15  
ctg5171□ctg39□ctg110□WAG-83K22  
ctg5171□ctg39□ctg110□WAG-86F5  
ctg5171□ctg39□ctg110□WAG-87E24  
ctg5171□ctg39□ctg110□WAG-91P19  
ctg5171□ctg39□ctg110□WAG-107K13  
ctg5171□ctg39□ctg110□WAG-109A10  
ctg5171□ctg39□ctg110□WAG-115A10  
ctg5171□ctg39□ctg110□WAG-117B9  
ctg5171□ctg39□ctg110□WAG-120H10  
ctg5171□ctg39□ctg110□WAG-129F15  
ctg5171□ctg6606□□WAG-1E19  
ctg5171□ctg6606□ctg1205□WAG-26E14

ctg5171□ctg6606□ctg1205□WAG-26G3  
ctg5171□ctg6606□ctg1205□WAG-69L13  
ctg5171□ctg6606□ctg1205□WAG-87M13  
ctg5171□ctg6606□ctg1205□WAG-103F18  
ctg5171□ctg6606□ctg1205□WAG-113J24  
ctg5172□□□WAG-28P3  
ctg5172□□□WAG-38I8  
ctg5172□ctg2192□ctg2332□WAG-30P3  
ctg5172□ctg2192□ctg2332□WAG-62A9  
ctg5172□ctg2192□ctg2332□WAG-121E2  
ctg5172□ctg2192□ctg2332□WAG-130A3  
ctg5173□□□WAG-105G3  
ctg5173□□□WAG-117J12  
ctg5173□ctg2871□□WAG-58C17  
ctg5173□ctg2871□ctg3720□WAG-21C19  
ctg5173□ctg2871□ctg3720□WAG-99G9  
ctg5173□ctg2871□ctg3720□WAG-103F2  
ctg5174□□□WAG-14C3  
ctg5174□ctg1389□□WAG-44P1  
ctg5174□ctg1389□□WAG-68L12  
ctg5174□ctg1389□ctg2221□WAG-44N3  
ctg5174□ctg1389□ctg2221□WAG-68D17  
ctg5174□ctg1389□ctg2221□WAG-96N10  
ctg5174□ctg1389□ctg2221□WAG-106J5  
ctg5174□ctg1389□ctg3619□WAG-10A19  
ctg5174□ctg1389□ctg3619□WAG-23L5  
ctg5174□ctg1389□ctg3619□WAG-47M11  
ctg5174□ctg1389□ctg3619□WAG-97P20  
ctg5174□ctg1389□ctg3637□WAG-31P10  
ctg5174□ctg1389□ctg3637□WAG-116E2  
ctg5174□ctg53□□WAG-112D11  
ctg5174□ctg53□ctg41□WAG-2E2  
ctg5174□ctg53□ctg41□WAG-10O14  
ctg5174□ctg53□ctg41□WAG-14J8  
ctg5174□ctg53□ctg41□WAG-20I2  
ctg5174□ctg53□ctg41□WAG-22D13  
ctg5174□ctg53□ctg41□WAG-26O16  
ctg5174□ctg53□ctg41□WAG-29G19  
ctg5174□ctg53□ctg41□WAG-37L1  
ctg5174□ctg53□ctg41□WAG-38J16  
ctg5174□ctg53□ctg41□WAG-42N20  
ctg5174□ctg53□ctg41□WAG-42N21  
ctg5174□ctg53□ctg41□WAG-46K15  
ctg5174□ctg53□ctg41□WAG-50P11  
ctg5174□ctg53□ctg41□WAG-54L20  
ctg5174□ctg53□ctg41□WAG-61A1  
ctg5174□ctg53□ctg41□WAG-73K8  
ctg5174□ctg53□ctg41□WAG-76M14  
ctg5174□ctg53□ctg41□WAG-77I6  
ctg5174□ctg53□ctg41□WAG-87H15  
ctg5174□ctg53□ctg41□WAG-94J19  
ctg5174□ctg53□ctg41□WAG-113M14  
ctg5174□ctg53□ctg41□WAG-114D17  
ctg5174□ctg53□ctg41□WAG-126C21  
ctg5174□ctg53□ctg41□WAG-126H2  
ctg5174□ctg53□ctg41□WAG-129E22

ctg5175□□□WAG-18P15  
ctg5175□ctg21□□WAG-10O1  
ctg5175□ctg21□□WAG-50K10  
ctg5175□ctg21□ctg21□WAG-29D7  
ctg5175□ctg21□ctg21□WAG-31L17  
ctg5175□ctg21□ctg21□WAG-32M12  
ctg5175□ctg21□ctg21□WAG-34G10  
ctg5175□ctg21□ctg21□WAG-40A7  
ctg5175□ctg21□ctg21□WAG-53P9  
ctg5175□ctg21□ctg21□WAG-55F21  
ctg5175□ctg21□ctg21□WAG-60D11  
ctg5175□ctg21□ctg21□WAG-69B6  
ctg5175□ctg21□ctg21□WAG-72P23  
ctg5175□ctg21□ctg21□WAG-73G24  
ctg5175□ctg21□ctg21□WAG-77K11  
ctg5175□ctg21□ctg21□WAG-79F15  
ctg5175□ctg21□ctg21□WAG-84H16  
ctg5175□ctg21□ctg21□WAG-93H16  
ctg5175□ctg21□ctg21□WAG-95J13  
ctg5175□ctg21□ctg21□WAG-106O1  
ctg5175□ctg21□ctg21□WAG-117I1  
ctg5175□ctg21□ctg21□WAG-119L17  
ctg5175□ctg21□ctg21□WAG-121B1  
ctg5175□ctg21□ctg21□WAG-127J1  
ctg5175□ctg21□ctg21□WAG-127J3  
ctg5176□ctg3902□□WAG-65O17  
ctg5176□ctg3902□ctg5266□WAG-5N1  
ctg5176□ctg3902□ctg5266□WAG-6F11  
ctg5177□ctg984□□WAG-D15  
ctg5177□ctg984□□WAG-40H15  
ctg5177□ctg984□ctg1139□WAG-10I5  
ctg5177□ctg984□ctg1139□WAG-70D6  
ctg5177□ctg984□ctg1139□WAG-86G9  
ctg5178□□□WAG-48D16  
ctg5178□ctg1082□□WAG-92H17  
ctg5178□ctg1082□ctg2108□WAG-3D18  
ctg5178□ctg1082□ctg2108□WAG-26M1  
ctg5178□ctg1082□ctg2108□WAG-49P11  
ctg5178□ctg1082□ctg2108□WAG-96G23  
ctg5178□ctg1082□ctg2108□WAG-117L21  
ctg5178□ctg1082□ctg925□WAG-39B13  
ctg5178□ctg1082□ctg925□WAG-92A11  
ctg5178□ctg1082□ctg925□WAG-95A9  
ctg5178□ctg1082□ctg925□WAG-98K15  
ctg5178□ctg1082□ctg925□WAG-103H22  
ctg5178□ctg1082□ctg925□WAG-120H4  
ctg5179□ctg4957□ctg5355□WAG-64H3  
ctg5179□ctg4957□ctg5355□WAG-95K10  
ctg518□□□WAG-30P2  
ctg518□□□WAG-37P4  
ctg518□□□WAG-54B16  
ctg518□ctg1808□□WAG-75I24  
ctg518□ctg1808□ctg1632□WAG-37E5  
ctg518□ctg1808□ctg1632□WAG-76F24  
ctg518□ctg1808□ctg1632□WAG-85L3  
ctg518□ctg1808□ctg1632□WAG-107K7

ctg518□ctg1808□ctg1632□WAG-108H6  
ctg518□ctg1808□ctg1632□WAG-121D3  
ctg518□ctg1808□ctg4036□WAG-25D8  
ctg518□ctg1808□ctg4036□WAG-54C16  
ctg518□ctg1808□ctg4036□WAG-68O9  
ctg518□ctg1808□ctg4036□WAG-76G20  
ctg518□ctg1808□ctg6201□WAG-79I23  
ctg518□ctg1808□ctg6201□WAG-105P8  
ctg518□ctg6086□□WAG-102J21  
ctg518□ctg6086□□WAG-103E8  
ctg5180□□□WAG-29O21  
ctg5180□□□WAG-115L14  
ctg5180□ctg6593□ctg3630□WAG-32L20  
ctg5180□ctg6593□ctg3630□WAG-84A20  
ctg5180□ctg6593□ctg3630□WAG-84C8  
ctg5180□ctg6593□ctg3630□WAG-87H17  
ctg5180□ctg6593□ctg3630□WAG-102E9  
ctg5181□□□WAG-5J4  
ctg5181□ctg6594□□WAG-36C1  
ctg5181□ctg6594□ctg1253□WAG-51M9  
ctg5181□ctg6594□ctg1253□WAG-58B14  
ctg5181□ctg6594□ctg1253□WAG-65D14  
ctg5181□ctg6594□ctg1253□WAG-85C14  
ctg5182□□□WAG-105J7  
ctg5182□ctg649□□WAG-37C4  
ctg5182□ctg649□□WAG-78H5  
ctg5182□ctg649□ctg5065□WAG-59F14  
ctg5182□ctg649□ctg5065□WAG-103D23  
ctg5182□ctg649□ctg6895□WAG-18B16  
ctg5182□ctg649□ctg6895□WAG-106C8  
ctg5182□ctg649□ctg743□WAG-20E8  
ctg5182□ctg649□ctg743□WAG-32F12  
ctg5182□ctg649□ctg743□WAG-41K8  
ctg5182□ctg649□ctg743□WAG-53D10  
ctg5182□ctg649□ctg743□WAG-61J22  
ctg5182□ctg649□ctg743□WAG-82D7  
ctg5182□ctg649□ctg743□WAG-92D1  
ctg5182□ctg649□ctg743□WAG-107B9  
ctg5182□ctg649□ctg743□WAG-109M16  
ctg5183□ctg119□□WAG-28A6  
ctg5183□ctg119□□WAG-47D18  
ctg5183□ctg119□□WAG-76J20  
ctg5183□ctg119□ctg127□WAG-12C11  
ctg5183□ctg119□ctg127□WAG-16H20  
ctg5183□ctg119□ctg127□WAG-19F5  
ctg5183□ctg119□ctg127□WAG-23N10  
ctg5183□ctg119□ctg127□WAG-30I13  
ctg5183□ctg119□ctg127□WAG-38C5  
ctg5183□ctg119□ctg127□WAG-45E14  
ctg5183□ctg119□ctg127□WAG-52H19  
ctg5183□ctg119□ctg127□WAG-53M11  
ctg5183□ctg119□ctg127□WAG-65B9  
ctg5183□ctg119□ctg127□WAG-67L12  
ctg5183□ctg119□ctg127□WAG-69E16  
ctg5183□ctg119□ctg127□WAG-80O15  
ctg5183□ctg119□ctg127□WAG-82J22

ctg5183□ctg119□ctg127□WAG-83I24  
ctg5183□ctg119□ctg127□WAG-84I22  
ctg5183□ctg119□ctg127□WAG-87N15  
ctg5183□ctg119□ctg127□WAG-95I5  
ctg5183□ctg119□ctg127□WAG-99E18  
ctg5183□ctg119□ctg127□WAG-100A3  
ctg5183□ctg119□ctg127□WAG-108P8  
ctg5183□ctg119□ctg127□WAG-112D13  
ctg5183□ctg119□ctg1736□WAG-10M19  
ctg5183□ctg119□ctg1736□WAG-35J2  
ctg5183□ctg119□ctg1736□WAG-110D18  
ctg5183□ctg119□ctg1736□WAG-125E9  
ctg5183□ctg119□ctg475□WAG-35J6  
ctg5183□ctg119□ctg475□WAG-62P9  
ctg5183□ctg119□ctg475□WAG-81M24  
ctg5183□ctg119□ctg475□WAG-122K9  
ctg5183□ctg119□ctg475□WAG-123B4  
ctg5183□ctg119□ctg475□WAG-125P9  
ctg5183□ctg119□ctg475□WAG-127D21  
ctg5184□□□WAG-39M1  
ctg5184□ctg912□ctg5069□WAG-47E7  
ctg5184□ctg912□ctg5069□WAG-88N4  
ctg5185□ctg2277□ctg2182□WAG-11F24  
ctg5185□ctg2277□ctg2182□WAG-41B21  
ctg5185□ctg2277□ctg2182□WAG-64A7  
ctg5185□ctg2277□ctg2182□WAG-101L12  
ctg5185□ctg5244□ctg6035□WAG-39I7  
ctg5185□ctg5244□ctg6035□WAG-39I9  
ctg5186□□□WAG-25P22  
ctg5186□□□WAG-27C11  
ctg5186□□□WAG-36H24  
ctg5186□□□WAG-115B20  
ctg5186□ctg19□□WAG-96D10  
ctg5186□ctg19□ctg14□WAG-2C13  
ctg5186□ctg19□ctg14□WAG-14N15  
ctg5186□ctg19□ctg14□WAG-25I10  
ctg5186□ctg19□ctg14□WAG-28F24  
ctg5186□ctg19□ctg14□WAG-29M9  
ctg5186□ctg19□ctg14□WAG-33L4  
ctg5186□ctg19□ctg14□WAG-33M12  
ctg5186□ctg19□ctg14□WAG-51E16  
ctg5186□ctg19□ctg14□WAG-54H5  
ctg5186□ctg19□ctg14□WAG-61J13  
ctg5186□ctg19□ctg14□WAG-63F20  
ctg5186□ctg19□ctg14□WAG-76M1  
ctg5186□ctg19□ctg14□WAG-82M12  
ctg5186□ctg19□ctg14□WAG-88D12  
ctg5186□ctg19□ctg14□WAG-97B7  
ctg5186□ctg19□ctg14□WAG-106E9  
ctg5186□ctg19□ctg14□WAG-114P21  
ctg5186□ctg19□ctg14□WAG-119N1  
ctg5186□ctg19□ctg14□WAG-125P18  
ctg5186□ctg19□ctg14□WAG-130C18  
ctg5187□□□WAG-107I20  
ctg5187□□□WAG-119K14  
ctg5187□□□WAG-122A2

ctg5187□ctg444□□WAG-7J3  
ctg5187□ctg444□□WAG-17O5  
ctg5187□ctg444□□WAG-76M2  
ctg5187□ctg444□ctg3180□WAG-17O10  
ctg5187□ctg444□ctg3180□WAG-19F7  
ctg5187□ctg444□ctg3180□WAG-124G1  
ctg5187□ctg444□ctg356□WAG-17K17  
ctg5187□ctg444□ctg356□WAG-43N3  
ctg5187□ctg444□ctg356□WAG-48E4  
ctg5187□ctg444□ctg356□WAG-88A3  
ctg5187□ctg444□ctg356□WAG-95M13  
ctg5187□ctg444□ctg356□WAG-99F15  
ctg5187□ctg444□ctg356□WAG-99H18  
ctg5187□ctg444□ctg356□WAG-107L18  
ctg5187□ctg444□ctg356□WAG-116K17  
ctg5187□ctg444□ctg3853□WAG-92M16  
ctg5187□ctg444□ctg3853□WAG-93O10  
ctg5187□ctg444□ctg3853□WAG-121P21  
ctg5187□ctg444□ctg6429□WAG-17I14  
ctg5187□ctg444□ctg6429□WAG-69E23  
ctg5188□ctg1203□ctg4056□WAG-64F12  
ctg5188□ctg1203□ctg4056□WAG-70P9  
ctg5189□ctg263□□WAG-8F12  
ctg5189□ctg263□□WAG-14I17  
ctg5189□ctg263□ctg257□WAG-6H22  
ctg5189□ctg263□ctg257□WAG-15D20  
ctg5189□ctg263□ctg257□WAG-23G5  
ctg5189□ctg263□ctg257□WAG-29H3  
ctg5189□ctg263□ctg257□WAG-29I17  
ctg5189□ctg263□ctg257□WAG-52P6  
ctg5189□ctg263□ctg257□WAG-79B12  
ctg5189□ctg263□ctg257□WAG-86C22  
ctg5189□ctg263□ctg257□WAG-93G24  
ctg5189□ctg263□ctg257□WAG-110K11  
ctg5189□ctg263□ctg257□WAG-113A9  
ctg5189□ctg263□ctg257□WAG-113F18  
ctg5189□ctg263□ctg257□WAG-129G15  
ctg5189□ctg263□ctg276□WAG-3K21  
ctg5189□ctg263□ctg276□WAG-15M19  
ctg5189□ctg263□ctg276□WAG-39P15  
ctg5189□ctg263□ctg276□WAG-40K7  
ctg5189□ctg263□ctg276□WAG-47P2  
ctg5189□ctg263□ctg276□WAG-53D11  
ctg5189□ctg263□ctg276□WAG-61A5  
ctg5189□ctg263□ctg276□WAG-62A6  
ctg5189□ctg263□ctg276□WAG-78D20  
ctg5189□ctg263□ctg276□WAG-83E21  
ctg5189□ctg263□ctg276□WAG-84H15  
ctg5189□ctg263□ctg276□WAG-91M12  
ctg5189□ctg263□ctg276□WAG-109C11  
ctg5189□ctg263□ctg276□WAG-113B15  
ctg5189□ctg263□ctg276□WAG-114K14  
ctg519□ctg1391□ctg1625□WAG-54I6  
ctg519□ctg1391□ctg1625□WAG-55O4  
ctg519□ctg1391□ctg1625□WAG-85P11  
ctg519□ctg1391□ctg1625□WAG-105H19



ctg519□ctg1391□ctg1625□WAG-108D9  
ctg519□ctg1391□ctg1625□WAG-110F3  
ctg519□ctg1391□ctg1625□WAG-123D2  
ctg519□ctg1391□ctg4001□WAG-65P20  
ctg519□ctg1391□ctg4001□WAG-114C5  
ctg519□ctg1391□ctg4001□WAG-118L7  
ctg519□ctg3621□□WAG-91G7  
ctg519□ctg3621□ctg4899□WAG-52K10  
ctg519□ctg3621□ctg4899□WAG-80L16  
ctg519□ctg4163□□WAG-30G23  
ctg519□ctg4163□ctg6495□WAG-51O12  
ctg519□ctg4163□ctg6495□WAG-85H2  
ctg5190□□□WAG-45N8  
ctg5190□□□WAG-73O9  
ctg5190□ctg143□□WAG-105F2  
ctg5190□ctg143□ctg138□WAG-15B15  
ctg5190□ctg143□ctg138□WAG-17G12  
ctg5190□ctg143□ctg138□WAG-18K20  
ctg5190□ctg143□ctg138□WAG-37H12  
ctg5190□ctg143□ctg138□WAG-38K13  
ctg5190□ctg143□ctg138□WAG-60I13  
ctg5190□ctg143□ctg138□WAG-67K9  
ctg5190□ctg143□ctg138□WAG-83A9  
ctg5190□ctg143□ctg138□WAG-88P11  
ctg5190□ctg143□ctg138□WAG-106O22  
ctg5190□ctg143□ctg138□WAG-121K2  
ctg5190□ctg143□ctg138□WAG-124N19  
ctg5190□ctg528□ctg617□WAG-13O6  
ctg5190□ctg528□ctg617□WAG-47O2  
ctg5190□ctg528□ctg617□WAG-64H20  
ctg5190□ctg528□ctg617□WAG-66K13  
ctg5190□ctg528□ctg617□WAG-83B6  
ctg5190□ctg528□ctg617□WAG-85I15  
ctg5190□ctg528□ctg617□WAG-85L14  
ctg5190□ctg528□ctg617□WAG-96K5  
ctg5190□ctg528□ctg617□WAG-102G12  
ctg5190□ctg528□ctg617□WAG-106I12  
ctg5190□ctg528□ctg617□WAG-122N1  
ctg5191□ctg20□ctg13□WAG-4D2  
ctg5191□ctg20□ctg13□WAG-15I3  
ctg5191□ctg20□ctg13□WAG-25A11  
ctg5191□ctg20□ctg13□WAG-33G21  
ctg5191□ctg20□ctg13□WAG-34A13  
ctg5191□ctg20□ctg13□WAG-40B7  
ctg5191□ctg20□ctg13□WAG-56E15  
ctg5191□ctg20□ctg13□WAG-64F10  
ctg5191□ctg20□ctg13□WAG-66K22  
ctg5191□ctg20□ctg13□WAG-76A24  
ctg5191□ctg20□ctg13□WAG-90L2  
ctg5191□ctg20□ctg13□WAG-122B15  
ctg5192□□□WAG-4L8  
ctg5192□□□WAG-47J15  
ctg5192□ctg6592□ctg2648□WAG-25M2  
ctg5192□ctg6592□ctg2648□WAG-51A15  
ctg5192□ctg6592□ctg2648□WAG-123C18  
ctg5192□ctg6592□ctg3726□WAG-25N21

ctg5192□ctg6592□ctg3726□WAG-26A19  
ctg5192□ctg6592□ctg3726□WAG-31J6  
ctg5192□ctg6592□ctg3726□WAG-59E3  
ctg5192□ctg6592□ctg3726□WAG-65H13  
ctg5192□ctg6592□ctg3726□WAG-101L13  
ctg5193□□□WAG-20E12  
ctg5193□□□WAG-48A16  
ctg5193□ctg6586□ctg1545□WAG-38J10  
ctg5193□ctg6586□ctg1545□WAG-40E3  
ctg5193□ctg6586□ctg1545□WAG-89M2  
ctg5193□ctg6586□ctg1545□WAG-102N20  
ctg5193□ctg6586□ctg2638□WAG-3E20  
ctg5193□ctg6586□ctg2638□WAG-106C12  
ctg5193□ctg6586□ctg2638□WAG-107I21  
ctg5193□ctg6586□ctg2638□WAG-129D10  
ctg5194□ctg99□□WAG-26B1  
ctg5194□ctg99□□WAG-88O7  
ctg5194□ctg99□□WAG-107D14  
ctg5194□ctg99□□WAG-115B11  
ctg5194□ctg99□ctg5855□WAG-77E6  
ctg5194□ctg99□ctg5855□WAG-93A9  
ctg5195□□□WAG-4A12  
ctg5195□□□WAG-11B4  
ctg5195□□□WAG-24P21  
ctg5195□□□WAG-60H22  
ctg5195□□□WAG-87M4  
ctg5195□ctg6582□□WAG-7D12  
ctg5195□ctg6582□□WAG-105C24  
ctg5195□ctg6582□□WAG-122K16  
ctg5195□ctg6582□ctg187□WAG-7B15  
ctg5195□ctg6582□ctg187□WAG-9D4  
ctg5195□ctg6582□ctg187□WAG-10L24  
ctg5195□ctg6582□ctg187□WAG-16D7  
ctg5195□ctg6582□ctg187□WAG-18L23  
ctg5195□ctg6582□ctg187□WAG-24P20  
ctg5195□ctg6582□ctg187□WAG-26K22  
ctg5195□ctg6582□ctg187□WAG-43N6  
ctg5195□ctg6582□ctg187□WAG-75O16  
ctg5195□ctg6582□ctg187□WAG-76H12  
ctg5195□ctg6582□ctg187□WAG-89K8  
ctg5195□ctg6582□ctg187□WAG-91L16  
ctg5195□ctg6582□ctg187□WAG-95D14  
ctg5195□ctg6582□ctg187□WAG-109B22  
ctg5195□ctg6582□ctg5727□WAG-51H19  
ctg5195□ctg6582□ctg5727□WAG-57J4  
ctg5195□ctg6602□□WAG-53F5  
ctg5195□ctg6602□□WAG-68J16  
ctg5195□ctg6602□□WAG-95G12  
ctg5195□ctg6602□□WAG-122B18  
ctg5195□ctg6602□ctg2173□WAG-14B20  
ctg5195□ctg6602□ctg2173□WAG-30E21  
ctg5195□ctg6602□ctg2173□WAG-31H7  
ctg5195□ctg6602□ctg2173□WAG-46F15  
ctg5195□ctg6602□ctg2173□WAG-57B18  
ctg5195□ctg6602□ctg2173□WAG-57O14  
ctg5195□ctg6602□ctg2173□WAG-80A1

ctg5195□ctg6602□ctg2173□WAG-85G5  
ctg5195□ctg6602□ctg2173□WAG-98C13  
ctg5195□ctg6602□ctg2173□WAG-107D10  
ctg5195□ctg6602□ctg2173□WAG-125H20  
ctg5195□ctg6611□□WAG-9G24  
ctg5195□ctg6611□□WAG-128H24  
ctg5195□ctg6611□ctg464□WAG-30F11  
ctg5195□ctg6611□ctg464□WAG-34K12  
ctg5195□ctg6611□ctg464□WAG-36B12  
ctg5195□ctg6611□ctg464□WAG-37L17  
ctg5195□ctg6611□ctg464□WAG-55C3  
ctg5195□ctg6611□ctg464□WAG-74O22  
ctg5195□ctg6611□ctg464□WAG-77J5  
ctg5195□ctg6611□ctg464□WAG-81P2  
ctg5195□ctg6611□ctg464□WAG-88B17  
ctg5195□ctg6611□ctg464□WAG-91G3  
ctg5195□ctg6611□ctg464□WAG-102I16  
ctg5195□ctg6611□ctg464□WAG-109H12  
ctg5195□ctg6611□ctg464□WAG-111I5  
ctg5195□ctg6611□ctg464□WAG-112N8  
ctg5195□ctg6611□ctg464□WAG-112O5  
ctg5195□ctg6611□ctg464□WAG-121E18  
ctg5196□□□WAG-115D12  
ctg5196□ctg1047□□WAG-124N23  
ctg5196□ctg1047□ctg1491□WAG-2B11  
ctg5196□ctg1047□ctg1491□WAG-65I7  
ctg5196□ctg1047□ctg1491□WAG-73B11  
ctg5196□ctg1047□ctg1491□WAG-78I17  
ctg5196□ctg1047□ctg1491□WAG-107P13  
ctg5196□ctg154□□WAG-14M18  
ctg5196□ctg154□ctg146□WAG-53A5  
ctg5196□ctg154□ctg146□WAG-54J14  
ctg5196□ctg154□ctg146□WAG-60M23  
ctg5196□ctg154□ctg146□WAG-61L14  
ctg5196□ctg154□ctg146□WAG-62M7  
ctg5196□ctg154□ctg146□WAG-75F5  
ctg5196□ctg154□ctg146□WAG-109H17  
ctg5196□ctg154□ctg146□WAG-115F19  
ctg5196□ctg154□ctg146□WAG-120O11  
ctg5196□ctg154□ctg146□WAG-129K21  
ctg5196□ctg154□ctg146□WAG-130N5  
ctg5196□ctg154□ctg2702□WAG-61A6  
ctg5196□ctg154□ctg2702□WAG-92P12  
ctg5196□ctg154□ctg2702□WAG-98O18  
ctg5196□ctg154□ctg739□WAG-9H11  
ctg5196□ctg154□ctg739□WAG-15I8  
ctg5196□ctg154□ctg739□WAG-17L4  
ctg5196□ctg154□ctg739□WAG-23L17  
ctg5196□ctg154□ctg739□WAG-43H14  
ctg5196□ctg154□ctg739□WAG-60D4  
ctg5196□ctg154□ctg739□WAG-62I13  
ctg5196□ctg154□ctg739□WAG-64A5  
ctg5196□ctg154□ctg739□WAG-66J15  
ctg5196□ctg154□ctg739□WAG-83M8  
ctg5196□ctg154□ctg739□WAG-87M9  
ctg5196□ctg154□ctg739□WAG-115K13

ctg5196□ctg154□ctg739□WAG-116N7  
ctg5196□ctg154□ctg739□WAG-121G15  
ctg5196□ctg154□ctg739□WAG-126O12  
ctg5196□ctg605□□WAG-8J24  
ctg5196□ctg605□□WAG-79K8  
ctg5196□ctg605□□WAG-83C1  
ctg5196□ctg605□ctg4957□WAG-95B5  
ctg5196□ctg605□ctg4957□WAG-105O20  
ctg5196□ctg605□ctg6517□WAG-18F13  
ctg5196□ctg605□ctg6517□WAG-116M3  
ctg5196□ctg605□ctg797□WAG-21G10  
ctg5196□ctg605□ctg797□WAG-45F21  
ctg5196□ctg605□ctg797□WAG-47J12  
ctg5196□ctg605□ctg797□WAG-59G21  
ctg5196□ctg605□ctg797□WAG-67H1  
ctg5196□ctg605□ctg797□WAG-92L16  
ctg5196□ctg605□ctg797□WAG-93O16  
ctg5196□ctg605□ctg797□WAG-99P11  
ctg5196□ctg605□ctg797□WAG-101F17  
ctg5196□ctg605□ctg797□WAG-102H14  
ctg5196□ctg605□ctg797□WAG-128F12  
ctg5197□ctg3563□ctg3731□WAG-2H6  
ctg5197□ctg3563□ctg3731□WAG-90K7  
ctg5197□ctg3563□ctg3731□WAG-95G15  
ctg5198□□□WAG-125M12  
ctg5198□ctg2890□ctg3660□WAG-13B8  
ctg5198□ctg2890□ctg3660□WAG-13E5  
ctg5198□ctg2890□ctg3660□WAG-80F8  
ctg5198□ctg2890□ctg6889□WAG-17K18  
ctg5198□ctg2890□ctg6889□WAG-20O21  
ctg5199□□□WAG-55G3  
ctg5199□ctg2439□□WAG-35M23  
ctg5199□ctg2439□ctg5974□WAG-56L7  
ctg5199□ctg2439□ctg5974□WAG-87I19  
ctg5199□ctg2439□ctg6309□WAG-66I1  
ctg5199□ctg2439□ctg6309□WAG-93D21  
ctg52□□□WAG-27F11  
ctg52□□□WAG-81J6  
ctg52□ctg176□□WAG-34M8  
ctg52□ctg176□□WAG-50P2  
ctg52□ctg176□□WAG-61J11  
ctg52□ctg176□□WAG-90L20  
ctg52□ctg176□□WAG-106L20  
ctg52□ctg176□□WAG-128B5  
ctg52□ctg176□ctg147□WAG-75E1  
ctg52□ctg176□ctg147□WAG-77C11  
ctg52□ctg176□ctg147□WAG-83M15  
ctg52□ctg176□ctg147□WAG-86H18  
ctg52□ctg176□ctg147□WAG-86M4  
ctg52□ctg176□ctg147□WAG-88O2  
ctg52□ctg176□ctg147□WAG-90J20  
ctg52□ctg176□ctg147□WAG-106F7  
ctg52□ctg176□ctg147□WAG-109H5  
ctg52□ctg176□ctg147□WAG-115F7  
ctg52□ctg176□ctg147□WAG-118K24  
ctg52□ctg176□ctg147□WAG-119M16

ctg52□ctg176□ctg147□WAG-128F20  
ctg52□ctg176□ctg147□WAG-129N13  
ctg52□ctg176□ctg3954□WAG-32C3  
ctg52□ctg176□ctg3954□WAG-70K16  
ctg52□ctg176□ctg3954□WAG-108O1  
ctg52□ctg176□ctg4165□WAG-3F17  
ctg52□ctg176□ctg4165□WAG-62C9  
ctg52□ctg176□ctg4165□WAG-92L2  
ctg52□ctg176□ctg6650□WAG-5O8  
ctg52□ctg176□ctg6650□WAG-47D2  
ctg52□ctg176□ctg6873□WAG-88N18  
ctg52□ctg176□ctg6873□WAG-103F22  
ctg52□ctg1874□□WAG-59E2  
ctg52□ctg1874□ctg2302□WAG-34J11  
ctg52□ctg1874□ctg2302□WAG-35M13  
ctg52□ctg1874□ctg2302□WAG-74L12  
ctg520□□□WAG-118L3  
ctg520□ctg1226□□WAG-98P1  
ctg520□ctg1226□□WAG-100C15  
ctg520□ctg1226□ctg2093□WAG-9L8  
ctg520□ctg1226□ctg2093□WAG-58F1  
ctg520□ctg1226□ctg2093□WAG-62K24  
ctg520□ctg1226□ctg2093□WAG-111O1  
ctg520□ctg4554□□WAG-49D2  
ctg520□ctg4554□ctg6945□WAG-14G10  
ctg520□ctg4554□ctg6945□WAG-66L13  
ctg5200□□□WAG-15G3  
ctg5200□□□WAG-88E11  
ctg5200□□□WAG-107I5  
ctg5200□□□WAG-112F11  
ctg5200□ctg1186□ctg1029□WAG-13F17  
ctg5200□ctg1186□ctg1029□WAG-42P8  
ctg5200□ctg1186□ctg1029□WAG-59G23  
ctg5200□ctg1186□ctg1029□WAG-76B24  
ctg5200□ctg1186□ctg1029□WAG-80C1  
ctg5200□ctg1186□ctg1029□WAG-130I9  
ctg5201□ctg6590□ctg683□WAG-10K17  
ctg5201□ctg6590□ctg683□WAG-10N2  
ctg5201□ctg6590□ctg683□WAG-42D9  
ctg5201□ctg6590□ctg683□WAG-83B10  
ctg5201□ctg6590□ctg683□WAG-83M13  
ctg5201□ctg6590□ctg683□WAG-117E14  
ctg5202□ctg2975□ctg3874□WAG-72E5  
ctg5202□ctg2975□ctg3874□WAG-76F3  
ctg5202□ctg2975□ctg3874□WAG-113B5  
ctg5202□ctg2975□ctg3874□WAG-122L8  
ctg5203□□□WAG-3H13  
ctg5203□ctg5758□□WAG-64O22  
ctg5203□ctg5758□□WAG-100H5  
ctg5204□ctg3817□□WAG-74P19  
ctg5204□ctg3817□ctg5414□WAG-30I7  
ctg5204□ctg3817□ctg5414□WAG-44I16  
ctg5205□□□WAG-31F15  
ctg5205□□□WAG-39I5  
ctg5205□ctg530□ctg432□WAG-4G3  
ctg5205□ctg530□ctg432□WAG-5G10

ctg5205□ctg530□ctg432□WAG-20C2  
ctg5205□ctg530□ctg432□WAG-30J19  
ctg5205□ctg530□ctg432□WAG-64C7  
ctg5205□ctg530□ctg432□WAG-65H4  
ctg5205□ctg530□ctg432□WAG-122L3  
ctg5205□ctg530□ctg432□WAG-127I14  
ctg5205□ctg530□ctg6206□WAG-74O14  
ctg5205□ctg530□ctg6206□WAG-99A21  
ctg5206□□□WAG-5C18  
ctg5206□ctg1377□ctg1218□WAG-37I9  
ctg5206□ctg1377□ctg1218□WAG-55N8  
ctg5206□ctg1377□ctg1218□WAG-56J15  
ctg5206□ctg1377□ctg1218□WAG-82D24  
ctg5206□ctg1377□ctg1218□WAG-119M1  
ctg5206□ctg228□□□WAG-14H24  
ctg5206□ctg228□ctg307□WAG-1A13  
ctg5206□ctg228□ctg307□WAG-29J3  
ctg5206□ctg228□ctg307□WAG-31B24  
ctg5206□ctg228□ctg307□WAG-45G13  
ctg5206□ctg228□ctg307□WAG-56P17  
ctg5206□ctg228□ctg307□WAG-62K14  
ctg5206□ctg228□ctg307□WAG-71N8  
ctg5206□ctg228□ctg307□WAG-71N11  
ctg5206□ctg228□ctg307□WAG-115F14  
ctg5206□ctg228□ctg307□WAG-118F11  
ctg5207□□□WAG-8H9  
ctg5207□ctg6588□□□WAG-95O22  
ctg5207□ctg6588□ctg1053□WAG-3L3  
ctg5207□ctg6588□ctg1053□WAG-20C13  
ctg5207□ctg6588□ctg1053□WAG-39H5  
ctg5207□ctg6588□ctg1053□WAG-44G4  
ctg5207□ctg6588□ctg1053□WAG-45H1  
ctg5207□ctg6588□ctg1053□WAG-53I3  
ctg5207□ctg6588□ctg1053□WAG-60O21  
ctg5207□ctg6588□ctg1053□WAG-82O2  
ctg5207□ctg6588□ctg1053□WAG-84C19  
ctg5207□ctg6588□ctg1053□WAG-86B11  
ctg5207□ctg6588□ctg1053□WAG-91L15  
ctg5207□ctg6588□ctg1053□WAG-100E2  
ctg5207□ctg6588□ctg1053□WAG-102G6  
ctg5207□ctg6588□ctg1053□WAG-113F3  
ctg5207□ctg6588□ctg1053□WAG-114D13  
ctg5207□ctg6588□ctg1053□WAG-116J10  
ctg5208□□□WAG-26M11  
ctg5208□ctg2226□ctg2110□WAG-69L15  
ctg5208□ctg2226□ctg2110□WAG-85K22  
ctg5208□ctg2226□ctg2110□WAG-106H4  
ctg5208□ctg2226□ctg2110□WAG-128H11  
ctg5209□□□WAG-6L12  
ctg5209□□□WAG-31E22  
ctg5209□ctg702□□□WAG-38C9  
ctg5209□ctg702□□□WAG-39B24  
ctg5209□ctg702□□□WAG-74E13  
ctg5209□ctg702□ctg1082□WAG-87D20  
ctg5209□ctg702□ctg1082□WAG-94C10  
ctg5209□ctg702□ctg1082□WAG-108I24

ctg5209□ctg702□ctg1082□WAG-121I22  
ctg5209□ctg702□ctg1082□WAG-125I19  
ctg5209□ctg702□ctg1701□WAG-12E6  
ctg5209□ctg702□ctg1701□WAG-51O22  
ctg5209□ctg702□ctg1701□WAG-74H6  
ctg5209□ctg702□ctg1701□WAG-75P18  
ctg5209□ctg702□ctg1701□WAG-78F18  
ctg5209□ctg702□ctg1701□WAG-88M15  
ctg5209□ctg702□ctg1701□WAG-106O5  
ctg5209□ctg702□ctg2489□WAG-6E17  
ctg5209□ctg702□ctg2489□WAG-76J23  
ctg5209□ctg702□ctg2489□WAG-84N20  
ctg5209□ctg702□ctg2489□WAG-97B19  
ctg5209□ctg702□ctg2489□WAG-115L4  
ctg5209□ctg702□ctg2489□WAG-121K23  
ctg5209□ctg702□ctg4049□WAG-41G16  
ctg5209□ctg702□ctg4049□WAG-75F4  
ctg5209□ctg702□ctg4049□WAG-116J3  
ctg5209□ctg702□ctg4120□WAG-68I16  
ctg5209□ctg702□ctg4120□WAG-83L6  
ctg5209□ctg702□ctg4120□WAG-102B21  
ctg5209□ctg702□ctg4802□WAG-32L6  
ctg5209□ctg702□ctg4802□WAG-71N24  
ctg5209□ctg702□ctg745□WAG-49H22  
ctg5209□ctg702□ctg745□WAG-64H10  
ctg5209□ctg702□ctg745□WAG-67K13  
ctg5209□ctg702□ctg745□WAG-86J18  
ctg5209□ctg702□ctg745□WAG-102A4  
ctg5209□ctg702□ctg745□WAG-113N5  
ctg5209□ctg702□ctg745□WAG-128J13  
ctg521□ctg1150□□WAG-55C19  
ctg521□ctg1150□□WAG-88B24  
ctg521□ctg1150□ctg1012□WAG-54B21  
ctg521□ctg1150□ctg1012□WAG-68D20  
ctg521□ctg1150□ctg1012□WAG-126N20  
ctg521□ctg1150□ctg1012□WAG-127M5  
ctg521□ctg1150□ctg1012□WAG-128N12  
ctg521□ctg1150□ctg3640□WAG-69M20  
ctg521□ctg1150□ctg3640□WAG-122K20  
ctg521□ctg1150□ctg3640□WAG-129M19  
ctg5210□□□WAG-19D15  
ctg5210□ctg2015□□WAG-43G24  
ctg5210□ctg2015□□WAG-62N9  
ctg5210□ctg2015□□WAG-100O1  
ctg5210□ctg2015□□WAG-104D4  
ctg5210□ctg2015□ctg3133□WAG-19P22  
ctg5210□ctg2015□ctg3133□WAG-31M11  
ctg5211□□□WAG-97H20  
ctg5211□□□WAG-97K10  
ctg5211□ctg956□□WAG-41N6  
ctg5211□ctg956□□WAG-98M8  
ctg5211□ctg956□□WAG-116B12  
ctg5211□ctg956□ctg1089□WAG-12O14  
ctg5211□ctg956□ctg1089□WAG-22E19  
ctg5211□ctg956□ctg1089□WAG-25A13  
ctg5211□ctg956□ctg1089□WAG-42O13

ctg5211□ctg956□ctg1089□WAG-43M11  
ctg5211□ctg956□ctg1089□WAG-59F10  
ctg5211□ctg956□ctg1089□WAG-90K12  
ctg5211□ctg956□ctg1089□WAG-98E23  
ctg5211□ctg956□ctg1089□WAG-107M6  
ctg5211□ctg956□ctg1089□WAG-110M5  
ctg5212□□□WAG-23D3  
ctg5212□□□WAG-71C5  
ctg5212□□□WAG-126P20  
ctg5212□□□WAG-129P16  
ctg5212□ctg6583□□WAG-24D16  
ctg5212□ctg6583□□WAG-28F20  
ctg5212□ctg6583□□WAG-63E18  
ctg5212□ctg6583□□WAG-100D19  
ctg5212□ctg6583□ctg197□WAG-2D16  
ctg5212□ctg6583□ctg197□WAG-6K6  
ctg5212□ctg6583□ctg197□WAG-7D23  
ctg5212□ctg6583□ctg197□WAG-12I10  
ctg5212□ctg6583□ctg197□WAG-34L13  
ctg5212□ctg6583□ctg197□WAG-36C8  
ctg5212□ctg6583□ctg197□WAG-46N8  
ctg5212□ctg6583□ctg197□WAG-49L20  
ctg5212□ctg6583□ctg197□WAG-54L17  
ctg5212□ctg6583□ctg197□WAG-61J15  
ctg5212□ctg6583□ctg197□WAG-76F22  
ctg5212□ctg6583□ctg197□WAG-82N2  
ctg5212□ctg6583□ctg197□WAG-98H7  
ctg5212□ctg6583□ctg197□WAG-99N12  
ctg5212□ctg6583□ctg197□WAG-107E5  
ctg5212□ctg6583□ctg197□WAG-120M12  
ctg5212□ctg6583□ctg197□WAG-127O16  
ctg5212□ctg6583□ctg197□WAG-130K12  
ctg5212□ctg6583□ctg3422□WAG-123I18  
ctg5212□ctg6583□ctg3422□WAG-130G12  
ctg5212□ctg6583□ctg3422□WAG-130I12  
ctg5212□ctg6583□ctg6723□WAG-74M23  
ctg5212□ctg6583□ctg6723□WAG-130A12  
ctg5212□ctg6603□□WAG-7K1  
ctg5212□ctg6603□□WAG-56B7  
ctg5212□ctg6603□□WAG-94E8  
ctg5212□ctg6603□ctg1019□WAG-18O8  
ctg5212□ctg6603□ctg1019□WAG-23A17  
ctg5212□ctg6603□ctg1019□WAG-24N5  
ctg5212□ctg6603□ctg1019□WAG-69J11  
ctg5212□ctg6603□ctg1019□WAG-75B23  
ctg5212□ctg6603□ctg1019□WAG-122A11  
ctg5212□ctg6603□ctg1019□WAG-130E12  
ctg5212□ctg6603□ctg1019□WAG-130M12  
ctg5212□ctg6603□ctg1019□WAG-130O12  
ctg5212□ctg6603□ctg3102□WAG-21C15  
ctg5212□ctg6603□ctg3102□WAG-73O14  
ctg5212□ctg6603□ctg3102□WAG-87O20  
ctg5213□ctg1030□□WAG-50H20  
ctg5213□ctg1030□ctg857□WAG-8I6  
ctg5213□ctg1030□ctg857□WAG-46P20  
ctg5213□ctg1030□ctg857□WAG-47A2



ctg5213□ctg1030□ctg857□WAG-59P6  
ctg5213□ctg1030□ctg857□WAG-84L24  
ctg5214□ctg4089□□WAG-73G19  
ctg5214□ctg4089□□WAG-93J16  
ctg5214□ctg4089□ctg6187□WAG-10J5  
ctg5214□ctg4089□ctg6187□WAG-73H19  
ctg5215□□□WAG-40D5  
ctg5215□□□WAG-74J15  
ctg5215□ctg581□□WAG-33F3  
ctg5215□ctg581□□WAG-37P22  
ctg5215□ctg581□ctg4044□WAG-30K10  
ctg5215□ctg581□ctg4044□WAG-84K22  
ctg5215□ctg581□ctg4044□WAG-97B15  
ctg5215□ctg581□ctg629□WAG-18B3  
ctg5215□ctg581□ctg629□WAG-71K13  
ctg5215□ctg581□ctg629□WAG-104P1  
ctg5215□ctg581□ctg629□WAG-105A2  
ctg5215□ctg581□ctg629□WAG-107K22  
ctg5215□ctg581□ctg629□WAG-107N1  
ctg5216□□□WAG-36E7  
ctg5216□□□WAG-70C18  
ctg5216□ctg43□□WAG-23B5  
ctg5216□ctg43□□WAG-30M23  
ctg5216□ctg43□□WAG-46M20  
ctg5216□ctg43□□WAG-58E18  
ctg5216□ctg43□□WAG-116N21  
ctg5216□ctg43□ctg109□WAG-11I5  
ctg5216□ctg43□ctg109□WAG-19A24  
ctg5216□ctg43□ctg109□WAG-46D21  
ctg5216□ctg43□ctg109□WAG-90M12  
ctg5216□ctg43□ctg109□WAG-93N7  
ctg5216□ctg43□ctg109□WAG-97B21  
ctg5216□ctg43□ctg109□WAG-109G7  
ctg5216□ctg43□ctg6978□WAG-1D24  
ctg5216□ctg43□ctg6978□WAG-7H23  
ctg5216□ctg43□ctg6978□WAG-20E10  
ctg5216□ctg43□ctg6978□WAG-28I10  
ctg5216□ctg43□ctg6978□WAG-37G5  
ctg5216□ctg43□ctg6978□WAG-40C11  
ctg5216□ctg43□ctg6978□WAG-47M2  
ctg5216□ctg43□ctg6978□WAG-49M4  
ctg5216□ctg43□ctg6978□WAG-49N4  
ctg5216□ctg43□ctg6978□WAG-54G7  
ctg5216□ctg43□ctg6978□WAG-56H11  
ctg5216□ctg43□ctg6978□WAG-65G24  
ctg5216□ctg43□ctg6978□WAG-78C6  
ctg5216□ctg43□ctg6978□WAG-82J11  
ctg5216□ctg43□ctg6978□WAG-83L19  
ctg5216□ctg43□ctg6978□WAG-87O15  
ctg5216□ctg43□ctg6978□WAG-99J19  
ctg5216□ctg43□ctg6978□WAG-106I8  
ctg5216□ctg43□ctg6978□WAG-113C8  
ctg5216□ctg43□ctg6978□WAG-113E19  
ctg5216□ctg43□ctg6978□WAG-115I10  
ctg5216□ctg43□ctg6978□WAG-116G2  
ctg5216□ctg43□ctg6978□WAG-116M24

ctg5216□ctg43□ctg6978□WAG-119B1  
ctg5216□ctg43□ctg6978□WAG-121D11  
ctg5216□ctg43□ctg6978□WAG-122H7  
ctg5216□ctg43□ctg6978□WAG-129A23  
ctg5217□□□WAG-22E6  
ctg5217□ctg1732□ctg1836□WAG-46I1  
ctg5217□ctg1732□ctg1836□WAG-65E9  
ctg5217□ctg1732□ctg1836□WAG-96F13  
ctg5217□ctg1732□ctg1836□WAG-107B20  
ctg5217□ctg1732□ctg1836□WAG-113C21  
ctg5217□ctg1732□ctg1836□WAG-116P10  
ctg5217□ctg1732□ctg1836□WAG-122N14  
ctg5217□ctg1732□ctg2499□WAG-4M3  
ctg5217□ctg1732□ctg2499□WAG-7C15  
ctg5217□ctg1732□ctg2499□WAG-10C19  
ctg5217□ctg1732□ctg2499□WAG-70F6  
ctg5218□□□WAG-102P10  
ctg5218□□□WAG-121P7  
ctg5218□ctg501□□WAG-25J21  
ctg5218□ctg501□□WAG-63M23  
ctg5218□ctg501□ctg556□WAG-13A7  
ctg5218□ctg501□ctg556□WAG-14M1  
ctg5218□ctg501□ctg556□WAG-24N14  
ctg5218□ctg501□ctg556□WAG-44L18  
ctg5218□ctg501□ctg556□WAG-64F7  
ctg5218□ctg501□ctg556□WAG-83E1  
ctg5218□ctg501□ctg556□WAG-83I4  
ctg5218□ctg501□ctg556□WAG-87J22  
ctg5218□ctg501□ctg556□WAG-95I1  
ctg5219□□□WAG-101G13  
ctg5219□ctg5503□ctg6609□WAG-88E13  
ctg5219□ctg5503□ctg6609□WAG-105C15  
ctg522□□□WAG-22J23  
ctg522□□□WAG-59P13  
ctg522□□□WAG-115F1  
ctg522□ctg2039□□WAG-5L20  
ctg522□ctg2039□ctg2467□WAG-31B16  
ctg522□ctg2039□ctg2467□WAG-75L8  
ctg522□ctg2039□ctg2467□WAG-91A12  
ctg522□ctg2039□ctg2467□WAG-110A5  
ctg522□ctg2039□ctg2467□WAG-130I4  
ctg522□ctg2039□ctg3425□WAG-50G9  
ctg522□ctg2039□ctg3425□WAG-99E10  
ctg522□ctg2039□ctg3425□WAG-119M24  
ctg522□ctg6343□□WAG-83M11  
ctg522□ctg6343□□WAG-84L1  
ctg5220□□□WAG-49C15  
ctg5220□ctg372□□WAG-73K4  
ctg5220□ctg372□□WAG-130O8  
ctg5220□ctg372□ctg1490□WAG-74O2  
ctg5220□ctg372□ctg1490□WAG-93H24  
ctg5220□ctg372□ctg1490□WAG-101H22  
ctg5220□ctg372□ctg1490□WAG-124D6  
ctg5220□ctg372□ctg1876□WAG-24P2  
ctg5220□ctg372□ctg1876□WAG-74E15  
ctg5220□ctg372□ctg1876□WAG-75L1

ctg5220□ctg372□ctg1876□WAG-76A1  
ctg5220□ctg372□ctg506□WAG-40K23  
ctg5220□ctg372□ctg506□WAG-42N10  
ctg5220□ctg372□ctg506□WAG-44J1  
ctg5220□ctg372□ctg506□WAG-48C22  
ctg5220□ctg372□ctg506□WAG-79P23  
ctg5220□ctg372□ctg506□WAG-81A24  
ctg5220□ctg372□ctg506□WAG-85B9  
ctg5220□ctg372□ctg506□WAG-126K3  
ctg5221□□□WAG-24A2  
ctg5221□□□WAG-53I7  
ctg5221□ctg2689□□WAG-81J13  
ctg5221□ctg2689□ctg3207□WAG-67A4  
ctg5221□ctg2689□ctg3207□WAG-80I7  
ctg5221□ctg2689□ctg3207□WAG-85P22  
ctg5221□ctg2689□ctg3207□WAG-121M19  
ctg5222□ctg3214□ctg3243□WAG-14H4  
ctg5222□ctg3214□ctg3243□WAG-127N21  
ctg5223□□□WAG-67P22  
ctg5223□ctg1623□ctg2402□WAG-42G24  
ctg5223□ctg1623□ctg2402□WAG-42M20  
ctg5223□ctg1623□ctg2402□WAG-50C16  
ctg5223□ctg1623□ctg2402□WAG-70M9  
ctg5223□ctg1623□ctg2402□WAG-98J16  
ctg5223□ctg1623□ctg2402□WAG-110J14  
ctg5223□ctg1623□ctg5434□WAG-102F8  
ctg5223□ctg1623□ctg5434□WAG-119C20  
ctg5224□ctg1608□ctg1456□WAG-17J12  
ctg5224□ctg1608□ctg1456□WAG-20M13  
ctg5224□ctg1608□ctg1456□WAG-64J9  
ctg5224□ctg2243□ctg2893□WAG-3L19  
ctg5224□ctg2243□ctg2893□WAG-9F3  
ctg5224□ctg2243□ctg2893□WAG-18I4  
ctg5224□ctg2243□ctg2893□WAG-81A13  
ctg5224□ctg2742□□WAG-125H17  
ctg5224□ctg2742□ctg3666□WAG-116E3  
ctg5224□ctg2742□ctg3666□WAG-125B14  
ctg5224□ctg2742□ctg5089□WAG-11F19  
ctg5224□ctg2742□ctg5089□WAG-11F20  
ctg5225□ctg3261□ctg6049□WAG-4J9  
ctg5225□ctg3261□ctg6049□WAG-7L19  
ctg5225□ctg3261□ctg6354□WAG-22C6  
ctg5225□ctg3261□ctg6354□WAG-127B14  
ctg5226□ctg6589□□WAG-110L2  
ctg5226□ctg6589□ctg751□WAG-11P16  
ctg5226□ctg6589□ctg751□WAG-20J20  
ctg5226□ctg6589□ctg751□WAG-25G5  
ctg5226□ctg6589□ctg751□WAG-28I3  
ctg5226□ctg6589□ctg751□WAG-61G10  
ctg5226□ctg6589□ctg751□WAG-88G3  
ctg5226□ctg6589□ctg751□WAG-90B6  
ctg5226□ctg6589□ctg751□WAG-102L15  
ctg5226□ctg6589□ctg751□WAG-103C24  
ctg5226□ctg6589□ctg751□WAG-110E19  
ctg5226□ctg6589□ctg751□WAG-113P8  
ctg5226□ctg6589□ctg751□WAG-126N4

ctg5227□□□WAG-34D20  
ctg5227□□□WAG-122E18  
ctg5227□ctg6581□ctg1311□WAG-21M3  
ctg5227□ctg6581□ctg1311□WAG-86E11  
ctg5227□ctg6581□ctg1311□WAG-90F6  
ctg5227□ctg6581□ctg1892□WAG-41H17  
ctg5227□ctg6581□ctg1892□WAG-41H18  
ctg5227□ctg6581□ctg1892□WAG-62C21  
ctg5227□ctg6581□ctg1892□WAG-62E19  
ctg5227□ctg6581□ctg1892□WAG-81G17  
ctg5227□ctg6581□ctg1892□WAG-126G8  
ctg5228□□□WAG-31F9  
ctg5228□□□WAG-43I24  
ctg5228□□□WAG-71L6  
ctg5228□ctg6584□□WAG-16L11  
ctg5228□ctg6584□□WAG-20C5  
ctg5228□ctg6584□□WAG-74P3  
ctg5228□ctg6584□□WAG-94I20  
ctg5228□ctg6584□□WAG-104H17  
ctg5228□ctg6584□ctg2250□WAG-33H10  
ctg5228□ctg6584□ctg2250□WAG-52H23  
ctg5228□ctg6584□ctg2250□WAG-91A13  
ctg5228□ctg6584□ctg2250□WAG-114K12  
ctg5228□ctg6584□ctg3504□WAG-48O1  
ctg5228□ctg6584□ctg3504□WAG-55E24  
ctg5228□ctg6584□ctg3504□WAG-110E22  
ctg5228□ctg6584□ctg4415□WAG-39G7  
ctg5228□ctg6584□ctg4415□WAG-39G9  
ctg5228□ctg6584□ctg6067□WAG-36C13  
ctg5228□ctg6584□ctg6067□WAG-111C17  
ctg5228□ctg6584□ctg755□WAG-15A4  
ctg5228□ctg6584□ctg755□WAG-16F13  
ctg5228□ctg6584□ctg755□WAG-21M11  
ctg5228□ctg6584□ctg755□WAG-44O7  
ctg5228□ctg6584□ctg755□WAG-53C5  
ctg5228□ctg6584□ctg755□WAG-68N1  
ctg5228□ctg6584□ctg755□WAG-83L24  
ctg5228□ctg6584□ctg755□WAG-99G16  
ctg5228□ctg6584□ctg755□WAG-107C23  
ctg5228□ctg6584□ctg755□WAG-107O11  
ctg5228□ctg6584□ctg755□WAG-109I12  
ctg5228□ctg6584□ctg755□WAG-114H5  
ctg5228□ctg6584□ctg755□WAG-118G9  
ctg5228□ctg6584□ctg755□WAG-118O7  
ctg523□ctg1152□ctg987□WAG-47B21  
ctg523□ctg1152□ctg987□WAG-67L11  
ctg523□ctg1152□ctg987□WAG-69N12  
ctg523□ctg1152□ctg987□WAG-87G17  
ctg523□ctg4845□ctg5121□WAG-48A9  
ctg523□ctg4845□ctg5121□WAG-115A20  
ctg524□ctg1467□□WAG-31A11  
ctg524□ctg1467□□WAG-56I2  
ctg524□ctg1467□□WAG-59A23  
ctg524□ctg1467□ctg1936□WAG-3J7  
ctg524□ctg1467□ctg1936□WAG-46B15  
ctg524□ctg1467□ctg1936□WAG-47J8

ctg524□ctg1467□ctg1936□WAG-63J1  
ctg524□ctg1467□ctg1936□WAG-65N9  
ctg524□ctg1467□ctg1936□WAG-67F2  
ctg524□ctg1467□ctg1936□WAG-71F2  
ctg524□ctg1467□ctg1936□WAG-102G10  
ctg525□□□WAG-46P10  
ctg525□ctg1313□ctg1163□WAG-2N1  
ctg525□ctg1313□ctg1163□WAG-40O10  
ctg525□ctg1313□ctg1163□WAG-65E13  
ctg525□ctg1313□ctg1163□WAG-95P2  
ctg525□ctg1313□ctg1163□WAG-127M11  
ctg525□ctg1313□ctg2019□WAG-16I13  
ctg525□ctg1313□ctg2019□WAG-57A24  
ctg525□ctg1313□ctg2019□WAG-70K18  
ctg525□ctg1313□ctg2019□WAG-89I13  
ctg525□ctg1313□ctg2019□WAG-122D19  
ctg526□ctg1355□□WAG-21H9  
ctg526□ctg1355□ctg2137□WAG-14E14  
ctg526□ctg1355□ctg2137□WAG-30H18  
ctg526□ctg1355□ctg2137□WAG-84E22  
ctg526□ctg1355□ctg2137□WAG-100L9  
ctg526□ctg1355□ctg2137□WAG-112F20  
ctg526□ctg1355□ctg2137□WAG-123I20  
ctg526□ctg1355□ctg3477□WAG-2I12  
ctg526□ctg1355□ctg3477□WAG-59J15  
ctg527□□□WAG-54D6  
ctg527□□□WAG-78L5  
ctg527□ctg1349□□WAG-78N24  
ctg527□ctg1349□ctg1573□WAG-30C12  
ctg527□ctg1349□ctg1573□WAG-85G21  
ctg527□ctg1349□ctg1573□WAG-86L12  
ctg527□ctg1349□ctg1573□WAG-86N6  
ctg527□ctg1349□ctg1573□WAG-100K10  
ctg527□ctg1349□ctg1573□WAG-108K18  
ctg528□ctg1397□ctg1623□WAG-10I12  
ctg528□ctg1397□ctg1623□WAG-24M19  
ctg528□ctg1397□ctg1623□WAG-40P23  
ctg528□ctg1397□ctg1623□WAG-48F4  
ctg528□ctg1397□ctg1623□WAG-57D21  
ctg528□ctg1397□ctg3010□WAG-18E13  
ctg528□ctg1397□ctg3010□WAG-60I17  
ctg528□ctg1397□ctg3010□WAG-69H16  
ctg529□□□WAG-2E12  
ctg529□□□WAG-2G17  
ctg529□□□WAG-100B14  
ctg529□ctg1265□ctg1102□WAG-16E7  
ctg529□ctg1265□ctg1102□WAG-66K20  
ctg529□ctg1265□ctg1102□WAG-69D20  
ctg529□ctg1265□ctg1102□WAG-79J10  
ctg529□ctg1265□ctg1102□WAG-87L4  
ctg529□ctg1265□ctg1102□WAG-103O24  
ctg529□ctg3197□ctg3223□WAG-12P9  
ctg529□ctg3197□ctg3223□WAG-42A7  
ctg529□ctg3197□ctg3223□WAG-79A10  
ctg53□□□WAG-31N18  
ctg53□ctg413□□WAG-12B7

ctg53□ctg413□□WAG-14A8  
ctg53□ctg413□□WAG-25N19  
ctg53□ctg413□□WAG-37K18  
ctg53□ctg413□□WAG-51G4  
ctg53□ctg413□□WAG-84O9  
ctg53□ctg413□ctg1558□WAG-10K12  
ctg53□ctg413□ctg1558□WAG-15L4  
ctg53□ctg413□ctg1558□WAG-31O8  
ctg53□ctg413□ctg1558□WAG-35J24  
ctg53□ctg413□ctg1558□WAG-43L10  
ctg53□ctg413□ctg1558□WAG-68L2  
ctg53□ctg413□ctg1558□WAG-74F2  
ctg53□ctg413□ctg1558□WAG-84D3  
ctg53□ctg413□ctg1558□WAG-106D8  
ctg530□□□WAG-62A15  
ctg530□ctg1361□□WAG-11C4  
ctg530□ctg1361□□WAG-49E20  
ctg530□ctg1361□ctg2753□WAG-5E5  
ctg530□ctg1361□ctg2753□WAG-60F6  
ctg530□ctg1361□ctg2753□WAG-92B22  
ctg530□ctg1361□ctg2753□WAG-93M12  
ctg530□ctg1361□ctg2753□WAG-130L1  
ctg530□ctg1361□ctg5848□WAG-31G8  
ctg530□ctg1361□ctg5848□WAG-99H10  
ctg530□ctg4897□ctg5222□WAG-62P17  
ctg530□ctg4897□ctg5222□WAG-97M14  
ctg531□□□WAG-22F20  
ctg531□□□WAG-29L16  
ctg531□□□WAG-61L19  
ctg531□□□WAG-72I17  
ctg531□□□WAG-84E8  
ctg531□□□WAG-90A14  
ctg531□ctg1672□□WAG-37B10  
ctg531□ctg1672□□WAG-70D23  
ctg531□ctg1672□□WAG-98F20  
ctg531□ctg1672□□WAG-103A15  
ctg531□ctg1672□ctg1802□WAG-20I16  
ctg531□ctg1672□ctg1802□WAG-29K7  
ctg531□ctg1672□ctg1802□WAG-41C12  
ctg531□ctg1672□ctg1802□WAG-77K2  
ctg531□ctg1672□ctg1802□WAG-84N22  
ctg531□ctg1672□ctg1954□WAG-74G22  
ctg531□ctg1672□ctg1954□WAG-86N7  
ctg531□ctg1672□ctg1954□WAG-102E14  
ctg531□ctg1672□ctg1954□WAG-112N23  
ctg531□ctg1672□ctg5656□WAG-35D15  
ctg531□ctg1672□ctg5656□WAG-105J17  
ctg532□□□WAG-67K16  
ctg532□□□WAG-122P10  
ctg532□ctg1964□□WAG-96P16  
ctg532□ctg1964□ctg1809□WAG-46F4  
ctg532□ctg1964□ctg1809□WAG-46J5  
ctg532□ctg1964□ctg1809□WAG-48M6  
ctg532□ctg1964□ctg1809□WAG-60J10  
ctg532□ctg1964□ctg1809□WAG-78O19  
ctg532□ctg1964□ctg4878□WAG-68L16

ctg532□ctg1964□ctg4878□WAG-116N14  
ctg532□ctg6049□□WAG-28D10  
ctg532□ctg6049□□WAG-84D11  
ctg533□□□WAG-92O23  
ctg533□ctg1404□□WAG-130I18  
ctg533□ctg1404□ctg1585□WAG-12F4  
ctg533□ctg1404□ctg1585□WAG-19J20  
ctg533□ctg1404□ctg1585□WAG-50I15  
ctg533□ctg1404□ctg1585□WAG-89J3  
ctg533□ctg1404□ctg1585□WAG-125B13  
ctg533□ctg3160□ctg4317□WAG-40C19  
ctg533□ctg3160□ctg4317□WAG-113H21  
ctg533□ctg3160□ctg6416□WAG-48C6  
ctg533□ctg3160□ctg6416□WAG-103J13  
ctg533□ctg3850□□WAG-65L19  
ctg533□ctg3850□ctg4121□WAG-28J8  
ctg533□ctg3850□ctg4121□WAG-65J3  
ctg533□ctg3850□ctg4121□WAG-70D5  
ctg534□ctg1161□ctg1000□WAG-94C16  
ctg534□ctg1161□ctg1000□WAG-108B15  
ctg534□ctg1161□ctg1000□WAG-108B17  
ctg534□ctg1161□ctg1000□WAG-129H7  
ctg535□□□WAG-10N11  
ctg535□□□WAG-27G17  
ctg535□□□WAG-35M5  
ctg535□□□WAG-121A5  
ctg535□ctg1640□ctg1978□WAG-14F11  
ctg535□ctg1640□ctg1978□WAG-26J20  
ctg535□ctg1640□ctg1978□WAG-46H7  
ctg535□ctg1640□ctg1978□WAG-72G24  
ctg535□ctg1640□ctg1978□WAG-124J18  
ctg536□□□WAG-63M4  
ctg536□□□WAG-75P10  
ctg536□□□WAG-77P15  
ctg536□ctg1648□ctg1505□WAG-47D7  
ctg536□ctg1648□ctg1505□WAG-57N7  
ctg536□ctg1648□ctg1505□WAG-71B13  
ctg536□ctg1648□ctg1505□WAG-79P17  
ctg536□ctg1648□ctg1505□WAG-85I18  
ctg536□ctg1648□ctg1505□WAG-98G14  
ctg537□□□WAG-1L24  
ctg537□□□WAG-13I19  
ctg537□ctg1177□□WAG-11H19  
ctg537□ctg1177□ctg1222□WAG-17K15  
ctg537□ctg1177□ctg1222□WAG-43J22  
ctg537□ctg1177□ctg1222□WAG-84D13  
ctg537□ctg1177□ctg1222□WAG-108D8  
ctg537□ctg1177□ctg1222□WAG-118H24  
ctg538□ctg1172□□WAG-5P7  
ctg538□ctg1172□□WAG-29C12  
ctg538□ctg1172□□WAG-32H2  
ctg538□ctg1172□□WAG-60A14  
ctg538□ctg1172□□WAG-81D7  
ctg538□ctg1172□ctg2237□WAG-101M3  
ctg538□ctg1172□ctg2237□WAG-127K23  
ctg538□ctg1172□ctg2237□WAG-129I4

ctg538□ctg1172□ctg3727□WAG-20N17  
ctg538□ctg1172□ctg3727□WAG-40E21  
ctg538□ctg1172□ctg3727□WAG-116D21  
ctg538□ctg1172□ctg3727□WAG-130D13  
ctg539□□□WAG-41O19  
ctg539□□□WAG-110M15  
ctg539□ctg1937□ctg1777□WAG-71P2  
ctg539□ctg1937□ctg1777□WAG-109L14  
ctg539□ctg1937□ctg1777□WAG-121I18  
ctg539□ctg1937□ctg1777□WAG-126F21  
ctg539□ctg2633□□WAG-49P22  
ctg539□ctg2633□□WAG-108G2  
ctg539□ctg2633□ctg3324□WAG-18N2  
ctg539□ctg2633□ctg3324□WAG-43G5  
ctg539□ctg2633□ctg3324□WAG-88J23  
ctg539□ctg2633□ctg3324□WAG-100J14  
ctg539□ctg3338□ctg3398□WAG-57I3  
ctg539□ctg3338□ctg3398□WAG-85B17  
ctg539□ctg3338□ctg3398□WAG-125O22  
ctg539□ctg6433□□WAG-59E4  
ctg539□ctg6433□□WAG-68G14  
ctg54□□□WAG-11D19  
ctg54□ctg195□ctg205□WAG-4C18  
ctg54□ctg195□ctg205□WAG-20G14  
ctg54□ctg195□ctg205□WAG-23B2  
ctg54□ctg195□ctg205□WAG-31K15  
ctg54□ctg195□ctg205□WAG-47G5  
ctg54□ctg195□ctg205□WAG-88M9  
ctg54□ctg195□ctg205□WAG-104D1  
ctg54□ctg195□ctg205□WAG-117I17  
ctg54□ctg195□ctg205□WAG-126P7  
ctg54□ctg195□ctg205□WAG-130L6  
ctg54□ctg3969□□WAG-26L17  
ctg54□ctg3969□□WAG-80I10  
ctg54□ctg3969□ctg5440□WAG-106M5  
ctg54□ctg3969□ctg5440□WAG-114L6  
ctg540□ctg1175□□WAG-95E24  
ctg540□ctg1175□□WAG-106J4  
ctg540□ctg1175□ctg1364□WAG-29E23  
ctg540□ctg1175□ctg1364□WAG-60H13  
ctg540□ctg1175□ctg1364□WAG-79L21  
ctg540□ctg1175□ctg1364□WAG-89O7  
ctg540□ctg1175□ctg1364□WAG-106K2  
ctg541□□□WAG-49L21  
ctg541□□□WAG-58E8  
ctg541□ctg1408□ctg1590□WAG-3F5  
ctg541□ctg1408□ctg1590□WAG-3P10  
ctg541□ctg1408□ctg1590□WAG-24D3  
ctg541□ctg1408□ctg1590□WAG-42M13  
ctg541□ctg1408□ctg1590□WAG-54G12  
ctg541□ctg1408□ctg1590□WAG-127D11  
ctg542□ctg1622□ctg1653□WAG-15E16  
ctg542□ctg1622□ctg1653□WAG-30K16  
ctg542□ctg1622□ctg1653□WAG-56C6  
ctg542□ctg1622□ctg1653□WAG-74J3  
ctg542□ctg1622□ctg1653□WAG-79N21



ctg542□ctg1622□ctg1653□WAG-121J20  
ctg542□ctg1622□ctg6018□WAG-36H22  
ctg542□ctg1622□ctg6018□WAG-79E13  
ctg543□ctg1434□□WAG-72J8  
ctg543□ctg1434□ctg1945□WAG-48E13  
ctg543□ctg1434□ctg1945□WAG-54E13  
ctg543□ctg1434□ctg1945□WAG-66E20  
ctg543□ctg1434□ctg1945□WAG-89K16  
ctg543□ctg1434□ctg1945□WAG-103J15  
ctg543□ctg1434□ctg1945□WAG-105B20  
ctg543□ctg1434□ctg1945□WAG-120N24  
ctg543□ctg1434□ctg1945□WAG-120O4  
ctg543□ctg1434□ctg2804□WAG-E1  
ctg543□ctg1434□ctg2804□WAG-67L18  
ctg543□ctg1434□ctg2804□WAG-123J14  
ctg544□□□WAG-110A10  
ctg544□ctg1185□ctg1372□WAG-15J3  
ctg544□ctg1185□ctg1372□WAG-30I4  
ctg544□ctg1185□ctg1372□WAG-45D8  
ctg544□ctg1185□ctg1372□WAG-53L9  
ctg544□ctg1185□ctg1372□WAG-62M18  
ctg544□ctg1185□ctg1372□WAG-67E12  
ctg545□□□WAG-72K5  
ctg545□ctg1400□□WAG-38H2  
ctg545□ctg1400□ctg1249□WAG-5A13  
ctg545□ctg1400□ctg1249□WAG-18M8  
ctg545□ctg1400□ctg1249□WAG-61F22  
ctg545□ctg1400□ctg1249□WAG-110H4  
ctg545□ctg1400□ctg1249□WAG-118D13  
ctg546□ctg1188□□WAG-83K24  
ctg546□ctg1188□ctg1031□WAG-30F19  
ctg546□ctg1188□ctg1031□WAG-40H11  
ctg546□ctg1188□ctg1031□WAG-48L17  
ctg546□ctg1188□ctg1031□WAG-69D7  
ctg546□ctg1188□ctg1031□WAG-104O16  
ctg547□ctg1191□ctg1035□WAG-26K15  
ctg547□ctg1191□ctg1035□WAG-74P11  
ctg547□ctg1191□ctg1035□WAG-99L10  
ctg547□ctg1191□ctg1035□WAG-121I9  
ctg548□□□WAG-39G4  
ctg548□ctg1448□ctg1298□WAG-9N1  
ctg548□ctg1448□ctg1298□WAG-33E8  
ctg548□ctg1448□ctg1298□WAG-53L19  
ctg548□ctg1448□ctg1298□WAG-98M3  
ctg548□ctg1448□ctg1298□WAG-120F17  
ctg548□ctg1448□ctg1298□WAG-123K22  
ctg549□ctg1194□ctg1060□WAG-9D22  
ctg549□ctg1194□ctg1060□WAG-29F12  
ctg549□ctg1194□ctg1060□WAG-85O15  
ctg549□ctg1194□ctg1060□WAG-89K13  
ctg549□ctg1194□ctg1060□WAG-123M9  
ctg55□□□WAG-7N6  
ctg55□□□WAG-107O18  
ctg55□ctg3332□□WAG-53G17  
ctg55□ctg3332□ctg4269□WAG-19H7  
ctg55□ctg3332□ctg4269□WAG-40J13

ctg55□ctg3332□ctg4269□WAG-129K3  
ctg55□ctg409□□WAG-36K16  
ctg55□ctg409□ctg1065□WAG-M19  
ctg55□ctg409□ctg1065□WAG-2A1  
ctg55□ctg409□ctg1065□WAG-2K5  
ctg55□ctg409□ctg1065□WAG-17N3  
ctg55□ctg409□ctg1065□WAG-29I4  
ctg55□ctg409□ctg1065□WAG-30L12  
ctg55□ctg409□ctg1065□WAG-31M8  
ctg55□ctg409□ctg1065□WAG-37E10  
ctg55□ctg409□ctg1065□WAG-74H10  
ctg55□ctg409□ctg1065□WAG-85L13  
ctg55□ctg409□ctg1065□WAG-90C3  
ctg55□ctg409□ctg1065□WAG-91E10  
ctg55□ctg409□ctg1065□WAG-93B9  
ctg55□ctg409□ctg1065□WAG-102E15  
ctg55□ctg409□ctg1065□WAG-120M4  
ctg55□ctg409□ctg1065□WAG-124E3  
ctg55□ctg409□ctg1065□WAG-126O7  
ctg550□□□WAG-32A2  
ctg550□□□WAG-33C1  
ctg550□□□WAG-54B7  
ctg550□□□WAG-70B20  
ctg550□□□WAG-96J9  
ctg550□□□WAG-123E2  
ctg550□□□WAG-125H19  
ctg550□ctg1832□□WAG-32I14  
ctg550□ctg1832□□WAG-36C17  
ctg550□ctg1832□ctg2234□WAG-18G13  
ctg550□ctg1832□ctg2234□WAG-37G15  
ctg550□ctg1832□ctg2234□WAG-40C12  
ctg550□ctg1832□ctg2234□WAG-41O7  
ctg550□ctg1832□ctg2234□WAG-52N19  
ctg550□ctg1832□ctg2234□WAG-71J16  
ctg550□ctg2349□□WAG-46I5  
ctg550□ctg2349□□WAG-58M6  
ctg550□ctg2349□ctg3051□WAG-24M10  
ctg550□ctg2349□ctg3051□WAG-44C2  
ctg550□ctg2349□ctg3051□WAG-112M1  
ctg550□ctg2349□ctg5344□WAG-52C15  
ctg550□ctg2349□ctg5344□WAG-89F23  
ctg550□ctg4820□ctg5087□WAG-1P15  
ctg550□ctg4820□ctg5087□WAG-51K21  
ctg550□ctg5382□ctg6345□WAG-17O18  
ctg550□ctg5382□ctg6345□WAG-28P23  
ctg550□ctg5428□ctg6451□WAG-76N1  
ctg550□ctg5428□ctg6451□WAG-110F17  
ctg550□ctg5933□□WAG-13K7  
ctg550□ctg5933□□WAG-37H13  
ctg551□□□WAG-5B5  
ctg551□□□WAG-112L4  
ctg551□□□WAG-119F8  
ctg551□ctg2045□□WAG-70H3  
ctg551□ctg2045□□WAG-100G14  
ctg551□ctg2045□□WAG-123A5  
ctg551□ctg2045□ctg1905□WAG-50A24

ctg551□ctg2045□ctg1905□WAG-57E6  
ctg551□ctg2045□ctg1905□WAG-92K11  
ctg551□ctg2045□ctg1905□WAG-99M2  
ctg551□ctg2045□ctg3571□WAG-25D15  
ctg551□ctg2045□ctg3571□WAG-66G23  
ctg551□ctg2045□ctg3571□WAG-105G8  
ctg551□ctg2045□ctg4599□WAG-2B18  
ctg551□ctg2045□ctg4599□WAG-3B23  
ctg552□□□WAG-12O15  
ctg552□ctg1398□□WAG-62G8  
ctg552□ctg1398□□WAG-108M22  
ctg552□ctg1398□ctg2644□WAG-33H19  
ctg552□ctg1398□ctg2644□WAG-40B5  
ctg552□ctg1398□ctg2644□WAG-48N2  
ctg552□ctg1398□ctg2644□WAG-64I21  
ctg552□ctg1398□ctg2644□WAG-94B9  
ctg552□ctg1398□ctg2644□WAG-96P13  
ctg552□ctg1398□ctg2644□WAG-127N11  
ctg552□ctg1398□ctg4620□WAG-44O19  
ctg552□ctg1398□ctg4620□WAG-97E3  
ctg553□ctg1206□ctg1052□WAG-17A6  
ctg553□ctg1206□ctg1052□WAG-50I20  
ctg553□ctg1206□ctg1052□WAG-58P7  
ctg553□ctg1206□ctg1052□WAG-68H24  
ctg553□ctg1206□ctg1052□WAG-100I10  
ctg553□ctg1206□ctg1052□WAG-127P4  
ctg554□ctg1414□ctg3338□WAG-8H5  
ctg554□ctg1414□ctg3338□WAG-54E19  
ctg554□ctg1414□ctg3338□WAG-67L6  
ctg554□ctg1414□ctg3946□WAG-59D1  
ctg554□ctg1414□ctg3946□WAG-68O21  
ctg554□ctg1414□ctg3946□WAG-106L15  
ctg554□ctg1414□ctg3946□WAG-109L18  
ctg554□ctg1414□ctg6755□WAG-20A3  
ctg554□ctg1414□ctg6755□WAG-52H14  
ctg555□□□WAG-12E12  
ctg555□ctg1387□ctg1232□WAG-11J15  
ctg555□ctg1387□ctg1232□WAG-26P11  
ctg555□ctg1387□ctg1232□WAG-41C24  
ctg555□ctg1387□ctg1232□WAG-110P17  
ctg555□ctg1387□ctg1232□WAG-126B12  
ctg555□ctg1387□ctg1232□WAG-126H22  
ctg555□ctg3161□□WAG-103M1  
ctg555□ctg3161□ctg4322□WAG-70J12  
ctg555□ctg3161□ctg4322□WAG-87C5  
ctg555□ctg6036□ctg6960□WAG-66A19  
ctg555□ctg6036□ctg6960□WAG-66E24  
ctg556□ctg1209□□WAG-74L6  
ctg556□ctg1209□ctg1055□WAG-8D1  
ctg556□ctg1209□ctg1055□WAG-8E1  
ctg556□ctg1209□ctg1055□WAG-97P2  
ctg556□ctg1209□ctg1055□WAG-104P20  
ctg556□ctg1209□ctg1055□WAG-127N24  
ctg557□□□WAG-49E4  
ctg557□ctg1222□□WAG-130G16  
ctg557□ctg1222□ctg1306□WAG-32F11

ctg557□ctg1222□ctg1306□WAG-49L22  
ctg557□ctg1222□ctg1306□WAG-68J10  
ctg557□ctg1222□ctg1306□WAG-100G11  
ctg557□ctg1222□ctg1306□WAG-111L2  
ctg558□ctg1720□□WAG-5E18  
ctg558□ctg1720□□WAG-13C3  
ctg558□ctg1720□□WAG-110J11  
ctg558□ctg1720□ctg3760□WAG-57F24  
ctg558□ctg1720□ctg3760□WAG-59O10  
ctg558□ctg1720□ctg3760□WAG-69E3  
ctg558□ctg1720□ctg3760□WAG-96M10  
ctg558□ctg1720□ctg3760□WAG-106D3  
ctg558□ctg1720□ctg5118□WAG-19L24  
ctg558□ctg1720□ctg5118□WAG-74K23  
ctg559□ctg1224□ctg1359□WAG-16D12  
ctg559□ctg1224□ctg1359□WAG-50K1  
ctg559□ctg1224□ctg1359□WAG-66F9  
ctg559□ctg1224□ctg1359□WAG-80O22  
ctg559□ctg1224□ctg1359□WAG-101N11  
ctg559□ctg1224□ctg1359□WAG-107B23  
ctg559□ctg1224□ctg1359□WAG-120H9  
ctg56□ctg293□□WAG-23L1  
ctg56□ctg293□□WAG-125O11  
ctg56□ctg293□ctg381□WAG-30H12  
ctg56□ctg293□ctg381□WAG-48E18  
ctg56□ctg293□ctg381□WAG-68K19  
ctg56□ctg293□ctg381□WAG-102I18  
ctg56□ctg293□ctg381□WAG-120G5  
ctg56□ctg293□ctg381□WAG-123P18  
ctg56□ctg293□ctg381□WAG-127K7  
ctg560□ctg2417□ctg2321□WAG-3P9  
ctg560□ctg2417□ctg2321□WAG-42N14  
ctg560□ctg2417□ctg2321□WAG-57K19  
ctg560□ctg2417□ctg2321□WAG-99A6  
ctg560□ctg2417□ctg2321□WAG-122N3  
ctg560□ctg2925□□WAG-47A16  
ctg560□ctg2925□ctg2896□WAG-18K5  
ctg560□ctg2925□ctg2896□WAG-82I23  
ctg560□ctg2925□ctg2896□WAG-103O10  
ctg560□ctg5207□ctg5938□WAG-28A18  
ctg560□ctg5207□ctg5938□WAG-122C9  
ctg561□□□WAG-13M2  
ctg561□ctg1435□ctg1678□WAG-71E19  
ctg561□ctg1435□ctg1678□WAG-75B21  
ctg561□ctg1435□ctg1678□WAG-92G17  
ctg561□ctg1435□ctg1678□WAG-93N21  
ctg561□ctg1435□ctg1678□WAG-100O15  
ctg561□ctg1435□ctg1678□WAG-118M10  
ctg561□ctg1435□ctg1678□WAG-126H20  
ctg562□□□WAG-76O14  
ctg562□ctg1788□□WAG-19P16  
ctg562□ctg1788□□WAG-34P10  
ctg562□ctg1788□ctg2613□WAG-22B6  
ctg562□ctg1788□ctg2613□WAG-48F5  
ctg562□ctg1788□ctg2613□WAG-70J14  
ctg562□ctg1788□ctg2613□WAG-73A17

ctg562□ctg1788□ctg2717□WAG-28I5  
ctg562□ctg1788□ctg2717□WAG-75F8  
ctg562□ctg1788□ctg2717□WAG-84L10  
ctg562□ctg1788□ctg2717□WAG-90F12  
ctg562□ctg1788□ctg2717□WAG-108J14  
ctg563□ctg1593□ctg1902□WAG-7B20  
ctg563□ctg1593□ctg1902□WAG-10P20  
ctg563□ctg1593□ctg1902□WAG-29I12  
ctg563□ctg1593□ctg1902□WAG-57H13  
ctg563□ctg1593□ctg1902□WAG-61B10  
ctg563□ctg1593□ctg1902□WAG-80A24  
ctg563□ctg1593□ctg1902□WAG-99M13  
ctg563□ctg1593□ctg1902□WAG-115A18  
ctg564□ctg1232□□WAG-115F4  
ctg564□ctg1232□ctg1374□WAG-78E18  
ctg564□ctg1232□ctg1374□WAG-86E20  
ctg564□ctg1232□ctg1374□WAG-101K7  
ctg564□ctg1232□ctg1374□WAG-116J21  
ctg565□ctg1234□ctg1375□WAG-12L19  
ctg565□ctg1234□ctg1375□WAG-47L13  
ctg565□ctg1234□ctg1375□WAG-75D17  
ctg565□ctg1234□ctg1375□WAG-119G21  
ctg565□ctg1234□ctg1375□WAG-130J5  
ctg566□□□WAG-103I6  
ctg566□ctg1454□□WAG-42I8  
ctg566□ctg1454□□WAG-104C18  
ctg566□ctg1454□ctg2310□WAG-30H1  
ctg566□ctg1454□ctg2310□WAG-49I11  
ctg566□ctg1454□ctg2310□WAG-79H24  
ctg566□ctg1454□ctg2310□WAG-116D17  
ctg566□ctg1454□ctg2310□WAG-122C15  
ctg566□ctg1454□ctg4831□WAG-4A13  
ctg566□ctg1454□ctg4831□WAG-4C9  
ctg567□ctg1244□ctg1450□WAG-25A7  
ctg567□ctg1244□ctg1450□WAG-43G8  
ctg567□ctg1244□ctg1450□WAG-104M6  
ctg567□ctg1244□ctg1450□WAG-118O22  
ctg567□ctg1244□ctg1450□WAG-130D7  
ctg568□□□WAG-33B20  
ctg568□ctg2048□ctg1909□WAG-8E13  
ctg568□ctg2048□ctg1909□WAG-14F7  
ctg568□ctg2048□ctg1909□WAG-47J19  
ctg568□ctg2048□ctg1909□WAG-88H13  
ctg568□ctg5989□□WAG-18A7  
ctg568□ctg5989□□WAG-31I17  
ctg569□□□WAG-2I20  
ctg569□□□WAG-47P11  
ctg569□ctg1501□□WAG-30O24  
ctg569□ctg1501□ctg1350□WAG-33J10  
ctg569□ctg1501□ctg1350□WAG-105O3  
ctg569□ctg1501□ctg1350□WAG-115G16  
ctg569□ctg1501□ctg1350□WAG-119K16  
ctg569□ctg1501□ctg1350□WAG-128H2  
ctg57□□□WAG-16J5  
ctg57□□□WAG-85F20  
ctg57□ctg1211□□WAG-31I23

ctg57□ctg1211□□WAG-52E7  
ctg57□ctg1211□□WAG-81J17  
ctg57□ctg1211□□WAG-121A9  
ctg57□ctg1211□ctg1351□WAG-3F13  
ctg57□ctg1211□ctg1351□WAG-90C23  
ctg57□ctg1211□ctg1351□WAG-121N9  
ctg57□ctg1211□ctg5569□WAG-51D13  
ctg57□ctg1211□ctg5569□WAG-85A13  
ctg57□ctg243□ctg2607□WAG-21P12  
ctg57□ctg243□ctg2607□WAG-33D16  
ctg57□ctg243□ctg2607□WAG-87M16  
ctg57□ctg243□ctg2607□WAG-120E21  
ctg57□ctg243□ctg322□WAG-10D20  
ctg57□ctg243□ctg322□WAG-16B8  
ctg57□ctg243□ctg322□WAG-23E22  
ctg57□ctg243□ctg322□WAG-41J9  
ctg57□ctg243□ctg322□WAG-56A5  
ctg57□ctg243□ctg322□WAG-56M10  
ctg57□ctg243□ctg322□WAG-69G22  
ctg57□ctg243□ctg322□WAG-70C14  
ctg57□ctg243□ctg322□WAG-102B8  
ctg57□ctg243□ctg322□WAG-121L15  
ctg570□ctg1256□ctg1097□WAG-45D12  
ctg570□ctg1256□ctg1097□WAG-64B11  
ctg570□ctg1256□ctg1097□WAG-117I5  
ctg570□ctg1256□ctg1097□WAG-127E23  
ctg571□□□WAG-73C21  
ctg571□ctg1262□ctg1099□WAG-22A10  
ctg571□ctg1262□ctg1099□WAG-46B13  
ctg571□ctg1262□ctg1099□WAG-70O5  
ctg571□ctg1262□ctg1099□WAG-94I1  
ctg571□ctg1262□ctg1099□WAG-96O12  
ctg571□ctg1262□ctg1099□WAG-102M9  
ctg572□ctg1362□ctg1587□WAG-9J3  
ctg572□ctg1362□ctg1587□WAG-71O20  
ctg572□ctg1362□ctg1587□WAG-102J6  
ctg572□ctg1362□ctg1587□WAG-116N13  
ctg572□ctg1362□ctg4977□WAG-27P20  
ctg572□ctg1362□ctg4977□WAG-50O14  
ctg573□□□WAG-39B22  
ctg573□□□WAG-99K4  
ctg573□ctg1780□ctg1614□WAG-18M10  
ctg573□ctg1780□ctg1614□WAG-41H24  
ctg573□ctg1780□ctg1614□WAG-72N9  
ctg573□ctg1780□ctg1614□WAG-120O15  
ctg573□ctg1780□ctg1614□WAG-127L23  
ctg573□ctg1780□ctg5425□WAG-14A15  
ctg573□ctg1780□ctg5425□WAG-29J7  
ctg574□□□WAG-13E13  
ctg574□ctg1471□ctg1322□WAG-31J3  
ctg574□ctg1471□ctg1322□WAG-81E4  
ctg574□ctg1471□ctg1322□WAG-113L17  
ctg574□ctg1471□ctg1322□WAG-124B12  
ctg574□ctg5126□ctg5753□WAG-75O5  
ctg574□ctg5126□ctg5753□WAG-118F17  
ctg574□ctg5516□ctg6635□WAG-13M22

ctg574□ctg5516□ctg6635□WAG-70B21  
ctg575□ctg1514□□WAG-46L20  
ctg575□ctg1514□□WAG-61L21  
ctg575□ctg1514□□WAG-93O4  
ctg575□ctg1514□ctg2338□WAG-78O5  
ctg575□ctg1514□ctg2338□WAG-80C8  
ctg575□ctg1514□ctg2338□WAG-108L1  
ctg575□ctg1514□ctg2338□WAG-118P11  
ctg576□ctg1702□ctg1985□WAG-29D1  
ctg576□ctg1702□ctg1985□WAG-49F13  
ctg576□ctg1702□ctg1985□WAG-77C19  
ctg576□ctg1702□ctg1985□WAG-101C10  
ctg576□ctg1702□ctg1985□WAG-111M3  
ctg576□ctg1702□ctg1985□WAG-114P5  
ctg576□ctg2168□□WAG-54A17  
ctg576□ctg2168□ctg2747□WAG-63K2  
ctg576□ctg2168□ctg2747□WAG-73D14  
ctg576□ctg2168□ctg2747□WAG-103L8  
ctg577□ctg1510□ctg1586□WAG-25F24  
ctg577□ctg1510□ctg1586□WAG-30P8  
ctg577□ctg1510□ctg1586□WAG-37J23  
ctg577□ctg1510□ctg1586□WAG-54O6  
ctg577□ctg1510□ctg1586□WAG-55P19  
ctg577□ctg1510□ctg1586□WAG-81C9  
ctg577□ctg1510□ctg1586□WAG-97N24  
ctg578□□□WAG-91C3  
ctg578□ctg1279□ctg1898□WAG-14H1  
ctg578□ctg1279□ctg1898□WAG-23B24  
ctg578□ctg1279□ctg1898□WAG-55L4  
ctg578□ctg1279□ctg1898□WAG-60J6  
ctg578□ctg1279□ctg1898□WAG-92L13  
ctg578□ctg1279□ctg1898□WAG-101D13  
ctg578□ctg1279□ctg1898□WAG-118I15  
ctg578□ctg3158□ctg3179□WAG-1M17  
ctg578□ctg3158□ctg3179□WAG-18O14  
ctg578□ctg3158□ctg3179□WAG-25D14  
ctg579□ctg1530□□WAG-48L7  
ctg579□ctg1530□ctg1823□WAG-23M19  
ctg579□ctg1530□ctg1823□WAG-49L15  
ctg579□ctg1530□ctg1823□WAG-83A5  
ctg579□ctg1530□ctg1823□WAG-88E10  
ctg579□ctg1530□ctg1823□WAG-113C15  
ctg58□□□WAG-68C2  
ctg58□ctg257□ctg338□WAG-20B24  
ctg58□ctg257□ctg338□WAG-21M16  
ctg58□ctg257□ctg338□WAG-24F23  
ctg58□ctg257□ctg338□WAG-29F14  
ctg58□ctg257□ctg338□WAG-46B1  
ctg58□ctg257□ctg338□WAG-50B18  
ctg58□ctg257□ctg338□WAG-63B14  
ctg58□ctg257□ctg338□WAG-79C1  
ctg58□ctg257□ctg338□WAG-86A4  
ctg58□ctg2915□□WAG-23K23  
ctg58□ctg2915□□WAG-28B7  
ctg58□ctg2915□□WAG-84J5  
ctg58□ctg2915□□WAG-101N24

ctg58□ctg2915□□WAG-119E19  
ctg58□ctg2915□ctg3995□WAG-1E23  
ctg58□ctg2915□ctg3995□WAG-72H12  
ctg58□ctg2915□ctg3995□WAG-101N19  
ctg580□ctg1284□ctg2116□WAG-28K1  
ctg580□ctg1284□ctg2116□WAG-49L5  
ctg580□ctg1284□ctg2116□WAG-52K2  
ctg580□ctg1284□ctg2116□WAG-82E6  
ctg580□ctg1284□ctg5658□WAG-19E1  
ctg580□ctg1284□ctg5658□WAG-99E6  
ctg581□□□WAG-7H3  
ctg581□□□WAG-34C13  
ctg581□ctg1752□ctg2075□WAG-9H15  
ctg581□ctg1752□ctg2075□WAG-14G18  
ctg581□ctg1752□ctg2075□WAG-74O7  
ctg581□ctg1752□ctg2075□WAG-97M24  
ctg581□ctg1752□ctg6350□WAG-4B7  
ctg581□ctg1752□ctg6350□WAG-4M10  
ctg582□□□WAG-49J13  
ctg582□□□WAG-57H8  
ctg582□ctg1542□□WAG-25H9  
ctg582□ctg1542□ctg1831□WAG-28N10  
ctg582□ctg1542□ctg1831□WAG-31P11  
ctg582□ctg1542□ctg1831□WAG-43H18  
ctg582□ctg1542□ctg1831□WAG-51J3  
ctg582□ctg1542□ctg1831□WAG-104E4  
ctg582□ctg1542□ctg1831□WAG-111N5  
ctg582□ctg1542□ctg1831□WAG-122I15  
ctg582□ctg1542□ctg1831□WAG-129A7  
ctg583□ctg1546□□WAG-25A4  
ctg583□ctg1546□□WAG-35B22  
ctg583□ctg1546□ctg1755□WAG-42I7  
ctg583□ctg1546□ctg1755□WAG-49P14  
ctg583□ctg1546□ctg1755□WAG-76P6  
ctg583□ctg1546□ctg1755□WAG-80C15  
ctg583□ctg1546□ctg1755□WAG-102O13  
ctg583□ctg1546□ctg3447□WAG-61D4  
ctg583□ctg1546□ctg3447□WAG-67J15  
ctg583□ctg1546□ctg3447□WAG-103M10  
ctg584□□□WAG-24E17  
ctg584□□□WAG-38M20  
ctg584□ctg1574□□WAG-95D21  
ctg584□ctg1574□ctg1420□WAG-36F4  
ctg584□ctg1574□ctg1420□WAG-37F21  
ctg584□ctg1574□ctg1420□WAG-73P19  
ctg584□ctg1574□ctg1420□WAG-79G9  
ctg584□ctg1574□ctg1420□WAG-126D7  
ctg585□ctg1492□ctg1341□WAG-1D14  
ctg585□ctg1492□ctg1341□WAG-30C17  
ctg585□ctg1492□ctg1341□WAG-91C13  
ctg585□ctg1492□ctg1341□WAG-92M21  
ctg585□ctg1492□ctg1341□WAG-108D21  
ctg585□ctg1492□ctg1341□WAG-116L24  
ctg585□ctg1712□□WAG-11J16  
ctg585□ctg1712□□WAG-14C18  
ctg585□ctg1712□□WAG-55C2



ctg585□ctg1712□□WAG-94H22  
ctg585□ctg1712□□WAG-100F12  
ctg585□ctg1712□ctg1834□WAG-21F18  
ctg585□ctg1712□ctg1834□WAG-26E9  
ctg585□ctg1712□ctg1834□WAG-56C18  
ctg585□ctg1712□ctg1834□WAG-59P7  
ctg586□□□WAG-68P5  
ctg586□□□WAG-117F16  
ctg586□ctg1294□ctg2519□WAG-19J1  
ctg586□ctg1294□ctg2519□WAG-38O10  
ctg586□ctg1294□ctg2519□WAG-52A8  
ctg586□ctg1294□ctg2519□WAG-58O6  
ctg586□ctg1294□ctg2519□WAG-98I14  
ctg586□ctg1294□ctg2519□WAG-101K19  
ctg586□ctg1294□ctg2519□WAG-110A6  
ctg586□ctg3247□ctg3285□WAG-9K7  
ctg586□ctg3247□ctg3285□WAG-120B8  
ctg586□ctg3247□ctg3285□WAG-129I20  
ctg587□□□WAG-23L16  
ctg587□□□WAG-114K4  
ctg587□ctg1395□□WAG-113G16  
ctg587□ctg1395□ctg1568□WAG-33C9  
ctg587□ctg1395□ctg1568□WAG-95D11  
ctg587□ctg1395□ctg1568□WAG-96H13  
ctg587□ctg1978□□WAG-8B7  
ctg587□ctg1978□ctg2485□WAG-21G2  
ctg587□ctg1978□ctg2485□WAG-58G5  
ctg587□ctg1978□ctg2485□WAG-81D15  
ctg587□ctg1978□ctg2485□WAG-111F9  
ctg587□ctg1978□ctg2485□WAG-111F24  
ctg587□ctg2124□□WAG-83G14  
ctg587□ctg2124□ctg1994□WAG-95J8  
ctg587□ctg2124□ctg1994□WAG-97I8  
ctg587□ctg2124□ctg1994□WAG-130H14  
ctg588□ctg1550□□WAG-66A21  
ctg588□ctg1550□ctg1395□WAG-26I19  
ctg588□ctg1550□ctg1395□WAG-83I22  
ctg588□ctg1550□ctg1395□WAG-99B21  
ctg588□ctg1550□ctg1395□WAG-120P1  
ctg588□ctg1550□ctg1395□WAG-123O13  
ctg589□□□WAG-72L17  
ctg589□□□WAG-107C21  
ctg589□□□WAG-125G19  
ctg589□ctg1297□ctg1148□WAG-44O4  
ctg589□ctg1297□ctg1148□WAG-61E1  
ctg589□ctg1297□ctg1148□WAG-72O3  
ctg589□ctg1297□ctg1148□WAG-99J22  
ctg589□ctg1297□ctg1148□WAG-123F24  
ctg589□ctg6041□□WAG-2F15  
ctg589□ctg6041□□WAG-3G11  
ctg59□□□WAG-116H2  
ctg59□ctg203□ctg180□WAG-6C18  
ctg59□ctg203□ctg180□WAG-9M13  
ctg59□ctg203□ctg180□WAG-21F4  
ctg59□ctg203□ctg180□WAG-60O17  
ctg59□ctg203□ctg180□WAG-62H20

ctg59□ctg203□ctg180□WAG-64O7  
ctg59□ctg203□ctg180□WAG-112G7  
ctg59□ctg203□ctg180□WAG-115I6  
ctg59□ctg203□ctg180□WAG-127E18  
ctg590□ctg1298□□WAG-113H2  
ctg590□ctg1298□ctg1460□WAG-39D16  
ctg590□ctg1298□ctg1460□WAG-52B3  
ctg590□ctg1298□ctg1460□WAG-69G1  
ctg590□ctg1298□ctg1460□WAG-125C12  
ctg591□□□WAG-124G9  
ctg591□ctg1504□□WAG-41D17  
ctg591□ctg1504□□WAG-88N23  
ctg591□ctg1504□ctg1714□WAG-16A10  
ctg591□ctg1504□ctg1714□WAG-17C8  
ctg591□ctg1504□ctg1714□WAG-73E3  
ctg591□ctg1504□ctg1714□WAG-109A22  
ctg592□ctg1299□ctg1150□WAG-94E6  
ctg592□ctg1299□ctg1150□WAG-119P10  
ctg592□ctg1299□ctg1150□WAG-120F19  
ctg592□ctg1299□ctg1150□WAG-128I13  
ctg593□□□WAG-89J6  
ctg593□ctg1557□ctg1481□WAG-16H22  
ctg593□ctg1557□ctg1481□WAG-61D9  
ctg593□ctg1557□ctg1481□WAG-74H2  
ctg593□ctg1557□ctg1481□WAG-100G20  
ctg593□ctg1557□ctg1481□WAG-112J5  
ctg593□ctg1557□ctg1481□WAG-120L18  
ctg594□□□WAG-84C11  
ctg594□ctg1509□□WAG-61M3  
ctg594□ctg1509□ctg1790□WAG-17D7  
ctg594□ctg1509□ctg1790□WAG-30F4  
ctg594□ctg1509□ctg1790□WAG-30F6  
ctg594□ctg1509□ctg1790□WAG-69N9  
ctg594□ctg1509□ctg1790□WAG-74G1  
ctg594□ctg1509□ctg1790□WAG-121A17  
ctg594□ctg5316□ctg6194□WAG-60L24  
ctg594□ctg5316□ctg6194□WAG-80M2  
ctg595□ctg1304□ctg1156□WAG-20B17  
ctg595□ctg1304□ctg1156□WAG-22B11  
ctg595□ctg1304□ctg1156□WAG-76A23  
ctg595□ctg1304□ctg1156□WAG-89O2  
ctg595□ctg1304□ctg1156□WAG-96O20  
ctg595□ctg1304□ctg1156□WAG-130I6  
ctg596□□□WAG-94J8  
ctg596□ctg1307□□WAG-29B16  
ctg596□ctg1307□ctg1524□WAG-29M11  
ctg596□ctg1307□ctg1524□WAG-35F7  
ctg596□ctg1307□ctg1524□WAG-49G8  
ctg596□ctg1307□ctg1524□WAG-53F22  
ctg596□ctg6513□□WAG-77A3  
ctg596□ctg6513□□WAG-85D1  
ctg597□□□WAG-88A2  
ctg597□ctg1308□ctg1159□WAG-40O13  
ctg597□ctg1308□ctg1159□WAG-62M13  
ctg597□ctg1308□ctg1159□WAG-85D22  
ctg597□ctg1308□ctg1159□WAG-94I8

ctg597□ctg1308□ctg1159□WAG-115L15  
ctg597□ctg1308□ctg1159□WAG-126K20  
ctg597□ctg1308□ctg1159□WAG-127P18  
ctg597□ctg1308□ctg5248□WAG-71O19  
ctg597□ctg1308□ctg5248□WAG-99F1  
ctg598□ctg1522□ctg1922□WAG-17F24  
ctg598□ctg1522□ctg1922□WAG-18A22  
ctg598□ctg1522□ctg1922□WAG-38G17  
ctg598□ctg1522□ctg1922□WAG-66P12  
ctg598□ctg1522□ctg1922□WAG-69E12  
ctg598□ctg1522□ctg1922□WAG-103N9  
ctg598□ctg1522□ctg5009□WAG-67L8  
ctg598□ctg1522□ctg5009□WAG-70B19  
ctg598□ctg1522□ctg6496□WAG-49P7  
ctg598□ctg1522□ctg6496□WAG-89O22  
ctg599□□□WAG-45M23  
ctg599□ctg1524□ctg1739□WAG-20O11  
ctg599□ctg1524□ctg1739□WAG-51N4  
ctg599□ctg1524□ctg1739□WAG-80H6  
ctg599□ctg1524□ctg1739□WAG-108A3  
ctg599□ctg1524□ctg1739□WAG-114L23  
ctg599□ctg1524□ctg1739□WAG-126D1  
ctg599□ctg1524□ctg1739□WAG-129K9  
ctg6□ctg44□□WAG-3K9  
ctg6□ctg44□□WAG-92M15  
ctg6□ctg44□ctg33□WAG-5B17  
ctg6□ctg44□ctg33□WAG-9O13  
ctg6□ctg44□ctg33□WAG-25C7  
ctg6□ctg44□ctg33□WAG-26A10  
ctg6□ctg44□ctg33□WAG-31M4  
ctg6□ctg44□ctg33□WAG-44J7  
ctg6□ctg44□ctg33□WAG-51O14  
ctg6□ctg44□ctg33□WAG-59O18  
ctg6□ctg44□ctg33□WAG-67N19  
ctg6□ctg44□ctg33□WAG-94O14  
ctg6□ctg44□ctg33□WAG-96K11  
ctg6□ctg44□ctg33□WAG-100A14  
ctg6□ctg44□ctg33□WAG-112J1  
ctg6□ctg44□ctg33□WAG-123C12  
ctg6□ctg44□ctg33□WAG-127K19  
ctg6□ctg44□ctg33□WAG-128A14  
ctg6□ctg44□ctg3669□WAG-46J24  
ctg6□ctg44□ctg3669□WAG-64N9  
ctg6□ctg44□ctg3669□WAG-104L11  
ctg60□□□WAG-34E19  
ctg60□ctg1583□□WAG-8B2  
ctg60□ctg1583□□WAG-49A1  
ctg60□ctg1583□ctg2581□WAG-1O10  
ctg60□ctg1583□ctg2581□WAG-61F10  
ctg60□ctg1583□ctg2581□WAG-65I24  
ctg60□ctg1583□ctg2581□WAG-112D21  
ctg60□ctg1583□ctg2581□WAG-117J1  
ctg60□ctg365□□WAG-36K22  
ctg60□ctg365□□WAG-47K23  
ctg60□ctg365□□WAG-62O10  
ctg60□ctg365□□WAG-100O8

ctg60□ctg365□□WAG-111J13  
ctg60□ctg365□ctg495□WAG-28B10  
ctg60□ctg365□ctg495□WAG-28C11  
ctg60□ctg365□ctg495□WAG-64D13  
ctg60□ctg365□ctg495□WAG-84D12  
ctg60□ctg365□ctg495□WAG-97O5  
ctg60□ctg365□ctg495□WAG-99G20  
ctg60□ctg365□ctg495□WAG-122K1  
ctg600□ctg1582□ctg1429□WAG-42B22  
ctg600□ctg1582□ctg1429□WAG-47H23  
ctg600□ctg1582□ctg1429□WAG-70N17  
ctg600□ctg1582□ctg1429□WAG-94H20  
ctg600□ctg3201□□WAG-97N3  
ctg600□ctg3201□□WAG-103I16  
ctg600□ctg3201□ctg5754□WAG-75F7  
ctg600□ctg3201□ctg5754□WAG-89B14  
ctg601□□□WAG-15J16  
ctg601□□□WAG-94P14  
ctg601□□□WAG-122M9  
ctg601□ctg2172□□WAG-8H11  
ctg601□ctg2172□□WAG-54I16  
ctg601□ctg2172□□WAG-82F15  
ctg601□ctg2172□ctg3105□WAG-1L2  
ctg601□ctg2172□ctg3105□WAG-84D14  
ctg601□ctg2172□ctg3105□WAG-94B7  
ctg601□ctg2172□ctg4579□WAG-25B15  
ctg601□ctg2172□ctg4579□WAG-99K15  
ctg601□ctg2950□□WAG-35A1  
ctg601□ctg2950□□WAG-93J4  
ctg601□ctg2950□ctg3836□WAG-123B17  
ctg601□ctg2950□ctg3836□WAG-126L21  
ctg601□ctg2950□ctg3836□WAG-129A12  
ctg602□ctg1328□□WAG-12L22  
ctg602□ctg1328□ctg1499□WAG-16G10  
ctg602□ctg1328□ctg1499□WAG-45L14  
ctg602□ctg1328□ctg1499□WAG-60O3  
ctg602□ctg1328□ctg1499□WAG-68D16  
ctg603□ctg1543□ctg1389□WAG-29I16  
ctg603□ctg1543□ctg1389□WAG-36C12  
ctg603□ctg1543□ctg1389□WAG-36O15  
ctg603□ctg1543□ctg1389□WAG-72G19  
ctg603□ctg1543□ctg1389□WAG-97M5  
ctg603□ctg1543□ctg1389□WAG-104F14  
ctg603□ctg1543□ctg6161□WAG-21O3  
ctg603□ctg1543□ctg6161□WAG-81L23  
ctg604□ctg2067□ctg1926□WAG-74G20  
ctg604□ctg2067□ctg1926□WAG-97E15  
ctg604□ctg2067□ctg1926□WAG-130E23  
ctg604□ctg2193□ctg2062□WAG-9B4  
ctg604□ctg2193□ctg2062□WAG-91A16  
ctg604□ctg2193□ctg2062□WAG-91L8  
ctg604□ctg2193□ctg2062□WAG-104G7  
ctg604□ctg2193□ctg2367□WAG-27L9  
ctg604□ctg2193□ctg2367□WAG-40H9  
ctg604□ctg2193□ctg2367□WAG-89A7  
ctg604□ctg2193□ctg2367□WAG-115L12

ctg605□□□WAG-104M3  
ctg605□ctg2305□□WAG-21P2  
ctg605□ctg2305□□WAG-81C23  
ctg605□ctg2305□□WAG-104C21  
ctg605□ctg2305□□WAG-113D14  
ctg605□ctg2305□ctg3360□WAG-38N22  
ctg605□ctg2305□ctg3360□WAG-69E15  
ctg605□ctg2305□ctg3360□WAG-86G13  
ctg605□ctg3311□□WAG-95L11  
ctg605□ctg3311□ctg4383□WAG-18M7  
ctg605□ctg3311□ctg4383□WAG-112G3  
ctg605□ctg5147□ctg5801□WAG-75L9  
ctg605□ctg5147□ctg5801□WAG-81H16  
ctg606□ctg1602□□WAG-87B10  
ctg606□ctg1602□□WAG-110C14  
ctg606□ctg1602□ctg1449□WAG-34N11  
ctg606□ctg1602□ctg1449□WAG-97N23  
ctg606□ctg1602□ctg1449□WAG-102F14  
ctg606□ctg1602□ctg1449□WAG-129J23  
ctg607□ctg1335□ctg1493□WAG-14A1  
ctg607□ctg1335□ctg1493□WAG-37N18  
ctg607□ctg1335□ctg1493□WAG-56C12  
ctg607□ctg1335□ctg1493□WAG-82O11  
ctg607□ctg1335□ctg1493□WAG-92C15  
ctg607□ctg1335□ctg1493□WAG-98A5  
ctg607□ctg1335□ctg1493□WAG-98M13  
ctg607□ctg1461□ctg1707□WAG-69J7  
ctg607□ctg1461□ctg1707□WAG-81D9  
ctg607□ctg1461□ctg1707□WAG-83H14  
ctg607□ctg1461□ctg1707□WAG-84N3  
ctg607□ctg1461□ctg1707□WAG-84O4  
ctg608□ctg1513□□WAG-130O21  
ctg608□ctg1513□ctg1357□WAG-59E7  
ctg608□ctg1513□ctg1357□WAG-79C13  
ctg608□ctg1513□ctg1357□WAG-80C11  
ctg608□ctg1513□ctg1357□WAG-127P15  
ctg609□□□WAG-43L11  
ctg609□ctg1346□ctg1564□WAG-1H20  
ctg609□ctg1346□ctg1564□WAG-6B7  
ctg609□ctg1346□ctg1564□WAG-17N8  
ctg609□ctg1346□ctg1564□WAG-78N10  
ctg609□ctg1346□ctg1564□WAG-100I24  
ctg609□ctg1346□ctg1564□WAG-107L23  
ctg61□□□WAG-51P12  
ctg61□ctg205□□WAG-1D10  
ctg61□ctg205□□WAG-29P16  
ctg61□ctg205□□WAG-36N5  
ctg61□ctg205□□WAG-94F15  
ctg61□ctg205□ctg266□WAG-32H15  
ctg61□ctg205□ctg266□WAG-46P3  
ctg61□ctg205□ctg266□WAG-51A5  
ctg61□ctg205□ctg266□WAG-51L14  
ctg61□ctg205□ctg266□WAG-52M17  
ctg61□ctg205□ctg266□WAG-64C2  
ctg61□ctg205□ctg266□WAG-66H13  
ctg61□ctg205□ctg266□WAG-72M15

ctg61□ctg205□ctg266□WAG-87I4  
ctg61□ctg205□ctg2888□WAG-18G11  
ctg61□ctg205□ctg2888□WAG-78P3  
ctg61□ctg205□ctg2888□WAG-88A22  
ctg610□□□WAG-3B16  
ctg610□ctg1612□ctg1465□WAG-13G14  
ctg610□ctg1612□ctg1465□WAG-86N17  
ctg610□ctg1612□ctg1465□WAG-114F22  
ctg610□ctg1612□ctg1465□WAG-117I3  
ctg611□ctg1347□□WAG-42I18  
ctg611□ctg1347□ctg1466□WAG-25F7  
ctg611□ctg1347□ctg1466□WAG-52E6  
ctg611□ctg1347□ctg1466□WAG-94M11  
ctg611□ctg1347□ctg1466□WAG-109B6  
ctg611□ctg1347□ctg1466□WAG-114I10  
ctg611□ctg1347□ctg1466□WAG-130H6  
ctg611□ctg5670□ctg6848□WAG-30O16  
ctg611□ctg5670□ctg6848□WAG-59N7  
ctg612□□□WAG-123B15  
ctg612□ctg1836□□WAG-28I18  
ctg612□ctg1836□□WAG-37M21  
ctg612□ctg1836□□WAG-102B1  
ctg612□ctg1836□ctg1668□WAG-5H1  
ctg612□ctg1836□ctg1668□WAG-5M1  
ctg612□ctg1836□ctg1668□WAG-33A9  
ctg612□ctg1836□ctg1668□WAG-55H10  
ctg612□ctg1836□ctg1668□WAG-65J13  
ctg612□ctg1836□ctg1668□WAG-86M16  
ctg613□□□WAG-106L24  
ctg613□□□WAG-108K13  
ctg613□ctg4355□□WAG-71F9  
ctg613□ctg4355□ctg6098□WAG-9A1  
ctg613□ctg4355□ctg6098□WAG-127M15  
ctg613□ctg4921□ctg5263□WAG-12A20  
ctg613□ctg4921□ctg5263□WAG-80A9  
ctg613□ctg4930□ctg5283□WAG-94H7  
ctg613□ctg4930□ctg5283□WAG-124N20  
ctg614□□□WAG-39C11  
ctg614□□□WAG-39E24  
ctg614□□□WAG-56B10  
ctg614□□□WAG-104I1  
ctg614□ctg1563□ctg2436□WAG-23K15  
ctg614□ctg1563□ctg2436□WAG-26B14  
ctg614□ctg1563□ctg2436□WAG-37F6  
ctg614□ctg1563□ctg2436□WAG-72F15  
ctg614□ctg1563□ctg2436□WAG-75P1  
ctg615□□□WAG-69N11  
ctg615□ctg1779□ctg1732□WAG-1E10  
ctg615□ctg1779□ctg1732□WAG-22M12  
ctg615□ctg1779□ctg1732□WAG-86F20  
ctg615□ctg1779□ctg1732□WAG-90H18  
ctg615□ctg1779□ctg1732□WAG-94P11  
ctg615□ctg1779□ctg1732□WAG-106N8  
ctg615□ctg1779□ctg6910□WAG-82F3  
ctg615□ctg1779□ctg6910□WAG-117G1  
ctg616□□□WAG-34E10

ctg616□□□WAG-109H24  
ctg616□ctg1626□□WAG-20B2  
ctg616□ctg1626□□WAG-43C11  
ctg616□ctg1626□□WAG-50I21  
ctg616□ctg1626□□WAG-64B22  
ctg616□ctg1626□□WAG-89B8  
ctg616□ctg1626□ctg3149□WAG-100H18  
ctg616□ctg1626□ctg3149□WAG-106K16  
ctg616□ctg1626□ctg3149□WAG-122B4  
ctg616□ctg1626□ctg3930□WAG-14F5  
ctg616□ctg1626□ctg3930□WAG-36P7  
ctg616□ctg1626□ctg3930□WAG-117B4  
ctg616□ctg1626□ctg5313□WAG-23B6  
ctg616□ctg1626□ctg5313□WAG-73G22  
ctg617□ctg2106□□WAG-12L9  
ctg617□ctg2106□□WAG-58I16  
ctg617□ctg2106□□WAG-80B7  
ctg617□ctg2106□□WAG-129L20  
ctg617□ctg2106□ctg2728□WAG-48F11  
ctg617□ctg2106□ctg2728□WAG-60F18  
ctg617□ctg2106□ctg2728□WAG-84J1  
ctg617□ctg2106□ctg3421□WAG-91G13  
ctg617□ctg2106□ctg3421□WAG-123A21  
ctg617□ctg2106□ctg3421□WAG-129E23  
ctg618□ctg2200□ctg2178□WAG-6G22  
ctg618□ctg2200□ctg2178□WAG-80I5  
ctg618□ctg2200□ctg2178□WAG-83C8  
ctg618□ctg2200□ctg2178□WAG-101A4  
ctg618□ctg2200□ctg2802□WAG-71O3  
ctg618□ctg2200□ctg2802□WAG-81J1  
ctg618□ctg2200□ctg2802□WAG-102C18  
ctg619□□□WAG-32A8  
ctg619□ctg1358□□WAG-88A17  
ctg619□ctg1358□ctg1956□WAG-80C24  
ctg619□ctg1358□ctg1956□WAG-102E12  
ctg619□ctg1358□ctg1956□WAG-117N11  
ctg619□ctg1358□ctg1956□WAG-128K22  
ctg619□ctg1358□ctg1956□WAG-129F10  
ctg62□ctg331□□WAG-118K12  
ctg62□ctg331□ctg312□WAG-12J21  
ctg62□ctg331□ctg312□WAG-19F8  
ctg62□ctg331□ctg312□WAG-33F18  
ctg62□ctg331□ctg312□WAG-47A6  
ctg62□ctg331□ctg312□WAG-47P5  
ctg62□ctg331□ctg312□WAG-63D14  
ctg62□ctg331□ctg312□WAG-68L8  
ctg62□ctg331□ctg312□WAG-93F24  
ctg62□ctg331□ctg312□WAG-97N4  
ctg62□ctg331□ctg312□WAG-105G24  
ctg62□ctg331□ctg312□WAG-126B11  
ctg62□ctg331□ctg312□WAG-126D22  
ctg620□ctg1589□□WAG-96A14  
ctg620□ctg1589□ctg1433□WAG-43O17  
ctg620□ctg1589□ctg1433□WAG-48O15  
ctg620□ctg1589□ctg1433□WAG-49E21  
ctg620□ctg1589□ctg1433□WAG-72G15

ctg621□□□WAG-116J22  
ctg621□ctg1599□ctg1912□WAG-47I24  
ctg621□ctg1599□ctg1912□WAG-79D23  
ctg621□ctg1599□ctg1912□WAG-100L15  
ctg621□ctg1599□ctg1912□WAG-110B5  
ctg621□ctg1599□ctg1912□WAG-115I9  
ctg621□ctg1599□ctg1912□WAG-125C20  
ctg622□ctg1861□ctg1693□WAG-22B19  
ctg622□ctg1861□ctg1693□WAG-22O10  
ctg622□ctg1861□ctg1693□WAG-23E18  
ctg622□ctg1861□ctg1693□WAG-30C20  
ctg622□ctg1861□ctg1693□WAG-64D21  
ctg622□ctg1861□ctg1693□WAG-86M7  
ctg622□ctg1861□ctg1693□WAG-106B2  
ctg623□□□WAG-1L7  
ctg623□□□WAG-9A5  
ctg623□□□WAG-114F13  
ctg623□□□WAG-128J5  
ctg623□ctg1792□□WAG-73B20  
ctg623□ctg1792□ctg1886□WAG-17B6  
ctg623□ctg1792□ctg1886□WAG-62A11  
ctg623□ctg1792□ctg1886□WAG-63J14  
ctg623□ctg1792□ctg1886□WAG-86I18  
ctg623□ctg1965□□WAG-88L5  
ctg623□ctg1965□ctg2351□WAG-5P12  
ctg623□ctg1965□ctg2351□WAG-32L12  
ctg623□ctg1965□ctg2351□WAG-86P7  
ctg623□ctg1965□ctg2351□WAG-110H7  
ctg623□ctg4487□□WAG-7G1  
ctg623□ctg4487□ctg5635□WAG-63L13  
ctg623□ctg4487□ctg5635□WAG-98F5  
ctg624□ctg1604□□WAG-70N2  
ctg624□ctg1604□□WAG-79D19  
ctg624□ctg1604□ctg2509□WAG-16C12  
ctg624□ctg1604□ctg2509□WAG-113B13  
ctg624□ctg1604□ctg2509□WAG-126G16  
ctg624□ctg1604□ctg3922□WAG-50K5  
ctg624□ctg1604□ctg3922□WAG-60G22  
ctg624□ctg1604□ctg3922□WAG-105G6  
ctg624□ctg4043□□WAG-96D16  
ctg624□ctg4043□□WAG-98C24  
ctg624□ctg4043□ctg5996□WAG-3N22  
ctg624□ctg4043□ctg5996□WAG-121G9  
ctg625□ctg1384□□WAG-19G9  
ctg625□ctg1384□ctg2701□WAG-24M22  
ctg625□ctg1384□ctg2701□WAG-34L6  
ctg625□ctg1384□ctg2701□WAG-37I14  
ctg625□ctg1384□ctg2701□WAG-63D12  
ctg625□ctg1384□ctg2701□WAG-68E19  
ctg625□ctg1384□ctg2701□WAG-120D15  
ctg626□□□WAG-47K11  
ctg626□ctg1388□ctg1556□WAG-7F11  
ctg626□ctg1388□ctg1556□WAG-33F16  
ctg626□ctg1388□ctg1556□WAG-96J5  
ctg626□ctg1388□ctg1556□WAG-109E18  
ctg626□ctg1388□ctg1556□WAG-119L18



ctg626□ctg2662□□WAG-28E7  
ctg626□ctg2662□ctg3505□WAG-53B15  
ctg626□ctg2662□ctg3505□WAG-119G7  
ctg626□ctg2662□ctg3505□WAG-129A24  
ctg626□ctg2662□ctg4316□WAG-114H22  
ctg626□ctg2662□ctg4316□WAG-115J16  
ctg626□ctg3156□ctg3175□WAG-6C16  
ctg626□ctg3156□ctg3175□WAG-6O16  
ctg626□ctg3156□ctg3175□WAG-51O6  
ctg626□ctg3156□ctg3175□WAG-59C17  
ctg626□ctg4242□□WAG-80F22  
ctg626□ctg4242□ctg6174□WAG-9P14  
ctg626□ctg4242□ctg6174□WAG-46M9  
ctg627□□□WAG-65J2  
ctg627□ctg1620□ctg1474□WAG-63F10  
ctg627□ctg1620□ctg1474□WAG-74P4  
ctg627□ctg1620□ctg1474□WAG-84J15  
ctg627□ctg1620□ctg1474□WAG-88A18  
ctg627□ctg1620□ctg1474□WAG-103H14  
ctg627□ctg1620□ctg1474□WAG-119D15  
ctg627□ctg1620□ctg1474□WAG-129M3  
ctg627□ctg3603□ctg3781□WAG-54F10  
ctg627□ctg3603□ctg3781□WAG-67N2  
ctg627□ctg3603□ctg3781□WAG-116G16  
ctg627□ctg6154□□WAG-6P24  
ctg627□ctg6154□□WAG-19A6  
ctg628□□□WAG-78K16  
ctg628□□□WAG-107A17  
ctg628□□□WAG-126G15  
ctg628□□□WAG-126O14  
ctg628□ctg1888□□WAG-28G18  
ctg628□ctg1888□ctg2337□WAG-27J7  
ctg628□ctg1888□ctg2337□WAG-40A14  
ctg628□ctg1888□ctg2337□WAG-55H24  
ctg628□ctg1888□ctg2337□WAG-86A10  
ctg628□ctg1888□ctg5394□WAG-85P19  
ctg628□ctg1888□ctg5394□WAG-89G13  
ctg629□ctg1394□□WAG-10N4  
ctg629□ctg1394□□WAG-73D3  
ctg629□ctg1394□□WAG-98C11  
ctg629□ctg1394□ctg1563□WAG-41N17  
ctg629□ctg1394□ctg1563□WAG-76M21  
ctg629□ctg1394□ctg1563□WAG-95C1  
ctg629□ctg1394□ctg1563□WAG-95J4  
ctg629□ctg1394□ctg1563□WAG-105E17  
ctg629□ctg3824□ctg4084□WAG-29K18  
ctg629□ctg3824□ctg4084□WAG-30J5  
ctg629□ctg3824□ctg4084□WAG-33G15  
ctg63□ctg359□□WAG-21A20  
ctg63□ctg359□□WAG-54G20  
ctg63□ctg359□ctg567□WAG-20E18  
ctg63□ctg359□ctg567□WAG-24N16  
ctg63□ctg359□ctg567□WAG-37N9  
ctg63□ctg359□ctg567□WAG-43L20  
ctg63□ctg359□ctg567□WAG-57O24  
ctg63□ctg359□ctg567□WAG-62F11

ctg63□ctg359□ctg567□WAG-64J12  
ctg63□ctg359□ctg567□WAG-71I4  
ctg63□ctg359□ctg567□WAG-84M8  
ctg63□ctg359□ctg567□WAG-104N8  
ctg63□ctg359□ctg567□WAG-109P10  
ctg63□ctg359□ctg567□WAG-112L10  
ctg63□ctg359□ctg567□WAG-121L8  
ctg63□ctg359□ctg567□WAG-121L13  
ctg630□□□WAG-50D22  
ctg630□□□WAG-79B17  
ctg630□ctg1636□□WAG-72E4  
ctg630□ctg1636□ctg1891□WAG-10J20  
ctg630□ctg1636□ctg1891□WAG-85J18  
ctg630□ctg1636□ctg1891□WAG-87J14  
ctg630□ctg1636□ctg1891□WAG-101I16  
ctg630□ctg1636□ctg1891□WAG-126E13  
ctg631□ctg1667□□WAG-58E19  
ctg631□ctg1667□□WAG-115N7  
ctg631□ctg1667□ctg1521□WAG-73D22  
ctg631□ctg1667□ctg1521□WAG-84L2  
ctg631□ctg1667□ctg1521□WAG-93H8  
ctg631□ctg1667□ctg1521□WAG-107E10  
ctg631□ctg1667□ctg1521□WAG-122O20  
ctg631□ctg1667□ctg4790□WAG-71P16  
ctg631□ctg1667□ctg4790□WAG-118B23  
ctg632□ctg2238□ctg2143□WAG-23O12  
ctg632□ctg2238□ctg2143□WAG-25N11  
ctg632□ctg2238□ctg2143□WAG-37P17  
ctg632□ctg2238□ctg2143□WAG-52E3  
ctg632□ctg2238□ctg2143□WAG-96M12  
ctg632□ctg2238□ctg2143□WAG-121H10  
ctg632□ctg6158□□WAG-7M13  
ctg632□ctg6158□□WAG-24N6  
ctg633□ctg2423□□WAG-6C12  
ctg633□ctg2423□□WAG-94N20  
ctg633□ctg2423□□WAG-99A18  
ctg633□ctg2423□ctg3017□WAG-53H17  
ctg633□ctg2423□ctg3017□WAG-84F23  
ctg633□ctg2423□ctg3017□WAG-108E20  
ctg633□ctg2423□ctg3017□WAG-111H20  
ctg633□ctg2423□ctg3017□WAG-118E16  
ctg633□ctg2423□ctg3017□WAG-123J19  
ctg633□ctg2455□ctg4325□WAG-23B3  
ctg633□ctg2455□ctg4325□WAG-56D15  
ctg633□ctg2455□ctg5552□WAG-66D16  
ctg633□ctg2455□ctg5552□WAG-77L10  
ctg634□□□WAG-10O17  
ctg634□□□WAG-20O22  
ctg634□□□WAG-62N11  
ctg634□ctg1673□ctg1525□WAG-41M17  
ctg634□ctg1673□ctg1525□WAG-64L2  
ctg634□ctg1673□ctg1525□WAG-104A19  
ctg634□ctg1673□ctg1525□WAG-104L18  
ctg634□ctg1673□ctg1525□WAG-126B10  
ctg635□ctg1668□□WAG-68A7  
ctg635□ctg1668□ctg1864□WAG-18C11

ctg635□ctg1668□ctg1864□WAG-34G4  
ctg635□ctg1668□ctg1864□WAG-40H14  
ctg635□ctg1668□ctg1864□WAG-59M17  
ctg635□ctg1668□ctg1864□WAG-61I7  
ctg635□ctg2212□ctg3480□WAG-12A5  
ctg635□ctg2212□ctg3480□WAG-67G14  
ctg635□ctg2212□ctg3480□WAG-69C19  
ctg635□ctg2212□ctg3480□WAG-88A16  
ctg635□ctg2212□ctg3480□WAG-117L5  
ctg635□ctg2212□ctg3480□WAG-121M12  
ctg636□ctg2021□□WAG-120P7  
ctg636□ctg2021□ctg1867□WAG-23K20  
ctg636□ctg2021□ctg1867□WAG-78G13  
ctg636□ctg2021□ctg1867□WAG-87G18  
ctg636□ctg4458□ctg4605□WAG-90J11  
ctg636□ctg4458□ctg4605□WAG-103J23  
ctg637□ctg1631□□WAG-14K21  
ctg637□ctg1631□□WAG-43C8  
ctg637□ctg1631□□WAG-104M13  
ctg637□ctg1631□□WAG-109A5  
ctg637□ctg1631□□WAG-120N13  
ctg637□ctg1631□ctg2576□WAG-10I13  
ctg637□ctg1631□ctg2576□WAG-100N10  
ctg637□ctg1631□ctg2576□WAG-104M8  
ctg637□ctg1631□ctg2576□WAG-117G18  
ctg637□ctg1631□ctg2576□WAG-127C2  
ctg638□□□WAG-32L15  
ctg638□ctg2346□ctg2254□WAG-25H22  
ctg638□ctg2346□ctg2254□WAG-48C16  
ctg638□ctg2346□ctg2254□WAG-109O24  
ctg638□ctg3620□□WAG-61H21  
ctg638□ctg3620□□WAG-96P6  
ctg638□ctg3620□ctg4897□WAG-11H24  
ctg638□ctg3620□ctg4897□WAG-91G19  
ctg639□ctg1680□ctg1534□WAG-58O14  
ctg639□ctg1680□ctg1534□WAG-72P11  
ctg639□ctg1680□ctg1534□WAG-103C15  
ctg639□ctg3971□□WAG-46J19  
ctg639□ctg3971□ctg5458□WAG-1N2  
ctg639□ctg3971□ctg5458□WAG-60E9  
ctg64□ctg343□□WAG-56H2  
ctg64□ctg343□ctg2698□WAG-35G16  
ctg64□ctg343□ctg2698□WAG-40N20  
ctg64□ctg343□ctg2698□WAG-81I18  
ctg64□ctg343□ctg2698□WAG-84J24  
ctg64□ctg343□ctg2698□WAG-105K19  
ctg64□ctg343□ctg331□WAG-10F21  
ctg64□ctg343□ctg331□WAG-32N4  
ctg64□ctg343□ctg331□WAG-57H17  
ctg64□ctg343□ctg331□WAG-57K21  
ctg64□ctg343□ctg331□WAG-74M24  
ctg64□ctg343□ctg331□WAG-76J7  
ctg64□ctg343□ctg331□WAG-78E13  
ctg64□ctg343□ctg331□WAG-91I21  
ctg64□ctg343□ctg331□WAG-98P6  
ctg64□ctg343□ctg331□WAG-103J10

ctg64□ctg343□ctg331□WAG-124L7  
ctg64□ctg343□ctg5131□WAG-66H22  
ctg64□ctg343□ctg5131□WAG-103C12  
ctg640□□□WAG-3E13  
ctg640□□□WAG-17P10  
ctg640□□□WAG-54H4  
ctg640□ctg1634□□WAG-20O10  
ctg640□ctg1634□□WAG-72O4  
ctg640□ctg1634□ctg1968□WAG-31P18  
ctg640□ctg1634□ctg1968□WAG-32A14  
ctg640□ctg1634□ctg1968□WAG-79F17  
ctg640□ctg1634□ctg1968□WAG-86L13  
ctg640□ctg1634□ctg1968□WAG-97A9  
ctg640□ctg4097□□WAG-115D16  
ctg640□ctg4097□ctg6210□WAG-89F18  
ctg640□ctg4097□ctg6210□WAG-118B1  
ctg641□□□WAG-54I11  
ctg641□□□WAG-65M14  
ctg641□□□WAG-129F2  
ctg641□ctg1681□□WAG-17I8  
ctg641□ctg1681□□WAG-112O13  
ctg641□ctg1681□ctg3224□WAG-9H12  
ctg641□ctg1681□ctg3224□WAG-77C20  
ctg641□ctg1681□ctg3224□WAG-90K18  
ctg641□ctg1681□ctg3224□WAG-99I9  
ctg641□ctg1681□ctg5489□WAG-6A7  
ctg641□ctg1681□ctg5489□WAG-123C21  
ctg642□ctg1703□□WAG-99A17  
ctg642□ctg1703□□WAG-103G8  
ctg642□ctg1703□□WAG-111J22  
ctg642□ctg1703□□WAG-112N16  
ctg642□ctg1703□ctg1986□WAG-12K1  
ctg642□ctg1703□ctg1986□WAG-57P9  
ctg642□ctg1703□ctg1986□WAG-94H4  
ctg642□ctg1703□ctg1986□WAG-95H15  
ctg642□ctg1703□ctg1986□WAG-125H4  
ctg642□ctg1703□ctg1986□WAG-125L1  
ctg642□ctg2019□□WAG-D7  
ctg642□ctg2019□□WAG-78E10  
ctg642□ctg2019□ctg1858□WAG-16P21  
ctg642□ctg2019□ctg1858□WAG-41F3  
ctg642□ctg2019□ctg1858□WAG-63C15  
ctg642□ctg2019□ctg1858□WAG-99P22  
ctg643□ctg1406□□WAG-53K14  
ctg643□ctg1406□□WAG-107F10  
ctg643□ctg1406□□WAG-116C16  
ctg643□ctg1406□ctg2516□WAG-10G8  
ctg643□ctg1406□ctg2516□WAG-48N9  
ctg643□ctg1406□ctg2516□WAG-80G19  
ctg644□□□WAG-22E8  
ctg644□□□WAG-66A12  
ctg644□□□WAG-104M24  
ctg644□ctg1637□ctg1773□WAG-32D16  
ctg644□ctg1637□ctg1773□WAG-37I19  
ctg644□ctg1637□ctg1773□WAG-40E7  
ctg644□ctg1637□ctg1773□WAG-71E9

ctg644□ctg1637□ctg1773□WAG-83G12  
ctg644□ctg1637□ctg1773□WAG-110E7  
ctg644□ctg1637□ctg1773□WAG-116J13  
ctg644□ctg2922□□WAG-1H15  
ctg644□ctg2922□□WAG-2P16  
ctg644□ctg2922□ctg3804□WAG-37C9  
ctg644□ctg2922□ctg3804□WAG-49N20  
ctg644□ctg2922□ctg3804□WAG-115H8  
ctg644□ctg4714□ctg4891□WAG-61M20  
ctg644□ctg4714□ctg4891□WAG-108N3  
ctg644□ctg4989□ctg5430□WAG-63J21  
ctg644□ctg4989□ctg5430□WAG-67B19  
ctg644□ctg5704□□WAG-26D4  
ctg644□ctg5704□□WAG-31F12  
ctg645□ctg1639□□WAG-31G17  
ctg645□ctg1639□□WAG-73J11  
ctg645□ctg1639□ctg1497□WAG-51J5  
ctg645□ctg1639□ctg1497□WAG-64B9  
ctg645□ctg1639□ctg1497□WAG-67M1  
ctg645□ctg1639□ctg1497□WAG-70H2  
ctg645□ctg1639□ctg1497□WAG-99B6  
ctg645□ctg2382□ctg2277□WAG-57B12  
ctg645□ctg2382□ctg2277□WAG-58K3  
ctg645□ctg2382□ctg2277□WAG-68P14  
ctg645□ctg2382□ctg2277□WAG-77H16  
ctg645□ctg2382□ctg2277□WAG-85L1  
ctg645□ctg3613□ctg3795□WAG-84E16  
ctg645□ctg3613□ctg3795□WAG-125K17  
ctg645□ctg3613□ctg3795□WAG-125L18  
ctg646□□□WAG-128G21  
ctg646□ctg1411□ctg2142□WAG-3I1  
ctg646□ctg1411□ctg2142□WAG-14D7  
ctg646□ctg1411□ctg2142□WAG-62E22  
ctg646□ctg1411□ctg2142□WAG-77I16  
ctg646□ctg1411□ctg6479□WAG-71I17  
ctg646□ctg1411□ctg6479□WAG-102I5  
ctg647□ctg1412□□WAG-28B20  
ctg647□ctg1412□ctg1646□WAG-22N17  
ctg647□ctg1412□ctg1646□WAG-66B14  
ctg647□ctg1412□ctg1646□WAG-124I12  
ctg648□□□WAG-25P1  
ctg648□□□WAG-65M18  
ctg648□□□WAG-91I14  
ctg648□ctg1704□ctg1552□WAG-18O10  
ctg648□ctg1704□ctg1552□WAG-53P18  
ctg648□ctg1704□ctg1552□WAG-61O22  
ctg648□ctg1704□ctg1552□WAG-64E22  
ctg648□ctg1704□ctg1552□WAG-69I19  
ctg648□ctg1704□ctg1552□WAG-73N11  
ctg648□ctg1704□ctg1552□WAG-94L3  
ctg649□ctg1419□ctg1265□WAG-42J21  
ctg649□ctg1419□ctg1265□WAG-60B4  
ctg649□ctg1419□ctg1265□WAG-61P18  
ctg649□ctg1419□ctg1265□WAG-65G11  
ctg649□ctg1419□ctg1265□WAG-126N7  
ctg65□□□WAG-16J21

ctg65□□□WAG-123A8  
ctg65□ctg275□ctg213□WAG-30D7  
ctg65□ctg275□ctg213□WAG-41H4  
ctg65□ctg275□ctg213□WAG-47N6  
ctg65□ctg275□ctg213□WAG-71H9  
ctg65□ctg275□ctg213□WAG-79J22  
ctg65□ctg275□ctg213□WAG-83F6  
ctg65□ctg275□ctg213□WAG-90B16  
ctg65□ctg275□ctg213□WAG-129N7  
ctg65□ctg275□ctg4880□WAG-50N8  
ctg65□ctg275□ctg4880□WAG-80F9  
ctg65□ctg3967□□WAG-71K18  
ctg65□ctg3967□ctg5825□WAG-17A8  
ctg65□ctg3967□ctg5825□WAG-109I9  
ctg65□ctg5979□□WAG-57A1  
ctg65□ctg5979□□WAG-60M24  
ctg650□ctg1420□ctg1267□WAG-16P4  
ctg650□ctg1420□ctg1267□WAG-22B23  
ctg650□ctg1420□ctg1267□WAG-108F18  
ctg651□□□WAG-19K13  
ctg651□□□WAG-111D15  
ctg651□ctg1652□□WAG-48A1  
ctg651□ctg1652□□WAG-75G12  
ctg651□ctg1652□ctg2619□WAG-8E22  
ctg651□ctg1652□ctg2619□WAG-78K11  
ctg651□ctg1652□ctg2619□WAG-128D24  
ctg651□ctg1652□ctg5821□WAG-24K2  
ctg651□ctg1652□ctg5821□WAG-104C5  
ctg651□ctg1652□ctg6574□WAG-44O17  
ctg651□ctg1652□ctg6574□WAG-79J13  
ctg651□ctg5352□ctg6283□WAG-45K17  
ctg651□ctg5352□ctg6283□WAG-82H17  
ctg652□ctg1709□□WAG-40P12  
ctg652□ctg1709□ctg1996□WAG-57N3  
ctg652□ctg1709□ctg1996□WAG-66B11  
ctg652□ctg1709□ctg1996□WAG-71D22  
ctg652□ctg1709□ctg1996□WAG-104O8  
ctg652□ctg1709□ctg1996□WAG-110G14  
ctg653□□□WAG-68A13  
ctg653□ctg2176□□WAG-99J17  
ctg653□ctg2176□ctg2053□WAG-14H15  
ctg653□ctg2176□ctg2053□WAG-67J19  
ctg653□ctg2176□ctg2053□WAG-86B12  
ctg653□ctg2176□ctg2053□WAG-102F24  
ctg653□ctg2176□ctg4865□WAG-15A6  
ctg653□ctg2176□ctg4865□WAG-84G11  
ctg653□ctg2628□ctg2587□WAG-39J19  
ctg653□ctg2628□ctg2587□WAG-63E2  
ctg653□ctg2628□ctg2587□WAG-76E12  
ctg653□ctg2628□ctg2587□WAG-85G6  
ctg653□ctg2628□ctg2587□WAG-107H16  
ctg654□□□WAG-99J1  
ctg654□ctg1819□ctg2115□WAG-2E11  
ctg654□ctg1819□ctg2115□WAG-10L18  
ctg654□ctg1819□ctg2115□WAG-24C9  
ctg654□ctg1819□ctg2115□WAG-43I13

ctg654□ctg1819□ctg2115□WAG-74F13  
ctg654□ctg1819□ctg2115□WAG-85P21  
ctg654□ctg1819□ctg2115□WAG-88N14  
ctg654□ctg1819□ctg2115□WAG-105C17  
ctg654□ctg1819□ctg2115□WAG-106K8  
ctg654□ctg1819□ctg2115□WAG-118G17  
ctg655□ctg1660□□WAG-37P2  
ctg655□ctg1660□□WAG-95O3  
ctg655□ctg1660□ctg2727□WAG-52E14  
ctg655□ctg1660□ctg2727□WAG-86N23  
ctg655□ctg1660□ctg2727□WAG-96G13  
ctg655□ctg1660□ctg2727□WAG-97I11  
ctg655□ctg6118□□WAG-1D20  
ctg655□ctg6118□□WAG-5A3  
ctg656□ctg1430□ctg1282□WAG-5B22  
ctg656□ctg1430□ctg1282□WAG-13K20  
ctg656□ctg1430□ctg1282□WAG-47H7  
ctg656□ctg1430□ctg1282□WAG-113M16  
ctg657□□□WAG-101L16  
ctg657□ctg1722□ctg1565□WAG-11P7  
ctg657□ctg1722□ctg1565□WAG-52B19  
ctg657□ctg1722□ctg1565□WAG-54C6  
ctg657□ctg1722□ctg1565□WAG-63G3  
ctg657□ctg1722□ctg1565□WAG-89P15  
ctg657□ctg1722□ctg5018□WAG-39O22  
ctg657□ctg1722□ctg5018□WAG-124M8  
ctg657□ctg1722□ctg5982□WAG-24D12  
ctg657□ctg1722□ctg5982□WAG-36P15  
ctg658□ctg1726□□WAG-3N12  
ctg658□ctg1726□□WAG-50F14  
ctg658□ctg1726□ctg1934□WAG-9B10  
ctg658□ctg1726□ctg1934□WAG-70D7  
ctg658□ctg1726□ctg1934□WAG-99P7  
ctg658□ctg1726□ctg1934□WAG-105A7  
ctg658□ctg1726□ctg1934□WAG-106A6  
ctg658□ctg1726□ctg1934□WAG-122E20  
ctg659□ctg1442□□WAG-69P20  
ctg659□ctg1442□ctg2369□WAG-36H11  
ctg659□ctg1442□ctg2369□WAG-113C3  
ctg659□ctg1442□ctg2369□WAG-114A7  
ctg659□ctg1442□ctg2369□WAG-120P6  
ctg659□ctg1442□ctg2369□WAG-126M14  
ctg66□□□WAG-128J3  
ctg66□ctg279□ctg270□WAG-9O14  
ctg66□ctg279□ctg270□WAG-33O24  
ctg66□ctg279□ctg270□WAG-54A6  
ctg66□ctg279□ctg270□WAG-58I21  
ctg66□ctg279□ctg270□WAG-58N8  
ctg66□ctg279□ctg270□WAG-59L8  
ctg66□ctg279□ctg270□WAG-66F24  
ctg66□ctg279□ctg270□WAG-85M6  
ctg66□ctg279□ctg270□WAG-93P22  
ctg66□ctg279□ctg270□WAG-123L14  
ctg66□ctg279□ctg270□WAG-130F18  
ctg660□ctg1443□ctg1291□WAG-21J3  
ctg660□ctg1443□ctg1291□WAG-77F18

ctg660□ctg1443□ctg1291□WAG-86N5  
ctg660□ctg1443□ctg1291□WAG-89J11  
ctg661□□□WAG-36H8  
ctg661□□□WAG-85H9  
ctg661□ctg1736□□WAG-33D10  
ctg661□ctg1736□□WAG-70J15  
ctg661□ctg1736□ctg1702□WAG-5I8  
ctg661□ctg1736□ctg1702□WAG-9M23  
ctg661□ctg1736□ctg1702□WAG-53L10  
ctg661□ctg1736□ctg1702□WAG-61C10  
ctg661□ctg1736□ctg1702□WAG-98N14  
ctg661□ctg1736□ctg1702□WAG-122L15  
ctg662□□□WAG-45P4  
ctg662□ctg1444□□WAG-98O8  
ctg662□ctg1444□□WAG-119F1  
ctg662□ctg1444□ctg1296□WAG-19E19  
ctg662□ctg1444□ctg1296□WAG-49O9  
ctg662□ctg1444□ctg1296□WAG-106H22  
ctg662□ctg1444□ctg1296□WAG-111N16  
ctg662□ctg3662□□WAG-86E15  
ctg662□ctg3662□□WAG-88E1  
ctg662□ctg3662□ctg4991□WAG-74G5  
ctg662□ctg3662□ctg4991□WAG-117L19  
ctg663□□□WAG-30G20  
ctg663□ctg1445□ctg1297□WAG-4G9  
ctg663□ctg1445□ctg1297□WAG-81A2  
ctg663□ctg1445□ctg1297□WAG-83O6  
ctg663□ctg1445□ctg1297□WAG-112G10  
ctg663□ctg1445□ctg1297□WAG-122C16  
ctg663□ctg1445□ctg1297□WAG-123F10  
ctg664□ctg1682□□WAG-21P6  
ctg664□ctg1682□□WAG-81P5  
ctg664□ctg1682□□WAG-118B10  
ctg664□ctg1682□ctg1961□WAG-34B9  
ctg664□ctg1682□ctg1961□WAG-35G2  
ctg664□ctg1682□ctg1961□WAG-119M10  
ctg665□□□WAG-49J2  
ctg665□□□WAG-58N2  
ctg665□□□WAG-123H9  
ctg665□ctg1974□□WAG-51N9  
ctg665□ctg1974□ctg2022□WAG-11C2  
ctg665□ctg1974□ctg2022□WAG-104K12  
ctg665□ctg1974□ctg2022□WAG-114J22  
ctg665□ctg1974□ctg4012□WAG-56G3  
ctg665□ctg1974□ctg4012□WAG-83K6  
ctg665□ctg2032□ctg2418□WAG-8K18  
ctg665□ctg2032□ctg2418□WAG-54G19  
ctg665□ctg2032□ctg2418□WAG-91N1  
ctg665□ctg2032□ctg2418□WAG-102I17  
ctg665□ctg2032□ctg2418□WAG-116I1  
ctg665□ctg2032□ctg2418□WAG-130C21  
ctg665□ctg2292□□WAG-8N1  
ctg665□ctg2292□□WAG-14L6  
ctg665□ctg2292□□WAG-28K21  
ctg665□ctg2292□□WAG-103M6  
ctg665□ctg2292□ctg6590□WAG-19N1



ctg665□ctg2292□ctg6590□WAG-126O4  
ctg665□ctg2292□ctg6859□WAG-103I4  
ctg665□ctg2292□ctg6859□WAG-110O5  
ctg665□ctg2506□□WAG-10L14  
ctg665□ctg2506□□WAG-64H1  
ctg665□ctg2506□ctg3441□WAG-15E8  
ctg665□ctg2506□ctg3441□WAG-36O4  
ctg665□ctg2506□ctg3441□WAG-70E11  
ctg665□ctg2506□ctg3441□WAG-98P4  
ctg665□ctg6569□□WAG-47O8  
ctg665□ctg6569□□WAG-124P13  
ctg666□□□WAG-15O2  
ctg666□ctg2367□□WAG-15P15  
ctg666□ctg2367□□WAG-33D5  
ctg666□ctg2367□ctg3073□WAG-53J14  
ctg666□ctg2367□ctg3073□WAG-62H15  
ctg666□ctg2367□ctg3073□WAG-111M9  
ctg666□ctg2367□ctg3073□WAG-129C24  
ctg666□ctg2367□ctg3107□WAG-52L16  
ctg666□ctg2367□ctg3107□WAG-113O7  
ctg666□ctg2367□ctg3107□WAG-122M8  
ctg667□□□WAG-3M24  
ctg667□□□WAG-54M8  
ctg667□□□WAG-59P4  
ctg667□□□WAG-102K3  
ctg667□□□WAG-115D4  
ctg667□□□WAG-119L15  
ctg667□ctg2097□ctg1960□WAG-45P10  
ctg667□ctg2097□ctg1960□WAG-84N18  
ctg667□ctg2097□ctg1960□WAG-124P14  
ctg667□ctg2249□ctg2923□WAG-36E9  
ctg667□ctg2249□ctg2923□WAG-46G23  
ctg667□ctg2249□ctg2923□WAG-80J17  
ctg667□ctg2249□ctg2923□WAG-94J13  
ctg667□ctg2249□ctg2923□WAG-98B17  
ctg667□ctg2249□ctg2923□WAG-98O1  
ctg667□ctg3391□ctg3481□WAG-59P17  
ctg667□ctg3391□ctg3481□WAG-76H15  
ctg667□ctg3391□ctg3481□WAG-78E14  
ctg668□□□WAG-27K23  
ctg668□ctg1451□ctg1302□WAG-24N3  
ctg668□ctg1451□ctg1302□WAG-33C19  
ctg668□ctg1451□ctg1302□WAG-59K6  
ctg668□ctg1451□ctg1302□WAG-76A11  
ctg668□ctg1451□ctg1302□WAG-124N10  
ctg669□□□WAG-48D9  
ctg669□□□WAG-69M17  
ctg669□ctg2040□ctg2589□WAG-24I7  
ctg669□ctg2040□ctg2589□WAG-53L8  
ctg669□ctg2040□ctg2589□WAG-64L21  
ctg669□ctg2040□ctg2589□WAG-81N15  
ctg669□ctg2040□ctg2589□WAG-111I8  
ctg67□□□WAG-38B24  
ctg67□ctg418□ctg419□WAG-8P19  
ctg67□ctg418□ctg419□WAG-22N23  
ctg67□ctg418□ctg419□WAG-52G16

ctg67□ctg418□ctg419□WAG-56J14  
ctg67□ctg418□ctg419□WAG-62C23  
ctg67□ctg418□ctg419□WAG-71A2  
ctg67□ctg418□ctg419□WAG-71J7  
ctg67□ctg418□ctg419□WAG-72K16  
ctg67□ctg418□ctg419□WAG-78N11  
ctg67□ctg418□ctg419□WAG-87L19  
ctg67□ctg418□ctg419□WAG-97A12  
ctg67□ctg418□ctg419□WAG-98M23  
ctg670□ctg1457□ctg2105□WAG-38O9  
ctg670□ctg1457□ctg2105□WAG-79M1  
ctg670□ctg1457□ctg2105□WAG-82D22  
ctg670□ctg1457□ctg2105□WAG-100N20  
ctg670□ctg1457□ctg2105□WAG-108A24  
ctg670□ctg1457□ctg2105□WAG-110F14  
ctg670□ctg6216□□WAG-23P16  
ctg670□ctg6216□□WAG-34N7  
ctg671□ctg1989□□WAG-36O18  
ctg671□ctg1989□□WAG-75L20  
ctg671□ctg1989□ctg4006□WAG-39J11  
ctg671□ctg1989□ctg4006□WAG-55B22  
ctg671□ctg1989□ctg4006□WAG-72P8  
ctg671□ctg1989□ctg4207□WAG-49D3  
ctg671□ctg1989□ctg4207□WAG-65O12  
ctg671□ctg1989□ctg5845□WAG-112H4  
ctg671□ctg1989□ctg5845□WAG-130L15  
ctg671□ctg3494□□WAG-113H12  
ctg671□ctg3494□ctg4752□WAG-58J18  
ctg671□ctg3494□ctg4752□WAG-77P1  
ctg672□□□WAG-43E24  
ctg672□□□WAG-110I13  
ctg672□ctg1463□□WAG-102H23  
ctg672□ctg1463□ctg1313□WAG-19P12  
ctg672□ctg1463□ctg1313□WAG-24B2  
ctg672□ctg1463□ctg1313□WAG-29O2  
ctg672□ctg1463□ctg1313□WAG-72D7  
ctg672□ctg1463□ctg1313□WAG-130B10  
ctg673□ctg1659□ctg1829□WAG-30O12  
ctg673□ctg1659□ctg1829□WAG-49N15  
ctg673□ctg1659□ctg1829□WAG-108H20  
ctg673□ctg1659□ctg1829□WAG-111O15  
ctg673□ctg1659□ctg1829□WAG-113J14  
ctg673□ctg1659□ctg1829□WAG-116H22  
ctg673□ctg1659□ctg1829□WAG-127N20  
ctg674□□□WAG-31K23  
ctg674□ctg1710□□WAG-45C3  
ctg674□ctg1710□□WAG-95J2  
ctg674□ctg1710□□WAG-103F17  
ctg674□ctg1710□ctg1980□WAG-45L18  
ctg674□ctg1710□ctg1980□WAG-69K11  
ctg674□ctg1710□ctg1980□WAG-74H12  
ctg674□ctg1710□ctg1980□WAG-107O4  
ctg674□ctg1710□ctg1980□WAG-116F19  
ctg674□ctg1710□ctg1980□WAG-122O14  
ctg675□□□WAG-11G9  
ctg675□□□WAG-94D17

ctg675□ctg1958□□WAG-127E7  
ctg675□ctg1958□ctg2336□WAG-28O1  
ctg675□ctg1958□ctg2336□WAG-54H7  
ctg675□ctg1958□ctg2336□WAG-61N4  
ctg675□ctg1958□ctg2336□WAG-86E14  
ctg675□ctg1958□ctg5694□WAG-73A23  
ctg675□ctg1958□ctg5694□WAG-113K14  
ctg675□ctg1958□ctg6057□WAG-71N16  
ctg675□ctg1958□ctg6057□WAG-75F14  
ctg676□ctg1484□□WAG-72O24  
ctg676□ctg1484□ctg1555□WAG-23H8  
ctg676□ctg1484□ctg1555□WAG-45B23  
ctg676□ctg1484□ctg1555□WAG-65N24  
ctg676□ctg1484□ctg1555□WAG-69J3  
ctg676□ctg1484□ctg1555□WAG-83J19  
ctg676□ctg1484□ctg1555□WAG-90G2  
ctg676□ctg1484□ctg1555□WAG-99K21  
ctg676□ctg1484□ctg1555□WAG-113G2  
ctg677□□□WAG-105M7  
ctg677□□□WAG-106F1  
ctg677□ctg1766□□WAG-130A16  
ctg677□ctg1766□ctg2069□WAG-13L13  
ctg677□ctg1766□ctg2069□WAG-101K1  
ctg677□ctg1766□ctg2069□WAG-103F23  
ctg677□ctg1766□ctg2069□WAG-129L4  
ctg677□ctg3932□□WAG-36N3  
ctg677□ctg3932□ctg5670□WAG-18A2  
ctg677□ctg3932□ctg5670□WAG-125C13  
ctg677□ctg5225□ctg5981□WAG-25C18  
ctg677□ctg5225□ctg5981□WAG-126G22  
ctg678□□□WAG-74F24  
ctg678□ctg1770□□WAG-127M21  
ctg678□ctg1770□ctg1607□WAG-12P16  
ctg678□ctg1770□ctg1607□WAG-46H2  
ctg678□ctg1770□ctg1607□WAG-58I15  
ctg678□ctg1770□ctg1607□WAG-62M11  
ctg679□□□WAG-74O9  
ctg679□ctg1715□□WAG-29B6  
ctg679□ctg1715□□WAG-99M9  
ctg679□ctg1715□□WAG-116F21  
ctg679□ctg1715□ctg2615□WAG-25F16  
ctg679□ctg1715□ctg2615□WAG-35L21  
ctg679□ctg1715□ctg2615□WAG-70D15  
ctg679□ctg3717□□WAG-105K2  
ctg679□ctg3717□□WAG-119K15  
ctg679□ctg3717□ctg3932□WAG-62G15  
ctg679□ctg3717□ctg3932□WAG-79A9  
ctg679□ctg3717□ctg3932□WAG-79H13  
ctg68□ctg264□□WAG-53B6  
ctg68□ctg264□ctg401□WAG-4D15  
ctg68□ctg264□ctg401□WAG-5K10  
ctg68□ctg264□ctg401□WAG-23E2  
ctg68□ctg264□ctg401□WAG-25C10  
ctg68□ctg264□ctg401□WAG-32A6  
ctg68□ctg264□ctg401□WAG-59E8  
ctg68□ctg264□ctg401□WAG-61H7

ctg68□ctg264□ctg401□WAG-67F5  
ctg68□ctg264□ctg401□WAG-76B4  
ctg68□ctg264□ctg401□WAG-90F2  
ctg68□ctg264□ctg401□WAG-96N1  
ctg68□ctg264□ctg401□WAG-106K21  
ctg68□ctg264□ctg401□WAG-125E3  
ctg68□ctg264□ctg401□WAG-125L4  
ctg68□ctg264□ctg401□WAG-126A1  
ctg680□□□WAG-24I1  
ctg680□□□WAG-46F2  
ctg680□□□WAG-62P3  
ctg680□□□WAG-72K13  
ctg680□□□WAG-77H12  
ctg680□ctg2722□ctg2707□WAG-13B24  
ctg680□ctg2722□ctg2707□WAG-13P15  
ctg680□ctg2722□ctg2707□WAG-61E8  
ctg680□ctg2722□ctg2707□WAG-108K23  
ctg680□ctg2722□ctg4918□WAG-19F16  
ctg680□ctg2722□ctg4918□WAG-86D24  
ctg680□ctg2722□ctg4918□WAG-113D10  
ctg680□ctg2722□ctg6419□WAG-15D24  
ctg680□ctg2722□ctg6419□WAG-42L7  
ctg680□ctg4467□ctg6498□WAG-12K6  
ctg680□ctg4467□ctg6498□WAG-49L11  
ctg680□ctg4467□ctg6780□WAG-91B7  
ctg680□ctg4467□ctg6780□WAG-122I14  
ctg681□□□WAG-90G17  
ctg681□ctg1718□□WAG-120C8  
ctg681□ctg1718□ctg3646□WAG-7D18  
ctg681□ctg1718□ctg3646□WAG-24L20  
ctg681□ctg1718□ctg3646□WAG-90P13  
ctg681□ctg1718□ctg3646□WAG-108F5  
ctg681□ctg1718□ctg3646□WAG-112D17  
ctg681□ctg1718□ctg3646□WAG-119O19  
ctg681□ctg1718□ctg6034□WAG-3K14  
ctg681□ctg1718□ctg6034□WAG-40C1  
ctg681□ctg1718□ctg6563□WAG-58O21  
ctg681□ctg1718□ctg6563□WAG-88H6  
ctg681□ctg1970□ctg2359□WAG-23G2  
ctg681□ctg1970□ctg2359□WAG-45E21  
ctg681□ctg1970□ctg2359□WAG-57L20  
ctg681□ctg1970□ctg2359□WAG-89N18  
ctg681□ctg3270□□WAG-29M1  
ctg681□ctg3270□□WAG-115G17  
ctg681□ctg3270□ctg6100□WAG-122I2  
ctg681□ctg3270□ctg6100□WAG-128O19  
ctg681□ctg3872□ctg4142□WAG-33J8  
ctg681□ctg3872□ctg4142□WAG-116C12  
ctg682□ctg1721□□WAG-45G17  
ctg682□ctg1721□ctg2018□WAG-5D7  
ctg682□ctg1721□ctg2018□WAG-16O16  
ctg682□ctg1721□ctg2018□WAG-70D19  
ctg682□ctg1721□ctg2018□WAG-72G2  
ctg682□ctg1721□ctg2018□WAG-128L10  
ctg682□ctg6367□□WAG-54J24  
ctg682□ctg6367□□WAG-125C14

ctg682□ctg6532□□WAG-91C1  
ctg682□ctg6532□□WAG-104O17  
ctg683□□□WAG-7F9  
ctg683□□□WAG-97B22  
ctg683□ctg1469□□WAG-104C17  
ctg683□ctg1469□ctg1321□WAG-21B20  
ctg683□ctg1469□ctg1321□WAG-35N15  
ctg683□ctg1469□ctg1321□WAG-85I13  
ctg683□ctg1469□ctg1321□WAG-95K14  
ctg683□ctg1469□ctg1321□WAG-104K18  
ctg683□ctg1469□ctg1321□WAG-129M18  
ctg683□ctg3441□□WAG-54E5  
ctg683□ctg3441□ctg4517□WAG-48N7  
ctg683□ctg3441□ctg4517□WAG-121O23  
ctg683□ctg5145□ctg5796□WAG-79O17  
ctg683□ctg5145□ctg5796□WAG-107I12  
ctg684□ctg1470□□WAG-32K15  
ctg684□ctg1470□□WAG-130C9  
ctg684□ctg1470□ctg1731□WAG-52H20  
ctg684□ctg1470□ctg1731□WAG-60D1  
ctg684□ctg1470□ctg1731□WAG-74B22  
ctg684□ctg1470□ctg1731□WAG-82H10  
ctg684□ctg1470□ctg1731□WAG-99C9  
ctg684□ctg2362□ctg2262□WAG-8L16  
ctg684□ctg2362□ctg2262□WAG-8M19  
ctg684□ctg2362□ctg2262□WAG-45J12  
ctg685□□□WAG-29G6  
ctg685□□□WAG-81H18  
ctg685□□□WAG-87A17  
ctg685□ctg1954□ctg1929□WAG-29D5  
ctg685□ctg1954□ctg1929□WAG-38J14  
ctg685□ctg1954□ctg1929□WAG-62B22  
ctg685□ctg1954□ctg1929□WAG-79I7  
ctg685□ctg5545□ctg6679□WAG-63C9  
ctg685□ctg5545□ctg6679□WAG-109A19  
ctg686□□□WAG-121O22  
ctg686□ctg1781□ctg1615□WAG-44M13  
ctg686□ctg1781□ctg1615□WAG-83D11  
ctg686□ctg1781□ctg1615□WAG-97D9  
ctg686□ctg1781□ctg4280□WAG-66E3  
ctg686□ctg1781□ctg4280□WAG-127I1  
ctg686□ctg4626□ctg4791□WAG-69K16  
ctg686□ctg4626□ctg4791□WAG-129D9  
ctg687□□□WAG-19K17  
ctg687□□□WAG-35K12  
ctg687□□□WAG-63P11  
ctg687□□□WAG-83O16  
ctg687□ctg1837□ctg2239□WAG-25F3  
ctg687□ctg1837□ctg2239□WAG-29J9  
ctg687□ctg1837□ctg2239□WAG-54O7  
ctg687□ctg1837□ctg2239□WAG-64M13  
ctg687□ctg1837□ctg2239□WAG-84F11  
ctg687□ctg2390□□WAG-19G23  
ctg687□ctg2390□ctg2291□WAG-22D7  
ctg687□ctg2390□ctg2291□WAG-35I12  
ctg687□ctg2390□ctg2291□WAG-40K21

ctg687□ctg2390□ctg2291□WAG-42C12  
ctg687□ctg2390□ctg2291□WAG-67A21  
ctg688□□□WAG-35K10  
ctg688□□□WAG-37B21  
ctg688□□□WAG-113F1  
ctg688□□□WAG-124H17  
ctg688□ctg2635□□WAG-3C9  
ctg688□ctg2635□□WAG-42C24  
ctg688□ctg2635□□WAG-68F7  
ctg688□ctg2635□□WAG-69G5  
ctg688□ctg2635□□WAG-73C10  
ctg688□ctg2635□ctg3104□WAG-103H16  
ctg688□ctg2635□ctg3104□WAG-104C13  
ctg688□ctg2635□ctg3104□WAG-104D13  
ctg688□ctg2635□ctg5347□WAG-53I19  
ctg688□ctg2635□ctg5347□WAG-88E5  
ctg688□ctg2679□□WAG-34G7  
ctg688□ctg2679□□WAG-122K6  
ctg688□ctg2679□ctg3361□WAG-41N15  
ctg688□ctg2679□ctg3361□WAG-78A8  
ctg688□ctg2679□ctg3361□WAG-109G15  
ctg688□ctg2679□ctg3361□WAG-124F15  
ctg688□ctg3730□□WAG-7F13  
ctg688□ctg3730□□WAG-89P8  
ctg688□ctg3730□ctg5124□WAG-4G1  
ctg688□ctg3730□ctg5124□WAG-7G10  
ctg689□□□WAG-38L4  
ctg689□□□WAG-51N3  
ctg689□ctg1727□ctg1569□WAG-37J15  
ctg689□ctg1727□ctg1569□WAG-56H16  
ctg689□ctg1727□ctg1569□WAG-64P9  
ctg689□ctg1727□ctg1569□WAG-81D2  
ctg689□ctg1727□ctg1569□WAG-89K15  
ctg689□ctg1727□ctg1569□WAG-112L1  
ctg689□ctg2908□ctg3793□WAG-71O18  
ctg689□ctg2908□ctg3793□WAG-85N5  
ctg689□ctg2908□ctg6198□WAG-69A17  
ctg689□ctg2908□ctg6198□WAG-125P1  
ctg689□ctg4074□ctg4346□WAG-68L11  
ctg689□ctg4074□ctg4346□WAG-95E16  
ctg689□ctg5496□ctg6594□WAG-65L12  
ctg689□ctg5496□ctg6594□WAG-122A16  
ctg69□ctg231□ctg387□WAG-3K7  
ctg69□ctg231□ctg387□WAG-15A21  
ctg69□ctg231□ctg387□WAG-21A4  
ctg69□ctg231□ctg387□WAG-26B22  
ctg69□ctg231□ctg387□WAG-39P1  
ctg69□ctg231□ctg387□WAG-52H3  
ctg69□ctg231□ctg387□WAG-55L6  
ctg69□ctg231□ctg387□WAG-74C20  
ctg69□ctg231□ctg387□WAG-114M21  
ctg69□ctg231□ctg387□WAG-117J19  
ctg69□ctg231□ctg387□WAG-121C21  
ctg69□ctg231□ctg387□WAG-125M3  
ctg69□ctg231□ctg387□WAG-125M23  
ctg69□ctg5383□ctg6348□WAG-12J18

ctg69□ctg5383□ctg6348□WAG-77N4  
ctg690□ctg1729□ctg2104□WAG-9J11  
ctg690□ctg1729□ctg2104□WAG-47K3  
ctg690□ctg1729□ctg2104□WAG-73O18  
ctg690□ctg1729□ctg2104□WAG-87E6  
ctg690□ctg1729□ctg2104□WAG-93N20  
ctg690□ctg1729□ctg2104□WAG-108O24  
ctg691□□□WAG-13G17  
ctg691□ctg1476□ctg1735□WAG-7O20  
ctg691□ctg1476□ctg1735□WAG-67N24  
ctg691□ctg1476□ctg1735□WAG-87M20  
ctg691□ctg1476□ctg1735□WAG-105G20  
ctg691□ctg1476□ctg1735□WAG-108G22  
ctg692□□□WAG-15P8  
ctg692□□□WAG-113H19  
ctg692□ctg1730□□WAG-105I7  
ctg692□ctg1730□□WAG-115C8  
ctg692□ctg1730□ctg2636□WAG-46H22  
ctg692□ctg1730□ctg2636□WAG-74L22  
ctg692□ctg1730□ctg2636□WAG-85G24  
ctg692□ctg1730□ctg2636□WAG-99G22  
ctg692□ctg1730□ctg2636□WAG-110G17  
ctg692□ctg1730□ctg2636□WAG-126K14  
ctg692□ctg5630□ctg6805□WAG-29K14  
ctg692□ctg5630□ctg6805□WAG-64L17  
ctg693□□□WAG-84N8  
ctg693□ctg1478□ctg1676□WAG-9E12  
ctg693□ctg1478□ctg1676□WAG-65A13  
ctg693□ctg1478□ctg1676□WAG-103E18  
ctg693□ctg1478□ctg1676□WAG-126L11  
ctg693□ctg5247□ctg6039□WAG-26C11  
ctg693□ctg5247□ctg6039□WAG-67C21  
ctg693□ctg5247□ctg6039□WAG-114C14  
ctg694□ctg3945□□WAG-73G3  
ctg694□ctg3945□ctg5748□WAG-65D12  
ctg694□ctg3945□ctg5748□WAG-89N20  
ctg694□ctg5425□ctg6444□WAG-60P14  
ctg694□ctg5425□ctg6444□WAG-122A21  
ctg694□ctg6055□□WAG-5L10  
ctg694□ctg6055□□WAG-60B6  
ctg695□□□WAG-71P14  
ctg695□□□WAG-77O3  
ctg695□ctg2034□ctg1889□WAG-46H19  
ctg695□ctg2034□ctg1889□WAG-78E6  
ctg695□ctg2034□ctg1889□WAG-84K17  
ctg695□ctg2034□ctg1889□WAG-86M6  
ctg695□ctg2034□ctg1889□WAG-96F4  
ctg695□ctg2034□ctg1889□WAG-115O9  
ctg696□ctg1745□ctg2057□WAG-26B9  
ctg696□ctg1745□ctg2057□WAG-39P24  
ctg696□ctg1745□ctg2057□WAG-53H5  
ctg696□ctg1745□ctg2057□WAG-58H20  
ctg696□ctg1745□ctg2057□WAG-120E22  
ctg697□ctg1487□ctg1752□WAG-20G23  
ctg697□ctg1487□ctg1752□WAG-74J13  
ctg697□ctg1487□ctg1752□WAG-78H1

ctg697□ctg1487□ctg1752□WAG-126A3  
ctg698□□□WAG-28G17  
ctg698□ctg1749□□WAG-30K9  
ctg698□ctg1749□□WAG-37B12  
ctg698□ctg1749□□WAG-88B15  
ctg698□ctg1749□ctg3752□WAG-5K3  
ctg698□ctg1749□ctg3752□WAG-63P1  
ctg698□ctg1749□ctg3752□WAG-126E24  
ctg698□ctg1749□ctg5600□WAG-18O20  
ctg698□ctg1749□ctg5600□WAG-35J5  
ctg698□ctg4594□□WAG-4A8  
ctg698□ctg4594□□WAG-5N15  
ctg698□ctg4594□□WAG-22A4  
ctg699□□□WAG-52E10  
ctg699□ctg1751□ctg1592□WAG-7H15  
ctg699□ctg1751□ctg1592□WAG-32P1  
ctg699□ctg1751□ctg1592□WAG-39J10  
ctg699□ctg1751□ctg1592□WAG-41H22  
ctg699□ctg1751□ctg1592□WAG-63N16  
ctg7□ctg160□□WAG-18P3  
ctg7□ctg160□□WAG-45G6  
ctg7□ctg160□□WAG-104P8  
ctg7□ctg160□ctg446□WAG-57C13  
ctg7□ctg160□ctg446□WAG-60C21  
ctg7□ctg160□ctg446□WAG-61K14  
ctg7□ctg160□ctg446□WAG-76P13  
ctg7□ctg160□ctg446□WAG-79B5  
ctg7□ctg160□ctg446□WAG-91J19  
ctg7□ctg160□ctg446□WAG-107J2  
ctg7□ctg160□ctg446□WAG-122H19  
ctg7□ctg160□ctg446□WAG-130C16  
ctg7□ctg160□ctg480□WAG-2I4  
ctg7□ctg160□ctg480□WAG-14M12  
ctg7□ctg160□ctg480□WAG-15H11  
ctg7□ctg160□ctg480□WAG-21O14  
ctg7□ctg160□ctg480□WAG-40L13  
ctg7□ctg160□ctg480□WAG-57F13  
ctg7□ctg160□ctg480□WAG-64N2  
ctg7□ctg160□ctg480□WAG-68I12  
ctg7□ctg160□ctg480□WAG-101G10  
ctg7□ctg160□ctg480□WAG-108N22  
ctg7□ctg160□ctg480□WAG-115F15  
ctg7□ctg42□□WAG-12C2  
ctg7□ctg42□□WAG-56D5  
ctg7□ctg42□ctg35□WAG-7A17  
ctg7□ctg42□ctg35□WAG-10B8  
ctg7□ctg42□ctg35□WAG-12C21  
ctg7□ctg42□ctg35□WAG-25E19  
ctg7□ctg42□ctg35□WAG-37O11  
ctg7□ctg42□ctg35□WAG-38A9  
ctg7□ctg42□ctg35□WAG-43L16  
ctg7□ctg42□ctg35□WAG-57I2  
ctg7□ctg42□ctg35□WAG-64C15  
ctg7□ctg42□ctg35□WAG-69M3  
ctg7□ctg42□ctg35□WAG-71P13  
ctg7□ctg42□ctg35□WAG-76L15



ctg7□ctg42□ctg35□WAG-97N19  
ctg7□ctg42□ctg35□WAG-104M11  
ctg7□ctg42□ctg35□WAG-108O4  
ctg7□ctg42□ctg35□WAG-113M15  
ctg7□ctg42□ctg35□WAG-116G18  
ctg7□ctg42□ctg35□WAG-122L2  
ctg7□ctg42□ctg35□WAG-126F22  
ctg7□ctg6114□□WAG-54D3  
ctg7□ctg6114□□WAG-91E15  
ctg70□□□WAG-G21  
ctg70□ctg410□□WAG-15D21  
ctg70□ctg410□□WAG-70C22  
ctg70□ctg410□ctg705□WAG-8B19  
ctg70□ctg410□ctg705□WAG-12K23  
ctg70□ctg410□ctg705□WAG-17G15  
ctg70□ctg410□ctg705□WAG-34O10  
ctg70□ctg410□ctg705□WAG-38G3  
ctg70□ctg410□ctg705□WAG-52O2  
ctg70□ctg410□ctg705□WAG-53C17  
ctg70□ctg410□ctg705□WAG-81O23  
ctg70□ctg410□ctg705□WAG-104O4  
ctg70□ctg410□ctg705□WAG-105A15  
ctg700□ctg1493□□WAG-15K6  
ctg700□ctg1493□□WAG-37M5  
ctg700□ctg1493□□WAG-73B9  
ctg700□ctg1493□□WAG-74P9  
ctg700□ctg1493□ctg2978□WAG-11O5  
ctg700□ctg1493□ctg2978□WAG-68A12  
ctg700□ctg1493□ctg2978□WAG-78B14  
ctg700□ctg1493□ctg3513□WAG-11J17  
ctg700□ctg1493□ctg3513□WAG-126O23  
ctg700□ctg6188□□WAG-37D14  
ctg700□ctg6188□□WAG-72G10  
ctg701□ctg2044□□WAG-38L20  
ctg701□ctg2044□ctg1903□WAG-47L10  
ctg701□ctg2044□ctg1903□WAG-73J17  
ctg701□ctg2044□ctg1903□WAG-73K17  
ctg701□ctg2044□ctg1903□WAG-99H22  
ctg701□ctg2044□ctg1903□WAG-113I23  
ctg701□ctg3551□ctg3710□WAG-21I11  
ctg701□ctg3551□ctg3710□WAG-64H2  
ctg701□ctg3551□ctg3710□WAG-90L16  
ctg702□□□WAG-35E14  
ctg702□□□WAG-77D4  
ctg702□ctg2111□□WAG-41N22  
ctg702□ctg2111□ctg1976□WAG-10K23  
ctg702□ctg2111□ctg1976□WAG-33O8  
ctg702□ctg2111□ctg1976□WAG-74A9  
ctg702□ctg2111□ctg1976□WAG-130E17  
ctg703□□□WAG-29L5  
ctg703□ctg1853□□WAG-32D22  
ctg703□ctg1853□ctg1687□WAG-66A14  
ctg703□ctg1853□ctg1687□WAG-69B23  
ctg703□ctg1853□ctg1687□WAG-105K14  
ctg703□ctg1853□ctg1687□WAG-109L19  
ctg703□ctg1853□ctg5706□WAG-44H19

ctg703□ctg1853□ctg5706□WAG-113I15  
ctg704□□□WAG-2N17  
ctg704□ctg1764□□WAG-33J18  
ctg704□ctg1764□ctg2538□WAG-14C12  
ctg704□ctg1764□ctg2538□WAG-75L3  
ctg704□ctg1764□ctg2538□WAG-97D16  
ctg704□ctg1764□ctg2538□WAG-106O15  
ctg704□ctg1764□ctg5199□WAG-22B22  
ctg704□ctg1764□ctg5199□WAG-66E16  
ctg705□□□WAG-45E18  
ctg705□□□WAG-55B18  
ctg705□ctg2055□ctg1913□WAG-43G4  
ctg705□ctg2055□ctg1913□WAG-85F12  
ctg705□ctg2055□ctg1913□WAG-125I9  
ctg705□ctg2233□□WAG-91M17  
ctg705□ctg2233□ctg2130□WAG-50E23  
ctg705□ctg2233□ctg2130□WAG-83I17  
ctg705□ctg2233□ctg2130□WAG-109C17  
ctg705□ctg2233□ctg2130□WAG-117M19  
ctg706□ctg1497□ctg1346□WAG-22I23  
ctg706□ctg1497□ctg1346□WAG-37C16  
ctg706□ctg1497□ctg1346□WAG-61D11  
ctg706□ctg1497□ctg1346□WAG-127C15  
ctg706□ctg1497□ctg1346□WAG-127I19  
ctg707□ctg1499□ctg1347□WAG-44L7  
ctg707□ctg1499□ctg1347□WAG-60O12  
ctg707□ctg1499□ctg1347□WAG-63H8  
ctg707□ctg1499□ctg1347□WAG-120E9  
ctg708□□□WAG-116C2  
ctg708□ctg2230□ctg2864□WAG-10O3  
ctg708□ctg2230□ctg2864□WAG-24F13  
ctg708□ctg2230□ctg2864□WAG-47C3  
ctg708□ctg2230□ctg2864□WAG-68K14  
ctg708□ctg2230□ctg2864□WAG-84I18  
ctg708□ctg2230□ctg2864□WAG-92P19  
ctg709□ctg1822□□WAG-116P19  
ctg709□ctg1822□ctg1650□WAG-60D21  
ctg709□ctg1822□ctg1650□WAG-65F24  
ctg709□ctg1822□ctg1650□WAG-100E20  
ctg709□ctg1822□ctg1650□WAG-102H15  
ctg709□ctg1822□ctg1650□WAG-130B19  
ctg71□□□WAG-37C14  
ctg71□□□WAG-130G21  
ctg71□ctg1586□□WAG-29B1  
ctg71□ctg1586□ctg1451□WAG-4B24  
ctg71□ctg1586□ctg1451□WAG-37M1  
ctg71□ctg1586□ctg1451□WAG-38P17  
ctg71□ctg1586□ctg1451□WAG-128P24  
ctg71□ctg1586□ctg2037□WAG-29N11  
ctg71□ctg1586□ctg2037□WAG-77L15  
ctg71□ctg1586□ctg2037□WAG-96N20  
ctg71□ctg1586□ctg2037□WAG-109M23  
ctg71□ctg3701□ctg3906□WAG-89J9  
ctg71□ctg3701□ctg3906□WAG-116G10  
ctg71□ctg3701□ctg3906□WAG-124J11  
ctg710□□□WAG-90F5

ctg710□□□WAG-97D12  
ctg710□ctg1503□□WAG-5I15  
ctg710□ctg1503□□WAG-82A22  
ctg710□ctg1503□ctg2578□WAG-83L15  
ctg710□ctg1503□ctg2578□WAG-85F2  
ctg710□ctg1503□ctg2578□WAG-110L5  
ctg710□ctg1503□ctg5392□WAG-82L17  
ctg710□ctg1503□ctg5392□WAG-92A14  
ctg711□ctg1516□□WAG-82A5  
ctg711□ctg1516□ctg2906□WAG-2F7  
ctg711□ctg1516□ctg2906□WAG-2N3  
ctg711□ctg1516□ctg2906□WAG-35E15  
ctg711□ctg1516□ctg2906□WAG-37F9  
ctg711□ctg1516□ctg2906□WAG-66M6  
ctg711□ctg1516□ctg2906□WAG-125A9  
ctg712□□□WAG-28P22  
ctg712□ctg1824□□WAG-41L16  
ctg712□ctg1824□ctg1652□WAG-95G1  
ctg712□ctg1824□ctg1652□WAG-105D1  
ctg712□ctg1824□ctg1652□WAG-106I6  
ctg712□ctg1824□ctg1652□WAG-110J8  
ctg712□ctg2586□□WAG-71N4  
ctg712□ctg2586□ctg3373□WAG-31F3  
ctg712□ctg2586□ctg3373□WAG-87A1  
ctg712□ctg2586□ctg3373□WAG-129J2  
ctg713□□□WAG-39H21  
ctg713□□□WAG-40E17  
ctg713□□□WAG-76P16  
ctg713□□□WAG-81G3  
ctg713□ctg1828□□WAG-16P19  
ctg713□ctg1828□□WAG-76D8  
ctg713□ctg1828□□WAG-80E3  
ctg713□ctg1828□□WAG-110K19  
ctg713□ctg1828□ctg2150□WAG-62H13  
ctg713□ctg1828□ctg2150□WAG-75C15  
ctg713□ctg1828□ctg2150□WAG-88C8  
ctg713□ctg1828□ctg2150□WAG-99M20  
ctg713□ctg1828□ctg3989□WAG-48H19  
ctg713□ctg1828□ctg3989□WAG-50D17  
ctg713□ctg1828□ctg3989□WAG-101F5  
ctg713□ctg1828□ctg4512□WAG-11C13  
ctg713□ctg1828□ctg4512□WAG-44P22  
ctg714□□□WAG-36I5  
ctg714□□□WAG-88D13  
ctg714□ctg1505□□WAG-93M21  
ctg714□ctg1505□ctg1783□WAG-10D6  
ctg714□ctg1505□ctg1783□WAG-68J4  
ctg714□ctg1505□ctg1783□WAG-91H16  
ctg714□ctg1505□ctg1783□WAG-121L19  
ctg714□ctg1505□ctg2741□WAG-58F9  
ctg714□ctg1505□ctg2741□WAG-80L17  
ctg714□ctg1505□ctg2741□WAG-113K11  
ctg714□ctg1505□ctg2741□WAG-115G1  
ctg714□ctg1505□ctg2741□WAG-127O15  
ctg714□ctg1901□ctg2255□WAG-A2  
ctg714□ctg1901□ctg2255□WAG-26E24

ctg714□ctg1901□ctg2255□WAG-60H21  
ctg714□ctg1901□ctg2255□WAG-63D24  
ctg714□ctg1901□ctg4241□WAG-16B1  
ctg714□ctg1901□ctg4241□WAG-37O2  
ctg714□ctg1901□ctg4241□WAG-51A20  
ctg714□ctg1901□ctg4241□WAG-57B6  
ctg715□ctg1829□□WAG-42B6  
ctg715□ctg1829□ctg1658□WAG-50F1  
ctg715□ctg1829□ctg1658□WAG-69K21  
ctg715□ctg1829□ctg1658□WAG-74P2  
ctg715□ctg1829□ctg1658□WAG-117K14  
ctg716□ctg1674□□WAG-10D8  
ctg716□ctg1674□ctg1612□WAG-14N8  
ctg716□ctg1674□ctg1612□WAG-15O3  
ctg716□ctg1674□ctg1612□WAG-52B17  
ctg716□ctg1674□ctg1612□WAG-65N8  
ctg716□ctg1674□ctg1612□WAG-99A1  
ctg716□ctg1674□ctg1612□WAG-114M18  
ctg716□ctg5187□ctg5894□WAG-88H4  
ctg716□ctg5187□ctg5894□WAG-106F17  
ctg717□□□WAG-63I21  
ctg717□□□WAG-90J19  
ctg717□ctg1696□□WAG-82P21  
ctg717□ctg1696□ctg2632□WAG-18G16  
ctg717□ctg1696□ctg2632□WAG-64O16  
ctg717□ctg1696□ctg2632□WAG-79A4  
ctg717□ctg1696□ctg2632□WAG-97K8  
ctg717□ctg1696□ctg2632□WAG-103A21  
ctg717□ctg1696□ctg3987□WAG-16B22  
ctg717□ctg1696□ctg3987□WAG-80E2  
ctg717□ctg1696□ctg3987□WAG-125O17  
ctg718□□□WAG-21E24  
ctg718□ctg2136□□WAG-59M23  
ctg718□ctg2136□□WAG-90K24  
ctg718□ctg2136□ctg3937□WAG-12K18  
ctg718□ctg2136□ctg3937□WAG-43A12  
ctg718□ctg2136□ctg3937□WAG-51A7  
ctg718□ctg2136□ctg3937□WAG-107A20  
ctg718□ctg2136□ctg4555□WAG-89G15  
ctg718□ctg2136□ctg4555□WAG-107A6  
ctg718□ctg2136□ctg6600□WAG-72O22  
ctg718□ctg2136□ctg6600□WAG-113F19  
ctg719□□□WAG-120J5  
ctg719□ctg1834□ctg1664□WAG-89A18  
ctg719□ctg1834□ctg1664□WAG-104O15  
ctg719□ctg1834□ctg1664□WAG-108L6  
ctg72□□□WAG-7E4  
ctg72□ctg1202□□WAG-32K13  
ctg72□ctg1202□□WAG-42F17  
ctg72□ctg1202□ctg1382□WAG-57K16  
ctg72□ctg1202□ctg1382□WAG-64G21  
ctg72□ctg1202□ctg1382□WAG-65K1  
ctg72□ctg1202□ctg1382□WAG-67A24  
ctg72□ctg1202□ctg1382□WAG-84H24  
ctg72□ctg1202□ctg1382□WAG-121P4  
ctg72□ctg1202□ctg5669□WAG-85E21

ctg72□ctg1202□ctg5669□WAG-125K1  
ctg72□ctg5947□□WAG-27K16  
ctg72□ctg5947□□WAG-63N3  
ctg72□ctg634□ctg1073□WAG-1G14  
ctg72□ctg634□ctg1073□WAG-36J14  
ctg72□ctg634□ctg1073□WAG-46E11  
ctg72□ctg634□ctg1073□WAG-61N18  
ctg72□ctg634□ctg1073□WAG-83D19  
ctg72□ctg634□ctg1073□WAG-117P1  
ctg72□ctg634□ctg1073□WAG-119I4  
ctg72□ctg634□ctg619□WAG-17K20  
ctg72□ctg634□ctg619□WAG-20G18  
ctg72□ctg634□ctg619□WAG-35J8  
ctg72□ctg634□ctg619□WAG-46D13  
ctg72□ctg634□ctg619□WAG-58P2  
ctg72□ctg634□ctg619□WAG-69P15  
ctg72□ctg634□ctg619□WAG-86A20  
ctg72□ctg634□ctg619□WAG-88K3  
ctg72□ctg634□ctg619□WAG-91H24  
ctg72□ctg634□ctg619□WAG-98P23  
ctg72□ctg634□ctg619□WAG-105J6  
ctg72□ctg634□ctg619□WAG-119H19  
ctg72□ctg634□ctg619□WAG-123D24  
ctg72□ctg634□ctg619□WAG-129B2  
ctg72□ctg634□ctg619□WAG-130I5  
ctg720□ctg1518□□WAG-2P24  
ctg720□ctg1518□ctg1807□WAG-8M14  
ctg720□ctg1518□ctg1807□WAG-37F20  
ctg720□ctg1518□ctg1807□WAG-56D6  
ctg720□ctg1518□ctg1807□WAG-70C1  
ctg720□ctg1518□ctg1807□WAG-83A12  
ctg720□ctg1518□ctg1807□WAG-85E24  
ctg721□ctg1742□□WAG-43I19  
ctg721□ctg1742□□WAG-82C11  
ctg721□ctg1742□□WAG-89G11  
ctg721□ctg1742□ctg2654□WAG-13E21  
ctg721□ctg1742□ctg2654□WAG-58N6  
ctg721□ctg1742□ctg2654□WAG-79H10  
ctg721□ctg1742□ctg2654□WAG-107P24  
ctg721□ctg1742□ctg5468□WAG-37J12  
ctg721□ctg1742□ctg5468□WAG-40C21  
ctg722□□□WAG-36K1  
ctg722□□□WAG-45F1  
ctg722□□□WAG-45G2  
ctg722□ctg2153□□WAG-19J11  
ctg722□ctg2153□□WAG-23G3  
ctg722□ctg2153□□WAG-94N3  
ctg722□ctg2153□ctg2031□WAG-49A16  
ctg722□ctg2153□ctg2031□WAG-80K19  
ctg722□ctg2153□ctg2031□WAG-86O13  
ctg722□ctg5530□ctg6661□WAG-30K20  
ctg722□ctg5530□ctg6661□WAG-82O12  
ctg723□□□WAG-12N6  
ctg723□□□WAG-86P23  
ctg723□ctg2155□□WAG-21B22  
ctg723□ctg2155□□WAG-64N16

ctg723□ctg2155□□WAG-112B11  
ctg723□ctg2155□ctg2737□WAG-29N7  
ctg723□ctg2155□ctg2737□WAG-81C12  
ctg723□ctg2155□ctg2737□WAG-111C3  
ctg723□ctg4583□ctg4737□WAG-96N4  
ctg723□ctg4583□ctg4737□WAG-104J20  
ctg724□□□WAG-59M11  
ctg724□ctg2162□ctg2039□WAG-38F17  
ctg724□ctg2162□ctg2039□WAG-67J18  
ctg724□ctg2162□ctg2039□WAG-107B24  
ctg724□ctg4931□ctg5286□WAG-84H9  
ctg724□ctg4931□ctg5286□WAG-126L19  
ctg724□ctg6309□□WAG-6E7  
ctg724□ctg6309□□WAG-55N9  
ctg725□ctg1536□□WAG-26I20  
ctg725□ctg1536□□WAG-102N24  
ctg725□ctg1536□ctg1812□WAG-32J12  
ctg725□ctg1536□ctg1812□WAG-62P8  
ctg725□ctg1536□ctg1812□WAG-62P12  
ctg725□ctg1536□ctg1812□WAG-89C24  
ctg725□ctg1536□ctg1812□WAG-115M24  
ctg726□□□WAG-23P11  
ctg726□□□WAG-26P3  
ctg726□□□WAG-58M21  
ctg726□ctg1537□□WAG-2C9  
ctg726□ctg1537□ctg1828□WAG-72A23  
ctg726□ctg1537□ctg1828□WAG-81A15  
ctg726□ctg1537□ctg1828□WAG-94I9  
ctg726□ctg1537□ctg1828□WAG-100C9  
ctg726□ctg1537□ctg1828□WAG-100C13  
ctg727□□□WAG-31P20  
ctg727□ctg1759□□WAG-29E18  
ctg727□ctg1759□□WAG-57I11  
ctg727□ctg1759□□WAG-112P11  
ctg727□ctg1759□ctg2832□WAG-8B22  
ctg727□ctg1759□ctg2832□WAG-61L17  
ctg727□ctg1759□ctg2832□WAG-125P3  
ctg727□ctg1759□ctg3193□WAG-10J6  
ctg727□ctg1759□ctg3193□WAG-64D3  
ctg727□ctg1759□ctg3193□WAG-78N13  
ctg727□ctg3402□□WAG-41G3  
ctg727□ctg3402□ctg4434□WAG-46D3  
ctg727□ctg3402□ctg4434□WAG-96C19  
ctg728□□□WAG-37E18  
ctg728□□□WAG-72H10  
ctg728□ctg2186□□WAG-32J13  
ctg728□ctg2186□□WAG-60D20  
ctg728□ctg2186□□WAG-115J1  
ctg728□ctg2186□ctg2769□WAG-30B19  
ctg728□ctg2186□ctg2769□WAG-51C4  
ctg728□ctg2186□ctg2769□WAG-63G12  
ctg728□ctg2186□ctg2769□WAG-84M13  
ctg728□ctg2186□ctg2769□WAG-123O23  
ctg728□ctg5619□ctg6783□WAG-99D10  
ctg728□ctg5619□ctg6783□WAG-113I9  
ctg729□ctg1548□□WAG-124N14

ctg729□ctg1548□ctg2863□WAG-20F15  
ctg729□ctg1548□ctg2863□WAG-59C12  
ctg729□ctg1548□ctg2863□WAG-66M18  
ctg729□ctg1548□ctg2863□WAG-70K9  
ctg729□ctg1548□ctg2863□WAG-112K1  
ctg73□□□WAG-4N3  
ctg73□ctg300□ctg230□WAG-1L19  
ctg73□ctg300□ctg230□WAG-5I17  
ctg73□ctg300□ctg230□WAG-11P9  
ctg73□ctg300□ctg230□WAG-52J11  
ctg73□ctg300□ctg230□WAG-71D1  
ctg73□ctg300□ctg230□WAG-111P22  
ctg73□ctg300□ctg230□WAG-118C23  
ctg73□ctg300□ctg230□WAG-125K18  
ctg73□ctg300□ctg230□WAG-126I3  
ctg73□ctg300□ctg5267□WAG-35O4  
ctg73□ctg300□ctg5267□WAG-55J7  
ctg730□ctg1872□□□WAG-67I6  
ctg730□ctg1872□ctg2988□WAG-37A24  
ctg730□ctg1872□ctg2988□WAG-56M7  
ctg730□ctg1872□ctg2988□WAG-101F8  
ctg730□ctg1872□ctg4740□WAG-5G12  
ctg730□ctg1872□ctg4740□WAG-93M2  
ctg731□□□WAG-71A11  
ctg731□ctg1823□□□WAG-34J14  
ctg731□ctg1823□ctg1651□WAG-18G12  
ctg731□ctg1823□ctg1651□WAG-28O16  
ctg731□ctg1823□ctg1651□WAG-53D18  
ctg731□ctg1823□ctg1651□WAG-86C16  
ctg731□ctg1823□ctg1651□WAG-130L11  
ctg731□ctg2381□□□WAG-107F21  
ctg731□ctg2381□ctg2958□WAG-11D4  
ctg731□ctg2381□ctg2958□WAG-40G17  
ctg731□ctg2381□ctg2958□WAG-130A24  
ctg732□□□WAG-59N24  
ctg732□□□WAG-89F5  
ctg732□ctg2552□ctg2479□WAG-11K22  
ctg732□ctg2552□ctg2479□WAG-41F2  
ctg732□ctg2552□ctg2479□WAG-93C10  
ctg732□ctg2552□ctg2479□WAG-93P23  
ctg732□ctg4937□ctg5296□WAG-67E5  
ctg732□ctg4937□ctg5296□WAG-116H5  
ctg732□ctg5910□□□WAG-75O20  
ctg732□ctg5910□□□WAG-128C3  
ctg733□□□WAG-6O5  
ctg733□□□WAG-77G3  
ctg733□□□WAG-80B23  
ctg733□□□WAG-95N23  
ctg733□ctg2539□□□WAG-15A24  
ctg733□ctg2539□ctg2466□WAG-67M20  
ctg733□ctg2539□ctg2466□WAG-94K9  
ctg733□ctg2539□ctg2466□WAG-96E10  
ctg733□ctg2539□ctg2466□WAG-130L14  
ctg734□ctg1830□ctg1659□WAG-61D5  
ctg734□ctg1830□ctg1659□WAG-73J23  
ctg734□ctg1830□ctg1659□WAG-77O8

ctg734□ctg1830□ctg1659□WAG-110B8  
ctg734□ctg5917□□WAG-64F17  
ctg734□ctg5917□□WAG-87K5  
ctg735□ctg1554□□WAG-23H21  
ctg735□ctg1554□□WAG-98M15  
ctg735□ctg1554□□WAG-120H11  
ctg735□ctg1554□ctg2417□WAG-71H24  
ctg735□ctg1554□ctg2417□WAG-80O5  
ctg735□ctg1554□ctg2417□WAG-124D11  
ctg736□ctg1879□□WAG-19P7  
ctg736□ctg1879□ctg1713□WAG-8C9  
ctg736□ctg1879□ctg1713□WAG-11E12  
ctg736□ctg1879□ctg1713□WAG-60D15  
ctg736□ctg1879□ctg1713□WAG-109O19  
ctg736□ctg1879□ctg1713□WAG-119D19  
ctg736□ctg5886□□WAG-43I8  
ctg736□ctg5886□□WAG-130B5  
ctg737□ctg1558□ctg1648□WAG-26I24  
ctg737□ctg1558□ctg1648□WAG-109F20  
ctg737□ctg1558□ctg1648□WAG-111J20  
ctg737□ctg1558□ctg1648□WAG-116N4  
ctg737□ctg1558□ctg1648□WAG-122F8  
ctg738□□□WAG-18E2  
ctg738□□□WAG-32D24  
ctg738□ctg1690□□WAG-16L15  
ctg738□ctg1690□□WAG-67M24  
ctg738□ctg1690□□WAG-104A7  
ctg738□ctg1690□□WAG-110C4  
ctg738□ctg1690□ctg2682□WAG-77K16  
ctg738□ctg1690□ctg2682□WAG-121H7  
ctg738□ctg1690□ctg2682□WAG-127J20  
ctg738□ctg2297□□WAG-20I12  
ctg738□ctg2297□ctg2966□WAG-27C18  
ctg738□ctg2297□ctg2966□WAG-35J14  
ctg738□ctg2297□ctg2966□WAG-72L19  
ctg738□ctg2297□ctg2966□WAG-79A2  
ctg738□ctg3425□ctg3533□WAG-108J15  
ctg738□ctg3425□ctg3533□WAG-108J17  
ctg738□ctg5312□ctg6186□WAG-4K23  
ctg738□ctg5312□ctg6186□WAG-15C8  
ctg739□ctg1840□□WAG-94C12  
ctg739□ctg1840□ctg2243□WAG-51L13  
ctg739□ctg1840□ctg2243□WAG-92F16  
ctg739□ctg1840□ctg2243□WAG-129L8  
ctg739□ctg5666□ctg6838□WAG-21E18  
ctg739□ctg5666□ctg6838□WAG-76A3  
ctg739□ctg6174□□WAG-13L20  
ctg739□ctg6174□□WAG-122N24  
ctg74□□□WAG-87F18  
ctg74□ctg488□ctg400□WAG-25J18  
ctg74□ctg488□ctg400□WAG-31F7  
ctg74□ctg488□ctg400□WAG-52I10  
ctg74□ctg488□ctg400□WAG-60D14  
ctg74□ctg488□ctg400□WAG-87O13  
ctg74□ctg488□ctg400□WAG-88P19  
ctg74□ctg488□ctg400□WAG-91I18



ctg74□ctg488□ctg400□WAG-100K1  
ctg74□ctg488□ctg400□WAG-107A23  
ctg74□ctg488□ctg400□WAG-120D4  
ctg740□ctg1565□ctg1405□WAG-83P12  
ctg740□ctg1565□ctg1405□WAG-111D1  
ctg740□ctg1565□ctg1405□WAG-115G3  
ctg740□ctg1565□ctg1405□WAG-126L2  
ctg741□ctg1576□□WAG-37G22  
ctg741□ctg1576□□WAG-43G11  
ctg741□ctg1576□ctg2193□WAG-65C14  
ctg741□ctg1576□ctg2193□WAG-67D11  
ctg741□ctg1576□ctg2193□WAG-68E11  
ctg741□ctg1576□ctg2193□WAG-69H5  
ctg741□ctg1576□ctg2193□WAG-118F4  
ctg741□ctg2555□ctg2506□WAG-17H14  
ctg741□ctg2555□ctg2506□WAG-21K7  
ctg741□ctg2555□ctg2506□WAG-62F18  
ctg741□ctg2555□ctg2506□WAG-77B22  
ctg742□ctg1577□□WAG-27B2  
ctg742□ctg1577□ctg2574□WAG-28P11  
ctg742□ctg1577□ctg2574□WAG-59F16  
ctg742□ctg1577□ctg2574□WAG-82N10  
ctg742□ctg1577□ctg2574□WAG-102N8  
ctg742□ctg1577□ctg2574□WAG-124J4  
ctg743□ctg1578□ctg1422□WAG-5I12  
ctg743□ctg1578□ctg1422□WAG-19O6  
ctg743□ctg1578□ctg1422□WAG-24H10  
ctg743□ctg1578□ctg1422□WAG-30A16  
ctg743□ctg1578□ctg1422□WAG-43M17  
ctg744□ctg1579□□WAG-66A1  
ctg744□ctg1579□ctg2867□WAG-18F21  
ctg744□ctg1579□ctg2867□WAG-19B8  
ctg744□ctg1579□ctg2867□WAG-41P18  
ctg744□ctg1579□ctg2867□WAG-66F19  
ctg744□ctg1579□ctg2867□WAG-95O5  
ctg744□ctg1579□ctg2867□WAG-115F17  
ctg745□□□WAG-127H21  
ctg745□ctg2275□□WAG-74G18  
ctg745□ctg2275□□WAG-94F10  
ctg745□ctg2275□ctg2360□WAG-65B11  
ctg745□ctg2275□ctg2360□WAG-83C14  
ctg745□ctg2275□ctg2360□WAG-122A18  
ctg746□□□WAG-117M5  
ctg746□ctg1852□□WAG-13H12  
ctg746□ctg1852□ctg2266□WAG-50F4  
ctg746□ctg1852□ctg2266□WAG-53J5  
ctg746□ctg1852□ctg2266□WAG-111E5  
ctg746□ctg1852□ctg2266□WAG-119F12  
ctg747□□□WAG-12O24  
ctg747□□□WAG-45O18  
ctg747□ctg2102□ctg1966□WAG-18E16  
ctg747□ctg2102□ctg1966□WAG-44D16  
ctg747□ctg2102□ctg1966□WAG-49M20  
ctg747□ctg2102□ctg1966□WAG-51J16  
ctg747□ctg5943□□WAG-35J10  
ctg747□ctg5943□□WAG-78E11

ctg748□ctg1587□□WAG-87F11  
ctg748□ctg1587□□WAG-128C7  
ctg748□ctg1587□ctg1894□WAG-8I24  
ctg748□ctg1587□ctg1894□WAG-48E6  
ctg748□ctg1587□ctg1894□WAG-90N19  
ctg748□ctg1587□ctg1894□WAG-92P16  
ctg749□ctg1993□□WAG-37D6  
ctg749□ctg1993□□WAG-62K2  
ctg749□ctg1993□□WAG-69O8  
ctg749□ctg1993□ctg1838□WAG-37H10  
ctg749□ctg1993□ctg1838□WAG-51J2  
ctg749□ctg1993□ctg1838□WAG-89K1  
ctg749□ctg1993□ctg1838□WAG-102F22  
ctg749□ctg1993□ctg1838□WAG-103H17  
ctg749□ctg1993□ctg1838□WAG-113E15  
ctg749□ctg1993□ctg6200□WAG-49F2  
ctg749□ctg1993□ctg6200□WAG-107A16  
ctg75□□□WAG-3N6  
ctg75□□□WAG-10P21  
ctg75□□□WAG-102O15  
ctg75□ctg1948□□WAG-55J15  
ctg75□ctg1948□□WAG-91F6  
ctg75□ctg1948□ctg3050□WAG-29P9  
ctg75□ctg1948□ctg3050□WAG-40I13  
ctg75□ctg1948□ctg3050□WAG-78I16  
ctg75□ctg1948□ctg3050□WAG-85J21  
ctg75□ctg2385□ctg2282□WAG-47A18  
ctg75□ctg2385□ctg2282□WAG-70L9  
ctg75□ctg2385□ctg2282□WAG-75I11  
ctg75□ctg244□□WAG-68M18  
ctg75□ctg244□ctg323□WAG-29D13  
ctg75□ctg244□ctg323□WAG-31E12  
ctg75□ctg244□ctg323□WAG-36P10  
ctg75□ctg244□ctg323□WAG-40K2  
ctg75□ctg244□ctg323□WAG-76F14  
ctg75□ctg244□ctg323□WAG-87I8  
ctg75□ctg244□ctg323□WAG-112E2  
ctg75□ctg244□ctg323□WAG-113M4  
ctg75□ctg3411□□WAG-121F5  
ctg75□ctg3411□ctg3512□WAG-75D16  
ctg75□ctg3411□ctg3512□WAG-129K6  
ctg75□ctg6392□□WAG-14B1  
ctg75□ctg6392□□WAG-67L3  
ctg750□□□WAG-115C7  
ctg750□ctg1857□□WAG-15C7  
ctg750□ctg1857□ctg2284□WAG-40L8  
ctg750□ctg1857□ctg2284□WAG-70O13  
ctg750□ctg1857□ctg2284□WAG-86F9  
ctg750□ctg6244□□WAG-13H19  
ctg750□ctg6244□□WAG-60I22  
ctg751□ctg1594□ctg1441□WAG-26F8  
ctg751□ctg1594□ctg1441□WAG-32H8  
ctg751□ctg1594□ctg1441□WAG-49N9  
ctg751□ctg1594□ctg1441□WAG-50B2  
ctg751□ctg1594□ctg1441□WAG-91D24  
ctg751□ctg1594□ctg1441□WAG-130F1

ctg752□□□WAG-106I2  
ctg752□ctg1910□□WAG-10K18  
ctg752□ctg1910□□WAG-11C19  
ctg752□ctg1910□ctg2385□WAG-36G14  
ctg752□ctg1910□ctg2385□WAG-77C14  
ctg752□ctg1910□ctg2385□WAG-111B6  
ctg753□ctg1595□□WAG-7J8  
ctg753□ctg1595□□WAG-77B23  
ctg753□ctg1595□ctg2341□WAG-21G6  
ctg753□ctg1595□ctg2341□WAG-85B13  
ctg753□ctg1595□ctg2341□WAG-93E15  
ctg753□ctg1595□ctg2341□WAG-129E10  
ctg753□ctg3652□ctg3846□WAG-15B22  
ctg753□ctg3652□ctg3846□WAG-46H8  
ctg753□ctg3652□ctg3846□WAG-102F4  
ctg753□ctg3652□ctg5100□WAG-50O1  
ctg753□ctg3652□ctg5100□WAG-92M8  
ctg754□□□WAG-7E8  
ctg754□□□WAG-7M9  
ctg754□□□WAG-13B2  
ctg754□ctg1600□ctg1447□WAG-54E17  
ctg754□ctg1600□ctg1447□WAG-87P14  
ctg754□ctg1600□ctg1447□WAG-96E21  
ctg754□ctg1600□ctg1447□WAG-97N6  
ctg754□ctg1600□ctg1447□WAG-125B9  
ctg755□□□WAG-18F19  
ctg755□□□WAG-19E4  
ctg755□□□WAG-86E19  
ctg755□ctg2627□□WAG-109N21  
ctg755□ctg2627□ctg2591□WAG-31B11  
ctg755□ctg2627□ctg2591□WAG-65H15  
ctg755□ctg2627□ctg2591□WAG-71P4  
ctg755□ctg2627□ctg2591□WAG-87E16  
ctg755□ctg2627□ctg2591□WAG-109H13  
ctg755□ctg2627□ctg4545□WAG-26A7  
ctg755□ctg2627□ctg4545□WAG-47O3  
ctg756□ctg1922□ctg1759□WAG-35I23  
ctg756□ctg1922□ctg1759□WAG-67K12  
ctg756□ctg1922□ctg1759□WAG-82D3  
ctg756□ctg1922□ctg1759□WAG-98F10  
ctg756□ctg1922□ctg1759□WAG-112L12  
ctg756□ctg4064□□WAG-29P24  
ctg756□ctg4064□□WAG-121L23  
ctg756□ctg4064□ctg6076□WAG-12K7  
ctg756□ctg4064□ctg6076□WAG-60N19  
ctg756□ctg4651□□WAG-8J8  
ctg756□ctg4651□□WAG-26I6  
ctg756□ctg4651□□WAG-80H5  
ctg757□ctg1605□ctg1839□WAG-15K11  
ctg757□ctg1605□ctg1839□WAG-104F3  
ctg757□ctg1605□ctg1839□WAG-105G14  
ctg757□ctg1605□ctg1839□WAG-106M22  
ctg757□ctg1605□ctg1839□WAG-111F10  
ctg758□□□WAG-24N8  
ctg758□□□WAG-94D7  
ctg758□ctg1611□□WAG-50B12

ctg758□ctg1611□ctg2412□WAG-20I15  
ctg758□ctg1611□ctg2412□WAG-21O11  
ctg758□ctg1611□ctg2412□WAG-88B8  
ctg758□ctg1611□ctg4043□WAG-6P18  
ctg758□ctg1611□ctg4043□WAG-35F23  
ctg758□ctg1611□ctg4043□WAG-51P3  
ctg758□ctg1611□ctg4043□WAG-88D3  
ctg758□ctg1611□ctg6806□WAG-26P8  
ctg758□ctg1611□ctg6806□WAG-37L14  
ctg758□ctg2398□ctg2298□WAG-51B14  
ctg758□ctg2398□ctg2298□WAG-55H4  
ctg758□ctg2398□ctg2298□WAG-63A1  
ctg758□ctg2398□ctg2298□WAG-93I5  
ctg758□ctg5534□ctg6666□WAG-19M1  
ctg758□ctg5534□ctg6666□WAG-31J2  
ctg759□ctg1882□□WAG-107L13  
ctg759□ctg1882□ctg1897□WAG-7G3  
ctg759□ctg1882□ctg1897□WAG-17A16  
ctg759□ctg1882□ctg1897□WAG-49D1  
ctg759□ctg1882□ctg1897□WAG-103K18  
ctg759□ctg1882□ctg1897□WAG-113F12  
ctg76□□□WAG-14G22  
ctg76□ctg1317□ctg1170□WAG-40G14  
ctg76□ctg1317□ctg1170□WAG-61K10  
ctg76□ctg1317□ctg1170□WAG-83M12  
ctg76□ctg1317□ctg1170□WAG-94I16  
ctg76□ctg1317□ctg1170□WAG-119B21  
ctg76□ctg348□□WAG-67L16  
ctg76□ctg348□□WAG-68L13  
ctg76□ctg348□ctg3187□WAG-23H19  
ctg76□ctg348□ctg3187□WAG-61E17  
ctg76□ctg348□ctg3187□WAG-67M17  
ctg76□ctg348□ctg3187□WAG-119E1  
ctg76□ctg348□ctg3187□WAG-128M24  
ctg76□ctg348□ctg351□WAG-22B16  
ctg76□ctg348□ctg351□WAG-42N3  
ctg76□ctg348□ctg351□WAG-44O13  
ctg76□ctg348□ctg351□WAG-49I18  
ctg76□ctg348□ctg351□WAG-63G5  
ctg76□ctg348□ctg351□WAG-113A14  
ctg76□ctg348□ctg351□WAG-122C19  
ctg76□ctg348□ctg351□WAG-123E20  
ctg76□ctg348□ctg487□WAG-10A23  
ctg76□ctg348□ctg487□WAG-15E22  
ctg76□ctg348□ctg487□WAG-23G4  
ctg76□ctg348□ctg487□WAG-83N15  
ctg76□ctg348□ctg487□WAG-91L13  
ctg76□ctg348□ctg487□WAG-91N6  
ctg76□ctg348□ctg487□WAG-98K7  
ctg76□ctg348□ctg487□WAG-101L19  
ctg76□ctg348□ctg487□WAG-127A7  
ctg76□ctg3789□ctg4041□WAG-95J18  
ctg76□ctg3789□ctg4041□WAG-107A7  
ctg76□ctg3789□ctg4041□WAG-121P8  
ctg76□ctg5726□□WAG-18A18  
ctg76□ctg5726□□WAG-75M4

ctg760□□□WAG-20P12  
ctg760□ctg1934□ctg1772□WAG-24K24  
ctg760□ctg1934□ctg1772□WAG-34N8  
ctg760□ctg1934□ctg1772□WAG-66K15  
ctg760□ctg1934□ctg1772□WAG-72B19  
ctg760□ctg1934□ctg1772□WAG-94E13  
ctg761□ctg1884□□WAG-33N16  
ctg761□ctg1884□□WAG-67H4  
ctg761□ctg1884□ctg2318□WAG-66H1  
ctg761□ctg1884□ctg2318□WAG-85K18  
ctg761□ctg1884□ctg2318□WAG-90D20  
ctg761□ctg1884□ctg2318□WAG-93G20  
ctg761□ctg1884□ctg2318□WAG-124A23  
ctg762□ctg1614□ctg1468□WAG-52F8  
ctg762□ctg1614□ctg1468□WAG-63C1  
ctg762□ctg1614□ctg1468□WAG-108J5  
ctg762□ctg1614□ctg1468□WAG-121B4  
ctg763□□□WAG-64A10  
ctg763□ctg1936□ctg1774□WAG-20C12  
ctg763□ctg1936□ctg1774□WAG-37E23  
ctg763□ctg1936□ctg1774□WAG-99H24  
ctg763□ctg1936□ctg1774□WAG-123K5  
ctg764□ctg1887□□WAG-72L1  
ctg764□ctg1887□ctg2235□WAG-18J23  
ctg764□ctg1887□ctg2235□WAG-36H23  
ctg764□ctg1887□ctg2235□WAG-46J10  
ctg764□ctg1887□ctg2235□WAG-118K11  
ctg764□ctg1887□ctg3382□WAG-54D2  
ctg764□ctg1887□ctg3382□WAG-77A5  
ctg764□ctg1887□ctg3382□WAG-81K11  
ctg764□ctg1887□ctg3382□WAG-85D20  
ctg764□ctg1887□ctg3382□WAG-88H14  
ctg764□ctg1887□ctg3382□WAG-130F3  
ctg764□ctg5185□ctg5890□WAG-62K11  
ctg764□ctg5185□ctg5890□WAG-113A8  
ctg765□□□WAG-11G16  
ctg765□□□WAG-13F9  
ctg765□ctg2462□□WAG-73H14  
ctg765□ctg2462□ctg3834□WAG-23C13  
ctg765□ctg2462□ctg3834□WAG-107I15  
ctg765□ctg2462□ctg3834□WAG-127P11  
ctg765□ctg2462□ctg3911□WAG-22A9  
ctg765□ctg2462□ctg3911□WAG-30J14  
ctg765□ctg2462□ctg3911□WAG-94A3  
ctg765□ctg2462□ctg3911□WAG-104F11  
ctg765□ctg2462□ctg4220□WAG-21I6  
ctg765□ctg2462□ctg4220□WAG-86D3  
ctg765□ctg2462□ctg4220□WAG-101L9  
ctg765□ctg2462□ctg4220□WAG-107C1  
ctg766□ctg1942□ctg2316□WAG-34K14  
ctg766□ctg1942□ctg2316□WAG-37N2  
ctg766□ctg1942□ctg2316□WAG-55C6  
ctg766□ctg1942□ctg2316□WAG-63K5  
ctg766□ctg1942□ctg2316□WAG-111K18  
ctg767□ctg1707□□WAG-11D9  
ctg767□ctg1707□□WAG-34P16

ctg767□ctg1707□□WAG-77P22  
ctg767□ctg1707□ctg2076□WAG-40F14  
ctg767□ctg1707□ctg2076□WAG-46D10  
ctg767□ctg1707□ctg2076□WAG-50G19  
ctg767□ctg1707□ctg2076□WAG-54H23  
ctg768□□□WAG-4M11  
ctg768□□□WAG-15C22  
ctg768□□□WAG-23M16  
ctg768□□□WAG-66F7  
ctg768□□□WAG-84E14  
ctg768□ctg1624□□WAG-23D10  
ctg768□ctg1624□□WAG-38F4  
ctg768□ctg1624□□WAG-44O20  
ctg768□ctg1624□ctg1861□WAG-32L9  
ctg768□ctg1624□ctg1861□WAG-36K11  
ctg768□ctg1624□ctg1861□WAG-37F7  
ctg768□ctg1624□ctg1861□WAG-65C16  
ctg768□ctg1624□ctg1861□WAG-98K2  
ctg768□ctg1624□ctg2725□WAG-14D11  
ctg768□ctg1624□ctg2725□WAG-37G3  
ctg768□ctg1624□ctg2725□WAG-91K18  
ctg768□ctg1624□ctg2725□WAG-95C5  
ctg768□ctg1624□ctg6179□WAG-43D12  
ctg768□ctg1624□ctg6179□WAG-76E7  
ctg768□ctg5182□ctg5886□WAG-100B6  
ctg768□ctg5182□ctg5886□WAG-115M11  
ctg769□□□WAG-69L9  
ctg769□□□WAG-114I17  
ctg769□ctg1947□ctg1794□WAG-53C7  
ctg769□ctg1947□ctg1794□WAG-99O17  
ctg769□ctg1947□ctg1794□WAG-127E9  
ctg769□ctg1947□ctg1794□WAG-127K4  
ctg769□ctg2665□□WAG-65N15  
ctg769□ctg2665□□WAG-93J12  
ctg769□ctg2665□□WAG-95P20  
ctg769□ctg2665□ctg3233□WAG-86P9  
ctg769□ctg2665□ctg3233□WAG-88K12  
ctg769□ctg2665□ctg3233□WAG-125D8  
ctg77□□□WAG-24C20  
ctg77□ctg319□□WAG-46K18  
ctg77□ctg319□ctg304□WAG-8G22  
ctg77□ctg319□ctg304□WAG-49C21  
ctg77□ctg319□ctg304□WAG-50A8  
ctg77□ctg319□ctg304□WAG-54C21  
ctg77□ctg319□ctg304□WAG-80E18  
ctg77□ctg319□ctg304□WAG-85D10  
ctg77□ctg319□ctg304□WAG-97D24  
ctg77□ctg319□ctg304□WAG-102P4  
ctg77□ctg319□ctg304□WAG-119M20  
ctg77□ctg319□ctg304□WAG-122D2  
ctg770□□□WAG-6H17  
ctg770□ctg2269□ctg2925□WAG-46K8  
ctg770□ctg2269□ctg2925□WAG-103B7  
ctg770□ctg2269□ctg2925□WAG-108K9  
ctg770□ctg2269□ctg2925□WAG-119A15  
ctg770□ctg2269□ctg3679□WAG-36M16

ctg770□ctg2269□ctg3679□WAG-78O8  
ctg770□ctg2269□ctg3679□WAG-110B1  
ctg771□ctg1625□ctg1629□WAG-22B7  
ctg771□ctg1625□ctg1629□WAG-41O17  
ctg771□ctg1625□ctg1629□WAG-80D21  
ctg771□ctg1625□ctg1629□WAG-101P19  
ctg771□ctg1625□ctg1629□WAG-116L3  
ctg772□ctg1957□ctg1918□WAG-C21  
ctg772□ctg1957□ctg1918□WAG-12E20  
ctg772□ctg1957□ctg1918□WAG-47G20  
ctg772□ctg1957□ctg1918□WAG-61C22  
ctg772□ctg1957□ctg1918□WAG-102L13  
ctg773□□□WAG-38M8  
ctg773□□□WAG-92D22  
ctg773□ctg2271□ctg3843□WAG-2F13  
ctg773□ctg2271□ctg3843□WAG-39P16  
ctg773□ctg2271□ctg3843□WAG-43M1  
ctg773□ctg2271□ctg3843□WAG-79L23  
ctg773□ctg2271□ctg3843□WAG-90D3  
ctg774□□□WAG-33M13  
ctg774□ctg1771□□WAG-85M7  
ctg774□ctg1771□ctg2077□WAG-14B17  
ctg774□ctg1771□ctg2077□WAG-21F7  
ctg774□ctg1771□ctg2077□WAG-51B18  
ctg774□ctg1771□ctg2077□WAG-90A9  
ctg774□ctg1771□ctg2077□WAG-92N10  
ctg774□ctg1771□ctg2077□WAG-96G21  
ctg775□□□WAG-39J1  
ctg775□ctg1904□ctg2931□WAG-13J9  
ctg775□ctg1904□ctg2931□WAG-101P18  
ctg775□ctg1904□ctg2931□WAG-111J14  
ctg775□ctg1904□ctg2931□WAG-120A20  
ctg775□ctg1904□ctg2931□WAG-128L23  
ctg776□ctg1994□□WAG-56N3  
ctg776□ctg1994□□WAG-68J3  
ctg776□ctg1994□ctg1840□WAG-55D15  
ctg776□ctg1994□ctg1840□WAG-67K5  
ctg776□ctg1994□ctg1840□WAG-68L10  
ctg776□ctg1994□ctg1840□WAG-70D4  
ctg776□ctg1994□ctg1840□WAG-81N3  
ctg777□□□WAG-37O16  
ctg777□ctg1975□□WAG-17G9  
ctg777□ctg1975□□WAG-50C24  
ctg777□ctg1975□ctg1824□WAG-46D15  
ctg777□ctg1975□ctg1824□WAG-70F13  
ctg777□ctg1975□ctg1824□WAG-83M19  
ctg777□ctg4422□□WAG-59B1  
ctg777□ctg4422□ctg6178□WAG-44I21  
ctg777□ctg4422□ctg6178□WAG-100K23  
ctg778□ctg1644□□WAG-71C8  
ctg778□ctg1644□ctg1901□WAG-26F2  
ctg778□ctg1644□ctg1901□WAG-63I2  
ctg778□ctg1644□ctg1901□WAG-113C19  
ctg778□ctg1644□ctg1901□WAG-123A11  
ctg779□ctg1758□□WAG-76A15  
ctg779□ctg1758□ctg1832□WAG-13L5

ctg779□ctg1758□ctg1832□WAG-75J2  
ctg779□ctg1758□ctg1832□WAG-75K7  
ctg779□ctg1758□ctg1832□WAG-99M23  
ctg78□ctg250□ctg334□WAG-4A15  
ctg78□ctg250□ctg334□WAG-28F9  
ctg78□ctg250□ctg334□WAG-47E18  
ctg78□ctg250□ctg334□WAG-50E1  
ctg78□ctg250□ctg334□WAG-55A16  
ctg78□ctg250□ctg334□WAG-62E23  
ctg78□ctg250□ctg334□WAG-84F24  
ctg78□ctg250□ctg334□WAG-89F21  
ctg78□ctg250□ctg334□WAG-91O4  
ctg78□ctg250□ctg334□WAG-101P22  
ctg780□□□WAG-40K12  
ctg780□ctg1983□ctg1833□WAG-24C13  
ctg780□ctg1983□ctg1833□WAG-52G1  
ctg780□ctg1983□ctg1833□WAG-72F1  
ctg780□ctg1983□ctg1833□WAG-118I4  
ctg781□□□WAG-4B2  
ctg781□□□WAG-6E10  
ctg781□□□WAG-6P22  
ctg781□□□WAG-38H20  
ctg781□ctg2566□□WAG-106B7  
ctg781□ctg2566□ctg2510□WAG-18E9  
ctg781□ctg2566□ctg2510□WAG-31I10  
ctg781□ctg2566□ctg2510□WAG-43K18  
ctg781□ctg2566□ctg2510□WAG-85C4  
ctg781□ctg2566□ctg2510□WAG-105G18  
ctg781□ctg2566□ctg2510□WAG-128G18  
ctg781□ctg2750□ctg4585□WAG-53K2  
ctg781□ctg2750□ctg4585□WAG-70L22  
ctg781□ctg2750□ctg6036□WAG-35J3  
ctg781□ctg2750□ctg6036□WAG-67G22  
ctg782□ctg1908□ctg2405□WAG-10F23  
ctg782□ctg1908□ctg2405□WAG-13H18  
ctg782□ctg1908□ctg2405□WAG-30D1  
ctg782□ctg1908□ctg2405□WAG-56E8  
ctg782□ctg1908□ctg2405□WAG-84I6  
ctg782□ctg1908□ctg2405□WAG-89A23  
ctg783□□□WAG-2H22  
ctg783□□□WAG-4G21  
ctg783□□□WAG-62I10  
ctg783□□□WAG-88B5  
ctg783□□□WAG-116J24  
ctg783□□□WAG-122P6  
ctg783□ctg1647□ctg1504□WAG-16M3  
ctg783□ctg1647□ctg1504□WAG-53G10  
ctg783□ctg1647□ctg1504□WAG-75C21  
ctg783□ctg1647□ctg1504□WAG-91I16  
ctg783□ctg1647□ctg1504□WAG-97G11  
ctg783□ctg2723□ctg2708□WAG-11I4  
ctg783□ctg2723□ctg2708□WAG-39C2  
ctg783□ctg2723□ctg2708□WAG-92B18  
ctg783□ctg2723□ctg2708□WAG-123F9  
ctg783□ctg2874□□WAG-83A11  
ctg783□ctg2874□□WAG-97L8



ctg783□ctg2874□ctg3735□WAG-58I17  
ctg783□ctg2874□ctg3735□WAG-85D24  
ctg783□ctg2874□ctg3735□WAG-117B2  
ctg783□ctg2874□ctg3735□WAG-126D23  
ctg783□ctg2874□ctg4352□WAG-7L21  
ctg783□ctg2874□ctg4352□WAG-91O8  
ctg783□ctg2874□ctg4352□WAG-124I2  
ctg783□ctg6508□□WAG-8P2  
ctg783□ctg6508□□WAG-126I16  
ctg784□ctg1925□ctg1762□WAG-13N3  
ctg784□ctg1925□ctg1762□WAG-14F20  
ctg784□ctg1925□ctg1762□WAG-51A23  
ctg784□ctg1925□ctg1762□WAG-69L20  
ctg784□ctg1925□ctg1762□WAG-125N16  
ctg785□ctg2313□□WAG-3M10  
ctg785□ctg2313□□WAG-10M13  
ctg785□ctg2313□□WAG-38L13  
ctg785□ctg2313□□WAG-38L24  
ctg785□ctg2313□□WAG-121D21  
ctg785□ctg2313□ctg4082□WAG-29F11  
ctg785□ctg2313□ctg4082□WAG-40M13  
ctg785□ctg2313□ctg4082□WAG-51P19  
ctg786□□□WAG-36A21  
ctg786□ctg2194□□WAG-12I21  
ctg786□ctg2194□□WAG-107K3  
ctg786□ctg2194□□WAG-108J9  
ctg786□ctg2194□ctg2872□WAG-84L21  
ctg786□ctg2194□ctg2872□WAG-125C5  
ctg786□ctg2194□ctg2872□WAG-130E15  
ctg786□ctg2194□ctg3596□WAG-45D13  
ctg786□ctg2194□ctg3596□WAG-63F19  
ctg787□ctg1928□□WAG-40K16  
ctg787□ctg1928□□WAG-62J14  
ctg787□ctg1928□ctg1765□WAG-59P11  
ctg787□ctg1928□ctg1765□WAG-100J12  
ctg787□ctg1928□ctg1765□WAG-108D20  
ctg787□ctg1928□ctg1765□WAG-116G19  
ctg788□□□WAG-46N18  
ctg788□ctg1929□□WAG-9H14  
ctg788□ctg1929□□WAG-111E17  
ctg788□ctg1929□ctg2224□WAG-89A1  
ctg788□ctg1929□ctg2224□WAG-101D15  
ctg789□ctg1935□□WAG-37D10  
ctg789□ctg1935□□WAG-59D18  
ctg789□ctg1935□□WAG-121P14  
ctg789□ctg1935□ctg3068□WAG-42P20  
ctg789□ctg1935□ctg3068□WAG-49F1  
ctg789□ctg1935□ctg3068□WAG-72B5  
ctg789□ctg1935□ctg3068□WAG-83C15  
ctg789□ctg1935□ctg3068□WAG-88G21  
ctg789□ctg1935□ctg3068□WAG-126C19  
ctg789□ctg2234□ctg2531□WAG-3P21  
ctg789□ctg2234□ctg2531□WAG-43B18  
ctg789□ctg2234□ctg2531□WAG-64A6  
ctg789□ctg2234□ctg2531□WAG-97I15  
ctg789□ctg2234□ctg2531□WAG-117M11

ctg789□ctg3856□ctg4128□WAG-34C11  
ctg789□ctg3856□ctg4128□WAG-52H16  
ctg79□□□WAG-83E12  
ctg79□□□WAG-91J9  
ctg79□□□WAG-117F2  
ctg79□ctg1485□ctg1750□WAG-65N4  
ctg79□ctg1485□ctg1750□WAG-90D21  
ctg79□ctg1485□ctg1750□WAG-91H11  
ctg79□ctg1485□ctg1750□WAG-94J14  
ctg79□ctg1485□ctg1750□WAG-108L12  
ctg79□ctg1500□□WAG-57B22  
ctg79□ctg1500□□WAG-115G18  
ctg79□ctg1500□ctg1349□WAG-19L11  
ctg79□ctg1500□ctg1349□WAG-27L19  
ctg79□ctg1500□ctg1349□WAG-57D5  
ctg79□ctg1500□ctg1349□WAG-59O9  
ctg79□ctg1500□ctg1349□WAG-107C17  
ctg79□ctg1500□ctg1349□WAG-112C11  
ctg79□ctg1500□ctg1349□WAG-128E16  
ctg79□ctg1500□ctg6703□WAG-58E23  
ctg79□ctg1500□ctg6703□WAG-119D11  
ctg79□ctg6111□□WAG-75D13  
ctg79□ctg6111□□WAG-98K14  
ctg790□□□WAG-16K2  
ctg790□ctg1999□□WAG-16A9  
ctg790□ctg1999□□WAG-110E14  
ctg790□ctg1999□ctg3213□WAG-21B6  
ctg790□ctg1999□ctg3213□WAG-73F17  
ctg790□ctg1999□ctg3213□WAG-129B9  
ctg791□ctg1661□ctg1512□WAG-64M8  
ctg791□ctg1661□ctg1512□WAG-65H10  
ctg791□ctg1661□ctg1512□WAG-76C23  
ctg791□ctg1661□ctg1512□WAG-116P9  
ctg791□ctg1661□ctg1512□WAG-119O18  
ctg792□□□WAG-13H7  
ctg792□ctg2774□□WAG-24M18  
ctg792□ctg2774□□WAG-100I13  
ctg792□ctg2774□ctg2755□WAG-4C15  
ctg792□ctg2774□ctg2755□WAG-23D9  
ctg792□ctg2774□ctg2755□WAG-56I14  
ctg792□ctg2774□ctg2755□WAG-105C23  
ctg792□ctg2774□ctg2755□WAG-111I12  
ctg792□ctg2774□ctg3866□WAG-10A16  
ctg792□ctg2774□ctg3866□WAG-33F4  
ctg792□ctg2774□ctg3866□WAG-118D4  
ctg793□□□WAG-72C20  
ctg793□ctg2175□□WAG-13K3  
ctg793□ctg2175□ctg2657□WAG-60G21  
ctg793□ctg2175□ctg2657□WAG-103P4  
ctg793□ctg2175□ctg2657□WAG-128J2  
ctg793□ctg4613□ctg4785□WAG-21B2  
ctg793□ctg4613□ctg4785□WAG-33I10  
ctg794□ctg1664□ctg1946□WAG-10B22  
ctg794□ctg1664□ctg1946□WAG-21M7  
ctg794□ctg1664□ctg1946□WAG-44L11  
ctg794□ctg1664□ctg1946□WAG-63L3

ctg794□ctg1664□ctg1946□WAG-82A19  
ctg794□ctg1664□ctg1946□WAG-99D24  
ctg795□ctg1665□ctg1517□WAG-44A19  
ctg795□ctg1665□ctg1517□WAG-45B16  
ctg795□ctg1665□ctg1517□WAG-89A21  
ctg795□ctg1665□ctg1517□WAG-90E7  
ctg795□ctg1665□ctg1517□WAG-91B24  
ctg796□□□WAG-28O9  
ctg796□□□WAG-36K15  
ctg796□□□WAG-102G9  
ctg796□ctg2336□□WAG-103B22  
ctg796□ctg2336□ctg2899□WAG-19J23  
ctg796□ctg2336□ctg2899□WAG-19P13  
ctg796□ctg2336□ctg2899□WAG-26G20  
ctg796□ctg2336□ctg2899□WAG-116P2  
ctg797□ctg1955□□WAG-86D13  
ctg797□ctg1955□ctg2352□WAG-67L14  
ctg797□ctg1955□ctg2352□WAG-82O13  
ctg797□ctg1955□ctg2352□WAG-84B7  
ctg797□ctg1955□ctg2352□WAG-124H13  
ctg798□ctg1671□□WAG-25G24  
ctg798□ctg1671□ctg1939□WAG-26G11  
ctg798□ctg1671□ctg1939□WAG-67C12  
ctg798□ctg1671□ctg1939□WAG-120L23  
ctg799□□□WAG-54J13  
ctg799□□□WAG-60B5  
ctg799□ctg2429□□WAG-109E1  
ctg799□ctg2429□ctg3463□WAG-24C5  
ctg799□ctg2429□ctg3463□WAG-52P9  
ctg799□ctg2429□ctg3463□WAG-113L5  
ctg799□ctg2429□ctg3463□WAG-123C15  
ctg799□ctg2429□ctg4764□WAG-29I22  
ctg799□ctg2429□ctg4764□WAG-124K18  
ctg799□ctg2429□ctg5795□WAG-74B11  
ctg799□ctg2429□ctg5795□WAG-82F12  
ctg799□ctg5583□ctg6726□WAG-81B15  
ctg799□ctg5583□ctg6726□WAG-123L17  
ctg799□ctg6458□□WAG-50F8  
ctg799□ctg6458□□WAG-104I8  
ctg8□□□WAG-55D10  
ctg8□□□WAG-94G24  
ctg8□ctg305□□WAG-100B18  
ctg8□ctg305□ctg286□WAG-14G23  
ctg8□ctg305□ctg286□WAG-28D21  
ctg8□ctg305□ctg286□WAG-48G6  
ctg8□ctg305□ctg286□WAG-49M7  
ctg8□ctg305□ctg286□WAG-52F9  
ctg8□ctg305□ctg286□WAG-59O17  
ctg8□ctg305□ctg286□WAG-75P9  
ctg8□ctg305□ctg286□WAG-80H12  
ctg8□ctg305□ctg286□WAG-87K8  
ctg8□ctg305□ctg286□WAG-127F23  
ctg8□ctg305□ctg286□WAG-130N6  
ctg8□ctg32□ctg38□WAG-8I11  
ctg8□ctg32□ctg38□WAG-14H13  
ctg8□ctg32□ctg38□WAG-15O12

ctg8□ctg32□ctg38□WAG-16J7  
ctg8□ctg32□ctg38□WAG-18J3  
ctg8□ctg32□ctg38□WAG-20G15  
ctg8□ctg32□ctg38□WAG-29C22  
ctg8□ctg32□ctg38□WAG-51B11  
ctg8□ctg32□ctg38□WAG-56I15  
ctg8□ctg32□ctg38□WAG-59J22  
ctg8□ctg32□ctg38□WAG-60K21  
ctg8□ctg32□ctg38□WAG-62F16  
ctg8□ctg32□ctg38□WAG-71L4  
ctg8□ctg32□ctg38□WAG-72B15  
ctg8□ctg32□ctg38□WAG-81A20  
ctg8□ctg32□ctg38□WAG-81N6  
ctg8□ctg32□ctg38□WAG-87I14  
ctg8□ctg32□ctg38□WAG-87M23  
ctg8□ctg32□ctg38□WAG-96J16  
ctg8□ctg32□ctg38□WAG-98F13  
ctg8□ctg32□ctg38□WAG-99F19  
ctg8□ctg32□ctg38□WAG-106A11  
ctg8□ctg32□ctg38□WAG-120O22  
ctg8□ctg32□ctg38□WAG-128E20  
ctg80□□□WAG-37I22  
ctg80□ctg330□ctg324□WAG-4K14  
ctg80□ctg330□ctg324□WAG-20G10  
ctg80□ctg330□ctg324□WAG-25C20  
ctg80□ctg330□ctg324□WAG-28P1  
ctg80□ctg330□ctg324□WAG-46C3  
ctg80□ctg330□ctg324□WAG-56F8  
ctg80□ctg330□ctg324□WAG-90H15  
ctg80□ctg330□ctg324□WAG-108L3  
ctg80□ctg330□ctg324□WAG-118H4  
ctg80□ctg330□ctg324□WAG-121E19  
ctg800□ctg1675□ctg1843□WAG-33N2  
ctg800□ctg1675□ctg1843□WAG-34N16  
ctg800□ctg1675□ctg1843□WAG-99F22  
ctg800□ctg1675□ctg1843□WAG-103M12  
ctg801□□□WAG-65O24  
ctg801□ctg2028□□WAG-46H3  
ctg801□ctg2028□□WAG-55I8  
ctg801□ctg2028□□WAG-78M24  
ctg801□ctg2028□ctg1878□WAG-18A16  
ctg801□ctg2028□ctg1878□WAG-41G15  
ctg801□ctg2028□ctg1878□WAG-63J5  
ctg801□ctg2028□ctg1878□WAG-70A17  
ctg801□ctg2028□ctg1878□WAG-85A6  
ctg801□ctg2028□ctg1878□WAG-96D19  
ctg802□ctg1679□□WAG-40J18  
ctg802□ctg1679□ctg1533□WAG-32C15  
ctg802□ctg1679□ctg1533□WAG-32N1  
ctg802□ctg1679□ctg1533□WAG-88M17  
ctg803□□□WAG-10E24  
ctg803□□□WAG-77M6  
ctg803□ctg2870□□WAG-114C16  
ctg803□ctg2870□ctg3718□WAG-21L22  
ctg803□ctg2870□ctg3718□WAG-106P21  
ctg803□ctg2870□ctg3718□WAG-128I7

ctg803□ctg2953□□WAG-13E23  
ctg803□ctg2953□□WAG-29F8  
ctg803□ctg2953□□WAG-108C1  
ctg803□ctg2953□ctg4972□WAG-68E13  
ctg803□ctg2953□ctg4972□WAG-75H15  
ctg804□ctg2031□□WAG-62H10  
ctg804□ctg2031□ctg1887□WAG-46L9  
ctg804□ctg2031□ctg1887□WAG-65G19  
ctg804□ctg2031□ctg1887□WAG-94H1  
ctg804□ctg2031□ctg1887□WAG-106K14  
ctg805□□□WAG-9O24  
ctg805□ctg1684□□WAG-14I13  
ctg805□ctg1684□ctg2120□WAG-21M18  
ctg805□ctg1684□ctg2120□WAG-76F12  
ctg805□ctg1684□ctg2120□WAG-117L13  
ctg805□ctg1684□ctg2120□WAG-126D10  
ctg805□ctg1684□ctg2120□WAG-128J20  
ctg806□□□WAG-68O15  
ctg806□ctg1686□□WAG-3O10  
ctg806□ctg1686□□WAG-110M23  
ctg806□ctg1686□ctg2361□WAG-20H23  
ctg806□ctg1686□ctg2361□WAG-64N8  
ctg806□ctg1686□ctg2361□WAG-117L4  
ctg806□ctg1686□ctg2361□WAG-125B24  
ctg806□ctg6568□□WAG-61M24  
ctg806□ctg6568□□WAG-101L21  
ctg807□ctg1687□ctg1537□WAG-62A16  
ctg807□ctg1687□ctg1537□WAG-68I7  
ctg807□ctg1687□ctg1537□WAG-94C8  
ctg807□ctg1687□ctg1537□WAG-123I3  
ctg808□□□WAG-4J7  
ctg808□ctg2373□ctg2956□WAG-1B19  
ctg808□ctg2373□ctg2956□WAG-8M11  
ctg808□ctg2373□ctg2956□WAG-10B7  
ctg808□ctg2373□ctg2956□WAG-34H13  
ctg808□ctg2373□ctg2956□WAG-78G12  
ctg808□ctg2373□ctg2956□WAG-114C1  
ctg808□ctg2373□ctg2956□WAG-126C8  
ctg809□□□WAG-91B22  
ctg809□ctg2047□□WAG-21G19  
ctg809□ctg2047□□WAG-34B6  
ctg809□ctg2047□□WAG-98P13  
ctg809□ctg2047□□WAG-123D6  
ctg809□ctg2047□□WAG-124A5  
ctg809□ctg2047□ctg2481□WAG-51C19  
ctg809□ctg2047□ctg2481□WAG-56D1  
ctg809□ctg2047□ctg2481□WAG-116K2  
ctg809□ctg2047□ctg2481□WAG-129O24  
ctg809□ctg2047□ctg2668□WAG-5I9  
ctg809□ctg2047□ctg2668□WAG-111P9  
ctg809□ctg2047□ctg2668□WAG-125D1  
ctg81□□□WAG-6B17  
ctg81□ctg1827□□WAG-36P17  
ctg81□ctg1827□ctg1656□WAG-29G20  
ctg81□ctg1827□ctg1656□WAG-60J22  
ctg81□ctg1827□ctg1656□WAG-66F14

ctg81□ctg1827□ctg1656□WAG-69I15  
ctg81□ctg1827□ctg1656□WAG-97L13  
ctg81□ctg1827□ctg1656□WAG-101P3  
ctg81□ctg342□ctg342□WAG-8C3  
ctg81□ctg342□ctg342□WAG-13N6  
ctg81□ctg342□ctg342□WAG-25H3  
ctg81□ctg342□ctg342□WAG-50J6  
ctg81□ctg342□ctg342□WAG-51O8  
ctg81□ctg342□ctg342□WAG-52D16  
ctg81□ctg342□ctg342□WAG-61G20  
ctg81□ctg342□ctg342□WAG-69C18  
ctg81□ctg342□ctg342□WAG-72O17  
ctg81□ctg342□ctg342□WAG-74K12  
ctg81□ctg342□ctg342□WAG-88K7  
ctg81□ctg342□ctg342□WAG-92N5  
ctg81□ctg342□ctg342□WAG-106G4  
ctg81□ctg342□ctg342□WAG-112F21  
ctg81□ctg342□ctg342□WAG-119L2  
ctg81□ctg342□ctg342□WAG-128O15  
ctg81□ctg432□□WAG-24A15  
ctg81□ctg432□ctg384□WAG-31C3  
ctg81□ctg432□ctg384□WAG-43J12  
ctg81□ctg432□ctg384□WAG-56M13  
ctg81□ctg432□ctg384□WAG-71J4  
ctg81□ctg432□ctg384□WAG-93J23  
ctg81□ctg432□ctg384□WAG-96E16  
ctg81□ctg432□ctg384□WAG-117C17  
ctg810□ctg1977□ctg1825□WAG-7L4  
ctg810□ctg1977□ctg1825□WAG-50C18  
ctg810□ctg1977□ctg1825□WAG-69E7  
ctg810□ctg1977□ctg1825□WAG-112C2  
ctg810□ctg1977□ctg1825□WAG-112O20  
ctg811□□□WAG-124M19  
ctg811□ctg1979□□WAG-92O1  
ctg811□ctg1979□□WAG-126H23  
ctg811□ctg1979□ctg3329□WAG-27B7  
ctg811□ctg1979□ctg3329□WAG-31H16  
ctg811□ctg1979□ctg3329□WAG-56F10  
ctg811□ctg1979□ctg3329□WAG-92F3  
ctg811□ctg1979□ctg3329□WAG-122A22  
ctg811□ctg2049□□WAG-33A1  
ctg811□ctg2049□ctg2597□WAG-58E15  
ctg811□ctg2049□ctg2597□WAG-75E11  
ctg811□ctg2049□ctg2597□WAG-107M23  
ctg811□ctg4659□ctg4819□WAG-50K7  
ctg811□ctg4659□ctg4819□WAG-80N16  
ctg811□ctg5080□ctg5636□WAG-7D19  
ctg811□ctg5080□ctg5636□WAG-93B12  
ctg811□ctg5133□ctg5769□WAG-16H12  
ctg811□ctg5133□ctg5769□WAG-52K14  
ctg812□ctg1697□ctg1543□WAG-46E18  
ctg812□ctg1697□ctg1543□WAG-75C12  
ctg812□ctg1697□ctg1543□WAG-100F18  
ctg812□ctg1697□ctg1543□WAG-111B9  
ctg813□ctg1701□ctg1548□WAG-33O9  
ctg813□ctg1701□ctg1548□WAG-42D6

ctg813□ctg1701□ctg1548□WAG-101B4  
ctg813□ctg1701□ctg1548□WAG-101P10  
ctg814□ctg1705□□WAG-2O2  
ctg814□ctg1705□□WAG-22G18  
ctg814□ctg1705□□WAG-53N2  
ctg814□ctg1705□ctg2693□WAG-29P2  
ctg814□ctg1705□ctg2693□WAG-52D21  
ctg814□ctg1705□ctg2693□WAG-54B19  
ctg814□ctg1705□ctg2693□WAG-67E2  
ctg815□□□WAG-54B10  
ctg815□ctg1998□ctg1844□WAG-9A18  
ctg815□ctg1998□ctg1844□WAG-15L22  
ctg815□ctg1998□ctg1844□WAG-64L11  
ctg816□□□WAG-121M11  
ctg816□ctg1880□ctg1916□WAG-54E18  
ctg816□ctg1880□ctg1916□WAG-74F14  
ctg816□ctg1880□ctg1916□WAG-83G3  
ctg816□ctg1880□ctg1916□WAG-91K15  
ctg816□ctg1880□ctg1916□WAG-113K4  
ctg817□ctg2065□□WAG-101A24  
ctg817□ctg2065□ctg3199□WAG-13D24  
ctg817□ctg2065□ctg3199□WAG-57G10  
ctg817□ctg2065□ctg3199□WAG-96H1  
ctg817□ctg2065□ctg3199□WAG-125G14  
ctg817□ctg2065□ctg3199□WAG-130G13  
ctg818□ctg1966□□WAG-1I13  
ctg818□ctg1966□ctg1853□WAG-8C12  
ctg818□ctg1966□ctg1853□WAG-20F11  
ctg818□ctg1966□ctg1853□WAG-107H9  
ctg818□ctg1966□ctg1853□WAG-113M2  
ctg818□ctg2945□□WAG-71G8  
ctg818□ctg2945□ctg2920□WAG-40L23  
ctg818□ctg2945□ctg2920□WAG-89G20  
ctg818□ctg2945□ctg2920□WAG-91H21  
ctg819□ctg1717□□WAG-71O24  
ctg819□ctg1717□□WAG-123C7  
ctg819□ctg1717□ctg1928□WAG-42H7  
ctg819□ctg1717□ctg1928□WAG-79H5  
ctg819□ctg1717□ctg1928□WAG-98J2  
ctg819□ctg1717□ctg1928□WAG-101G19  
ctg819□ctg1717□ctg1928□WAG-126P8  
ctg82□□□WAG-51N15  
ctg82□□□WAG-99G4  
ctg82□ctg334□□WAG-31N2  
ctg82□ctg334□ctg409□WAG-48G19  
ctg82□ctg334□ctg409□WAG-85L9  
ctg82□ctg334□ctg409□WAG-98B7  
ctg82□ctg334□ctg409□WAG-101B14  
ctg82□ctg334□ctg409□WAG-111A5  
ctg82□ctg334□ctg409□WAG-111O19  
ctg82□ctg334□ctg409□WAG-129J17  
ctg82□ctg334□ctg409□WAG-130H9  
ctg82□ctg334□ctg5497□WAG-28C10  
ctg82□ctg334□ctg5497□WAG-108L21  
ctg820□ctg2413□□WAG-82A20  
ctg820□ctg2413□ctg2313□WAG-67E8

ctg820□ctg2413□ctg2313□WAG-87K7  
ctg820□ctg2413□ctg2313□WAG-95G14  
ctg820□ctg2413□ctg2313□WAG-96K19  
ctg820□ctg2413□ctg2313□WAG-129N19  
ctg821□ctg1719□ctg1562□WAG-42F12  
ctg821□ctg1719□ctg1562□WAG-111D13  
ctg821□ctg1719□ctg1562□WAG-125C18  
ctg821□ctg1719□ctg1562□WAG-127A24  
ctg822□□□WAG-104M22  
ctg822□ctg1724□ctg2097□WAG-19A9  
ctg822□ctg1724□ctg2097□WAG-24O1  
ctg822□ctg1724□ctg2097□WAG-38C3  
ctg822□ctg1724□ctg2097□WAG-63B23  
ctg822□ctg1724□ctg2097□WAG-95G19  
ctg823□ctg1728□□□WAG-6D13  
ctg823□ctg1728□□□WAG-8D22  
ctg823□ctg1728□□□WAG-58J7  
ctg823□ctg1728□□□WAG-69C2  
ctg823□ctg1728□ctg2830□WAG-38F18  
ctg823□ctg1728□ctg2830□WAG-47N10  
ctg823□ctg1728□ctg2830□WAG-108N11  
ctg824□ctg1734□□□WAG-56N22  
ctg824□ctg1734□□□WAG-80D22  
ctg824□ctg1734□ctg2036□WAG-15P2  
ctg824□ctg1734□ctg2036□WAG-18A23  
ctg824□ctg1734□ctg2036□WAG-68M23  
ctg824□ctg1734□ctg2036□WAG-127F9  
ctg824□ctg1734□ctg2036□WAG-128I9  
ctg824□ctg1734□ctg2036□WAG-129H1  
ctg824□ctg5378□ctg6336□WAG-1M7  
ctg824□ctg5378□ctg6336□WAG-42C3  
ctg825□□□WAG-61K22  
ctg825□ctg1871□□□WAG-32A15  
ctg825□ctg1871□□□WAG-62B8  
ctg825□ctg1871□□□WAG-116L17  
ctg825□ctg1871□ctg1704□WAG-13K5  
ctg825□ctg1871□ctg1704□WAG-15C15  
ctg825□ctg1871□ctg1704□WAG-47K10  
ctg825□ctg1871□ctg1704□WAG-68B17  
ctg825□ctg1871□ctg1704□WAG-123C5  
ctg825□ctg1871□ctg1704□WAG-130E16  
ctg826□ctg1739□ctg2651□WAG-11C10  
ctg826□ctg1739□ctg2651□WAG-84A24  
ctg826□ctg1739□ctg2651□WAG-126N18  
ctg826□ctg1739□ctg5958□WAG-12B15  
ctg826□ctg1739□ctg5958□WAG-95L8  
ctg827□ctg2360□ctg2259□WAG-44M21  
ctg827□ctg2360□ctg2259□WAG-83N8  
ctg827□ctg2360□ctg2259□WAG-115B21  
ctg827□ctg2360□ctg2259□WAG-130M24  
ctg827□ctg6169□□□WAG-25M22  
ctg827□ctg6169□□□WAG-99D1  
ctg828□□□WAG-27D6  
ctg828□□□WAG-78B8  
ctg828□ctg1743□□□WAG-53K10  
ctg828□ctg1743□ctg2751□WAG-25N17



ctg828□ctg1743□ctg2751□WAG-72E7  
ctg828□ctg1743□ctg2751□WAG-73P23  
ctg828□ctg1743□ctg2751□WAG-84B9  
ctg828□ctg1743□ctg2751□WAG-84O15  
ctg829□ctg2099□□WAG-46N23  
ctg829□ctg2099□ctg2564□WAG-67C9  
ctg829□ctg2099□ctg2564□WAG-67O17  
ctg829□ctg2099□ctg2564□WAG-82D5  
ctg829□ctg2099□ctg2564□WAG-120H23  
ctg83□ctg391□□WAG-123O20  
ctg83□ctg391□ctg299□WAG-19F2  
ctg83□ctg391□ctg299□WAG-34C6  
ctg83□ctg391□ctg299□WAG-68D14  
ctg83□ctg391□ctg299□WAG-99K13  
ctg83□ctg391□ctg299□WAG-124P3  
ctg83□ctg391□ctg5714□WAG-35C15  
ctg83□ctg391□ctg5714□WAG-92D20  
ctg830□□□WAG-35B8  
ctg830□□□WAG-106B19  
ctg830□ctg2580□ctg2542□WAG-8O22  
ctg830□ctg2580□ctg2542□WAG-76F9  
ctg830□ctg2580□ctg2542□WAG-97G5  
ctg830□ctg2580□ctg2542□WAG-114F5  
ctg831□ctg1748□ctg1589□WAG-24B12  
ctg831□ctg1748□ctg1589□WAG-51F13  
ctg831□ctg1748□ctg1589□WAG-61D10  
ctg831□ctg1748□ctg1589□WAG-64I8  
ctg831□ctg1748□ctg1589□WAG-70I4  
ctg832□ctg1750□ctg1591□WAG-47A7  
ctg832□ctg1750□ctg1591□WAG-93B24  
ctg832□ctg1750□ctg1591□WAG-110E2  
ctg832□ctg1750□ctg1591□WAG-112F13  
ctg833□□□WAG-21K8  
ctg833□□□WAG-89L14  
ctg833□ctg1754□□WAG-58D17  
ctg833□ctg1754□□WAG-102H4  
ctg833□ctg1754□□WAG-122O16  
ctg833□ctg1754□ctg2141□WAG-102E1  
ctg833□ctg1754□ctg2141□WAG-111D19  
ctg833□ctg1754□ctg2141□WAG-122M15  
ctg833□ctg1754□ctg2141□WAG-124A21  
ctg833□ctg1754□ctg4279□WAG-12E7  
ctg833□ctg1754□ctg4279□WAG-67J1  
ctg833□ctg1754□ctg4279□WAG-78E7  
ctg833□ctg1754□ctg4572□WAG-41B10  
ctg833□ctg1754□ctg4572□WAG-56L13  
ctg834□ctg1755□ctg1865□WAG-17K7  
ctg834□ctg1755□ctg1865□WAG-30K1  
ctg834□ctg1755□ctg1865□WAG-69G21  
ctg834□ctg1755□ctg1865□WAG-77A18  
ctg834□ctg1755□ctg1865□WAG-123J6  
ctg835□□□WAG-O2  
ctg835□ctg2624□□WAG-44K7  
ctg835□ctg2624□□WAG-98C6  
ctg835□ctg2624□□WAG-114L10  
ctg835□ctg2624□ctg2762□WAG-23D7

ctg835□ctg2624□ctg2762□WAG-39N12  
ctg835□ctg2624□ctg2762□WAG-70L10  
ctg835□ctg2624□ctg2762□WAG-75A14  
ctg835□ctg2624□ctg5998□WAG-18E21  
ctg835□ctg2624□ctg5998□WAG-118F12  
ctg836□ctg1760□ctg1596□WAG-4O19  
ctg836□ctg1760□ctg1596□WAG-29D12  
ctg836□ctg1760□ctg1596□WAG-64P18  
ctg836□ctg1760□ctg1596□WAG-105A24  
ctg836□ctg1760□ctg1596□WAG-119O13  
ctg836□ctg4397□□WAG-21D13  
ctg836□ctg4397□□WAG-51H9  
ctg836□ctg4397□□WAG-61E9  
ctg837□ctg2392□ctg3426□WAG-30K17  
ctg837□ctg2392□ctg3426□WAG-54K23  
ctg837□ctg2392□ctg3426□WAG-55F22  
ctg837□ctg2392□ctg3426□WAG-95F8  
ctg837□ctg2392□ctg4355□WAG-25D13  
ctg837□ctg2392□ctg4355□WAG-94A5  
ctg837□ctg2392□ctg4355□WAG-96D23  
ctg838□ctg2380□ctg2976□WAG-44J22  
ctg838□ctg2380□ctg2976□WAG-57P16  
ctg838□ctg2380□ctg2976□WAG-62G7  
ctg838□ctg2380□ctg2976□WAG-102L20  
ctg838□ctg2380□ctg5447□WAG-9K1  
ctg838□ctg2380□ctg5447□WAG-91K21  
ctg839□□□WAG-36E10  
ctg839□□□WAG-87D12  
ctg839□ctg2052□□WAG-5J22  
ctg839□ctg2052□□WAG-34E1  
ctg839□ctg2052□ctg3075□WAG-15F18  
ctg839□ctg2052□ctg3075□WAG-43O13  
ctg839□ctg2052□ctg3075□WAG-125J16  
ctg84□ctg326□□WAG-60M12  
ctg84□ctg326□□WAG-113I2  
ctg84□ctg326□ctg1554□WAG-9O18  
ctg84□ctg326□ctg1554□WAG-43K9  
ctg84□ctg326□ctg1554□WAG-47O23  
ctg84□ctg326□ctg1554□WAG-58P3  
ctg84□ctg326□ctg1554□WAG-100G10  
ctg84□ctg326□ctg1554□WAG-113H15  
ctg84□ctg326□ctg426□WAG-23G16  
ctg84□ctg326□ctg426□WAG-66K1  
ctg84□ctg326□ctg426□WAG-68G10  
ctg84□ctg326□ctg426□WAG-77K10  
ctg84□ctg326□ctg426□WAG-87B3  
ctg84□ctg326□ctg426□WAG-87P4  
ctg84□ctg326□ctg426□WAG-88L24  
ctg84□ctg326□ctg426□WAG-112B14  
ctg840□ctg1763□□WAG-47G16  
ctg840□ctg1763□ctg2891□WAG-6O15  
ctg840□ctg1763□ctg2891□WAG-82F7  
ctg840□ctg1763□ctg2891□WAG-107E11  
ctg840□ctg1763□ctg4564□WAG-48H1  
ctg840□ctg1763□ctg4564□WAG-56O16  
ctg841□□□WAG-33M6

ctg841□ctg2401□□WAG-100H16  
ctg841□ctg2401□ctg3913□WAG-33H15  
ctg841□ctg2401□ctg3913□WAG-67M8  
ctg841□ctg2401□ctg3913□WAG-92M11  
ctg841□ctg2401□ctg3913□WAG-115N5  
ctg841□ctg2401□ctg6599□WAG-54C19  
ctg841□ctg2401□ctg6599□WAG-114B22  
ctg841□ctg3337□□WAG-114K17  
ctg841□ctg3337□ctg4524□WAG-78F1  
ctg841□ctg3337□ctg4524□WAG-103F16  
ctg842□ctg3364□□WAG-1P6  
ctg842□ctg3364□□WAG-26N6  
ctg842□ctg3364□□WAG-58L16  
ctg842□ctg3364□□WAG-111B19  
ctg842□ctg3364□ctg4288□WAG-38F10  
ctg842□ctg3364□ctg4288□WAG-44P5  
ctg842□ctg3364□ctg4288□WAG-92B19  
ctg842□ctg3364□ctg6739□WAG-23J21  
ctg842□ctg3364□ctg6739□WAG-83O2  
ctg842□ctg5161□ctg5846□WAG-92E20  
ctg842□ctg5161□ctg5846□WAG-110J12  
ctg842□ctg6376□□WAG-5G6  
ctg842□ctg6376□□WAG-115E4  
ctg843□□□WAG-19A18  
ctg843□□□WAG-27H1  
ctg843□□□WAG-59N4  
ctg843□□□WAG-81A8  
ctg843□ctg2126□ctg2700□WAG-43E4  
ctg843□ctg2126□ctg2700□WAG-54P6  
ctg843□ctg2126□ctg2700□WAG-87B2  
ctg843□ctg2126□ctg2700□WAG-112G8  
ctg843□ctg2126□ctg4327□WAG-22K10  
ctg843□ctg2126□ctg4327□WAG-43G12  
ctg844□ctg1768□□WAG-24A18  
ctg844□ctg1768□ctg2073□WAG-12K21  
ctg844□ctg1768□ctg2073□WAG-22O14  
ctg844□ctg1768□ctg2073□WAG-58I20  
ctg844□ctg1768□ctg2073□WAG-97M11  
ctg844□ctg3283□ctg3335□WAG-36K3  
ctg844□ctg3283□ctg3335□WAG-43K16  
ctg844□ctg3283□ctg3335□WAG-128G20  
ctg844□ctg6150□□WAG-28O6  
ctg844□ctg6150□□WAG-64B8  
ctg845□□□WAG-105L3  
ctg845□ctg2867□□WAG-63O17  
ctg845□ctg2867□ctg2858□WAG-44A7  
ctg845□ctg2867□ctg2858□WAG-50H21  
ctg845□ctg2867□ctg2858□WAG-56P6  
ctg845□ctg2867□ctg2858□WAG-73P16  
ctg845□ctg2867□ctg2858□WAG-116I4  
ctg846□□□WAG-129D11  
ctg846□ctg4080□□WAG-47K7  
ctg846□ctg4080□□WAG-102B4  
ctg846□ctg4080□□WAG-109G10  
ctg846□ctg4080□ctg6130□WAG-1N3  
ctg846□ctg4080□ctg6130□WAG-67C10

ctg846□ctg5245□ctg6037□WAG-32K6  
ctg846□ctg5245□ctg6037□WAG-109P7  
ctg847□ctg1773□ctg2164□WAG-69E22  
ctg847□ctg1773□ctg2164□WAG-90K17  
ctg847□ctg1773□ctg2164□WAG-92F22  
ctg847□ctg1773□ctg2164□WAG-115B19  
ctg847□ctg1773□ctg2164□WAG-128J12  
ctg848□ctg1924□□WAG-77K23  
ctg848□ctg1924□ctg3210□WAG-44D21  
ctg848□ctg1924□ctg3210□WAG-109C15  
ctg848□ctg1924□ctg3210□WAG-130A15  
ctg848□ctg1924□ctg4073□WAG-43N13  
ctg848□ctg1924□ctg4073□WAG-46B19  
ctg848□ctg1924□ctg4592□WAG-32K14  
ctg848□ctg1924□ctg4592□WAG-121C3  
ctg848□ctg3511□ctg3639□WAG-6P21  
ctg848□ctg3511□ctg3639□WAG-87A20  
ctg848□ctg3511□ctg3639□WAG-87F1  
ctg848□ctg3511□ctg3639□WAG-130M18  
ctg849□ctg1774□ctg2008□WAG-11H1  
ctg849□ctg1774□ctg2008□WAG-26I14  
ctg849□ctg1774□ctg2008□WAG-38A11  
ctg849□ctg1774□ctg2008□WAG-62B7  
ctg849□ctg1774□ctg2008□WAG-77E17  
ctg849□ctg1774□ctg2008□WAG-107E3  
ctg849□ctg1774□ctg2008□WAG-124N6  
ctg85□□□WAG-43P6  
ctg85□□□WAG-78P24  
ctg85□□□WAG-85H1  
ctg85□□□WAG-115B2  
ctg85□ctg1159□ctg1337□WAG-13I17  
ctg85□ctg1159□ctg1337□WAG-51M3  
ctg85□ctg1159□ctg1337□WAG-52H9  
ctg85□ctg1159□ctg1337□WAG-56G24  
ctg85□ctg1159□ctg1337□WAG-78O22  
ctg85□ctg1159□ctg1337□WAG-104O7  
ctg85□ctg1159□ctg1337□WAG-111K13  
ctg85□ctg1892□□WAG-4P11  
ctg85□ctg1892□□WAG-15O24  
ctg85□ctg1892□□WAG-56M20  
ctg85□ctg1892□ctg1725□WAG-23N19  
ctg85□ctg1892□ctg1725□WAG-35H4  
ctg85□ctg1892□ctg1725□WAG-76C10  
ctg85□ctg1892□ctg1725□WAG-104M17  
ctg85□ctg1892□ctg1725□WAG-126G1  
ctg85□ctg1892□ctg1725□WAG-130G6  
ctg85□ctg1892□ctg2639□WAG-9E14  
ctg85□ctg1892□ctg2639□WAG-84F20  
ctg85□ctg1892□ctg2639□WAG-97P6  
ctg85□ctg1892□ctg2639□WAG-126K19  
ctg85□ctg1982□□WAG-27N11  
ctg85□ctg1982□□WAG-55N19  
ctg85□ctg1982□ctg2386□WAG-83P21  
ctg85□ctg1982□ctg2386□WAG-89J16  
ctg85□ctg1982□ctg2386□WAG-113L8  
ctg85□ctg1982□ctg2386□WAG-123F3

ctg85□ctg1982□ctg2386□WAG-127C23  
ctg85□ctg1982□ctg2386□WAG-127E11  
ctg85□ctg1982□ctg5019□WAG-37A15  
ctg85□ctg1982□ctg5019□WAG-104I14  
ctg85□ctg5793□□WAG-84C18  
ctg85□ctg5793□□WAG-108L18  
ctg850□ctg1778□□WAG-49K10  
ctg850□ctg1778□ctg2169□WAG-47D9  
ctg850□ctg1778□ctg2169□WAG-62F24  
ctg850□ctg1778□ctg2169□WAG-90H9  
ctg850□ctg1778□ctg2169□WAG-90K13  
ctg851□ctg1782□□WAG-14O10  
ctg851□ctg1782□□WAG-19P24  
ctg851□ctg1782□ctg3483□WAG-30J18  
ctg851□ctg1782□ctg3483□WAG-43H11  
ctg851□ctg1782□ctg3483□WAG-66J22  
ctg851□ctg1782□ctg3483□WAG-113O3  
ctg851□ctg1782□ctg3483□WAG-120I9  
ctg852□ctg1783□□WAG-119B15  
ctg852□ctg1783□ctg2171□WAG-70L12  
ctg852□ctg1783□ctg2171□WAG-71F18  
ctg852□ctg1783□ctg2171□WAG-71K23  
ctg852□ctg1783□ctg2171□WAG-112P16  
ctg853□□□WAG-90O6  
ctg853□ctg2577□□WAG-22D24  
ctg853□ctg2577□□WAG-103G22  
ctg853□ctg2577□ctg3381□WAG-54N9  
ctg853□ctg2577□ctg3381□WAG-90P6  
ctg853□ctg2577□ctg3381□WAG-105L6  
ctg853□ctg2577□ctg4016□WAG-24C14  
ctg853□ctg2577□ctg4016□WAG-72C1  
ctg854□ctg2443□□WAG-20C8  
ctg854□ctg2443□□WAG-23J4  
ctg854□ctg2443□□WAG-45L17  
ctg854□ctg2443□□WAG-83F22  
ctg854□ctg2443□ctg2439□WAG-10H18  
ctg854□ctg2443□ctg2439□WAG-35A15  
ctg854□ctg2443□ctg2439□WAG-41A7  
ctg854□ctg2443□ctg2439□WAG-81H6  
ctg854□ctg2443□ctg2439□WAG-86K4  
ctg854□ctg2443□ctg2439□WAG-98M14  
ctg854□ctg2443□ctg3577□WAG-24C7  
ctg854□ctg2443□ctg3577□WAG-45O4  
ctg854□ctg2443□ctg3577□WAG-75O18  
ctg855□ctg1786□□WAG-18L21  
ctg855□ctg1786□ctg2175□WAG-19J12  
ctg855□ctg1786□ctg2175□WAG-72A8  
ctg855□ctg1786□ctg2175□WAG-103K13  
ctg855□ctg1786□ctg2175□WAG-109K11  
ctg856□ctg2141□□WAG-47J1  
ctg856□ctg2141□□WAG-63J8  
ctg856□ctg2141□ctg2631□WAG-69M12  
ctg856□ctg2141□ctg2631□WAG-87M2  
ctg856□ctg2141□ctg2631□WAG-90G15  
ctg856□ctg2141□ctg2631□WAG-97A7  
ctg856□ctg5736□□WAG-16I11

ctg856□ctg5736□□WAG-53B4  
ctg857□ctg1790□□WAG-17D18  
ctg857□ctg1790□ctg2543□WAG-5N16  
ctg857□ctg1790□ctg2543□WAG-55B5  
ctg857□ctg1790□ctg2543□WAG-74A23  
ctg857□ctg1790□ctg2543□WAG-89I3  
ctg857□ctg1790□ctg2543□WAG-120M16  
ctg858□□□WAG-117A12  
ctg858□ctg2087□□WAG-37D1  
ctg858□ctg2087□ctg2561□WAG-50H9  
ctg858□ctg2087□ctg2561□WAG-51B1  
ctg858□ctg2087□ctg2561□WAG-112O24  
ctg859□□□WAG-93C16  
ctg859□ctg2090□ctg1949□WAG-21K5  
ctg859□ctg2090□ctg1949□WAG-52M19  
ctg859□ctg2090□ctg1949□WAG-64K4  
ctg859□ctg2090□ctg1949□WAG-79B11  
ctg86□ctg1293□□WAG-111M20  
ctg86□ctg1293□ctg2009□WAG-20K21  
ctg86□ctg1293□ctg2009□WAG-33J13  
ctg86□ctg1293□ctg2009□WAG-38K15  
ctg86□ctg1293□ctg2009□WAG-100I4  
ctg86□ctg1293□ctg4514□WAG-98H11  
ctg86□ctg1293□ctg4514□WAG-129B11  
ctg86□ctg464□ctg474□WAG-17I17  
ctg86□ctg464□ctg474□WAG-28E4  
ctg86□ctg464□ctg474□WAG-30A8  
ctg86□ctg464□ctg474□WAG-30G19  
ctg86□ctg464□ctg474□WAG-38P22  
ctg86□ctg464□ctg474□WAG-74F7  
ctg86□ctg464□ctg474□WAG-83O22  
ctg86□ctg464□ctg474□WAG-84M21  
ctg86□ctg464□ctg474□WAG-125F4  
ctg86□ctg464□ctg777□WAG-1G15  
ctg86□ctg464□ctg777□WAG-4J15  
ctg86□ctg464□ctg777□WAG-9G16  
ctg86□ctg464□ctg777□WAG-15N2  
ctg86□ctg464□ctg777□WAG-46E4  
ctg86□ctg464□ctg777□WAG-50H2  
ctg86□ctg464□ctg777□WAG-64E15  
ctg86□ctg464□ctg777□WAG-80O23  
ctg860□ctg2158□□WAG-32K9  
ctg860□ctg2158□□WAG-97B4  
ctg860□ctg2158□□WAG-117N15  
ctg860□ctg2158□ctg3536□WAG-10J16  
ctg860□ctg2158□ctg3536□WAG-48L12  
ctg861□ctg2091□ctg2659□WAG-10K16  
ctg861□ctg2091□ctg2659□WAG-42L2  
ctg861□ctg2091□ctg2659□WAG-58B18  
ctg861□ctg2091□ctg2659□WAG-98H1  
ctg861□ctg2091□ctg2659□WAG-115C16  
ctg861□ctg6535□□WAG-20C1  
ctg861□ctg6535□□WAG-72P16  
ctg862□ctg2447□□WAG-90F9  
ctg862□ctg2447□ctg3169□WAG-25I14  
ctg862□ctg2447□ctg3169□WAG-101G14

ctg862□ctg2447□ctg3169□WAG-124B10  
ctg862□ctg2447□ctg3169□WAG-129N16  
ctg862□ctg4356□ctg4530□WAG-112N5  
ctg862□ctg4356□ctg4530□WAG-126H3  
ctg862□ctg6156□□WAG-11H17  
ctg862□ctg6156□□WAG-60P12  
ctg863□ctg1795□ctg1627□WAG-8C15  
ctg863□ctg1795□ctg1627□WAG-24M7  
ctg863□ctg1795□ctg1627□WAG-29O9  
ctg863□ctg1795□ctg1627□WAG-34L11  
ctg863□ctg1795□ctg1627□WAG-43I6  
ctg864□ctg2177□□WAG-3M11  
ctg864□ctg2177□□WAG-113P6  
ctg864□ctg2177□ctg2658□WAG-4M1  
ctg864□ctg2177□ctg2658□WAG-55E12  
ctg864□ctg2177□ctg2658□WAG-94H23  
ctg864□ctg2177□ctg2658□WAG-111D8  
ctg864□ctg2177□ctg2658□WAG-120I16  
ctg865□ctg1802□□WAG-19A16  
ctg865□ctg1802□□WAG-29D8  
ctg865□ctg1802□ctg2213□WAG-53G14  
ctg865□ctg1802□ctg2213□WAG-83P23  
ctg865□ctg1802□ctg2213□WAG-97I5  
ctg865□ctg1802□ctg2213□WAG-99M17  
ctg866□ctg1805□ctg1630□WAG-3B7  
ctg866□ctg1805□ctg1630□WAG-3E4  
ctg866□ctg1805□ctg1630□WAG-91F8  
ctg867□ctg1806□ctg1631□WAG-53E19  
ctg867□ctg1806□ctg1631□WAG-68L18  
ctg867□ctg1806□ctg1631□WAG-73L9  
ctg867□ctg1806□ctg1631□WAG-129D7  
ctg868□ctg2974□□WAG-87N5  
ctg868□ctg2974□□WAG-94F1  
ctg868□ctg2974□ctg3873□WAG-74I20  
ctg868□ctg2974□ctg3873□WAG-79N2  
ctg868□ctg2974□ctg3873□WAG-91K16  
ctg868□ctg2974□ctg3873□WAG-106A9  
ctg868□ctg2974□ctg3873□WAG-118K23  
ctg869□ctg1809□ctg2132□WAG-23E23  
ctg869□ctg1809□ctg2132□WAG-29N13  
ctg869□ctg1809□ctg2132□WAG-45N10  
ctg869□ctg1809□ctg2132□WAG-77F22  
ctg869□ctg1809□ctg2132□WAG-85H12  
ctg87□□□WAG-7E1  
ctg87□□□WAG-35G21  
ctg87□□□WAG-52N2  
ctg87□□□WAG-54D7  
ctg87□□□WAG-98H13  
ctg87□ctg2332□ctg2232□WAG-17O22  
ctg87□ctg2332□ctg2232□WAG-66B3  
ctg87□ctg2332□ctg2232□WAG-92J12  
ctg87□ctg2332□ctg2232□WAG-117C16  
ctg87□ctg3534□□WAG-62D12  
ctg87□ctg3534□□WAG-111E6  
ctg87□ctg3534□ctg4606□WAG-73K20  
ctg87□ctg3534□ctg4606□WAG-76P9

ctg870□ctg1812□ctg1637□WAG-13C22  
ctg870□ctg1812□ctg1637□WAG-16K15  
ctg870□ctg1812□ctg1637□WAG-111B24  
ctg870□ctg1812□ctg1637□WAG-123O1  
ctg871□ctg2115□□WAG-47I4  
ctg871□ctg2115□□WAG-66I6  
ctg871□ctg2115□□WAG-117N3  
ctg871□ctg2115□ctg3418□WAG-17H13  
ctg871□ctg2115□ctg3418□WAG-42C17  
ctg871□ctg2115□ctg3418□WAG-104J1  
ctg871□ctg4695□□WAG-12F8  
ctg871□ctg4695□□WAG-34D3  
ctg871□ctg4695□□WAG-56B3  
ctg871□ctg4695□□WAG-89M3  
ctg872□□□WAG-24M17  
ctg872□ctg2059□ctg1919□WAG-5K24  
ctg872□ctg2059□ctg1919□WAG-53E13  
ctg872□ctg2059□ctg1919□WAG-78H16  
ctg872□ctg4260□□WAG-66P16  
ctg872□ctg4260□ctg6707□WAG-36D16  
ctg872□ctg4260□ctg6707□WAG-48A13  
ctg873□ctg2117□□WAG-50L12  
ctg873□ctg2117□□WAG-59A17  
ctg873□ctg2117□□WAG-92K5  
ctg873□ctg2117□ctg3307□WAG-72B2  
ctg873□ctg2117□ctg3307□WAG-82A3  
ctg873□ctg2117□ctg3307□WAG-130M13  
ctg873□ctg2117□ctg5537□WAG-1F21  
ctg873□ctg2117□ctg5537□WAG-119G3  
ctg874□ctg1816□ctg1645□WAG-13L8  
ctg874□ctg1816□ctg1645□WAG-67I21  
ctg874□ctg1816□ctg1645□WAG-79I12  
ctg874□ctg1816□ctg1645□WAG-82B19  
ctg874□ctg1816□ctg1645□WAG-121M9  
ctg875□ctg2196□□WAG-102J8  
ctg875□ctg2196□ctg2686□WAG-10A21  
ctg875□ctg2196□ctg2686□WAG-101M11  
ctg875□ctg2196□ctg2686□WAG-124M1  
ctg875□ctg5540□□WAG-66O1  
ctg875□ctg5540□□WAG-106P10  
ctg876□□□WAG-66L1  
ctg876□ctg2128□ctg1997□WAG-45P9  
ctg876□ctg2128□ctg1997□WAG-50I4  
ctg876□ctg2128□ctg1997□WAG-107F6  
ctg876□ctg2128□ctg1997□WAG-115P13  
ctg877□ctg2129□ctg1999□WAG-11C9  
ctg877□ctg2129□ctg1999□WAG-21C2  
ctg877□ctg2129□ctg1999□WAG-24K3  
ctg877□ctg2129□ctg1999□WAG-102C8  
ctg878□□□WAG-53O6  
ctg878□□□WAG-87A11  
ctg878□□□WAG-87H21  
ctg878□ctg2646□□WAG-59M10  
ctg878□ctg2646□ctg2609□WAG-14L5  
ctg878□ctg2646□ctg2609□WAG-46J9  
ctg878□ctg2646□ctg2609□WAG-103O16



ctg878□ctg5042□ctg5555□WAG-56N21  
ctg878□ctg5042□ctg5555□WAG-99F14  
ctg878□ctg6159□□WAG-81H3  
ctg878□ctg6159□□WAG-128L2  
ctg879□ctg2446□ctg2357□WAG-21D7  
ctg879□ctg2446□ctg2357□WAG-44J19  
ctg879□ctg2446□ctg2357□WAG-57A4  
ctg879□ctg2446□ctg2357□WAG-84M24  
ctg879□ctg2446□ctg2357□WAG-121C24  
ctg879□ctg5894□□WAG-31B10  
ctg879□ctg5894□□WAG-110N12  
ctg88□ctg350□ctg353□WAG-28K22  
ctg88□ctg350□ctg353□WAG-31A22  
ctg88□ctg350□ctg353□WAG-31O16  
ctg88□ctg350□ctg353□WAG-38P4  
ctg88□ctg350□ctg353□WAG-39K10  
ctg88□ctg350□ctg353□WAG-61L1  
ctg88□ctg350□ctg353□WAG-86D21  
ctg88□ctg350□ctg353□WAG-107B17  
ctg88□ctg350□ctg353□WAG-120K12  
ctg88□ctg350□ctg353□WAG-123G3  
ctg88□ctg4465□□WAG-108P24  
ctg88□ctg4465□ctg6841□WAG-58O2  
ctg88□ctg4465□ctg6841□WAG-83A23  
ctg880□ctg2137□ctg2233□WAG-19C1  
ctg880□ctg2137□ctg2233□WAG-68L9  
ctg880□ctg2137□ctg2233□WAG-80L23  
ctg880□ctg2137□ctg2233□WAG-128K9  
ctg880□ctg2137□ctg3349□WAG-5H3  
ctg880□ctg2137□ctg3349□WAG-62I7  
ctg880□ctg2137□ctg3349□WAG-66D14  
ctg880□ctg2137□ctg3349□WAG-97L16  
ctg881□ctg1838□□WAG-108I23  
ctg881□ctg1838□ctg2241□WAG-5D21  
ctg881□ctg1838□ctg2241□WAG-58P1  
ctg881□ctg1838□ctg2241□WAG-81N8  
ctg881□ctg1838□ctg2241□WAG-126N16  
ctg882□□□WAG-64M6  
ctg882□ctg1839□ctg2162□WAG-21P9  
ctg882□ctg1839□ctg2162□WAG-45L22  
ctg882□ctg1839□ctg2162□WAG-57C16  
ctg882□ctg1839□ctg2162□WAG-109G11  
ctg882□ctg1839□ctg2162□WAG-110A13  
ctg882□ctg1839□ctg5472□WAG-20B16  
ctg882□ctg1839□ctg5472□WAG-100I17  
ctg882□ctg4523□□WAG-60A20  
ctg882□ctg4523□□WAG-61M13  
ctg882□ctg4523□□WAG-67M16  
ctg882□ctg4679□□WAG-15D11  
ctg882□ctg4679□□WAG-18D23  
ctg882□ctg4679□□WAG-22G14  
ctg883□ctg2206□□WAG-98F2  
ctg883□ctg2206□ctg3623□WAG-55L22  
ctg883□ctg2206□ctg3623□WAG-67G24  
ctg883□ctg2206□ctg3623□WAG-105A11  
ctg883□ctg2206□ctg6493□WAG-52C24

ctg883□ctg2206□ctg6493□WAG-106P18  
ctg883□ctg4146□ctg4397□WAG-46M6  
ctg883□ctg4146□ctg4397□WAG-48L15  
ctg884□ctg2083□□WAG-12L24  
ctg884□ctg2083□□WAG-76B15  
ctg884□ctg2083□□WAG-113D4  
ctg884□ctg2083□ctg2908□WAG-33B15  
ctg884□ctg2083□ctg2908□WAG-39P23  
ctg884□ctg2083□ctg2908□WAG-47A24  
ctg884□ctg2083□ctg2908□WAG-93F12  
ctg884□ctg2083□ctg2908□WAG-95D10  
ctg884□ctg2083□ctg2908□WAG-115D2  
ctg884□ctg2083□ctg2908□WAG-115F10  
ctg885□ctg1841□ctg2165□WAG-3K3  
ctg885□ctg1841□ctg2165□WAG-45F9  
ctg885□ctg1841□ctg2165□WAG-83M22  
ctg885□ctg1841□ctg2165□WAG-90M11  
ctg885□ctg1841□ctg2165□WAG-120C16  
ctg886□□□WAG-87P20  
ctg886□ctg2143□□WAG-112J11  
ctg886□ctg2143□ctg3510□WAG-65C13  
ctg886□ctg2143□ctg3510□WAG-65D13  
ctg886□ctg2143□ctg3510□WAG-96K15  
ctg886□ctg2143□ctg4981□WAG-29C17  
ctg886□ctg2143□ctg4981□WAG-63L15  
ctg887□□□WAG-42D14  
ctg887□ctg2145□ctg2634□WAG-58E24  
ctg887□ctg2145□ctg2634□WAG-105C9  
ctg887□ctg2145□ctg2634□WAG-105I8  
ctg887□ctg2145□ctg3879□WAG-35I19  
ctg887□ctg2145□ctg3879□WAG-51B15  
ctg887□ctg2145□ctg3879□WAG-51C15  
ctg888□ctg2219□ctg2095□WAG-4K2  
ctg888□ctg2219□ctg2095□WAG-43F12  
ctg888□ctg2219□ctg2095□WAG-51H11  
ctg888□ctg2219□ctg2095□WAG-90A17  
ctg888□ctg2219□ctg2095□WAG-116I3  
ctg888□ctg2219□ctg2095□WAG-126A15  
ctg889□ctg2221□ctg2101□WAG-24M4  
ctg889□ctg2221□ctg2101□WAG-43O8  
ctg889□ctg2221□ctg2101□WAG-45O5  
ctg889□ctg2221□ctg2101□WAG-48P5  
ctg889□ctg2221□ctg2101□WAG-55A15  
ctg889□ctg2221□ctg2101□WAG-98E11  
ctg889□ctg2221□ctg2101□WAG-123B7  
ctg89□ctg282□ctg496□WAG-22L23  
ctg89□ctg282□ctg496□WAG-25L10  
ctg89□ctg282□ctg496□WAG-59K13  
ctg89□ctg282□ctg496□WAG-65M12  
ctg89□ctg282□ctg496□WAG-72K17  
ctg89□ctg282□ctg496□WAG-100D7  
ctg89□ctg282□ctg496□WAG-106P13  
ctg89□ctg282□ctg496□WAG-115K22  
ctg89□ctg282□ctg496□WAG-116C3  
ctg89□ctg282□ctg496□WAG-116J14  
ctg890□□□WAG-31P14

ctg890□ctg2599□ctg2559□WAG-22E22  
ctg890□ctg2599□ctg2559□WAG-26G23  
ctg890□ctg2599□ctg2559□WAG-62P14  
ctg890□ctg2599□ctg2559□WAG-72F5  
ctg890□ctg2599□ctg2559□WAG-114G23  
ctg890□ctg4057□ctg4320□WAG-62K18  
ctg890□ctg4057□ctg4320□WAG-98L8  
ctg891□ctg1849□ctg2812□WAG-29M8  
ctg891□ctg1849□ctg2812□WAG-29N20  
ctg891□ctg1849□ctg2812□WAG-81P20  
ctg891□ctg1849□ctg2812□WAG-93I16  
ctg891□ctg1849□ctg2812□WAG-95A15  
ctg891□ctg1849□ctg2812□WAG-104O14  
ctg892□ctg2224□□WAG-12H3  
ctg892□ctg2224□□WAG-116N24  
ctg892□ctg2224□ctg2730□WAG-10G5  
ctg892□ctg2224□ctg2730□WAG-49D13  
ctg892□ctg2224□ctg2730□WAG-89G24  
ctg893□□□WAG-115M9  
ctg893□ctg2165□ctg2040□WAG-3A5  
ctg893□ctg2165□ctg2040□WAG-3L7  
ctg893□ctg2165□ctg2040□WAG-67J13  
ctg894□□□WAG-129D6  
ctg894□ctg2166□□WAG-82E19  
ctg894□ctg2166□□WAG-122H22  
ctg894□ctg2166□ctg3539□WAG-38D6  
ctg894□ctg2166□ctg3539□WAG-80H22  
ctg894□ctg2166□ctg3539□WAG-81G14  
ctg894□ctg2166□ctg3539□WAG-101C12  
ctg895□ctg1850□ctg1681□WAG-69P12  
ctg895□ctg1850□ctg1681□WAG-88M18  
ctg895□ctg1850□ctg1681□WAG-108O11  
ctg895□ctg1850□ctg1681□WAG-124O7  
ctg896□□□WAG-81L15  
ctg896□ctg2530□□WAG-21C11  
ctg896□ctg2530□□WAG-58B2  
ctg896□ctg2530□□WAG-115I5  
ctg896□ctg2530□ctg3690□WAG-92L10  
ctg896□ctg2530□ctg3690□WAG-114N2  
ctg896□ctg2530□ctg3690□WAG-121F11  
ctg896□ctg2530□ctg3690□WAG-126P17  
ctg897□□□WAG-110H22  
ctg897□ctg1995□ctg2399□WAG-22L12  
ctg897□ctg1995□ctg2399□WAG-78O10  
ctg897□ctg1995□ctg2399□WAG-82M3  
ctg897□ctg1995□ctg2399□WAG-123J24  
ctg897□ctg1995□ctg3849□WAG-87L7  
ctg897□ctg1995□ctg3849□WAG-121H14  
ctg897□ctg1995□ctg6512□WAG-14B15  
ctg897□ctg1995□ctg6512□WAG-26I2  
ctg897□ctg6443□□WAG-27L13  
ctg897□ctg6443□□WAG-40P6  
ctg898□ctg1873□□WAG-71D24  
ctg898□ctg1873□ctg2218□WAG-10I8  
ctg898□ctg1873□ctg2218□WAG-82O23  
ctg898□ctg1873□ctg2218□WAG-85L18

ctg898□ctg1873□ctg2218□WAG-103O9  
ctg898□ctg1873□ctg2218□WAG-116A9  
ctg899□□□WAG-23L23  
ctg899□□□WAG-72O21  
ctg899□□□WAG-102M4  
ctg899□ctg2590□□WAG-25C17  
ctg899□ctg2590□□WAG-83C13  
ctg899□ctg2590□□WAG-97L20  
ctg899□ctg2590□□WAG-122I9  
ctg899□ctg2590□ctg3399□WAG-42L13  
ctg899□ctg2590□ctg3399□WAG-51M2  
ctg899□ctg2590□ctg3399□WAG-57K3  
ctg899□ctg2590□ctg3399□WAG-59D6  
ctg899□ctg2590□ctg4390□WAG-61I14  
ctg899□ctg2590□ctg4390□WAG-111I11  
ctg899□ctg2590□ctg4390□WAG-117O11  
ctg899□ctg3586□ctg3758□WAG-38A19  
ctg899□ctg3586□ctg3758□WAG-41L7  
ctg899□ctg3586□ctg3758□WAG-80O18  
ctg9□□□WAG-111G16  
ctg9□ctg41□□WAG-86N4  
ctg9□ctg41□ctg43□WAG-10J1  
ctg9□ctg41□ctg43□WAG-17O17  
ctg9□ctg41□ctg43□WAG-29O18  
ctg9□ctg41□ctg43□WAG-31A8  
ctg9□ctg41□ctg43□WAG-33L19  
ctg9□ctg41□ctg43□WAG-36E1  
ctg9□ctg41□ctg43□WAG-36O12  
ctg9□ctg41□ctg43□WAG-38A21  
ctg9□ctg41□ctg43□WAG-45D22  
ctg9□ctg41□ctg43□WAG-47K19  
ctg9□ctg41□ctg43□WAG-65D8  
ctg9□ctg41□ctg43□WAG-72F4  
ctg9□ctg41□ctg43□WAG-77B13  
ctg9□ctg41□ctg43□WAG-79D13  
ctg9□ctg41□ctg43□WAG-102K14  
ctg9□ctg41□ctg43□WAG-104A8  
ctg9□ctg41□ctg43□WAG-118C17  
ctg9□ctg41□ctg43□WAG-123M14  
ctg9□ctg41□ctg879□WAG-52P15  
ctg9□ctg41□ctg879□WAG-99G21  
ctg9□ctg41□ctg879□WAG-100H24  
ctg9□ctg41□ctg879□WAG-112J15  
ctg9□ctg41□ctg879□WAG-128D9  
ctg90□□□WAG-3J6  
ctg90□□□WAG-14F4  
ctg90□□□WAG-75E10  
ctg90□□□WAG-98E2  
ctg90□ctg404□□WAG-27I1  
ctg90□ctg404□□WAG-37P6  
ctg90□ctg404□□WAG-70P18  
ctg90□ctg404□□WAG-72H7  
ctg90□ctg404□□WAG-82O24  
ctg90□ctg404□□WAG-113K20  
ctg90□ctg404□ctg1179□WAG-1J13  
ctg90□ctg404□ctg1179□WAG-19N17

ctg90□ctg404□ctg1179□WAG-37F19  
ctg90□ctg404□ctg1179□WAG-74K20  
ctg90□ctg404□ctg1179□WAG-84G20  
ctg90□ctg404□ctg1179□WAG-114L16  
ctg90□ctg404□ctg1179□WAG-129K4  
ctg90□ctg404□ctg3436□WAG-19H3  
ctg90□ctg404□ctg3436□WAG-76P5  
ctg90□ctg404□ctg3436□WAG-113I10  
ctg90□ctg404□ctg4955□WAG-25D4  
ctg90□ctg404□ctg4955□WAG-115B7  
ctg90□ctg404□ctg670□WAG-49F15  
ctg90□ctg404□ctg670□WAG-55J24  
ctg90□ctg404□ctg670□WAG-59D15  
ctg90□ctg404□ctg670□WAG-65P3  
ctg90□ctg404□ctg670□WAG-69D16  
ctg90□ctg404□ctg670□WAG-74J18  
ctg90□ctg404□ctg670□WAG-77J14  
ctg90□ctg404□ctg670□WAG-107F2  
ctg90□ctg404□ctg670□WAG-111P23  
ctg900□ctg2170□ctg2750□WAG-9B22  
ctg900□ctg2170□ctg2750□WAG-10L6  
ctg900□ctg2170□ctg2750□WAG-108M15  
ctg900□ctg2170□ctg2750□WAG-113N11  
ctg900□ctg2170□ctg4830□WAG-9P17  
ctg900□ctg2170□ctg4830□WAG-83O19  
ctg901□ctg2228□□WAG-117G6  
ctg901□ctg2228□ctg2117□WAG-4I20  
ctg901□ctg2228□ctg2117□WAG-115H24  
ctg901□ctg2228□ctg2117□WAG-117H5  
ctg901□ctg2228□ctg2117□WAG-122N11  
ctg901□ctg2228□ctg6742□WAG-64E10  
ctg901□ctg2228□ctg6742□WAG-79N9  
ctg902□□□WAG-9P10  
ctg902□□□WAG-56A23  
ctg902□□□WAG-58M1  
ctg902□ctg2183□ctg2058□WAG-3O6  
ctg902□ctg2183□ctg2058□WAG-10K20  
ctg902□ctg2183□ctg2058□WAG-18A6  
ctg902□ctg2183□ctg2058□WAG-110C9  
ctg902□ctg5830□□WAG-10G4  
ctg902□ctg5830□□WAG-36G23  
ctg903□□□WAG-111A6  
ctg903□ctg1864□ctg2201□WAG-62A13  
ctg903□ctg1864□ctg2201□WAG-63I23  
ctg903□ctg1864□ctg2201□WAG-109K2  
ctg903□ctg1864□ctg2201□WAG-113M7  
ctg903□ctg1864□ctg5384□WAG-107D2  
ctg903□ctg1864□ctg5384□WAG-112D5  
ctg904□ctg1865□ctg2179□WAG-2E21  
ctg904□ctg1865□ctg2179□WAG-17O12  
ctg904□ctg1865□ctg2179□WAG-52H15  
ctg904□ctg1865□ctg2179□WAG-56J24  
ctg904□ctg1865□ctg2179□WAG-61N17  
ctg904□ctg1865□ctg2179□WAG-124B16  
ctg904□ctg4564□ctg4711□WAG-69G20  
ctg904□ctg4564□ctg4711□WAG-80N3

ctg905□□□WAG-14L20  
ctg905□□□WAG-66I12  
ctg905□ctg3412□□WAG-50E19  
ctg905□ctg3412□ctg3514□WAG-16N4  
ctg905□ctg3412□ctg3514□WAG-18O7  
ctg905□ctg3412□ctg3514□WAG-125K2  
ctg905□ctg4767□ctg4979□WAG-16O24  
ctg905□ctg4767□ctg4979□WAG-46G1  
ctg905□ctg5565□ctg6718□WAG-1F19  
ctg905□ctg5565□ctg6718□WAG-4I7  
ctg906□ctg1870□ctg1958□WAG-18C18  
ctg906□ctg1870□ctg1958□WAG-39E18  
ctg906□ctg1870□ctg1958□WAG-49H23  
ctg906□ctg1870□ctg1958□WAG-104B11  
ctg906□ctg1870□ctg1958□WAG-113P22  
ctg907□□□WAG-107K18  
ctg907□ctg2222□ctg2230□WAG-6K21  
ctg907□ctg2222□ctg2230□WAG-6O23  
ctg907□ctg2222□ctg2230□WAG-44E16  
ctg907□ctg2222□ctg2230□WAG-57O10  
ctg907□ctg2222□ctg2230□WAG-72M7  
ctg907□ctg2222□ctg2230□WAG-105L11  
ctg907□ctg2222□ctg5162□WAG-23N20  
ctg907□ctg2222□ctg5162□WAG-58L24  
ctg907□ctg2222□ctg6566□WAG-50A15  
ctg907□ctg2222□ctg6566□WAG-56M5  
ctg908□ctg2237□□WAG-40P18  
ctg908□ctg2237□□WAG-85K15  
ctg908□ctg2237□□WAG-130B21  
ctg908□ctg2237□ctg3769□WAG-55J22  
ctg908□ctg2237□ctg3769□WAG-68H10  
ctg909□□□WAG-23N3  
ctg909□□□WAG-38G5  
ctg909□□□WAG-111G10  
ctg909□□□WAG-124E18  
ctg909□ctg2561□ctg2497□WAG-13I3  
ctg909□ctg2561□ctg2497□WAG-32M1  
ctg909□ctg2561□ctg2497□WAG-49F23  
ctg909□ctg2561□ctg2497□WAG-64A19  
ctg909□ctg2561□ctg2497□WAG-102D18  
ctg909□ctg2561□ctg2497□WAG-128K17  
ctg909□ctg2561□ctg3578□WAG-88G24  
ctg909□ctg2561□ctg3578□WAG-90C13  
ctg909□ctg2561□ctg3578□WAG-128J18  
ctg91□□□WAG-33O23  
ctg91□□□WAG-42B8  
ctg91□ctg292□ctg290□WAG-18P24  
ctg91□ctg292□ctg290□WAG-50F3  
ctg91□ctg292□ctg290□WAG-53A11  
ctg91□ctg292□ctg290□WAG-59J5  
ctg91□ctg292□ctg290□WAG-67C23  
ctg91□ctg292□ctg290□WAG-75I14  
ctg91□ctg292□ctg290□WAG-94K15  
ctg91□ctg292□ctg290□WAG-103H8  
ctg91□ctg292□ctg290□WAG-127M1  
ctg910□□□WAG-126D15

ctg910□ctg1876□ctg1712□WAG-36N12  
ctg910□ctg1876□ctg1712□WAG-50N3  
ctg910□ctg1876□ctg1712□WAG-68G1  
ctg911□□□WAG-26N19  
ctg911□□□WAG-33I18  
ctg911□□□WAG-85P18  
ctg911□ctg2239□□WAG-36C5  
ctg911□ctg2239□□WAG-43H21  
ctg911□ctg2239□ctg3587□WAG-96C15  
ctg911□ctg2239□ctg3587□WAG-104M4  
ctg911□ctg2239□ctg3587□WAG-111E22  
ctg911□ctg2239□ctg3587□WAG-120L5  
ctg912□ctg2435□ctg2346□WAG-46N7  
ctg912□ctg2435□ctg2346□WAG-71D2  
ctg912□ctg2435□ctg2346□WAG-89N21  
ctg912□ctg2435□ctg2346□WAG-95N14  
ctg912□ctg5157□ctg5834□WAG-39L4  
ctg912□ctg5157□ctg5834□WAG-127O21  
ctg913□□□WAG-5E6  
ctg913□ctg2701□□WAG-38D17  
ctg913□ctg2701□ctg3427□WAG-14C5  
ctg913□ctg2701□ctg3427□WAG-43B24  
ctg913□ctg2701□ctg3427□WAG-96M9  
ctg913□ctg2701□ctg4898□WAG-88A9  
ctg913□ctg2701□ctg4898□WAG-102D17  
ctg914□□□WAG-13K11  
ctg914□□□WAG-30E8  
ctg914□ctg2242□ctg2145□WAG-19O10  
ctg914□ctg2242□ctg2145□WAG-31N15  
ctg914□ctg2242□ctg2145□WAG-74A13  
ctg914□ctg2242□ctg2145□WAG-96K3  
ctg914□ctg2242□ctg6626□WAG-50L8  
ctg914□ctg2242□ctg6626□WAG-85N12  
ctg915□□□WAG-5I13  
ctg915□ctg2639□ctg2598□WAG-13G8  
ctg915□ctg2639□ctg2598□WAG-36O14  
ctg915□ctg2639□ctg2598□WAG-84E19  
ctg915□ctg3108□ctg3111□WAG-10N20  
ctg915□ctg3108□ctg3111□WAG-44B11  
ctg915□ctg3108□ctg3111□WAG-68G22  
ctg915□ctg6060□□WAG-22G17  
ctg915□ctg6060□□WAG-89O23  
ctg916□ctg1883□ctg3011□WAG-46P6  
ctg916□ctg1883□ctg3011□WAG-48A23  
ctg916□ctg1883□ctg3011□WAG-55B13  
ctg916□ctg1883□ctg3011□WAG-94B20  
ctg916□ctg1883□ctg3609□WAG-66M15  
ctg916□ctg1883□ctg3609□WAG-111E14  
ctg916□ctg1883□ctg3609□WAG-112I7  
ctg916□ctg2316□□WAG-99B4  
ctg916□ctg2316□ctg2991□WAG-44D4  
ctg916□ctg2316□ctg2991□WAG-114M2  
ctg916□ctg2316□ctg2991□WAG-123A13  
ctg916□ctg4808□ctg5055□WAG-54J2  
ctg916□ctg4808□ctg5055□WAG-103L7  
ctg916□ctg5020□ctg5509□WAG-65H18

ctg916□ctg5020□ctg5509□WAG-82K22  
ctg917□□□WAG-21N16  
ctg917□□□WAG-35N6  
ctg917□□□WAG-56E14  
ctg917□□□WAG-129N10  
ctg917□ctg2248□□WAG-67B8  
ctg917□ctg2248□□WAG-115D1  
ctg917□ctg2248□□WAG-121E20  
ctg917□ctg2248□ctg4723□WAG-25A21  
ctg917□ctg2248□ctg4723□WAG-40K8  
ctg917□ctg2248□ctg6549□WAG-57E24  
ctg917□ctg2248□ctg6549□WAG-83P1  
ctg918□□□WAG-118A11  
ctg918□ctg2207□ctg2084□WAG-39P20  
ctg918□ctg2207□ctg2084□WAG-63N12  
ctg918□ctg2207□ctg2084□WAG-98C18  
ctg918□ctg2207□ctg2084□WAG-117E18  
ctg918□ctg2535□ctg2465□WAG-17B21  
ctg918□ctg2535□ctg2465□WAG-49I21  
ctg918□ctg2535□ctg2465□WAG-128D22  
ctg919□□□WAG-95L23  
ctg919□ctg2209□ctg2087□WAG-65C21  
ctg919□ctg2209□ctg2087□WAG-72E20  
ctg919□ctg2209□ctg2087□WAG-121H20  
ctg919□ctg4017□ctg4284□WAG-95J21  
ctg919□ctg4017□ctg4284□WAG-112C18  
ctg92□□□WAG-N13  
ctg92□ctg380□ctg2780□WAG-105D7  
ctg92□ctg380□ctg2780□WAG-118L10  
ctg92□ctg380□ctg5043□WAG-37A12  
ctg92□ctg380□ctg5043□WAG-46K11  
ctg92□ctg380□ctg6331□WAG-45O2  
ctg92□ctg380□ctg6331□WAG-52J23  
ctg92□ctg380□ctg914□WAG-8G19  
ctg92□ctg380□ctg914□WAG-39J13  
ctg92□ctg380□ctg914□WAG-47H16  
ctg92□ctg380□ctg914□WAG-88O5  
ctg92□ctg380□ctg914□WAG-99D13  
ctg92□ctg380□ctg914□WAG-99E20  
ctg92□ctg380□ctg914□WAG-103B6  
ctg92□ctg380□ctg914□WAG-112A10  
ctg920□□□WAG-87B1  
ctg920□ctg2256□ctg3069□WAG-17N15  
ctg920□ctg2256□ctg3069□WAG-31O6  
ctg920□ctg2256□ctg3069□WAG-39P10  
ctg920□ctg2256□ctg3069□WAG-47I8  
ctg920□ctg2256□ctg3069□WAG-99F13  
ctg921□ctg1890□□WAG-90N22  
ctg921□ctg1890□ctg2566□WAG-22J18  
ctg921□ctg1890□ctg2566□WAG-47A15  
ctg921□ctg1890□ctg2566□WAG-51B6  
ctg921□ctg1890□ctg2566□WAG-75F17  
ctg921□ctg1890□ctg2566□WAG-75H23  
ctg921□ctg2498□□WAG-29E4  
ctg921□ctg2498□□WAG-45I14  
ctg921□ctg2498□□WAG-65D1



ctg921□ctg2498□□WAG-83J12  
ctg921□ctg2498□□WAG-108C22  
ctg921□ctg2498□ctg5798□WAG-78G17  
ctg921□ctg2498□ctg5798□WAG-103J8  
ctg922□□□WAG-21N2  
ctg922□ctg1891□□WAG-3H9  
ctg922□ctg1891□□WAG-12K3  
ctg922□ctg1891□ctg3028□WAG-48I21  
ctg922□ctg1891□ctg3028□WAG-61H2  
ctg922□ctg1891□ctg3028□WAG-79J18  
ctg922□ctg1891□ctg3028□WAG-123M2  
ctg923□ctg2213□ctg2091□WAG-40H24  
ctg923□ctg2213□ctg2091□WAG-49P9  
ctg923□ctg2213□ctg2091□WAG-65C23  
ctg923□ctg2213□ctg2091□WAG-93P20  
ctg923□ctg2213□ctg4509□WAG-29B11  
ctg923□ctg2213□ctg4509□WAG-102G22  
ctg924□ctg2214□□WAG-114E24  
ctg924□ctg2214□ctg2714□WAG-25H7  
ctg924□ctg2214□ctg2714□WAG-67M15  
ctg924□ctg2214□ctg2714□WAG-123L22  
ctg924□ctg2214□ctg2714□WAG-128E13  
ctg924□ctg3377□ctg3454□WAG-14C9  
ctg924□ctg3377□ctg3454□WAG-18J10  
ctg924□ctg3377□ctg3454□WAG-51J20  
ctg924□ctg4289□□WAG-61C9  
ctg924□ctg4289□□WAG-114M20  
ctg924□ctg4289□ctg6236□WAG-71K15  
ctg924□ctg4289□ctg6236□WAG-92E15  
ctg925□□□WAG-18A13  
ctg925□□□WAG-31H13  
ctg925□□□WAG-130M5  
ctg925□ctg2262□□WAG-126A17  
ctg925□ctg2262□ctg3434□WAG-40H4  
ctg925□ctg2262□ctg3434□WAG-91J21  
ctg925□ctg2262□ctg3434□WAG-102F6  
ctg925□ctg2262□ctg3434□WAG-123B20  
ctg925□ctg2262□ctg4003□WAG-29E12  
ctg925□ctg2262□ctg4003□WAG-33G5  
ctg925□ctg2262□ctg4003□WAG-89E12  
ctg925□ctg3666□□WAG-126I1  
ctg925□ctg3666□ctg5017□WAG-10I9  
ctg925□ctg3666□ctg5017□WAG-43E23  
ctg926□ctg2218□□WAG-54D22  
ctg926□ctg2218□□WAG-62M24  
ctg926□ctg2218□ctg2718□WAG-22C20  
ctg926□ctg2218□ctg2718□WAG-63F2  
ctg926□ctg2218□ctg2718□WAG-75F2  
ctg926□ctg2218□ctg2718□WAG-91F13  
ctg927□□□WAG-35K3  
ctg927□□□WAG-98H6  
ctg927□ctg1893□□WAG-63K8  
ctg927□ctg1893□□WAG-97J13  
ctg927□ctg1893□□WAG-110K20  
ctg927□ctg1893□ctg2905□WAG-B9  
ctg927□ctg1893□ctg2905□WAG-10K11

ctg927□ctg1893□ctg2905□WAG-78G10  
ctg928□□□WAG-35M1  
ctg928□□□WAG-130H23  
ctg928□ctg1894□□WAG-24C16  
ctg928□ctg1894□□WAG-62L22  
ctg928□ctg1894□ctg2245□WAG-15O22  
ctg928□ctg1894□ctg2245□WAG-21N5  
ctg928□ctg1894□ctg2245□WAG-55H22  
ctg928□ctg1894□ctg2245□WAG-58D5  
ctg928□ctg1894□ctg2671□WAG-6A24  
ctg928□ctg1894□ctg2671□WAG-29O8  
ctg928□ctg1894□ctg2671□WAG-46L17  
ctg928□ctg1894□ctg2671□WAG-99J5  
ctg928□ctg1894□ctg4420□WAG-32E3  
ctg928□ctg1894□ctg4420□WAG-41O13  
ctg928□ctg1894□ctg4420□WAG-122D20  
ctg929□ctg1895□□WAG-20A5  
ctg929□ctg1895□ctg3162□WAG-16J8  
ctg929□ctg1895□ctg3162□WAG-89N3  
ctg929□ctg1895□ctg3162□WAG-123K16  
ctg929□ctg1895□ctg5459□WAG-57N22  
ctg929□ctg1895□ctg5459□WAG-111B2  
ctg929□ctg5218□ctg5970□WAG-54A11  
ctg929□ctg5218□ctg5970□WAG-68I10  
ctg93□□□WAG-22C7  
ctg93□ctg438□ctg346□WAG-12M21  
ctg93□ctg438□ctg346□WAG-45A19  
ctg93□ctg438□ctg346□WAG-56N10  
ctg93□ctg438□ctg346□WAG-64B2  
ctg93□ctg438□ctg346□WAG-74K19  
ctg93□ctg438□ctg346□WAG-81I20  
ctg93□ctg438□ctg346□WAG-88J8  
ctg93□ctg438□ctg346□WAG-103I12  
ctg93□ctg438□ctg346□WAG-113M22  
ctg93□ctg5600□ctg6770□WAG-2B14  
ctg93□ctg5600□ctg6770□WAG-31I1  
ctg930□ctg2270□ctg3359□WAG-47J2  
ctg930□ctg2270□ctg3359□WAG-48K19  
ctg930□ctg2270□ctg3359□WAG-86L19  
ctg930□ctg2270□ctg3359□WAG-117D24  
ctg930□ctg2270□ctg3359□WAG-130E18  
ctg930□ctg2270□ctg5056□WAG-65D2  
ctg930□ctg2270□ctg5056□WAG-97C3  
ctg931□ctg1897□□WAG-25J2  
ctg931□ctg1897□ctg2961□WAG-45K9  
ctg931□ctg1897□ctg2961□WAG-74E5  
ctg931□ctg1897□ctg2961□WAG-91O16  
ctg931□ctg1897□ctg2961□WAG-92K14  
ctg932□ctg1902□ctg1738□WAG-85A15  
ctg932□ctg1902□ctg1738□WAG-117I19  
ctg932□ctg1902□ctg1738□WAG-117J10  
ctg932□ctg1902□ctg1738□WAG-121H1  
ctg932□ctg2970□ctg2954□WAG-12M20  
ctg932□ctg2970□ctg2954□WAG-47G14  
ctg932□ctg2970□ctg2954□WAG-125K7  
ctg933□ctg2677□□WAG-34P21

ctg933□ctg2677□□WAG-123G24  
ctg933□ctg2677□ctg2647□WAG-47C18  
ctg933□ctg2677□ctg2647□WAG-92I6  
ctg933□ctg2677□ctg2647□WAG-116M11  
ctg934□ctg1903□ctg1741□WAG-22E24  
ctg934□ctg1903□ctg1741□WAG-33G20  
ctg934□ctg1903□ctg1741□WAG-51L16  
ctg935□ctg2164□ctg2114□WAG-12K19  
ctg935□ctg2164□ctg2114□WAG-67M12  
ctg935□ctg2164□ctg2114□WAG-98I8  
ctg935□ctg2164□ctg2114□WAG-99O1  
ctg935□ctg2164□ctg2114□WAG-108M19  
ctg935□ctg3828□ctg4093□WAG-1J14  
ctg935□ctg3828□ctg4093□WAG-22L9  
ctg936□ctg2607□□WAG-67J3  
ctg936□ctg2607□□WAG-87H18  
ctg936□ctg2607□□WAG-102A13  
ctg936□ctg2607□□WAG-110C2  
ctg936□ctg2607□ctg3559□WAG-16J12  
ctg936□ctg2607□ctg3559□WAG-25E1  
ctg936□ctg2607□ctg3559□WAG-64D20  
ctg937□□□WAG-35C1  
ctg937□ctg2282□ctg2829□WAG-9M7  
ctg937□ctg2282□ctg2829□WAG-30G13  
ctg937□ctg2282□ctg2829□WAG-94I12  
ctg937□ctg2282□ctg2829□WAG-110F20  
ctg937□ctg2282□ctg2829□WAG-126O22  
ctg937□ctg2282□ctg4491□WAG-49H16  
ctg937□ctg2282□ctg4491□WAG-61G6  
ctg938□ctg2688□ctg3400□WAG-30C23  
ctg938□ctg2688□ctg3400□WAG-58I7  
ctg938□ctg2688□ctg3400□WAG-128J9  
ctg938□ctg2688□ctg5697□WAG-38C8  
ctg938□ctg2688□ctg5697□WAG-73C16  
ctg938□ctg6096□□WAG-49E12  
ctg938□ctg6096□□WAG-116N3  
ctg939□□□WAG-29C14  
ctg939□□□WAG-55J16  
ctg939□□□WAG-96F14  
ctg939□ctg2690□□WAG-23A24  
ctg939□ctg2690□□WAG-114H20  
ctg939□ctg2690□ctg5985□WAG-9P15  
ctg939□ctg2690□ctg5985□WAG-129O17  
ctg939□ctg2690□ctg6949□WAG-38C18  
ctg939□ctg2690□ctg6949□WAG-82H3  
ctg94□□□WAG-54G22  
ctg94□ctg371□□WAG-23H22  
ctg94□ctg371□ctg368□WAG-16F2  
ctg94□ctg371□ctg368□WAG-17M21  
ctg94□ctg371□ctg368□WAG-30L2  
ctg94□ctg371□ctg368□WAG-50L17  
ctg94□ctg371□ctg368□WAG-70M8  
ctg94□ctg371□ctg368□WAG-75O4  
ctg94□ctg371□ctg368□WAG-84G9  
ctg94□ctg371□ctg368□WAG-86E13  
ctg94□ctg371□ctg368□WAG-98D13

ctg94□ctg371□ctg368□WAG-99G18  
ctg94□ctg371□ctg368□WAG-99O5  
ctg94□ctg371□ctg368□WAG-104B22  
ctg94□ctg371□ctg368□WAG-110E13  
ctg94□ctg371□ctg368□WAG-111H19  
ctg94□ctg371□ctg368□WAG-116I14  
ctg94□ctg371□ctg368□WAG-118D1  
ctg940□ctg1917□□WAG-59O23  
ctg940□ctg1917□ctg2199□WAG-36C19  
ctg940□ctg1917□ctg2199□WAG-114N9  
ctg940□ctg1917□ctg2199□WAG-116B10  
ctg940□ctg1917□ctg2199□WAG-129J24  
ctg941□ctg2308□ctg2207□WAG-7A23  
ctg941□ctg2308□ctg2207□WAG-47E2  
ctg941□ctg2308□ctg2207□WAG-48J14  
ctg941□ctg2308□ctg2207□WAG-108K24  
ctg941□ctg4009□ctg5547□WAG-64D5  
ctg941□ctg4009□ctg5547□WAG-91B16  
ctg941□ctg4009□ctg6160□WAG-40E23  
ctg941□ctg4009□ctg6160□WAG-82H8  
ctg941□ctg5082□ctg5647□WAG-9N20  
ctg941□ctg5082□ctg5647□WAG-43N20  
ctg942□□□WAG-110D8  
ctg942□ctg2553□□WAG-11P18  
ctg942□ctg2553□ctg3185□WAG-21B24  
ctg942□ctg2553□ctg3185□WAG-84K9  
ctg942□ctg2553□ctg3185□WAG-114E23  
ctg942□ctg4871□ctg5165□WAG-49I23  
ctg942□ctg4871□ctg5165□WAG-67H12  
ctg943□□□WAG-24K23  
ctg943□□□WAG-33H21  
ctg943□ctg2696□□WAG-103N8  
ctg943□ctg2696□ctg2681□WAG-35K15  
ctg943□ctg2696□ctg2681□WAG-97H12  
ctg943□ctg2696□ctg2681□WAG-128M17  
ctg943□ctg6112□□WAG-66F15  
ctg943□ctg6112□□WAG-104B14  
ctg944□ctg1920□ctg3092□WAG-31A3  
ctg944□ctg1920□ctg3092□WAG-70H1  
ctg944□ctg1920□ctg3092□WAG-81H8  
ctg944□ctg1920□ctg3092□WAG-92G3  
ctg944□ctg1920□ctg3092□WAG-127B13  
ctg945□ctg1926□ctg2982□WAG-23G23  
ctg945□ctg1926□ctg2982□WAG-43A8  
ctg945□ctg1926□ctg2982□WAG-84M18  
ctg945□ctg1926□ctg2982□WAG-123C11  
ctg945□ctg1926□ctg4231□WAG-104E6  
ctg945□ctg1926□ctg4231□WAG-114C21  
ctg945□ctg5868□ctg6937□WAG-52L7  
ctg945□ctg5868□ctg6937□WAG-79B10  
ctg946□□□WAG-58K18  
ctg946□ctg2317□ctg2223□WAG-12A8  
ctg946□ctg2317□ctg2223□WAG-34D2  
ctg946□ctg2317□ctg2223□WAG-75I18  
ctg946□ctg2317□ctg2223□WAG-104G11  
ctg947□ctg1930□ctg1767□WAG-46F9

ctg947□ctg1930□ctg1767□WAG-101O4  
ctg947□ctg1930□ctg1767□WAG-102H11  
ctg948□□□WAG-13B3  
ctg948□□□WAG-29E19  
ctg948□ctg1932□ctg1770□WAG-11K16  
ctg948□ctg1932□ctg1770□WAG-44M10  
ctg948□ctg1932□ctg1770□WAG-82D15  
ctg948□ctg1932□ctg1770□WAG-127G21  
ctg948□ctg3157□ctg3177□WAG-45N4  
ctg948□ctg3157□ctg3177□WAG-67B10  
ctg948□ctg4983□ctg5416□WAG-38O11  
ctg948□ctg4983□ctg5416□WAG-44I15  
ctg949□ctg2244□□□WAG-52D7  
ctg949□ctg2244□ctg2151□WAG-44L4  
ctg949□ctg2244□ctg2151□WAG-65K13  
ctg949□ctg2244□ctg2151□WAG-82N17  
ctg949□ctg2244□ctg2818□WAG-45E12  
ctg949□ctg2244□ctg2818□WAG-98E8  
ctg949□ctg2244□ctg2818□WAG-127G8  
ctg95□ctg377□ctg382□WAG-17N11  
ctg95□ctg377□ctg382□WAG-24G21  
ctg95□ctg377□ctg382□WAG-29N14  
ctg95□ctg377□ctg382□WAG-50P17  
ctg95□ctg377□ctg382□WAG-57J23  
ctg95□ctg377□ctg382□WAG-62A12  
ctg95□ctg377□ctg382□WAG-74E10  
ctg95□ctg377□ctg382□WAG-91C10  
ctg95□ctg377□ctg382□WAG-95I22  
ctg95□ctg377□ctg382□WAG-114A23  
ctg95□ctg377□ctg382□WAG-118E13  
ctg950□ctg2247□ctg2154□WAG-38I19  
ctg950□ctg2247□ctg2154□WAG-53M14  
ctg950□ctg2247□ctg2154□WAG-63O8  
ctg950□ctg2247□ctg2154□WAG-104K9  
ctg950□ctg2247□ctg2154□WAG-109J16  
ctg951□ctg2255□ctg2158□WAG-107F9  
ctg951□ctg2255□ctg2158□WAG-109E13  
ctg951□ctg2255□ctg2158□WAG-121A12  
ctg951□ctg2255□ctg2158□WAG-128N18  
ctg951□ctg2570□ctg2523□WAG-31M14  
ctg951□ctg2570□ctg2523□WAG-59I17  
ctg951□ctg2570□ctg2523□WAG-73G9  
ctg951□ctg2570□ctg2523□WAG-110A15  
ctg952□□□WAG-27L5  
ctg952□ctg2251□□□WAG-19N18  
ctg952□ctg2251□□□WAG-66E9  
ctg952□ctg2251□ctg2897□WAG-24J4  
ctg952□ctg2251□ctg2897□WAG-74D19  
ctg952□ctg2251□ctg2897□WAG-95K17  
ctg953□□□WAG-71M13  
ctg953□ctg2328□□□WAG-110I20  
ctg953□ctg2328□ctg3018□WAG-33B22  
ctg953□ctg2328□ctg3018□WAG-71E10  
ctg953□ctg2328□ctg3018□WAG-106C21  
ctg953□ctg2328□ctg3018□WAG-115P11  
ctg953□ctg2328□ctg3018□WAG-126F17

ctg954□ctg1943□ctg2317□WAG-2C8  
ctg954□ctg1943□ctg2317□WAG-57M19  
ctg954□ctg1943□ctg2317□WAG-61E24  
ctg954□ctg1943□ctg2317□WAG-71D23  
ctg954□ctg1943□ctg2317□WAG-130L5  
ctg955□□□WAG-94L10  
ctg955□ctg1945□ctg1788□WAG-20K24  
ctg955□ctg1945□ctg1788□WAG-102B17  
ctg955□ctg1945□ctg1788□WAG-109N19  
ctg955□ctg1945□ctg1788□WAG-124L9  
ctg955□ctg2389□ctg2290□WAG-45P18  
ctg955□ctg2389□ctg2290□WAG-82D19  
ctg955□ctg2389□ctg2290□WAG-113L4  
ctg956□□□WAG-78L20  
ctg956□□□WAG-87B21  
ctg956□ctg2348□□□WAG-106D10  
ctg956□ctg2348□ctg3628□WAG-72A11  
ctg956□ctg2348□ctg3628□WAG-95N21  
ctg956□ctg2348□ctg3628□WAG-127E1  
ctg956□ctg2348□ctg5626□WAG-50J10  
ctg956□ctg2348□ctg5626□WAG-73K7  
ctg956□ctg2461□ctg2378□WAG-5B3  
ctg956□ctg2461□ctg2378□WAG-30C13  
ctg956□ctg2461□ctg2378□WAG-117M20  
ctg956□ctg2461□ctg2378□WAG-129C16  
ctg957□ctg2050□□□WAG-111O9  
ctg957□ctg2050□ctg2601□WAG-42E23  
ctg957□ctg2050□ctg2601□WAG-45E1  
ctg957□ctg2050□ctg2601□WAG-61G24  
ctg957□ctg2050□ctg2601□WAG-68F3  
ctg957□ctg2050□ctg2601□WAG-89F9  
ctg958□□□WAG-11G14  
ctg958□ctg2263□ctg2166□WAG-53P16  
ctg958□ctg2263□ctg2166□WAG-58D4  
ctg958□ctg2263□ctg2166□WAG-71M6  
ctg958□ctg2263□ctg2166□WAG-77I11  
ctg959□□□WAG-42K16  
ctg959□□□WAG-54J1  
ctg959□□□WAG-64C23  
ctg959□ctg2434□ctg2344□WAG-15F13  
ctg959□ctg2434□ctg2344□WAG-80H1  
ctg959□ctg2434□ctg2344□WAG-91I10  
ctg959□ctg2434□ctg2344□WAG-96B17  
ctg96□ctg327□□□WAG-51A4  
ctg96□ctg327□ctg427□WAG-31K20  
ctg96□ctg327□ctg427□WAG-40O1  
ctg96□ctg327□ctg427□WAG-53E11  
ctg96□ctg327□ctg427□WAG-72I7  
ctg96□ctg327□ctg427□WAG-75G16  
ctg96□ctg327□ctg427□WAG-123F19  
ctg960□ctg1956□□□WAG-58A4  
ctg960□ctg1956□ctg2452□WAG-15C6  
ctg960□ctg1956□ctg2452□WAG-52C13  
ctg960□ctg1956□ctg2452□WAG-56C24  
ctg961□□□WAG-2D22  
ctg961□ctg1959□ctg1797□WAG-11G22

ctg961□ctg1959□ctg1797□WAG-64F15  
ctg961□ctg1959□ctg1797□WAG-72M3  
ctg961□ctg1959□ctg1797□WAG-93N22  
ctg961□ctg5725□□WAG-28F7  
ctg961□ctg5725□□WAG-78P22  
ctg962□□□WAG-37L2  
ctg962□ctg2340□ctg3032□WAG-49M8  
ctg962□ctg2340□ctg3032□WAG-56H9  
ctg962□ctg2340□ctg3032□WAG-73I15  
ctg962□ctg2340□ctg3032□WAG-124G21  
ctg963□□□WAG-49E6  
ctg963□ctg2777□□WAG-46P4  
ctg963□ctg2777□ctg3900□WAG-18N13  
ctg963□ctg2777□ctg3900□WAG-30A18  
ctg963□ctg2777□ctg3900□WAG-93I4  
ctg963□ctg2777□ctg3900□WAG-106P19  
ctg963□ctg2777□ctg6880□WAG-53L24  
ctg963□ctg2777□ctg6880□WAG-54G5  
ctg963□ctg3427□□WAG-121G7  
ctg963□ctg3427□ctg4616□WAG-67A2  
ctg963□ctg3427□ctg4616□WAG-77F10  
ctg964□□□WAG-12J14  
ctg964□□□WAG-50C22  
ctg964□□□WAG-59N12  
ctg964□ctg2342□ctg2247□WAG-15E13  
ctg964□ctg2342□ctg2247□WAG-24I18  
ctg964□ctg2342□ctg2247□WAG-90F24  
ctg964□ctg2342□ctg2247□WAG-113A21  
ctg965□ctg1963□ctg2461□WAG-18J6  
ctg965□ctg1963□ctg2461□WAG-42E16  
ctg965□ctg1963□ctg2461□WAG-59L17  
ctg965□ctg1963□ctg2461□WAG-113K23  
ctg965□ctg1963□ctg2461□WAG-129O21  
ctg966□ctg2283□ctg2188□WAG-16M22  
ctg966□ctg2283□ctg2188□WAG-63D22  
ctg966□ctg2283□ctg2188□WAG-106D22  
ctg966□ctg2283□ctg2188□WAG-111H23  
ctg966□ctg2283□ctg2188□WAG-119H2  
ctg967□□□WAG-67H7  
ctg967□ctg2356□□WAG-48K16  
ctg967□ctg2356□□WAG-105K9  
ctg967□ctg2356□ctg4170□WAG-16F21  
ctg967□ctg2356□ctg4170□WAG-16L3  
ctg967□ctg2356□ctg4170□WAG-84G1  
ctg967□ctg2356□ctg6767□WAG-12M1  
ctg967□ctg2356□ctg6767□WAG-37F11  
ctg968□ctg2361□□WAG-66M12  
ctg968□ctg2361□□WAG-101L15  
ctg968□ctg2361□ctg3061□WAG-24L9  
ctg968□ctg2361□ctg3061□WAG-52F10  
ctg968□ctg2361□ctg3061□WAG-71C3  
ctg968□ctg2361□ctg3061□WAG-105L12  
ctg969□ctg2288□ctg2192□WAG-11E3  
ctg969□ctg2288□ctg2192□WAG-20F23  
ctg969□ctg2288□ctg2192□WAG-65B16  
ctg969□ctg6350□□WAG-41I7

ctg969□ctg6350□□WAG-63K7  
ctg97□□□WAG-30B8  
ctg97□□□WAG-44P13  
ctg97□ctg382□ctg287□WAG-22A2  
ctg97□ctg382□ctg287□WAG-38B22  
ctg97□ctg382□ctg287□WAG-47J13  
ctg97□ctg382□ctg287□WAG-62P1  
ctg97□ctg382□ctg287□WAG-80B10  
ctg97□ctg382□ctg287□WAG-89K3  
ctg97□ctg382□ctg287□WAG-129O8  
ctg970□ctg1972□ctg1820□WAG-3M1  
ctg970□ctg1972□ctg1820□WAG-5O9  
ctg970□ctg1972□ctg1820□WAG-116G12  
ctg970□ctg1972□ctg1820□WAG-119G23  
ctg971□□□WAG-1B2  
ctg971□ctg2371□ctg2268□WAG-74O10  
ctg971□ctg2371□ctg2268□WAG-81L11  
ctg971□ctg2371□ctg2268□WAG-96N11  
ctg972□□□WAG-70J9  
ctg972□ctg2299□□WAG-3C12  
ctg972□ctg2299□□WAG-111N4  
ctg972□ctg2299□ctg3884□WAG-78B6  
ctg972□ctg2299□ctg3884□WAG-85O1  
ctg972□ctg2299□ctg3884□WAG-126L10  
ctg973□ctg2372□ctg2269□WAG-10F17  
ctg973□ctg2372□ctg2269□WAG-10H10  
ctg973□ctg2372□ctg2269□WAG-88F5  
ctg973□ctg2372□ctg2269□WAG-117D22  
ctg973□ctg2372□ctg2269□WAG-120M22  
ctg974□□□WAG-66J2  
ctg974□ctg2379□□WAG-42M4  
ctg974□ctg2379□ctg3077□WAG-16H3  
ctg974□ctg2379□ctg3077□WAG-58K19  
ctg974□ctg2379□ctg3077□WAG-98O16  
ctg975□□□WAG-116L9  
ctg975□ctg2309□□WAG-19F12  
ctg975□ctg2309□ctg2862□WAG-62P24  
ctg975□ctg2309□ctg2862□WAG-63O20  
ctg975□ctg2309□ctg2862□WAG-119N12  
ctg976□ctg1985□ctg2389□WAG-2M22  
ctg976□ctg1985□ctg2389□WAG-59J12  
ctg976□ctg1985□ctg2389□WAG-101I22  
ctg976□ctg1985□ctg2389□WAG-123C8  
ctg977□ctg1986□ctg2500□WAG-12M23  
ctg977□ctg1986□ctg2500□WAG-30K11  
ctg977□ctg1986□ctg2500□WAG-58C10  
ctg977□ctg1986□ctg2500□WAG-67B22  
ctg978□ctg1987□□WAG-70C5  
ctg978□ctg1987□ctg2501□WAG-53C15  
ctg978□ctg1987□ctg2501□WAG-94G17  
ctg978□ctg1987□ctg2501□WAG-122E14  
ctg979□□□WAG-111P14  
ctg979□ctg2178□□WAG-82I22  
ctg979□ctg2178□ctg2855□WAG-10B16  
ctg979□ctg2178□ctg2855□WAG-26J24  
ctg979□ctg2178□ctg2855□WAG-30O8



ctg979□ctg2178□ctg2855□WAG-78D14  
ctg98□□□WAG-25M20  
ctg98□□□WAG-38J11  
ctg98□□□WAG-51P18  
ctg98□ctg1561□□WAG-62G16  
ctg98□ctg1561□ctg1959□WAG-7B11  
ctg98□ctg1561□ctg1959□WAG-10L1  
ctg98□ctg1561□ctg1959□WAG-17J22  
ctg98□ctg1561□ctg1959□WAG-21C20  
ctg98□ctg1561□ctg1959□WAG-44K1  
ctg98□ctg1561□ctg1959□WAG-75K15  
ctg98□ctg1561□ctg1959□WAG-82D21  
ctg98□ctg1561□ctg1959□WAG-88E7  
ctg98□ctg1561□ctg1959□WAG-93D10  
ctg98□ctg4765□ctg4976□WAG-58O18  
ctg98□ctg4765□ctg4976□WAG-124B22  
ctg98□ctg658□ctg612□WAG-23H4  
ctg98□ctg658□ctg612□WAG-55J1  
ctg98□ctg658□ctg612□WAG-58C12  
ctg98□ctg658□ctg612□WAG-64F21  
ctg98□ctg658□ctg612□WAG-69P13  
ctg98□ctg658□ctg612□WAG-94J12  
ctg98□ctg658□ctg612□WAG-122N10  
ctg98□ctg658□ctg612□WAG-123J5  
ctg98□ctg658□ctg612□WAG-128O17  
ctg98□ctg658□ctg612□WAG-130M1  
ctg98□ctg658□ctg6228□WAG-108O7  
ctg98□ctg658□ctg6228□WAG-109H21  
ctg980□□□WAG-67B24  
ctg980□ctg2872□□WAG-12I17  
ctg980□ctg2872□ctg3723□WAG-10B6  
ctg980□ctg2872□ctg3723□WAG-51F10  
ctg980□ctg2872□ctg3723□WAG-93E14  
ctg980□ctg2872□ctg3723□WAG-93F14  
ctg981□□□WAG-86K1  
ctg981□ctg1992□□WAG-17O23  
ctg981□ctg1992□□WAG-47C16  
ctg981□ctg1992□□WAG-70A20  
ctg981□ctg1992□ctg3348□WAG-70O6  
ctg981□ctg1992□ctg3348□WAG-75N6  
ctg981□ctg1992□ctg3348□WAG-78O9  
ctg981□ctg3359□□WAG-21L6  
ctg981□ctg3359□□WAG-81C14  
ctg981□ctg3359□□WAG-94C13  
ctg981□ctg3359□□WAG-115M7  
ctg982□□□WAG-18H5  
ctg982□ctg2490□□WAG-115O12  
ctg982□ctg2490□ctg3109□WAG-16G14  
ctg982□ctg2490□ctg3109□WAG-104H11  
ctg982□ctg2490□ctg3109□WAG-121F13  
ctg982□ctg2490□ctg3109□WAG-128H18  
ctg982□ctg2787□ctg2776□WAG-11I8  
ctg982□ctg2787□ctg2776□WAG-43F4  
ctg982□ctg2787□ctg2776□WAG-62N16  
ctg982□ctg2787□ctg2776□WAG-120H12  
ctg983□□□WAG-77I22

ctg983□ctg2001□□WAG-32O5  
ctg983□ctg2001□ctg3215□WAG-30O5  
ctg983□ctg2001□ctg3215□WAG-69H17  
ctg983□ctg2001□ctg3215□WAG-104J5  
ctg983□ctg2001□ctg3215□WAG-123C6  
ctg983□ctg3151□□WAG-70O10  
ctg983□ctg3151□ctg4311□WAG-5E2  
ctg983□ctg3151□ctg4311□WAG-15H19  
ctg983□ctg3151□ctg4311□WAG-20K20  
ctg984□□□WAG-5N17  
ctg984□ctg2004□□WAG-84E13  
ctg984□ctg2004□ctg2532□WAG-24L14  
ctg984□ctg2004□ctg2532□WAG-120F18  
ctg985□ctg2730□ctg3632□WAG-48M2  
ctg985□ctg2730□ctg3632□WAG-59I4  
ctg985□ctg2730□ctg3632□WAG-62G24  
ctg985□ctg2730□ctg3632□WAG-73K1  
ctg985□ctg2730□ctg5142□WAG-108N15  
ctg985□ctg2730□ctg5142□WAG-108N17  
ctg986□ctg2010□ctg2414□WAG-64O10  
ctg986□ctg2010□ctg2414□WAG-64P10  
ctg986□ctg2010□ctg2414□WAG-101K14  
ctg986□ctg2010□ctg2414□WAG-118F23  
ctg987□□□WAG-90B18  
ctg987□ctg2011□□WAG-124D20  
ctg987□ctg2011□ctg2416□WAG-75L23  
ctg987□ctg2011□ctg2416□WAG-91N3  
ctg987□ctg2011□ctg2416□WAG-93B13  
ctg987□ctg2823□□WAG-5F5  
ctg987□ctg2823□ctg2820□WAG-53B18  
ctg987□ctg2823□ctg2820□WAG-66M21  
ctg987□ctg2823□ctg2820□WAG-109H22  
ctg988□□□WAG-47A19  
ctg988□□□WAG-88O21  
ctg988□ctg2803□□WAG-40O6  
ctg988□ctg2803□ctg3811□WAG-42C1  
ctg988□ctg2803□ctg3811□WAG-82H23  
ctg988□ctg2803□ctg3811□WAG-85E22  
ctg988□ctg2803□ctg5169□WAG-43P20  
ctg988□ctg2803□ctg5169□WAG-76G14  
ctg989□ctg2411□□WAG-43K3  
ctg989□ctg2411□□WAG-80K16  
ctg989□ctg2411□ctg3461□WAG-7H7  
ctg989□ctg2411□ctg3461□WAG-38N9  
ctg989□ctg2411□ctg3461□WAG-70L3  
ctg989□ctg2411□ctg5251□WAG-63I3  
ctg989□ctg2411□ctg5251□WAG-116I11  
ctg99□□□WAG-O20  
ctg99□□□WAG-35H18  
ctg99□□□WAG-57H23  
ctg99□□□WAG-112K22  
ctg99□□□WAG-122D4  
ctg99□ctg2534□□WAG-40B9  
ctg99□ctg2534□□WAG-68M5  
ctg99□ctg2534□□WAG-119J14  
ctg99□ctg2534□ctg4371□WAG-34B18

ctg99□ctg2534□ctg4371□WAG-49B5  
ctg99□ctg2534□ctg4371□WAG-74A14  
ctg99□ctg2534□ctg4371□WAG-86K20  
ctg99□ctg395□□WAG-78P12  
ctg99□ctg395□□WAG-103B1  
ctg99□ctg395□□WAG-110D4  
ctg99□ctg395□ctg471□WAG-13H3  
ctg99□ctg395□ctg471□WAG-20A21  
ctg99□ctg395□ctg471□WAG-24E7  
ctg99□ctg395□ctg471□WAG-41M21  
ctg99□ctg395□ctg471□WAG-45K13  
ctg99□ctg395□ctg471□WAG-49M5  
ctg99□ctg395□ctg471□WAG-56O3  
ctg99□ctg395□ctg471□WAG-59L7  
ctg99□ctg395□ctg471□WAG-72N20  
ctg99□ctg395□ctg471□WAG-89N23  
ctg99□ctg395□ctg471□WAG-105I13  
ctg99□ctg395□ctg471□WAG-117P5  
ctg99□ctg395□ctg471□WAG-119F5  
ctg990□ctg2013□ctg1855□WAG-42G3  
ctg990□ctg2013□ctg1855□WAG-69F3  
ctg990□ctg2013□ctg1855□WAG-78M16  
ctg990□ctg2013□ctg1855□WAG-110F19  
ctg991□□□WAG-123C2  
ctg991□ctg2334□□WAG-43C13  
ctg991□ctg2334□□WAG-127K20  
ctg991□ctg2334□ctg3957□WAG-50B6  
ctg991□ctg2334□ctg3957□WAG-58I11  
ctg991□ctg2334□ctg3957□WAG-127F10  
ctg992□□□WAG-43P19  
ctg992□ctg2119□□WAG-38E1  
ctg992□ctg2119□□WAG-61G13  
ctg992□ctg2119□ctg2324□WAG-41N14  
ctg992□ctg2119□ctg2324□WAG-42L14  
ctg992□ctg2119□ctg2324□WAG-50E4  
ctg992□ctg2119□ctg2324□WAG-60B15  
ctg993□ctg2426□□WAG-23N8  
ctg993□ctg2426□ctg3145□WAG-69K13  
ctg993□ctg2426□ctg3145□WAG-85K13  
ctg993□ctg2426□ctg3145□WAG-106J13  
ctg993□ctg2674□□WAG-5B24  
ctg993□ctg2674□□WAG-99D2  
ctg993□ctg2674□ctg4614□WAG-69F21  
ctg993□ctg2674□ctg4614□WAG-84H18  
ctg994□□□WAG-128I5  
ctg994□ctg2735□□WAG-3P7  
ctg994□ctg2735□ctg2712□WAG-6K2  
ctg994□ctg2735□ctg2712□WAG-12B4  
ctg994□ctg2735□ctg2712□WAG-92G12  
ctg994□ctg2735□ctg2712□WAG-125H2  
ctg995□ctg3352□ctg4002□WAG-72F21  
ctg995□ctg3352□ctg4002□WAG-73I7  
ctg995□ctg3352□ctg4002□WAG-112B20  
ctg995□ctg3352□ctg5781□WAG-88C23  
ctg995□ctg3352□ctg5781□WAG-121O11  
ctg995□ctg4033□ctg4291□WAG-77B17

ctg995□ctg4033□ctg4291□WAG-98G1  
ctg995□ctg5587□ctg6736□WAG-95O14  
ctg995□ctg5587□ctg6736□WAG-100I5  
ctg996□ctg2025□□WAG-105L2  
ctg996□ctg2025□ctg1873□WAG-16B13  
ctg996□ctg2025□ctg1873□WAG-67K19  
ctg996□ctg2025□ctg1873□WAG-75O15  
ctg996□ctg2025□ctg1873□WAG-123J2  
ctg997□ctg2026□□WAG-29F9  
ctg997□ctg2026□ctg1875□WAG-55J8  
ctg997□ctg2026□ctg1875□WAG-61P5  
ctg997□ctg2026□ctg1875□WAG-72C8  
ctg997□ctg2026□ctg1875□WAG-99E3  
ctg997□ctg2026□ctg5819□WAG-29C19  
ctg997□ctg2026□ctg5819□WAG-100D3  
ctg997□ctg2026□ctg6102□WAG-46O18  
ctg997□ctg2026□ctg6102□WAG-110E17  
ctg997□ctg5395□ctg6377□WAG-99H9  
ctg997□ctg5395□ctg6377□WAG-118D20  
ctg998□□□WAG-2E14  
ctg998□□□WAG-37I21  
ctg998□□□WAG-46H16  
ctg998□ctg3239□□WAG-32C24  
ctg998□ctg3239□ctg3278□WAG-51P20  
ctg998□ctg3239□ctg3278□WAG-120O9  
ctg998□ctg3239□ctg3278□WAG-128N20  
ctg999□□□WAG-13G1  
ctg999□□□WAG-44K23  
ctg999□□□WAG-116K9  
ctg999□ctg2759□□WAG-47E5  
ctg999□ctg2759□□WAG-117A14  
ctg999□ctg2759□ctg3693□WAG-67N9  
ctg999□ctg2759□ctg3693□WAG-74A11  
ctg999□ctg2759□ctg3693□WAG-79I13  
ctg999□ctg3678□ctg3872□WAG-67N12  
ctg999□ctg3678□ctg3872□WAG-86D7  
ctg999□ctg3678□ctg3872□WAG-109I22
