# Supplementary material
Source: publisher figshare collection journal article supplement (https://karger.figshare.com/articles/dataset/_/5104408)
Supplement: Supplementary file 2 [file 1]

6568SupplementTB1.txt

UMA1.051  
ADL0176 WAG-40A2  
ROS0330  
ST15BE107  
WAG-23P1,WAG-51P9,WAG-52J12,WAG-62G6,WAG-62H6,WAG-67G19,  
WAG-77E21,WAG-113E5,WAG-116G15  
STZBE005WAG-34F1  
ADL0377  
ST10BE076  
WAG-28F24,WAG-29M9,WAG-33L4,WAG-36H24,WAG-61J13,WAG-82M1  
2  
ST10BE114  
WAG-13H20,WAG-31O4,WAG-47F6,WAG-54O13,WAG-60K20,WAG-65M  
5,WAG-123B12  
MCW0041  
ADL0314 WAG-74B8  
MCW0264WAG-36E13  
ST10BE306  
WAG-15B15,WAG-17G12,WAG-18K20,WAG-37H12,WAG-38K13,WAG-60I  
13,WAG-67K9,WAG-83A9,WAG-88P11,WAG-124N19  
MCW0355  
ST15BE054 WAG-3E4,WAG-25G20,WAG-44A4,WAG-91F8  
MCW0277  
ROS0060 WAG-82H22,WAG-89A4,WAG-59D22  
ADL0228 WAG-55L19  
ROS0093  
ABR0083 WAG-51C22  
LEI0251  
WAG-9J11,WAG-36O9,WAG-47K3,WAG-48C9,WAG-73O18,WAG-85M16  
ST13BE046 WAG-55A7,WAG-73C9,WAG-81F4,WAG-96E13  
ST10BE227 WAG-23K12,WAG-111A21,WAG-118I9  
ADL0106  
WAG-14B17,WAG-21F7,WAG-33M13,WAG-92N10,WAG-96G21  
ABR0017 WAG-48L18,WAG-20G3,WAG-5J20  
ST13BE056 WAG-36O9,WAG-48C9,WAG-87E6  
LEI0146 WAG-31B10  
ST10BE034A  
WAG-5A18,WAG-33G14,WAG-46D23,WAG-59C22,WAG-77N21,WAG-112  
M15

6568SupplementTB1.txt

LEI0112 WAG-35C19,WAG-35L19,WAG-55K19  
MCW0317WAG-83F14  
MCW0325WAG-10P2  
MCW0112WAG-43G6  
ST15BE100  
WAG-23M2,WAG-26M6,WAG-50B14,WAG-53A22,WAG-68M6,WAG-90C1  
4  
MCW0241  
GCT0054 WAG-43G23,WAG-93I1  
ROS0112 WAG-46N8,WAG-113P13  
ST10BE026B WAG-62C5,WAG-67O3,WAG-95M3,WAG-97L17  
ABR0085  
ST10BE054  
WAG-52G2,WAG-65B24,WAG-87N14,WAG-120P16,WAG-128N11  
ST10BE022  
WAG-6C14,WAG-31E13,WAG-35L19,WAG-44P1,WAG-55K19,WAG-106G  
2,WAG-127N23  
ST13BE039  
WAG-9A3,WAG-21F21,WAG-27L21,WAG-30H13,WAG-31B2,WAG-48G16,  
WAG-69O1,WAG-83I13,WAG-106B6,WAG-110B21,WAG-127D9  
PRRX1sts1 WAG-4N13,WAG-35A14  
ROS0053 WAG-97H17,WAG-51D7,WAG-92N4,WAG-79I3  
ST8BE055WAG-11I22,WAG-52E16,WAG-78D3,WAG-87F8  
ST10BE410 WAG-62F18  
ABR0341 WAG-24J22,WAG-28M5,WAG-53N14,WAG-91P24  
ST10BE189  
WAG-29L15,WAG-61I6,WAG-85E6,WAG-109N4,WAG-130H4  
ST10BE438 WAG-3K14,WAG-33K5  
LEI0161 WAG-70M12  
ST10BE233  
WAG-15B15,WAG-17G12,WAG-18K20,WAG-37H12,WAG-38K13,WAG-60I  
13,WAG-67K9,WAG-83A9,WAG-88P11,WAG-106I12,WAG-121K2,WAG-12  
4N19  
ST8BE025WAG-11I22,WAG-49G5,WAG-104L2  
ST10BE378  
WAG-10D16,WAG-37P21,WAG-52A2,WAG-59A8,WAG-66M1,WAG-75E9,  
WAG-122B16,WAG-124B2  
ST10BE034B  
WAG-5A18,WAG-33G14,WAG-46D23,WAG-59C22,WAG-77N21,WAG-112

6568SupplementTB1.txt

M15  
MCW0094  
ST15BE129  
WAG-18K22,WAG-26M20,WAG-60A13,WAG-79K11,WAG-81M16  
MCW0263WAG-37H20,WAG-68K23  
ST10BE417  
WAG-17I4,WAG-59J8,WAG-87F4,WAG-94E23,WAG-113D3,WAG-125D5  
ST13BE062           WAG-15N11  
ST10BE209           WAG-32G11,WAG-58I23,WAG-102P17,WAG-128J22  
MCW0177WAG-3G3,WAG-10G19,WAG-1O17  
MCW0077WAG-70E9  
MCW0147  
WAG-7C10,WAG-10H13,WAG-43F1,WAG-60H5,WAG-73P21,WAG-87M16  
,WAG-90I2,WAG-123A6  
GCT0901  
ABR0066A           WAG-2E16,WAG-79H21  
ADL0258  
ROS0017  
ST24BE004  
WAG-4A12,WAG-21H8,WAG-74B23,WAG-80I23,WAG-111I5,WAG-117J22  
MCW0078  
WAG-128L20,WAG-116M14,WAG-37N7,WAG-78A17,WAG-90P15  
LEI0110   WAG-12F3  
UMA4.027  
ST10BE469  
WAG-25C15,WAG-25E15,WAG-25E23,WAG-32B9,WAG-34M10,WAG-92P  
23,WAG-94A10,WAG-105K15,WAG-119P18  
ABR0348  
ST8BE048  
WAG-80I10,WAG-104D1,WAG-105C7,WAG-106M5,WAG-114L6,WAG-130  
L6  
LEI0106   WAG-12A14  
MCW0231WAG-33I23,WAG-58J20,WAG-107C20  
ROS0147  
ST10BE199  
WAG-53J16,WAG-86J14,WAG-106E7,WAG-113A17,WAG-114C9  
ST15BE076           WAG-69H7,WAG-93I23  
ST10BE218           WAG-36H4,WAG-126N12  
ABR0025   WAG-91I14,WAG-94L3

6568SupplementTB1.txt

ST10BE038A WAG-14H2  
ST10BE459 WAG-12J19,WAG-125M15  
ROS0104  
ST13BE043  
WAG-2G20,WAG-3E18,WAG-9A3,WAG-14M2,WAG-20F6,WAG-27L21,W  
AG-30H13,WAG-100K14  
LEI0081 WAG-43O24,WAG-105B2,WAG-25K13  
ST10BE366 WAG-106O20  
LEI0091 WAG-12H11  
LEI0326  
MCW0245WAG-107L24  
ST28BE017  
WAG-36G5,WAG-52I15,WAG-76L19,WAG-90G10,WAG-101F14,WAG-105  
J12,WAG-123D1,WAG-128C16  
ST15BE120 WAG-33I23,WAG-56D2,WAG-58J20  
ST24BE057 WAG-110M2  
ST10BE278 WAG-40N15,WAG-70H21,WAG-92I14,WAG-130A7  
ST10BE381  
WAG-39N23,WAG-59B20,WAG-64D16,WAG-104P22,WAG-121B2  
ST15BE051  
WAG-7C24,WAG-25G20,WAG-40M23,WAG-77K8,WAG-79G17  
ST10BE251  
WAG-29M9,WAG-47A19,WAG-61J13,WAG-82M12,WAG-114P21,WAG-11  
5B20  
ROS0312  
MCW0035WAG-18I3,WAG-35C17,WAG-38A10,WAG-70N14,WAG-77J12  
ST28BE007  
WAG-3D16,WAG-10K15,WAG-17L13,WAG-61L24,WAG-94N13,WAG-99N  
6  
ST15BE085  
WAG-31O19,WAG-43G23,WAG-58F23,WAG-70F4,WAG-71N20,WAG-114I  
1  
MCW0107WAG-30E8  
LEI0343 WAG-97C23  
ST24BE060  
WAG-35G12,WAG-77J6,WAG-81O13,WAG-84E2,WAG-88M4,WAG-100I2  
3  
ADL0112B WAG-98C19  
LEI0075 WAG-71O17

6568SupplementTB1.txt

ST8BE061WAG-80I10,WAG-112C4  
HUJ0012 WAG-88N19  
ST4BE003WAG-41N15  
ST4BE004WAG-83I3  
GCT0015 WAG-8N10,WAG-95J7,WAG-85A10,WAG-79O10  
MCW0106WAG-31B16  
ST10BE107  
WAG-26J7,WAG-31K6,WAG-35F1,WAG-126F8,WAG-126J21,WAG-129G5  
MCW0210WAG-3K18  
ADL0237  
STXBE008 WAG-8N1  
LEI0193 WAG-13I14  
ST13BE006  
WAG-32D22,WAG-44H19,WAG-69B23,WAG-105H14,WAG-109L19,WAG-113I15  
CALB1 WAG-6D24  
ST10BE136  
WAG-9L4,WAG-25D3,WAG-40N12,WAG-82E14,WAG-110B17  
ROS0020 WAG-26K19,WAG-41M7  
ST10BE046  
WAG-6C14,WAG-14H5,WAG-31E13,WAG-44P1,WAG-106G2,WAG-127N2  
3  
ROS0120  
ST10BE117 WAG-13G16,WAG-24D18,WAG-33G17,WAG-57M15  
MCW0183WAG-11J9  
GCT0008  
NTRK3sts1 WAG-62D3,WAG-96N16  
ADL0198 WAG-6P21  
ABR0327  
FASN  
ROS0150  
ADL0319 WAG-13F5,WAG-43N11,WAG-48L24,WAG-90B15  
ADL0219  
GCT0905  
WAG-52H13,WAG-52J4,WAG-77J23,WAG-83H3,WAG-95H4,WAG-95N16,  
WAG-110I2,WAG-120A18  
ST28BE041  
WAG-35E23,WAG-36G5,WAG-52I15,WAG-58B18,WAG-67A5,WAG-90M1  
5,WAG-91D10,WAG-123D1

6568SupplementTB1.txt

GCT0001 WAG-28J5,WAG-6C24,WAG-34G22,WAG-40I2  
ROS0103  
ROS0347  
UMA1.019 WAG-E11  
ADL0292 WAG-37P17  
ST10BE105  
WAG-6C14,WAG-14H5,WAG-31E13,WAG-44P1,WAG-55K19,WAG-106G2,  
WAG-127N23  
MCW0314  
WAG-39C12,WAG-44E15,WAG-65F10,WAG-55K6,WAG-32K11,WAG-107  
D5  
ANX2sts1  
WAG-9F14,WAG-14F9,WAG-23H20,WAG-24N23,WAG-24P4,WAG-29H18,  
WAG-64E24,WAG-99E9,WAG-102N14,WAG-112J16  
ABR0343  
MCW0305WAG-11N3,WAG-66H6,WAG-45B15  
ST10BE272 WAG-62D3,WAG-96N16  
RPL4sts1  
WAG-26A13,WAG-33P11,WAG-34P2,WAG-87G1,WAG-101L6,WAG-107L  
4,WAG-109H23,WAG-122L16  
ST10BE428 WAG-34L7,WAG-35E13,WAG-48G7,WAG-84J17  
MCW0058WAG-28J18  
ADL0115  
WAG-35I15,WAG-85C20,WAG-74E19,WAG-81C1,WAG-109E16,WAG-80C  
6,WAG-64P24,WAG-103F14  
MCW0150WAG-104I7,WAG-62L19  
UMA4.005  
MCW0257  
ADL0188  
ACACA  
ROS0157  
ADL0301 WAG-43P21  
ST10BE298 WAG-14M18  
ADL0181  
ABR0001  
WAG-121I6,WAG-56F5,WAG-24D18,WAG-121I19,WAG-121H19,WAG-95I  
24,WAG-17I12  
CRYBB3sts1 WAG-31O19,WAG-58F23,WAG-70F4  
MCW0193WAG-40L16,WAG-86O7

ROS0098  
ABR0037 WAG-53F11  
ROS0109  
ST10BE129  
WAG-3G19,WAG-32E23,WAG-39H13,WAG-47O13,WAG-95M3,WAG-123  
O24  
MCW0073WAG-12H4,WAG-12H17  
ST10BE450 WAG-6P18,WAG-50B12  
ST15BE082 WAG-3B7,WAG-43O6,WAG-101E21  
ST8BE041WAG-11A14,WAG-32O21  
ST28BE062 WAG-11D6,WAG-112H22,WAG-130L22  
LEI0104  
WAG-83E21,WAG-81A2,WAG-118I22,WAG-123F10,WAG-45B10,WAG-11  
4C3,WAG-122C16,WAG-123C24,WAG-2O20  
MCW0063WAG-26B13  
ADL0262 WAG-25H8  
HUJ0009  
ROS0081  
LEI0246 WAG-97M3,WAG-91H8,WAG-65H3,WAG-105F17  
ADL0117 WAG-82N20,WAG-82N19,WAG-69M13,WAG-20M21  
ST8BE068WAG-3L15,WAG-123M6  
MCW0366  
ST10BE202 WAG-37P23  
ABR0053 WAG-36I7  
LEI0136  
WAG-I7,WAG-31K15,WAG-61F13,WAG-88M9,WAG-97I7,WAG-117I17,W  
AG-126P7  
MCW0157WAG-26A22  
MCW0272  
WAG-49K24,WAG-112D24,WAG-85E1,WAG-44D23,WAG-28P9,WAG-13N  
4  
ROS0019 WAG-8L7,WAG-25I13  
ST10BE350 WAG-66D9  
ST10BE445  
WAG-11M13,WAG-20F17,WAG-54P10,WAG-63B12,WAG-107E22,WAG-1  
26A3,WAG-126B3  
ST15BE010  
WAG-10J18,WAG-19G6,WAG-48H11,WAG-61L19,WAG-105J17,WAG-112  
N23

6568SupplementTB1.txt

ST10BE462  
WAG-3P20,WAG-26E16,WAG-34O16,WAG-75C23,WAG-76O22,WAG-94O  
5,WAG-95B14,WAG-114N14  
STxBE001WAG-26F18  
ROS0023  
ST8BE051WAG-43P21,WAG-79B19,WAG-93I6,WAG-130F23  
ADL0271 WAG-121K1,WAG-12F21,WAG-84F15  
ST10BE175  
WAG-12H1,WAG-58I23,WAG-81N11,WAG-109K23,WAG-130H1  
ST15BE113 WAG-9A5,WAG-30E18,WAG-32L12  
ST15BE093 WAG-14A5,WAG-17B7,WAG-89N24  
ST15BE015 WAG-3B7,WAG-3E4,WAG-91F8  
ST10BE024  
WAG-32L24,WAG-53A5,WAG-54J24,WAG-60D4,WAG-60M23,WAG-61L1  
4,WAG-62M7,WAG-115F19,WAG-120O11,WAG-129K21  
ST10BE395 WAG-38G23  
ST8BE64 WAG-M18  
MCW0217  
ST10BE291 WAG-86J14  
MCW0254WAG-27D5,WAG-9M16,WAG-28E24  
ST24BE048 WAG-70P15,WAG-118E14  
ST10BE015  
WAG-13H20,WAG-46J7,WAG-54O13,WAG-60K20,WAG-65M5,WAG-86F2  
ADL0191 WAG-27D19  
ADL0233 WAG-18N3  
MCW0274WAG-82N9  
ST10BE142  
WAG-12H1,WAG-62M5,WAG-81N11,WAG-109K23,WAG-128B22  
MCW0381  
ST28BE073 WAG-64M15  
ST10BE155  
WAG-28O4,WAG-62C5,WAG-67O3,WAG-95M3,WAG-97L17  
ST13BE002  
WAG-10C22,WAG-21K10,WAG-36I1,WAG-36P1,WAG-36P9,WAG-57F10,  
WAG-128B16  
UMA1.070  
ST10BE402 WAG-6M13,WAG-47B3,WAG-62G10,WAG-79C12  
ROS0153  
MCW0069WAG-28I1,WAG-41F19



6568SupplementTB1.txt

ANX2

WAG-9F14,WAG-14F9,WAG-23H20,WAG-24N23,WAG-24P4,WAG-29H18,  
WAG-64E24,WAG-99E9,WAG-102N14,WAG-112J16

MCW0109

ST15BE134

WAG-25A10,WAG-34E12,WAG-54N17,WAG-65B10,WAG-66B16,WAG-67  
A7,WAG-75J12,WAG-95A18,WAG-120K22

ST15BE106           WAG-11J14,WAG-125K19

ROS0348

ROS0337

ST10BE064           WAG-106H14

MCW0160WAG-11L5

ST8BE037WAG-1L1

ST15BE067

WAG-7G1,WAG-30E18,WAG-34P19,WAG-63J14,WAG-63L13,WAG-73B20  
,WAG-86I18,WAG-98F5

MCW0332WAG-11C21,WAG-18I24

LEI0127

WAG-90P8,WAG-9O11,WAG-115I8,WAG-9P11,WAG-77B19,WAG-59H15,  
WAG-40G4,WAG-123E3

ST1BE002WAG-71L23

ST10BE122

WAG-37D10,WAG-47M18,WAG-53G5,WAG-72B5,WAG-83C15

LEI0068   WAG-24H22

MCW0201WAG-27C3

ABR0054   WAG-87P5,WAG-95C14

ADL0226

ADL0273   WAG-28K22,WAG-38K22

ADL0044

ADL0308   WAG-54E23,WAG-56E23

ADL0210

MCW0145

MCW0208WAG-14P8

ST15BE012           WAG-51P9,WAG-77E21,WAG-113E5

ST10BE368           WAG-26E5,WAG-67L14,WAG-124H13

MCW0377

ST24BE036           WAG-9G24,WAG-63J23,WAG-96O14

ADL0196   WAG-26M13,WAG-129C1

CYP11Asts1

6568SupplementTB1.txt

WAG-30I3,WAG-44J9,WAG-73O10,WAG-79O11,WAG-116O21  
ST8BE063WAG-10D10,WAG-17F1,WAG-43J5,WAG-65D15,WAG-116B9  
ST10BE134  
WAG-9B12,WAG-9B13,WAG-11C16,WAG-43E13,WAG-49A9,WAG-54B22,  
WAG-62L21,WAG-62N24,WAG-105K7  
GCT0003 WAG-35L19,WAG-55K19  
ADL0255  
ST10BE042  
WAG-13H20,WAG-31O4,WAG-47F6,WAG-54O13,WAG-60K20,WAG-65M  
5,WAG-123B12  
ST10BE347 WAG-6P18,WAG-24N8,WAG-35F23,WAG-50B12  
ST8BE058WAG-53D24,WAG-66I21,WAG-69K15,WAG-73M7,WAG-92D12  
MCW0323WAG-30E18,WAG-86I18  
MCW0119WAG-43A20,WAG-120F16  
ST8BE053WAG-41O13  
ST13BE008 WAG-40H4  
ST28BE005 WAG-2E16,WAG-79H21  
LEI0108 WAG-119F18  
ST10BE311 WAG-63P9,WAG-87E12,WAG-89G4  
ST24BE028  
WAG-I4,WAG-18B16,WAG-53D10,WAG-59F14,WAG-75H4,WAG-82D7,W  
AG-107B9  
ST10BE318 WAG-1H21,WAG-50G23  
ST10BE230  
WAG-13K12,WAG-43H13,WAG-46P11,WAG-67H10,WAG-74F17,WAG-85  
C2  
ST10BE238  
WAG-16P10,WAG-31D19,WAG-41P2,WAG-47O2,WAG-59F2,WAG-68H11,  
WAG-121B23  
ROS0078 WAG-9J23  
ST24BE026  
WAG-17F18,WAG-29M15,WAG-32E7,WAG-64O5,WAG-81E9,WAG-92O9,  
WAG-110C11,WAG-114P6  
ST15BE005  
WAG-20E20,WAG-21A10,WAG-49K11,WAG-124M19,WAG-129M23  
ROS0025 WAG-43H16,WAG-64A1,WAG-41B3,WAG-26J10  
CRYBB1sts3 WAG-43G23,WAG-93I1  
MCW0114WAG-34G7  
ST10BE229 WAG-5E7,WAG-48D5,WAG-75O1,WAG-84C24

6568SupplementTB1.txt

LEI0348 WAG-34G1,WAG-9I21,WAG-117E8  
MCW0085WAG-23C12  
ST15BE122 WAG-17H24,WAG-31O19,WAG-58F23,WAG-70F4  
ROS0091 WAG-9B12,WAG-62L21,WAG-62N24  
LEI0160 WAG-97I11  
ADL0285  
LEI0254 WAG-91J3  
ST10BE197 WAG-40M2,WAG-85K24,WAG-121M24  
ST10BE446 WAG-93K6  
ROS0305  
LEI0114 WAG-111F14,WAG-56B12,WAG-86J13,WAG-39I2  
ST10BE411  
WAG-21N12,WAG-72L17,WAG-76O6,WAG-94F2,WAG-99O10  
SLC24A1sts1  
WAG-6C6,WAG-13D13,WAG-38G10,WAG-40D23,WAG-60C8,WAG-98B22  
,WAG-126E23,WAG-128O8  
ROS0084 WAG-57B16,WAG-79G16,WAG-75J17,WAG-129H3  
ST10BE471 WAG-110I5  
ST28BE013  
WAG-32P6,WAG-40K13,WAG-107M7,WAG-117E6,WAG-118N17,WAG-12  
1D5  
ADL0143 WAG-8H20  
MCW0284  
ST10BE348 WAG-50G22,WAG-59O7,WAG-62D3,WAG-96N16  
FLJ20724sts1  
WAG-18C17,WAG-42N15,WAG-64C20,WAG-70H21,WAG-72G13,WAG-76  
C21,WAG-92I14,WAG-104A23,WAG-130A7  
ST13BE058 WAG-69B23  
UMA4.024 WAG-44L11,WAG-37E19,WAG-127G16,WAG-44L20  
LEI0199 WAG-62B21,WAG-90N8  
ST10BE081  
WAG-33P11,WAG-34P2,WAG-87G1,WAG-101L6,WAG-107L4  
MCW0092WAG-17A24,WAG-71A5,WAG-76K5  
MCW0243  
ST13BE053 WAG-35C23  
ADL0279 WAG-17H13  
ST24BE083  
WAG-13K16,WAG-20C24,WAG-21J22,WAG-70C6,WAG-77L2,WAG-109E1  
5,WAG-114D24

6568SupplementTB1.txt

ROS0072 WAG-25H19  
ABR0012 WAG-12O9,WAG-71I20  
MCW0048WAG-9L23  
ADL0163 WAG-27K22  
ROS0062 WAG-119H22,WAG-83C22  
MCW0027WAG-75K22,WAG-127M23,WAG-94O2  
ST10BE020  
WAG-4D24,WAG-50O2,WAG-68N20,WAG-76J21,WAG-81A21,WAG-92L8  
ST28BE019  
WAG-4F10,WAG-17L13,WAG-37O5,WAG-56F16,WAG-76C22,WAG-106N  
20,WAG-107M12,WAG-122H18  
ADL0177 WAG-6M18,WAG-45A24,WAG-93C5  
ST10BE452 WAG-85D8,WAG-86P20,WAG-105M15,WAG-121K12  
ST10BE435 WAG-15K5  
ADL0298 WAG-9B13  
ST28BE089 WAG-119P15  
CKMT WAG-G9  
ST15BE109 WAG-7C24,WAG-93I23,WAG-124M22  
ST10BE058A  
WAG-8E18,WAG-37E7,WAG-40K19,WAG-54H24,WAG-62A8,WAG-70G8,  
WAG-80E6,WAG-82N21,WAG-121C5  
ST24BE055  
WAG-20M12,WAG-41M4,WAG-79A3,WAG-108O2,WAG-121I20,WAG-122  
F24  
ROS0067  
ADL0122 WAG-36P17  
MCW0295WAG-125P16  
ST10BE406 WAG-30F7  
ST10BE216  
WAG-47D11,WAG-59F21,WAG-73O1,WAG-83F7,WAG-90J16,WAG-129N  
18  
ST10BE074 WAG-14A9,WAG-38M3,WAG-42G15,WAG-118P9  
ST10BE333  
WAG-40O6,WAG-42C1,WAG-43P20,WAG-47A19,WAG-85E22,WAG-108N  
17  
MCW0017WAG-10C13,WAG-10E13  
ST10BE408 WAG-3D24,WAG-111J23  
FLJ20086sts1  
WAG-24D24,WAG-34F3,WAG-49O15,WAG-77O22,WAG-123M13

6568SupplementTB1.txt

ST24BE002  
WAG-20E8,WAG-32F12,WAG-37C4,WAG-61J1,WAG-61J22  
ST15BE056  
WAG-8B13,WAG-17J22,WAG-21C20,WAG-44K1,WAG-62G16,WAG-75K1  
5,WAG-82D21,WAG-88E7  
ST10BE467 WAG-59A20,WAG-64A5,WAG-98O18  
ST15BE074  
WAG-23M2,WAG-44P19,WAG-50B14,WAG-73N1,WAG-80I13,WAG-90C1  
4,WAG-97O6  
CRABP1sts1 WAG-25P22  
ADL0159  
ST10BE110 WAG-29A16  
ROS0314  
MCW0037WAG-13L14  
ST15BE060 WAG-44P19,WAG-109B14,WAG-121G24  
STxBE006WAG-D1  
ST10BE289  
WAG-9C7,WAG-36A10,WAG-63A18,WAG-77A9,WAG-118P13  
ST15BE118  
WAG-34E12,WAG-54N17,WAG-59E20,WAG-71C22,WAG-95A18,WAG-12  
0K22  
ST10BE448 WAG-26E5,WAG-73C2,WAG-82O13  
ST9BE001WAG-41O5  
TPM1sts1  
WAG-24A11,WAG-28A1,WAG-76M9,WAG-76N4,WAG-97N18,WAG-106L  
14,WAG-114N6  
GCT0039 WAG-20P15,WAG-33A2  
ROS0022 WAG-27I7  
ST10BE044 WAG-8E18,WAG-33O18  
MCW0361  
MCW0357  
WAG-11N12,WAG-33O18,WAG-40K19,WAG-73M1,WAG-80E6,WAG-82N  
21,WAG-97P7  
STZBE003WAG-50C3  
ROS0114  
GCT0055 WAG-11C21,WAG-40H23  
ABR0070  
WAG-44B3,WAG-80I22,WAG-100N21,WAG-122C13,WAG-123O18,WAG-1  
28E18,WAG-129C21

6568SupplementTB1.txt

ST2BE004WAG-34N9  
ST10BE109  
WAG-6I19,WAG-16D10,WAG-18C18,WAG-28E16,WAG-32P9,WAG-34F3,  
WAG-71G12,WAG-77O22,WAG-123M13  
GCT0031  
ST24BE071  
WAG-3K5,WAG-24B8,WAG-32E7,WAG-35M11,WAG-65L6,WAG-105M13,  
WAG-121K3,WAG-127P14  
ST10BE356  
WAG-10P15,WAG-24P1,WAG-38B15,WAG-52K9,WAG-60H24,WAG-83F1  
2,WAG-85O3,WAG-101K22,WAG-104L14,WAG-105I17  
ST10BE375  
WAG-37G22,WAG-65C14,WAG-68E11,WAG-69H5,WAG-118F4  
ABR0345  
ST8BE011  
WAG-1M23,WAG-20O13,WAG-43P21,WAG-50D16,WAG-79B19,WAG-93I  
6,WAG-119N11,WAG-130F23  
ST24BE045  
WAG-4K2,WAG-8L4,WAG-13K16,WAG-59J17,WAG-74H24,WAG-104J24,  
WAG-114N7  
ST10BE007  
WAG-3O3,WAG-8G11,WAG-18B17,WAG-53C21,WAG-71J5,WAG-85A1,W  
AG-92G21,WAG-97B5,WAG-101K20,WAG-124B18,WAG-124E9,WAG-125  
E4  
ST10BE340           WAG-14N6,WAG-19M9,WAG-19M19  
ST10BE038B       WAG-14H2  
ST15BE136       WAG-13H11,WAG-86M10,WAG-112P2  
ST24BE070  
WAG-58J9,WAG-60E10,WAG-63J23,WAG-99I22,WAG-121D14  
ST10BE464       WAG-48M2,WAG-108N15  
ABR0047 WAG-C6,WAG-G12,WAG-4F8  
ADL0132  
ST8BE018WAG-55H22  
MCW0248WAG-30P7,WAG-38I16  
MCW0247WAG-M13  
ROS0339  
ADL0268  
MCW0006WAG-53O16,WAG-67F1  
ST15BE094       WAG-37I8,WAG-84E8

6568SupplementTB1.txt

ST24BE063           WAG-7K13,WAG-27A5  
ST10BE012  
WAG-52G2,WAG-65B24,WAG-69K20,WAG-117D23,WAG-120P16,WAG-1  
26E23,WAG-127I15  
MCW0128  
LEI0237   WAG-7O19  
ADL0231   WAG-64C20,WAG-70H21,WAG-92I14  
ABR0061   WAG-126H3,WAG-96L4,WAG-54I8  
ST8BE007  
WAG-11A14,WAG-44I24,WAG-63H23,WAG-76N9,WAG-82M23,WAG-85N  
11,WAG-91F18  
ROS0014   WAG-28J2,WAG-6M8  
ST10BE359           WAG-50B21  
ST10BE170  
WAG-7K20,WAG-27I17,WAG-38K3,WAG-44K11,WAG-55A5,WAG-80L3,W  
AG-83N17,WAG-118H9  
LEI0071  
ST13BE019           WAG-18H2,WAG-68D1  
ST10BE283  
WAG-101E18,WAG-106J23,WAG-110B2,WAG-125G18  
ST15BE080           WAG-51P9,WAG-77E21,WAG-113E5  
ST10BE421           WAG-10P15,WAG-38B15  
MCW0297WAG-72J5  
ST10BE207  
WAG-19N20,WAG-40F4,WAG-53B24,WAG-56H21,WAG-59A11,WAG-71F  
23,WAG-85M7  
ST24BE058B  
WAG-24B8,WAG-32E7,WAG-35M11,WAG-37L7,WAG-48J12,WAG-64O5,  
WAG-65L6,WAG-102F12,WAG-105M13,WAG-121K3,WAG-127P14  
ST8BE066WAG-5N23,WAG-48M24,WAG-103G17  
LEI0262   WAG-30C3,WAG-30K3,WAG-36H14,WAG-102C2  
ST13BE045  
WAG-10I9,WAG-18A13,WAG-61M24,WAG-64N8,WAG-101L21,WAG-110  
M23  
ST8BE004WAG-61D16,WAG-80K2,WAG-90M16,WAG-115N8  
ST10BE295  
WAG-18C9,WAG-79C13,WAG-80C11,WAG-127P15,WAG-130O21  
ST10BE393           WAG-34L17  
ST10BE101

6568SupplementTB1.txt

WAG-6H24,WAG-11D7,WAG-32I20,WAG-70A3,WAG-74B1,WAG-128H14  
MCW0031WAG-121G24  
STxBE004WAG-9P2  
ST10BE293  
WAG-44K11,WAG-55A5,WAG-80L3,WAG-83N17,WAG-94F2,WAG-118H9  
ST10BE246  
WAG-1H21,WAG-11N10,WAG-24P4,WAG-49F14,WAG-50G23,WAG-115C  
22  
LEI0119 WAG-105P8  
ST13BE033 WAG-3I13,WAG-39L2,WAG-58D18,WAG-60K8  
ST10BE098 WAG-6N12  
LEI0355  
MAP2K5sts1  
WAG-26J7,WAG-31K6,WAG-36A19,WAG-36B14,WAG-59D17,WAG-67O1  
6,WAG-82H21  
ST28BE025  
WAG-11G2,WAG-21I23,WAG-40N1,WAG-42G11,WAG-57D7,WAG-64H11,  
WAG-75K23,WAG-91I12,WAG-122H2  
MCW0261WAG-29L12  
CCNB2sts1  
WAG-47O2,WAG-73O9,WAG-83B6,WAG-96K5,WAG-102G12,WAG-122N  
1  
LEI0069 WAG-20E8,WAG-32F12,WAG-37C4,WAG-61J1,WAG-61J22  
MCW0330WAG-23I7  
ST8BE026WAG-41O13,WAG-46L17,WAG-62L22  
LEI0088 WAG-21H7  
ST28BE035 WAG-2E16,WAG-79H21  
MCW0166WAG-66P19  
ADL0171  
ROS0266 WAG-17C23  
ST10BE164  
WAG-11J15,WAG-27P11,WAG-41C24,WAG-126A3,WAG-126B12  
ST10BE194  
WAG-9L4,WAG-25D3,WAG-40N12,WAG-82E14,WAG-110B17  
ST24BE088  
WAG-58J9,WAG-60E10,WAG-63J23,WAG-99I22,WAG-107D17,WAG-121  
D14  
ST28BE0104 WAG-60M18  
LEI0073 WAG-37E19



ST10BE018  
WAG-5A18,WAG-33G14,WAG-52A23,WAG-59C22,WAG-63H20,WAG-98L  
24  
ST15BE111  
WAG-2E2,WAG-10O14,WAG-37L1,WAG-60M4,WAG-73K8,WAG-76I14,W  
AG-87H15  
ADL0250 WAG-85M3  
ST28BE057  
WAG-30O12,WAG-32L21,WAG-49N15,WAG-77A20,WAG-111O15,WAG-1  
27N20,WAG-130O10  
HUJ0007  
GCT0906 WAG-54F10,WAG-67N2  
ST28BE071 WAG-60M18  
ST10BE308  
WAG-52B6,WAG-94E23,WAG-111A21,WAG-118I9,WAG-118I  
ST10BE149 WAG-110B17  
LEI0117 WAG-33C1  
LEI0098 WAG-14I20  
ADL0287 WAG-3B3  
MYH@ WAG-19B13  
ST10BE127 WAG-69A24,WAG-89M6,WAG-112G22  
ADL0306 WAG-4J13,WAG-5L13  
ST13BE020  
WAG-6N15,WAG-25H18,WAG-37O1,WAG-65N14,WAG-66E7  
ST24BE031  
WAG-13P9,WAG-18I1,WAG-38E10,WAG-60C11,WAG-70H19,WAG-73D15  
ST10BE173  
WAG-11C16,WAG-28N3,WAG-41B21,WAG-64A7,WAG-100K3,WAG-101L  
12  
MCW0133WAG-38L23  
GCT0027 WAG-37M20  
ROS0004  
MCW0180WAG-12C6  
ST15BE062  
WAG-10J18,WAG-19G6,WAG-23D23,WAG-24G18,WAG-48K11,WAG-69H  
7  
LEI0335  
WAG-122L11,WAG-119P10,WAG-1P22,WAG-123I2,WAG-42I21,WAG-109  
E3

6568SupplementTB1.txt

ST10BE248 WAG-4F2,WAG-29A16,WAG-95C8  
ADL0290 WAG-34F23  
MCW0142  
ST10BE389 WAG-27L23,WAG-34G3,WAG-47A1,WAG-111C2  
MCW0223WAG-25N23  
ADL0179  
ST15BE001  
WAG-10L1,WAG-17J22,WAG-21C20,WAG-44K1,WAG-62G16,WAG-75K1  
5,WAG-82D21,WAG-88E7  
ST13BE048 WAG-47K3,WAG-87E6  
ST12BE001 WAG-4I21  
ST28BE037 WAG-15C10,WAG-24J22,WAG-28M5,WAG-83J16  
LEI0174  
WAG-102O4,WAG-96C13,WAG-20L16,WAG-15N21,WAG-18L9,WAG-120  
H24,WAG-130O7,WAG-127N19,WAG-119L20  
ROS0070  
ADL0042 WAG-40L18,WAG-125E21,WAG-103H9  
ST10BE052  
WAG-30D8,WAG-54K14,WAG-74A20,WAG-75B5,WAG-79P11,WAG-85B1  
9,WAG-91F7,WAG-97O24,WAG-114M8  
ST10BE153  
WAG-12H1,WAG-58I23,WAG-81N11,WAG-109K23,WAG-130H1  
ST10BE325 WAG-85C2  
ST24BE096 WAG-37K21  
ST13BE013  
WAG-36O9,WAG-47K3,WAG-48C9,WAG-85M16,WAG-87E6  
ST10BE392 WAG-2B19,WAG-32P18,WAG-40L7,WAG-121A22  
ABR0330 WAG-34F14  
MCW0246WAG-85P3  
ST10BE057A WAG-86N11  
ST13BE015 WAG-2G19,WAG-123N13  
ST10BE108  
WAG-24D24,WAG-28E16,WAG-30L9,WAG-49O15,WAG-51J1,WAG-87K1  
6,WAG-124E2  
ADL0320 WAG-122M14,WAG-10E13,WAG-90F22,WAG-18K24  
ADL0230  
MCW0282  
ST8BE065  
WAG-5N23,WAG-10D10,WAG-43J5,WAG-65H21,WAG-73C23,WAG-116B

9

MCW0001

LEI0094

WAG-104B17,WAG-86J24,WAG-109I20,WAG-8G3,WAG-95E6,WAG-35K2  
ST10BE001

WAG-35C17,WAG-62M5,WAG-70N14,WAG-77J12,WAG-128B22  
ST10BE343 WAG-20P8,WAG-21C1,WAG-47J20,WAG-93M10

MCW0293WAG-20C14

ST24BE032

WAG-18I1,WAG-30N2,WAG-38E10,WAG-56C21,WAG-70H19,WAG-104N  
2,WAG-119I20

LIMK2sts1 WAG-8N1

ROS0088

ST15BE014

WAG-30E18,WAG-34P19,WAG-63J14,WAG-73B20,WAG-86I18

ROS0268 WAG-56F24,WAG-73M15

ST10BE413

WAG-13K12,WAG-35N16,WAG-43H13,WAG-48D19,WAG-67H10,WAG-74  
F17,WAG-85C2,WAG-110D3

UMA1.136

MCW0290WAG-40A20

ST15BE131

WAG-38A14,WAG-48N23,WAG-58E6,WAG-60N12,WAG-75P8,WAG-95F2,  
WAG-111I21

ST15BE138 WAG-30E18,WAG-86I18,WAG-88L5,WAG-114F13

MCW0081

ST10BE423 WAG-37G7

ST10BE132

WAG-9C7,WAG-36A10,WAG-40H18,WAG-58C22,WAG-62L1,WAG-63A18,  
WAG-73D10

GCT0037

ST10BE080 WAG-G6

ROS0099

ST10BE461 WAG-71N19,WAG-75E20,WAG-101J1

ST10BE146

WAG-4D15,WAG-14O9,WAG-23E2,WAG-61H7,WAG-76B4,WAG-125L4

MCW0132WAG-8G10,WAG-63P9,WAG-87P22,WAG-89G4,WAG-97G24

MCW0329

ST10BE371 WAG-113C16

6568SupplementTB1.txt

MCW0351WAG-61D18,WAG-80K2,WAG-90M16,WAG-115N8  
GCT0014 WAG-47O8,WAG-49J2,WAG-103M6,WAG-124P13  
ST10BE386 WAG-17K23,WAG-37L23,WAG-77N23,WAG-125N2  
MCW0070  
ST24BE043 WAG-7K13,WAG-13J20,WAG-27A5,WAG-59L21  
ROS0076 WAG-111O9  
ST10BE432 WAG-76E24  
ST10BE049  
WAG-6N12,WAG-18C17,WAG-42N15,WAG-64C20,WAG-72G13,WAG-76C  
21,WAG-104A23,WAG-130A7  
ROS0092  
ST15BE117 WAG-37I8,WAG-84E8  
ST10BE214  
WAG-24J16,WAG-34H24,WAG-57K23,WAG-70I24,WAG-101B13  
ST10BE223  
WAG-15M23,WAG-65I16,WAG-85B23,WAG-105C12,WAG-119B19  
GCT0026  
WAG-1I10,WAG-85H6,WAG-10D10,WAG-41D11,WAG-1N19,WAG-126P18  
MCW0116WAG-40J9  
ADL0164  
MCW0313WAG-101A13,WAG-68F15,WAG-102O22,WAG-23C21  
ST28BE028  
WAG-10K15,WAG-46J18,WAG-61M3,WAG-99N6,WAG-121A4  
LEI0070 WAG-10G4,WAG-10K20  
ST15BE017  
WAG-14A5,WAG-44B3,WAG-80I22,WAG-122C13,WAG-123O18,WAG-128  
E18,WAG-129C21  
ST13BE051 WAG-68D1,WAG-121K18  
ABR0323  
PLOD WAG-21B10  
ROS0142  
WAG-72H9,WAG-44D13,WAG-64G9,WAG-3K10,WAG-71G15,WAG-111O  
17,WAG-19M7,WAG-15E17,WAG-87M24  
ROS0310  
ABR0096 WAG-35F1,WAG-126F8,WAG-126J21,WAG-129G5  
ST10BE290  
WAG-20H16,WAG-51A21,WAG-53J16,WAG-56G8,WAG-110P6,WAG-119I  
21  
ABR0042 WAG-10D4,WAG-23G14

6568SupplementTB1.txt

GCT0019 WAG-24C1  
ST24BE059  
WAG-I4,WAG-18B16,WAG-53D10,WAG-59F14,WAG-78H5,WAG-82D7,W  
AG-103D23,WAG-106C8,WAG-107B9,WAG-109M16  
ST10BE256  
WAG-4C22,WAG-33F14,WAG-37A1,WAG-39J5,WAG-79H9,WAG-95C2,W  
AG-96B15,WAG-97E23  
ST13BE055  
WAG-6H13,WAG-18M6,WAG-46D22,WAG-94G21,WAG-104F21  
ST10BE243 WAG-11J15,WAG-126A3  
ADL0254  
ST28BE014 WAG-15C10,WAG-24J22,WAG-83J16  
ST15BE125 WAG-13H11,WAG-86M10,WAG-112P5,WAG-120B2  
MCW0045  
MCW0213WAG-18H2  
LEI0063 WAG-13E2  
MCW0127WAG-9P24,WAG-15C7  
MCW0191WAG-54C2,WAG-59N8  
ROS0124  
UMA1.126  
LEI0346 WAG-34H7  
ST10BE103 WAG-14D19,WAG-87E12  
ST10BE179  
WAG-37E7,WAG-40K19,WAG-62A8,WAG-70G8,WAG-80E6,WAG-103O11  
,WAG-108H8,WAG-121C5  
ST28BE011  
WAG-5E17,WAG-11B17,WAG-17J24,WAG-33F21,WAG-61K12,WAG-61M  
8,WAG-70M6,WAG-104I19,WAG-122B13,WAG-127N7  
GCT0034  
WAG-90F3,WAG-66H23,WAG-79M4,WAG-3P4,WAG-90F2,WAG-21A20,W  
AG-79N4,WAG-69K18  
GCT0050 WAG-42K12,WAG-20P4,WAG-125I4  
ABR0094  
ST10BE113  
WAG-31O4,WAG-44O14,WAG-47F6,WAG-57K8,WAG-62N22,WAG-86P20  
,WAG-89J23,WAG-122A15  
ST10BE270 WAG-20P8,WAG-21C1,WAG-47J20,WAG-93M10  
MCW0002WAG-13B11  
ADL0172

6568SupplementTB1.txt

MCW0039WAG-40O19  
MCW0137WAG-33F20  
ADL0101 WAG-107M5  
UMA4.046 WAG-34J5  
ST13BE049 WAG-102M5  
ST13BE023 WAG-27P20,WAG-120J14  
PLODsts1 WAG-21B10  
LEI0258 WAG-71H22  
LEI0221  
WAG-57E18,WAG-34B3,WAG-81K20,WAG-117H2,WAG-25F8,WAG-58C1  
8  
ADL0214 WAG-34G19,WAG-117E22  
ST24BE021 WAG-110L21,WAG-119J21  
LEI0085 WAG-29I21  
ROS0043 WAG-99E14  
ST10BE258  
WAG-4B17,WAG-30G8,WAG-40B3,WAG-57K8,WAG-59O16,WAG-85D8,  
WAG-86P20,WAG-103N19  
MCW0310  
ST8BE022WAG-1M23,WAG-20O13,WAG-50D16,WAG-79B19,WAG-93I6  
MCW0190  
ADL0124 WAG-111I14  
ST15BE145 WAG-41F24  
ST10BE374 WAG-17I4,WAG-52B6,WAG-94E23,WAG-125D5  
ST15BE140  
WAG-2E2,WAG-2E2,WAG-10O14,WAG-37L1,WAG-64M4,WAG-76I14,WA  
G-87H15  
GCT0023 WAG-61A8  
ST28BE047  
WAG-36L11,WAG-37F15,WAG-46C7,WAG-54G11,WAG-55F5,WAG-61P4  
ADL0169 WAG-26M16  
ST10BE126  
WAG-14B17,WAG-21F7,WAG-56H21,WAG-85M7,WAG-92N10,WAG-96G  
21  
MCW0168  
GCT0004 WAG-85O18,WAG-85D18,WAG-88M24  
ADL0184  
WAG-56O3,WAG-117P5,WAG-O20,WAG-59L7,WAG-110D4,WAG-9A11,W  
AG-103B1,WAG-78P12,WAG-119F5

SCD        WAG-10N18  
 ST10BE317  
 WAG-29M9,WAG-47A19,WAG-61J13,WAG-82M12,WAG-114P21,WAG-11  
 5B20  
 MCW0341  
 ST8BE021  
 WAG-20G14,WAG-104D1,WAG-105C7,WAG-106M5,WAG-114L6,WAG-13  
 0L6  
 ROS0012  
 WAG-105M1,WAG-56H17,WAG-25O14,WAG-69B21,WAG-10B10,WAG-29  
 I21  
 ST15BE009  
 WAG-44P19,WAG-80I13,WAG-81G5,WAG-97O6,WAG-109B14,WAG-121  
 G24  
 MCW0120WAG-21P13  
 MCW0205WAG-118C24,WAG-112J12  
 ROS0021  
 WAG-45I3,WAG-46F3,WAG-46F11,WAG-96E11,WAG-111N6,WAG-113F9,  
 WAG-122K15  
 ST24BE094        WAG-34P1,WAG-51O16  
 MCW0139WAG-73K9  
 MCW0386  
 ST10BE032        WAG-35F1,WAG-68D19,WAG-113B20,WAG-124M20  
 MCW0075WAG-18I1,WAG-38E10,WAG-96G16,WAG-117F11,WAG-128B9  
 ST10BE334  
 WAG-53P7,WAG-64B3,WAG-67L14,WAG-103L19,WAG-128H14  
 MCW0055WAG-2C19,WAG-99I5  
 ST13BE011  
 WAG-61M24,WAG-64N8,WAG-101L21,WAG-110M23,WAG-125B24,WAG  
 -129O1,WAG-129O16  
 MCW0143WAG-40E3  
 ST10BE005        WAG-40N15,WAG-44G1,WAG-71I24,WAG-92I14  
 ST15BE064        WAG-23P1,WAG-51P9,WAG-77E21,WAG-113E5  
 ABR0101  
 ST10BE442        WAG-64D16  
 ST10BE457        WAG-58A12  
 ADL0289 WAG-10D11  
 ST28BE031        WAG-10D15,WAG-127H22  
 UMA4.025

6568SupplementTB1.txt

ST10BE455           WAG-8D10  
ABR0004 WAG-15O18,WAG-17L15  
MCW0187  
ABR0020 WAG-72L13,WAG-81F14,WAG-94P20  
ROS0085 WAG-24J22,WAG-28M5,WAG-83J16  
ST10BE119  
WAG-10J6,WAG-29E18,WAG-31P20,WAG-41G13,WAG-64D3,WAG-78N1  
3,WAG-96C19,WAG-125P3  
LEI0319 WAG-39J22,WAG-50E18,WAG-78O12  
ST10BE353  
WAG-14I8,WAG-31D19,WAG-36J16,WAG-49C17,WAG-59F2,WAG-121B2  
3,WAG-122O5,WAG-130B22  
ROS0069  
ST10BE360           WAG-28P5,WAG-50G22,WAG-79N10,WAG-103I5  
ADL0307  
ST4BE001WAG-24L19  
MCW0101WAG-95J22  
ADL0234 WAG-81D16,WAG-13D4,WAG-117J16  
ST10BE327  
WAG-21N12,WAG-55A5,WAG-57I22,WAG-80L3,WAG-83N17,WAG-94F2,  
WAG-99O10,WAG-118H9  
UMA1.015  
ST28BE045           WAG-107M7  
ST13BE026           WAG-7A19,WAG-29I8,WAG-30H19  
ABR0006  
WAG-54F23,WAG-67N2,WAG-65J2,WAG-54F10,WAG-67N8,WAG-116G1  
6,WAG-120I8,WAG-19A6,WAG-40A1  
ADL0372  
WAG-104F4,WAG-56A10,WAG-113K5,WAG-107O10,WAG-99H13,WAG-6  
6M1,WAG-116B16,WAG-92D16,WAG-17B16,WAG-110O20,WAG-75E9,W  
AG-40E1,WAG-83J21,WAG-68E23,WAG-70B16,WAG-47M1  
MCW0348  
LEI0330 WAG-105F10,WAG-86B8  
HUJ0005 WAG-36I9  
ST10BE192  
WAG-37D10,WAG-50A7,WAG-53G5,WAG-83C15,WAG-103E5,WAG-109L  
9,WAG-112D9  
ST24BE049  
WAG-3F15,WAG-27H16,WAG-31P7,WAG-36O13,WAG-125K9



6568SupplementTB1.txt

MCW0066  
STxBE002WAG-26L6  
ABR0066B WAG-2E16,WAG-79H21  
ADL0267 WAG-29F23  
ROS0304  
BMP7  
MCW0047  
ST10BE231 WAG-23K12,WAG-69A24  
ST10BE405  
WAG-37D10,WAG-50A7,WAG-53G5,WAG-83C15,WAG-103E5,WAG-109L  
9,WAG-112D9  
ADL0299 WAG-32P6  
ADL0033 WAG-20C11  
ST10BE087  
WAG-5P22,WAG-93C12,WAG-95E4,WAG-106O21,WAG-108E7,WAG-113  
C2  
MCW0195WAG-80O11,WAG-104H11,WAG-28K10,WAG-40E15  
ST10BE472  
WAG-55L14,WAG-62A15,WAG-108D3,WAG-109P5,WAG-114A20  
ST10BE011  
WAG-6I19,WAG-16D10,WAG-18C18,WAG-32P9,WAG-47B2,WAG-70N20,  
WAG-77O22,WAG-106A18,WAG-109M19,WAG-123M13  
ADL0245 WAG-6P21  
ST10BE050  
WAG-2E13,WAG-6P16,WAG-40N15,WAG-44G1,WAG-71I24,WAG-88L11,  
WAG-111C20  
ST10BE182 WAG-11O2,WAG-43C6,WAG-111J23,WAG-116F11  
LEI0079 WAG-111C13  
ST10BE219 WAG-36H4,WAG-126N12  
ST8BE015WAG-28I7,WAG-43L7,WAG-62G22,WAG-87D10  
LEI0332  
WAG-45I13,WAG-103G18,WAG-103G15,WAG-74N15,WAG-107E2,WAG-3  
8F17,WAG-117D11  
ST8BE035WAG-57P21  
ST10BE288 WAG-25K10,WAG-77A9  
ST28BE002 WAG-75K23,WAG-87P5,WAG-95C14  
ST15BE081  
WAG-17C11,WAG-20E20,WAG-21A10,WAG-42B14,WAG-49K11,WAG-62  
A18,WAG-67A7,WAG-68C8,WAG-80A15,WAG-81F5,WAG-124M19

6568SupplementTB1.txt

ST15BE102  
WAG-20I16,WAG-41C12,WAG-74G22,WAG-84N22,WAG-98F20,WAG-112  
N23  
LEI0067B WAG-29E8,WAG-31B14,WAG-61J24,WAG-71K7,WAG-78P14  
ST15BE003  
WAG-7G1,WAG-30E18,WAG-34P19,WAG-63J14,WAG-63L13,WAG-98F5  
ST10BE205  
WAG-14D1,WAG-18D3,WAG-23E12,WAG-84D1,WAG-85O10,WAG-88B10  
,WAG-118M5  
MCW0016  
ST24BE056  
WAG-33C3,WAG-50N18,WAG-52H13,WAG-77J23,WAG-110M2,WAG-117  
O10,WAG-118I14  
ROS0028  
ROS0016 WAG-14N9  
ST10BE161 WAG-44J9,WAG-76B20  
MCW0153  
ST8BE046WAG-53D24,WAG-66I21,WAG-69K15,WAG-84K1  
ST10BE158 WAG-30I3,WAG-73O10,WAG-108C9  
ADL0034 WAG-84E10,WAG-121L21  
ST24BE051 WAG-9G24,WAG-63J23  
ADL0125  
ADL0109 WAG-59P11,WAG-62J14  
ST10BE208  
WAG-39P22,WAG-48P7,WAG-65L21,WAG-106J23,WAG-110B2  
ROS0007  
ST10BE291B WAG-53J16,WAG-106E7,WAG-113A17,WAG-114C9  
ST10BE301 WAG-72F15  
ST10BE069 WAG-106H14  
STZBE002WAG-20G2  
ST10BE299 WAG-14M18  
MCW0110WAG-125B24  
ST10BE040  
WAG-13D13,WAG-23G16,WAG-26C5,WAG-62G3,WAG-67P2,WAG-128O8  
LEI0137 WAG-87O17,WAG-112C14  
ADL0150  
UMA1.100  
LEI0101 WAG-25G16  
ADL0201

6568SupplementTB1.txt

ST10BE092           WAG-70E15  
MCW0278  
ST15BE103  
WAG-20I16,WAG-29K7,WAG-41C12,WAG-77K2,WAG-103A15  
JUNDsts1 WAG-E10,WAG-79H21  
ST10BE120  
WAG-43H13,WAG-46P11,WAG-67H10,WAG-70A4,WAG-70G6,WAG-90L1  
4,WAG-122L4  
ADL0193   WAG-22L3  
ST24BE039  
WAG-52E11,WAG-52H15,WAG-61N17,WAG-69D2,WAG-69G20,WAG-102  
C6,WAG-105M13,WAG-124B16  
LEI0168  
LEI0360  
ST10BE095           WAG-2E13  
MCW0065WAG-120C22  
ST2BE001WAG-  
ST8BE059WAG-54G2,WAG-81M5,WAG-90P24  
ABR0049  
LEI0066   WAG-38O1  
MCW0023WAG-7B24  
MCW0211WAG-30E18,WAG-63J14,WAG-73B20  
ST10BE384           WAG-40O6  
ST15BE127  
WAG-38A14,WAG-43O6,WAG-83L8,WAG-109K4,WAG-109K6  
MCW0111WAG-5A14  
MCW0302WAG-49J3,WAG-127G2,WAG-96M5,WAG-130P7,WAG-1M19  
ST10BE047           WAG-35L19,WAG-87G1,WAG-101L6  
STXBE011           WAG-26F18  
ST10BE434           WAG-15K5,WAG-37P21  
ROS0055  
ST10BE058B  
WAG-8E18,WAG-37E7,WAG-40K19,WAG-54H24,WAG-62A8,WAG-70G8,  
WAG-80E6,WAG-82N21,WAG-121C5  
ST8BE044  
WAG-11I22,WAG-28E9,WAG-52E16,WAG-77G20,WAG-78D3,WAG-87F8  
MCW0252WAG-13G16  
ST10BE354           WAG-14N6,WAG-19M19  
ST24BE023

6568SupplementTB1.txt

WAG-4A12,WAG-9G24,WAG-30F11,WAG-34K12,WAG-36B12,WAG-55C3,  
WAG-74O22,WAG-102I16,WAG-109H12,WAG-111I5,WAG-112O5,WAG-1  
28H24  
ST10BE187  
WAG-14N6,WAG-78E18,WAG-86E20,WAG-101K7,WAG-115F4,WAG-116J  
21  
MCW0096WAG-15O9  
CHRNA7sts1  
WAG-66K13,WAG-85I15,WAG-85L14,WAG-102G12,WAG-106I12  
ADL0039A WAG-23P1,WAG-51P9  
ST13BE016 WAG-27F24,WAG-40A11,WAG-98B1,WAG-112E4  
ST10BE264A  
WAG-15H8,WAG-24H7,WAG-26G18,WAG-26O18,WAG-28H21,WAG-68L2  
2,WAG-121B23  
ROS0349  
ST13BE030 WAG-6H13,WAG-46D22,WAG-53M8,WAG-130I2  
ST13BE037  
WAG-6N15,WAG-20H15,WAG-22E21,WAG-28F16,WAG-29K21,WAG-37O  
1,WAG-104G18  
ST10BE261  
WAG-20B19,WAG-30L9,WAG-33I24,WAG-36L14,WAG-49O15,WAG-51J1,  
WAG-71P12,WAG-87K16,WAG-92B10,WAG-98C4,WAG-124E2  
UMA1.034  
LEI0096  
WAG-57N2,WAG-84M3,WAG-64F18,WAG-7O1,WAG-75H8,WAG-12O10,  
WAG-88I2  
ST10BE373 WAG-52B6,WAG-94E23,WAG-118I9,WAG-125D5  
ROS0090  
ADL0036  
ST15BE098  
WAG-109B14,WAG-121G24,WAG-125O21,WAG-128N1  
MCW0238WAG-2B17  
LEI0357  
ST10BE118? WAG-41G13  
ST28BE018  
WAG-3D16,WAG-10K15,WAG-17L13,WAG-37O5,WAG-61L24,WAG-94N1  
3  
MCW0043WAG-15G18,WAG-29E21  
UMA1.125

6568SupplementTB1.txt

ST8BE057WAG-17H19,WAG-20O12,WAG-91F21,WAG-96A11  
LEI0350  
ST28BE052  
WAG-11G2,WAG-40N1,WAG-76H5,WAG-84I1,WAG-111B5,WAG-122H2  
GCT0051 WAG-26D22  
HUJ0010 WAG-122G20  
ST10BE167  
WAG-13K12,WAG-35N16,WAG-43H13,WAG-48D19,WAG-67H10,WAG-74  
F17,WAG-85C2,WAG-90L14,WAG-110D3  
LEI0329 WAG-38M5  
ST10BE163 WAG-37P23  
ST10BE425  
WAG-9K23,WAG-25F13,WAG-38A8,WAG-40L22,WAG-75A10,WAG-87N2  
1,WAG-102K19  
HUJ0008  
ST10BE390  
WAG-26E14,WAG-41J11,WAG-47A1,WAG-53B13,WAG-68A17  
LEI0077  
MCW0135  
ST10BE468  
WAG-20H14,WAG-33C8,WAG-92P23,WAG-96A9,WAG-119G4  
MCW0251  
ROS0065  
ST15BE088  
WAG-34D23,WAG-48C13,WAG-66G21,WAG-82K17,WAG-87F22,WAG-10  
0O16,WAG-102P12,WAG-121I10,WAG-127N18  
ST8BE013WAG-15L9,WAG-64N5  
ROS0145  
ROS0116  
WAG-11N12,WAG-33O18,WAG-40K19,WAG-73M1,WAG-80E6,WAG-82N  
21,WAG-97P7  
LEI0181  
ST10BE285 WAG-15M23,WAG-33M13,WAG-65I16  
ADL0154 WAG-20K21  
ST10BE060 WAG-6C14,WAG-35L19,WAG-55K19  
MCW0098  
WAG-43N2,WAG-91P11,WAG-67P14,WAG-114A6,WAG-52K7,WAG-78J1  
5,WAG-61O4,WAG-43D16,WAG-90O10,WAG-94K13  
ST10BE321

6568SupplementTB1.txt

WAG-33F14,WAG-37A1,WAG-39J5,WAG-44E11,WAG-55F17,WAG-96B15  
,WAG-97E23  
ST10BE474 WAG-8D10,WAG-37B18,WAG-77G5  
ST15BE070 WAG-7C24,WAG-25G20,WAG-40M23,WAG-79G17  
ST28BE009 WAG-5C14,WAG-10D15,WAG-127H22  
LEI0253 WAG-1H12,WAG-77O9,WAG-79N11,WAG-92J21  
MCW0288  
ST28BE078 WAG-121D1  
ST24BE076 WAG-8I15,WAG-24B17,WAG-39L10  
ST10BE444 WAG-126A3  
ST24BE065  
WAG-3C19,WAG-13K16,WAG-20C24,WAG-21J22,WAG-70C6,WAG-77L2,  
WAG-109E15,WAG-114D24  
ADL0206 WAG-3E4  
MCW0174WAG-10N24  
ROS0041  
ST13BE040  
WAG-29L5,WAG-32D22,WAG-44H19,WAG-69B23,WAG-105H14,WAG-10  
9L19,WAG-113I15  
ST10BE441 WAG-44E11,WAG-55F17,WAG-59B20,WAG-64D16  
ST10BE009B WAG-14D1,WAG-98C19  
ST10BE376 WAG-37G22,WAG-62F18  
LEI0083  
WAG-10L1,WAG-17J22,WAG-21C20,WAG-44K1,WAG-62G16,WAG-75K1  
5,WAG-82D21,WAG-88E7  
MCW0079  
ST10BE351 WAG-5D12,WAG-62F22,WAG-101E18  
ST15BE052 WAG-3B7,WAG-3E4,WAG-25G20,WAG-91F8  
IGF1Rsts1  
WAG-11D7,WAG-25N15,WAG-28A2,WAG-32I20,WAG-66O13,WAG-74B1,  
WAG-89J14,WAG-123D13  
MCW0267WAG-17M17  
MCW0375  
UMA4.034 WAG-13B16  
ST10BE328 WAG-53B24  
ST24BE034 WAG-31P7,WAG-39I11,WAG-70P15  
ST10BE059  
WAG-4D24,WAG-50O2,WAG-61A7,WAG-68N20,WAG-81A21,WAG-92L8,  
WAG-112H21

ROS0111  
ST10BE029  
WAG-61E20,WAG-70A4,WAG-70G6,WAG-86O17,WAG-97L17,WAG-110G  
2,WAG-129I12  
B2Msts1 WAG-8K20,WAG-52A23  
LEI0197 WAG-73F20  
ST10BE292  
WAG-14D19,WAG-27I17,WAG-38K3,WAG-44K11,WAG-87E12  
ABR0015  
MCW0061WAG-82A18,WAG-43E10  
MCW0113WAG-89B24  
MCW0004  
WAG-117C7,WAG-57H15,WAG-130B3,WAG-89L16,WAG-64M2,WAG-10  
M7,WAG-86A19  
ST8BE009  
WAG-I7,WAG-20G14,WAG-31K5,WAG-47G5,WAG-61F13,WAG-97I7,WA  
G-117I17,WAG-126P7  
NTRK3 WAG-62D3,WAG-96N16  
ST13BE057  
WAG-55A7,WAG-71B11,WAG-73C9,WAG-81F4,WAG-92L6,WAG-96E13  
ST24BE068  
WAG-3F15,WAG-8I15,WAG-27H16,WAG-36O13,WAG-52D4,WAG-117H6,  
WAG-125K9  
ADL0240 WAG-33L2,WAG-62D14  
MCW0220WAG-108O20,WAG-7P5,WAG-96M22,WAG-109P9,WAG-99D4  
MCW0291  
UMA2.283  
NTN2  
MCW0287  
ST15BE091  
WAG-33I23,WAG-33N17,WAG-48K19,WAG-56D2,WAG-58J20,WAG-64E1  
,WAG-90C20,WAG-110N9  
ST10BE420  
WAG-23I15,WAG-33M21,WAG-68C2,WAG-113N8,WAG-121F22  
LEI0163 WAG-53J15  
MCW0301WAG-21H8,WAG-74B23  
MCW0010  
ST10BE038  
WAG-14H2,WAG-33K3,WAG-39A7,WAG-70O10,WAG-108G18

6568SupplementTB1.txt

ST15BE087  
WAG-30E18,WAG-40O2,WAG-74N2,WAG-79F11,WAG-84F5,WAG-98F5,  
WAG-126P1  
ST8BE017WAG-1L1,WAG-56K19,WAG-96B18,WAG-112P13  
ST15BE079  
WAG-44B3,WAG-81L8,WAG-100N21,WAG-122C13,WAG-123O18,WAG-1  
28E18,WAG-129C21  
ST15BE057           WAG-8B13,WAG-34D23,WAG-79A7,WAG-127N18  
MCW0207  
WAG-13B11,WAG-105L24,WAG-112A4,WAG-7H1,WAG-87P7,WAG-60N5,  
WAG-29G3,WAG-86B22,WAG-92H1,WAG-96G6,WAG-70I1,WAG-104G23,  
WAG-107K21,WAG-73D24,WAG-9I6,WAG-79E3,WAG-44J15  
ST10BE090  
WAG-12H1,WAG-62M5,WAG-81N11,WAG-109K23,WAG-128B22,WAG-13  
0H1  
ST10BE397           WAG-62G10  
ROS0063  
MCW0163WAG-34P3  
LEI0247   WAG-41J22,WAG-66I10,WAG-6J2  
SELEsts1   WAG-  
UMA0166  
ST10BE177  
WAG-26J7,WAG-36A19,WAG-36B14,WAG-59D17,WAG-76K18,WAG-82H  
21  
ADL0157   WAG-29G11  
ST10BE236           WAG-55N5  
ST10BE180  
WAG-4F2,WAG-29A16,WAG-29K13,WAG-68E11,WAG-95C8  
ST10BE221  
WAG-13K12,WAG-35N16,WAG-67H10,WAG-72L22,WAG-85C2,WAG-110  
D3  
MCW0276  
ABR0051  
WAG-85K12,WAG-41H14,WAG-111A20,WAG-114A12,WAG-47K21  
ABR0008   WAG-65M19  
ST13BE004           WAG-35C23,WAG-47E9,WAG-55G18,WAG-125K22  
ST10BE141  
WAG-37E7,WAG-62A8,WAG-70G8,WAG-80E6,WAG-103O11,WAG-108H8  
,WAG-121C5



6568SupplementTB1.txt

ST10BE274           WAG-108C9  
ST10BE124  
WAG-13G16,WAG-24D18,WAG-57M15,WAG-75B2,WAG-75K1,WAG-85K  
14,WAG-109P13  
LEI0062  
WAG-125K24,WAG-73A24,WAG-113J8,WAG-56H17,WAG-25O14,WAG-6  
9B21,WAG-74J10,WAG-59C16,WAG-71C17  
LEI0340   WAG-95A21,WAG-95L18,WAG-99K12,WAG-90L15  
ST10BE315  
WAG-27A22,WAG-33K5,WAG-36B2,WAG-36B18,WAG-39P19,WAG-84P1,  
WAG-115L2  
ST15BE143  
WAG-10O14,WAG-35H17,WAG-42N20,WAG-54L20,WAG-87H15,WAG-94  
J19,WAG-113M14,WAG-129E22  
ST10BE093           WAG-11O2,WAG-28O3,WAG-61A7  
ST10BE212  
WAG-10J6,WAG-29E18,WAG-31P20,WAG-64D3,WAG-125P3  
ST15BE133           WAG-11C2,WAG-47O8,WAG-83K6,WAG-104K12  
ST24BE042           WAG-30N2,WAG-83L3,WAG-99M8  
ST10BE303           WAG-9B12,WAG-40M2  
MCW0358WAG-14J6  
LEI0103  
WAG-6C6,WAG-40D23,WAG-60C8,WAG-117D23,WAG-126E23,WAG-127I  
15  
LEI0116  
WAG-2N17,WAG-14C12,WAG-34F24,WAG-75L3,WAG-95D12,WAG-106O  
15  
MCW0197WAG-32B2,WAG-55I24,WAG-111C18,WAG-123N13  
GCT0006  
ROS0327  
PNO           WAG-62P2  
COM0184sts1           WAG-62K10  
ST10BE241           WAG-20P8,WAG-53B13,WAG-78K14,WAG-93K6  
MEF2Asts1  
WAG-5N24,WAG-7I9,WAG-74P23,WAG-77G21,WAG-99L17,WAG-103O20  
,WAG-105E14,WAG-111A8  
ROS0342  
ST10BE217           WAG-37P23,WAG-75B11  
ADL0236

6568SupplementTB1.txt

ST10BE003           WAG-12O9,WAG-45D14,WAG-71I20,WAG-106H14  
 LEI0339   WAG-96F24  
 ADL0160  
 LEI0223   WAG-54I20,WAG-54A16,WAG-99L14  
 ST10BE027  
 WAG-14B17,WAG-56H21,WAG-85M7,WAG-92N10,WAG-117L24  
 LEI0122   WAG-119N17,WAG-3A15,WAG-14H17,WAG-11G1,WAG-94E11  
 ST15BE112  
 WAG-14A5,WAG-17B7,WAG-44B3,WAG-123O18,WAG-129C21  
 MCW0088WAG-129E8,WAG-91I23  
 MCW0353  
 ROS0030   WAG-66P16,WAG-24M17,WAG-53E13,WAG-78H16,WAG-5K24  
 ST8BE069WAG-48F18,WAG-70F3,WAG-78A21,WAG-125P5  
 MCW0227  
 WAG-3D16,WAG-10K15,WAG-17L13,WAG-37O5,WAG-61L24,WAG-63H5,  
 WAG-76C22,WAG-94N13,WAG-107M12,WAG-122H18  
 LEI0217   WAG-8E17  
 LEI0030  
 WAG-30O12,WAG-49N15,WAG-108H20,WAG-111O15,WAG-113J14,WA  
 G-116H22,WAG-127N20,WAG-130O10  
 ROS0018   WAG-53M1,WAG-23C1,WAG-83I19,WAG-60L17  
 LEI0120   WAG-17C11  
 MCW0271WAG-90M16  
 ST15BE016           WAG-109B14,WAG-125O21,WAG-128N1  
 ROS0334  
 ST8BE060  
 WAG-80I10,WAG-104D1,WAG-105C7,WAG-106M5,WAG-114L6,WAG-130  
 L6  
 ST10BE225           WAG-68D19,WAG-113B20,WAG-126N12  
 ADL0202   WAG-32N22  
 ROS0101  
 ST10BE336  
 WAG-60M15,WAG-62A8,WAG-70G8,WAG-78G18,WAG-103O11,WAG-10  
 8H8,WAG-111G14,WAG-121C5  
 ST1BE001WAG-41F8  
 ROS0113A  
 WAG-13J20,WAG-27A5,WAG-36G16,WAG-59L21,WAG-72B14  
 ST10BE035           WAG-14H6,WAG-17J21,WAG-45D14  
 ST13BE025           WAG-1N22

6568SupplementTB1.txt

ST8BE070  
WAG-44I24,WAG-48F18,WAG-57P21,WAG-60F8,WAG-63H23,WAG-71H2  
0,WAG-76N9,WAG-81B21,WAG-91I18  
LEI0195 WAG-97M14,WAG-62P17  
ADL0284A WAG-15C10,WAG-83J16  
ST10BE431 WAG-13L24,WAG-17F2,WAG-26N6,WAG-26N7  
MCW0122WAG-103C24  
ADL0118 WAG-17I13,WAG-49H2,WAG-109K3  
LEI0099 WAG-47D10,WAG-75O7  
GCT0903 WAG-26O3,WAG-51L4,WAG-60O1,WAG-84G16  
ADL0280 WAG-28M2  
ST10BE268 WAG-6H24,WAG-53P7,WAG-70A3,WAG-128H14  
ST10BE203  
WAG-4D15,WAG-23E2,WAG-25C10,WAG-25P22,WAG-32A6,WAG-61H7,  
WAG-67F5,WAG-76B4,WAG-90F2,WAG-106K21,WAG-125L4,WAG-126A1  
MCW0071  
ST10BE323 WAG-23K12,WAG-111A21,WAG-118I9  
ST10BE067  
WAG-2F6,WAG-3L22,WAG-24A11,WAG-63J20,WAG-70A14,WAG-75C9,  
WAG-100K16  
ST10BE313 WAG-53B24,WAG-85M7  
LEI0169 WAG-28I14  
ST10BE086  
WAG-25K10,WAG-30O21,WAG-77A9,WAG-101E11,WAG-113H23,WAG-1  
15C24  
ADL0146 WAG-107K17  
ADL0111 WAG-26E7  
ST10BE345 WAG-18D3,WAG-38B15,WAG-84D1,WAG-118M5  
ADL0313  
WAG-92N14,WAG-70B24,WAG-63E11,WAG-122F19,WAG-79E2,WAG-79I  
17,WAG-37A22  
MCW0346  
ST10BE330 WAG-37A1  
ST10BE144 WAG-9C7,WAG-77A9,WAG-111C10,WAG-118P13  
ST10BE169 WAG-6F16,WAG-38A10  
ST10BE066 WAG-24D18,WAG-33G17,WAG-34K20  
ST10BE400 WAG-10L4,WAG-15H8,WAG-33F5,WAG-68L22  
ADL0022 WAG-83N24  
ST10BE297 WAG-18D3,WAG-38B15,WAG-84D1,WAG-118M5

6568SupplementTB1.txt

ST8BE033WAG-10H13,WAG-57I16,WAG-57M15,WAG-60H5,WAG-91F21  
ABR0064  
LEI0166 WAG-62P5  
ST10BE265 WAG-43C6,WAG-111J23,WAG-116F11  
CD5sts1 WAG-35O18,WAG-107E21  
MCW0019  
ST10BE476 WAG-66A19,WAG-73A17,WAG-91L23  
ST15BE007 WAG-11J14,WAG-19M8,WAG-107C20  
ST8BE016WAG-96B18  
MCW0009WAG-21N20  
ROS0160  
ST8BE042WAG-11A14  
GCT0049 WAG-13E20,WAG-32I16,WAG-60C4  
MCW0258WAG-21P22,WAG-25H19  
ADL0127 WAG-60B23  
ST2BE003WAG-9D11  
ADL0149 WAG-40G23  
GCT0904  
WAG-5E17,WAG-61K12,WAG-86J12,WAG-121I21,WAG-122B13,WAG-12  
6B13  
UMA2.195  
ROS0005 WAG-68N21  
ST15BE135  
WAG-12N17,WAG-57A22,WAG-58E6,WAG-60N12,WAG-65F3,WAG-74D9  
,WAG-75P8,WAG-112B19,WAG-119C19,WAG-130D18  
ABR0340 WAG-9A9  
ST28BE042 WAG-5E17,WAG-11B17,WAG-127P12  
LEI0061  
LEI0139 WAG-50F17,WAG-50H17  
G5NULL5  
ROS0338  
ROS0102 WAG-23C11  
ST24BE086 WAG-34P1,WAG-51O16,WAG-54B15  
ABR0060  
LEI0145 WAG-21G4  
LEI0248  
ABR0046 WAG-6D17,WAG-33L3,WAG-47I14,WAG-105I15,WAG-115M15  
ROS0095 WAG-15C10,WAG-24J22,WAG-28M5,WAG-48G21,WAG-83J16  
ST10BE422

6568SupplementTB1.txt

WAG-37G7,WAG-76P12,WAG-83M6,WAG-114A5,WAG-118L8  
 ADL0263  
 MCW0097WAG-29L10  
 ST8BE003WAG-90M16,WAG-96B18  
 ADL0131 WAG-33A11,WAG-19J4,WAG-112O4,WAG-75H7,WAG-109A23  
 MCW0300  
 ST24BE025 WAG-21H8,WAG-29M15,WAG-74B23  
 LEI0320  
 WAG-52O7,WAG-38M7,WAG-39M13,WAG-71B3,WAG-87K6,WAG-90O5  
 LEI0130  
 WAG-8M22,WAG-107C9,WAG-45J19,WAG-25A16,WAG-72F16,WAG-112  
 N14  
 ST10BE009A WAG-14D1,WAG-98C19  
 ST10BE023 WAG-35L19,WAG-87G1,WAG-101L6,WAG-107L4  
 ST13BE003 WAG-46D6,WAG-60M14,WAG-64I11,WAG-125K22  
 ST28BE054 WAG-33M19,WAG-80N21  
 ST10BE204 WAG-51E16  
 ROS0307  
 MCW0136WAG-26C2,WAG-31K16,WAG-32O16,WAG-80N2,WAG-81F14  
 MHCY-2B  
 ADAM10sts1  
 WAG-14I8,WAG-31D19,WAG-49C17,WAG-59F2,WAG-122O5,WAG-130B2  
 2  
 ROS0351  
 ADL0247  
 LEI0336 WAG-41O16,WAG-10O24,WAG-18M7,WAG-41N2,WAG-41H10  
 LEI0095  
 ADL0180 WAG-96L18,WAG-60L8,WAG-53O13,WAG-10H5,WAG-50C11  
 ST28BE024 WAG-87P5,WAG-95C14  
 ST13BE018 WAG-18H2,WAG-52F4,WAG-61I2  
 LEI0228  
 WAG-83B11,WAG-12D23,WAG-12B3,WAG-103D10,WAG-60F20,WAG-21  
 D23  
 ST10BE140 WAG-11O2,WAG-43C6,WAG-111J23,WAG-116F11  
 LEI0059 WAG-102D14,WAG-102D  
 ST10BE210  
 WAG-24D24,WAG-30L9,WAG-33I24,WAG-51J1,WAG-71P12,WAG-87K16,  
 WAG-92B10,WAG-124E2  
 LEI0067 WAG-29E8,WAG-31B14,WAG-61J24,WAG-71K7,WAG-78P14

6568SupplementTB1.txt

MCW0338  
LEI0234  
ST10BE083           WAG-32L24  
UMA1.107  
LEI0126   WAG-23F15,WAG-45H17,WAG-21C22,WAG-46J3  
GCT0907   WAG-62E4,WAG-65J15,WAG-73H22,WAG-118G8  
ST28BE033  
WAG-3D16,WAG-10K15,WAG-17L13,WAG-37O5,WAG-61L24,WAG-76C2  
2,WAG-94N13,WAG-99N6,WAG-107M12,WAG-122H18  
ST10BE439  
WAG-3K14,WAG-24L20,WAG-63P8,WAG-87I10,WAG-108F5,WAG-108O1  
2,WAG-112D17,WAG-119O19  
MCW0034WAG-25A22  
ROS0083   WAG-6H13  
ROS0151  
MCW0068WAG-39B16  
ST10BE123           WAG-72B5  
ST10BE191           WAG-33G17,WAG-34K20,WAG-70I24  
MCW0013  
ST13BE024  
WAG-1N22,WAG-2L19,WAG-29I6,WAG-96G20,WAG-119H3  
ST10BE228  
WAG-7K20,WAG-27I17,WAG-38K3,WAG-44K11,WAG-55A5,WAG-83N17  
ST10BE294           WAG-14H6,WAG-17J21,WAG-80C11  
ST10BE458           WAG-33P15,WAG-70H16,WAG-92O11,WAG-125M15  
GHRsts1   WAG-63C18,WAG-69B1  
ST10BE165  
WAG-27P11,WAG-55N5,WAG-66A19,WAG-66E24,WAG-110P17,WAG-12  
6B12,WAG-126H22  
ROS0152  
ST10BE181  
WAG-36A10,WAG-40H18,WAG-58C22,WAG-62L1,WAG-86P10  
MCW0331WAG-102H24  
ROS0082   WAG-28P20  
LEI0118  
ST10BE388           WAG-36M20  
ADL0293   WAG-8L2  
ST8BE040WAG-10D10,WAG-17F1,WAG-65D15,WAG-126M19  
CRYBB2sts1           WAG-31O19,WAG-58F23,WAG-70F4

6568SupplementTB1.txt

ST15BE008 WAG-33I23,WAG-58J20,WAG-107C20  
ST13BE059 WAG-35C23,WAG-46D6,WAG-47E9,WAG-55G18  
MCW0222WAG-77H23,WAG-58H16  
ST10BE259  
WAG-4F2,WAG-65C14,WAG-68E11,WAG-69H5,WAG-95C8,WAG-111J9,  
WAG-118F4  
ST28BE060 WAG-10K15,WAG-46J18,WAG-61L24,WAG-99N6  
ST10BE156  
WAG-11D7,WAG-11D17,WAG-25N15,WAG-39H8,WAG-68G23,WAG-83N  
3,WAG-95F15  
ST10BE063 WAG-14H2,WAG-14H20,WAG-98C19  
ST10BE249  
WAG-2E13,WAG-6F16,WAG-44G1,WAG-71I24,WAG-88L11,WAG-111C20  
ST10BE145  
WAG-28F24,WAG-51E16,WAG-54H5,WAG-63F20,WAG-88D12,WAG-119  
N1,WAG-130C18  
MCW0032WAG-32J5  
ROS0038  
ST10BE014  
WAG-8M20,WAG-40H20,WAG-44H20,WAG-46J7,WAG-53I5,WAG-61I15,  
WAG-79K5,WAG-86F2,WAG-120K19  
ST24BE047  
WAG-39I11,WAG-70P15,WAG-91B10,WAG-106N5,WAG-118E14  
LEI0171 WAG-56A22  
ST10BE174  
WAG-M14,WAG-14H5,WAG-44P1,WAG-72C24,WAG-106G2,WAG-127N2  
3  
LEI0109 WAG-21F16  
ROS0073 WAG-32L22  
MHCB  
ST10BE071 WAG-38M3,WAG-94P3,WAG-98C10,WAG-123M16  
ST10BE403 WAG-112P11  
MCW0123WAG-33D22  
LEI0089 WAG-12M4  
ST10BE396  
WAG-26L16,WAG-28P5,WAG-30F7,WAG-37G8,WAG-64H22  
MCW0206WAG-58J15,WAG-102P14  
ST15BE066 WAG-7G1,WAG-30E18,WAG-63L13,WAG-98F5  
ST24BE095 WAG-17D13

6568SupplementTB1.txt

MCW0216  
MCW0151WAG-13I13,WAG-35K24  
ST10BE196  
WAG-6H24,WAG-53P7,WAG-64B3,WAG-103L19,WAG-128H14  
LEI0162  
LEI0147 WAG-41C2  
ROS0121  
ST24BE040 WAG-37C4,WAG-61J1,WAG-124B16  
ST10BE151 WAG-54J24,WAG-60M23  
ST13BE038  
WAG-32C23,WAG-46D6,WAG-47E9,WAG-55G18,WAG-125K22  
ST10BE372 WAG-113C16  
MCW0176  
CSKsts1 WAG-76B20  
ST10BE276 WAG-9C7,WAG-9C7,WAG-111C10  
ST10BE305  
WAG-24J16,WAG-33K1,WAG-55O14,WAG-57K23,WAG-58P24,WAG-73B  
11,WAG-101B13,WAG-106C4,WAG-107P13,WAG-114P19  
ADL0037  
ST24BE003  
WAG-20E8,WAG-41K8,WAG-53D10,WAG-59F14,WAG-78H5,WAG-82D7,  
WAG-103D23,WAG-106C8,WAG-109M16  
MCW0262WAG-56B11  
ST8BE019WAG-46L17,WAG-55H22,WAG-58D5  
ST15BE123 WAG-43G23,WAG-58F23,WAG-71N20,WAG-111I1  
AGRN  
MCW0209WAG-77M23  
ROS0024 WAG-33G16  
MCW0318WAG-27F20  
ST10BE166 WAG-14D1  
ST24BE089  
WAG-28O19,WAG-37H1,WAG-52A15,WAG-105D11,WAG-125H12  
ST13BE032 WAG-36D13  
ST10BE234  
WAG-50G22,WAG-59D7,WAG-79N10,WAG-96N16,WAG-103I5  
ST13BE047 WAG-47K3,WAG-96E13  
ST10BE139 WAG-53I5  
ABR0326  
MCW0108WAG-31A24



6568SupplementTB1.txt

STXBE012 WAG-41F24,WAG-96A21,WAG-121B7  
ST10BE053  
WAG-6I19,WAG-16D10,WAG-18C18,WAG-28E16,WAG-32P9,WAG-34F3,  
WAG-47B2,WAG-71G12,WAG-77O22,WAG-109M19,WAG-123M13  
MCW0275WAG-29C17  
MCW0052WAG-44B3,WAG-129C21  
ST24BE035  
WAG-4A12,WAG-9G24,WAG-34K12,WAG-36B12,WAG-55C3,WAG-74O22  
,WAG-102I16,WAG-109H12,WAG-111I5,WAG-112O5,WAG-128H24  
MCW0040WAG-39D11  
ST15BE108 WAG-56D2,WAG-58M23,WAG-66O2,WAG-81L8  
ABR0018 WAG-89K16  
ADL0038  
WAG-16D10,WAG-32P9,WAG-70N20,WAG-106A18,WAG-109M19,WAG-1  
23M13  
MCW0230WAG-26A12  
STXBE013 WAG-116B21  
ST10BE254  
WAG-26H4,WAG-59A8,WAG-75E9,WAG-106L4,WAG-126A20  
ST28BE010 WAG-5C14,WAG-15D4,WAG-83D8,WAG-85L24  
ST10BE437 WAG-6M5,WAG-66D9  
MCW0285  
WAG-48L10,WAG-41I6,WAG-61B21,WAG-62P23,WAG-99L7,WAG-13G24  
ST15BE110  
WAG-2E2,WAG-23P1,WAG-52J12,WAG-56C11,WAG-60M4,WAG-62G6,W  
AG-62H6,WAG-67G19,WAG-69F23,WAG-77O17,WAG-86I21,WAG-90E17,  
WAG-116G15  
ST24BE061 WAG-8L4,WAG-24B17,WAG-59J17,WAG-112H19  
ST24BE050 WAG-31P7,WAG-39I11,WAG-91B10,WAG-106N5  
ST10BE332  
WAG-1H21,WAG-11N10,WAG-39N23,WAG-48O5,WAG-67C11  
ST10BE346 WAG-48D24  
ROS0094  
ST10BE379 WAG-3K14,WAG-33K5,WAG-40C1  
LEI0328  
HSP5A  
ST10BE367 WAG-26E5,WAG-73C2,WAG-82O13,WAG-84B7  
ST10BE198 WAG-39H8,WAG-50B12,WAG-72F15  
LEI0111 WAG-69C4

6568SupplementTB1.txt

ST10BE115  
WAG-32L24,WAG-53A5,WAG-54J24,WAG-60D4,WAG-60M23,WAG-62M  
7,WAG-109H17,WAG-115F19,WAG-120O11,WAG-129K21,WAG-130N5  
ST10BE286           WAG-37P23,WAG-75B11  
ADL0105 WAG-115N8,WAG-90M16  
MCW0186  
LEI0209 WAG-25E2  
ST15BE128           WAG-125K19  
ST10BE262           WAG-11J5,WAG-11J15,WAG-27P11  
ST10BE033  
WAG-26J7,WAG-31K6,WAG-35F1,WAG-67O16,WAG-126F8,WAG-126J21  
,WAG-129G5  
ST10BE226  
WAG-17E8,WAG-31P24,WAG-36A19,WAG-57B21,WAG-59D17,WAG-76K  
18,WAG-108G12,WAG-116H7  
ST8BE031 WAG-28I7,WAG-43L7,WAG-62G22  
ST10BE475           WAG-66A19  
ST10BE171  
WAG-4C22,WAG-12C22,WAG-33F14,WAG-61P16,WAG-79H9,WAG-94F8,  
WAG-95C2,WAG-96B15,WAG-103I7  
MCW0165WAG-22L19,WAG-46K8  
MCW0345  
LEI0082  
WAG-11C16,WAG-28N3,WAG-39I9,WAG-41B21,WAG-62N24,WAG-64A7,  
WAG-100K3,WAG-105K7  
ADL0378 WAG-7G1,WAG-35L21,WAG-35M11,WAG-34P19  
ROS0040  
ST10BE099  
WAG-8D23,WAG-52G2,WAG-65B24,WAG-69K20,WAG-87N14,WAG-120P  
16,WAG-128N11  
ADL0253 WAG-8G24,WAG-23G2,WAG-57L20,WAG-89N18  
POU2F3sts1  
WAG-39I11,WAG-70P15,WAG-91B10,WAG-106N5,WAG-118E14  
ROS0105  
ST10BE250           WAG-7O22,WAG-47M23,WAG-51D18,WAG-61I6  
MCW0322  
WAG-20H15,WAG-22E21,WAG-28F16,WAG-29K12,WAG-104G18,WAG-1  
16N8  
ST10BE365

6568SupplementTB1.txt

WAG-59F12,WAG-59F24,WAG-59L12,WAG-59L24,WAG-106O20  
ST10BE277  
WAG-66K13,WAG-85I15,WAG-85L14,WAG-106I12,WAG-121K2  
ST10BE078  
WAG-9F14,WAG-23H20,WAG-24N23,WAG-24P4,WAG-29H18,WAG-47D1  
1,WAG-49K21,WAG-67G14,WAG-102N14,WAG-112J16,WAG-117L5,WA  
G-128F1  
MCW0095WAG-80K9,WAG-53I8  
ST10BE382           WAG-11N10,WAG-39N23  
HSI-2sts1 WAG-48M2  
ST10BE021           WAG-28O3,WAG-61A7,WAG-68N20  
ABR0084 WAG-109J11,WAG-94L13,WAG-34E2  
ADL0225 WAG-32D22,WAG-29L5,WAG-44H19,WAG-113I15  
LEI0194 WAG-30B21  
MCW0349  
ADL0112A           WAG-98C19  
HUJ0106  
GCT0022 WAG-3A13  
ST10BE075  
WAG-23E2,WAG-25C10,WAG-25P22,WAG-32A6,WAG-33L4,WAG-55P20,  
WAG-59E8,WAG-61H7,WAG-67F5,WAG-76B4,WAG-90F2,WAG-106K21,  
WAG-125L4,WAG-126A1  
GALK2sts1  
WAG-24J16,WAG-33K1,WAG-55O14,WAG-57K23,WAG-58P24,WAG-101  
B13,WAG-106C4,WAG-114P19  
LEI0128 WAG-30C3  
LEI0327  
ABR0009 WAG-51K21,WAG-33C1,WAG-32A2  
ROS0013 WAG-27H3  
GCT0902 WAG-75L5,WAG-71K7  
ST10BE188  
WAG-4B17,WAG-30G8,WAG-40B3,WAG-44O14,WAG-57K8,WAG-59O16,  
WAG-62N22,WAG-86P20,WAG-122A15  
ST10BE440           WAG-64D16  
ST24BE079  
WAG-20M12,WAG-41M4,WAG-79A3,WAG-107I24,WAG-121I20,WAG-122  
F24  
LEI0076 WAG-71E5,WAG-76E5  
ABR0024

6568SupplementTB1.txt

LEI0105 WAG-36E13  
ST10BE339 WAG-50A7  
MCW0240WAG-62D14  
ST10BE201  
WAG-10O9,WAG-15E14,WAG-24P4,WAG-50G23,WAG-51F9,WAG-74L24,  
WAG-97L3,WAG-114P22  
ROS0068  
ROS0118  
MCW0194  
WAG-8M20,WAG-13H20,WAG-39A2,WAG-44H20,WAG-46J7,WAG-54O1  
3,WAG-61I15,WAG-98D9,WAG-120K19  
ST15BE077  
WAG-20I16,WAG-29K7,WAG-41C12,WAG-84N22,WAG-98F20,WAG-112N  
23  
CKMTsts1WAG-G6  
ROS0049 WAG-119P4  
GCT0016  
LEI0092 WAG-12O15  
MCW0244WAG-14G12  
ST10BE045  
WAG-4D24,WAG-29A16,WAG-29K13,WAG-76J21,WAG-92L8  
ADL0148 WAG-27G14,WAG-41C20  
ST15BE084 WAG-13H11,WAG-24C16,WAG-43G23  
LEI0155 WAG-17D13  
ST10BE215 WAG-9L4,WAG-25D3,WAG-35J11,WAG-40F12  
ST13BE001  
WAG-10C22,WAG-55A7,WAG-73C9,WAG-81F4,WAG-128B16  
MCW0249WAG-28L15,WAG-28L18,WAG-42D20  
GCT0053 WAG-52K11  
ST10BE125 WAG-29L15,WAG-85K14,WAG-130H4  
ST10BE310  
WAG-43H13,WAG-46P11,WAG-67H10,WAG-85C2,WAG-90L14,WAG-122  
L4  
ST28BE006 WAG-2E16  
MCW0056  
ST10BE130 WAG-6E19,WAG-68D19,WAG-113B20,WAG-126N12  
LEI0342 WAG-20L20  
STXBE007 WAG-D1  
GCT0032

6568SupplementTB1.txt

WAG-76D11,WAG-41I20,WAG-14C10,WAG-50D4,WAG-43K4,WAG-112I2  
0  
ROS0323  
ST10BE341 WAG-33M21,WAG-79C13,WAG-127P15  
ST15BE095 WAG-10L1,WAG-37I8,WAG-75K15,WAG-93D10  
LEI0135 WAG-36G5  
LEI0192 WAG-27G19  
ADL0238  
WAG-123K12,WAG-130A14,WAG-29K19,WAG-42J18,WAG-30G5,WAG-3  
0I5,WAG-86I9,WAG-102C23  
ST28BE061  
WAG-17L13,WAG-37O5,WAG-61L24,WAG-76C22,WAG-94N13,WAG-107  
M12,WAG-122H18  
MCW0233WAG-28K9  
ST10BE279 WAG-29L15,WAG-61I6,WAG-130H4  
ST24BE072  
WAG-34G20,WAG-41P3,WAG-79A3,WAG-90F8,WAG-108O2  
ST10BE008 WAG-14H2,WAG-98C19,WAG-108K4  
ST10BE456 WAG-18H13,WAG-58A12,WAG-68L21  
ADL0260  
WAG-125K24,WAG-73A24,WAG-113J8,WAG-59C16,WAG-56H17,WAG-7  
1C17  
ADL0114 WAG-63M4,WAG-101I19  
ST15BE092  
WAG-2E2,WAG-23P1,WAG-56C11,WAG-60M4,WAG-62G6,WAG-62H6,W  
AG-73A9,WAG-73K9,WAG-86I21,WAG-87H18,WAG-90E17,WAG-116G15  
ST10BE394 WAG-38A8  
MCW0129WAG-38F19  
MCW0103WAG-30B11  
MCW0059  
MCW0007WAG-31M24,WAG-124P20,WAG-69C11  
ST10BE296 WAG-14D1,WAG-18D3,WAG-84D1  
ST13BE021  
WAG-4A24,WAG-25H18,WAG-29D2,WAG-33B23,WAG-38I3,WAG-122P20  
LEI0243 WAG-95I18  
ST10BE154  
WAG-8E18,WAG-11N12,WAG-37E7,WAG-40K19,WAG-54H24,WAG-70G8  
,WAG-73M1,WAG-80E6,WAG-82N21,WAG-97P7,WAG-121C5  
ST10BE106

6568SupplementTB1.txt

WAG-13D13,WAG-23G16,WAG-26C5,WAG-38G10,WAG-60C8,WAG-67P2  
,WAG-128O8  
ST5BE001WAG-38G23  
MCW0141WAG-54M22  
STXBE009           WAG-18P18  
ST28BE056  
WAG-30O12,WAG-49N15,WAG-108H20,WAG-113J14,WAG-116H22,WAG  
-127N20  
HUJ0006  
ST10BE284  
WAG-60B11,WAG-65I16,WAG-85B23,WAG-105C12,WAG-113C16,WAG-1  
19B19  
ST13BE027  
WAG-7A19,WAG-8D15,WAG-12G23,WAG-18N4,WAG-44A11,WAG-48H1  
5,WAG-64J8,WAG-106G3,WAG-122H21  
ST13BE044           WAG-40H4,WAG-102F6  
ROS0128  
ROS0309  
ADL0187  
ST8BE067WAG-1L1,WAG-3L15,WAG-56K19,WAG-112P13  
ST10BE128  
WAG-26C5,WAG-32G11,WAG-43I9,WAG-89M6,WAG-91J11,WAG-112G2  
2  
TVSB3  
ST15BE137  
WAG-20E20,WAG-21A10,WAG-93D24,WAG-124C5,WAG-124M19,WAG-1  
29M23  
ROS0108  
UMA4.038           WAG-12P15,WAG-93E16,WAG-97F6  
MCW0256WAG-20J24  
ST10BE387           WAG-36M20,WAG-94M23,WAG-95K18,WAG-99I6  
ST10BE039  
WAG-32P9,WAG-70N20,WAG-75B5,WAG-91F7,WAG-106A18,WAG-109M  
19  
ST10BE281  
WAG-18C17,WAG-42N15,WAG-64C20,WAG-70H21,WAG-72G13,WAG-76  
C21,WAG-92I14,WAG-104A23,WAG-130A7  
MCW0224WAG-7D6,WAG-21D3  
MCW0255WAG-45F1,WAG-123I17

ST10BE100  
WAG-8D23,WAG-26A13,WAG-32M8,WAG-36B18,WAG-48D1,WAG-64J21  
,WAG-82C23,WAG-87G1,WAG-97P10,WAG-122L16  
ADL0300  
GCT0011  
MCW0236WAG-8F6,WAG-24G1  
LEI0107 WAG-65E16  
ADL0232 WAG-10A5,WAG-13M16  
ST10BE380 WAG-27A22,WAG-33K5,WAG-84P1,WAG-90M1  
LEI0100 WAG-10E16  
ST10BE178  
WAG-3G13,WAG-3G19,WAG-32E23,WAG-39H13,WAG-47O13,WAG-77G  
21,WAG-123O24  
ROS0115  
ABR0036 WAG-120B2,WAG-13H11,WAG-86M10  
ABR0048  
ROS0097  
ADL0259  
ST10BE062  
WAG-6I19,WAG-16D10,WAG-18C18,WAG-32P9,WAG-70N20,WAG-106A1  
8,WAG-109M19,WAG-123M13  
ST10BE152  
WAG-53A5,WAG-53I5,WAG-54J14,WAG-54J24,WAG-60D4,WAG-60M23,  
WAG-75F5,WAG-109H17,WAG-115F19,WAG-120O11,WAG-129K21,WAG  
-130N5  
LEI0072  
ST10BE016 WAG-33O18,WAG-86N11,WAG-97P7  
ADL0041 WAG-84D24  
ADL0379  
ST10BE247  
WAG-4B17,WAG-44O14,WAG-57K8,WAG-62N22,WAG-86P20,WAG-89J2  
3,WAG-122A15  
ROS0003 WAG-59A2  
ST15BE061 WAG-10J18,WAG-61L19,WAG-112N23  
ST10BE017  
WAG-8E18,WAG-11N12,WAG-33O18,WAG-40K19,WAG-54H24,WAG-73  
M1,WAG-80E6,WAG-82N21,WAG-97P7  
ST10BE172 WAG-6E19,WAG-113B20,WAG-126N12  
LEI0334

6568SupplementTB1.txt

WAG-122L8,WAG-122L11,WAG-119P10,WAG-123I2,WAG-42I21,WAG-10  
9E3  
ADL0373 WAG-41H14  
ST15BE059 WAG-125O21,WAG-128N1  
ST15BE002 WAG-8B13,WAG-17J22,WAG-34D23,WAG-79A7  
ST28BE072 WAG-64M15  
ROS0267 WAG-110P17  
ST10BE148 WAG-14A9  
MCW0076  
ST8BE005  
WAG-7C10,WAG-10H13,WAG-55H22,WAG-57I16,WAG-57M16,WAG-60H  
5,WAG-103H6,WAG-103H17,WAG-123A6  
LEI0097 WAG-24J6,WAG-84A4  
ST10BE245 WAG-66K16,WAG-76B12,WAG-86J14,WAG-98D7  
ST28BE026  
WAG-5C14,WAG-10D15,WAG-15D4,WAG-83D8,WAG-85L24  
MCW0167WAG-53N21  
ST8BE052WAG-77H24,WAG-79B19,WAG-93I6  
ST24BE030  
WAG-20E8,WAG-32F12,WAG-37C4,WAG-41K4,WAG-41K8,WAG-61J1,W  
AG-61J22,WAG-92D1,WAG-109M16  
ADL0032/33 WAG-31K3,WAG-86L7,WAG-66A2  
ST10BE324 WAG-54C20,WAG-65H19,WAG-67F23,WAG-103O20  
ST10BE358 WAG-47B3,WAG-91L23  
LEI0087 WAG-27E19,WAG-37K15,WAG-110J13  
ST10BE025  
WAG-8G10,WAG-14D19,WAG-55A23,WAG-64N5,WAG-87E12,WAG-87E2  
3,WAG-87P22,WAG-97G24  
ST10BE089  
WAG-18I3,WAG-35C17,WAG-38A10,WAG-62M5,WAG-70N14,WAG-77J1  
2  
ST24BE027  
WAG-20E8,WAG-32F12,WAG-41K8,WAG-53D10,WAG-59F14,WAG-61J22  
,WAG-82D7,WAG-106C8,WAG-109M16  
MCW0200WAG-26C18  
LEI0080  
WAG-89G11,WAG-79H10,WAG-82C11,WAG-55O17,WAG-107P24,WAG-6  
A23,WAG-58N6,WAG-40C21  
ST10BE097



6568SupplementTB1.txt

WAG-2F6,WAG-12C22,WAG-95C2,WAG-112M22,WAG-113P23,WAG-123  
H7,WAG-129P22  
ST10BE055           WAG-40N15,WAG-64C20,WAG-70H21,WAG-92I14  
ROS0332  
LEI0232  
ST10BE143  
WAG-15M23,WAG-21F7,WAG-33M13,WAG-51B18,WAG-90A9,WAG-127  
J2  
HUJ0001 WAG-83K23,WAG-76A12,WAG-57H4,WAG-32J18,WAG-103M5  
RALDH2sts1           WAG-39P22,WAG-46O7,WAG-48P7,WAG-65L21  
ST10BE051  
WAG-53C21,WAG-71J5,WAG-92G21,WAG-101K20,WAG-104G21,WAG-1  
24B18,WAG-125E4  
ADL0286 WAG-63L14,WAG-88E9,WAG-15L9,WAG-36O20  
ADL0166 WAG-3023  
ST10BE319           WAG-30F7,WAG-32G11  
MCW0134WAG-14A21  
ROS0331  
ST13BE012  
WAG-9I11,WAG-36O9,WAG-47K3,WAG-48C9,WAG-85M16,WAG-96E13  
ST8BE047  
WAG-47G5,WAG-61F13,WAG-97I7,WAG-104D1,WAG-106M5,WAG-114L  
6,WAG-117I17,WAG-126P7  
ADL0192 WAG-45A11  
ST8BE062WAG-11A14,WAG-32O21,WAG-82M23  
ST13BE007  
WAG-29E12,WAG-33G12,WAG-40H4,WAG-102F6,WAG-123B20,WAG-12  
6A17  
ROS0026 WAG-107O6,WAG-8F20,WAG-33N3  
MCW0283WAG-29K15  
ADL0383  
MCW0316WAG-28F23  
ST15BE130           WAG-47O8,WAG-49J2,WAG-124P13  
ADL0309 WAG-19L16  
ST10BE111  
WAG-15G11,WAG-30D8,WAG-39P22,WAG-46O7,WAG-53F23,WAG-54K1  
4,WAG-64J13,WAG-65L21,WAG-79P11,WAG-98A4,WAG-122O6  
ST10BE043           WAG-33O18,WAG-73M1,WAG-82N21,WAG-86N11  
ADL0195

6568SupplementTB1.txt

MCW0181WAG-9J4,WAG-74O20  
ADL0315 WAG-17A24  
ST10BE309  
WAG-5N24,WAG-7I9,WAG-65H19,WAG-74P23,WAG-99L17  
ST10BE184  
WAG-15G11,WAG-30D8,WAG-39P22,WAG-46O7,WAG-53F23,WAG-54K1  
4,WAG-64J13,WAG-65L21,WAG-74A20,WAG-79P11,WAG-98A4,WAG-12  
2O6  
MCW0087WAG-41L4  
ST28BE016  
WAG-11D6,WAG-32P6,WAG-50E22,WAG-68L10,WAG-70D4  
MCW0184WAG-108O20  
ST15BE083  
WAG-3B7,WAG-3E4,WAG-25G20,WAG-44A4,WAG-91F8  
ST10BE240 WAG-26H14,WAG-29K21,WAG-94P3  
ADL0310  
WAG-57F10,WAG-10C22,WAG-36I1,WAG-36I9,WAG-36P1,WAG-36P9,W  
AG-128B16,WAG-81F4  
ROS0149  
ADL0211  
LEI0113 WAG-9O20  
ST15BE006 WAG-25G20,WAG-44A4,WAG-91F8  
ST10BE412  
WAG-8F16,WAG-44K11,WAG-55A5,WAG-57I22,WAG-80L3,WAG-83N17,  
WAG-94F2,WAG-118H9  
MCW0354  
ST10BE096  
WAG-2E13,WAG-6P16,WAG-40N15,WAG-44G1,WAG-71I24  
LEI0352 WAG-19G10,WAG-96F24  
ST10BE019A WAG-52A23,WAG-116J21  
ST10BE349 WAG-64D3  
ABR0079  
MCW0083WAG-32A13  
MCW0178  
ROS0133  
ST10BE470 WAG-3D24,WAG-45A23,WAG-74L15,WAG-100E3  
ADL0380  
LEI0349  
WAG-9C7,WAG-36A10,WAG-62L1,WAG-63A18,WAG-73D10,WAG-77A9,

WAG-111C10,WAG-118P13  
ST10BE418  
WAG-30P11,WAG-52B6,WAG-94E23,WAG-111A21,WAG-118I9,WAG-125  
D5  
ADL0043 WAG-107C4,WAG-71O13  
ST8BE039  
WAG-5N23,WAG-10D10,WAG-43J5,WAG-65H21,WAG-73C23,WAG-116B  
9  
ST8BE036WAG-1L1,WAG-3L15,WAG-56K19,WAG-112P13  
CRYBA4sts1 WAG-43G23,WAG-93I1  
MCW0320  
ST10BE026A WAG-62C5,WAG-67O3,WAG-95M3,WAG-97L17  
ABR0002 WAG-32I6  
ST8BE050WAG-36O20,WAG-89O20  
ADL0272  
WAG-15I8,WAG-32L24,WAG-53A5,WAG-60D4,WAG-60M23,WAG-61L14,  
WAG-62M7,WAG-115F19,WAG-120O11,WAG-129K21  
ST10BE239 WAG-28N3  
ST15BE053 WAG-3B7,WAG-3E4  
ST10BE269 WAG-24D24,WAG-92B10  
MCW0014WAG-38O9  
ADL0142 WAG-10H24  
ST10BE137  
WAG-15I8,WAG-15,WAG-32L24,WAG-60D4,WAG-60M23,WAG-61L14,W  
AG-62M7,WAG-115D12,WAG-129K21  
ST15BE105 WAG-20E20,WAG-93D24,WAG-124C5,WAG-129M23  
ST10BE307 WAG-20P8,WAG-21C1,WAG-47J20,WAG-93M10  
ADL0251  
ST10BE369  
WAG-54C20,WAG-65H19,WAG-103O20,WAG-105E14  
ST10BE447 WAG-93K6  
ST10BE263 WAG-14N6,WAG-116J21  
ST10BE362  
WAG-6M5,WAG-11K6,WAG-50C13,WAG-66D9,WAG-79N5,WAG-79O5,W  
AG-84A12,WAG-106J11  
ROS0052 WAG-112K21,WAG-73F10,WAG-38M18  
MCW0049  
ADL0120  
WAG-87G3,WAG-126L8,WAG-113P19,WAG-83H11,WAG-14E24

6568SupplementTB1.txt

ST10BE453 WAG-85D8  
 ST10BE451 WAG-6P18,WAG-27P8  
 ADL0284 WAG-15C10,WAG-83J16  
 ST24BE084 WAG-70P15  
 UMA2.021  
 UMA2.052  
 ST13BE052 WAG-61I2  
 ST10BE082  
 WAG-26A13,WAG-33P11,WAG-34P2,WAG-87G1,WAG-109H23,WAG-122  
 L16  
 UMA1.220  
 MYO1Ests1 WAG-27P11,WAG-41C24,WAG-66E24,WAG-110P17  
 ADL0244 WAG-32O13  
 ROS0071 WAG-8C15,WAG-34L11  
 GCT0009 WAG-5C14,WAG-10D15,WAG-27H22,WAG-70H4,WAG-85L24  
 ST10BE465 WAG-48M2,WAG-73K1  
 MCW0062  
 ST10BE252  
 WAG-2B20,WAG-14N6,WAG-19M19,WAG-59B9,WAG-65K24,WAG-69I22,  
 WAG-79F20,WAG-96E12,WAG-118B5,WAG-124E5  
 ST10BE030 WAG-36H4,WAG-71I20  
 ST15BE097 WAG-8B13,WAG-17J22,WAG-34D23,WAG-82D21  
 MCW0026  
 ST28BE004 WAG-13G18,WAG-54I20,WAG-71I2  
 STZBE004WAG-21I3  
 ST4BE002WAG-37C7  
 ST10BE419 WAG-33M21  
 ST13BE065 WAG-12D24  
 ST24BE087 WAG-37K21,WAG-107D17  
 ST24BE093 WAG-114D24  
 NR2F2sts1  
 WAG-70E15,WAG-86J14,WAG-98D7,WAG-106E7,WAG-113A17,WAG-114  
 C9  
 ST24BE001 WAG-21H8,WAG-29M15,WAG-37P16,WAG-74B23  
 ST24BE037  
 WAG-25H21,WAG-52H13,WAG-52J4,WAG-57E1,WAG-77J23,WAG-83H3,  
 WAG-95H4,WAG-95N16,WAG-110I2,WAG-120A18,WAG-122F24  
 HUJ0002  
 GCT0002

6568SupplementTB1.txt

WAG-122K3,WAG-117G9,WAG-77G11,WAG-86J1,WAG-67E17,WAG-66M  
11,WAG-40C4,WAG-32P2,WAG-111H14,WAG-117G6  
MCW0378  
ADL0152  
ST8BE001WAG-87D10,WAG-111N6,WAG-113F9,WAG-122K15  
MCW0093WAG-21P6  
UMA1.117  
AGC1sts1 WAG-38M3  
ROS0061  
ST10BE427               WAG-68E21,WAG-76M20,WAG-84N23,WAG-98D20  
ST10BE466  
WAG-65I7,WAG-73B11,WAG-78I17,WAG-92P12,WAG-98O18,WAG-107P1  
3  
ADL0278  
WAG-48E16,WAG-53J24,WAG-90P24,WAG-91A5,WAG-92K22,WAG-100  
A22,WAG-105H7  
ABR0022  
ROS0315  
MCW0214WAG-57B16,WAG-79G16  
ST10BE213               WAG-29L15  
ST10BE407               WAG-111J23  
ST28BE030  
WAG-5E17,WAG-61K12,WAG-86J12,WAG-121I21,WAG-126B13,WAG-12  
7N7  
LEI0074   WAG-96B10  
ST8BE049WAG-15L9,WAG-36O20,WAG-63L14,WAG-88E9  
ST24BE053  
WAG-17F18,WAG-29M15,WAG-64O5,WAG-81E9,WAG-92O9,WAG-110C1  
1,WAG-114P6  
MCW0036WAG-45H10,WAG-114C21,WAG-7G12  
ST15BE075  
WAG-10J18,WAG-19G6,WAG-48K11,WAG-69H7,WAG-105J17  
LEI0090   WAG-28L18  
ABR0328   WAG-125A1  
ST10BE116               WAG-33G17,WAG-70I24  
ROS0050   WAG-77I1,WAG-129M15,WAG-64K22  
ADL0183   WAG-7B24,WAG-74B15  
ABR0007   WAG-123A21  
UMA2.025

6568SupplementTB1.txt

ST24BE058A  
WAG-24B8,WAG-32E7,WAG-35M11,WAG-37L7,WAG-48J12,WAG-64O5,  
WAG-65L6,WAG-102F12,WAG-105M13,WAG-121K3,WAG-127P14  
ST10BE266  
WAG-47O2,WAG-66K13,WAG-85I15,WAG-85L14,WAG-96K5,WAG-102G1  
2,WAG-106I12  
ST10BE454           WAG-8D10  
LEI0198   WAG-24G11  
ADL0194  
ST10BE357           WAG-36L14  
MCW0192WAG-129I8  
ST24BE091           WAG-5N16  
ROS0321  
ABR0050   WAG-118K20,WAG-82C22  
ST15BE104           WAG-86I18,WAG-88L5,WAG-114F13  
ST10BE409           WAG-37G22,WAG-62F18  
MCW0321  
WAG-32J12,WAG-27I20,WAG-102N24,WAG-89C24,WAG-115M24  
MCW0188WAG-122I5  
MCW0266WAG-17F15  
MCW0064WAG-23G24,WAG-28A9  
ABR0322  
ST10BE326  
WAG-14D19,WAG-27I17,WAG-38K3,WAG-44K11,WAG-55A23,WAG-87E1  
2  
MCW0198WAG-67B16  
ROS0008   WAG-32J14  
ST10BE232           WAG-4D15  
MCW0296WAG-43B20,WAG-63M9  
LEI0141   WAG-109B12  
ST8BE006  
WAG-7C10,WAG-10H13,WAG-43F1,WAG-55H22,WAG-58D5,WAG-60H5,  
WAG-73P21,WAG-87M16,WAG-90I2,WAG-123A6  
MCW0335WAG-33E23,WAG-41C5  
ST10BE091  
WAG-15I8,WAG-15,WAG-32L24,WAG-60D4,WAG-61L14,WAG-115D12,W  
AG-116N7,WAG-129K21  
ST19BE001           WAG-55M22  
HUJ0004

6568SupplementTB1.txt

GCT0908 WAG-115N20,WAG-119C6  
LEI0102  
WAG-60H13,WAG-95E24,WAG-89O7,WAG-106K2,WAG-29E23,WAG-79L  
21  
ADL0248 WAG-63O3  
ST10BE037 WAG-104G21  
ST10BE244  
WAG-4C22,WAG-12C22,WAG-33F14,WAG-61P16,WAG-79H9,WAG-94F8,  
WAG-95C2,WAG-103I7,WAG-112M22,WAG-113P23,WAG-123H7,WAG-12  
9P22  
ST10BE273  
WAG-2O16,WAG-60M15,WAG-78G18,WAG-103O11,WAG-111G14,WAG-  
116P17  
ST10BE118 WAG-41G13  
MCW0154WAG-46F8  
ST10BE443 WAG-64D16  
ADL0288 WAG-55P18  
MCW0169  
ST10BE028  
WAG-8G11,WAG-18B17,WAG-28I14,WAG-35G1,WAG-41G13,WAG-53C2  
1,WAG-56F23,WAG-85A1,WAG-97B5,WAG-124B18,WAG-124E9,WAG-12  
5E4  
ST8BE027WAG-46L17  
MCW0074  
ST24BE033 WAG-39I11,WAG-70P15,WAG-106N5,WAG-118E14  
ST10BE335  
WAG-12H1,WAG-32G11,WAG-58I23,WAG-102P17,WAG-109K23,WAG-12  
8J22  
ADL0257 WAG-19P8  
ST10BE006  
WAG-18B17,WAG-53C21,WAG-71J5,WAG-85A1,WAG-86A1,WAG-92G21  
,WAG-101K20,WAG-104G21,WAG-124B18,WAG-125E4  
MCW0082WAG-23I2  
ST28BE077 WAG-119P15  
ST10BE057B WAG-86N11  
ST10BE404  
WAG-8B22,WAG-12C5,WAG-55F3,WAG-61L17,WAG-112P11  
MCW0126WAG-30B3  
LEI0323 WAG-90A18,WAG-120K11

6568SupplementTB1.txt

ST10BE195  
WAG-26H4,WAG-29K12,WAG-94P3,WAG-106L4,WAG-126A20  
ADL0102 WAG-85M7,WAG-117L24  
ST10BE300 WAG-72F15  
ST10BE473 WAG-25J3,WAG-42K13,WAG-46M16,WAG-102G13  
ST13BE036 WAG-30I0,WAG-20H23,WAG-64N8,WAG-125B24  
ADL0200 WAG-53L23,WAG-98P7  
LEI0149 WAG-24H17  
MCW0362  
ST24BE038  
WAG-28O19,WAG-30P18,WAG-33C3,WAG-50N18,WAG-52H13,WAG-110  
M2,WAG-117O10,WAG-118I14  
GATMsts1  
WAG-15I8,WAG-15,WAG-32L24,WAG-43H14,WAG-60D4,WAG-66J15,WA  
G-115D12,WAG-116N7,WAG-126O12,WAG-129K21  
ST28BE051  
WAG-11H23,WAG-32K1,WAG-78G19,WAG-85E19,WAG-91N16,WAG-95O  
21,WAG-111M18,WAG-116O4  
ST10BE401 WAG-47B3  
ADL0371 WAG-11H17  
ST15BE004  
WAG-17C11,WAG-25A10,WAG-39I17,WAG-49K11,WAG-62A18,WAG-67A  
7,WAG-68C8,WAG-75J12,WAG-80A15,WAG-81F5  
ST10BE068  
WAG-24A11,WAG-28A1,WAG-76M9,WAG-76N4,WAG-97N18,WAG-106L  
14,WAG-110B17,WAG-114N6  
ST24BE029 WAG-56J24,WAG-61J1,WAG-124B16  
ST15BE063 WAG-11J14,WAG-33I23,WAG-107C20  
ST8BE056  
WAG-10H13,WAG-57I16,WAG-57M15,WAG-91F21,WAG-103H6,WAG-123  
A6  
ST28BE003 WAG-13G18,WAG-102C19  
MCW0347WAG-15C10,WAG-24J22,WAG-115D12  
MCW0121WAG-30B11  
LEI0331 WAG-60O20  
ST10BE159 WAG-66K13,WAG-106I12,WAG-121K2  
ST10BE010  
WAG-8H5,WAG-16D10,WAG-32P9,WAG-62A14,WAG-75B5,WAG-91F7,W  
AG-93J10,WAG-97O13,WAG-97O24,WAG-106A18,WAG-109M19



6568SupplementTB1.txt

COM0101

WAG-18B17,WAG-53C21,WAG-71J5,WAG-85A1,WAG-92G21,WAG-101K  
20,WAG-124B18,WAG-125E4

LEI0214

MCW0226WAG-74G22,WAG-86N7,WAG-98L20,WAG-112N23

ST10BE135           WAG-14A9,WAG-38M3,WAG-42G15

STxBE005WAG-8N1

ST10BE088           WAG-5P22,WAG-36F17,WAG-41A2,WAG-130N9

ST10BE316

WAG-10D16,WAG-37P21,WAG-52A2,WAG-59A8,WAG-66M1,WAG-122B  
16,WAG-122B

LEI0158   WAG-59B8,WAG-34N23,WAG-104K5,WAG-89P5

ST8BE045WAG-61D16

ST24BE074           WAG-7K13,WAG-27A5,WAG-59L21

ST10BE224           WAG-G6,WAG-5E7

ST10BE185

WAG-24H7,WAG-26O18,WAG-28H21,WAG-33G14,WAG-46D23,WAG-59  
C22,WAG-63K17,WAG-77N21,WAG-112M15,WAG-116I19

RPL4Bsts1

WAG-26A13,WAG-33P11,WAG-34P2,WAG-87G1,WAG-101L6,WAG-107L  
4,WAG-109H23,WAG-122L16

ADL0203   WAG-23I6

ST2BE002WAG-53H21

ST10BE220

WAG-26J7,WAG-31K6,WAG-36A19,WAG-36B14,WAG-59D17,WAG-82H2  
1

ST10BE370           WAG-54C20,WAG-103L19

ADL0161

ST10BE200

WAG-9F14,WAG-14F9,WAG-23H20,WAG-24N23,WAG-24P4,WAG-29H18,  
WAG-47D11,WAG-102N14,WAG-112J16

ST24BE046

WAG-8L4,WAG-20C4,WAG-24B17,WAG-112H19,WAG-116I10

LEI0179

ADL0283   WAG-29K19

MCW0273WAG-51P14,WAG-44E23

ROS0027   WAG-72G19,WAG-23O7,WAG-14H23,WAG-81J23

LEI0165   WAG-130M3

LEI0138   WAG-28M8,WAG-9K5

6568SupplementTB1.txt

ST10BE031  
WAG-11E12,WAG-18B17,WAG-34C11,WAG-59D18,WAG-72B5,WAG-86A  
1,WAG-92G21,WAG-101K20,WAG-104G21,WAG-119D19,WAG-125E4  
ST28BE036 WAG-15C10,WAG-64B15,WAG-79P6  
ST24BE054  
WAG-24B8,WAG-32E7,WAG-35M11,WAG-37L7,WAG-48J12,WAG-64O5,  
WAG-65L6,WAG-92O9,WAG-102F12,WAG-121K3,WAG-127P14  
ADL0239 WAG-14N19  
ST15BE116  
WAG-26J1,WAG-29K7,WAG-37B10,WAG-70D23,WAG-77K2,WAG-84E8,  
WAG-103A15,WAG-109P4  
ST10BE002  
WAG-18I3,WAG-35C17,WAG-38A10,WAG-70N14,WAG-77J12  
MCW0030WAG-29L18  
ST13BE009  
WAG-16L14,WAG-34G13,WAG-34G19,WAG-48M13,WAG-119K24  
LEI0065 WAG-71G13,WAG-61F24,WAG-46D24,WAG-30K23,WAG-11A4  
ST8BE010WAG-I7,WAG-43P21,WAG-61F13,WAG-97I7,WAG-117K19  
ST13BE050 WAG-14G12,WAG-15G22,WAG-47O16,WAG-82E18  
MCW0131WAG-26E13  
ADL0121  
WAG-79O18,WAG-13A23,WAG-102D7,WAG-42I22,WAG-62E13,WAG-76  
D20,WAG-22N19,WAG-86M20,WAG-77J2  
ADL0144 WAG-8D18  
ST10BE206 WAG-M14,WAG-31P24,WAG-72C24,WAG-108G12  
GCT0052  
ST10BE085 WAG-25K10,WAG-37P23  
LEI0200  
UMA1.074  
ST13BE022 WAG-8H8,WAG-14G12,WAG-15G22,WAG-82E18  
MCW0250WAG-17G1,WAG-21E11  
ST10BE041  
WAG-8M20,WAG-40H20,WAG-44H20,WAG-46J7,WAG-61I15,WAG-79K5,  
WAG-86F2,WAG-120K19  
ST24BE082 WAG-5N16  
ST10BE048 WAG-45D14,WAG-71I20  
ROS0058  
ST8BE064WAG-65D15  
MCW0020

6568SupplementTB1.txt

MCW0156WAG-11A4  
MCW0239WAG-41H16  
ST10BE424 WAG-38A8  
MCW0090  
ROS0355  
ABR0023  
ST10BE385 WAG-17K23  
MCW0104WAG-35C23,WAG-55G18,WAG-125K22,WAG-47E9  
ROS0075 WAG-80K2,WAG-87D20,WAG-90M16,WAG-115N8  
ADL0207  
ADL0304  
HUJ0003 WAG-8B18,WAG-9M6  
ST15BE011  
WAG-23P1,WAG-52J12,WAG-56C11,WAG-62G6,WAG-62H6,WAG-67G19  
,WAG-69F23,WAG-77E21,WAG-77O17,WAG-86I21,WAG-113E5,WAG-116  
G15  
ST10BE079 WAG-G6,WAG-5E7  
MCW0044  
MCW0212WAG-26C6  
MCW0080WAG-30E18,WAG-34P19,WAG-63J14,WAG-73B20,WAG-86I18  
ST15BE132  
WAG-23M2,WAG-26M20,WAG-50B14,WAG-80I13,WAG-90C14  
ROS0001  
MCW0046WAG-15L17  
JAK1sts1 WAG-116B9  
ST8BE034WAG-48F18,WAG-57P21  
ST13BE035 WAG-21K2  
LEI0115 WAG-35J17  
ST10BE460  
WAG-15O14,WAG-41L18,WAG-71N19,WAG-82K10,WAG-126I20  
MCW0228WAG-8K20,WAG-52A23  
LEI0252  
MCW0289  
ST15BE124 WAG-13H11,WAG-43G23  
ST10BE147  
WAG-9B12,WAG-24F2,WAG-40M2,WAG-85K24,WAG-121M24  
ST10BE255  
WAG-27A22,WAG-28N3,WAG-84P1,WAG-90M1,WAG-129C7  
ST24BE075 WAG-27A5,WAG-59L21

6568SupplementTB1.txt

LEI0044 WAG-40L3,WAG-111N6,WAG-122K15  
LEI0064 WAG-69P21  
ROS0059  
ROS0117 WAG-89E7,WAG-89M6,WAG-91J11,WAG-112G22  
ROS0125  
ABR0344  
ST24BE064  
WAG-5N16,WAG-17D18,WAG-55B5,WAG-74A23,WAG-89I3,WAG-120M1  
6  
ADL0185  
ROS0250  
ABR0095  
ST24BE067 WAG-17D13,WAG-34P1,WAG-42B3  
ST10BE363 WAG-14A9,WAG-42G15,WAG-118P9  
ST10BE429  
WAG-24E18,WAG-34L7,WAG-56E3,WAG-65D7,WAG-66J10,WAG-74A4,  
WAG-84J17  
MCW0340WAG-36D13  
GCT0033 WAG-69M5  
MCW0115WAG-79I19  
ST28BE090 WAG-88C7  
ROS0010 WAG-21O7  
MCW0003WAG-35L19,WAG-55K19  
MCW0294WAG-114F17  
ROS0086  
ST10BE102  
WAG-14D19,WAG-27I17,WAG-38K3,WAG-44K11,WAG-55A23  
ST10BE056  
WAG-8M20,WAG-13H20,WAG-39A2,WAG-44H20,WAG-46J7,WAG-54O1  
3,WAG-60K20,WAG-61I15,WAG-86F2,WAG-98D9,WAG-120K19  
MCW0038  
ADL0199 WAG-46F5,WAG-24O19,WAG-84L6  
ST15BE119  
WAG-17C11,WAG-25A10,WAG-34E12,WAG-39I17,WAG-67A7,WAG-68C8  
,WAG-75J12,WAG-80A15,WAG-81F5  
MCW0051  
LEI0347  
WAG-80F23,WAG-6E14,WAG-121N2,WAG-94P3,WAG-55F9,WAG-85P3,  
WAG-94N14,WAG-100E11,WAG-55F14,WAG-126L10

6568SupplementTB1.txt

UMA2.187  
ST10BE449           WAG-73C2  
LEI0333  
WAG-9C7,WAG-36A10,WAG-62L1,WAG-63A18,WAG-73D10,WAG-118P1  
3  
ST10BE342           WAG-19M19,WAG-59B9,WAG-62G10  
ROS0316  
ROS0087  
UMA1.003  
GCT0025  
WAG-51K21,WAG-32A2,WAG-17O18,WAG-28P23,WAG-1O16,WAG-33H5  
ROS0148  
MCW0146WAG-9E8,WAG-9N11  
ADL0040 WAG-30C21  
LEI0086  
ST28BE027  
WAG-15D4,WAG-33M19,WAG-47J24,WAG-80O16,WAG-83D8,WAG-85L2  
4,WAG-109O20,WAG-112M2  
ABR0331 WAG-3L9,WAG-15D12  
ST10BE282  
WAG-39P22,WAG-46O7,WAG-48P7,WAG-65L21,WAG-110B2  
ROS0344  
ST10BE237  
WAG-53P7,WAG-67L14,WAG-85O7,WAG-103L19,WAG-128H14  
ROS0113B  
WAG-13J20,WAG-27A5,WAG-36G16,WAG-59L21,WAG-72B14  
ST15BE055           WAG-10L1,WAG-37I8,WAG-93D10  
ST10BE061  
WAG-26A13,WAG-33P11,WAG-34P2,WAG-87G1,WAG-101L6,WAG-107L  
4,WAG-109H23,WAG-122L16  
ROS0044  
ADL0138 WAG-18J6  
ST10BE257           WAG-88L11  
IGF2sts4 WAG-1B15,WAG-10D24,WAG-104I21,WAG-111P8  
ST13BE054  
WAG-13E18,WAG-27M8,WAG-36D13,WAG-83J8,WAG-108F22,WAG-111  
F11  
ABR0032 WAG-13G18,WAG-102C19  
MCW0308WAG-27B8

6568SupplementTB1.txt

ADL0312 WAG-21F16  
ADL0134 WAG-4H21,WAG-117N21,WAG-106F10  
LEI0134 WAG-123C22  
STxBE003WAG-18P18  
ST15BE144 WAG-110C15  
ST10BE036  
WAG-18C17,WAG-42N15,WAG-64C20,WAG-70H21,WAG-72G13,WAG-76  
C21,WAG-92I14,WAG-104A23  
ROS0110  
ST10BE314  
WAG-7O22,WAG-47M23,WAG-51D18,WAG-61I6,WAG-85E6  
ST10BE331 WAG-27A22,WAG-28N3  
ROS0302  
ST8BE032WAG-57I16,WAG-87F19  
ST15BE065  
WAG-14A5,WAG-44B3,WAG-80I22,WAG-122C13,WAG-123O18,WAG-128  
E18,WAG-129C21  
ROS0107  
ST10BE304  
WAG-24J16,WAG-34H24,WAG-57K23,WAG-70I24,WAG-101B13  
ADL0235 WAG-12J18  
ST10BE065  
WAG-13G16,WAG-24D18,WAG-57M15,WAG-75B2,WAG-75K1,WAG-85K  
14,WAG-109P13,WAG-128M7  
ROS0249  
MCW0204WAG-5E17,WAG-61K12,WAG-86J12,WAG-121I21,WAG-127N7  
LEI0143 WAG-35F15  
GCT0007 WAG-81L11  
ADL0158 WAG-28O4,WAG-61E20,WAG-62C5,WAG-67O3,WAG-97L17  
ST8BE054WAG-41O13,WAG-46L17,WAG-62L22  
ROS0064  
GCT0042 WAG-83B16,WAG-56C14,WAG-24G9,WAG-93F5,WAG-117M6  
ST10BE398 WAG-6M13,WAG-62G10  
ROS0119  
ST10BE222  
WAG-7K20,WAG-44K11,WAG-55A5,WAG-80L3,WAG-83N17,WAG-118H9  
MCW0067  
WAG-28O3,WAG-50O2,WAG-61A7,WAG-68N20,WAG-81A21,WAG-92L8,  
WAG-112H21

ST10BE190

WAG-15I8,WAG-15,WAG-23L17,WAG-32L24,WAG-43H14,WAG-60D4,WA  
G-66J15,WAG-87M9,WAG-115D12,WAG-116N7,WAG-126O12,WAG-129  
K21

ST10BE150

WAG-15I8,WAG-15,WAG-23L17,WAG-43H14,WAG-62I13,WAG-64A5,WA  
G-66J15,WAG-83M8,WAG-87M9,WAG-126O12

ST10BE253

WAG-24H7,WAG-26O18,WAG-28H21,WAG-33G14,WAG-59C22,WAG-63K  
17,WAG-112M15,WAG-116I19

MCW0173WAG-39H3

ST24BE041

WAG-15D15,WAG-38B19,WAG-48P8,WAG-55P23,WAG-77K18,WAG-105  
C3,WAG-116P13,WAG-119J21

ST10BE211

WAG-14M18,WAG-23L17,WAG-61A6,WAG-64A5,WAG-121G15

ROS0015

LEI0341 WAG-95L18,WAG-99K12,WAG-8M2

FBN1sts1

WAG-13G16,WAG-24D18,WAG-37F1,WAG-57M15,WAG-75B2,WAG-75K1  
,WAG-99C18

ADL0246 WAG-118M14

ST15BE141

WAG-18K22,WAG-26M20,WAG-53A22,WAG-60A13,WAG-68M6,WAG-79  
K11,WAG-81M16

ST10BE399 WAG-68L22

MCW0011

LEI0265

WAG-68F24,WAG-21G14,WAG-30B1,WAG-50A1,WAG-20L24,WAG-72H6,  
WAG-28G23

ADL0266 WAG-57F2,WAG-45J18,WAG-100N16,WAG-29A11

ST28BE032 WAG-5C14,WAG-10D15,WAG-85L24,WAG-127H22

ST24BE044

WAG-13J20,WAG-27A5,WAG-29A21,WAG-55B5,WAG-59L21,WAG-74A2  
3

ST10BE004

WAG-18C17,WAG-42N15,WAG-64C20,WAG-70H21,WAG-72G13,WAG-76  
C21,WAG-92I14,WAG-104A23,WAG-130A7

MCW0029WAG-28G22

MCW0380  
ST10BE133  
WAG-28F24,WAG-29M9,WAG-51E16,WAG-61J13,WAG-82M12,WAG-88D  
12,WAG-119N1  
ST10BE160  
WAG-47O2,WAG-66K13,WAG-73O9,WAG-83B6,WAG-85I15,WAG-85L14,  
WAG-96K5,WAG-102G12,WAG-122N1  
ADL0317 WAG-112C24  
ST10BE344  
WAG-36L14,WAG-64E17,WAG-86M3,WAG-107B2,WAG-116E9,WAG-127  
D20  
ST10BE157 WAG-8G10,WAG-63P9,WAG-89G4,WAG-97G24  
ST10BE430  
WAG-8G11,WAG-17F2,WAG-18B17,WAG-27I4,WAG-53C21,WAG-112G13  
,WAG-124B18  
ST10BE131  
WAG-14B17,WAG-21F7,WAG-33M13,WAG-92N10,WAG-96G21  
ROS0054  
ST10BE312  
WAG-7K20,WAG-27I17,WAG-38K3,WAG-44K11,WAG-55A5,WAG-83N17,  
WAG-118H9  
DDXBP1sts1  
WAG-26J7,WAG-31K6,WAG-35F1,WAG-126F8,WAG-126J21,WAG-129G5  
ABR0035 WAG-86H17  
MR  
WAG-71P20,WAG-45H2,WAG-120P24,WAG-126H8,WAG-59O4,WAG-124  
L20,WAG-56N17,WAG-83N12  
MCW0234WAG-18C12  
ST10BE267  
WAG-37D10,WAG-50A7,WAG-53G5,WAG-83C15,WAG-103E5,WAG-109L  
9,WAG-112D9  
LEI0196 WAG-28K6  
LEI0212 WAG-121H3,WAG-111J10  
ST10BE242  
WAG-5N24,WAG-32E23,WAG-39H13,WAG-47O13,WAG-74P23,WAG-77G  
21,WAG-99L17,WAG-111A8,WAG-123O24  
ROS0100  
ST10BE094  
WAG-4D24,WAG-28O3,WAG-50O2,WAG-61A7,WAG-68N20,WAG-76J21,



6568SupplementTB1.txt

WAG-81A21,WAG-92L8,WAG-112H21  
ST10BE183 WAG-25K10,WAG-30O21,WAG-77A9  
ST10BE077  
WAG-9F14,WAG-10O9,WAG-14F9,WAG-15E14,WAG-23H20,WAG-24N23,  
WAG-24P4,WAG-58K10,WAG-64E24,WAG-74L24,WAG-102N14,WAG-112  
J16,WAG-114P22  
ST10BE302  
WAG-40M2,WAG-66D9,WAG-79N5,WAG-79O5,WAG-82M2,WAG-84A12,  
WAG-106J11,WAG-110G15,WAG-125P17,WAG-126P24  
MCW0185WAG-130C16  
LEI0067A WAG-29E8,WAG-31B14,WAG-61J24,WAG-71K7,WAG-78P14  
ST10BE193 WAG-29E18,WAG-31P20,WAG-41G13  
ST8BE071WAG-32O21,WAG-37B9,WAG-37B23,WAG-42L12,WAG-86I5  
ST8BE014  
WAG-44I24,WAG-57P21,WAG-60F8,WAG-63H23,WAG-71H20,WAG-76N9  
,WAG-81B21,WAG-85N11,WAG-91I18,WAG-96L7  
ADL0265  
ST10BE463  
WAG-44D2,WAG-70J23,WAG-71M11,WAG-88F20,WAG-94P7,WAG-110F  
7,WAG-114N14,WAG-115B9  
ST10BE168 WAG-14H6,WAG-80C11  
ST15BE078 WAG-86I18  
MCW0367WAG-95N7  
ST10BE391  
WAG-2B19,WAG-17I17,WAG-112P1,WAG-117D1,WAG-122O7  
STZBE001WAG-12E10  
LEI0093 WAG-124H24  
ADL0229  
ADL0270 WAG-109D15,WAG-42B15,WAG-15E5  
ST8BE043WAG-11I22  
MCW0084WAG-29I19  
ST1BE003WAG-20B19  
ABR0065  
ST24BE052  
WAG-58J9,WAG-60E10,WAG-63J23,WAG-99I22,WAG-107D17,WAG-121  
D14  
MCW0018WAG-113A6,WAG-110J6,WAG-109K15  
ST10BE364 WAG-121B23  
ST28BE001

6568SupplementTB1.txt

WAG-5H21,WAG-30M15,WAG-74G17,WAG-83B21,WAG-85A3,WAG-87P  
5,WAG-95C14,WAG-108G8,WAG-115O11,WAG-119I1  
ST10BE138  
WAG-53I5,WAG-54J14,WAG-54J24,WAG-60D4,WAG-60M23,WAG-75F5,  
WAG-109H17,WAG-120O11,WAG-130N5  
ST10BE337  
WAG-37G22,WAG-65C14,WAG-68E11,WAG-69H5,WAG-118F4  
APOA1sts1  
WAG-20E8,WAG-32F12,WAG-37C4,WAG-41K8,WAG-61J22,WAG-82D7,  
WAG-92D1,WAG-99H21,WAG-106C8,WAG-109M16  
ADL0252 WAG-40E8  
ST10BE275 WAG-108K4  
ST10BE235 WAG-55N5  
ROS0353  
ST10BE383 WAG-40O6,WAG-47A19,WAG-82M12,WAG-108N17  
STXBE010 WAG-21L6  
ST10BE121 WAG-35F1,WAG-68D19,WAG-113B20,WAG-124M20  
ROS0096  
ST15BE101  
WAG-44P19,WAG-50B14,WAG-80I13,WAG-81G5,WAG-97O6,WAG-121G  
24  
GCT0013  
ST28BE029  
WAG-20B15,WAG-35E20,WAG-63P12,WAG-68H13,WAG-74N4,WAG-86J  
12,WAG-121I21,WAG-122B13,WAG-126B13  
MCW0100  
WAG-64F2,WAG-129H19,WAG-88B22,WAG-67F17,WAG-31M10,WAG-11  
B1,WAG-50O10,WAG-110P23  
ST10BE338  
WAG-58P24,WAG-61A6,WAG-73B11,WAG-106C4,WAG-107P13  
ST10BE291A WAG-53J16,WAG-106E7,WAG-113A17,WAG-114C9  
ST24BE024  
WAG-4A12,WAG-21H8,WAG-74B23,WAG-80I23,WAG-111I5  
ABR0336 WAG-21P21,WAG-35B16  
ST28BE012  
WAG-5E17,WAG-61K12,WAG-86J12,WAG-121I21,WAG-122B13,WAG-12  
6B13,WAG-127N7  
ROS0123 WAG-8L4,WAG-59J17,WAG-112H19  
MCW0162WAG-12C9

6568SupplementTB1.txt

ST10BE433 WAG-27L3,WAG-39H20,WAG-76E24,WAG-95P1  
RPL4B  
WAG-26A13,WAG-33P11,WAG-34P2,WAG-87G1,WAG-101L6,WAG-107L  
4,WAG-109H23,WAG-122L16  
MCW0042  
ST15BE099 WAG-128N1  
ST10BE070 WAG-72G13  
ST10BE287 WAG-48D24,WAG-70C2,WAG-75B11  
ST8BE002  
WAG-40L3,WAG-69K15,WAG-73M7,WAG-92D12,WAG-111N6,WAG-122K  
15  
ADL0147 WAG-40A11,WAG-67I15,WAG-92B6,WAG-98B1,WAG-119H21  
ADL0039B WAG-23P1,WAG-51P9  
ST13BE014  
WAG-3I13,WAG-26E23,WAG-32B2,WAG-39L2,WAG-58D18,WAG-60K8,W  
AG-71H4,WAG-123N13  
ST15BE139  
WAG-1K8,WAG-9A5,WAG-32L12,WAG-86P7,WAG-110H7,WAG-114F13  
ABR0075 WAG-7J12  
ADL0190 WAG-95P3,WAG-106D15,WAG-41P13,WAG-73E1,WAG-118C1  
ADL0123 WAG-87P13  
ST13BE031  
WAG-10C22,WAG-21K2,WAG-36I9,WAG-36P1,WAG-57F10,WAG-81F4,W  
AG-128B16  
UMA4.056  
LEI0351  
WAG-122L11,WAG-2C9,WAG-119P10,WAG-122G21,WAG-123I2,WAG-42I  
21,WAG-109E3  
ADL0376  
ADL0107 WAG-15H12,WAG-53K21,WAG-99B17  
ST24BE085 WAG-17D13,WAG-34P1  
ADL0136  
ST28BE043 WAG-11D6  
MCW0158  
ST10BE186  
WAG-16D10,WAG-18C18,WAG-24D24,WAG-28E16,WAG-32P9,WAG-109  
M19,WAG-123M13  
NEO1sts1 WAG-25K10,WAG-37P23  
ADL0284B WAG-15C10,WAG-83J16

6568SupplementTB1.txt

ST10BE352           WAG-118P9  
LEI0078  
WAG-115N7,WAG-115J19,WAG-35I5,WAG-73D22,WAG-63D7,WAG-118B  
23,WAG-2P22,WAG-17N9,WAG-71P16  
ROS0029  
ST28BE034           WAG-79H21,WAG-121I21  
ROS0056  
ADL0209  
WAG-3O3,WAG-8G11,WAG-18B17,WAG-21C22,WAG-28I14,WAG-35G1,  
WAG-53C21,WAG-56A12,WAG-56F23,WAG-71J5,WAG-85A1,WAG-85B1,  
WAG-86A1,WAG-92G21,WAG-97B5,WAG-101K20,WAG-124B18,WAG-12  
4E9,WAG-125E4,WAG-127K1,WAG-127L20  
ST28BE008  
WAG-3D16,WAG-10K15,WAG-17L13,WAG-37O5,WAG-61L24,WAG-70K1  
9,WAG-76C22,WAG-82B7,WAG-94N13,WAG-107M12,WAG-122H18  
ROS0066  
LEI0129  
WAG-120O2,WAG-20C14,WAG-49D7,WAG-118K5,WAG-9L1,WAG-34B10,  
WAG-15C2  
LEI0121  
MCW0218WAG-23I21,WAG-23J21  
LEI0338   WAG-10J24,WAG-40D21  
ST10BE377  
WAG-15K5,WAG-28H4,WAG-37P21,WAG-71J18,WAG-105F22  
ST10BE426           WAG-68E21,WAG-90H18,WAG-124E6,WAG-127D20  
ST10BE414  
WAG-12O17,WAG-35N16,WAG-67C16,WAG-72L22,WAG-72M22,WAG-85  
C2  
MCW0060WAG-74P21  
ST15BE121  
WAG-23M17,WAG-36L5,WAG-44B3,WAG-56D2,WAG-58M23,WAG-81L8  
ADL0155  
ST15BE142           WAG-17H24  
ST10BE320           WAG-26E5,WAG-67L14,WAG-124H13  
MCW0328WAG-8C15  
ADL0145   WAG-10E16  
ST10BE013  
WAG-6C6,WAG-13D13,WAG-38G10,WAG-40D23,WAG-60C8,WAG-98B22  
,WAG-117D23,WAG-126E23

6568SupplementTB1.txt

ABR0324  
ST10BE162 WAG-58C22,WAG-62L1,WAG-76B20,WAG-86P10  
ST28BE022  
WAG-54I20,WAG-71I2,WAG-91N16,WAG-92A6,WAG-99L14,WAG-102L22  
,WAG-112K18  
ST10BE361 WAG-64D3,WAG-112P11  
ST8BE008WAG-I7,WAG-43P21,WAG-61F13,WAG-97I7,WAG-117K19  
ST8BE023WAG-43P21  
ADL0217  
UMA3.028  
WAG-100A3,WAG-7D16,WAG-28A6,WAG-108P8,WAG-62P9  
ST10BE329  
WAG-7O22,WAG-8D10,WAG-21B5,WAG-21B,WAG-94D22  
ABR0014 WAG-94B1  
ST13BE041  
WAG-16L14,WAG-31B2,WAG-83I13,WAG-106B6,WAG-110B21,WAG-127  
D9  
MCW0350  
ST8BE012  
WAG-48E16,WAG-90P24,WAG-91A5,WAG-92K22,WAG-100A22,WAG-10  
5H7  
ST24BE066 WAG-3F15,WAG-31P7,WAG-36O13  
CHRNA3sts1  
WAG-28F24,WAG-29M9,WAG-54H5,WAG-63F20,WAG-82M12,WAG-88D  
12,WAG-114P21,WAG-115B20,WAG-119N1,WAG-130C18  
MCW0102WAG-74O10,WAG-81L11  
ST15BE089  
WAG-17C11,WAG-25A10,WAG-34E12,WAG-39I17,WAG-65B10,WAG-66B  
16,WAG-67A7,WAG-68C8,WAG-75J12,WAG-80A15,WAG-81F5,WAG-120  
K22,WAG-129C13  
ST28BE020  
WAG-40K13,WAG-107M7,WAG-117E6,WAG-118N17,WAG-121D5  
ST10BE264B  
WAG-15H8,WAG-24H7,WAG-26G18,WAG-26O18,WAG-28H21,WAG-68L2  
2,WAG-121B23  
ROS0089  
ROS0074  
WAG-117N1,WAG-49K24,WAG-112D24,WAG-49M24,WAG-85E1,WAG-44  
D23,WAG-28P9,WAG-68H6,WAG-13N4

MCW0219WAG-1D2  
ST3BE001WAG-107C4  
LEI0084  
WAG-68P4,WAG-105J23,WAG-96A11,WAG-26M3,WAG-103E15  
ST10BE019B           WAG-52A23,WAG-116J21  
ADL0212  
ADL0370 WAG-36I7  
GCT0024  
ADL0302 WAG-60M16  
ST13BE029           WAG-13J11,WAG-27F24,WAG-53G19,WAG-108L2  
ST17BE001           WAG-28L9  
MCW0324WAG-32O17  
ADL0173 WAG-73H15  
ROS0318  
GCT0005  
WAG-91H11,WAG-84K13,WAG-112A2,WAG-94J14,WAG-78D12,WAG-10  
8L12,WAG-65N11,WAG-82F14  
ST10BE271           WAG-63P9,WAG-87E12,WAG-89G4  
ST10BE355           WAG-21C1  
HUJ0011  
ST15BE086  
WAG-30E18,WAG-34P19,WAG-34P19,WAG-63L13,WAG-73B20,WAG-86I  
18,WAG-98F5  
ST10BE176           WAG-23K12,WAG-69A24,WAG-112G22  
ADL0241  
ST13BE017  
WAG-40A11,WAG-67I15,WAG-92B6,WAG-98B1,WAG-102M5,WAG-119H  
21,WAG-122L12  
ST13BE042           WAG-19D4,WAG-34G19,WAG-68J17,WAG-117E22  
MCW0005  
MCW0292WAG-3P20,WAG-28K4,WAG-33P21  
ST15BE090  
WAG-17C11,WAG-20E20,WAG-21A10,WAG-49K11,WAG-124M19,WAG-1  
29M23  
ST10BE260  
WAG-5N24,WAG-7I9,WAG-65H19,WAG-74P23,WAG-99L17,WAG-103O20  
,WAG-105E14  
ST15BE013  
WAG-81L8,WAG-100N21,WAG-122C13,WAG-123O18,WAG-128E18,WAG

6568SupplementTB1.txt

-129C21  
ST15BE126  
WAG-23D23,WAG-24G18,WAG-48K11,WAG-69H7,WAG-93I23  
LEI0345 WAG-70D3  
ST10BE112  
WAG-30D8,WAG-54K14,WAG-74A20,WAG-75B5,WAG-79P11,WAG-85B1  
9,WAG-91F7,WAG-97O24,WAG-114M8  
MCW0286WAG-5G11,WAG-108N8,WAG-40F11,WAG-102K8  
ST10BE280  
WAG-8G10,WAG-63P9,WAG-87P22,WAG-89G4,WAG-97G24  
ST10BE104  
WAG-M14,WAG-14H5,WAG-44P1,WAG-72C24,WAG-82K18,WAG-82P1,  
WAG-106G2,WAG-127N23  
CHRNA4sts1  
WAG-28F24,WAG-29M9,WAG-54H5,WAG-63F20,WAG-82M12,WAG-88D  
12,WAG-114P21,WAG-115B20,WAG-119N1,WAG-130C18  
MCW0149WAG-5K24,WAG-24M17  
ST15BE058 WAG-109B14,WAG-121G24,WAG-125O21  
MCW0099WAG-63N6  
ADL0197  
ST10BE436  
WAG-5F18,WAG-6M5,WAG-28D19,WAG-40E6,WAG-86C2
